# Supplementary material
Source: ML conference proceedings conference paper supplement (https://openaccess.thecvf.com/content/CVPR2021/html/Harel_Crossing_Cuts_Polygonal_CVPR_2021_paper.html)
Supplement: Supplementary file 2 [file Harel_Crossing_Cuts_Polygonal_CVPR_2021_supplemental.zip]

Archive with 139 entries (90 files):
- 06262-supp.pdf
- Dataset/
- Dataset/D1/
- Dataset/D1/p9/
- Dataset/D1/p9/pieces.csv
- Dataset/D1/p8/
- Dataset/D1/p8/pieces.csv
- Dataset/D1/p2/
- Dataset/D1/p2/pieces.csv
- Dataset/D1/p7/
- Dataset/D1/p7/pieces.csv
- Dataset/D1/p4/
- Dataset/D1/p4/pieces.csv
- Dataset/D1/p6/
- Dataset/D1/p6/pieces.csv
- Dataset/D1/p0/
- Dataset/D1/p0/pieces.csv
- Dataset/D1/p3/
- Dataset/D1/p3/pieces.csv
- Dataset/D1/p1/
- Dataset/D1/p1/pieces.csv
- Dataset/D1/p5/
- Dataset/D1/p5/pieces.csv
- Dataset/D2/
- Dataset/D2/p9/
- Dataset/D2/p9/pieces.csv
- Dataset/D2/p8/
- Dataset/D2/p8/pieces.csv
- Dataset/D2/p2/
- Dataset/D2/p2/pieces.csv
- Dataset/D2/p7/
- Dataset/D2/p7/pieces.csv
- Dataset/D2/p4/
- Dataset/D2/p4/pieces.csv
- Dataset/D2/p6/
- Dataset/D2/p6/pieces.csv
- Dataset/D2/p0/
- Dataset/D2/p0/pieces.csv
- Dataset/D2/p3/
- Dataset/D2/p3/pieces.csv
- Dataset/D2/p1/
- Dataset/D2/p1/pieces.csv
- Dataset/D2/p5/
- Dataset/D2/p5/pieces.csv
- Dataset/D3/
- Dataset/D3/p9/
- Dataset/D3/p9/pieces.csv
- Dataset/D3/p8/
- Dataset/D3/p8/pieces.csv
- Dataset/D3/p2/
- Dataset/D3/p2/pieces.csv
- Dataset/D3/p7/
- Dataset/D3/p7/pieces.csv
- Dataset/D3/p4/
- Dataset/D3/p4/pieces.csv
- Dataset/D3/p6/
- Dataset/D3/p6/pieces.csv
- Dataset/D3/p0/
- Dataset/D3/p0/pieces.csv
- Dataset/D3/p3/
- Dataset/D3/p3/pieces.csv
- Dataset/D3/p1/
- Dataset/D3/p1/pieces.csv
- Dataset/D3/p5/
- Dataset/D3/p5/pieces.csv
- Dataset/Help.txt
- Dataset/D4/
- Dataset/D4/p9/
- Dataset/D4/p9/pieces.csv
- Dataset/D4/p8/
- Dataset/D4/p8/pieces.csv
- Dataset/D4/p2/
- Dataset/D4/p2/pieces.csv
- Dataset/D4/p7/
- Dataset/D4/p7/pieces.csv
- Dataset/D4/p4/
- Dataset/D4/p4/pieces.csv
- Dataset/D4/p6/
- Dataset/D4/p6/pieces.csv
- Dataset/D4/p0/
- Dataset/D4/p0/pieces.csv
- Dataset/D4/p3/
- Dataset/D4/p3/pieces.csv
- Dataset/D4/p1/
- Dataset/D4/p1/pieces.csv
- Dataset/D4/p5/
- Dataset/D4/p5/pieces.csv
- Dataset/Pictorial/
- Dataset/Pictorial/p0/
- Dataset/Pictorial/p0/7.png
- Dataset/Pictorial/p0/1.png
- Dataset/Pictorial/p0/4.png
- Dataset/Pictorial/p0/18.png
- Dataset/Pictorial/p0/11.png
- Dataset/Pictorial/p0/9.png
- Dataset/Pictorial/p0/5.png
- Dataset/Pictorial/p0/17.png
- Dataset/Pictorial/p0/8.png
- Dataset/Pictorial/p0/19.png
- Dataset/Pictorial/p0/3.png
- Dataset/Pictorial/p0/13.png
- Dataset/Pictorial/p0/2.png
- Dataset/Pictorial/p0/12.png
- Dataset/Pictorial/p0/16.png
- Dataset/Pictorial/p0/0.png
- Dataset/Pictorial/p0/15.png
- Dataset/Pictorial/p0/6.png
- Dataset/Pictorial/p0/pieces.csv
- Dataset/Pictorial/p0/14.png
- Dataset/Pictorial/p0/10.png
- Dataset/Pictorial/p1/
- Dataset/Pictorial/p1/7.png
- Dataset/Pictorial/p1/1.png
- Dataset/Pictorial/p1/4.png
- Dataset/Pictorial/p1/18.png
- Dataset/Pictorial/p1/11.png
- Dataset/Pictorial/p1/9.png
- Dataset/Pictorial/p1/5.png
- Dataset/Pictorial/p1/17.png
- Dataset/Pictorial/p1/8.png
- Dataset/Pictorial/p1/19.png
- Dataset/Pictorial/p1/3.png
- Dataset/Pictorial/p1/20.png
- Dataset/Pictorial/p1/13.png
- Dataset/Pictorial/p1/2.png
- Dataset/Pictorial/p1/12.png
- Dataset/Pictorial/p1/16.png
- Dataset/Pictorial/p1/0.png
- Dataset/Pictorial/p1/15.png
- Dataset/Pictorial/p1/6.png
- Dataset/Pictorial/p1/pieces.csv
- Dataset/Pictorial/p1/14.png
- Dataset/Pictorial/p1/10.png
- Videos/
- Videos/positioning.mp4
- Videos/reconstruction0.mp4
- Videos/reconstruction1.mp4
- Videos/reconstruction3.mp4
- Videos/reconstruction2.mp4
