# Supplementary material
Source: ML conference proceedings conference paper supplement (https://openaccess.thecvf.com/content/CVPR2021/html/Harel_Crossing_Cuts_Polygonal_CVPR_2021_paper.html)
Supplement: Supplementary file 2 [file Harel_Crossing_Cuts_Polygonal_CVPR_2021_supplemental.zip › Dataset/D1/p0/pieces.csv]

piece	x	y
0.0	11.991154918281152	-6.284292816646463
0.0	-1.6810054057572767	8.963732340554948
0.0	-10.385407342473753	7.938266602667407
0.0	0.07525782994988572	-10.61770612657588
1.0	-0.6001009749312256	21.89883882273306
1.0	-23.852314795628953	-7.7168508943688146
1.0	-4.4233579155681415	-17.236614756294895
1.0	28.87577368612832	3.0546268279306426
2.0	-10.408230514546995	-1.9383294920301612
2.0	8.484584773121574	-1.0299308368932212
2.0	1.9236457414254529	2.9682603289233804
3.0	-6.631589633333898	30.692109474748044
3.0	-15.383388350604504	20.658448167836927
3.0	-17.470684221147195	0.5911486892294191
3.0	-11.782097288385467	-22.56441221106444
3.0	-1.0072613886229986	-27.900691616329713
3.0	38.10508829996671	-15.665273182120647
3.0	14.169932582127283	14.188670677700333
4.0	19.10448075199183	-4.820884766235639
4.0	-9.341845176603616	16.032235032409243
4.0	-9.486499380593528	15.732170767993255
4.0	-0.2761361947946823	-26.943521034166857
5.0	-13.958535478135232	13.672462913419771
5.0	4.340351778922084	-24.902713505878324
5.0	6.646640942259638	-24.15087532128492
5.0	15.34548444782039	18.901460581765992
5.0	-12.373941690866884	16.47966533197748
6.0	13.471106458714338	-13.03128740845153
6.0	19.27786296488004	-6.215168048156707
6.0	-4.4979308628329076	17.94730186067635
6.0	-4.89066626356369	17.578321832166967
6.0	-23.360372297197795	-16.27916823623509
7.0	-21.61117207194851	1.3542247028114183
7.0	4.495433345243986	-10.195785689113993
7.0	15.310618125897834	-2.011371937700618
7.0	14.517116980546849	1.0625443873545317
7.0	-12.711996379740166	9.79038853664866
8.0	0.9992327968568739	-6.821194730046112
8.0	5.506007569573411	0.13950032219773573
8.0	2.5815650833590427	8.123101720279275
8.0	-9.086805449789333	-1.4414073124309055
9.0	8.295337806495006	-14.443653036386854
9.0	13.55582685733227	8.858751809847798
9.0	-7.051975633217095	11.76613061098236
9.0	-10.529716202849912	8.084238135906519
9.0	-4.26947282776026	-14.265467520349839
10.0	25.49878003390765	-18.233277336160377
10.0	5.545628914662587	13.012013198997593
10.0	-16.900351548139522	13.184739913491567
10.0	-14.144057400430682	-7.963475776328784
11.0	-9.49305096615543	-5.605714375979777
11.0	15.193137732164942	-7.58572123313702
11.0	4.142035705350399	18.26683850431376
11.0	-9.842122471359891	-5.075402895196966
12.0	-5.086760015182727	-7.878676042251409
12.0	8.466680229013834	-2.4898318051525457
12.0	0.3805834011429564	5.736668514580681
12.0	-3.760503614974085	4.631839332823256
13.0	-13.391340007500261	-2.8854368341073067
13.0	5.435808743363163	-2.2222807639657707
13.0	7.955531264137103	5.107717598073058
14.0	2.3149365127903754	0.44327502540221225
14.0	-1.346673971478457	2.0438047997629023
14.0	-0.9682625413119005	-2.4870798251651145
15.0	-11.446228307203898	-3.5023342963004156
15.0	-10.406150489135296	-12.056959854072657
15.0	21.852378796339213	15.559294150373036
16.0	-20.827289403000613	-8.514515193340005
16.0	12.907323006156352	-6.154946371664705
16.0	11.207566918600962	5.257933777694334
16.0	-3.287600521756709	9.411527787310355
17.0	-12.772453093088933	-11.638763595773272
17.0	4.38786524334183	-1.7746051009625792
17.0	12.330266026450309	8.030569288603983
17.0	10.092664913988306	8.392402991100496
17.0	-14.03834309069157	-3.009603582968655
18.0	-0.5704220350056602	11.329063572520283
18.0	-10.726346717903345	2.245156901067832
18.0	1.3945074121504253	-16.493432389553618
18.0	9.90226134075859	2.9192119159654943
19.0	6.624033121971488	-11.55155646756007
19.0	8.716833915238356	-8.799304617074577
19.0	-2.7976470925380172	18.946993435151267
19.0	-12.543219944671817	1.4038676494833933
20.0	-0.005539889107695003	-0.055818339184744534
20.0	0.061545392075437966	0.0028963307554174854
20.0	-0.0560055029677425	0.05292200842934293
21.0	3.948385587391521	9.898501598557944
21.0	-14.420105661430325	-9.250593760641369
21.0	10.471720074038826	-0.647907837916597
22.0	-11.24551879432445	17.354687145114205
22.0	-7.58784693985049	-10.761344181871047
22.0	-2.8244360022990667	-12.301749526038867
22.0	21.657801736473978	5.708406562795714
23.0	-2.285601713685061	-6.620183094982419
23.0	9.021443008871389	-1.688926616842031
23.0	1.649002084332571	9.181196950761144
23.0	-8.38484337951892	-0.8720872389367138
24.0	3.517200150037999	8.733265559651196
24.0	-4.801348434769414	10.552235682010721
24.0	-4.217052585017309	-12.414376753490004
24.0	5.501200869748678	-6.871124488171877
25.0	0.6386115848288517	-1.703193840177757
25.0	0.9268689635589185	1.6452225975760377
25.0	-1.565480548387748	0.05797124260170172
26.0	3.671198153292345	4.8116414518229975
26.0	-5.612009214486213	-1.596691567818477
26.0	1.9408110611938576	-3.2149498840044943
