# Supplementary material
Source: ML conference proceedings conference paper supplement (https://openaccess.thecvf.com/content/CVPR2021/html/Harel_Crossing_Cuts_Polygonal_CVPR_2021_paper.html)
Supplement: Supplementary file 2 [file Harel_Crossing_Cuts_Polygonal_CVPR_2021_supplemental.zip › Dataset/D1/p1/pieces.csv]

piece	x	y
0.0	1.7348715247723066	13.85114074548519
0.0	-15.689074517332987	-4.119955860812153
0.0	0.26506375068267896	-14.72019853495552
0.0	13.689139241878	4.98901365028249
1.0	-3.4279492240661837	-7.434885048522095
1.0	7.83606327745837	8.222157885835562
1.0	-0.24416423944753887	6.249463230478068
1.0	-4.16394981394463	-7.036736067791524
2.0	-5.257521346954375	1.776344849352621
2.0	5.488618266318137	-8.889350781224634
2.0	-0.23109691936377608	7.113005931871995
3.0	16.99446115125494	26.21129817195826
3.0	-22.92911844862295	-19.990014331863506
3.0	5.934657297368019	-6.221283840094764
4.0	-22.01344831278243	-10.060382047365955
4.0	4.148433323762886	-23.44958949076416
4.0	11.743184840548539	-16.21280923133297
4.0	16.02685739927598	9.645526301627838
4.0	-9.905027250804933	40.077254467835274
5.0	-3.533313203394311	13.547689244820997
5.0	-19.610406227043484	4.86047199304634
5.0	11.204295638634761	-9.383624552228873
5.0	11.93942379180303	-9.02453668563848
6.0	-0.25945269002265026	1.5467185994710069
6.0	-0.901703734037332	0.10595718503497037
6.0	0.6848795966998159	-3.767517006394064
6.0	0.4762768273601492	2.11484122188811
7.0	-8.7454738330225	18.899778550557784
7.0	-18.583112249833125	7.826212673199715
7.0	12.99546161737098	-18.953421531153253
7.0	14.333124465484648	-7.772569692604246
8.0	-1.95194324447736	11.876813604887742
8.0	-10.49321791668936	-14.29461761385485
8.0	12.445161161166721	2.417804008967161
9.0	18.982622718913596	-27.442557543610842
9.0	16.921662313056935	14.468873645609612
9.0	-9.87900711283158	22.87164302479335
9.0	-27.264089281816887	16.868936082481724
9.0	1.2388113626778872	-26.766895209273848
10.0	-8.450786838794254	2.0972118942519504
10.0	-3.7071913742295397	-16.92746158036921
10.0	12.045582351189456	7.020870424297848
10.0	0.11239586183432415	7.8093792618194104
11.0	5.6605107119072295	-7.623485335553545
11.0	6.0984181003414735	-7.548844698315876
11.0	16.109216638899337	4.086217012897746
11.0	-1.4408891693323358	17.879868120485376
11.0	-26.427256281815712	-6.793755099513692
12.0	15.044803942593795	-0.49839593583684155
12.0	-1.9196113404091721	17.35393462067481
12.0	-15.940835929815883	0.07739413831027733
12.0	2.815643327631273	-16.93293282314824
13.0	-14.812657958539228	-23.540689736305975
13.0	-6.911194469840357	-27.197631588421917
13.0	19.938542885479034	23.596987642622757
13.0	11.55623776129308	23.47375842939497
13.0	-9.770928218392523	3.6675752527101437
14.0	0.477299058391297	0.6718939481700663
14.0	-0.37858011306414624	2.230212413750958e-05
14.0	-0.0987189453271426	-0.6719162502942155
15.0	0.5253165557782088	6.367399872923487
15.0	-3.2817182811587307	-2.943765825368961
15.0	2.756401725380533	-3.423634047554507
16.0	2.1219025581156763	-17.64352371170427
16.0	3.2235947709551955	15.41001878094236
16.0	2.5846699351421942	15.491793659799644
16.0	-0.6971396139893791	10.362812387601045
16.0	-7.233027650223687	-23.621101116638755
17.0	18.04299717095255	2.807383459237482
17.0	-7.190362258406454	17.958539859494703
17.0	-13.901346820295226	-10.615232163621874
17.0	3.048711907749136	-10.150691155110332
18.0	33.21439341654354	1.4820279483222123
18.0	-29.130202247304517	5.821882665488415
18.0	-33.172432248542	4.60786314150008
18.0	-4.141526871308838	-13.334895259870168
18.0	33.22976795061184	1.4231215045594587
19.0	21.110466610445737	1.4282329068089026
19.0	20.3822681963538	7.589748810273347
19.0	-9.137755565953215	11.787770697688261
19.0	-10.439903266711807	9.466718866114741
19.0	-12.757801114314304	-14.89562603786844
19.0	-9.157274859820197	-15.376845243016817
20.0	1.2148545444262886	0.5620555777961511
20.0	-0.8028176341496561	0.024482622051694825
20.0	-0.4120369102766326	-0.5865381998478459
21.0	7.173760373365531	-8.299618825007
21.0	10.08115203574796	11.493015555957399
21.0	-23.762483841799426	5.605197626441108
21.0	6.507571432685904	-8.798594357391492
22.0	-4.732876929096766	9.689367318377164
22.0	2.6778743267084164	-15.105395691850083
22.0	6.662121893087918	-4.20909737078731
22.0	-4.607119290699565	9.62512574426025
23.0	14.889770827232098	-11.377658398730434
23.0	15.139665096939863	-3.9226825785322696
23.0	-9.552255849585979	12.020118507444609
23.0	-10.192532590339132	11.588909867501382
23.0	-10.284647484246847	-8.308687397683318
24.0	3.759817680367414	-14.062120749047267
24.0	3.350276609293324	13.332852204848283
24.0	-7.110094289660724	0.7292685441989881
25.0	-0.0072650143287704754	0.05862970990219504
25.0	-0.010946000068154048	-0.05999226429615704
25.0	0.01821101439691922	0.0013625543939426105
26.0	0.08253182821503735	0.22667505547053649
26.0	-0.3078395887921241	-0.058598561062204464
26.0	0.2253077605770818	-0.1680764944083187
