# Supplementary material
Source: ML conference proceedings conference paper supplement (https://openaccess.thecvf.com/content/CVPR2021/html/Harel_Crossing_Cuts_Polygonal_CVPR_2021_paper.html)
Supplement: Supplementary file 2 [file Harel_Crossing_Cuts_Polygonal_CVPR_2021_supplemental.zip › Dataset/D1/p2/pieces.csv]

piece	x	y
0.0	19.19833483717121	13.861302967772868
0.0	-26.05453013599043	39.26558662032937
0.0	-13.241004691008394	-12.339257957274187
0.0	3.9425651961305856	-21.300568845445753
0.0	16.154634793696985	-19.4870627853823
1.0	-10.352746653840665	-17.049826613055117
1.0	10.113308637860401	-26.48115673261715
1.0	0.4854466270967694	21.68843171519034
1.0	-0.24600861111650618	21.84255163048191
2.0	-9.838882914802578	19.240551974382914
2.0	-22.259390285813588	18.111654632069982
2.0	15.921779094318685	-18.67869071629799
2.0	16.17649410629748	-18.673515890154874
3.0	-4.367751808961328	-11.638845780803207
3.0	5.707035229141052	-2.99848252771268
3.0	9.315330491616933	10.80610719205471
3.0	2.6381870940987695	11.357184801833192
3.0	-13.292801005895445	-7.5259636853719964
4.0	11.595904042796642	-12.226768263942576
4.0	7.743124929633224	5.165955755661167
4.0	-5.505081180159869	10.365063189617086
4.0	-7.065478375741398	10.25424103652115
4.0	-6.768469416528598	-13.558491717856826
5.0	7.079760822471691	-13.9112845891227
5.0	6.347444928546452	11.036261812573931
5.0	-2.731323166225501	14.26019476178923
5.0	-10.695882584792637	-11.385171985240445
6.0	-6.04011555998995	-6.764011326672716
6.0	2.2788310262581057	-6.000049136333947
6.0	3.7612845337318435	12.764060463006665
7.0	-2.8832475107816777	2.451619092866321
7.0	0.5012965261389589	-7.776073224043083
7.0	2.3819509846427027	5.3244541311767595
8.0	5.187450796453493	1.7978279817418397
8.0	-8.20936952000575	6.372305057686188
8.0	3.021918723552255	-8.170133039428038
9.0	-6.1651775008241385	9.392979425757245
9.0	0.07680673882226784	-6.769018797012126
9.0	6.088370762001876	-2.623960628745115
10.0	-0.2801990161343487	-8.641711192942092
10.0	5.601087171737242	-8.090947551116631
10.0	2.444872510976311	14.779360504394063
10.0	-6.13788923072305	9.262266865004268
10.0	-1.6278714358561481	-7.308968625339604
11.0	-13.70956696068412	9.225622613831906
11.0	6.249995087192556	-15.987972081869538
11.0	7.616254045928394	-15.274328765783762
11.0	10.443730764263332	5.185787599305942
11.0	-10.600412936700152	16.850890634515437
12.0	-3.115523548689959	-3.688203585587188
12.0	7.73967054792446	0.451593269710348
12.0	-4.624146999234499	3.236610315876818
13.0	-0.055414501989330525	0.6027335481969662
13.0	-0.4295267175822938	0.0951736927612809
13.0	0.4849412195716174	-0.6979072409582487
14.0	-2.8936074186158267	-19.440208773770333
14.0	23.344368994326388	10.775154154285987
14.0	-8.78206797676575	20.475307464391314
14.0	-11.668693598944827	-11.810252844906943
15.0	9.403680972268193	9.642074157241353
15.0	-13.244677733115223	5.585970288773698
15.0	-9.37811816797725	-18.725251627133282
15.0	13.219114928824277	3.4972071811182603
16.0	-7.325052794435764	-32.234121321191544
16.0	19.939391220788295	9.111333890744845
16.0	14.32573911630898	23.23992542059116
16.0	-0.9193847237556487	17.539837390514666
16.0	-26.020692818905864	-17.656975380659123
17.0	12.91153032223615	4.867584758788146
17.0	-3.0594369602368605	14.447236773879471
17.0	-13.889661664401375	-1.3570982090234391
17.0	4.037568302402082	-17.957723323644174
18.0	-17.41563469488821	7.782369034534139
18.0	-17.37789653868828	3.2816582440433115
18.0	12.532633324716729	-10.149440739127565
18.0	12.81354411838715	-9.038774614888275
18.0	9.447353790472619	8.124188075438386
19.0	17.88275424388834	-3.2281677323562072
19.0	-15.241811725122899	23.88659017799784
19.0	-7.281902105784687	-2.882683416595989
19.0	4.640959587019248	-17.775739029045646
20.0	10.095297737646828	-3.2397415461466856
20.0	-0.832815132579943	11.43756021732036
20.0	-7.502641314715182	7.779874766633007
20.0	-1.7598412903517113	-15.977693437806685
21.0	-0.28024252726016635	-0.053928940769854584
21.0	-0.07802953904839774	-0.4096174751117235
21.0	0.3582720663085639	0.4635464158815779
22.0	8.199663850457085	-1.2962975735825728
22.0	5.915234349942774	8.248554223037326
22.0	-11.008357208156834	-2.7513052741481085
22.0	-3.106540992243018	-4.200951375306646
23.0	-3.5846955251348143	-20.869943854922013
23.0	19.351656995141486	11.43035837992867
23.0	2.5227447396920124	15.734215150296409
23.0	-18.289706209698668	-6.294629675303052
24.0	1.601305360446992	-4.525266125452582
24.0	4.0320484987978835	-0.609589736492783
24.0	-5.633353859244873	5.134855861945362
25.0	-3.580154662164189	7.185152000624141
25.0	-12.80425588685755	-1.9231595640952437
25.0	3.991326314828941	-6.416825801947701
25.0	5.119204207163821	-5.257311788007232
25.0	7.273880027028956	6.412145153426017
26.0	19.43157349308415	-10.228498121623685
26.0	20.553996234560415	19.892007938329545
26.0	-19.840260462069292	-1.5389029021925391
26.0	-20.14530926557529	-8.12460691451332
