# Supplementary material
Source: ML conference proceedings conference paper supplement (https://openaccess.thecvf.com/content/CVPR2021/html/Harel_Crossing_Cuts_Polygonal_CVPR_2021_paper.html)
Supplement: Supplementary file 2 [file Harel_Crossing_Cuts_Polygonal_CVPR_2021_supplemental.zip › Dataset/D1/p3/pieces.csv]

piece	x	y
0.0	6.892309025212274	12.664541917378262
0.0	-28.640280829012255	20.712606092074545
0.0	-26.271441180091422	4.386024437063838
0.0	10.841635888987476	-19.665956800826436
0.0	37.177777094903924	-18.097215645690223
1.0	17.515975239632077	-12.42439031420019
1.0	17.60428945314243	-5.3014868806213595
1.0	5.315469951646015	10.84104173735402
1.0	-27.451663363258096	17.339608283400604
1.0	-12.984071281162452	-10.454772825933045
2.0	-1.2876709473979742	-7.445654229003482
2.0	7.310585669696636	18.759760976606966
2.0	-6.022914722298669	-11.314106747603482
3.0	-5.955409321301887	-12.739779873852202
3.0	3.900801937914818	-9.726030766727005
3.0	9.559035679221616	23.219046063584635
3.0	-7.504428295834557	-0.7532354230054443
4.0	-2.5866453070383035	0.1911207289485363
4.0	-0.2219442951778019	-4.337815985784825
4.0	2.8085896022160983	4.146695256836302
5.0	-15.11430561713284	-8.8137334329907
5.0	7.629512698253553	-6.3768418596954035
5.0	8.810770095002965	-2.709111530656479
5.0	14.074779754050736	24.90000975012121
5.0	-15.400756930174419	-7.000322926778626
6.0	16.29316191546015	-2.166164564764596
6.0	-19.001581411143025	8.455420306819232
6.0	-14.204108539212102	3.169347805302497
6.0	16.912528034894997	-9.458603547357132
7.0	-7.404186627697062	11.483284398427932
7.0	-10.945767040370852	3.259593153746225
7.0	-0.12071092474843292	-19.929594305136902
7.0	14.049189959233598	-12.933785980860977
7.0	4.421474633582732	18.120502733823795
8.0	-16.13007813301319	3.2150070145645717
8.0	9.720156085835747	-11.31991289883571
8.0	22.42700962379243	4.646944599017942
8.0	-16.017087576614966	3.4579612852531842
9.0	0.6749380591581946	0.5615373684134397
9.0	-1.039525055762799	0.6888455240231988
9.0	0.3645869966046046	-1.2503828924366316
10.0	7.7785910734914845	-25.72288924030074
10.0	18.09474863155175	-1.905040579389701
10.0	-1.4579147886582078	36.859933293512405
10.0	-24.415424916385014	-9.232003473821969
11.0	12.45124441991732	-10.96672745513906
11.0	-6.980149101359671	18.531005898483155
11.0	-11.097403955259571	12.41331861162404
11.0	5.626308636701937	-19.97759705496814
12.0	17.896845831605805	10.838800351412955
12.0	-10.976287062961106	16.728373152531063
12.0	-18.226592234889583	-19.256357928017778
12.0	11.306033466244925	-8.310815575926249
13.0	-19.286124403760283	-14.68249541806684
13.0	-5.1674763617154085	-22.67183866661764
13.0	25.088717018787175	23.564820132072324
13.0	-0.6351162533114793	13.789513952612165
14.0	0.634774976162337	-0.7711040945097086
14.0	0.4246222471853184	-0.19954395228132718
14.0	-1.6054781245933265	1.8501966267649421
14.0	0.5460809012456748	-0.8795485799739002
15.0	-3.9887959617619066	8.513531229197556
15.0	-9.319743077021641	6.433724674161859
15.0	-5.748726460950259	-6.291759732804184
15.0	-2.9183101737821078	-8.157231128197868
15.0	21.97557567351592	-0.4982650423573645
16.0	2.857248207558789	19.437161989642004
16.0	-16.99672802502735	-10.769612644237151
16.0	-3.1369564101812	-20.00723892493786
16.0	17.276436227649754	11.339689579532992
17.0	9.338174649782408	-14.134660823091647
17.0	9.998238690289883	-14.03418580000051
17.0	-6.5018145455282115	18.329451350854505
17.0	-12.834598794544078	9.839395272237653
18.0	0.06615509496346887	0.04129299243866232
18.0	-0.08478091109028892	0.12844163822635019
18.0	0.018625816126823166	-0.16973463066499864
19.0	19.993201800502803	19.629593008365845
19.0	-15.229771739885784	4.353473252499754
19.0	-24.21715248045563	-28.448091552577942
19.0	0.6204704066454385	-12.528041502850156
19.0	18.83325201319317	16.993066794562495
20.0	-22.879750009182114	9.44923186128223
20.0	-15.54403733868671	-5.484124248780974
20.0	19.48280486109633	-2.5256113325856853
20.0	18.940982486772455	-1.4394962799155944
21.0	6.474620984226814	-20.277717731062612
21.0	12.530450653645318	4.912309729105428
21.0	-19.00507163787212	15.365408001957173
22.0	0.05932488031222434	-9.688318276071447
22.0	4.969849149982668	8.894181674452472
22.0	-5.02917403029488	0.7941366016189826
