# Supplementary material
Source: ML conference proceedings conference paper supplement (https://openaccess.thecvf.com/content/CVPR2021/html/Harel_Crossing_Cuts_Polygonal_CVPR_2021_paper.html)
Supplement: Supplementary file 2 [file Harel_Crossing_Cuts_Polygonal_CVPR_2021_supplemental.zip › Dataset/D1/p4/pieces.csv]

piece	x	y
0.0	1.165359660313611	0.19295223877963213
0.0	-0.637592833231945	1.0594708751629143
0.0	-0.5277668270816698	-1.2524231139425523
1.0	5.311207406527299	-9.788874946723116
1.0	1.1079685644052293	7.404184653771892
1.0	-2.3015536992180947	8.236649724224243
1.0	-4.1176222717144455	-5.851959431273009
2.0	-8.321811531830148	9.037082652272657
2.0	-13.818111256741435	-3.470188968598595
2.0	4.880546762223106	-11.274362128029
2.0	11.549651216939877	-3.441238267688067
2.0	5.709724809408586	9.148706712043008
3.0	-0.6190940181326161	6.73761077557331
3.0	-4.313710581694764	4.19473134865784
3.0	3.089290727152823	-16.83004794400267
3.0	1.8435138726745541	5.897705819771535
4.0	-16.849770176831676	0.6685625219471301
4.0	-2.9216694974377106	-9.709889743556275
4.0	12.075774835661099	-1.6804615346667884
4.0	13.366781283533953	3.630443544154258
4.0	11.328890841630978	6.030544232122469
4.0	-17.000007286556613	1.0608009799992135
5.0	-5.280233095941031	-4.208432143749271
5.0	8.440185755225778	1.0013806273083856
5.0	2.657870576819665	7.26212807793603
5.0	-5.817823236104432	-4.0550765614951505
6.0	18.948836539460526	8.065268885167974
6.0	16.74428252441099	9.088429407138054
6.0	-19.148844842385667	-1.5532963584929094
6.0	-16.544274221485853	-15.600401933813128
7.0	-8.248000395021505	-4.873679245652798
7.0	7.431975786523899	-3.2826009708748294
7.0	0.8160246084976194	8.156280216527623
8.0	-0.09802193239109414	1.3367458755237809
8.0	-0.8607504347346038	1.5840443584247461
8.0	-1.1668201499661472	-1.9784404943385987
8.0	2.125592517091845	-0.9423497396099281
9.0	-4.7198701151975255	-11.692641111419444
9.0	10.441009015009156	-18.78324752022957
9.0	5.009745584771109	14.131607049186222
9.0	0.1078308564298389	14.121369741494188
9.0	-10.83871534101252	2.2229118409685786
10.0	2.672001757741341	-1.1191538529270304
10.0	-0.2747433667952985	1.9896564483730819
10.0	-2.3972583909460394	-0.8705025954460507
11.0	0.5221779741982645	-1.5141901271639544
11.0	1.0493408019460848	4.2191207243662525
11.0	-1.5715187761443523	-2.7049305972022886
12.0	9.462589222347201	-19.420091696932754
12.0	13.829706816765436	8.70069446958055
12.0	-23.29229603911264	10.719397227352195
13.0	21.818967455730867	1.4494380585472486
13.0	25.491679768248343	23.552051644698153
13.0	-8.392807796986324	22.232033371468475
13.0	-33.42427148557286	-17.58620687324939
13.0	-23.516342501958743	-23.592290594532052
13.0	18.02277456053871	-6.0550256069324195
14.0	0.26668996405800033	-0.04552857522297703
14.0	-0.1482271183111211	0.15297492043537803
14.0	-0.11846284574685415	-0.1074463452123815
15.0	22.64548386226012	-38.39418347188179
15.0	17.498892038564783	19.670766876818817
15.0	-1.7418575636093585	32.14298726506591
15.0	-22.261415560926984	14.463916386891656
15.0	-16.14110277628858	-27.883487056894605
16.0	14.557990497049396	-2.4149589769168167
16.0	-7.779428495179191	12.078809015175548
16.0	-6.778562001870207	-9.663850038258715
17.0	-9.38305357791564	23.91547705385747
17.0	-12.183719989487043	23.27512803198321
17.0	-1.083061746854977	-22.91873192991056
17.0	22.649835314257672	-24.27187315593011
18.0	-4.675726818777357	-4.505013566057005
18.0	8.553237578937555	-1.0062931068647902
18.0	-3.8775107601602254	5.511306672921787
19.0	-1.57002779064883	-20.86610061542218
19.0	14.983083188301274	0.3426995114242043
19.0	8.53726874758163	23.910743405698515
19.0	-2.263444644046687	16.939904806555322
19.0	-19.686879501187384	-20.32724710825593
20.0	9.810667043916174	-9.80764360886835
20.0	12.128047515586676	-6.289158477608014
20.0	-12.541870374806178	27.145233250272476
20.0	-9.396844184696672	-11.048431163796097
21.0	-10.32652516017814	-0.24148896797404204
21.0	5.1673929712108055	-6.867837214639334
21.0	5.159132188967334	7.109326182613375
22.0	-13.26018545606927	15.676590321453396
22.0	0.5048814299207963	-16.80569558363281
22.0	2.9975689206780425	-17.130506273248162
22.0	12.843448142048855	1.0094192119834424
22.0	-3.085713036578435	17.250192323444114
23.0	9.503156722734946	-12.493495959580246
23.0	14.897595527727562	-5.444407142260784
23.0	-1.199044188843011	18.093230779406845
23.0	-23.201708061619517	-0.1553276775658111
24.0	-13.716809930207782	-6.626351324281849
24.0	4.900204310570205	-14.565536361619104
24.0	5.282956962458438	7.873895944403154
24.0	3.5336486571791554	13.317991741497798
