# Supplementary material
Source: ML conference proceedings conference paper supplement (https://openaccess.thecvf.com/content/CVPR2021/html/Harel_Crossing_Cuts_Polygonal_CVPR_2021_paper.html)
Supplement: Supplementary file 2 [file Harel_Crossing_Cuts_Polygonal_CVPR_2021_supplemental.zip › Dataset/D1/p5/pieces.csv]

piece	x	y
0.0	26.993529964363855	-19.72200331796924
0.0	-0.6801462293717672	21.049131741480252
0.0	-8.947715210801032	20.284031261274997
0.0	-17.365668524191044	-21.61115968478601
1.0	-1.3080703679193624	7.62359892425842
1.0	-13.512601013265899	5.2574623636314115
1.0	-7.225224772332037	-10.339515206601773
1.0	11.835299817108066	-9.71097353088287
1.0	10.210596336409253	7.169427449594827
2.0	-3.2139243357832585	-24.70169688696458
2.0	17.24975755367496	-15.270551591898755
2.0	17.304423498001697	7.782207524511496
2.0	-1.224168331304775	27.316478211138993
2.0	-10.334805314628943	20.04624734134365
2.0	-19.781283069959688	-15.172684598130818
3.0	15.695873129826088	14.622824024563709
3.0	-12.198001121830904	0.9666766592390146
3.0	-15.303134262445552	-6.499853304875288
3.0	-13.767634391714726	-10.702952466264842
3.0	25.5728966461651	1.6133050873373924
4.0	6.529681571834139	-16.8286773578526
4.0	11.647082757984423	-1.6895842487087473
4.0	-6.919855999948243	10.965117137635996
4.0	-11.256908329870322	7.553144468925359
5.0	0.33672012256753464	-3.542042121751582
5.0	1.9230638745942752	0.7259811485382278
5.0	-2.2597839971618354	2.816060973213366
6.0	-13.509818936233934	5.754674041564188
6.0	-16.404788257545434	-1.2269769633681566
6.0	-4.075983738855291	-17.603338193518155
6.0	8.959834278125536	-14.925112616556245
6.0	19.314892675477036	-9.508534482474122
6.0	8.018090974348368	19.14169653459918
6.0	-2.302226995316274	18.367591679753318
7.0	-6.934578133988408	-11.701617105850037
7.0	-4.297283858604328	-11.87583650291527
7.0	7.543843141206439	6.227561356365513
7.0	3.6880188513863277	17.349892252399794
8.0	-10.890653736304717	-5.962540826961661
8.0	15.46732767035446	-11.72148548763292
8.0	-4.576673934049742	17.684026314594565
9.0	4.959429612110411	0.855868590463807
9.0	-2.4106023260278167	5.051579105681701
9.0	-2.5488272860825787	-5.90744769614551
10.0	18.08733943455787	12.113381511234548
10.0	6.608028986230086	19.99950774714476
10.0	-25.419427225730974	-8.093221031928769
10.0	0.7240588049430101	-24.019668226450552
11.0	7.659066129055405	18.72677186069868
11.0	-3.5670490236548744	20.279928270217717
11.0	-3.1700583944149914	-19.445323212513006
11.0	-0.9219587109855419	-19.561376918403415
12.0	-31.567373377020296	3.69252669883815
12.0	13.494813757859799	-16.08807572808024
12.0	25.413426837112752	-7.370468645068354
12.0	14.29676468954084	8.240552952938714
12.0	-21.637631907493116	11.525464721371737
13.0	6.355068054227327	-3.175523757225186
13.0	-2.858255735027965	2.691083163197212
13.0	-3.496812319199355	0.4844405940279706
14.0	-0.9478707948537313	11.65500644001282
14.0	-12.380625503470219	-6.489166412272912
14.0	7.297023142505099	-5.991787340192304
14.0	6.031473155818847	0.8259473124523982
15.0	22.03230194467485	6.217408778692563
15.0	-14.665674960137778	7.071579968185295
15.0	-7.366626984537076	-13.288988746877857
16.0	-6.751679886563514	-0.9512906906564408
16.0	2.221479239758326	-6.386212961018527
16.0	3.9705939317200345	-1.8398976557044737
16.0	0.5596067150851534	9.17740130737944
17.0	-4.567172905828026	0.045220175242037815
17.0	1.711425070457367	-1.1252404981205861
17.0	2.855747835370647	1.0800203228785503
18.0	3.952943190650225	-20.241296503893313
18.0	15.335143085841128	-13.117071786256576
18.0	-3.0192569979290518	21.5614200388803
18.0	-16.268829278562276	11.796948251269631
19.0	16.811206309458143	-1.7313864981475229
19.0	17.711152113746305	0.5108174427734435
19.0	-13.566311565438602	4.726630568540372
19.0	-15.374180077452714	2.651052039151018
19.0	-5.581866780313128	-6.157113552317306
20.0	6.573842044464308	4.212711607868031
20.0	-4.186586619697518	-1.2583623023357418
20.0	-2.3872554247667956	-2.9543493055322925
21.0	4.1308402520271965	-8.486485627392376
21.0	-0.8742761797316239	6.721025865183042
21.0	-3.2565640722955624	1.7654597622093187
22.0	-3.2935681580320435	-7.335750023324809
22.0	0.0987519290220943	-8.766121145913226
22.0	10.866685213263233	8.308740494152458
22.0	-7.671868984253285	7.793130675085578
23.0	-11.526308041059295	-2.5659229131381354
23.0	7.098515732352571	-10.000816834612086
23.0	4.427792308706688	12.566739747750237
24.0	-5.674938151579497	2.6635841485368785
24.0	-9.54527825323229	-9.178252376123918
24.0	9.686004549320694	1.6891211184705324
24.0	5.534211855491088	4.825547109116492
25.0	-15.487141290878196	-6.090520231899541
25.0	3.1356100670969815	-14.543860396029103
25.0	20.675956073196765	-3.7407959047676673
25.0	-8.324424849415545	24.375176532696308
