# Supplementary material
Source: ML conference proceedings conference paper supplement (https://openaccess.thecvf.com/content/CVPR2021/html/Harel_Crossing_Cuts_Polygonal_CVPR_2021_paper.html)
Supplement: Supplementary file 2 [file Harel_Crossing_Cuts_Polygonal_CVPR_2021_supplemental.zip › Dataset/D1/p6/pieces.csv]

piece	x	y
0.0	2.4738474551381584	-2.0738363403284983
0.0	0.2464683968435288	1.259623295640798
0.0	-2.7203158519816792	0.8142130446877064
1.0	-17.937974263923497	6.029299829456715
1.0	2.4183435092427827	-18.735461071412413
1.0	18.6826074576014	-2.2695191522297016
1.0	15.652238762460808	4.189100950045328
1.0	-18.815215465381485	10.786579444140088
2.0	16.288445514448643	10.772322130683563
2.0	-0.02504977612983187	15.570378906669314
2.0	-9.843847516495096	3.049382743819582
2.0	-11.893381111024995	-5.9084556366575205
2.0	0.1871488989496461	-12.849290891721177
2.0	5.286683990251668	-10.634337252793769
3.0	-4.838459312705206	-4.741328399808426
3.0	9.652276433101829	-5.9670686113063365
3.0	11.249938401890141	-2.9742041771721106
3.0	-16.06375552228677	13.682601188286895
4.0	5.0691789053744145	-9.9061547215595
4.0	9.832138245299184	10.46234910678786
4.0	-19.06714829383592	9.691019373802105
4.0	4.16583114316233	-10.24721375903047
5.0	2.2024944247165474	13.884367873699752
5.0	-10.881759293408129	-0.7195517803193466
5.0	3.9461803168996643	-6.846345486889146
5.0	4.733084551791914	-6.318470606491266
6.0	-1.0071692874328946	-7.2557472761265345
6.0	8.334513599156837	2.664803791846511
6.0	-7.327344311723947	4.590943484280029
7.0	-3.802552466106028	0.9946341100470212
7.0	0.47068028598399814	-2.956384811374722
7.0	1.1953790811358325	-2.5132475260193985
7.0	2.136493098986196	4.474998227347095
8.0	4.940307198425795	18.698591267153294
8.0	-7.709543661608904	8.367695658123013
8.0	-5.296419518555376	-45.07471396501667
8.0	8.065655981738477	18.008427039740365
9.0	-2.4427993736780724	-2.6174035126023063
9.0	5.5836148575924724	1.759451444128165
9.0	-3.1408154839144014	0.8579520684741401
10.0	-15.904470500208086	-2.0068725645360903
10.0	-17.52341846253529	-8.692481779178156
10.0	12.232039496482143	-1.1754653356516822
10.0	21.195849466261237	11.874819679365928
11.0	21.922052363445406	7.742276574288266
11.0	15.999203357314352	11.082723616943445
11.0	-25.27413748491854	2.496692451840632
11.0	-26.40922371388693	-4.3152478360926185
11.0	-19.8124874446761	-6.858707840690226
11.0	33.57459292272183	-10.147736966289502
12.0	21.77373409347292	-14.387768443265319
12.0	18.062008679058145	5.431314782758409
12.0	-23.498091924709676	13.58719296069619
12.0	-26.63247714775963	12.134981593576482
12.0	10.294826299938267	-16.765720893765756
13.0	-4.544415145620782	3.8800174444413633
13.0	-4.951323031378838	-1.810545612789784
13.0	9.49573817699962	-2.069471831651565
14.0	-17.35308462053056	-3.677422378752038
14.0	3.6979139929431506	-9.00849463295175
14.0	13.655170627587408	12.685917011703792
15.0	-20.5777222333288	-5.680124342962403
15.0	13.556523247902144	-15.953701868689647
15.0	13.837397458503625	-15.134258447893014
15.0	-1.5047104329634073	17.51662958362658
15.0	-5.311488040113553	19.25145507591851
16.0	-19.198283578751973	-0.03160564079816682
16.0	17.878717310508822	-19.342758405996218
16.0	1.3195662682431548	19.374364046794383
17.0	0.36100236031500005	-0.1062181941789309
17.0	-0.08687356957979887	0.40566767124974257
17.0	-0.2741287907351983	-0.29944947707082004
18.0	-3.029527982138706	-10.081670446955645
18.0	5.956593992929755	-7.002122427877726
18.0	4.801760428611343	13.185888555599613
18.0	-7.728826439402392	3.8979043192337555
19.0	-2.491922911180204	20.086497184702182
19.0	-33.286249204182134	3.407307274667054
19.0	2.596196240606181	-14.368433582427906
19.0	33.18197587475616	-9.12537087694133
20.0	-0.6340521998081562	2.9575858630775294
20.0	-0.9434584718691138	-2.149326893808784
20.0	1.577510671677283	-0.8082589692687384
21.0	-1.8772101205983434	-1.101984488981786
21.0	3.8413212527222953	0.6120048264772477
21.0	-1.9641111321239781	0.4899796625045251
22.0	-10.837549898232062	-3.245561964975044
22.0	-6.803507048104862	-6.720835022817731
22.0	10.674203441782174	4.259662575683212
22.0	6.966853504554755	5.706734412109565
23.0	15.992429767240228	-8.65364335008963
23.0	5.2452432068367845	12.27310790981817
23.0	-3.301935139479466	8.98450812250549
23.0	-13.060035925788329	-1.5919273890163337
23.0	-4.8757019088092	-11.012045293217698
24.0	25.455554314059736	12.581406480842132
24.0	27.349803355633664	19.54992804800664
24.0	-9.639882242174542	34.31503894421949
24.0	-33.49937035508305	-24.589077572628742
24.0	-9.666105072435794	-41.857295900439546
