# Supplementary material
Source: ML conference proceedings conference paper supplement (https://openaccess.thecvf.com/content/CVPR2021/html/Harel_Crossing_Cuts_Polygonal_CVPR_2021_paper.html)
Supplement: Supplementary file 2 [file Harel_Crossing_Cuts_Polygonal_CVPR_2021_supplemental.zip › Dataset/D1/p7/pieces.csv]

piece	x	y
0.0	-0.4110013208729407	-0.03610475246950938
0.0	0.9073481427077863	-0.7299344574146925
0.0	-0.49634682183483275	0.7660392098842274
1.0	4.290442396846695	-10.206703157125045
1.0	14.546938899159908	11.446653970166196
1.0	12.708838578744624	14.17070985001718
1.0	-31.54621987475125	-15.410660663058328
2.0	16.30618061793117	-9.329094596167222
2.0	-4.176441547176177	13.177406948858698
2.0	-12.12973907075501	-3.8483123526914538
3.0	-23.094291535657284	6.034667136130477
3.0	5.473688216623033	-10.307436555262091
3.0	17.620603319034224	4.272769419131614
4.0	-5.773716689421301	3.1690732482031456
4.0	-6.077710530706528	-0.272571278124126
4.0	-0.6578074172529043	-3.624649734369656
4.0	12.509234637380732	0.7281477642906151
5.0	4.033880641575233	1.446697810785984
5.0	-6.199913869191996	0.09397571921107967
5.0	2.16603322761679	-1.5406735299970702
6.0	9.234074531060955	18.433165510900892
6.0	-19.553071897162685	8.692968629212801
6.0	-10.427399650237213	-17.665879137016017
6.0	7.310889241372647	-23.406595986417333
6.0	13.43550777496629	13.946340983319653
7.0	-33.58111755264752	0.22292362930021623
7.0	-3.34453922313188	-17.275749198182343
7.0	26.027035150791477	-13.851309886450698
7.0	28.115332233578314	2.27231791469378
7.0	-17.216710608590418	28.63181754063901
8.0	-14.798141748686042	-10.572982078185932
8.0	38.2215496893157	-0.5641324736496653
8.0	36.58594654571182	6.976315646239946
8.0	6.505664755365344	13.65726567669187
8.0	-32.977792523220614	-4.21638532626924
8.0	-33.53722671848622	-5.280081444826971
9.0	4.282481171958162	19.721207032581688
9.0	-20.946987390938627	16.333647176258168
9.0	-11.292348213049738	-15.12284355608139
9.0	-8.688256713865155	-17.460817537177345
9.0	16.743113633658314	-5.6338382348984375
9.0	19.90199751223699	2.162645119317351
10.0	-5.021949050282632	-11.180041010815161
10.0	10.15504296377195	-4.829168795106361
10.0	-5.133093913489346	16.0092098059215
11.0	-12.787359173363576	-8.897550995436156
11.0	-3.7585541451523063	-7.884004069139024
11.0	5.87765438377639	-2.4840144042615355
11.0	6.44791213024212	-0.15695597420058696
11.0	4.220346804497368	19.422525443037216
12.0	12.641247778772819	6.701395768315306
12.0	-10.315641275164547	17.791161054406604
12.0	-2.3256065036082756	-24.492556822721905
13.0	15.81773372238226	3.977378483853332
13.0	9.409650633484961	7.782127812921878
13.0	-18.459897596455466	1.737080774468212
13.0	-19.363771198650248	-3.944687812723883
13.0	12.59628443923852	-9.551899258519486
14.0	12.191813749384195	8.102371927605768
14.0	-12.465939296844256	17.75048663735512
14.0	-23.043525867479516	2.0670129900411736
14.0	-16.266774947504473	-8.690099730294806
14.0	17.079559042496584	-11.505025252188467
14.0	22.504867319947547	-7.7247465725188125
15.0	-0.05236884262419314	2.1702002358983505
15.0	-2.8216221095437413	0.4196037320644351
15.0	2.8739909521679436	-2.589803967962798
16.0	-1.5487585725350372	-3.0021420697573764
16.0	3.0863173224700513	0.3423369448290203
16.0	-1.537558749935011	2.659805124928354
17.0	6.44916017393705	16.152178324055125
17.0	-12.30471796705802	-4.006973604111922
17.0	5.855557793120969	-12.145204719943209
18.0	15.557446521139145	-11.517349865512806
18.0	14.104395723069542	-3.149461705924288
18.0	6.746560064505261	8.649935251927138
18.0	0.5317880117485424	12.06916467998428
18.0	-18.942241662705325	-0.21983371880646185
18.0	-17.99794865775717	-5.832454641667792
19.0	-16.655371221003154	0.9792579847415722
19.0	-16.371641760352126	-1.001398696433049
19.0	17.263785193533494	-6.703342534188696
19.0	15.76322778782177	6.725483245880155
20.0	-1.616847653461746	1.2623041761796157
20.0	-1.8458582774031271	0.5432711598770738
20.0	1.3593827654957638	-1.8408725103250982
20.0	2.1033231653690567	0.035297174268379555
21.0	-11.61402284836971	22.809693418668765
21.0	-4.667344525292374	-12.33518597415905
21.0	4.209761524527544	-23.645364962157046
21.0	12.071605849134546	13.17085751764732
22.0	5.9573922973929365	3.029723953346822
22.0	-1.825940185423059	4.770938204735887
22.0	-3.045202505212218	-0.8956706893649273
22.0	-1.086249606757676	-6.904991468717805
23.0	-1.138576912930404	-3.6267041470272714
23.0	3.95879004033466	2.0458874686601307
23.0	-2.820213127404266	1.5808166783671362
24.0	-5.949621243975121	1.800097456916421
24.0	5.612564989223642	-4.0104848503014345
24.0	0.3370562547514585	2.210387393385014
25.0	2.8345705123990923	13.389287806297213
25.0	-12.342245350606186	-4.142634575213839
25.0	9.507674838207084	-9.246653231083375
