# Supplementary material
Source: ML conference proceedings conference paper supplement (https://openaccess.thecvf.com/content/CVPR2021/html/Harel_Crossing_Cuts_Polygonal_CVPR_2021_paper.html)
Supplement: Supplementary file 2 [file Harel_Crossing_Cuts_Polygonal_CVPR_2021_supplemental.zip › Dataset/D1/p8/pieces.csv]

piece	x	y
0.0	-18.577673581793274	-0.6366621606983649
0.0	-26.603043775663682	-9.587363438416155
0.0	14.40980672640252	1.4405881768076785
0.0	15.848415344876825	4.29608467584049
0.0	14.9224952861776	4.487352746466327
1.0	-1.2977875955475582	29.928710333983986
1.0	-20.366397506379965	-6.976040309294069
1.0	-7.544464729090824	-27.478125440630766
1.0	16.578205302648545	-17.412427982414236
1.0	12.630444528369795	21.937883398355076
2.0	-0.032989426307238646	-16.036383643571185
2.0	5.500337474208672	-20.514447157434166
2.0	0.3821249171078934	19.07909535612968
2.0	-5.849472965009334	17.471735444875687
3.0	-3.578163274484547	16.072451918880056
3.0	-8.172337111033645	-3.9579969003581414
3.0	-1.9089707534680622	-12.18713307845142
3.0	13.659471138986214	0.07267805992946473
4.0	16.23386848336947	-3.8221122355664026
4.0	20.2706783271491	12.888122823866976
4.0	-19.654499976469054	0.5961186205638582
4.0	-16.85004683404952	-9.66212920886445
5.0	4.744603625407678	8.02521648180749
5.0	0.9519506942101216	8.890140219582594
5.0	-6.41317704278893	-7.83727493059422
5.0	0.7166227231711229	-9.078081770795848
6.0	3.730324186179241	18.868585733701245
6.0	-16.312881123572005	-2.2969504989115417
6.0	-1.9456417953163694	-13.000418451122023
6.0	14.528198732709134	-3.5712167836676825
7.0	0.9528077521454723	-4.924967004074336
7.0	4.395144469519555	4.339405920200696
7.0	-0.895041816020873	3.46366648815344
7.0	-4.452910405644161	-2.8781054042798124
8.0	2.679519364721526	-2.1740134021059463
8.0	0.6032566427598888	3.854419727822047
8.0	-2.878201439857854	1.6427310229110583
8.0	-0.40457456762357846	-3.323137348627149
9.0	-16.13246955402792	4.10091176154359
9.0	3.517623538024918	-8.414949046460437
9.0	12.614846016002996	4.314037284916852
10.0	-8.852510385965033	13.767659778081722
10.0	-12.930151672222054	8.686600195062509
10.0	6.895602619127136	-13.004377383348505
10.0	14.887059439059952	-9.449882589795733
11.0	-3.2693250422396414	-8.346877976640936
11.0	17.53532652804008	-2.2097477284870437
11.0	0.5798443211158207	9.105978222963904
11.0	-14.845845806916259	1.4506474821640762
12.0	-8.733558296180963	6.625862484407636
12.0	-0.866172218526557	-6.787470826935984
12.0	7.878689256410592	-5.629991201789224
12.0	1.721041258296934	5.791599544317543
13.0	25.258350420518404	5.580187995888643
13.0	-12.133789702399236	17.099952564055243
13.0	-13.124560718119161	-22.680140559943865
14.0	-2.8784635317258918	-9.685687502165186
14.0	2.0737554738169455	1.5544862593861954
14.0	2.062475700849777	2.7670277365286093
14.0	0.16513610085439476	3.905808914571456
14.0	-1.4229037437952035	1.4583645916789076
15.0	-14.061311465141701	11.610731147131526
15.0	-6.549478193286334	1.89597793521303
15.0	6.812226713429326	-7.372728187266856
15.0	13.798562944998736	-6.133980895077693
16.0	-1.3834796986034028	3.33148059266905
16.0	-12.939885745519737	3.5196157177419156
16.0	3.7997417827484976	-6.381626118914096
16.0	10.523623661374625	-0.46947019149689156
17.0	3.910833671024198	-8.156114816310252
17.0	10.917075724135191	-0.9478476109275563
17.0	-1.0614072200655977	11.46750475710079
17.0	-13.766502175093835	-2.3635423298629963
18.0	-3.0313311980269835	-14.906225587819314
18.0	7.286158927769993	-13.01218301451853
18.0	2.1512973646205147	9.98256808778342
18.0	-6.406125094363521	17.93584051455443
19.0	-1.1233939546841645	8.176990322241716
19.0	-2.5647064460846005	-18.99016784375566
19.0	3.6881004007687217	10.813177521513946
20.0	-19.488421362489106	-18.973093780209137
20.0	-14.929188309590899	-26.302213433960784
20.0	7.616969285487902	-1.263186211713871
20.0	22.746321010831874	22.38180434581131
20.0	4.054319375760254	24.156689080072507
21.0	7.791312932765195	-11.386817379987402
21.0	0.08345780266444644	17.63600451287218
21.0	-9.047113916312956	8.5832769201754
21.0	1.1723431808833469	-14.832464053060136
22.0	20.50654339463875	-1.2223833355655098
22.0	23.25993613950311	2.5134648670699233
22.0	-24.669592246311016	7.811441505535715
22.0	-19.09688728783085	-9.102523037040127
23.0	-29.848741440704146	7.622505833296412
23.0	-15.800209902784056	-18.21366142896722
23.0	32.03344421154938	-23.982179350075317
23.0	40.01887106613955	-15.598867851409043
23.0	-26.40336393420073	50.17220279715517
24.0	3.6191572996790957	-0.08002248939594035
24.0	4.211463901668991	4.944116633224737
24.0	-7.830621201348093	-4.864094143828782
25.0	-0.43312980980257854	-0.12146484892503244
25.0	0.16127056739361056	-0.07329946532701154
25.0	0.27185924240896786	0.19476431425204396
