# Supplementary material
Source: ML conference proceedings conference paper supplement (https://openaccess.thecvf.com/content/CVPR2021/html/Harel_Crossing_Cuts_Polygonal_CVPR_2021_paper.html)
Supplement: Supplementary file 2 [file Harel_Crossing_Cuts_Polygonal_CVPR_2021_supplemental.zip › Dataset/D1/p9/pieces.csv]

piece	x	y
0.0	-30.452470867711355	8.005759949474031
0.0	-19.161310768734285	-3.8668996410764858
0.0	11.644821126280538	-5.983812721550243
0.0	19.934426469290564	0.2700796048979257
0.0	18.03453404087456	1.5748728082547858
1.0	2.7878695985161914	-23.84730527239606
1.0	19.2973243159537	5.713616526024222
1.0	4.013054157675148	27.348555874379063
1.0	-16.591609753757616	7.952169326716089
1.0	-9.506638318387381	-17.16703645472333
2.0	-1.3548279768116092	0.20061562712422387
2.0	0.3476818604684284	-0.4924503167345449
2.0	1.0071461163431807	0.291834689610321
3.0	15.238355945198407	-8.285616961437972
3.0	15.274061274737829	-7.952599239403943
3.0	-11.911764239938957	13.633680640743185
3.0	-18.600652979997303	2.604535560098738
4.0	-9.141525298466556	6.730687827484869
4.0	-0.9678948283491039	-3.959695879489757
4.0	1.1307558268932745	-4.7991710687083255
4.0	9.435326222503354	-4.928898843166543
4.0	7.320423554441133	-0.10136520874238085
4.0	-7.777085477022073	7.058443172622072
5.0	-0.269218363936391	0.013329569793358356
5.0	0.3973288488963741	-0.2638912562543098
5.0	-0.12811048495995603	0.2505616864609647
6.0	1.9889192545563488	1.5417922636373773
6.0	-1.922716592681117	1.1575012089095806
6.0	-0.06620266187522615	-2.699293472546971
7.0	-4.400810308498242	-2.4105322473477435
7.0	5.530656064350035	-6.1768190842282795
7.0	-1.1298457558517896	8.587351331576036
8.0	17.812128816512633	-14.955181548187817
8.0	20.89600571175437	-14.629196707569472
8.0	27.336098337115853	-5.83465263300219
8.0	-25.231297537630503	29.29658775290954
8.0	-40.81293532775236	6.122443135849936
9.0	-4.672001518681666	10.624640695467406
9.0	-7.50269663139721	9.29514721645517
9.0	-2.847807372834374	-3.385232731734069
9.0	6.964715095778906	-8.338188092303911
9.0	8.057790427134357	-8.196367087884623
10.0	-3.26416285833834	-12.340569929547069
10.0	7.160575586338819	-2.7573467495568655
10.0	5.984002779110276	3.071527470563124
10.0	-9.880415507110797	12.026389208540836
11.0	6.321960737479076	17.270661847999893
11.0	-5.88968392912681	10.235239117342397
11.0	-5.6929177891637766	-20.070712654214745
11.0	5.260640980811513	-7.435188311127532
12.0	5.588084021979818	15.835871975339245
12.0	-0.8507974333359403	15.972858562810455
12.0	-10.123918850742214	-12.107692905079801
12.0	5.386632262098337	-19.701037633069927
13.0	-7.6439524482690855	7.840493976291616
13.0	-10.241583363330756	-4.970668318567385
13.0	9.043557876514447	-4.196460146373304
13.0	8.84197793508544	1.3266344886490558
14.0	12.25364041946828	17.393577220519706
14.0	-4.371163016498093	24.3048461107064
14.0	-12.026468016431338	2.721477939142197
14.0	4.143990613461153	-44.4199012703683
15.0	-28.65346756582954	1.368538849448875
15.0	18.651058740309857	-16.04399048829338
15.0	21.094594756768334	-9.34151495990495
15.0	-11.092185931248647	24.016966598749487
16.0	-15.702176536174614	14.190857515451018
16.0	0.19819301483574095	-29.06928548758399
16.0	20.01438370574196	-5.6254718760831075
16.0	-4.510400184403102	20.503899848216104
17.0	-0.4532757930129345	25.985086929958094
17.0	-17.143286673614384	-0.026852045680301844
17.0	-9.452220690856393	-15.303947951493655
17.0	9.185092559625813	-28.805014711752886
17.0	17.61524336972478	-7.190754920906001
17.0	0.24844722813308795	25.34148269987472
18.0	0.8872573708485272	-0.011951065576158392
18.0	-0.7110215878504922	0.2208544048535382
18.0	-0.1762357829980293	-0.20890333927739332
19.0	1.6799453609636306	4.117610689361809
19.0	-8.371639330232512	3.4192993613350176
19.0	6.691693969268888	-7.536910050696862
20.0	-8.516952909067548	16.64489511331201
20.0	-12.033231025053844	-6.440379230472233
20.0	7.208978133818404	-11.012832976744416
20.0	13.341205800302987	0.8083170939046244
21.0	-1.8899495734656635	6.034065826318838
21.0	-13.724168425614943	-9.09881457686807
21.0	16.322907893778797	-3.6439464452664327
21.0	-0.7087898946981779	6.70869519581566
22.0	-12.858226253875843	-18.873504485523718
22.0	10.395321651071297	9.602494914904927
22.0	9.576050645327978	9.748030518341931
22.0	-7.113146042523438	-0.4770209477231323
23.0	6.318924248670361	23.508401400938244
23.0	-16.414910744790667	6.972074436798498
23.0	-0.535870907441542	-23.919608760147927
23.0	10.631857403561838	-6.560867077588796
24.0	-1.2505853898880093	-1.8307301320320517
24.0	5.553266565551048	1.8501646456475904
24.0	-4.302681175663015	-0.019434513615554625
25.0	6.120001731116721	5.642325733778591
25.0	-17.734818821901932	0.9191797185817783
25.0	2.666591972533919	-9.047573983735505
25.0	8.94822511825129	2.486068531375137
26.0	6.47826489619035	2.693548251046703
26.0	-0.20669412387201522	5.101644829589389
26.0	-6.271570772318389	-7.795193080636075
