# Supplementary material
Source: ML conference proceedings conference paper supplement (https://openaccess.thecvf.com/content/CVPR2021/html/Harel_Crossing_Cuts_Polygonal_CVPR_2021_paper.html)
Supplement: Supplementary file 2 [file Harel_Crossing_Cuts_Polygonal_CVPR_2021_supplemental.zip › Dataset/D2/p0/pieces.csv]

piece	x	y
0.0	-2.7610740107014946	-13.588348193798042
0.0	2.5577082665573414	-17.681171245029073
0.0	29.590207276914505	2.3098417333172256
0.0	-10.875815027811193	22.136386274199502
0.0	-18.51102650495914	6.823291431310383
1.0	-22.062907876196086	-5.614060409048055
1.0	-10.678196938298933	-15.66530620858998
1.0	21.97368302151849	3.3952657063337686
1.0	10.767421792976531	17.88410091130425
2.0	0.7910403609072517	18.48158115763593
2.0	-18.57049154968511	5.7335656501823795
2.0	-1.896413279588279	-11.001068753040672
2.0	10.14354221602661	-9.770831255301433
2.0	9.532322252339522	-3.4432467994762166
3.0	-8.255462443071439	-8.480066583607131
3.0	6.9539567211159365	-5.702470645382215
3.0	7.748938106289001	10.392460692255158
3.0	-6.447432384333523	3.7900765367341602
4.0	-12.900148762216006	-11.445639512352336
4.0	-10.523558274923943	-10.880958855773802
4.0	6.514826593822091	2.2965901006878733
4.0	9.548388572601366	9.201191873720479
4.0	7.360491870716497	10.828816393717762
5.0	17.24270335051596	-1.456699877144788
5.0	14.668470924442692	8.223344241075496
5.0	4.269496803826865	6.6689892876235595
5.0	-15.160904601027262	-2.7406690945607624
5.0	-21.019766477758246	-10.694964556993499
6.0	7.597522595057709	-1.009765146200237
6.0	-2.951910372904939	9.050273869717287
6.0	-4.645612222152771	-8.040508723517043
7.0	-1.1082664017132215	-4.350888535373837
7.0	1.5936679805230325	-5.375757959942249
7.0	4.525714909430266	-5.6833112621452075
7.0	-1.7500430504589324	7.772972090124135
7.0	-3.2610734377811337	7.63698566733718
8.0	19.165872518915172	-3.093349981053389
8.0	16.34501107814173	8.768305810730462
8.0	-21.22248783518751	4.482686853990246
8.0	-14.288395761869403	-10.157642683667321
9.0	-0.2919798039818755	0.310491236517245
9.0	0.10469597024754979	-0.4451545100801944
9.0	0.18728383373432084	0.1346632735629361
10.0	3.031092745938908	-11.67986085148811
10.0	20.30418516831482	13.129680163061149
10.0	18.7251539298089	21.78103957959657
10.0	11.780835732532397	20.742757197579117
10.0	-12.889267168084904	-3.5963107577554814
10.0	-22.320810342739584	-20.03714036449622
10.0	-18.63119006577046	-20.340164966497003
11.0	1.8225983224038695	10.84680229265412
11.0	-15.29936793907493	6.5877780765472105
11.0	-10.516431411082513	-11.227382989092307
11.0	23.993201027753567	-6.20719738010902
12.0	-1.832900170635717	2.2464189813803044
12.0	-2.6958020459012326	-0.9467625856695973
12.0	4.528702216536951	-1.2996563957107086
13.0	4.93019251466525	-2.8851612946209073
13.0	-7.16824079492292	11.809679564022858
13.0	2.2380482802576793	-8.924518269401938
14.0	-10.322750468704708	-10.45707672327079
14.0	0.7039922148735397	-6.64167164174523
14.0	9.618758253831153	17.098748365016014
15.0	2.838643220922514	-1.7789109733923194
15.0	4.88506504725081	-0.8464633509516253
15.0	3.407458328961062	1.0417478787246748
15.0	-4.153606776210842	2.5849608919839753
15.0	-6.278282269223582	1.4143789819969228
15.0	-0.6992775516999434	-2.4157134283616366
16.0	23.789699389335784	-2.3664311044141186
16.0	15.026713023744682	9.771573130206374
16.0	-31.159269054020424	6.847010370420996
16.0	-7.657143359060019	-14.252152396213265
17.0	0.6775245881330095	2.603906521356626
17.0	-0.8848051288348066	-0.40106454853930323
17.0	0.20728054070180546	-2.202841972817296
18.0	-10.025150715576318	2.9318691077120604
18.0	9.251795716407825	-6.258853905504909
18.0	0.7733549991684989	3.326984797792836
19.0	-27.843079638689147	-3.275440636287323
19.0	-2.7076400780502534	-25.620921125524937
19.0	21.813134177369836	-15.623525325256795
19.0	15.490119841311587	24.323289057942134
19.0	-6.752534301942013	20.19659802912695
20.0	-9.664538480995878	-9.289271729306765
20.0	5.424135603594935	-5.574517990442678
20.0	10.311939333219911	13.721043009104735
20.0	-6.071536455818962	1.1427467106447
21.0	-6.917987914581044	23.98235451470126
21.0	-8.546010585046234	21.09393845746382
21.0	5.954277165916261	-23.12807563802472
21.0	6.359693883064435	-22.471316011258875
21.0	3.150027450646594	0.5230986771185062
22.0	4.145903648518461	-15.577664835159053
22.0	0.511484006091226	9.539807328864077
22.0	-4.6573876546096935	6.037857506294974
23.0	5.4713490589241545	-9.286932660931189
23.0	4.788139823073503	5.701987360006546
23.0	-2.4473909812191317	7.679989969785158
23.0	-13.127677064745503	5.288205437169146
23.0	5.315579163966968	-9.383250106029672
24.0	1.3828891465064734	-1.2108970960755467
24.0	1.5213195712456768	-0.8082013470137493
24.0	-2.0171887209184574	1.9912137851928247
24.0	-0.8870199968336744	0.027884657896484102
25.0	-5.649323363551368	16.390062051024206
25.0	-3.9851303610455826	-4.182057638032421
25.0	-3.205849802667278	-5.048365773143698
25.0	12.840303527264245	-7.159638639848073
26.0	-2.4010087156098723	-18.33813142992595
26.0	5.243001414444624	-11.39436248999369
26.0	6.709684161554016	23.896384602253068
26.0	-5.635792389445374	22.800025418157006
26.0	-3.915884470943358	-16.963916100490458
27.0	13.370885688153317	-10.363569320551294
27.0	6.4298525419020045	9.6428210829657
27.0	-7.126038968612097	7.977813520691744
27.0	-12.674699261443243	-7.257065283106141
28.0	1.9409979925036622	3.26167265826624
28.0	-1.787588407293311	0.6085448925860255
28.0	-0.1534095852103535	-3.87021755085224
29.0	1.5388547768976288	-1.176639059998818
29.0	0.34749035736679806	0.8064015615324892
29.0	-1.8863451342644153	0.3702374984663203
30.0	0.21580873260713257	-9.751048384321454
30.0	3.65215635587435	2.7125263319890984
30.0	2.8813653603642244	7.19726547860832
30.0	-6.749330448845721	-0.1587434262759687
31.0	9.06364661769521	-3.5684330406680784
31.0	-0.8421573907065601	9.036558382705268
31.0	-12.534022519276908	4.551654193847841
31.0	-0.5503113487533567	-4.427197211389919
31.0	4.862844641041587	-5.5925823244951145
32.0	-8.753534654242806	-0.6634830500913363
32.0	10.33573987371191	-6.331379029861369
32.0	7.658177220160371	6.996669069686113
32.0	-9.240382439629457	-0.0018069897334299265
33.0	-3.0501806089925454	-2.3462225693338628
33.0	5.875462653824057	-7.727613809204088
33.0	8.343005797991545	-5.2492844468307585
33.0	0.8462747050842587	7.270859605056787
33.0	-12.014562547907309	8.052261220311923
34.0	4.894223495953591	10.518928565542067
34.0	-3.146525097875515	-0.9483277883208023
34.0	-1.7476983980780818	-9.570600777221237
35.0	-15.408105736963519	1.7904383991330899
35.0	-13.545259036849773	-2.6721150652959706
35.0	-9.643768690752209	-4.756558415276237
35.0	20.276220197036544	-2.090615448313812
35.0	18.32091326752891	7.7288505297529255
36.0	-1.9745436981989293	-1.114675610693273
36.0	3.91378239982063	0.7661247517405635
36.0	-1.9392387016216983	0.34855085895271926
37.0	13.774474364374699	-3.16130749827799
37.0	-10.951224768530896	12.032170336260956
37.0	-2.823249595843797	-8.870862837982987
38.0	-0.34533151341204466	3.595884222652031
38.0	-1.9573101653423381	-6.439317608329211
38.0	2.3026416787543784	2.8434333856771707
39.0	-1.4644900171017767	-12.304589404120803
39.0	3.943187690523316	1.6842468960168377
39.0	-2.4786976734215447	10.62034250810395
40.0	1.1840641477914373	1.5006449281176077
40.0	-0.9281908858513178	-0.8068319103443126
40.0	-0.255873261940117	-0.6938130177732728
41.0	0.5367216912483392	0.7648677326988376
41.0	0.06346247439820067	0.7125648781462232
41.0	-0.6001841656465394	-1.4774326108450766
