# Supplementary material
Source: ML conference proceedings conference paper supplement (https://openaccess.thecvf.com/content/CVPR2021/html/Harel_Crossing_Cuts_Polygonal_CVPR_2021_paper.html)
Supplement: Supplementary file 2 [file Harel_Crossing_Cuts_Polygonal_CVPR_2021_supplemental.zip › Dataset/D2/p1/pieces.csv]

piece	x	y
0.0	-38.89092490236168	16.705099158259568
0.0	6.256795222316585	-14.084067262450523
0.0	13.479505162759114	-11.308560685179183
0.0	19.154624517285967	8.687528789370141
1.0	3.606896265716416	9.949540434527655
1.0	-5.993652101594282	15.647503916561158
1.0	-7.714859855475169	6.507514048082913
1.0	-5.39406121266992	-14.359728729949042
1.0	7.822778355790997	-9.572155793413971
1.0	7.6728985482319425	-8.172673875808712
2.0	-5.598023099238709	-13.772279102166975
2.0	26.331826424402337	12.625308610653214
2.0	-9.743553054827998	9.229517173491441
2.0	-10.990250270335622	-8.082546681977686
3.0	5.416610579588877	0.5638008681775865
3.0	-4.355474458817044	12.639243109785983
3.0	-14.858729565287009	11.093272661734726
3.0	4.707219786543514	-14.884361191526656
3.0	9.090373657971677	-9.411955448171634
4.0	-8.575613074148139	2.6194727668042255
4.0	1.322904515929456	-5.289889281546878
4.0	9.691869369865888	-2.557673057055672
4.0	-2.4391608116472114	5.228089571798336
5.0	-27.893547974252417	9.702247617121472
5.0	-2.0040292214222233	-15.938681371375939
5.0	13.90099667730029	-18.68859932331757
5.0	20.38463233251288	-8.635184410652204
5.0	9.743408195022466	13.713836502743955
5.0	-14.131460009161021	19.84638098548026
6.0	0.6152560991577476	3.2024337857703262
6.0	-1.3702727823836438	-2.3469579892313934
6.0	0.7550166832258767	-0.8554757965389373
7.0	1.0403483043310173	-3.6503384950657556
7.0	1.9988509705305009	4.360250248906759
7.0	-3.0391992748615304	-0.7099117538409877
8.0	-3.8371352332872988	0.43648075064678465
8.0	1.6594092052002076	-4.783211014524796
8.0	4.727140567403875	-4.194686699729324
8.0	-2.5494145393167678	8.541416963607318
9.0	1.5903872855071608	1.5494048705269095
9.0	-1.2817693902955565	2.687265161494235
9.0	-0.30861789521159877	-4.236670032021131
10.0	-19.902129928755247	-23.59723449364482
10.0	-3.9977091652888674	-29.72439331142875
10.0	14.635809461407527	17.68358964424958
10.0	11.12980952432901	21.55708883784676
10.0	-1.8657798916924246	14.080949322977261
11.0	11.032647178033505	2.5045992102351162
11.0	-11.283106444210738	-1.4369278546244346
11.0	-11.902384043900659	-2.2247578633896197
11.0	12.152843310077918	1.1570865077789263
12.0	-26.034284077919818	8.841855069640221
12.0	-31.342086121283387	-4.00178104530865
12.0	12.314508932708296	-22.438025772268585
12.0	25.76646279817936	-0.24553133066291188
12.0	19.295398468315522	17.843483078599917
13.0	-10.363238916670094	18.89419398327493
13.0	-0.8371852901658217	-14.636008208016348
13.0	2.3595416576011488	-15.57091340168459
13.0	8.84088254923476	11.312727626425993
14.0	4.142698114566947	-4.68811162495791
14.0	-7.449247525759235	9.406465779425291
14.0	3.3065494111922873	-4.718354154467381
15.0	-6.259453625778311	-14.006993344455129
15.0	24.93656324106083	-5.259640937242127
15.0	23.473763449895227	28.994459562968782
15.0	-20.490554127914855	-3.48539055781912
15.0	-21.660318937262883	-6.242434723452399
16.0	0.6942235678637099	-10.173247174976371
16.0	9.22749830083117	-11.987375315481954
16.0	-0.18573985069309487	14.039683913183653
16.0	-5.040069166354029	7.2334557020094605
16.0	-4.695912851647767	0.8874828752652129
17.0	18.22584779630266	6.138094327418787
17.0	-14.306497397173448	8.705803627153355
17.0	-24.33350707103375	-7.043294856843851
17.0	20.414156671904532	-7.8006030977283
18.0	-1.7172343387010311	2.23228126480725
18.0	-4.1427561842227645	0.37966107184099174
18.0	5.859990522923771	-2.611942336648227
19.0	-13.109989766128523	-0.2378243420836111
19.0	9.171378322946955	-4.258113990411734
19.0	8.358720754060215	-1.8490327009462122
19.0	-4.420109310878627	6.344971033441537
20.0	0.1642266987621102	7.4043152171022255
20.0	-12.757660143647058	-6.222651901297816
20.0	11.556372460276384	-7.864908124710809
20.0	1.0370609846085643	6.683244808906406
21.0	-2.631428484319615	8.061272285015841
21.0	-6.380302884242198	1.5583308392381863
21.0	-4.358425574400829	-9.741489120528739
21.0	7.298362546366376	-5.273997582605949
21.0	6.071794396596279	5.395883578880665
22.0	13.15486575866126	-10.64573910899366
22.0	24.012372051352806	-2.2387019458642032
22.0	-9.169582245390384	8.80299172409726
22.0	-14.79855219519196	5.1226274821093964
22.0	-13.199103369431747	-1.0411781513487695
23.0	-0.699222431758236	2.8789717341212357
23.0	-1.6442860219196973	-6.147456526644197
23.0	2.3435084536779462	3.2684847925229548
24.0	-1.5844207931069243	3.1122455544842427
24.0	-2.5609589004933913	-3.4657183926140087
24.0	4.145379693600336	0.35347283812976993
25.0	4.336466782299264	-4.4855647392866365
25.0	5.715944048532569	-3.8130110041490037
25.0	-2.125822601609507	5.701252263298379
25.0	-7.9265882292223395	2.5973234801372707
26.0	-3.5706463868324323	-0.16945699992048635
26.0	-4.268488126997135	-2.9929777811419926
26.0	6.6039383337522395	1.5894645355233097
26.0	1.2351961800773688	1.5729702455391539
27.0	2.221302564533189	13.503795662608413
27.0	-3.483611108017658	15.838702994081956
27.0	-7.947879958185769	11.013229399199119
27.0	0.7923269604795254	-22.321673097188107
27.0	3.51895302591559	-20.83453836562397
27.0	4.898908515275159	2.800483406922586
28.0	-0.298290579158227	-0.1303161415659694
28.0	-0.2967775614709582	-0.17304451784449126
28.0	0.5950681406291922	0.3033606594104599
29.0	-16.647481119746367	-14.696770696199419
29.0	-16.36554474750549	-16.843014527188732
29.0	16.493003648151596	15.725332591245307
29.0	16.52002221910027	15.81445263214281
30.0	-9.390671564349264	-2.919280295891134
30.0	5.588930365002991	-3.080794804202953
30.0	3.801741199346285	6.00007510009406
31.0	-5.611106494520966	2.2157326537776756
31.0	7.002999133768232	-6.3175587297828555
31.0	-1.3918926392472717	4.101826076005176
32.0	8.087048346362913	-2.7286597553390117
32.0	0.15485354623813352	11.497655643995003
32.0	-8.241901892601046	-8.768995888655992
33.0	-6.295755666090386	-1.7665740407641328
33.0	-0.13675733213913857	-5.921596865702866
33.0	12.531377933997355	-0.628654471374353
33.0	1.9322942033805295	6.701631256427809
33.0	-8.031159139148352	1.6151941214135466
34.0	-3.434624435068427	0.29905045545103365
34.0	0.36866635038976986	-7.440703338669221
34.0	6.8031434736728515	2.5772522155392124
34.0	-3.73718538899419	4.564400667679017
35.0	8.825226695778758	1.4386931635952613
35.0	7.6530959697134735	10.42580639034586
35.0	-22.533716503552046	0.12409602318451159
35.0	6.05539383805982	-11.988595577125635
36.0	9.662301288230648	-0.6937904847853431
36.0	4.664572191189264	15.22511019285339
36.0	-9.23264077452607	-6.294851083289523
36.0	-5.094232704893834	-8.236468624778542
37.0	-2.67038149333123	3.122535539068386
37.0	-0.616045205623973	-3.8596810393370724
37.0	3.286426698955203	0.7371455002686866
38.0	6.644377771917771	6.257257370077829
38.0	-0.1995025238444998	6.801458113068121
38.0	-6.444875248073256	-13.058715483145955
39.0	-1.0011969007800134	0.642647066230386
39.0	-0.762118022110227	-3.6607301834709673
39.0	0.8658575065006938	-2.743530726565383
39.0	0.8974574163895814	5.761613843805993
40.0	-0.31423632148154157	-1.862428491822705
40.0	1.5108924112548552	2.4502476905078643
40.0	-1.1966560897733274	-0.5878191986851645
41.0	3.287113943837217	5.441066077012482
41.0	1.8573973397556383	7.771553141473249
41.0	-3.5598557565747195	-5.254597123136249
41.0	-1.5846555270181337	-7.9580220953494845
