# Supplementary material
Source: ML conference proceedings conference paper supplement (https://openaccess.thecvf.com/content/CVPR2021/html/Harel_Crossing_Cuts_Polygonal_CVPR_2021_paper.html)
Supplement: Supplementary file 2 [file Harel_Crossing_Cuts_Polygonal_CVPR_2021_supplemental.zip › Dataset/D2/p2/pieces.csv]

piece	x	y
0.0	7.920480585766503	1.4891844881673397
0.0	-8.851795088193773	5.671809481213597
0.0	-7.801514325880876	-2.1262390974121845
0.0	8.732828828308143	-5.03475487196876
1.0	11.167952916818354	-1.4552785464936517
1.0	-1.2925751667343652	9.10239187686928
1.0	-7.765049771244672	4.1313468347036295
1.0	-2.11032797883932	-11.77846016507926
2.0	11.696713601172295	17.981878363876575
2.0	10.66346261046013	18.685728560861133
2.0	-12.573017253652663	23.05606505349331
2.0	-23.156711382929082	-10.54249061329224
2.0	-3.1549374398381738	-27.985650842606336
2.0	16.524489864787473	-21.195530522332426
3.0	2.4634808318101107	-26.376097408541085
3.0	4.2770064045821945	-27.294944972834983
3.0	1.1433160185903997	12.896919821383335
3.0	-3.735972696148745	20.532818860885396
3.0	-4.1478305588339826	20.241303699107355
4.0	3.8916723119754075	4.902812145179678
4.0	-10.029474855673126	-2.1677239969309703
4.0	6.137802543697723	-2.7350881482486993
5.0	1.00057574214999	20.103792820364806
5.0	-2.093834536056932	20.145477603434315
5.0	-3.4221200689995706	-18.650619686009335
5.0	4.515378862906469	-21.59865073778982
6.0	-5.285870841528012	2.413486883410058
6.0	5.4831874010195625	-9.429421098347916
6.0	-0.19731655949155044	7.015934214937861
7.0	-0.42517251645723037	5.803782629378979
7.0	-1.1833439237205094	-2.2135399611450386
7.0	-0.7713177317724785	-3.076282743412318
7.0	2.3798341719502103	-0.5139599248216166
8.0	-0.16884355177021118	0.22220146151798004
8.0	-0.05695476167108154	-0.6298899926508748
8.0	0.2257983134412998	0.4076885311328949
9.0	0.009047571140747555	-0.014188926928267526
9.0	0.013640522606092033	0.0019133443174697037
9.0	-0.022688093746839586	0.012275582610797822
10.0	-14.612901083120798	7.935794417202903
10.0	12.794586431532602	-14.916631438656733
10.0	1.818314651588197	6.980837021453848
11.0	19.443131401873433	-7.907867225089659
11.0	9.866313230797925	1.6677976167399173
11.0	-17.90947218791754	6.184889573130958
11.0	-11.39997244475382	0.05518003521877361
12.0	1.9851038899812414	0.6323153685390158
12.0	-1.4649654440055615	1.3663089689796124
12.0	-0.5201384459756909	-1.998624337518637
13.0	12.767930859564325	-6.182591182624923
13.0	8.492232910225049	14.184708036737641
13.0	-9.84149356426873	-2.1075102431492585
13.0	-11.418670205520668	-5.894606610963474
14.0	12.010935673351415	27.522073439940637
14.0	-11.712330959871617	-4.900492823566621
14.0	-10.34744948730523	-8.39514459757409
14.0	2.5678250006186016	-10.254565018518381
14.0	7.481019773206837	-3.97187100028157
15.0	-1.65117235134621	-4.653228736447989
15.0	10.115463714165045	-0.5727642080010014
15.0	-2.094787723743743	4.589266845885538
15.0	-6.369503639075093	0.6367260985634591
16.0	-20.635883002008804	9.237508541182851
16.0	-3.2226477199695602	-8.095898238933957
16.0	0.06867238282718971	-8.140672027284678
16.0	23.789858339151184	6.999061725035792
17.0	-3.6661800667110476	-2.453027187130842
17.0	3.240569689902639	0.09516747270369746
17.0	0.42561037680842384	2.357859714427149
18.0	-19.36823541102905	4.145750557563833
18.0	1.9682656019357783	-8.23014716836108
18.0	14.142753471803365	-5.627224338475705
18.0	3.2572163372899023	9.711620949272943
19.0	9.771580262039276	1.9598333509394918
19.0	-13.626207337742734	0.21084182646996769
19.0	-5.896604790339418	-2.532621565818165
19.0	9.751231866042874	0.3619463884086983
20.0	-7.862003514712277	1.711980684597046
20.0	7.542655688314568	-2.764628534368282
20.0	8.211178641235836	-1.0448710426363161
20.0	-7.891830814838131	2.0975188924075465
21.0	23.072859949463545	3.720391840873509
21.0	20.985370682652256	9.117205681026448
21.0	-13.629500118208348	17.710959357349104
21.0	-24.482224238285532	-4.104510551809574
21.0	-5.9465062756219425	-26.444046327439516
22.0	9.870677182948796	-6.190656067475129
22.0	13.932732777852234	10.618685668881028
22.0	-13.25795007929153	5.389735798200865
22.0	-10.545459881509485	-9.81776539960676
23.0	9.33121304741376	-10.425510076488727
23.0	11.261289747716217	-4.03030628781467
23.0	-2.128242170530458	5.0777899386630585
23.0	-9.347424500583667	5.668820294518524
23.0	-9.116836124015839	3.7092061311218023
24.0	2.5394358675705413	3.909668893071457
24.0	1.1624987130142732	3.9097318734616575
24.0	-2.304883258849458	-3.8801347689648433
24.0	-1.3970513217353706	-3.93926599756827
25.0	-5.5291600594253305	14.529745171639293
25.0	-10.319823949131242	-5.453578237741783
25.0	0.25846264078866193	-7.916198842988592
25.0	15.590521367767908	-1.159968090908902
26.0	-2.46604943164522	-1.645787201408198
26.0	2.842292103876223	0.1479999753097647
26.0	1.514908612399454	1.324344500177191
26.0	-1.8911512846304925	0.1734427259212416
27.0	-15.57185500364818	8.941158414522075
27.0	-15.021662350308837	-7.056330797318672
27.0	11.336931153421823	-8.633984163988886
27.0	19.2565862005352	6.74915654678548
28.0	-6.6595377066532695	-28.872615830932688
28.0	34.03263917329066	17.83890036186381
28.0	21.22972261828649	21.84121522980298
28.0	-19.68462309588811	2.794847241586946
28.0	-28.91820098903578	-13.602347002321045
29.0	-1.727138458541695	0.23152280755697924
29.0	1.209205948019827	-0.8266410437440248
29.0	0.517932510521882	0.5951182361870385
30.0	7.426717824835943	-12.792771769351017
30.0	13.11436463859325	-2.1038318841860537
30.0	-5.656455267196222	13.230490230675011
30.0	-14.884627196232966	1.6661134228620573
31.0	4.587832909743841	-1.1189504351704196
31.0	1.3424307753340454	7.075630685376666
31.0	-8.24281902559861	-1.9847318840352428
31.0	2.31255534052071	-3.9719483661709782
32.0	-5.815278308173435	5.269094309812738
32.0	-0.651636211192341	-12.648657170484762
32.0	3.8988894828967253	0.4160348067007961
32.0	2.5680250364690433	6.963528053971185
33.0	6.8124815357764685	-16.928243227199168
33.0	10.261726645539852	1.620186907240872
33.0	-4.443786553025765	11.566553011395063
33.0	-4.704256091691807	11.57985831788527
33.0	-7.9261655365987504	-7.83835500932204
34.0	-3.605377170762768	-3.25223961543657
34.0	7.478233335025558	-2.916511760774729
34.0	0.5471947601662696	7.810550966686537
34.0	-4.420050924429056	-1.641799590475213
35.0	-3.5797791447511975	5.472266314313954
35.0	-3.0905802277409014	-5.2367944070367916
35.0	0.7576549862863851	-5.090188547879105
35.0	5.912704386205713	4.8547166406019295
36.0	6.885824547670826	4.207519144497289
36.0	-5.1606323425333125	4.768183527087114
36.0	-6.2060081328287415	-3.7183680062572217
36.0	4.480815927691187	-5.257334665327174
37.0	-0.3890028572708825	2.8924187271349986
37.0	-5.4955331319295215	-4.527245929886208
37.0	2.3954329754348254	-0.3207414518611529
37.0	3.4891030137655767	1.955568654612382
38.0	-12.083594177041972	-15.011368405110286
38.0	22.70694318420631	-8.956534427579124
38.0	-10.623349007164324	23.967902832689393
