# Supplementary material
Source: ML conference proceedings conference paper supplement (https://openaccess.thecvf.com/content/CVPR2021/html/Harel_Crossing_Cuts_Polygonal_CVPR_2021_paper.html)
Supplement: Supplementary file 2 [file Harel_Crossing_Cuts_Polygonal_CVPR_2021_supplemental.zip › Dataset/D2/p3/pieces.csv]

piece	x	y
0.0	0.557540798298858	4.28642594160727
0.0	-8.041292190378764	-1.586147719193906
0.0	7.483751392079913	-2.7002782224133717
1.0	-5.022493212527984	3.488169244976282
1.0	-2.4021656159188742	-4.626457996002964
1.0	7.424658828446865	1.1382887510267068
2.0	-6.844842425222903	-13.417282473307658
2.0	8.603623884490307	2.2728354108060733
2.0	-1.7587814592674038	11.144447062501582
3.0	4.377310144502791	-9.631780649624242
3.0	9.227215832460276	-5.458989433948378
3.0	-5.42883770293238	13.694868375807422
3.0	-10.222881594389985	10.114486304125107
3.0	2.047193320359303	-8.718584596359921
4.0	-17.564717734254902	-3.1568052372843702
4.0	-18.105570214922373	-6.286653234852528
4.0	11.651433347934644	-3.1192600870186697
4.0	13.515336905433484	3.397630922552086
4.0	10.503517695809146	9.165087636603497
5.0	4.524403538152939	14.35002534210569
5.0	-6.271931555493178	-6.926397531261312
5.0	-6.177423227997382	-7.001967849434878
5.0	7.924951245337626	-0.42165996140949374
6.0	3.4385717663438213	0.9143172713343146
6.0	2.944064276491356	2.144656251676393
6.0	-4.270747497358324	0.8958440892310335
6.0	-2.1118885454768606	-3.954817612241741
7.0	-26.40544083388329	1.3510891893294423
7.0	-17.6384561690772	-22.442030709626213
7.0	1.030551156697887	-22.42597404893127
7.0	24.237027081704753	16.901561509826717
7.0	18.776318764557836	26.615354059401295
8.0	12.887188960338188	1.794929059710888
8.0	-8.861403505078002	7.997505863900663
8.0	-4.025785455260191	-9.792434923611545
9.0	19.54244519944906	1.080637694149604
9.0	-18.506639147208848	8.404706536677011
9.0	-19.466281911888405	7.989139606369947
9.0	18.43047585964822	-17.47448383719658
10.0	-16.78623596887444	-3.254749025200561
10.0	0.623184008687926	-29.261898925335554
10.0	24.101294872673712	-13.58912471708416
10.0	-2.568967586667967	22.938774297056376
10.0	-5.369275325819229	23.16699837056391
11.0	3.895436549907468	1.3231086633617395
11.0	-1.4170101026609863	2.35448598243029
11.0	-2.478426447246457	-3.677594645792033
12.0	-1.6997993005941148	5.506271674223891
12.0	-3.514907429956875	-7.4602253476499945
12.0	1.0290539373224832	-3.5542099904358144
12.0	4.185652793228512	5.508163663861938
13.0	-4.5225835640167835	-2.9142030096326814
13.0	0.7706562680671548	-1.525123653546169
13.0	2.201677426138813	2.1743019680767963
13.0	1.5502498698107765	2.2650246951020696
14.0	-6.840003398732008	16.046439996153822
14.0	-3.1383763308542556	-13.763505239322859
14.0	4.216661592286091	-14.919750205965011
14.0	5.761718137300172	12.636815449134046
15.0	0.5421132407516134	-2.5019159783021676
15.0	1.5649720238013924	6.6734858109003055
15.0	-2.1070852645530143	-4.17156983259815
16.0	16.908326946147653	23.211121592932116
16.0	-20.854041090917086	-11.926428067851695
16.0	-22.607401909203986	-21.110397509478855
16.0	-20.118984241704055	-28.69887442864238
16.0	22.75964197935794	16.955060475640323
16.0	23.912458316319494	21.569517937400448
17.0	-0.17500225335469063	1.429514444332264
17.0	-0.7820338361358296	0.9404088139950739
17.0	0.4247184593174762	-1.2061591911749343
17.0	0.5323176301730334	-1.1637640671524034
18.0	11.196789268929397	-12.03994288331963
18.0	14.987229109524257	-6.426882065348807
18.0	-0.4973406363327817	15.122927245858547
18.0	-13.428077498468335	18.020582461097696
18.0	-15.210833645635454	-0.6462179918570301
18.0	2.952233401982905	-14.030466766430779
19.0	2.628499947978258	-2.515948294682043
19.0	1.8312261486653452	3.4776280022463166
19.0	-4.431965747052847	2.4834609095249256
19.0	-0.02776034959075399	-3.445140617089199
20.0	1.29886487506691	-7.655849370832677
20.0	11.339259175061958	-10.014596829072401
20.0	11.568300565829075	-6.840353635846279
20.0	-10.969817971506897	12.865117805147785
20.0	-13.236606644451047	11.645682030603574
21.0	-8.044039918805163	0.019835706033444
21.0	-2.6866214792982315	-2.205846180864729
21.0	10.730661398103397	2.186010474831301
22.0	3.1239058902567938	-0.45189131002729976
22.0	-1.7952035578622412	1.415721288966869
22.0	-1.3287023323945495	-0.9638299789395709
23.0	-5.672379584880828	-6.437207569411082
23.0	4.908721731218589	-2.08190515433527
23.0	16.29160242131898	5.929412441869934
23.0	-9.591453729694567	8.879254360389021
23.0	-5.936490837962186	-6.289554078512638
24.0	-13.252638652380925	-17.740159522119797
24.0	12.000521238060278	-16.346407225692026
24.0	4.321515603669971	17.630819116405405
24.0	-3.069398189349282	16.455747631406428
25.0	6.3946494880880715	0.7070989779587101
25.0	-0.08829517750823289	3.1558641883602596
25.0	-6.306354310579883	-3.8629631663189543
26.0	-3.247821813501788	-27.36141623269619
26.0	18.8592187314268	12.079765902565658
26.0	6.195324167151156	19.863846701827235
26.0	-5.14468752499386	13.589448616426225
26.0	-9.888911204413096	0.4879547247335776
26.0	-6.773122355669206	-18.659599712856533
27.0	-13.284100769460755	8.377711867644267
27.0	-0.38748634363410617	-13.824969359596372
27.0	0.3279916624911207	-13.850473004657697
27.0	12.122703169193748	-3.044693533419138
27.0	14.296934744284963	11.956909381322886
27.0	-13.076042462874968	10.385514648706055
28.0	14.200919562416919	12.18953808879209
28.0	-17.69548522378604	3.347611021550588
28.0	3.4945656613691156	-15.537149110342678
29.0	10.551449262002027	18.274312647632602
29.0	-9.130207353937823	11.878623449436207
29.0	-10.447266076514262	-23.598157825938046
29.0	-6.1280378977781815	-21.727042287028908
29.0	15.154062066228278	15.172264015898165
30.0	-8.894461317567883	5.727489173352182
30.0	-7.373958570036501	-1.0501867356961951
30.0	2.1314848795592694	-7.838109183154418
30.0	14.136935008045104	3.160806745498402
31.0	0.00982888579266148	-0.0019983603441306296
31.0	0.0010027804530983436	0.008003923500908854
31.0	-0.010831666245781434	-0.006005563156777946
32.0	1.1740146840937236	-0.3010258020548902
32.0	-0.3305067540917175	0.5822290361057456
32.0	-0.8435079300020069	-0.28120323405085695
33.0	-12.969383565366885	-9.857672033891449
33.0	-7.774884412453002	-12.909502274870594
33.0	10.240442697682084	2.1690338156255
33.0	10.50382528013783	20.598140493136533
34.0	3.3253949276438863	2.3446196896420264
34.0	-3.169761010135105	-0.40758775277028786
34.0	-2.881080512101598	-1.2105906653514766
34.0	2.7254465945928144	-0.7264412715202688
35.0	12.46438394950725	12.811042391017347
35.0	-29.38251851000742	4.774169673514096
35.0	16.91813456050015	-17.585212064531436
36.0	1.03807462068474	0.37411400773481757
36.0	-1.1027473862948862	1.0231767983577216
36.0	-1.0394374095226249	-1.6033291568122823
36.0	1.1041101751327655	0.20603835071973883
37.0	3.794979052206362	-1.434323945364504
37.0	-1.1242483208933864	2.9013841070038398
37.0	-2.6707307313129696	-1.4670601616393397
38.0	9.151548072797489	0.640993662946485
38.0	-2.2735418544837263	10.845693898698494
38.0	-5.531876276183588	-4.4375433744945525
38.0	-1.3461299421301725	-7.049144187150424
39.0	1.8660187132524915	-5.212721122128627
39.0	4.411390687405993	1.9133880598346047
39.0	-3.9014991993269192	4.319370202114579
39.0	-2.3759102013315605	-1.020037139820528
40.0	-1.123938390142841	1.4744415180636838
40.0	-2.3241826519584157	-4.150671443663633
40.0	3.448121042101297	2.676229925599962
