# Supplementary material
Source: ML conference proceedings conference paper supplement (https://openaccess.thecvf.com/content/CVPR2021/html/Harel_Crossing_Cuts_Polygonal_CVPR_2021_paper.html)
Supplement: Supplementary file 2 [file Harel_Crossing_Cuts_Polygonal_CVPR_2021_supplemental.zip › Dataset/D2/p4/pieces.csv]

piece	x	y
0.0	-22.465995618682395	6.686457590315182
0.0	19.433766993390478	-12.597312855645168
0.0	3.0322286252919213	5.910855265329986
1.0	-0.8184180280635392	-1.1182669985067295
1.0	2.2488643889503988	0.5967299908082991
1.0	-1.4304463608868623	0.5215370076984323
2.0	2.508615818583897	5.884517953866828
2.0	-12.453315258216538	-0.5995980575218309
2.0	-12.116280397152355	-1.5618707664345433
2.0	7.8673872788303765	-6.087606537591016
2.0	14.193592557954661	2.3645574076805818
3.0	6.328412444105757	21.928280334081414
3.0	-18.171240816664408	-3.7011474869835412
3.0	3.947775086208734	-14.348354093731137
3.0	7.895053286349909	-3.8787787533667033
4.0	-14.618984181771594	19.762003381282916
4.0	-17.735067838925996	17.60946093720966
4.0	-4.306192687271964	-15.383790661494201
4.0	6.908908615254987	-21.36892132528915
4.0	22.943242208846296	-20.796642037215967
4.0	6.808093883868282	20.177889705506733
5.0	0.4156932338930404	0.3390894445904791
5.0	-1.1508184515608566	-0.14039610113596615
5.0	0.7351252176678265	-0.19869334345452308
6.0	-11.270077720130276	14.62299118328913
6.0	-14.25705295645233	-2.4109160412334356
6.0	-3.994713672121534	-16.20517566149074
6.0	-1.2654472445898581	-15.480311712395007
6.0	8.853502857486236	-9.454198173238737
6.0	12.646388095560775	13.483651788890917
6.0	9.28740064024703	15.443958616177879
7.0	2.061984194266283	-13.151863099140968
7.0	8.388517792719874	-2.315009850023118
7.0	7.278228372948032	-0.6567219239371043
7.0	-17.728730359934186	16.123594873101204
8.0	-1.8046414564229512	-1.9000240521977834
8.0	2.7497444342045507	0.37489798107679556
8.0	2.145139378991952	0.9639600565940525
8.0	-3.0902423567735418	0.5611660145269243
9.0	-0.7643705765485683	0.8874340221518281
9.0	0.3353435426889827	-2.113268467748348
9.0	0.42902703385958774	1.22583444559654
10.0	6.404366729191874	5.9380027117876475
10.0	-2.556566299946325	7.936136876656365
10.0	-8.262428550851748	-6.543821573438012
10.0	-2.141604574325656	-12.996997321302192
10.0	6.556232695931835	5.666679306296178
11.0	6.294240116682978	3.473224114952323
11.0	-7.7315435562091155	1.3913752480851993
11.0	-9.130030276938054	-4.568130902462956
11.0	10.567333716464182	-0.296468460574578
12.0	-0.8648813156920613	-9.08488755416137
12.0	8.353851638265374	-1.89214406279917
12.0	-7.488970322573293	10.977031616960547
13.0	1.8884429571425199	-4.739608805869455
13.0	5.683590840125554	3.5048024149844665
13.0	-7.572033797268074	1.2348063908849891
14.0	-0.36121695992650726	-3.413397231184298
14.0	1.6632463202853587	-1.8640113702533938
14.0	-0.41107692693074144	2.8679150749983062
14.0	-0.8909524334281101	2.4094935264393857
15.0	-12.147773751053167	-33.91542212558486
15.0	-9.501437703844765	-32.721049224981265
15.0	20.105755335635397	3.653033428998248
15.0	23.703018298604917	15.896656744297893
15.0	2.6666722052725884	37.02597204238746
15.0	-24.826234384615013	10.060809134882568
16.0	-7.330731578196044	3.488936618958621
16.0	6.115698329383176	-8.276096506231735
16.0	12.628216144012374	-7.62059962816654
16.0	-4.849631995288203	5.930012860166768
16.0	-6.5635508999113075	6.47774665527285
17.0	7.684735512221024	0.6087948672397614
17.0	7.538190011625879	1.264762497239293
17.0	-6.351361554969787	1.4128263217607597
17.0	-8.871563968877116	-3.286383686239814
18.0	-10.862840678200913	-7.035601491832702
18.0	9.392137267020136	-7.1686583676431
18.0	1.4707034111807773	14.204259859475801
19.0	-1.333552277320385	18.60764366921237
19.0	-18.862282382612953	-12.600973416943793
19.0	-14.99616692792077	-24.343114583182746
19.0	19.432332181447855	3.2040379315810728
19.0	15.759669406406244	15.132406399333155
20.0	7.237611650419402	1.221044117102219
20.0	-4.1567650652774315	3.45932396820958
20.0	-9.85072836939724	-0.03280945094298953
20.0	6.769881784255274	-4.647558634368816
21.0	2.065871657379495	0.9595068205528088
21.0	-0.7427789338505189	0.4547968893563394
21.0	-0.793397733083841	-0.6742816463798569
21.0	-0.5296949904451312	-0.740022063529266
22.0	6.891512535410755	3.9688924683881233
22.0	-2.0122831513952684	5.534323736645173
22.0	-9.915848095015102	-1.4716505370344652
22.0	5.03661871099963	-8.031565667998832
23.0	-1.5587543606041467	8.663523101605232
23.0	-7.563301086550828	-3.5892188101342017
23.0	9.12205544715497	-5.074304291471044
24.0	-23.949616366248797	5.323543502389011
24.0	18.567480234878953	-10.673692096943693
24.0	22.980915267268493	-6.3066788960006255
24.0	-17.598779135898653	11.65682749055531
25.0	-2.4751056189461678	-4.4642713540004495
25.0	6.280607641844146	4.345918365035548
25.0	-3.8055020228979726	0.11835298896488135
26.0	2.8404471207722177	-4.709629366354489
26.0	6.126928467791576	11.22556362648035
26.0	-8.967375588563812	-6.515934260125881
27.0	-0.022664947034324253	-0.058884683980046794
27.0	0.06403662639593252	0.028674161950332313
27.0	-0.041371679361600674	0.03021052202973895
28.0	20.898842613697774	13.543309137827011
28.0	-20.767802489555958	-4.7586431495633175
28.0	-20.927610937990597	-11.774702795265236
28.0	20.79657081384878	2.9900368070015335
29.0	6.415255991650009	3.3732927157975814
29.0	-7.696811948280983	4.544473050595376
29.0	1.2815559566310069	-7.9177657663929315
30.0	-18.525946430488364	-3.5131175635222798
30.0	19.953235191149187	-12.298476801246727
30.0	-1.4272887606608298	15.81159436476901
31.0	1.7581243163660734	-20.41795246549629
31.0	5.079383388726436	-21.908078718645857
31.0	31.836217469388135	14.938448420569738
31.0	-16.213971052133076	21.443294624363798
31.0	-22.459754122347587	5.944288139208675
32.0	-2.289189368266452	-14.832507864098357
32.0	3.7431421543155126	-11.917112983679335
32.0	4.704364056062129	14.098100542373796
32.0	2.710065165560158	14.713056750934868
32.0	-8.868382007671354	-2.061536445530984
33.0	-5.890880823138028	3.509751966351059
33.0	14.58755914971148	-18.661252483694447
33.0	5.572542502932953	1.4029940098257474
33.0	-7.066962427589152	6.945459320991415
33.0	-7.202258401917269	6.803047186526195
34.0	2.962653734861795	7.127469187652223
34.0	-2.784269222173414	6.31556699218649
34.0	-3.2894426915762174	-5.306711722929768
34.0	3.111058178887834	-8.136324456908957
35.0	-8.261984974003717	-7.0543370990272125
35.0	5.883404777624531	-1.088353118254217
35.0	7.455196189025259	5.007323466634855
35.0	-5.076615992646099	3.1353667506465626
36.0	4.660703463620137	-11.396586051318506
36.0	2.5721102579764716	8.851719761613579
36.0	-9.424917685430998	12.187705611884173
36.0	2.192103963834396	-9.642839322179231
37.0	-0.8459761718300076	0.5772888577403991
37.0	-0.8096628362949585	-0.009980127107644388
37.0	1.6556390081249521	-0.5673087306327518
