# Supplementary material
Source: ML conference proceedings conference paper supplement (https://openaccess.thecvf.com/content/CVPR2021/html/Harel_Crossing_Cuts_Polygonal_CVPR_2021_paper.html)
Supplement: Supplementary file 2 [file Harel_Crossing_Cuts_Polygonal_CVPR_2021_supplemental.zip › Dataset/D2/p5/pieces.csv]

piece	x	y
0.0	-3.317481099135279	-2.039205863097529
0.0	3.2985274701079943	-2.9605481291895597
0.0	0.018953629027297966	4.999753992287072
1.0	0.4184366184077362	-1.414763600908218
1.0	1.1995089977623732	3.6918813197002085
1.0	-1.6179456161701102	-2.277117718791991
2.0	-13.344405044641425	-2.416257703247816
2.0	9.326422056568754	-2.631723020717454
2.0	10.664849564948648	-1.0885782091831573
2.0	-6.6468665768759925	6.136558933148428
3.0	5.814830800206005	11.354646086120196
3.0	-14.007189688183054	0.8004682410506789
3.0	-15.421791720722824	-14.228697216775668
3.0	23.614150608699916	2.0735828896048045
4.0	8.577447355307548	7.257094817514927
4.0	-6.394475201193536	3.873185957877378
4.0	-7.396302361855538	-4.758685350762972
4.0	5.213330207741498	-6.371595424629332
5.0	0.3214394941035484	1.460651096456863
5.0	-1.1170432116586146	-0.5853555028075865
5.0	0.7956037175550762	-0.8752955936492786
6.0	8.655380228493078	1.7431817457582572
6.0	7.64155522329012	4.360290018709941
6.0	-0.6072881188596062	7.576136678972545
6.0	-10.912877874882026	-0.538573806551453
6.0	-4.776769458041572	-13.141034636889284
7.0	8.792837039480991	3.9261013997220466
7.0	-11.64119814560632	4.717486305412736
7.0	-18.023429482394278	-3.6664704714014
7.0	9.94667239902504	-3.331704332513264
7.0	10.925118189494581	-1.6454129012201038
8.0	-0.6187202615181534	0.4302362000327042
8.0	-0.11261665497090428	-0.8945863479112403
8.0	0.7313369164890529	0.4643501478785108
9.0	1.1173443680304613	11.270805385941935
9.0	-13.470574814052206	-2.257612853443821
9.0	-11.792100798470972	-6.919012957465583
9.0	5.522274384468104	-8.895964835167284
9.0	18.62305686002459	6.801785260134792
10.0	-20.478278809203108	-2.6070666136436005
10.0	10.081455094532698	-13.824145051937355
10.0	26.138492901391817	1.4401164479358592
10.0	3.151951499915631	13.270591237727519
10.0	-18.893620686637053	1.7205039799175545
11.0	-10.751779071492349	-6.078760818807743
11.0	-1.476687817220741	-9.431792100265112
11.0	12.228466888713088	15.510552919072852
12.0	5.217892186010972	13.405449355827322
12.0	-12.282923011966489	7.229471740827821
12.0	-12.210035601303513	6.796191277616753
12.0	2.6753080475779853	-15.165678136816375
12.0	16.599758379681063	-12.26543423745557
13.0	-5.608431006505135	-12.347138933125782
13.0	6.893693249984413	-15.686897408747612
13.0	12.421461409300747	-2.8616510624039937
13.0	2.01285030295397	18.243724024141073
13.0	-15.719573955733988	12.651963380136282
14.0	18.027975961695333	-0.944084387564112
14.0	10.682842111008425	5.361888032166758
14.0	-4.134942038985142	3.753030376673802
14.0	-19.021176876388704	-2.38967670173819
14.0	-18.67343050363067	-3.0208856698451396
14.0	13.118731346300754	-2.7602716496931072
15.0	-5.1100070537056075	-13.464812302498991
15.0	7.775182828241674	1.8982521375314265
15.0	5.455058699566945	15.088276610829535
15.0	-8.120234474103013	-3.521716445861976
16.0	-2.435569121032256	23.819902167805697
16.0	-10.681480176759324	14.677073662064089
16.0	-16.487417601088527	-23.58239651821613
16.0	11.727179554982186	-25.63648538624468
16.0	16.40389489823223	-9.735386875276367
16.0	1.4733924456656362	20.457292949867433
17.0	-10.717978990339702	-7.874758569468026
17.0	9.954076318068747	-13.48334180240944
17.0	1.1855475292100737	10.730777831664126
17.0	-0.42164485693914716	10.62732254021335
18.0	-10.111749186400788	14.685776351479545
18.0	-4.085396565702963	-10.035643345669984
18.0	-3.8201057197270796	-10.581997416546466
18.0	17.203989752592715	-8.406288222552597
18.0	0.8132617192381504	14.338152633289539
19.0	7.524953505108358	-12.811669887259221
19.0	1.83386375362043	11.34110695075424
19.0	-6.21609211598572	12.093952064409763
19.0	-8.127862712552314	10.26952307619769
19.0	-1.330431801795977	-5.811591672068855
19.0	6.3155693716052355	-15.081320532033612
20.0	-3.6168847226317973	12.80369784168776
20.0	0.19530532212115442	-11.856197485057262
20.0	2.168443665412108	-9.791225921179285
20.0	1.2531357350985255	8.843725564548777
21.0	1.5056751995577393	3.364011943594404
21.0	-7.135922913241019	-5.396332200000886
21.0	5.63024771368329	2.03232025640648
22.0	-6.880158922281085	3.8467205517892276
22.0	-7.977738657939416	-11.149468873546398
22.0	7.688306208351676	-2.463335191643236
22.0	7.169591371868826	9.766083513400394
23.0	11.03301760376494	19.71968621307151
23.0	-12.763086885955918	7.9547555272411135
23.0	1.7300692821909807	-27.67444174031261
24.0	-0.034151629490370455	2.906472832702045
24.0	-2.1970976381889926	2.1437292823979703
24.0	-2.582678482701201	-2.8350487438115284
24.0	1.754200095393286	-1.611226357534771
24.0	3.0597276549872827	-0.6039270137537225
25.0	2.877349783088406	14.508499005288535
25.0	-6.113295740812147	4.262412064999825
25.0	3.235945957723738	-18.770911070288353
26.0	10.131683694477813	0.39779744010435625
26.0	-8.601724393926999	2.819292753027564
26.0	-10.805221938903658	-1.4110884167948483
26.0	9.275262638352846	-1.806001776337059
27.0	-0.4180628788271653	0.5107475477564223
27.0	-0.506414133387933	-0.021101119762323175
27.0	0.9244770122151024	-0.489646427994102
28.0	-17.19713957566594	7.513098010598888
28.0	-10.24522932360856	-4.040499691966154
28.0	7.974012972997603	-9.152234808673207
28.0	13.180099119387254	-4.402728513304477
28.0	6.288256806889656	10.082365003344945
29.0	-2.190742271190916	-2.596410163591121
29.0	1.3938692313219476	0.2986533390360443
29.0	0.7968730398689569	2.297756824555063
30.0	-10.502428236789239	-7.393181580704246
30.0	6.987398178849973	-5.33148155742604
30.0	4.469161758018176	4.323310036094355
30.0	2.421914629951006	4.7672870699007355
30.0	-3.3760463300299075	3.6340660321351836
31.0	-9.360503499261485	-12.314892423377295
31.0	11.0742851216417	1.5518514952208724
31.0	-1.713781622380202	10.76304092815643
32.0	-4.7481802807527895	5.585873139249593
32.0	-9.199255992676024	1.4957277847065604
32.0	-9.02741482960429	-0.242482966546723
32.0	12.079392300608623	-6.5375802405228045
32.0	10.895458802424475	-0.3015377168865911
33.0	-6.946697370002959	-8.368900504090696
33.0	7.54795045116461	-0.7808163018773909
33.0	-0.6012530811616567	9.149716805968087
34.0	-6.159564866215573	22.84359662672739
34.0	-4.28807454784152	-14.574183832148336
34.0	-4.099437770378723	-14.55968109917942
34.0	0.7681407576139921	-9.730213566954786
34.0	13.778936426821822	16.02048187155515
35.0	-2.0202140324417384	-11.065409223449874
35.0	-1.9901510866547896	-11.159787963174372
35.0	3.238437092254345	11.774345064981594
35.0	0.7719280268421745	10.45085212164264
36.0	-2.8293206542264207	-9.293256852777798
36.0	6.909546928765977	0.3727568746713507
36.0	-4.080226274539565	8.920499978106436
37.0	-0.3810921861332721	-2.7222371600520767
37.0	3.0321476857565575	1.5453555215637722
37.0	-2.6510554996232853	1.1768816384883045
38.0	-0.0790295638819803	0.08056181608731333
38.0	0.1275639763898233	-0.17522829460486503
38.0	-0.04853441250784302	0.09466647851755168
39.0	19.80928688549795	-2.7362576891430845
39.0	-11.774420689416543	25.697665554736023
39.0	-25.0361916611235	20.638942096218507
39.0	-2.0960049572612136	-22.955645300252854
39.0	19.097330422303294	-20.644704661558585
40.0	-1.3685139512262534	-9.410254052704465
40.0	9.3334661666166	3.0117133425401414
40.0	-7.964952215390341	6.3985407101643075
41.0	-10.832241654183006	-1.495958731717216
41.0	6.2667471595273	-1.301864300005891
41.0	4.565494494655704	2.797823031723105
42.0	6.377522294363709	-6.493729502329477
42.0	-10.337868801688908	13.65218655502106
42.0	3.960346507325192	-7.158457052691576
43.0	-2.0326077804008444	10.993305816145343
43.0	-10.028537408726569	-7.157914915419337
43.0	12.061145189127402	-3.835390900725998
