# Supplementary material
Source: ML conference proceedings conference paper supplement (https://openaccess.thecvf.com/content/CVPR2021/html/Harel_Crossing_Cuts_Polygonal_CVPR_2021_paper.html)
Supplement: Supplementary file 2 [file Harel_Crossing_Cuts_Polygonal_CVPR_2021_supplemental.zip › Dataset/D2/p6/pieces.csv]

piece	x	y
0.0	-9.736038276511296	18.18268519934521
0.0	6.612007464808234	-21.969610895549035
0.0	9.691632049741493	-19.896105483122767
0.0	-6.567601238038424	23.683031179326598
1.0	-1.6898815291283604	-1.7748666921033076
1.0	2.272641260700905	-1.765829684907602
1.0	1.7912709815239312	1.6254180444851367
1.0	-2.374030713096474	1.915278332525759
2.0	2.0116768209662306	-1.0926739651702686
2.0	-0.7771426456338146	1.0469471808484887
2.0	-1.234534175332415	0.04572678432178155
3.0	0.24021003344430045	-1.0797811121319496
3.0	0.20038422156150335	0.8872468141894
3.0	-0.4405942550057944	0.19253429794254606
4.0	1.423282179371066	13.081409045887332
4.0	-13.654364422702855	-14.82820225429575
4.0	2.182779860097435	-5.464948027525315
4.0	10.048302383234354	7.211741235933737
5.0	-21.799448202829858	-8.928893949914935
5.0	49.574411087584174	2.65806086333604
5.0	-4.40621653062078	5.37372118022245
5.0	-23.36874635413355	0.8971119063564414
6.0	-20.85986786411965	-6.4937181358574145
6.0	22.06201349957844	-8.079844376351954
6.0	11.568184030913057	6.941645283475079
6.0	9.094607417975306	7.723480650705158
6.0	-21.864937084347144	-0.09156342197086428
7.0	-3.5632781159612392	-4.896915645718708
7.0	0.19782076060727602	-6.239329721857347
7.0	6.041012482263684	12.195807168939245
7.0	-2.6755551269097313	-1.0595618013632178
8.0	7.78349937932017	-17.405611171156504
8.0	-4.061512211087894	28.23596493503367
8.0	-11.165153831487652	22.562443504310988
8.0	7.4431666632553855	-33.392797268188176
9.0	6.120999982075339	-9.27866575569744
9.0	9.121662447747445	12.204541953641462
9.0	1.2133150022856127	13.010278487731126
9.0	-7.7192194598708905	-1.0389204427615797
9.0	-8.736757972237507	-14.897234242913578
10.0	-0.049019166471001546	-8.07733274932402
10.0	1.4529703702586614	3.4845151703162394
10.0	-1.40395120378766	4.59281757900778
11.0	-8.1769327694928	-19.047162052538027
11.0	28.263805997301642	10.052117802971878
11.0	12.656514707917056	22.709926166399864
11.0	-32.74338793572591	-13.7148819168337
12.0	-8.86603328612174	50.27427518340101
12.0	-24.478660004159956	18.240212027873014
12.0	-0.08688933741525129	-34.76623374647994
12.0	4.845518530393586	-31.23047972176022
12.0	28.58606409730332	-2.5177737430339127
13.0	-6.85187464394268	1.2184814430385948
13.0	0.2023633757880866	-4.51995194753663
13.0	12.319527989925037	1.2954779583904916
13.0	-5.670016721770457	2.0059925461075396
14.0	-38.777424904600224	-9.939722462159477
14.0	-37.85921480929626	-10.657652653000355
14.0	19.841117938185032	-11.487153007188223
14.0	28.862367354012935	-9.038477145091303
14.0	15.895499082450911	20.916835417099524
14.0	12.037655339247664	20.20616985033988
15.0	-30.62128774653711	-7.115099747582068
15.0	-25.256843458715746	-10.701999163688026
15.0	23.21067417542265	3.8238768966430907
15.0	21.45294984310096	7.289187174014347
15.0	11.214507186729232	6.704034840612681
16.0	-7.88885730096425	-8.776817371387866
16.0	32.227576984330184	8.55456903277369
16.0	-24.338719683365916	0.2222483386141784
17.0	15.580146591197535	-18.92170656101468
17.0	19.37228492097467	-14.879670164669962
17.0	-6.961680307170075	9.712824780113577
17.0	-12.6840643689181	12.902799856455168
17.0	-15.306686836084062	11.185752089115926
18.0	-0.26187569050783077	-5.526103077291617
18.0	6.89794307665775	7.406066124651033
18.0	-6.636067386149919	-1.879963047359416
19.0	-0.10664659771958837	-3.1937037424428194
19.0	7.928706596878026	7.177636042734336
19.0	7.212396155520932	8.316225270652621
19.0	-8.477233026895538	-4.226674307472705
19.0	-6.557223127783809	-8.073483263471413
20.0	1.7852595656244339	2.636747935197159
20.0	-2.2640369010521852	3.0013920575755932
20.0	-1.6533890755451062	-3.2246676830390766
20.0	2.1321664109728564	-2.413472309733669
21.0	-3.6196455167135673	0.7539320994744484
21.0	-2.657211536184758	-1.3804223085203398
21.0	6.276857052898323	0.6264902090458979
22.0	-1.146517085762268	-1.4476520446181549
22.0	-0.13897392364245506	-2.249718853073754
22.0	1.2854910094047216	3.69737089769191
23.0	-1.473810690349222	5.303836724410554
23.0	-2.260790842740282	-5.528665322713803
23.0	1.6650791898562691	-5.102849177966286
23.0	2.0695223432332357	5.327677776269529
24.0	35.014037812264036	-17.085099475077225
24.0	-11.33317812171164	10.526336531410857
24.0	-13.271298692341857	11.173425744444817
24.0	-10.409560998210528	-4.61466280077845
25.0	1.6590990811658406	-13.288203927579714
25.0	4.7072033642553155	23.762867352859644
25.0	-6.3663024454211525	-10.474663425279918
26.0	-1.6861688540719182	4.067895857445174
26.0	-1.6067132780878883	-3.3922891611665147
26.0	1.5329621941246194	-4.975118994328808
26.0	1.759919938035187	4.299512298050152
27.0	1.7421412095284279	-3.476504262378347
27.0	1.4743807275708503	3.0267597808918705
27.0	-1.9447068584452378	4.147526743813439
27.0	-1.2718150786540403	-3.697782262326964
28.0	7.559657266375146	-15.440313338555383
28.0	13.135516656363716	22.179013111603563
28.0	-6.505578314272033	21.436054972172556
28.0	-14.189595608466835	-28.174754745220746
29.0	-19.82984146842693	-3.5388458118220116
29.0	-0.041483488796882365	-17.7651436710827
29.0	27.654017584353234	8.363893990878031
29.0	-7.782692627129406	12.940095492026678
