# Supplementary material
Source: ML conference proceedings conference paper supplement (https://openaccess.thecvf.com/content/CVPR2021/html/Harel_Crossing_Cuts_Polygonal_CVPR_2021_paper.html)
Supplement: Supplementary file 2 [file Harel_Crossing_Cuts_Polygonal_CVPR_2021_supplemental.zip › Dataset/D2/p7/pieces.csv]

piece	x	y
0.0	-1.0203302328579913	5.0875476673471685
0.0	-15.851264941902285	-6.296692712396795
0.0	0.7840484363672767	-4.483179330467352
0.0	9.512824765096774	-1.2354632419470533
0.0	6.574721973296233	6.927787617464018
1.0	-7.26900160305731	1.1045465727843657
1.0	-2.6665492588153787	-3.832501956498507
1.0	9.055618258293048	-1.2229266735523228
1.0	0.8799326035795988	3.95088205726642
2.0	30.292458720568565	-7.88225318649959
2.0	13.565686087705886	24.238742768903517
2.0	-23.755250435084246	14.562703240193162
2.0	-11.699255720201307	-15.225854267551002
2.0	-8.403638652988883	-15.693338555046083
3.0	-5.96752082285512	8.215247401671856
3.0	-3.159488089618284	-8.187243351271011
3.0	3.756372884505815	-14.65315480568631
3.0	11.28004138668044	5.236399009663566
3.0	-5.909405358712834	9.388751745621917
4.0	-2.1593581330981366	4.336018032285022
4.0	-0.29940870728351676	-4.0245094580625365
4.0	0.8554659619196223	-4.3474060957194105
4.0	1.6033008784620013	4.035897521496891
5.0	-0.028340323067565017	6.609480136804863
5.0	-3.88761947330029	0.39004357776177395
5.0	3.9159597963678436	-6.999523714566628
6.0	-14.643742979099184	-16.12387210318252
6.0	30.983978472500596	-16.196389503180338
6.0	16.32850254639677	29.701689983274267
6.0	-1.4425042425265224	25.76771238533845
6.0	-15.707182507866412	-7.40984636916441
6.0	-15.519051289405235	-15.739294393085437
7.0	-1.1336822133837936	-2.9022769206456216
7.0	3.824284952779976	4.652294629553878
7.0	-2.6906027393961818	-1.7500177089082631
8.0	8.618020456815024	-1.4693996813986248
8.0	-1.30514335361789	1.9513273389244181
8.0	-2.703043080829998	1.7625047125197915
8.0	-4.609834022367138	-2.2444323700455993
9.0	-1.1705674402547843	3.7535002851164965
9.0	-6.066987521685059	-5.243448746244937
9.0	7.23755496193985	1.489948461128409
10.0	-4.540374910343152	-1.9661982974339924
10.0	4.138381167675294	0.2578695295979327
10.0	0.4019937426678574	1.7083287678360914
11.0	2.8019242038216796	-0.06955214490182998
11.0	1.1372288221200413	3.601423488794478
11.0	-4.972284678104049	4.417869776431253
11.0	0.07730087118576791	-3.920758960543943
11.0	0.9558307809765457	-4.028982159779921
12.0	-4.352271387820576	-4.610251594919176
12.0	10.573378291323849	-2.3177772302210102
12.0	9.691754564623674	1.2987695826666341
12.0	-10.80038956483224	9.313211237684015
12.0	-5.112471903294721	-3.6839519952104665
13.0	-0.0008749031267958528	-1.624921960528788
13.0	1.1964338642367078	-1.5675567522316516
13.0	-0.46220422038797243	1.5577172389155713
13.0	-0.733354740721914	1.6347614738448641
14.0	3.793911628720814	8.344576887484072
14.0	-6.021536065820724	-1.6506503842623472
14.0	-5.062424013081697	-2.458143823958461
14.0	7.29004845018162	-4.235782679263238
15.0	-17.4741071656123	-11.647185143052274
15.0	21.21935218855129	-13.27422048021041
15.0	15.249914827717319	18.95453393995539
15.0	-18.9951598506563	5.966871683307289
16.0	14.973930300303044	-9.244710578917175
16.0	20.44798757469084	4.976511217415491
16.0	-17.13764704807028	3.9608520871587602
16.0	-18.28427082692362	0.30734727434291315
17.0	1.6538051532952092	-3.9968269699048777
17.0	5.76742523632696	7.813653823156913
17.0	-2.3972440552644163	0.8917681068110113
17.0	-5.023986334357764	-4.708594960063038
18.0	-3.4424415385736293	-16.929665952884605
18.0	2.6631262835286407	-1.6039472554116505
18.0	0.8287369085244379	9.43995673220535
18.0	-0.04942165347943368	9.093656476090906
19.0	10.66659272030224	-6.365890807314091
19.0	12.944508814169975	-4.175949572229713
19.0	6.58122760380894	7.62430060862752
19.0	-15.44433584665585	3.323285919513293
19.0	-14.747993291625338	-0.4057461485970111
20.0	7.253877684965494	1.8095131162082054
20.0	6.095540616037867	6.777722033718386
20.0	-10.297621802333996	-0.9377988857776971
20.0	-3.051796498669371	-7.64943626414889
21.0	-12.68839380223367	21.086190699424282
21.0	-16.15946486156881	-10.68826005797165
21.0	4.4442408427140965	-15.716628644509257
21.0	15.262746936310796	-0.8885764468451257
21.0	9.140870884777602	6.2072744499017665
22.0	21.917781787561765	0.08975311724699546
22.0	24.287722879735703	1.59988514948966
22.0	19.309202954586723	7.264683291294696
22.0	-15.243295051719043	7.61871890233333
22.0	-27.71722085109379	-5.780539402906376
22.0	-22.55419171907137	-10.792501057458296
23.0	-4.158978646486505	-15.825532863887394
23.0	8.191034467501542	15.868084324070962
23.0	1.4507277944763646	13.285409186740829
23.0	-5.4827836154914	-13.3279606469244
24.0	-0.09593389771886449	-9.858004557224085
24.0	5.762460264346364	-12.146459310152308
24.0	0.7098056564869512	13.29457718550492
24.0	-6.376332023114457	8.709886681871485
25.0	-1.2028752272838257	-6.680446039351172
25.0	0.44810037062631414	-8.878627582771788
25.0	2.2779211197135254	6.5742510907093425
25.0	-1.523146263055996	8.984822531413627
26.0	3.1730234840354457	11.48495434590536
26.0	2.752720719198394	12.216705084988009
26.0	-16.394021666547825	0.8685317815254692
26.0	10.468277463314026	-24.570191212418813
27.0	-7.347397346507713	-1.3630192525313711
27.0	5.465193739596585	-3.964757221638243
27.0	10.612922625790741	3.0053226298018374
27.0	-8.730719018879595	2.3224538443677996
28.0	-8.701753245032137	9.158205072189999
28.0	7.124535401323223	-26.99722850206576
28.0	1.577217843708915	17.83902342987576
29.0	3.419415545627738	-5.252311241648253
29.0	-4.275181313549684	9.334405047694638
29.0	0.855765767921917	-4.082093806046389
30.0	5.252751936567184	1.310439541487945
30.0	4.523153574801922	2.1786416725384132
30.0	-7.712262808700771	2.804573861307526
30.0	-5.666946977286999	-0.8643503037271482
30.0	3.6033042746186714	-5.429304771606767
31.0	-7.992018231382919	-5.769731542371934
31.0	5.847711573876835	1.2315557180053889
31.0	5.97291357088038	2.0108931537066597
31.0	-3.8286069133742857	2.5272826706598592
32.0	13.00026209899118	-10.792614979808672
32.0	7.920392092158447	3.9400400176834283
32.0	-12.132373786037736	13.988286112843769
32.0	-8.788280405111893	-7.135711150718517
33.0	0.035286822992932725	0.3184333790016559
33.0	-0.06805900249715599	0.25357373270328504
33.0	0.03277217950422195	-0.5720071117049479
34.0	0.3016318276722783	-3.3061676727813825
34.0	2.163207198811995	-0.24552613641855403
34.0	-0.38452876481935	2.376442391336085
34.0	-2.0803102616649407	1.1752514178638411
35.0	10.281793167321219	-10.964406360590894
35.0	10.032287228583579	-3.7323781616953995
35.0	-0.9392763006668883	5.7972760804661645
35.0	-19.37480409523793	8.899508441820121
36.0	-3.657790199185615	13.029004222367943
36.0	-9.082527295965322	-4.202261124281839
36.0	12.740317495150942	-8.826743098086101
37.0	-4.533452189448981	10.199778800822035
37.0	-16.92543793090754	5.310921105593779
37.0	-19.865164828127714	-16.59445971987344
37.0	19.043761547739127	-9.332600216192333
37.0	17.16377808125035	0.5812773863552649
37.0	5.116515319494711	9.835082643294774
38.0	1.9035705173102062	-0.6712988029933857
38.0	-0.7936757743149132	1.9568000600025517
38.0	-1.1098947429953097	-1.2855012570091928
39.0	-0.8747663356980117	-0.34041699593726377
39.0	1.9443481486035437	-0.1382514769488744
39.0	-1.0695818129055372	0.47866847288615144
40.0	-0.17686965529001997	-0.11311508645425311
40.0	-0.01183478026497086	-0.17825635121026148
40.0	0.1887044355549606	0.29137143766449586
41.0	0.06169373839868755	0.4455427924612891
41.0	-0.2988719225265774	-0.23529875441369805
41.0	0.23717818412787683	-0.21024403804760636
42.0	-4.888809085823158	1.7262041242517812
42.0	1.770450251378603	-2.3892885922059044
42.0	3.1183588344445528	0.6630844679541373
43.0	0.34235873171127157	-0.41043950321276684
43.0	-0.054741814487851835	0.6235727560957333
43.0	-0.2876169172234196	-0.21313325288298063
44.0	8.01023272976808	-31.479231183412704
44.0	4.88162002053334	5.192262646953817
44.0	-3.825859617985234	15.332123778506013
44.0	-9.065993132316203	10.954844757952849
45.0	9.928195777933098	16.333528193521584
45.0	-11.445124548076997	-14.467817385336382
45.0	-11.362174247661855	-14.574660719162372
45.0	12.87910301780575	12.708949910977166
