# Supplementary material
Source: ML conference proceedings conference paper supplement (https://openaccess.thecvf.com/content/CVPR2021/html/Harel_Crossing_Cuts_Polygonal_CVPR_2021_paper.html)
Supplement: Supplementary file 2 [file Harel_Crossing_Cuts_Polygonal_CVPR_2021_supplemental.zip › Dataset/D2/p8/pieces.csv]

piece	x	y
0.0	-2.1672488266514267	7.7524123802075735
0.0	-6.254204808316967	6.75127231803318
0.0	-2.131095447134878	-8.130327254366582
0.0	10.552549082103246	-6.373357443874183
1.0	-18.18014612361561	-3.8550999317724526
1.0	25.22528471873412	-18.54424171759949
1.0	11.144669995205302	9.7805167871989
1.0	-18.189808590323807	12.618824862173035
2.0	3.201453317153882	2.3016207521713654
2.0	3.058375747857487	2.5943531291150164
2.0	-3.052399637879124	0.7778099075904789
2.0	-3.207429427132245	-5.67378378887686
3.0	-2.976785235250084	-14.910598116744628
3.0	8.17414940013669	-15.544235144922357
3.0	7.512609215589442	15.657975535605486
3.0	2.7605317155081797	19.487519117620927
3.0	-15.470505095984228	-4.690661391559411
4.0	0.23906166631723078	-0.9091378122840057
4.0	0.4720101806627467	0.7700962783532073
4.0	-0.7110718469799712	0.13904153393078378
5.0	-1.315552026520399	-2.3192465414523165
5.0	2.5638567171011837	-2.4327381473371172
5.0	0.27177901633096035	2.314871929896971
5.0	-1.5200837069117594	2.4371127588924626
6.0	-4.025086645594662	2.2196592797856507
6.0	2.38438547484842	-4.601107407066528
6.0	1.6407011707462382	2.38144812728088
7.0	13.25079657613335	5.685425670298104
7.0	2.964984835088972	7.363154884196652
7.0	-10.809734328878532	-0.5133518422512249
7.0	-6.715218540174101	-5.143513181218266
7.0	1.3091714578303177	-7.391715531025257
8.0	3.297868418940152	2.7550928821286096
8.0	-0.3589127050830269	3.3991507642553374
8.0	-3.1631222902288934	2.0960448318016645
8.0	0.2241665763717402	-8.250288478185604
9.0	10.5956409914424	7.057920037305281
9.0	-11.51050591471815	3.3575476366867623
9.0	-10.826723920090695	-15.970098896889086
9.0	11.741588843366445	5.554631222897043
10.0	8.371519215406526	-4.197610956662888
10.0	-4.992566556673766	9.98010278028942
10.0	-3.378952658732767	-5.782491823626531
11.0	-12.001374203603858	11.642426491204477
11.0	-5.168743047723577	-21.991714276647865
11.0	15.653678655389601	-17.57783917806463
11.0	1.5164385959378348	27.92712696350802
12.0	-11.344535566282332	-3.1385770711664294
12.0	9.656984920373676	-20.627754114824036
12.0	10.874062016530255	-19.121203611924187
12.0	9.264647916713601	26.656870255447338
12.0	-18.45115928733516	16.23066454246733
13.0	11.642915495442951	13.648109407287711
13.0	-7.709060679675762	16.58062363421001
13.0	-12.237750011687778	-13.72167482432032
13.0	8.303895195920603	-16.50705821717739
14.0	8.699538553258865	-2.6588135841671496
14.0	11.309043555781992	0.7171840042750852
14.0	-7.471389122247663	3.6146621643279087
14.0	-12.537192986793174	-1.673032584435806
15.0	0.6924360695767531	5.842224403387081
15.0	-6.212013067966752	-4.035877380040089
15.0	-1.8796240722108546	-7.693079491017797
15.0	7.399201070600858	5.886732467670811
16.0	-1.0374769836390945	4.805527306782403
16.0	-1.549933363730099	-2.391191467965462
16.0	2.587410347369193	-2.4143358388169123
17.0	-13.157155258166979	13.739878198063645
17.0	-13.445969399138251	-10.269248601646835
17.0	2.625546926682944	-11.49760377235515
17.0	10.856906326077356	-5.6991762994661554
17.0	13.120671404544927	13.7261504754045
18.0	-1.5879307871093962	3.459019009954139
18.0	-1.7750060373960153	-1.8252408905583528
18.0	1.9990724321329765	-3.7541688763959993
18.0	1.3638643923724094	2.1203907570002256
19.0	-6.126770941162134	-21.778543902613062
19.0	22.754992799290402	1.1556716992503582
19.0	16.573755503504128	10.830356972428856
19.0	-1.4851102438168164	18.109005154690937
19.0	-19.390995901521997	5.815661438701292
19.0	-12.325871216293585	-14.132151362458384
20.0	-7.279807014461542	0.8929141399438483
20.0	-8.725812488518558	-5.373887096006087
20.0	13.04036921345155	-4.607377410190929
20.0	2.9652502895285355	9.08835036625318
21.0	-10.898203820394654	5.929709872885173
21.0	6.932801018056687	-10.131342024655162
21.0	10.812925950169042	-5.753278552546249
21.0	-6.847523147831075	9.954910704316239
22.0	7.022332499039203	18.53045876547376
22.0	-7.998762589279268	-2.361303430348835
22.0	-2.639860831416786	-7.554526771170417
22.0	3.616290921656863	-8.614628563954492
23.0	-10.46161482409295	2.6119173365037236
23.0	-0.6129789778419714	-5.696396717299616
23.0	5.669941321719764	0.8299829722481317
23.0	5.404652480215173	2.2544964085477512
24.0	5.495188766148745	27.6455776838445
24.0	-13.748751081176009	-7.578930332080067
24.0	-10.08826684191242	-15.982733298473669
24.0	18.341829156939678	-4.0839140532907585
25.0	-14.547925762654026	13.851968292308063
25.0	-6.236634195530432	-17.13844121079945
25.0	22.84550922065517	-12.311665917223772
25.0	-2.060949262470724	15.598138835715154
26.0	-15.031595094535849	-21.77044648813885
26.0	-9.344377201511527	-21.548819908310747
26.0	14.389123415572124	20.014757201450237
26.0	9.986848880475263	23.304509194999387
27.0	-3.248655227395094	3.623670798887712
27.0	-4.674275473325199	-5.256435138400988
27.0	7.922930700720279	1.632764339513278
28.0	-9.938097823612042	10.626046467684963
28.0	-8.239989555909695	-10.765443841954337
28.0	11.235057225449966	-9.493778560001235
28.0	10.443620002611178	-2.187850385196292
28.0	-3.500589848539409	11.8210263194669
29.0	-2.104518361468771	-0.33926023854761234
29.0	1.344710518270881	-0.6927973934649337
29.0	0.7598078431978971	1.0320576320125452
30.0	3.8676973115739663	3.1586800723734645
30.0	-7.730443082859755	2.580018809652768
30.0	3.8627457712858044	-5.738698882026234
31.0	3.096362231701265	-5.742404992088618
31.0	7.938713564903743	3.965024163428544
31.0	-11.035075796604998	1.777380828660093
32.0	-0.6351156442204066	1.9305418265788261
32.0	-2.0850787057174065	0.6802203944442691
32.0	1.704510264755206	-4.4043605319690835
32.0	1.015684085182621	1.793598310945991
33.0	1.2987554637152599	-0.46353846647845554
33.0	-0.693294420425569	1.1093454611628646
33.0	-0.6054610432897082	-0.6458069946844327
34.0	20.138343994365915	8.044450558537177
34.0	-16.599018979011465	0.9194552461409553
34.0	-20.934650705891126	-10.393282705728275
34.0	17.395325690536684	1.4293769010501036
35.0	-1.3521648844248135	11.500463377621879
35.0	-4.141921398820128	12.122876178643414
35.0	-6.002411023427805	10.875635172868636
35.0	-6.204873892407326	-3.736931892990401
35.0	2.7566230822790154	-15.301244287717152
35.0	14.944748116801076	-15.460798548426354
36.0	-4.11892839709104	9.471874903534305
36.0	-12.497245127375336	0.9577938370383166
36.0	-0.8224070074278191	-11.475940550559361
36.0	10.094492683257544	-9.800520030370997
36.0	7.34408784863662	10.846791840357753
37.0	-6.912053447511222	3.668909279611731
37.0	-6.468272781831918	-2.8470330331664218
37.0	13.380326229343135	-0.821876246445324
38.0	2.815360922498407	1.6557112272663985
38.0	-2.5993558718086756	2.5095930282809933
38.0	-2.9599194316963033	-3.8845764783336674
38.0	2.7439143810065714	-0.2807277772137321
