# Supplementary material
Source: ML conference proceedings conference paper supplement (https://openaccess.thecvf.com/content/CVPR2021/html/Harel_Crossing_Cuts_Polygonal_CVPR_2021_paper.html)
Supplement: Supplementary file 2 [file Harel_Crossing_Cuts_Polygonal_CVPR_2021_supplemental.zip › Dataset/D2/p9/pieces.csv]

piece	x	y
0.0	4.82699536923607	36.21298931579752
0.0	-13.754505619204004	4.289232823032819
0.0	-13.209280526009724	-60.962002595099236
0.0	22.13679077597765	20.459780456268906
1.0	12.179728490358139	-4.255163393268058
1.0	-2.6784487260737704	6.3962508252482815
1.0	-5.304697319548346	7.796661356678337
1.0	-4.196582444736028	-9.937748788658533
2.0	-9.212228045112518	-7.359774789683714
2.0	33.72892670573692	13.318822344415963
2.0	-24.516698660624414	-5.959047554732245
3.0	3.036162829428376	-3.523844515614653
3.0	-0.36895697933922916	2.1499027890690585
3.0	-2.667205850089133	1.373941726545599
4.0	1.8255285096247784	4.925645669146838
4.0	-1.9021606521054848	-2.8666158090278797
4.0	0.07663214248069257	-2.059029860118963
5.0	5.05074117091629	7.599343151757009
5.0	-19.178838241091377	-3.8151263446414783
5.0	-3.7052516938702444	-5.379458423510344
5.0	17.833348764045322	1.5952416163948022
6.0	-8.464829427805324	-7.477750454071538
6.0	4.583740310159912	-2.5426501623210216
6.0	8.906929829477185	6.687840783321461
6.0	-5.025840711831751	3.3325598330711
7.0	-15.297297107676245	7.253275713299815
7.0	30.667106302668703	-39.3352963494525
7.0	28.52005225765223	-30.85810086939149
7.0	-9.151729924629723	17.989476931641207
7.0	-13.941088233995998	22.61371223626966
7.0	-20.797043294018987	22.336932337633293
8.0	-8.914224083295172	15.015810640893683
8.0	8.015974748832102	-34.66190047007282
8.0	7.518788095812242	-1.486301837604371
8.0	-6.620538761349165	21.13239166678352
9.0	1.480972869158387	-2.8290346477873864
9.0	0.33311119884776164	10.01487693017077
9.0	-1.81408406800614	-7.185842282383373
10.0	7.372869748265942	-1.1395323031984501
10.0	-4.623581659680759	14.958086171464124
10.0	-6.656731164375024	15.276016130504908
10.0	-7.954771723770926	4.47040657683938
10.0	-0.7589930757864868	-11.740536330430773
10.0	3.562785780250268	-17.525684464230466
10.0	9.058422095097	-4.298755780948599
11.0	10.848795336995389	-8.240990045723084
11.0	6.0708322854996775	-1.2322769741542652
11.0	-8.683189771434796	5.640903134986405
11.0	-8.236437851060284	3.832363884890955
12.0	12.434148190709253	48.67125259019999
12.0	-9.449924502387823	-23.397937842967536
12.0	-2.9842236883214284	-25.27331474723245
13.0	20.83783422880225	-29.763412387978406
13.0	18.08829982900922	-8.098009573031051
13.0	-2.9543220983738143	17.71343874380793
13.0	-19.53982085288461	13.124333893280104
13.0	-16.43199110655305	7.02364932392142
14.0	11.05185973492965	-11.50562673275187
14.0	5.690455988112882	2.9233071170719236
14.0	-13.667897757480487	13.928695577436855
14.0	-3.0744179655620303	-5.346375961756921
15.0	-17.602587763305532	11.821267998422496
15.0	-14.630517341812963	6.793202319878261
15.0	14.51591796729131	-30.731513527898198
15.0	10.609392580819486	2.466701747606098
15.0	7.107794557007687	9.650341461991344
16.0	0.7551492592809359	8.017093990305531
16.0	-19.07590541706002	10.570089619604044
16.0	-20.63620821806631	-2.767175557577405
16.0	8.83860742006442	-11.043651176979346
16.0	30.118356955780975	-4.7763568753528265
17.0	-0.5652477815279339	-0.6384199891720743
17.0	1.5610161230942576	1.2070910943045563
17.0	-0.9957683415663238	-0.5686711051324818
18.0	48.38805901426565	-35.96478752612306
18.0	69.24555933401791	-0.26432012846086983
18.0	-17.786519458573437	18.152202867640277
18.0	-38.232059172423725	13.749476392668916
18.0	-41.25803415956364	8.327356799288843
18.0	-20.357005557722797	-3.9999284050141344
19.0	1.6702374272274938	-10.219413664205847
19.0	3.8593237118498585	7.690312860934702
19.0	-3.018695750520017	13.258243131742837
19.0	-2.510865388557325	-10.729142328471735
20.0	-6.404254709310992	-26.797470663900828
20.0	6.281348552335719	2.8367832318593496
20.0	0.12290615697527622	23.96068743204149
21.0	-17.93726945727781	-1.4937236736097699
21.0	-3.4563142040674495	-6.7474119150467695
21.0	4.539780295877412	-2.8463469461038198
21.0	14.30459070106	5.143606184855996
21.0	2.549212664407833	5.943876349904364
22.0	8.121449218038507	3.8343213829757734
22.0	-11.817991555428062	-0.22229205268194194
22.0	3.696542337389569	-3.6120293302938076
23.0	-12.365680423458507	-0.11085902700537012
23.0	-2.319964151254357	-14.072807053336678
23.0	14.685644574712867	14.183666080342054
24.0	0.9471296035163317	-3.7472143699648672
24.0	-0.08724870076497424	1.6331778765934841
24.0	-0.8598809027513707	2.1140364933713887
25.0	-4.11047614496506	2.5218292663636706
25.0	-4.225341595237592	2.195486847109277
25.0	4.435285054991185	-3.2769576161975515
25.0	3.9005326852114632	-1.4403584972753976
26.0	-6.064473960486039	-7.977231305579285
26.0	2.2175240818363204	-21.621513092844733
26.0	1.9973451599986516	14.870815147196444
26.0	1.8496047186510634	14.727929251227575
27.0	-8.110831967384899	-4.889943836421242
27.0	-1.2931866118710351	-4.655956342240615
27.0	5.652294315398943	4.613753414350799
27.0	3.751724263856984	4.932146764311056
28.0	-3.8015373747421815	3.9836127257320917
28.0	-6.386679121562043	3.3824496615605164
28.0	10.188216496304225	-7.366062387292608
