# Supplementary material
Source: ML conference proceedings conference paper supplement (https://openaccess.thecvf.com/content/CVPR2021/html/Harel_Crossing_Cuts_Polygonal_CVPR_2021_paper.html)
Supplement: Supplementary file 2 [file Harel_Crossing_Cuts_Polygonal_CVPR_2021_supplemental.zip › Dataset/D3/p0/pieces.csv]

piece	x	y
0.0	5.957580405419831	-6.592945862478213
0.0	-4.468606656208252	9.496065969601414
0.0	-5.945350846950284	8.630656592023728
0.0	1.0409790946265238	-5.399810999333242
0.0	3.4153980031121804	-6.133965699813686
1.0	-0.9759787558606777	-2.638088034501826
1.0	6.013100168823161	-2.4484935438244833
1.0	1.8510073646508713	4.134455901817002
1.0	-6.88812877761336	0.9521256765093209
2.0	2.683482461904681	-2.408098429916952
2.0	0.4472646272376141	1.321359846583803
2.0	-3.1307470891423064	1.0867385833331928
3.0	0.8156499256260585	1.0952951798507333
3.0	-0.22365185536728033	1.4032171675868519
3.0	-0.5919980702587755	-2.4985123474375883
4.0	7.88979471432944	-4.775503536290022
4.0	11.06911873298188	6.796542923519169
4.0	-1.5825468008015164	6.908989557469479
4.0	-10.69527033970953	2.4995886377808265
4.0	-9.465458931887541	-1.310994084629785
4.0	2.7843626250872617	-10.118623497849683
5.0	-1.536135416669066	-5.806945989674583
5.0	5.630792859934553	-4.172425425072957
5.0	5.766015369503451	-3.630974889782701
5.0	-2.131091853092523	6.617273305151924
5.0	-3.2447168733667304	7.246784297527475
5.0	-4.48486408630966	-0.2537112981492107
6.0	-5.962096092424202	-2.8453323425082377
6.0	5.8536659037401835	-1.9894901151981892
6.0	0.10843018868402499	4.834822457706442
7.0	-1.4662032423727125	2.3545283117248226
7.0	-3.63059768246438	-0.7924225750295719
7.0	3.4940715606675052	-5.191222754167839
7.0	1.6027293641695874	3.629117017472589
8.0	11.385314290558036	-11.028704928177563
8.0	3.358541035851683	11.8380121911743
8.0	2.083699542934277	11.788200368563341
8.0	-12.495459397289657	2.866209457880878
8.0	-7.982664417092069	-4.209149583781129
8.0	3.6505689450377377	-11.2545675056598
9.0	1.0608523164797656	8.307346549956975
9.0	-8.815573791424915	-2.4484860621503803
9.0	7.75472147494514	-5.858860487806588
10.0	1.1689301075224994	2.5048110888468753
10.0	-0.9475533181154474	3.8345405528940604
10.0	-1.122009135811262	-4.374773490352583
10.0	0.9006323464042286	-1.9645781513883755
11.0	-4.528978034304497	-0.09273033612435766
11.0	2.715201594983327	-1.1278430253733722
11.0	2.7618158959385086	0.0055645648350393095
11.0	-0.9480394566173506	1.215008796662724
12.0	-1.1731494486461707	-7.356868231147003
12.0	0.6714027277879331	-10.721136381935855
12.0	2.547858667737849	0.7139010612632949
12.0	-0.7846285568005409	8.895066515066961
12.0	-1.26148339007909	8.469037036752594
13.0	-0.009185754567313742	-1.5483289004517822
13.0	0.12480264019206999	0.8648594515762871
13.0	-0.1156168856247562	0.6834694488754949
14.0	1.7965750742601498	0.4198719922880694
14.0	-1.186086406751935	0.6953107872074491
14.0	-0.9257087908330609	-0.48737044901195925
14.0	0.3152201233248403	-0.6278123304836101
15.0	-6.1848933141684075	2.028457884211814
15.0	-6.447037271265703	-1.01213704718257
15.0	-6.101514777823919	-1.5046685080558624
15.0	-1.2992085771126365	-3.74004729918153
15.0	2.0239282198793944	-4.6144096082708685
15.0	9.982209399738169	3.575029292982353
15.0	8.026516320753151	5.267775285496656
16.0	2.4071080396434628	-1.7470206895617912
16.0	1.613490855877215	2.2771222169988827
16.0	-4.0205988955207035	-0.5301015274371111
17.0	0.635598030043671	-5.4000922709434835
17.0	2.796453044931172	-4.986433709150955
17.0	3.0053663138897857	-4.765994404323531
17.0	-2.660603608530891	9.917673370898385
17.0	-3.875034555085199	10.26530893379712
17.0	0.09822077475145319	-5.030461920277563
18.0	-4.730244373600394	-6.878829844379911
18.0	4.576133734328348	-7.571194462547934
18.0	3.794255022469127	7.136178579771338
18.0	-3.6401443831970823	7.313845727156507
19.0	3.1852871600058235	-1.7110106451266494
19.0	2.186512691896057	3.5841629077920993
19.0	-2.823892847872901	-0.4917996711848509
19.0	-2.5479070040289984	-1.381352591480638
20.0	-9.284007863340461	0.8645018932618997
20.0	-0.8245414189518607	-12.70598183038391
20.0	18.117324263113893	-2.448421534147263
20.0	2.7083683018690397	10.354992848636282
20.0	-10.717143282690614	3.9349086226329937
21.0	13.751868754043116	-2.7109480338446126
21.0	8.43808407305187	5.176259221423413
21.0	-16.243245057068147	4.930842119843004
21.0	-16.084978732344393	-0.6451301149849423
21.0	10.138270962317613	-6.751023192436864
22.0	-1.0311385123860672	-0.10079636298174632
22.0	0.08653616315774315	-0.8097136325772609
22.0	0.5472681181626147	0.27799341593650795
22.0	0.3973342310657252	0.6325165796225014
23.0	0.6630166221730678	-0.3475239840842118
23.0	0.6031333048120475	2.1533233677110113
23.0	-1.2661499269850869	-1.8057993836268023
24.0	-0.9789484353507106	0.7458013379242864
24.0	-0.5312826290506093	-0.38868386962272233
24.0	0.8029835582140129	-0.29240211628507595
24.0	0.7072475061873069	-0.06471535201648806
25.0	-17.98781509092975	-1.2233442824717553
25.0	1.6098264017448418	-6.404104591919806
25.0	11.708206217275642	1.4579592993713968
25.0	4.669782471909276	6.169489575020172
26.0	5.135078743233568	-0.9630511361392136
26.0	-3.4064036139677754	4.769467991718363
26.0	-4.8719625241401845	0.2669053853629806
26.0	0.13957582965920512	-2.3515348822644655
26.0	3.003711565215164	-1.7217873586776493
27.0	-0.23875690249049814	-0.9960063315888762
27.0	0.5597786123946353	-0.17093704776343252
27.0	-0.32102170990413714	1.1669433793523087
28.0	-4.512260449337891	-7.718331479043804
28.0	13.526663401301112	2.675988153676891
28.0	4.758349182343851	6.568173003235343
28.0	-13.772752134307032	-1.5258296778684155
29.0	-1.4601225369249846	-0.50078772076403
29.0	1.0318960423633323	-2.004199060656408
29.0	0.4282264945616563	2.504986781420444
30.0	0.16586917705368914	-0.5997632824090763
30.0	0.2016090336218306	0.1236825136146095
30.0	-0.3674782106755311	0.47608076879447525
31.0	-3.8185675820544374	1.065755905763384
31.0	3.8996109581106917	-5.490540928793548
31.0	3.697452267225874	-0.3293349475815444
31.0	-0.25236510599787365	2.3643677494750333
31.0	-3.5261305372842484	2.3897522211366753
32.0	-0.8265533462894803	0.8828954425446438
32.0	-3.863805641311721	-1.8763223804790936
32.0	2.831204429408735	-1.5847112299568313
32.0	1.8591545581924742	2.5781381678913062
33.0	4.529413822688186	2.283258231565042
33.0	2.0568108854359215	2.266061833462052
33.0	-3.980143989227267	-1.04120157052337
33.0	-4.2755572439834975	-1.6430334113155594
33.0	1.6694765250866792	-1.8650850831881571
34.0	1.3536510694303225	4.886060571955967
34.0	-1.917714237743983	-2.2294966370945564
34.0	0.5640631683136674	-2.656563934861412
35.0	-9.339490761628644	4.805800295170139
35.0	-4.927688857990719	0.5530358679193124
35.0	0.9093717426131381	-2.8374342159489743
35.0	6.232986456184246	-3.2135654295656524
35.0	7.124821420821974	0.6921634824251659
36.0	-1.1066187827952527	0.27571314753606885
36.0	-0.5648597378756133	-0.9010350635109807
36.0	2.3747204712216097	-0.7817519926530819
36.0	-0.7032419505507673	1.407073908628011
37.0	-1.4677933851592315	3.129431455094446
37.0	-0.2888820034225814	-2.1436041646454314
37.0	1.7566753885818094	-0.9858272904490151
38.0	-5.550390823672205	-5.298473647609343
38.0	5.120022006582395	1.896131794424553
38.0	0.4303688170898109	3.4023418531847893
39.0	-1.9797564070200668	1.2438553646396748
39.0	-2.9004159586794795	0.3655194147698274
39.0	-3.6960887704944376	-3.1665786997311134
39.0	3.448346461767281	-1.2686422185434325
39.0	5.127914674426714	2.8258461388650318
40.0	-0.9066415827970858	0.4195230645697169
40.0	-1.2198743547954214	-0.054049144414222594
40.0	2.126515937592502	-0.365473920155475
41.0	5.421332447000168	6.074602849885045
41.0	2.4601593468572514	5.146970682071093
41.0	-4.419991079666024	-5.177531951300361
41.0	-3.4615007141913905	-6.04404158065579
42.0	0.9958078236280805	7.232119633007208
42.0	-2.808630558607924	-1.8238797198048302
42.0	-1.1068686745249428	-3.8958040265724083
42.0	2.919691409504802	-1.5124358866299674
43.0	8.175083082330252	-5.522856988883452
43.0	6.854985441836192	3.8317310363142143
43.0	-8.921712616979656	9.330762790852832
43.0	-11.589219916430585	5.992303365910475
43.0	5.4808640092437635	-13.631940204194056
44.0	0.8010520432077692	0.3394380158590394
44.0	-0.581313829108834	1.5568285155934738
44.0	-0.21973821409892155	-1.8962665314524985
45.0	2.875904015711071	1.8869449093582178
45.0	-4.05754264825063	7.767862517864913
45.0	-5.3935636069829	4.689516086589045
45.0	3.220924757594587	-7.187749085762411
45.0	3.3542774819278742	-7.156574428049764
46.0	0.5027910489102387	-3.2240389914054823
46.0	2.4930849573808196	-1.0856345557041416
46.0	-1.2996956781947189	5.575750431268828
46.0	-1.696180328096332	-1.2660768841592012
47.0	-1.895116178529237	2.63911848624656
47.0	-0.3192558758374513	-2.669181456899615
47.0	1.3389601900701542	-4.470719873549713
47.0	0.8754118642965216	4.500782844202771
48.0	2.7745492745029567	-2.746194310240367
48.0	-1.0326258874766487	6.604973264427956
48.0	-1.7419233870263058	-3.8587789541875726
49.0	-6.742740969659126	-0.1073144527763148
49.0	0.6230119049367753	-11.457218411499396
49.0	2.098637496371172	-12.512271432913895
49.0	13.957974348065477	0.47500868669452423
49.0	-3.9825183746604287	17.401232186781517
49.0	-5.954364405053905	6.200563423713608
50.0	2.670994420126843	-6.101132494333653
50.0	5.654605539866221	2.0775725047489253
50.0	-6.8932500106410295	9.413576960867395
50.0	-1.4323499493520404	-5.39001697128268
51.0	-1.4880958064319532	3.4512608936324103
51.0	-0.25436158939410947	-1.0117149066075568
51.0	1.7424573958260643	-2.4395459870248564
52.0	12.485055288906974	-14.19916856476782
52.0	9.450719811079164	7.3533489386497966
52.0	-13.806669212773183	9.004865994560072
52.0	-8.12910588721297	-2.159046368441989
53.0	2.295104656605308	-9.731881150678984
53.0	1.578817569426573	4.1344943200686295
53.0	0.2554452001366164	7.915477928767033
53.0	-0.3854076608025939	7.853557576627515
53.0	-3.7439597653659034	-10.171648674784201
54.0	-1.6580402082871641	-1.3724116427503272
54.0	-0.3510865827249821	-1.001438331553135
54.0	2.009126791012167	2.3738499743034827
55.0	-3.1461637143965664	-2.580770370059097
55.0	4.053882207238912	-0.8281370858095383
55.0	2.739657369075694	3.297284776455772
55.0	-3.6473758619180403	0.11162267941286697
56.0	0.8245364487796845	4.822752354681698
56.0	-5.208092578331501	-2.907867952420805
56.0	-1.624936199514401	-7.142317728532842
56.0	6.0084923290662235	5.227433326271957
57.0	15.429118870121806	0.9795820002866336
57.0	-5.355431377885941	7.174059172225404
57.0	-13.808002345345821	4.303274786729363
57.0	-4.669087302716518	-7.844610760192258
57.0	8.403402155826459	-4.612305199049137
58.0	-17.904251419124734	-4.37533529621246
58.0	-13.005291739741464	-6.929723542700308
58.0	15.817513012094077	0.8955810108338369
58.0	16.18762316917452	2.4420065678303704
58.0	-1.0955930224023627	7.96747126024857
59.0	-0.20330101218240582	0.8510995375839844
59.0	-0.6881699995015578	0.06710055699756615
59.0	0.14053119533120015	-0.9234173147019503
59.0	0.7509398163527886	0.005217220120395494
60.0	-12.149384542813035	-10.052712468984865
60.0	17.883764907727272	-1.5677195882619444
60.0	8.38525929848202	10.261822995716388
60.0	-1.4970687871914015	6.600834042762372
60.0	-12.622570876204847	-5.242224981231946
61.0	0.8592339736945411	-16.16502007358727
61.0	12.323203519245311	8.14762838647164
61.0	-2.3591261746010117	10.907326884653026
61.0	-5.956356358501516	5.374375847990407
61.0	-4.866954959837338	-8.264311045527757
62.0	6.156325315917439	0.30199508717577284
62.0	4.74133866912544	5.272583622275552
62.0	-4.935206410282757	2.4643826004049405
62.0	-4.893710899812369	0.5844168701548718
62.0	-1.068746674947754	-8.623378180011137
63.0	0.1409284185475781	-3.9827231843734796
63.0	0.19402500378379273	7.662992169890417
63.0	-0.33495342233135705	-3.6802689855169444
64.0	0.11492430485085009	3.9572275324946884
64.0	-2.102860452901371	3.0289588066994164
64.0	-1.1652064696824125	-6.027553200327307
64.0	3.153142617732924	-0.9586331388668059
65.0	-0.27131483191101613	-2.6253381715197444
65.0	0.1782798311017939	-2.861695796477632
65.0	0.16656963229512645	2.619552537011723
65.0	-0.0735346314859191	2.8674814309856567
66.0	-1.5956234148864248	-2.9201271368854846
66.0	2.0694173237016593	2.413731831072516
66.0	1.5402304194273717	3.5487122271062415
66.0	-2.0140243282426056	-3.042316921293273
67.0	0.9901880519045975	-5.5553107571051585
67.0	4.7917652184741675	-1.82771035739438
67.0	5.490547359249182	15.196715626638392
67.0	-8.72312057520731	-2.1572950853446704
67.0	-2.5493800544205953	-5.656399426794227
68.0	0.741428599648424	2.976291762561412
68.0	-3.3424562191237013	2.137166505843092
68.0	2.6010276194752695	-5.113458268404512
69.0	-5.391213719937502	-0.29616509048519024
69.0	-4.077031876230744	-7.6018523251831915
69.0	2.907991789728978	-4.28225969488069
69.0	3.447336394633455	-2.702866661360653
69.0	2.695938581184744	7.870578276231672
69.0	0.4169788306210376	7.012565495678061
70.0	-11.306590333563154	5.295102709834174
70.0	2.5956304342960177	-11.44763415638899
70.0	10.614198535347498	-11.241157959869394
70.0	1.1516193653047977	7.750233320310532
70.0	-3.0548580013851585	9.643456086113662
71.0	1.0723793687517567	-7.967958138132349
71.0	3.9864043491413055	0.47337667272710693
71.0	-1.9261819855655147	3.849674287228736
71.0	-3.1326017323275464	3.6449071781764832
72.0	1.3418871001590371	1.7343166564295784
72.0	-1.128862947128877	0.9841013542633972
72.0	-0.21302415303014122	-2.718418010692966
73.0	8.71497841496222	3.2693268806472444
73.0	-3.764773423436802	1.9976175228626167
73.0	-4.950204991525437	-5.266944403509887
74.0	10.899195244647181	6.650561488903609
74.0	3.8809421739909817	12.41217068462158
74.0	-8.478720721727655	12.384712717171258
74.0	-16.451053328729735	-7.660099488781979
74.0	1.7406749995978048	-13.68993569157108
74.0	8.40896163222142	-10.097409710343367
75.0	-22.436313775463148	-1.9535590096373494
75.0	4.813590121968328	-6.708788736473501
75.0	17.4591040420599	-7.257588326794533
75.0	20.109488828261227	3.6055022548846147
75.0	-19.945869216826267	12.314433818020804
76.0	19.745548821547676	7.306295788021079
76.0	-1.386991792529877	8.983420564305176
76.0	-9.211415843540191	-4.698134863401415
76.0	-9.284386272563117	-5.166577240131416
76.0	0.13724508708548755	-6.425004248793418
77.0	-0.03990219789963509	-0.6559290765884801
77.0	0.6378945214815026	0.9933392115629522
77.0	-0.5979923235818658	-0.33741013497447303
78.0	-7.3848347949106925	6.3167875836627685
78.0	-3.1971471302778256	-16.59644300254026
78.0	4.044880672609502	-13.608469463299176
78.0	7.774136786190571	12.131025256567751
78.0	-1.237035533611551	11.757099625608927
79.0	-5.012791309115358	3.2761242603810024
79.0	-5.387652237028497	2.605015507453775
79.0	-5.07586162207614	2.181601269028288
79.0	6.945450699749888	-5.5550395800520675
79.0	8.530854468470139	-2.507701456810951
80.0	1.0140910889099581	0.3087404572531379
80.0	0.9099246656536784	0.5350171567806635
80.0	-0.602554001195778	1.165777363566716
80.0	-1.3214617533678659	-2.00953497760052
81.0	-3.143673219393347	-3.588312186252325
81.0	3.5832626257510642	3.0887725050340884
81.0	2.784812545371349	3.52786130884749
81.0	-3.224401951729068	-3.028321627629224
82.0	-6.516934537098441	-6.016275494296865
82.0	1.3552196147785747	-5.608275676845204
82.0	9.494653754175527	-2.3530237892563606
82.0	8.229368573330476	1.0187572237856124
82.0	-12.562307405186148	12.958817736612836
83.0	0.4880556420067588	-3.646339967819235
83.0	2.9184769507813213	0.04451953097458311
83.0	3.4919563365276214	5.268559468928311
83.0	-3.5535599878310586	4.094073771378634
83.0	-3.3449289414847128	-5.760812803462276
84.0	-5.517092274395077	0.4976644629625171
84.0	-5.768485017227188	0.07199743057635066
84.0	5.277802132246402	-0.7550766241459748
84.0	6.007775159375845	0.1854147306070857
85.0	-10.185743130038729	1.3405537640391691
85.0	-11.176592103926282	-6.226615210572474
85.0	9.66943036517304	-10.54299876788499
85.0	17.802467979227867	5.884781339642942
85.0	-6.1095631104359285	9.544278874775353
86.0	2.6543232088211615	0.6560922100767365
86.0	-2.578916092731833	0.9725526604286339
86.0	-0.0754071160893105	-1.6286448705053922
87.0	-0.7599794603314707	6.375687274476821
87.0	-8.003674345384633	-6.080012390403842
87.0	-0.1928864822628107	-14.042688048150929
87.0	6.876669391806557	4.695847574762102
87.0	2.0798708961723715	9.051165589315847
88.0	0.03769397959501973	-0.08124019590561936
88.0	0.038117366729600616	0.13381447214524994
88.0	-0.0758113463246135	-0.0525742762396286
89.0	7.440411939940535	-10.508911527889918
89.0	3.394979037572695	3.3484681992910956
89.0	-4.733226917660321	12.733099852509232
89.0	-13.350512170750504	5.71339969097315
89.0	7.248348110897592	-11.286056214883581
90.0	6.257451966163603	-13.97606280637231
90.0	6.265882323088088	-7.939874119384928
90.0	5.714958627769268	3.755982850495597
90.0	-4.212588413423433	10.330970070169709
90.0	-14.02570450359752	7.828984005091917
91.0	-0.8690367481425931	-5.220071051763514
91.0	4.84371384813058	7.969642801974092
91.0	-3.9746770999879826	-2.7495717502105825
92.0	-1.3149884236811369	-2.768959229197679
92.0	4.716817297750823	3.5049864744671932
92.0	-3.401828874069688	-0.7360272452695062
93.0	-3.128342658889544	-7.128136841574557
93.0	2.8372841694176842	-4.316878866299601
93.0	5.471418470192771	3.6931167319214895
93.0	-5.180359980720899	7.75189897595268
94.0	-0.37921534151179537	-6.531432618442436
94.0	3.44852694061899	-4.299663856643292
94.0	0.8859651732138576	8.220545518634744
94.0	-3.955276772321051	2.6105509564509815
95.0	-2.6354452423517887	3.618058086544692
95.0	-4.837084120006967	-1.4426920026679133
95.0	3.5854263041911554	-3.453745006804609
95.0	3.8871030581676136	1.2783789229278264
96.0	-2.4801992521728153	0.4356057474779148
96.0	-0.19028455516498233	-3.0834995270470684
96.0	2.670483807337806	2.647893779569152
97.0	-14.94523822414039	-16.85608500377151
97.0	-10.212958417194569	-19.72653005218701
97.0	14.973876540419106	-1.2932769014224599
97.0	5.119738013645771	18.9193103432829
97.0	5.064582087270063	18.95658161409807
98.0	-0.44431120339866237	0.09716294526840102
98.0	-0.6128621629837155	-0.16018386855092254
98.0	0.2034306724518431	-0.49609251221401585
98.0	0.8537426939305487	0.5591134354965297
99.0	-7.740041548482456	3.8584632142011794
99.0	-12.244432229367305	2.516075985498369
99.0	8.205161541468552	-4.5052541615289545
99.0	11.779312236381234	-1.8692850381706103
100.0	-0.5407975354823097	0.22465898932819595
100.0	0.2711249305102126	-0.7243832510756305
100.0	0.2696726049721013	0.49972426174741486
101.0	5.048038132495957	0.3225196096126759
101.0	5.613970230213212	2.738213105061141
101.0	-3.802328889059331	0.2929707745117637
101.0	-6.859679473649853	-3.35370348918556
102.0	0.3871988867445292	0.10991888132165246
102.0	-0.8355461266594635	0.3970856549241637
102.0	0.4483472399149272	-0.5070045362458039
103.0	5.174456320633255	4.493616872408076
103.0	0.8469844257724759	2.8767743929509617
103.0	-5.000777838068884	-1.1544028059717761
103.0	-1.0206629083368464	-6.21598845938727
104.0	-0.7384222905040708	-5.321289163752249
104.0	0.9784595366755016	-5.318587154288548
104.0	-0.2400372461714308	10.639876318040795
105.0	6.634505192275309	0.8335849180197785
105.0	-0.5816335053698303	3.056632261351325
105.0	-6.05287168690545	-3.890217179371101
106.0	-0.123720023576711	0.025230481007703955
106.0	0.1254050140372585	-0.2582575334856281
106.0	-0.0016849904605711757	0.23302705247795155
107.0	-2.36343187213463	-0.925064106597596
107.0	5.374383786228608	-5.349695222990169
107.0	-3.0109519140939973	6.274759329587759
108.0	-0.3529345789340252	1.0026693423807813
108.0	-0.47096924006236573	0.6119066425527653
108.0	0.8239038189963939	-1.61457598493354
109.0	0.06201422680564061	0.3051657145695231
109.0	-0.16544517957522176	-0.03718722936691372
109.0	0.10343095276957515	-0.26797848520261747
110.0	-2.381904920768889	-0.5533160411974577
110.0	-2.046320091491526	-2.344030332709559
110.0	2.372360929704172	-0.130556804424526
110.0	2.489368999241954	0.4584562354264665
110.0	-0.43350491668567126	2.5694469429051177
111.0	-14.42633634013038	6.437119586586628
111.0	-12.942728997889697	0.6822119591658904
111.0	13.39006091919684	-4.280971724033742
111.0	13.979004418823216	-2.838359821718771
112.0	2.1007939403435407	3.523686182243181
112.0	-1.0885752228524415	-1.5970436952028342
112.0	-1.012218717491095	-1.9266424870403607
113.0	2.0531995396753246	1.6166163387642087
113.0	-1.6165812978147902	0.3734610488266792
113.0	-0.43661824186054743	-1.9900773875908935
114.0	0.1251386665158871	0.1718416365548738
114.0	-0.045319095570197615	0.16317481828134311
114.0	-0.07981957094566106	-0.33501645483621656
115.0	6.465469748296766	-1.4068381562996053
115.0	-5.9976027347327	3.9689810683219244
115.0	-0.467867013564061	-2.562142912022318
116.0	-0.3480292106891203	-0.3218677294803164
116.0	0.23575112801007214	-0.4253737682934575
116.0	0.11227808267905166	0.7472414977737732
117.0	-4.665856412133545	-7.3767011314912
117.0	-1.2368048828122307	-7.299995346858836
117.0	3.1450471773154156	7.1620354158206885
117.0	2.7576141176303706	7.514661062529338
118.0	4.904959790599255	4.376671209683434
118.0	-3.2461277931498556	2.0355680079348626
118.0	-3.4780059518588464	-3.3263412803737435
118.0	1.8191739544094339	-3.0858979372445514
119.0	-2.7468437406239348	0.034836100691866934
119.0	2.875338987645713	-1.0717678411006704
119.0	2.669928497764568	0.09781075443482123
119.0	-2.798423744786365	0.9391209859739816
120.0	-3.101487168136611	1.7960559514483623
120.0	-5.4839621012524695	0.0003973304885021012
120.0	0.06494707563145252	-3.363413172910506
120.0	8.520502193757602	1.5669598909736564
121.0	-3.184350878596465	-4.445215494897178
121.0	2.3830603692074113	-3.9167717378667932
121.0	0.8012905093890539	8.36198723276397
122.0	2.622229254145005	-2.3106440349210478
122.0	2.1735966514152896	1.1087877556103796
122.0	-1.7498710606564902	2.492866929357429
122.0	-3.045954844903802	-1.2910106500467455
123.0	5.907138947582146	-6.393758359060433
123.0	9.15786447025141	6.8641370825507435
123.0	-7.619380119238786	-0.03808315784442273
123.0	-7.4456232985947794	-0.4322955656459073
124.0	4.797592292565342	-1.0384274190391
124.0	-7.129676212081258	6.761397664685648
124.0	2.332083919515925	-5.722970245646537
125.0	-3.0806147331109206	-3.0436313989151444
125.0	6.875459427333604	4.665906402181151
125.0	-3.7948446942227028	-1.622275003266002
126.0	1.4408029935261708	3.896989171360285
126.0	-8.592684631933226	-2.58464719681238
126.0	7.151881638407044	-1.3123419745478937
127.0	-1.6921668127265783	-1.3134631102365224
127.0	-0.8520748370535237	-1.9497439361409459
127.0	3.7630163513577912	3.459730910013384
127.0	-1.218774701577699	-0.1965238636359169
128.0	-4.3382559650532935	6.345588892156236
128.0	1.466169270075139	-5.836618029783361
128.0	2.8720866949781856	-0.5089708623729043
129.0	0.06880839110121229	-3.003012632340979
129.0	2.7879256712070832	-0.8931933451458363
129.0	-0.039162313373541036	3.6482037020403597
129.0	-2.8175717489347174	0.24800227544647724
130.0	1.9177227410460511	-8.429194314983341
130.0	6.918655747144221	-6.1107947371802345
130.0	-2.881664588577635	11.789929284034452
130.0	-5.954713899612638	2.7500597681291223
131.0	-0.2432437529241635	-0.13401693023227823
131.0	0.21491988491525105	-0.14778411748600823
131.0	0.028323868008907658	0.28180104771822984
132.0	2.0431250720364362	-4.83279185762523
132.0	1.398109798597364	2.205843023783004
132.0	-3.441234870633796	2.626948833842245
