# Supplementary material
Source: ML conference proceedings conference paper supplement (https://openaccess.thecvf.com/content/CVPR2021/html/Harel_Crossing_Cuts_Polygonal_CVPR_2021_paper.html)
Supplement: Supplementary file 2 [file Harel_Crossing_Cuts_Polygonal_CVPR_2021_supplemental.zip › Dataset/D3/p1/pieces.csv]

piece	x	y
0.0	4.8857848464335785	-5.491503181220852
0.0	-2.508188536719387	6.566913594391778
0.0	-5.059126212775719	6.149678198309906
0.0	2.6815299030615236	-7.225088611480835
1.0	-7.030615351266847	4.90713599072728
1.0	-6.2352724623917695	-10.977767783444158
1.0	-4.58615278486203	-10.18975990941833
1.0	10.973845474406437	5.4160711707226845
1.0	6.8781951241141845	10.84432053141254
2.0	9.636815978116195	21.024165206841168
2.0	4.584575124480022	24.385428659209037
2.0	-18.957988514117325	-16.145941937507942
2.0	-7.105022827492163	-17.017916223825804
2.0	3.563926743464284	-10.066193342781387
2.0	8.277693495548974	-2.179542361935065
3.0	0.49798700937689344	-3.9586269823535547
3.0	3.6659631258214214	2.389876997247916
3.0	-4.16395013519832	1.5687499851056348
4.0	-1.6628522560363286	-1.1420331791923555
4.0	-0.380131212514626	-1.7331261142489698
4.0	1.4446456329816408	0.917268421384949
4.0	0.5983378355693088	1.9578908720563548
5.0	-0.03172667606988672	-0.4844287235317688
5.0	0.7405010854949259	0.4882519846376707
5.0	-0.7087744094250401	-0.0038232611058919286
6.0	-0.5298768553160803	-0.7432627376793
6.0	-0.0008808515149187346	-0.760776005270156
6.0	0.5307577068310019	1.50403874294947
7.0	-0.9196519511407133	-0.5422405128487825
7.0	1.327695737713888	-2.2559442273802723
7.0	-0.4080437865731746	2.798184740229054
8.0	0.27770525084819275	3.8287784432691545
8.0	-1.697595617861103	3.5819840485671746
8.0	-2.4165974890560733	-2.8869989972346173
8.0	0.9221176625832852	-5.344829752129834
8.0	1.923328339206372	-2.2478579857602017
8.0	0.9910418542792978	3.0689242432883237
9.0	-7.572248832386274	-3.0234584097009205
9.0	5.082956947504109	0.23738572256968893
9.0	5.3477477448557655	1.6905605879147942
9.0	5.167441925903927	2.249190365618986
9.0	-8.025897785877532	-1.1536782664025935
10.0	-6.0159410481836915	-3.287476015142362
10.0	-2.8072112776204494	-6.122417045405094
10.0	8.823152325804156	9.409893060547489
11.0	-8.067176491721739	1.5388497328584951
11.0	-1.143395270861041	-13.114167353930686
11.0	9.683615934383127	0.3859236695853241
11.0	-0.47304417180034	11.189393951486856
12.0	1.8618781211499398	-1.5833344450219018
12.0	2.2037703974741767	1.9463689232342005
12.0	-4.065648518624114	-0.3630344782123056
13.0	-2.28991805393799	7.220929780620592
13.0	-7.10790378652444	-6.747336978371835
13.0	-3.4849505226203448	-8.004642920547095
13.0	6.289341556395009	3.455269758039372
13.0	6.593430806687785	4.075780360259021
14.0	-7.713427720876053	-4.272548173662711
14.0	0.7769497520067032	-9.148843539044755
14.0	19.14377960846082	-11.727676092157992
14.0	13.060086780092039	9.077060676422608
14.0	-10.684302135278235	14.693929838277526
14.0	-14.583086284405276	1.378077290165323
15.0	0.37537687693873656	2.0143827925331217
15.0	-0.016945908858133185	2.112409295276247
15.0	-0.9931597287128535	-1.2041512794148839
15.0	0.6347287606322506	-2.922640808394484
16.0	2.1247980789775958	2.022610462856883
16.0	-4.5301291545761355	-0.8874242741656146
16.0	-0.45427834960049573	-3.1358662280811527
16.0	2.859609425199058	2.0006800393898976
17.0	-3.870687098481674	0.9293922998809476
17.0	2.673991497752749	-6.717485230986526
17.0	1.1966956007289165	5.788092931105575
18.0	-7.539030096177274	3.584196944135772
18.0	4.272526281711404	-4.255043481361506
18.0	7.245314891070748	-4.862999616550406
18.0	-3.978811076604879	5.533846153776147
19.0	-0.9306638366948577	-2.239160742790445
19.0	3.324255317369059	2.658456898331794
19.0	1.0276886873825084	2.4727520178608033
19.0	-3.42128016805672	-2.892048173402154
20.0	0.632654617541423	1.7462903942405301
20.0	-1.2811697490658942	1.3724745202577044
20.0	-0.6662252531982147	-1.5296730369594884
20.0	1.3147403847226888	-1.58909187753876
21.0	0.8785513843498323	-0.26623276341850644
21.0	-0.6241523884457918	0.32533251926176787
21.0	-1.100042679574829	0.2400547145530091
21.0	0.8456436836707872	-0.2991544703962635
22.0	-5.747864450636843	-2.2873171042037823
22.0	4.311926746201073	-3.9992546428002327
22.0	5.982979174678706	4.467183740186787
22.0	-4.54704147024294	1.8193880068171837
23.0	-0.16835441957772362	0.34131682927353374
23.0	-0.5240894540770996	-0.3497815153550457
23.0	0.6320343536742137	-0.38199038928133816
23.0	0.06040951998061386	0.3904550753628443
24.0	-3.837860371630592	0.5274494998863264
24.0	-0.7868359758671893	-6.16406342494723
24.0	-0.28230523578349653	-6.0785723445129625
24.0	4.907001583281283	11.715186269573845
25.0	-0.3706419013921123	-19.952396721188453
25.0	1.5402015245087317	-21.321209474453067
25.0	6.889980916225961	27.90500435075103
25.0	-8.059540539342581	13.368601844890492
26.0	-2.763417130614576	1.425427467344701
26.0	-4.136552880799132	-0.2729574808413838
26.0	3.3444203391303122	-1.5117496975226836
26.0	3.5555496722834086	0.3592797110193503
27.0	7.001596564017753	-1.1717551246115188
27.0	-3.777728999477903	3.7656268596921807
27.0	-3.223867564539835	-2.5938717350806675
28.0	8.885968040584334	5.437892740743239
28.0	-8.907248391157113	2.1468835656802536
28.0	-9.509463389037247	1.1094229520248187
28.0	0.11173525401123507	-11.58164600127776
28.0	9.419008485598821	2.887446742829455
29.0	-6.223348254270899	-9.002026713689242
29.0	10.814035524123003	0.9228604130487472
29.0	7.13055018764667	4.1414497027168204
29.0	-11.72123745749877	3.937716597923675
30.0	3.5209217052289823	1.7937548576319957
30.0	-2.3004867400414395	2.4787246968719927
30.0	-2.879088235454932	2.09909726818596
30.0	-1.087657319098675	-3.405726127270786
30.0	2.7463105893660353	-2.9658506954191632
31.0	0.3644206628096839	-1.513399263346383
31.0	1.3021884992340316	1.5159645259176384
31.0	-1.666609162043701	-0.002565262571248006
32.0	0.03177430918764773	-1.0470662432199829
32.0	0.7443990430234069	0.6500953856907328
32.0	-0.7761733522110734	0.39697085752927563
33.0	-11.906692008938592	-21.17219260722706
33.0	-10.461262832647789	-21.32574613278807
33.0	21.05037241067719	18.489747771032924
33.0	11.126238220266728	25.67888308988994
33.0	-9.808655789357443	-1.6706921209077463
34.0	-1.532736368707606	5.6997653684689205
34.0	-14.876268458403548	-0.7463925793054393
34.0	-12.76183929247567	-7.395269785758252
34.0	1.937853979953823	-5.502545016244915
34.0	13.50583160817975	3.691249559318977
34.0	13.727158531453245	4.2531924535206755
35.0	-2.2581407136498823	-0.7701018271265287
35.0	2.0276830616594324	-1.2635531901783592
35.0	2.4074384829749107	0.26071383634091483
35.0	-2.1769808309844594	1.7729411809639803
36.0	2.965530341144241	-1.0137873022039285
36.0	2.698071000228177	0.3922114046830534
36.0	-5.663601341372416	0.6215758975208772
37.0	-3.096627310972879	-5.820530978514212
37.0	3.6804341785793047	-5.533945416482597
37.0	0.9356179058973346	8.955859986509225
37.0	-1.5194247735037556	2.398616408487595
38.0	-1.0051605355984021	2.724036074357522
38.0	-1.0284081958934088	0.16466310461969969
38.0	0.5185683991078088	-1.9448369474581255
38.0	1.5150003323840076	-0.9438622315191001
39.0	0.34561177141508237	-6.95370797485104
39.0	2.3086147528312058	-5.94754288583596
39.0	-2.6542265242462886	12.90125086068699
40.0	10.608941110351505	1.1224025520013488
40.0	-6.458339967086877	3.090029454760872
40.0	-8.208716987814956	-0.3348727204948667
40.0	4.058115844550332	-3.8775592862673585
41.0	7.3463829712391995	3.6453324127249234
41.0	5.7772945663231035	6.444172242762415
41.0	-6.496591540619589	4.321869482233076
41.0	-10.344852573154228	-5.43974408427688
41.0	3.7177665762114955	-8.971630053443494
42.0	6.485398429562608	0.8510746376504742
42.0	-6.326027784720146	1.2474339122424283
42.0	-0.15937064484244837	-2.0985085498928964
43.0	-1.842015223537804	-1.4678910520312178
43.0	1.8518267149179997	-3.2810164861744644
43.0	1.387233887521261	2.6096306150472057
43.0	-1.3970453789014567	2.139276923158478
44.0	-5.845518789938003	4.420634749564235
44.0	-1.7638161404269024	-10.880925537100115
44.0	5.1676772870436185	-4.918101382562728
44.0	2.4416576433212818	11.378392170098605
45.0	11.852028101794774	-4.8853906706207555
45.0	2.7985912176123486	17.75427308233191
45.0	-9.393299617743384	2.5229380252607894
45.0	-8.60268939470969	0.5708302926643167
45.0	1.1059455096080693	-7.821705673171432
45.0	2.2394241834378863	-8.14094505646477
46.0	10.277771740672634	-0.4509565600797689
46.0	9.098058762199088	18.375045414231455
46.0	-11.728952990317646	-8.723717956802467
46.0	-7.64687751255408	-9.200370897349227
47.0	-11.44025682039708	3.161865026694686
47.0	10.069180534954128	-4.7008269607772695
47.0	11.723987818381845	-3.277803110599002
47.0	-10.352911532938876	4.81676504468161
48.0	6.507972430851611	2.4190161432908464
48.0	-7.124656919889049	11.407771737137864
48.0	-12.36427775175087	3.606067277178659
48.0	4.3486554480654505	-10.755776693896149
48.0	8.632306792722801	-6.677078463711177
49.0	2.930850690171912	6.811045658018554
49.0	-9.669953747424833	-8.086836356675489
49.0	-0.6031638633995375	-12.739653998400106
49.0	4.078837776484122	6.918901200674903
49.0	3.2634291441683496	7.096543496382076
50.0	0.8808871828320971	4.05931083522496
50.0	-1.4916651195113122	1.0393133233842595
50.0	0.15160304029787308	-2.6787397807440505
50.0	0.4591748963813471	-2.4198843778651686
51.0	7.754218689305126	5.563006954422251
51.0	-10.683000139520988	5.011838833106129
51.0	2.9287814502158587	-10.574845787528366
52.0	-8.545651105044348	-1.6835690055395767
52.0	6.411273943651487	-2.4026894954123303
52.0	7.547908821073376	-1.1050886519438308
52.0	5.201442106434341	3.082818154848603
52.0	-10.614973766114872	2.1085289980471007
53.0	-2.8609679822830056	15.151592296854732
53.0	-9.59437252167758	10.455119366914584
53.0	-0.2860125055258873	-9.606345473396086
53.0	1.2815155859562521	-11.256193891180802
53.0	1.5141534716054812	-11.272074494480496
53.0	9.94568395192474	6.527902195288069
54.0	6.4778087209301765	-6.889825409168161
54.0	-5.334595732189833	9.131961884156615
54.0	-5.0742155368736865	5.290160038395945
54.0	3.931002548133351	-7.532296513384407
55.0	1.5034958715726288	3.947717568690587
55.0	-2.778129147240216	-4.824845042216208
55.0	1.2746332756675933	0.8771274735256009
56.0	10.101970719510936	4.031456447641118
56.0	-9.553315820475245	8.444122672235348
56.0	-10.001513088415278	8.47456886301148
56.0	-2.47216519503687	-9.585023186997237
56.0	11.925023384416452	-11.365124795890724
57.0	7.505959583830162	3.2052515219226354
57.0	-5.243112201216526	7.956752206963753
57.0	-4.62133616432975	-5.923692657268331
57.0	2.3584887817161015	-5.238311071618023
58.0	2.151881569956001	2.6789544871052153
58.0	-2.0702229512666355	-0.8828381579962116
58.0	-0.08165861868938129	-1.7961163291090039
59.0	-1.1074825911632633	-13.235836164297314
59.0	10.124348687297944	2.8517874144380886
59.0	11.030957332950212	5.081567858060256
59.0	-5.812182567038091	9.286680438289846
59.0	-7.995228114256388	6.721694976470399
59.0	-6.240412747790412	-10.705894522961277
60.0	-3.1756833452276436	2.473527904044233
60.0	-7.050416245526893	2.3427408470079496
60.0	6.174410094694866	-4.012809158143218
60.0	4.0516894960596845	-0.8034595929089633
61.0	-3.092993283891812	-5.175865620876097
61.0	5.0348820144217346	-4.424529055652535
61.0	-1.94188873052993	9.600394676528643
62.0	5.0728210020313576	-2.5736279619838323
62.0	7.053664775233102	-1.7837159890512084
62.0	-6.935322502142827	8.650825049105132
62.0	-5.19116327512163	-4.293481098070088
63.0	-0.2795701078754279	0.5672225443281506
63.0	0.144011128439192	-1.519909622839418
63.0	0.13555897943622303	0.9526870785112613
64.0	4.927118534868116	10.405026576635056
64.0	3.941833622762995	10.738264468401423
64.0	-6.7661591267905665	-2.325289726652625
64.0	-4.517813564636645	-9.095010712150597
64.0	2.4150205337961066	-9.722990606233273
65.0	0.04283782953011829	-0.1804541220917884
65.0	0.29398188817489757	0.30540287908403657
65.0	-0.3368197177050365	-0.12494875699225706
66.0	6.38985508329099	-7.17253945135576
66.0	-2.1782438936287822	5.1035895891981315
66.0	-4.211611189662253	2.0689498621576634
67.0	-2.6332832008122455	2.252646004785476
67.0	0.769322937528801	-2.534356224134256
67.0	1.1651513740412782	-0.20023509290058084
67.0	0.6988088892421654	0.4819453122493697
68.0	-7.1778890180704	1.2088176318465083
68.0	-7.441641384497441	-4.107907390455254
68.0	7.3747904886141225	0.3844630971918215
68.0	7.244739913953727	2.514626661416896
69.0	2.310831734475455	-0.599149978397607
69.0	-1.5481593970741496	2.8768420139038278
69.0	-1.9534548684758193	2.4711336946303843
69.0	1.1907825310745226	-4.748825730136574
70.0	-9.897092108672137	-0.7769312958648111
70.0	-11.46915955760812	-5.4805859184746275
70.0	8.876996748952273	-0.9300423965862912
70.0	9.870729383750898	0.353041896352992
70.0	8.280991570001166	3.367302619203447
70.0	-5.662466036424081	3.4672150953692893
71.0	-5.357223272330785	-2.7883868520808233
71.0	-3.2212098449326008	-4.161029192383728
71.0	6.840900729000195	-8.015882931453401
71.0	15.114856424505913	3.899939194475712
71.0	-6.486986866810558	5.875122081951385
71.0	-6.890337169432143	5.190237699490901
72.0	5.4719223450522225	-3.648585806955335
72.0	4.324954209142886	-0.3627985261536044
72.0	1.0922929134805313	2.7132688598524983
72.0	-2.6108187831673995	2.708431096152566
72.0	-8.278350684508258	-1.410315622896138
73.0	-0.07730516552207656	-1.299989914719953
73.0	1.9934665260939355	-0.818267674707184
73.0	0.07831978548843743	2.272197724121207
73.0	-1.9944811460602847	-0.1539401346940522
74.0	11.789345788595137	9.540621769812073
74.0	-10.576809996253361	-0.44009452434940766
74.0	-13.91859372123543	-4.165542235691147
74.0	-3.2705074146119326	-13.368517292313985
74.0	15.976565343505499	8.433532282542515
75.0	-3.7961605210274807	-0.5126579440530417
75.0	0.1264166335102046	-1.4836647324082701
75.0	3.669743887517275	1.9963226764613133
76.0	4.666115539162362	-5.518882252666317
76.0	3.6688469430076673	-0.4087182713904287
76.0	-1.559049312438665	6.50133393916145
76.0	-4.028923528572608	1.4195655461776189
76.0	-2.7469896411587653	-1.9932989612823429
77.0	1.371038281663798	-1.2575762707405787
77.0	0.5573750916935722	1.0874646374121644
77.0	-1.928413373357368	0.17011163332840762
78.0	0.7792616370718064	0.21329239100480973
78.0	-0.05308496456853823	0.757698050327827
78.0	-0.726176672503263	-0.9709904413326235
79.0	10.303594460112013	10.697685698457475
79.0	-1.5045538451684788	21.445643161068695
79.0	-13.139527301286403	1.0176275401265809
79.0	-7.065931749524424	-9.220206138655163
79.0	2.2457335872581963	-13.885292181477075
79.0	9.160684848609089	-10.055458079520491
80.0	7.659279994526632	-1.9473353718272333
80.0	-6.199653696290669	4.055377098056146
80.0	-6.466482245217581	2.626279121298474
80.0	5.006855946981611	-4.734320847527383
81.0	-1.1427367399272252	7.334088935014736
81.0	-5.119585196821133	-2.0755289337654967
81.0	0.10993479946433224	-5.125384135808051
81.0	2.0547911399551424	-5.068851744091407
81.0	4.097595997328927	4.935675878650206
82.0	0.1272276089458435	4.763040743688982
82.0	-3.4990566212936116	-4.945463185299968
82.0	3.3718290123477734	0.1824224416109994
83.0	-0.5056626531154911	1.1948439645501268
83.0	-0.09397200948959242	-0.5259189067281534
83.0	0.5996346626050748	-0.6689250578219845
84.0	1.0591505976714766	1.95939453670276
84.0	0.29466004011419844	2.830642593824325
84.0	-1.392937114893435	-2.1759025185113017
84.0	0.03912647710775263	-2.614134612015814
85.0	1.2914323797245926	-5.626459454629247
85.0	4.052665695385284	6.182882562144505
85.0	0.7479260541624534	6.911147312487206
85.0	-6.092024129272327	-7.46757042000245
86.0	-5.698893785022404	2.3254350189245003
86.0	-3.8421032624416473	-1.6407103360225872
86.0	4.784714948796597	-1.7345449833171631
86.0	4.756282098667467	1.049820300415224
87.0	-1.7125870842328197	-4.911577612192067
87.0	12.907345840645831	4.187748591983789
87.0	-11.194758756412991	0.723829020208326
88.0	3.1394324109749547	0.2734285193756929
88.0	1.5927909412973515	2.5218515652859392
88.0	-3.1660668057834513	-0.640257740414685
88.0	-1.5661565464888345	-2.155022344246926
89.0	0.9257311076418029	-8.478468832780987
89.0	5.151722791435893	-4.907813798853183
89.0	2.363092950720957	11.373458204992058
89.0	-8.440546849798633	2.01282442664211
90.0	-11.223783122151094	0.8531856137945946
90.0	5.321160897445397	-7.4601155636504615
90.0	6.715430510642303	-6.081412617747281
90.0	8.21631206400264	0.43946348250720835
90.0	3.8402744262568183	3.940482823552143
90.0	-12.869394776196087	8.308396261543743
91.0	-2.1654954920520755	-8.796353943477788
91.0	4.438420253316946	9.616320249851453
91.0	1.6191379392883087	7.323006450543206
91.0	-3.8920627005531516	-8.142972756916876
92.0	-7.960349440114687	4.795426142080487
92.0	-8.028584746793523	4.650074350507231
92.0	-6.164603245785674	2.9284382993168214
92.0	10.73254850328572	-6.699998107899168
92.0	11.420988929408244	-5.6739406840054
93.0	4.308269440006781	1.7460570349727051
93.0	-2.739678063179612	4.123169533715743
93.0	-1.2515030039445376	-2.467644931824913
93.0	-0.31708837288261194	-3.401581636863514
94.0	0.7151208278688553	-1.8625540859102228
94.0	0.29444234515100254	1.820938397908853
94.0	-1.0095631730198713	0.04161568800137616
95.0	-4.392145039560196	6.60256632805657
95.0	-4.114192885941258	-5.735095537126613
95.0	8.50633792550147	-0.8674707909299659
96.0	0.9924948065263134	0.3902891803417561
96.0	-0.4164180936027213	2.0074604796705398
96.0	-0.5760767129235989	-2.3977496600122916
97.0	-2.561731997789038	0.7780854337594305
97.0	1.640450410859411	-6.732685571480811
97.0	0.9212815869296196	5.9546001377213695
98.0	-0.7786465537589526	14.46716806550673
98.0	-4.76420656194025	2.1363716447150525
98.0	2.5193689573903155	-8.217720190762567
98.0	3.023484158308915	-8.385819519459211
99.0	11.086641504942849	4.707105885060977
99.0	3.8552476105922646	9.420094672345776
99.0	-6.4635041802574245	9.488594069854175
99.0	-8.478384935277672	-23.615794627260907
100.0	-2.2402510312816317	-0.527030663034738
100.0	0.8996804669618689	-2.3049346871506082
100.0	3.4115848347344775	1.1267904825467039
100.0	-2.071014270414717	1.7051748676386143
101.0	-6.07085273087917	1.2595968083395486
101.0	-4.238783665267512	-8.408291043305498
101.0	4.512126990529652	1.1693981899953023
101.0	5.797509405617041	5.979296044970637
102.0	-0.41286793030078384	-0.4119692100517999
102.0	0.3075256809767705	-0.01689894864826111
102.0	0.10534224932401051	0.4288681587000675
103.0	-7.463726088772357	-5.567331133609148
103.0	3.349719932752244	-3.317030996240366
103.0	8.34658147484858	2.7803340624370145
103.0	-4.232575318828483	6.104028067412489
104.0	-1.2568675705459431	-8.27367614426286
104.0	1.274095872799534	-8.434500355331828
104.0	9.16947475066814	5.69810395661577
104.0	-4.063071417384564	6.298550355373145
104.0	-5.123631635537182	4.7115221876058175
105.0	-4.348507893650408	5.82886046354605
105.0	-6.342544216141671	0.8738082123410598
105.0	-1.8354974394018078	-5.107215356173068
105.0	5.270536222035314	-3.4160049655093596
105.0	7.256013327158587	1.82055164579532
106.0	0.3170754752690471	-0.09769346178839633
106.0	0.06776512070315324	0.2895551468978028
106.0	-0.3848405959721817	-0.1918616851093961
107.0	-0.01752823634696675	0.08818899254317535
107.0	-0.10151502835904508	-0.032813849048273884
107.0	0.11904326470601893	-0.05537514349488916
108.0	-13.012964105788202	-6.4111253183306065
108.0	8.095980113862115	0.10591804315333908
108.0	4.916983991926102	6.305207275177263
109.0	18.921205714742033	-12.584150405293377
109.0	-17.479216992326947	16.973727332192198
109.0	-18.531188640584716	15.90708054966105
109.0	17.089199918169626	-20.29665747655991
110.0	0.9070967309605156	-0.09240975407255989
110.0	-0.495845522799371	0.3371568845034567
110.0	-0.41125120816117583	-0.24474713043087165
111.0	-3.454229680259629	1.0846493937469939
111.0	2.7529727750705923	-1.4888564272215015
111.0	3.6862287137282905	-0.7800496228488419
111.0	-2.9849718085392896	1.1842566563233865
112.0	-0.16089012527933555	-0.1440177851141455
112.0	0.42002843238498117	0.13997060084295654
112.0	-0.2591383071056228	0.004047184271206039
113.0	2.073639937048958	-3.561929164956106
113.0	0.3334310238319588	4.355099854858168
113.0	-2.4070709608809198	-0.7931706899020554
114.0	-0.10708988377722428	1.5532904072780975
114.0	-0.6976983844196661	0.9774352504575659
114.0	-1.1896907516530681	-1.7916594187861818
114.0	1.994479019849968	-0.739066238949492
115.0	0.5568472858716704	-1.3216015591921693
115.0	1.4559634833166746	-0.42549285227611366
115.0	-0.4422655426833173	1.240448476244839
115.0	-1.5705452265050457	0.5066459352234558
116.0	0.1368800332022227	0.03188911089281693
116.0	0.09080128381988684	0.05294453031350176
116.0	-0.2276813170221032	-0.08483364120633329
117.0	6.19747890076296	6.190232826701867
117.0	-4.69354817487755	-3.921001959620605
117.0	-4.2965575804251035	-4.285958579139268
117.0	-3.650168916120106	-3.9245804974144467
117.0	6.442795770659772	5.941308209472402
118.0	2.7023265169653974	-0.7392436201055674
118.0	2.758877911805299	0.815714357331794
118.0	-2.9116520138118163	0.18465843377209668
118.0	-2.5495524149588844	-0.2611291709983323
119.0	-2.7294029941814344	-2.6219937971286345
119.0	6.192042446513912	3.2769486595282546
119.0	-3.462639452332457	-0.6549548623996397
120.0	-4.284152640337755	-0.5841456613908915
120.0	-0.7913505996794361	-2.137055812664006
120.0	3.652622895258104	-1.2685235838283018
120.0	1.4228803447590834	3.9897250578831884
121.0	4.160061278184701	-1.8446034064384533
121.0	-3.394232027853103	3.155367298374039
121.0	-0.7658292503315963	-1.310763891935585
122.0	0.3681286276922571	0.4181352208854813
122.0	-0.20171784864865128	0.048126472051274904
122.0	-0.166410779043602	-0.4662616929367622
123.0	3.783289007639244	2.5869515841999235
123.0	-2.723236332347473	2.7190415301224315
123.0	-1.060052675291775	-5.305993114322335
124.0	-2.0039655558316625	18.825697227870403
124.0	-3.375022821123741	15.428178817197585
124.0	1.778504615710305	-17.32227362676867
124.0	3.600483761245124	-16.9316024182993
