# Supplementary material
Source: ML conference proceedings conference paper supplement (https://openaccess.thecvf.com/content/CVPR2021/html/Harel_Crossing_Cuts_Polygonal_CVPR_2021_paper.html)
Supplement: Supplementary file 2 [file Harel_Crossing_Cuts_Polygonal_CVPR_2021_supplemental.zip › Dataset/D3/p2/pieces.csv]

piece	x	y
0.0	0.03157567783948934	-0.6779573812236024
0.0	0.23206223756392538	0.9192961670253699
0.0	-0.26363791540340653	-0.2413387858017791
1.0	-7.996047331152254	-3.9984348270849943
1.0	-8.010560790552164	-4.625095767435379
1.0	-3.423465978643164	-5.3237034650647335
1.0	9.813447347895261	-0.9348668813185674
1.0	7.861673356134692	2.3966753009456725
1.0	1.0353195233097736	6.324884458301921
1.0	0.7196338730079	6.160541181656051
2.0	1.396970884348267	-0.025806980173599538
2.0	0.8695488223134783	1.3994886395802015
2.0	-1.8021977621781178	1.2232932973000141
2.0	-0.4643219444836221	-2.5969749567066245
3.0	-4.9306276368308755	-2.30569234080701
3.0	-3.3384680390999493	-4.766762241364873
3.0	7.935630875905603	-0.11054114562412164
3.0	5.405264321143159	8.400092789843882
3.0	-5.071799521117942	-1.2170970620478805
4.0	-2.5097360134878985	6.529440776761927
4.0	-8.567013715639371	-0.8956878115544729
4.0	3.7710202750146773	-7.83919949846148
4.0	7.3057294541125914	2.2054465332540256
5.0	-0.30771777089013946	-3.789212708316173
5.0	1.780005978926006	-1.7510653845875
5.0	-0.292249166747903	2.690640965456538
5.0	-1.180039041287972	2.84963712744714
6.0	1.255614704346499	2.594538310567324
6.0	-2.0606535826564585	0.3256724940172317
6.0	-2.2304973211107986	-2.6393377778295135
6.0	1.2994719843141755	-1.0773618485596372
6.0	1.7360642151065901	0.7964888218045884
7.0	2.5044413751864187	-1.3500165734779643
7.0	2.9083858221937384	1.1907706335689463
7.0	-3.605380281315155	1.7284137815017409
7.0	-3.6614571430114506	0.5044956401920366
7.0	1.85401022694644	-2.073663481784755
8.0	6.311952635758963	8.50891137275244
8.0	-7.377145467695397	4.424788714182521
8.0	-8.657056375312935	-11.142255109421187
8.0	9.722249207249371	-1.7914449775137702
9.0	-15.898342305144535	-13.579785107707488
9.0	-7.932799651455117	-14.091885376830708
9.0	7.844285853506347	-10.339024843753112
9.0	7.340997730552929	11.095886937455921
9.0	6.084584896072117	13.211656897956894
9.0	2.561273476468263	13.7031514928785
10.0	-0.6748251722027767	-1.6223634398651845
10.0	1.544914449418926	-1.3104814938081502
10.0	-0.8700892772161393	2.932844933673335
11.0	-0.5739268447416671	0.07385976166807257
11.0	0.1751893890081157	-0.6377397351780822
11.0	0.39873745573355146	0.5638799735100096
12.0	-5.238367760308717	-4.644402296245906
12.0	6.300663577427841	1.1890155896263839
12.0	4.90194367027507	2.051332703787265
12.0	-5.964239487394194	1.4040540028322652
13.0	2.273519829902183	14.429130380992005
13.0	-6.3324493440974425	12.027538754981007
13.0	-10.65756413276838	-9.982530181147716
13.0	-10.187257817222106	-11.055724812263861
13.0	8.542126445173164	-13.522497319360673
13.0	10.104785819517662	-1.6087704891241865
13.0	6.25683919949491	9.712853665923422
14.0	0.4963337885541191	-0.6513671154679784
14.0	0.41269534170571703	0.4835362498870191
14.0	-0.9090291302598265	0.16783086558095658
15.0	2.616517168016635	-1.7470371878556987
15.0	0.5680406628022531	1.7481833097470092
15.0	-2.294373619044605	1.2713842637611161
15.0	-0.8901842117742755	-1.2725303856524268
16.0	10.43696651286147	0.996934809846001
16.0	7.111685864996198	9.040519162900617
16.0	-13.690127032692821	0.4396953089265704
16.0	-3.858525345164861	-10.477149281673197
17.0	4.308306169682235	-10.646065673831494
17.0	15.98366504442674	-5.008576870801462
17.0	17.12731933964448	-1.618396042109293
17.0	-16.904111887857933	13.653173342846186
17.0	-20.515178665895522	3.6198652438960686
18.0	-8.249041773041405	-10.23935998784091
18.0	12.148592342080946	-1.7289940297087214
18.0	11.811444771916676	2.240447054897635
18.0	-1.2436461370498948	10.13685044092529
18.0	-4.342238044695556	9.605015525759352
18.0	-10.125111159210759	-10.013959004032662
19.0	-8.58993738943365	-0.3746126500571271
19.0	-9.002757212927259	-2.0504076818814907
19.0	5.053605179519662	-11.594787247203845
19.0	7.509082539227029	6.179456396257241
19.0	5.0300068836141705	7.840351182885187
20.0	-1.4804067440938826	-2.2073353291672193
20.0	0.5620453628790965	-3.1224551519443233
20.0	1.5029553701452765	2.047478967598102
20.0	-0.5845939889304979	3.2823115135134424
21.0	7.809889948738301	-1.0747996770981447
21.0	8.101035281874461	0.058819113454747995
21.0	6.82266100874824	1.7639542620631359
21.0	-12.27943320625745	2.1146896005609936
21.0	-10.454153033103564	-2.862663298980738
22.0	-2.573672479266234	-3.008862078363597
22.0	8.024693526379059	-0.5183166572469624
22.0	-2.8465091314135234	6.509148280530279
22.0	-2.6045119156993124	-2.9819695449197177
23.0	-4.4166345236834434	17.95085536452019
23.0	-5.1325756633619655	-19.30174996651899
23.0	3.9308396287637515	-18.54206556515969
23.0	5.678597854852009	1.6715846149124356
23.0	-0.060227296570387896	18.22137555224605
24.0	2.9143528591893912	-5.537078380354371
24.0	3.629961013879073	-4.588888255182279
24.0	4.173697203812241	-0.867047792310524
24.0	2.5357188042076952	17.077318102272756
24.0	-12.223059863613829	1.7335582671397252
24.0	-1.0306700174745935	-7.817861941565324
25.0	1.6000166862496257	1.3538205024621708
25.0	-1.72340048147244	0.4794437465028177
25.0	0.12338379522282775	-1.8332642489650048
26.0	-1.0627422260252193	1.6597235269422426
26.0	0.3048104881783241	-2.003662753247057
26.0	1.7312578999233923	-1.3751521114620633
26.0	-0.9733261620765131	1.7190913377668773
27.0	-2.0315886064484485	-5.65987974042289
27.0	0.18018556377327963	-5.211485747999827
27.0	5.833355656365204	16.211159028344454
27.0	-3.9819526136900074	-5.339793539921699
28.0	4.320034926564627	0.4410692387369463
28.0	-3.9592633899001686	2.0193914138515314
28.0	-5.1178753540778	-0.37697577261661364
28.0	4.757103817413345	-2.083484879971859
29.0	26.479862604919184	-8.584526171766099
29.0	21.528637964793216	9.267879070589304
29.0	-2.2210895946824145	9.321410217343887
29.0	-15.050941875122057	7.135510917575628
29.0	-18.18557569812459	3.2114265663281825
29.0	-12.519728315348242	-4.403034755618567
29.0	-0.03116508643517283	-15.948665844452343
30.0	1.1623263940444235	3.9621368360937086
30.0	-3.7913303581242364	-0.0484195224616583
30.0	-3.7573288449333977	-0.0824786412009196
30.0	6.386332809013205	-3.831238672431148
31.0	-1.0374969441455757	2.0905383781470848
31.0	-1.0586808426558085	-1.6182735995352784
31.0	1.5346232591335205	-2.977335426010141
31.0	0.5615545276678611	2.5050706473983277
32.0	-1.2191129292487213	4.429381303605554
32.0	-0.8630933546467849	-6.37823060635739
32.0	2.934812112198248	-2.7430119757626104
32.0	-0.8526058283027551	4.691861278514442
33.0	0.028379844507744126	0.1109536701637037
33.0	-0.05204569107117603	0.0508366236225504
33.0	0.02366584656343864	-0.16179029378624987
34.0	-0.41307907582584474	0.013026071086476606
34.0	-0.07362502449552084	-0.36829516136043505
34.0	0.48670410032136135	0.35526909027396414
35.0	1.396480469442045	5.518381090863405
35.0	-6.062476225360296	1.8483225765706626
35.0	1.7517732530271262	-5.277446684335073
35.0	2.9142225028911035	-2.089256983098985
36.0	-2.6178800355572838	-0.6352317251324937
36.0	1.2135681450370457	-4.867436616382429
36.0	4.068473429442715	5.360836409337391
36.0	-2.664161538922477	0.14183193217753143
37.0	7.360022227326544	0.3924112175609304
37.0	-2.017232299469161	3.7701903610631406
37.0	-4.396311017347893	0.44762418824702604
37.0	-0.9464789105094696	-4.610225766871077
38.0	12.02033934710011	8.117962353173587
38.0	-3.1444535189793004	5.596618326797229
38.0	-7.189628052300438	2.628203170266291
38.0	-4.62525216203278	-7.668115405874258
38.0	2.938994386212397	-8.674668444362853
39.0	2.09450481095482	-4.510958758152918
39.0	4.726151377991249	3.0190990319961113
39.0	-2.649546034931867	4.225971623458614
39.0	-4.171110154014202	-2.7341118973018035
40.0	-1.3690489434491644	0.07250347334563738
40.0	-0.44212881348096844	-2.2769360662544798
40.0	1.8111777569301348	2.2044325929088395
41.0	-4.97860828341948	2.309977463764754
41.0	-5.436105842221286	2.0248240871326106
41.0	9.758969534138613	-5.576528253772492
41.0	0.655744591502156	1.241726702875111
42.0	0.41749597440421304	2.0174253580280963
42.0	-0.6520911123241871	-1.433486669783369
42.0	0.23459513791997433	-0.5839386882447275
43.0	1.2200004127124533	-5.314294529067811
43.0	1.2170255761680528	5.414661741765997
43.0	-3.105782989054683	5.072611554377962
43.0	0.6687570001741661	-5.17297876707616
44.0	-4.4138722855795205	-4.692895637713963
44.0	-2.8984440694734266	-5.5341772720650955
44.0	7.936483688875249	-2.6031454403099525
44.0	2.808385017502434	5.949006179848958
44.0	-3.432552351324765	6.881212170240042
45.0	2.0177379515459943	5.376056156240163
45.0	-1.567958797895665	0.8507490217122197
45.0	-0.44977915365032833	-6.226805177952382
46.0	-1.0436117919405703	1.4232571167119028
46.0	0.07270654268461575	-0.7640603085142554
46.0	0.9709052492559644	-0.6591968081976496
47.0	5.690566408042204	-1.5488308013740617
47.0	-8.242910283046605	6.581914052982712
47.0	2.552343875004399	-5.033083251608642
48.0	0.2795257935177196	-0.11894069878255911
48.0	-0.26250250351615706	0.5524974212966798
48.0	-0.0170232900015685	-0.4335567225141245
49.0	3.070941819304428	3.619512367617186
49.0	-2.665946635655911	3.815366925848964
49.0	-0.21266630867146077	-3.7200389800815747
49.0	-0.19232887497704673	-3.714840313384574
50.0	0.37670937523180636	-0.9350862014251735
50.0	0.3668127376850339	0.7413554192955532
50.0	-0.7435221129168339	0.19373078212962347
51.0	-9.199084730252512	1.5419916444276538
51.0	-8.966529264022745	-1.3770158574477651
51.0	6.945240927156168	-1.5380973720439015
51.0	11.219130195286143	-0.2770644494591463
51.0	0.0012428718329346713	1.6501860345231665
52.0	-10.878001299083731	11.798927643970686
52.0	-14.02602499010487	-4.005457763240021
52.0	12.934677943269875	-9.369510905864912
52.0	12.51413379670814	-8.14475120632552
52.0	-0.5447854507893795	9.72079223145979
53.0	-4.806377521614441	0.1084170230844186
53.0	1.20556449387971	-6.034058849020543
53.0	3.4213937348467565	-6.919594694489595
53.0	1.0820461019559922	6.136922251253261
53.0	-0.9026268090680615	6.708314269172494
54.0	-15.753784069424926	18.424212293053635
54.0	-17.68306574771126	0.670097222645534
54.0	9.384034973139514	-16.52588934318242
54.0	11.966545289487325	-3.3830456055514153
54.0	12.08626955450935	0.8146254330346684
55.0	1.0243288899872567	-3.671164682598459
55.0	3.7938827391331356	0.7799347670257825
55.0	-1.3487092118377306	2.1643050146412297
55.0	-3.469502417282658	0.7269249009314507
56.0	-3.392997436284822	-0.9320774894997742
56.0	-1.3136379999381598	-7.7782967901431554
56.0	3.4997864432544343	0.3229631153032217
56.0	4.142817453777253	3.7076416405204786
56.0	-2.935968460808704	4.679769523819233
57.0	-0.606550691674157	-1.3647607408950955
57.0	2.098205850146493	-0.2275596149513771
57.0	1.1938066619799304	0.6812102227374983
57.0	-2.6854618204522493	0.9111101331089632
58.0	-2.6482701612989885	-0.6597765977434464
58.0	3.2913010462346306	-5.697124257309739
58.0	0.23713534306087103	3.2744585752087736
58.0	-0.8801662279965075	3.082442279844416
59.0	2.2642226320220686	-0.6912605115685533
59.0	0.012885012168085196	1.6563065636628918
59.0	-2.277107644190164	-0.9650460520943355
60.0	-2.6927295364037507	2.8446924412261096
60.0	-11.331322698628925	-6.614979737079843
60.0	7.241120610031186	1.5274287427539703
60.0	6.782931625001462	2.242858553099757
61.0	-3.214508810453418	2.2345961248731325
61.0	-4.423374446599369	0.4022483615542693
61.0	2.011790674954696	-3.42727314693554
61.0	5.626092582098087	0.7904286605081483
62.0	-4.161886553301871	0.747642068233779
62.0	-5.0526330606441086	-1.5495170949861319
62.0	9.214519613945983	0.8018750267523214
63.0	-1.5848309788134243	-0.44500763459151926
63.0	0.03007006602663066	-0.6623201826648032
63.0	1.5547609127867699	1.1073278172563068
64.0	0.14259671280551073	-0.5242008999676917
64.0	0.5813376111952798	0.9189701071127757
64.0	-0.7239343240007783	-0.3947692071450909
65.0	-1.4562376797139207	4.435719343423234
65.0	-1.434854565604767	-3.5222056496056204
65.0	1.5184172691717939	-3.27497053018883
65.0	1.3726749761468995	2.361456836371254
66.0	-1.19378766076859	0.18065723224622623
66.0	-1.4488231126092888	-0.4827095238220009
66.0	2.6426107733779154	0.30205229157579183
67.0	-10.397697307632544	2.170142270798562
67.0	-12.756467629323506	-1.5414966573850273
67.0	4.772989016828851	-1.824652151821114
67.0	6.454494615015465	-1.3691835458858377
67.0	7.856088374943684	0.8933693577788429
67.0	4.0705929301680275	1.67182072651459
68.0	13.466136925390554	7.9853523709403085
68.0	4.06959262156488	8.17048725514143
68.0	-15.059393037917305	-5.176379431958779
68.0	-16.8389947028723	-7.164339037614698
68.0	14.36265819383417	-3.815121156508267
69.0	6.446835489919352	11.919713796491056
69.0	-9.242621360518463	-4.014673529177634
69.0	2.7957858705991216	-7.905040267313426
70.0	-7.231447866763087	5.422476289574252
70.0	4.131291611835936	-7.348871646926083
70.0	4.8305334512555005	-7.1452186303396354
70.0	-1.7303771963283407	9.071613987691448
71.0	5.469710922995032	-2.2965043771113267
71.0	-0.7318718370601949	5.660098070665583
71.0	-2.3093078290222007	4.999832765890467
71.0	-3.752221711754872	0.6535535723299829
71.0	1.3236904548422321	-9.016980031774738
72.0	-0.3929241437039653	1.062555331972961
72.0	-0.5956466170600344	-0.08997821926815054
72.0	0.9885707607639997	-0.9725771127048105
73.0	1.2775208605745583	0.5251092640145646
73.0	-0.6700116615797762	0.09132965467252149
73.0	-0.6075091989947989	-0.6164389186870752
74.0	5.707933992130225	-3.787849781256194
74.0	5.790078582646553	2.2751046663672665
74.0	-4.816119035526705	3.2566217052086532
74.0	-6.681893539250075	-1.7438765903197329
75.0	6.8142035648819395	0.2523667556560398
75.0	6.702224824188879	3.893292658762229
75.0	3.1055982806280005	11.415154457169749
75.0	-8.93158351052911	7.7383377186240665
75.0	-7.080798505193825	-11.944733252230545
75.0	-0.6096446539758786	-11.354418337981553
76.0	0.14309678533358025	0.34814276562162005
76.0	-0.3037537352312525	0.7539915667455891
76.0	-0.3749466039018338	-0.31625341778699034
76.0	0.5356035537995044	-0.7858809145802472
77.0	-3.702609722873186	1.5803173144358325
77.0	3.1342430450666523	-3.154301347814645
77.0	3.7959744334683068	-1.0807349248752867
77.0	-3.227607755661762	2.654718958254108
78.0	-3.4964158223531356	-4.625877327092995
78.0	2.069240408457378	-3.726537386403461
78.0	3.8617637299885734	4.096556279650643
78.0	-2.4345883160928135	4.2558584338458205
79.0	-5.609684809793591	5.44120864161196
79.0	-4.222269431085419	-6.380459986280823
79.0	6.505898889092341	-4.7422499868365735
79.0	3.3260553517866507	5.681501331505442
80.0	-0.1424649690773656	-1.272529379251231
80.0	1.4463337141543535	-0.04007474759328777
80.0	-1.3038687450769808	1.3126041268445203
81.0	-6.888210836713783	-5.347303321654425
81.0	3.906432844659473	-3.5287710025747896
81.0	4.680720215696395	3.6184636124555882
81.0	-1.6989422236420997	5.257610711773629
82.0	5.046093519667168	-4.266228532370556
82.0	7.255538004187482	2.863651530206674
82.0	0.7829717543586524	4.555830955091617
82.0	-4.105649450929282	3.2396523054868167
82.0	-8.978953827284027	-6.392906258414546
83.0	-4.984305849472069	3.849406484288355
83.0	-6.009825031138445	0.9468962309146911
83.0	2.845351485803625	-5.819004263290723
83.0	6.405464601320374	-2.743053504382835
83.0	1.7433147934865256	3.7657550524704693
84.0	-2.7190294499463614	-1.9905345130658074
84.0	-1.4323330567030657	-4.676064993832474
84.0	2.981083858695729	-5.508165382900755
84.0	3.2183266816663516	3.9941571692738385
84.0	1.0016269519603658	7.846492610639759
84.0	-3.049674985673018	0.3341151098854612
85.0	1.7009584944412837	2.326232402110039
85.0	1.2857214169968665	2.8894719398069695
85.0	-1.1167858247868085	-0.4269554119058785
85.0	-1.869894086651334	-4.788748930011142
86.0	8.249206592116682	-5.834200998292043
86.0	7.807882277098575	-1.0303254054793904
86.0	0.7071446584585785	7.2332451797888515
86.0	-9.019820994695705	6.952782812465628
86.0	-8.328669144887916	-0.7696300413029986
86.0	0.5842566119096713	-6.551871547180063
87.0	-0.07693507017336308	-0.2102162432014999
87.0	0.3872610913862545	0.09838855855862577
87.0	-0.3103260212128895	0.11182768464288098
88.0	0.6446685913410205	5.0023095629679775
88.0	-6.100394792518349	6.872959971815319
88.0	5.455726201177338	-11.875269534783314
89.0	-0.9590550315728977	0.6094372111735086
89.0	0.23389231456163548	-1.128198773632574
89.0	0.7251627170112556	0.5187615624590524
90.0	-0.5667793358811535	7.14761464912589
90.0	-3.462014281615592	3.061636038611575
90.0	-3.383257613731621	-3.6362409230475725
90.0	7.412051231228387	-6.573009764689911
91.0	-2.906112918887169	5.463618467914702
91.0	0.7978334471521649	-3.222398959332693
91.0	2.1082794717350044	-2.241219508582023
92.0	-3.7191961506944926	0.17526633018456625
92.0	-2.762250813127819	-2.5367785643129785
92.0	2.4354000471380215	-5.535905593787458
92.0	2.079296857494457	3.823782774267519
92.0	1.9667500591898484	4.073635053648349
93.0	-0.8789154178397645	-6.615462228291303
93.0	-0.23933937544861067	-6.124573074658413
93.0	2.5850466967889485	4.162793695462421
93.0	-1.4667919035005592	8.577241607487297
94.0	4.632311845044756	-1.8934733656311822
94.0	1.152356526609181	4.870680217219416
94.0	-3.948802663487718	0.2968417434624781
94.0	-1.8358657081662142	-3.274048595050701
95.0	-4.098833200617854	0.07850319245364114
95.0	-4.059508881355377	-0.9991598207853262
95.0	4.715131549493063	-3.946463528124839
95.0	3.4432105324801623	4.867120156456516
96.0	-2.906731442521999	1.7067809819546809
96.0	-2.442808794524569	-4.577635340106174
96.0	5.349540237046567	2.8708543581514796
97.0	5.832907451108349	15.374382893866406
97.0	-13.090387038353306	-13.444348575724092
97.0	0.8670219388307708	-16.434656186676005
97.0	6.390457648414174	14.504621868533675
98.0	-1.3474760729051891	-0.5461551397300998
98.0	-0.297393487209581	-1.1642544645706998
98.0	1.6448695601147643	1.7104096043007952
99.0	2.6132357008937657	-2.265048706416287
99.0	2.7132683822459787	8.563814204372122
99.0	-3.740048041733521	1.6374298835144618
99.0	-1.5864560414062019	-7.936195381470289
100.0	4.030458731535461	6.268666250983146
100.0	-17.905234842705617	2.6889965928175257
100.0	-8.187919432710155	-11.353378408608243
100.0	6.985922609204293	-3.7382835519295563
100.0	15.07677293467601	6.133999116737162
101.0	-4.7909027018907	7.304269247291294
101.0	-4.8517627849002025	6.356106301045677
101.0	5.704421996688606	-10.910292919322155
101.0	7.512652957989107	-10.068869471051112
101.0	-3.5744094678868077	7.318786842036297
102.0	-8.128060733598168	-2.1028522302878425
102.0	-4.597117172179019	-8.492645325817255
102.0	14.68487939311396	-1.718508771343644
102.0	5.328175642102773	7.620765932595147
102.0	-7.28787712943958	4.693240394853599
103.0	-1.2089129213669598	0.4595849485123572
103.0	0.771377415641339	-0.6012649633310796
103.0	0.4375355057256339	0.14168001481871687
104.0	13.914051709949089	-1.8415573572302137
104.0	-5.921302559551789	6.38850434317797
104.0	-7.992749150397287	-4.546946985947775
105.0	-1.9275762765607711	0.3744381680252629
105.0	0.7368226442827246	-3.1986402719003526
105.0	2.1773763063194105	1.4587008016102718
105.0	-0.9866226740413518	1.365501302264811
106.0	2.5976460722903725	1.673818876728195
106.0	1.2935699519037085	3.7426350627500833
106.0	-3.1833753511693783	-2.39855860975169
106.0	-0.7078406730246869	-3.017895329726589
107.0	-4.517363676720863	1.6540014825687983
107.0	-4.141694725227816	-0.29504184048620713
107.0	1.7160201060922466	-2.808005722260133
107.0	4.133038658844602	-1.9546876860144502
107.0	5.210816964427213	-0.8127811939567655
107.0	-2.4008173274153646	4.216514960148745
108.0	-2.4932181364042822	7.550566507729873
108.0	-0.015382405885116609	-3.149932972621691
108.0	2.5086005422893933	-4.400633535108202
109.0	-5.048756090837453	-1.7097042265213593
109.0	-4.346824491847824	-3.5217129658490665
109.0	4.962046430230354	1.5175976236207382
109.0	4.433534152454919	3.7138195687496918
110.0	11.822586260691464	6.875976772663642
110.0	-9.37672505994181	-2.739013908937688
110.0	-2.445861200749647	-4.136962863725955
111.0	5.91797360601034	0.23980306142986796
111.0	-4.261176220755604	2.8383587705231856
111.0	-1.6567973852547493	-3.078161831953059
112.0	-5.5911108805023275	4.870855960723303
112.0	-0.034477011199545694	-2.6461606001289617
112.0	5.625587891701878	-2.2246953605943465
113.0	-1.5419465398692387	1.2093583541357737
113.0	-0.21605999861678343	-0.40653322191679153
113.0	0.648865588686584	-0.6992343005650841
113.0	1.1091409497994342	-0.10359083165390394
114.0	-4.272808249177999	-2.0338070839840006
114.0	-3.9098174371919083	-3.697104524205128
114.0	2.4031653620686546	-3.9019166533379384
114.0	5.779460324301274	9.632828261527068
115.0	7.906904713936451	6.549311632665214
115.0	3.778441185885102	15.453513127709764
115.0	-10.828749623017305	-9.103548795629415
115.0	-0.8565962768042255	-12.899275964745536
116.0	0.3485841475954121	-1.143984314035996
116.0	1.490276656381495	0.7940639616273203
116.0	1.1174774977681543	1.0314947112138453
116.0	-2.9563383017450677	-0.6815743588051778
117.0	2.488513981612393	0.7897118965486734
117.0	-3.1450747767234164	0.37922720477908184
117.0	0.6565607951110338	-1.1689391013277648
118.0	-2.1314974480846036	-10.999428780422873
118.0	4.530669568190115	4.5718887465519025
118.0	-2.399172120105529	6.427540033870983
119.0	-3.450576669528291	3.259894363345439
119.0	-1.9850106415868283	-5.481316527599725
119.0	5.4262420382683345	-3.4785289594156543
119.0	0.009345272846764415	5.699951123669933
120.0	0.582482717157835	2.256195888118577
120.0	-3.364587489869639	-1.6654627440627916
120.0	-1.6032294992284388	-2.8659465135482596
120.0	2.5355024701414237	0.35246214161444056
120.0	1.849831801798813	1.922751227878022
121.0	1.2054104949703566	3.4450757214445766
121.0	-2.123539916221973	2.671637511012269
121.0	-2.42876183358225	-3.889722455906055
121.0	3.3468912548338663	-2.2269907765507835
122.0	-0.655344809945792	-0.14692137787254686
122.0	0.06512452524472016	-1.1098918485210842
122.0	0.590220284701068	1.2568132263936158
123.0	-1.68098483860283	-8.940616458056832
123.0	10.427619875693182	-4.7018541030118
123.0	-0.20512714592143372	10.198711493166218
123.0	-8.541507891168926	3.443759067902424
124.0	6.565380673995557	7.799991366094666
124.0	-3.981341570735414	7.471413261579053
124.0	-5.228112965625324	-5.145981193116583
124.0	2.6440738623651807	-10.125423434557131
125.0	2.3696249016863233	2.3524214148068157
125.0	-0.9957829615137879	2.9602723917450477
125.0	-1.3738419401725452	-5.3126938065518825
126.0	-0.9923682667383474	-0.017187722413147453
126.0	0.7225446972005098	-0.7664855467100131
126.0	0.26982356953782355	0.7836732691231534
127.0	-0.9893824752337562	-4.622569623463524
127.0	1.880179289824453	-0.537973239243441
127.0	0.15002931556100643	2.485604097932046
127.0	-1.0408261301517052	2.674938764774916
128.0	-0.3124030882913436	0.4527968193073145
128.0	0.19135796467283267	-0.5955915549180084
128.0	0.12104512361851094	0.14279473561069386
129.0	0.5982257359420914	-4.7190600066251855
129.0	2.0377802825050244	4.616361658791436
129.0	-1.3605206489840933	2.7836681779730013
129.0	-1.2754853694629935	-2.680969830139255
130.0	2.67658848635483	1.1010930286591263
130.0	-3.908521158246756	1.6246896343185058
130.0	1.2319326718919328	-2.725782662977619
131.0	0.4724900854751143	0.00875375662457029
131.0	-0.5422178384480377	0.3566275583385738
131.0	0.06972775297292867	-0.36538131496313925
132.0	0.9246682993603644	0.4928971385576018
132.0	0.5996129246462527	2.1790187815552002
132.0	-2.130999434878073	-0.6764821770919001
132.0	0.6067182108714699	-1.9954337430209022
133.0	1.1276736120968818	0.9311748641092138
133.0	-2.273812795116677	2.8952748172681253
133.0	-0.43564059157436946	-3.1509761109971675
133.0	1.5817797745941595	-0.6754735703801628
134.0	0.11576671300404927	-3.516277604190009
134.0	2.723533314010949	3.443472019941599
134.0	-1.4441227870345563	3.069240957789973
134.0	-1.3951772399804552	-2.996435373541558
135.0	0.4906833087163803	-0.057996234441157556
135.0	0.6493890611984234	0.8262178476333191
135.0	-0.4865207450391244	0.866740462200661
135.0	-0.6535516248756924	-1.6349620753928173
136.0	-0.30650615453622926	3.207482962788096
136.0	-1.6399886302864422	-2.020144749817004
136.0	1.9464947848226655	-1.187338212971084
137.0	-1.4382871625207188	1.9565903781846516
137.0	0.7140393643578814	-3.781278007461374
137.0	0.7242477981628397	1.824687629276729
138.0	5.418905935510184	-3.567852125922073
138.0	2.3909724982367573	3.573898374632897
138.0	-7.80987843374694	-0.0060462487108251806
139.0	0.0076305196301097045	0.007190605118126657
139.0	-0.006501960594810671	0.0010988309027307782
139.0	-0.001128559035320115	-0.008289436020860588
140.0	-2.720857701487662	2.128865695953466
140.0	1.5954453108547846	-4.365660407851202
140.0	1.1254123906328766	2.2367947118977427
