# Supplementary material
Source: ML conference proceedings conference paper supplement (https://openaccess.thecvf.com/content/CVPR2021/html/Harel_Crossing_Cuts_Polygonal_CVPR_2021_paper.html)
Supplement: Supplementary file 2 [file Harel_Crossing_Cuts_Polygonal_CVPR_2021_supplemental.zip › Dataset/D3/p3/pieces.csv]

piece	x	y
0.0	-3.4352417199366023	-2.7246429659421314
0.0	-3.1231924477315482	-2.9055185006599906
0.0	3.564672449090574	1.6210294747304197
0.0	2.993761718577564	4.009131991871708
1.0	1.9491772076652996	3.8983898904428607
1.0	-4.640987495639867	4.4188436398724535
1.0	-5.313249085336945	3.249237849663136
1.0	2.3009997358176753	-13.212989354041623
1.0	5.7040596374938435	1.6465179740631823
2.0	5.117931656690795	-10.563080447779639
2.0	6.399854432836116	-8.941815663689908
2.0	8.307397289159747	-0.10310440167427048
2.0	5.746794738460444	19.176599175769656
2.0	-6.647214665866156	13.296641193150071
2.0	-7.378457275500262	-0.09981083255179624
2.0	-6.84666563877466	-3.4076641593954413
2.0	-4.6996405370060135	-9.357764863828665
3.0	0.9454527491111936	-2.266817690620244
3.0	5.1010292583575705	0.5703390008157488
3.0	0.7641977207980968	5.5615071840577555
3.0	-6.810679728266866	-3.865028494253269
4.0	-4.005802383673038	-0.6023105615396173
4.0	-1.2390702946210415	-7.598197170421458
4.0	0.14549796042756835	-7.556598484577461
4.0	2.980252725690663	7.837351735775049
4.0	2.1191219921758835	7.919754480763485
5.0	-15.384267013143088	3.3021577827931017
5.0	-12.608629980604409	-8.329178989106069
5.0	7.759828473069036	-13.646871556120521
5.0	8.489995108517498	-12.417215640440242
5.0	11.33838230551933	-5.207785136689288
5.0	12.196516125573941	4.798511869349921
5.0	7.4404381960528445	8.102333553202012
5.0	-9.195675892054307	11.743763002617134
5.0	-10.036587322930846	11.654285114393891
6.0	-7.128962542508634	3.2875750295465265
6.0	-9.41273234450436	-3.1390421935859774
6.0	-3.7815402063603174	-20.4139732786943
6.0	12.111603311791601	1.4291687513629598
6.0	8.635302595422202	9.313965571416626
6.0	-0.42367081384051275	9.52230611995417
7.0	-2.5763393230557194	8.570703198795782
7.0	-3.343434446816572	8.808365085289855
7.0	-4.9779514702874845	-4.450648610601952
7.0	3.7865439384619104	-7.722802300992699
7.0	7.111181301697868	-5.205617372490986
8.0	1.383769438951268	-2.549706353922153
8.0	3.800012632522884	-0.9106817491460603
8.0	-5.183782071474159	3.460388103068214
9.0	-0.39767417800882354	-1.5465021383077138
9.0	1.8633482220899782	0.37557932428731494
9.0	-1.4656740440811646	1.1709228140204255
10.0	0.002238722490779095	-0.31584634579326565
10.0	0.5691717781033684	0.2591804134402136
10.0	-0.5714105005941474	0.05666593235305218
11.0	4.272238616979882	-2.6895573416709055
11.0	-3.1555307193960065	4.249999373838558
11.0	-4.236463350325703	3.836509702052141
11.0	-0.8023434582185333	-0.8653281749932806
11.0	3.922098910960377	-4.531623559226514
12.0	-7.779973707513668	-0.03427249152751594
12.0	7.547974982605491	-3.9385515479286566
12.0	7.648628693329813	-3.4434799866123416
12.0	-2.3574854273874766	3.70019789553061
12.0	-5.05914454103414	3.716106130537901
13.0	-1.8153718847005154	-6.526904011585456
13.0	0.09488747535342666	-6.807913772068148
13.0	4.551300798134648	2.5910933684613213
13.0	-0.8008706307776677	6.269637312548386
13.0	-2.0299457580099123	4.474087102643893
14.0	-2.431056130220055	6.617893200055995
14.0	-7.271762307215279	9.135953163259265
14.0	-16.15082162452627	3.683733906709658
14.0	7.639899190541227	-9.022496014147306
14.0	8.91745786404418	-8.427031020336553
14.0	9.296283007376216	-1.9880532355410783
15.0	0.3516266611892033	7.667285279478342
15.0	-3.493729591599626	-7.934154943803691
15.0	-2.3568154059154534	-9.3010997859007
15.0	5.498918336325849	9.567969450226041
16.0	15.403060901836389	7.309531774234135
16.0	17.68976306317565	12.389961280044801
16.0	-13.004970380582444	-0.5124579680612711
16.0	-15.159239578627444	-5.771138231808975
16.0	-4.928614005802185	-13.415896854408741
17.0	-6.125118446332328	8.111181329880056
17.0	-7.874559777309894	-7.6158451465670725
17.0	-7.341473351364364	-7.953101572650155
17.0	10.6580348323915	0.01144257705853145
17.0	10.683116742615136	7.446322812278683
18.0	-0.046497129525533275	1.4872929751893886
18.0	-1.6779666068770258	0.2390559286503231
18.0	-0.4076875137126512	-0.4033809197550098
18.0	2.1321512501152355	-1.3229679840846869
19.0	-1.7516347639401548	-1.2784481316788316
19.0	0.4032744938256388	-1.5789944553799335
19.0	2.1733188974831132	0.7527851684096991
19.0	-0.8249586273685914	2.1046574186490745
20.0	-4.58328735837485	1.200061781536613
20.0	2.0717864869931337	-1.387512104940356
20.0	2.25088295801537	-1.364056419533268
20.0	3.0535976574146004	0.29629354568164834
20.0	-2.7929797440482305	1.2552131972553546
21.0	1.8733154175026239	-3.224439686523271
21.0	1.0318308151029172	0.9617061457539116
21.0	-0.0660843407681182	2.3759101520068944
21.0	-2.839061891837421	-0.11317661123752079
22.0	1.4944777444897386	-22.14422568634378
22.0	5.189971830910495	-14.961604133668516
22.0	8.849366553913256	14.23680960818025
22.0	-15.533816129313445	22.86902021183205
23.0	5.851690124705995	-2.7893925970393325
23.0	5.873993943492064	-2.4525577000892067
23.0	4.652320074701276	0.5092774567815915
23.0	3.8706708299936032	1.8898039546434997
23.0	-13.098923953975339	3.348331286008772
23.0	-7.149751018917585	-0.505462400305323
24.0	-1.1630129355936536	3.587834773601361
24.0	-0.14291164719824118	-6.4616726885312845
24.0	1.2234637944590139	-4.398979802293514
24.0	1.0948587431552863	2.9820378132151
24.0	-1.012397954822406	4.29077990400834
25.0	3.471254726681041	-2.0787017936132175
25.0	-1.2643094106801118	1.3929778970756408
25.0	-2.206945316000948	0.6857238965375587
26.0	-1.0038892452658539	-4.080391742992599
26.0	1.6455462479146574	1.7628573919278012
26.0	-0.6416570026488039	2.317534351064798
27.0	-2.217402861861794	2.2793962516288437
27.0	-0.08129239310425632	-2.1761984437862147
27.0	0.6898026012714918	-2.3080134207144543
27.0	1.608892653694562	2.204815612871819
28.0	3.709242040842428	0.9171519782231626
28.0	5.61516484573642	2.6424563394409044
28.0	-4.918105188784018	-0.6482885230194516
28.0	-4.406301697794825	-2.91131979464461
29.0	-0.15921631038578607	0.10443915250262349
29.0	-0.11187302260094024	-0.27231645598591137
29.0	0.21726653938203103	-0.4672510123114704
29.0	0.05382279360468163	0.6351283157947621
30.0	-1.968601281811135	8.503250354828943
30.0	-4.07803737464726	-6.463577511288078
30.0	-0.6342152441455119	-7.915674590946111
30.0	6.680853900603911	5.876001747405255
31.0	4.859987240446455	7.498551543670202
31.0	-5.893455939921345	-5.631462839771527
31.0	1.03346869947489	-1.8670887038986734
32.0	10.620119603310187	-7.975024869072371
32.0	-1.6873859285453927	5.779326853071978
32.0	-3.0239901651723566	5.512828284425966
32.0	-5.908743509592442	-3.3171302684256014
33.0	13.358177360662355	-9.91500066377005
33.0	-4.858381951097921	20.785853400019345
33.0	-6.040046892799921	20.13136290677437
33.0	-9.333387469496001	-13.304950563247212
33.0	6.873638952731501	-17.697265079776468
34.0	-1.7364550308544588	-6.345798420058792
34.0	3.6532247691211825	8.934814538677664
34.0	3.557092338877384	9.070650287588155
34.0	-3.1565381439520355	-5.267775093995527
34.0	-2.3173239331920263	-6.391891312211535
35.0	-5.990621850643561	-1.430624374511364
35.0	9.778621133961684	-3.630937441436769
35.0	9.251318198605937	2.3326059024371086
35.0	-6.446844322638448	3.1311277835497684
35.0	-6.592473159285613	-0.4021718700387298
36.0	0.5110029712063171	-0.5085648231899365
36.0	-0.8614019143075845	1.0523683830718529
36.0	0.3503989431012875	-0.5438035598819146
37.0	-0.3110498107509888	-1.5714929340722514
37.0	-0.15732382650954005	-1.6529514378373915
37.0	0.9865304293901861	0.9714404534680375
37.0	-0.5181567921296455	2.2530039184415944
38.0	-11.022134945955617	-12.045892424808814
38.0	-5.809299703770897	-15.881550668104516
38.0	9.244405804001433	14.098678304647578
38.0	7.587028845725079	13.82876478826575
39.0	-3.90111907175455	0.4827914391470092
39.0	-2.6932202974652317	-3.0976629235869093
39.0	3.638240000822462	-2.287881904918152
39.0	4.772755307185496	-1.6224956450107089
39.0	0.5585197277960005	4.481307668670383
39.0	-2.3751756665841706	2.043941365698409
40.0	6.168461330628482	16.1060364970576
40.0	-6.375498994760263	-6.665613598954657
40.0	0.20703766413178276	-9.44042289810296
41.0	6.925278201405725	2.209250864180798
41.0	1.295855147886434	5.797337760466042
41.0	-4.63737244341763	-1.0433239860941188
41.0	-3.1417697193795737	-2.9866449858626924
41.0	-0.44199118649495495	-3.9766196526900295
42.0	-1.9718486146563226	0.29794965355103226
42.0	-3.902392856973064	-1.4603434130622412
42.0	2.615906971937165	0.139349355283973
42.0	3.2583344996922237	1.0230444042272067
43.0	-8.07927341039921	-1.7365523080060863
43.0	-3.918198983145069	-8.590433328679136
43.0	5.4478714105820725	3.8435302887447387
43.0	6.549600982962213	6.483455347940478
44.0	-2.9929646834146566	-2.0929958299811386
44.0	1.3148018871502496	-0.6423670728458216
44.0	1.6781627962643935	2.7353629028269646
45.0	5.628835435156351	5.734501967524566
45.0	-15.323299717862877	1.4879254842182768
45.0	1.2468435811721539	-4.866747993576397
45.0	8.447620701534367	-2.355679458166433
46.0	-1.318742556887263	2.739095662384652
46.0	-1.0652283174259523	-0.7584079878059891
46.0	3.0511888389525845	-4.571045109480289
46.0	-0.6672179646393271	2.5903574349016734
47.0	3.580578166775869	7.584687617339526
47.0	3.1636558131674724	8.094135408028315
47.0	1.7857292832348632	7.930906133499827
47.0	-6.389667895593439	-12.004186081593975
47.0	-2.1402953675847645	-11.605543077273733
48.0	-3.2005193323900376	1.3765897313134172
48.0	0.47529661694679587	-3.6568614725204913
48.0	2.72522271544324	2.280271741207082
49.0	-6.239383778374234	0.4420077803209023
49.0	3.453763896366304	-9.868752141484574
49.0	9.256249476501694	-5.2523224458392335
49.0	0.7328028408205767	8.084534137547902
49.0	-7.203432435314342	6.594532669455006
50.0	-6.556927944591883	5.339113164617266
50.0	-2.7652829273606847	-11.979827433079247
50.0	9.322210871952555	6.640714268461978
51.0	-2.4791926713648413	-0.5030563678900084
51.0	4.020995952362869	-0.5469538900573265
51.0	-1.5418032809980275	1.050010257947335
52.0	5.765834500736658	-0.9286987964394443
52.0	2.9706520140387735	2.696670787803656
52.0	-4.991041863432009	0.4675512123417534
52.0	-3.7454446513433974	-2.23552320370595
53.0	-8.194205909136775	-3.8867035890059833
53.0	0.4134222140774278	-9.583875861160301
53.0	4.541831515759392	5.158269750918629
53.0	3.2389521792999654	8.312309699247646
54.0	-2.8529808351072323	3.869176469339336
54.0	-2.748888396757443	-2.79069169052922
54.0	1.4194052508773167	-4.005852906058668
54.0	4.1824639809873645	2.9273681272485557
55.0	-0.734661236481691	-1.4975897397389553
55.0	0.934289394285813	-2.5035438688283733
55.0	1.6931916023462537	0.3347500160554355
55.0	-1.8928197601504049	3.666383592511889
56.0	-4.79287801798623	6.722549773218256
56.0	-6.188289027097173	5.092365962643398
56.0	-5.201967817645167	0.6725464649230262
56.0	1.1043546751476574	-3.0596846111944425
56.0	7.500742807318946	-4.74940275897984
56.0	7.5780373802620025	-4.678374830610402
57.0	1.9772378805154784	6.451298042896627
57.0	-0.8635756022133989	6.169192696202834
57.0	-0.8591737313049315	-7.018740515197675
57.0	-0.2544885469971445	-5.601750223901771
58.0	8.143616305311221	11.43653315737855
58.0	-8.17516390244071	-5.240770260547866
58.0	0.03154759712948788	-6.195762896830677
59.0	-0.600762290099238	0.7614514642105649
59.0	-0.9623846151751814	-0.5207791375860729
59.0	1.5631469052744238	-0.24067232662448296
60.0	-0.5181887283145702	-0.9470871723093172
60.0	0.008834093255708227	-2.2191067817128367
60.0	2.288439028891332	-0.984132677732318
60.0	-1.779084393832446	4.1503266317544565
61.0	0.11956822008274162	16.565532699245804
61.0	-7.490823297956061	-8.392862658230346
61.0	-7.528445194639788	-12.71420963872938
61.0	2.3904453985507406	-9.653038908633105
61.0	12.509254873962384	14.194578506346973
62.0	2.1228004922016033	-0.5035955124092796
62.0	0.45807885549532645	3.0097108270209842
62.0	0.36031706193968904	3.0687706386969724
62.0	-3.5135789500795016	-2.146172022995965
62.0	0.5723825404428765	-3.42871393031272
63.0	-8.90248952046053	6.012548872721486
63.0	-5.85678563923747	-7.08862565920009
63.0	8.064671929270451	-6.294190346877503
63.0	6.694603230427559	7.370267133356131
64.0	-1.1905316404520665	-3.179012201621397
64.0	3.573184586592288	2.3794832458620307
64.0	-2.38265294614022	0.799528955759368
65.0	-5.695571913010514	-9.010530484474907
65.0	5.5684894476348	5.456770284920112
65.0	5.957881648675861	7.995080985206073
65.0	-5.830799183300166	-4.441320785651303
66.0	0.27303003674877413	0.7263421109356119
66.0	-0.7896410862638347	-0.21437733626657826
66.0	0.5166110495150619	-0.5119647746690178
67.0	-3.209533114306968	1.6857078832511252
67.0	1.2537055645764077	-2.7413883360998037
67.0	1.4083435703700058	-2.7113140407275416
67.0	3.2726576797274647	-0.2846261046322623
67.0	-2.725173700366896	4.051620598208496
68.0	-1.5890339648645027	-4.232919773025203
68.0	4.826110244064291	-0.3235800203780166
68.0	1.3643996376055938	3.5540206338433724
68.0	-4.60147591680537	1.002479159559857
69.0	-8.70454354071205	-5.858957642467731
69.0	13.021069717380714	-1.341605719131632
69.0	14.869135788631025	1.5127643921502005
69.0	-4.1751358285308555	6.169098020145316
69.0	-15.0105261367688	-0.48129905069615664
70.0	3.5681988052827522	3.66515153539673
70.0	-3.9374684909394455	-1.454093614742116
70.0	0.369269685656714	-2.2110579206546186
71.0	13.073004265784656	-0.6614163494897933
71.0	15.192365368508769	1.8992111105933784
71.0	7.403084241021713	8.330020589027209
71.0	2.6323923627273684	6.94553163390855
71.0	-19.647136066451676	-7.04738407785601
71.0	-18.653710171590777	-9.465962906183266
72.0	-1.699338743068181	-4.518518485070643
72.0	2.4837985037406414	-6.489227709868266
72.0	-0.7844597606724579	11.007746194938901
73.0	6.914151625988082	8.711545953308363
73.0	3.339018578006105	14.876816471446759
73.0	1.7635324806806254	15.858522340225605
73.0	-8.408315866511547	3.5943406817218375
73.0	-3.2630245812438265	-19.24538624657036
73.0	-0.34536223691944845	-23.795839200132182
74.0	-2.9004770500533565	-3.741630461734544
74.0	4.582617437621515	-0.2080437038380482
74.0	3.116458445939821	1.1880943875847558
74.0	0.08541443571213374	3.5886888044300003
74.0	-4.884013269220108	-0.8271090264421419
75.0	-10.415757206201132	-10.261671866192877
75.0	17.70975841664363	-0.29705871925751776
75.0	-7.294001210442511	10.558730585450387
76.0	0.6047156489750084	0.6526626827006448
76.0	-0.5020560388471549	-0.21685347718514567
76.0	-0.10265961012784548	-0.435809205515493
77.0	-0.23569257097055596	-2.90567828282644
77.0	3.3513095687473804	-0.7798563125567027
77.0	-0.6559547036662096	2.5799063652788656
77.0	-2.4596622941106276	1.1056282301042588
78.0	-3.366721259874768	-0.3482021242553858
78.0	3.887639454497014	-1.1404600062187178
78.0	-0.5209181946222409	1.4886621304740841
79.0	2.4027562990420424	-1.0619647216246153
79.0	1.0518177002477116	2.912987711645057
79.0	0.0038784979099637045	2.6078373212443626
79.0	-2.487822580737952	-0.7761183590773919
79.0	-0.9706299164617816	-3.682741952187412
80.0	1.904239426017209	-2.8774393024526925
80.0	-0.5179321301540443	1.4773530291314891
80.0	-1.3863072958631613	1.4000862733212025
81.0	3.387000435796485	-9.406385798426815
81.0	3.883871648434169	-2.672614533033334
81.0	-1.7105265155327354	9.526955011503992
81.0	-5.560345568697878	2.552045319956145
82.0	-6.974207592903027	-3.6325586565466503
82.0	6.765078950741468	-6.291274724063099
82.0	7.523515930308721	6.431659254580189
82.0	-7.31438728814716	3.492174126029535
83.0	-1.6095845379138756	-4.189858497447715
83.0	6.871371104467779	2.8746289527608546
83.0	1.03406067801421	4.361788403549777
83.0	-6.295847244568123	-3.0465588588628822
84.0	3.7573500678091483	-2.2267780380946385
84.0	-1.995567855029095	2.2076157898635644
84.0	-1.761782212780062	0.01916224823106889
85.0	-2.9867711325057935	1.0141032276489768
85.0	-1.8274050000316653	-0.8502750718181588
85.0	1.7960877380940197	-1.5839441436080466
85.0	3.0180883944434322	1.4201159877772274
86.0	0.9157037027431516	-1.976524398407966
86.0	-0.22240396840884175	1.6849668732787029
86.0	-1.1918397066105704	2.140310601266224
86.0	0.49853997227624675	-1.8487530761369462
87.0	0.05606667673041434	-0.048359695519826815
87.0	-0.03532191091167362	0.09838803281648527
87.0	-0.020744765818764402	-0.050028337296622295
88.0	0.06195522066224328	-1.9453690771486156
88.0	1.768573888032465	-2.191272648957598
88.0	-0.487007756916944	2.0509100842661674
88.0	-1.3435213517777544	2.0857316418400567
89.0	5.611891619593209	-1.6770634179776205
89.0	-1.0325558811886766	5.542825009552489
89.0	-4.579335738404538	-3.86576159157486
90.0	-1.912480537089616	-1.477899258740787
90.0	1.9476752388919152	1.056763851154171
90.0	1.9080324016383892	1.7332974516521966
90.0	-1.943227103440683	-1.3121620440655957
91.0	0.3916557826940139	-0.1832012969612652
91.0	-0.734550271798797	0.5313607893354796
91.0	0.3428944891047833	-0.348159492374218
92.0	2.0801696438692368	-3.7558118744224696
92.0	3.260762316784334	-1.456805677903181
92.0	-2.557926000994452	2.6427109992007436
92.0	-2.783005959659117	2.569906553124914
93.0	1.186908803902939	-0.9620503175571784
93.0	0.0537614378344207	0.8672940242941405
93.0	-1.2406702417373614	0.09475629326304563
94.0	-2.6895169562307704	-3.729177559463623
94.0	2.333731941250924	-8.023745741507929
94.0	7.845646720987393	-3.426178461363888
94.0	-0.2430510533419784	8.841813065908747
94.0	-7.246810652665541	6.337288696426686
95.0	0.31907605201408323	0.5098079717221944
95.0	-0.9052688205554871	-0.03161811493193883
95.0	-1.0296189519372945	-0.662639459088443
95.0	1.6158117204787021	0.18444960229818141
96.0	0.6195893922407643	-5.273438625390492
96.0	2.2411981196302215	-3.5315303576450447
96.0	-2.8607875118709982	8.804968983035536
97.0	0.7775407307120893	0.9617549345985663
97.0	0.5445954527331734	1.1998273901380698
97.0	-1.3221361834452627	-2.161582324736636
98.0	1.6739544067511214	-6.354141156130995
98.0	-1.0599244958748666	7.468379033190893
98.0	-2.0056038834303744	5.248246513508748
98.0	1.3915739725541325	-6.362484390568642
99.0	-1.1383096148387204	0.47401706775369556
99.0	0.4855864936527686	-2.124853738136235
99.0	0.6527231211859452	1.6508366703825423
100.0	0.8424623104406571	-2.1833231888757583
100.0	1.7113597765972874	-0.24053144832901405
100.0	-2.553822087037933	2.423854637204778
101.0	0.5610277613799719	20.243181738969316
101.0	-6.5592943689258325	4.037730114295976
101.0	-3.900386076547382	-12.94996822043578
101.0	9.89865268409323	-11.33094363282952
102.0	-9.337046094352765	4.326990407187418
102.0	1.6573425094544423	-7.026970871201441
102.0	1.7850895911341447	-6.948066422286234
102.0	5.89461399376416	9.64804688630023
103.0	-0.13341586911915013	0.14686170695713444
103.0	0.013650091543959247	-0.11356143374568815
103.0	0.11976577757519517	-0.03330027321145195
104.0	-0.4754207918641456	-0.046494463545179845
104.0	1.222545504868226	-2.3843598490236064
104.0	-0.3027166110333978	1.295863566564192
104.0	-0.4444081019706876	1.1349907460045894
105.0	-1.4897293555536328	-0.2923439440314046
105.0	-1.3885592136771823	-1.4258213528377177
105.0	2.1263203988391237	0.8041020353002762
105.0	0.7519681703917015	0.9140632615688454
106.0	-2.783398976171484	4.07466878778661
106.0	-3.5849291857908434	2.8562951109224812
106.0	-4.785324578559481	-3.4311173667611183
106.0	2.2216036699222337	-6.205129477800615
106.0	4.578638313302473	-0.7542377998701658
106.0	4.353410757297139	3.4595207457227737
107.0	2.056434674081072	3.9053343813500137
107.0	-11.007072630071644	6.7398293326688075
107.0	2.762556047366801	-5.28384045422726
107.0	6.188081908623757	-5.3613232597915665
108.0	4.218155976740744	2.8516400070232018
108.0	-2.9062529769369236	2.4265343294751096
108.0	-1.3119029998038183	-5.278174336498326
109.0	0.13352167808882728	0.42686805620278623
109.0	0.029348932448876316	0.5148781992962088
109.0	-0.16287061053770815	-0.9417462554989755
110.0	-0.9608078355001909	3.5285511207935945
110.0	-1.0256201544300236	3.5181588553039154
110.0	-0.8658514655150416	-2.538942463012757
110.0	0.2776119375146845	-3.116783120400423
110.0	2.574667517930565	-1.3909843926843057
111.0	7.373862603146492	1.9193744787960219
111.0	8.74962606742476	6.307140670599506
111.0	-8.683529191862739	-2.65497195486006
111.0	-8.586242994364966	-3.4663645311091953
111.0	1.1462835156564237	-2.105178663426276
112.0	-5.794606994387536	8.390840218663964
112.0	-7.125672143684708	-6.244114767549108
112.0	5.484738646814289	-6.0221097583602905
112.0	7.435540491257958	3.8753843072454206
113.0	4.890194217296967	5.466624931830166
113.0	-9.064760463188007	-2.2642022202728302
113.0	-5.0061755750437	-3.9524923382347463
113.0	9.180741820934745	0.7500696266774252
114.0	0.007987449559756204	-0.056282555987667585
114.0	0.019407123225121194	0.03573259550622691
114.0	-0.027394572784851867	0.02054996048144277
115.0	-5.826475039845409	-1.9758327141926977
115.0	4.098685789717613	-4.0054980270303435
115.0	3.048026755485007	0.46210593889828444
115.0	-1.3202375053572133	5.519224802324758
116.0	0.11882451566523802	-12.405671700711617
116.0	20.73782748133626	-6.285631474746257
116.0	7.183410170315715	6.2994379585708895
116.0	-13.829238648897132	10.114623587199034
116.0	-14.210823518420069	2.277241629688005
117.0	-2.9626613995286375	8.782996232894563
117.0	-4.295255992553282	3.9143649548717026
117.0	-5.721478641660922	-9.372537747972494
117.0	12.979396033742827	-3.324823439793788
118.0	-0.9027705379552836	2.8708717331186846
118.0	-0.4399416882331127	-3.1585212377939085
118.0	0.6278208339999033	-3.589988652853324
118.0	0.7148913921884847	3.877638157528553
119.0	1.1765775689535993	-1.2656777924329208
119.0	1.5056563825813707	0.6054704574595112
119.0	-2.682233951534977	0.6602073349734084
120.0	13.490574692748503	0.31988537403737555
120.0	13.895095024640568	1.8462698359127245
120.0	-16.89055550242698	10.088558475159656
120.0	-7.248927746271022	-6.3358979759568275
120.0	-3.246186468691064	-5.918815709152929
121.0	3.2057690488493087	-2.8639326760270967
121.0	-0.4099835729898178	0.9511798345445462
121.0	-2.795785475859463	1.9127528414825452
122.0	-1.2970033937630343	-1.6628207826339676
122.0	1.0004413116110906	-2.1494784292664155
122.0	1.5937299162271668	2.1346702209950883
122.0	-1.2971678340752288	1.6776289909052908
123.0	0.4654144738179909	-1.857226587457612
123.0	-0.16256465669870945	1.1547828284892474
123.0	-0.3028498171192805	0.7024437589683715
124.0	2.238106980198603	-19.061418913726463
124.0	3.891429453721003	9.921028452086231
124.0	-6.12953643391961	9.140390461640237
125.0	0.22581646894360927	-0.38879240368314705
125.0	0.5221167879819333	0.31510544211287767
125.0	-0.7479332569255582	0.07368696157027158
126.0	-2.5291377461398286	2.0372682942539946
126.0	-2.9030937132003776	-4.011778718021399
126.0	5.090810186804423	-0.8877803409117735
126.0	0.34142127253578575	2.8622907646791997
127.0	4.143864165607223	3.697548411942044
127.0	-2.9659486394710517	3.5623271292262984
127.0	-1.1779155261361736	-7.259875541168336
128.0	7.2674892872508785	0.9451369585375928
128.0	2.9660533614192244	9.121061448866177
128.0	-5.6314890371953945	-4.128631399015528
128.0	-4.602053611474701	-5.937567008388219
129.0	1.0938160083250599	-1.1592020750520153
129.0	0.1833335385791492	0.12543217452254987
129.0	-1.2771495469042202	1.0337699005294767
130.0	-2.720769427647043	0.17229937200217144
130.0	3.332840456264694	-2.303111528914504
130.0	-0.6120710286176465	2.1308121569123206
131.0	3.266383392864683	-2.8180013852585613
131.0	1.0110802522980733	0.7867551640651546
131.0	-4.277463645162751	2.031246221193415
132.0	1.1659066677005687	-0.6639274662783128
132.0	-1.6641188398164302	2.522092124872314
132.0	0.4982121721158889	-1.858164658594011
133.0	11.995350389205434	-2.0480295016204875
133.0	-3.6667726638132656	4.824804276690369
133.0	-8.509554979392838	3.8942119540540037
133.0	0.18097725400063538	-6.670986729123911
134.0	2.4885192323614866	0.07629994408866088
134.0	-1.7305727290133852	1.5152635933385636
134.0	-0.7579465033480968	-1.591563537427219
135.0	3.524544061081989	-3.5088301149114853
135.0	3.86129979180493	-0.6127761761030935
135.0	-7.385843852886919	4.121606291014565
136.0	0.5406824427195488	-14.992143975060555
136.0	1.8526776847991115	12.302058786699615
136.0	-2.7475855047291367	17.71864034915092
136.0	0.35422537721047626	-15.02855516078998
137.0	-1.0191503703822118	0.706006249023452
137.0	0.3865481197330238	-0.7464310239221611
137.0	0.6326022506491881	0.040424774898709076
138.0	2.5546478402973865	2.980966042102293
138.0	-3.020661987556971	-1.3437138293079043
138.0	0.46601414725955853	-1.6372522127943772
139.0	-3.2375974952441755	3.4130629197215483
139.0	-5.638459114134783	-7.366971145270236
139.0	8.949106833594039	-0.8122096153639928
139.0	-0.07305022421507883	4.766117840912684
140.0	0.1458245835729315	-0.12468554329503291
140.0	0.29656984851014523	0.045492889880853295
140.0	-0.4423944320830784	0.07919265341418658
141.0	-0.7345289481141092	-0.130546750566801
141.0	0.4970254172841183	-0.5795992026157568
141.0	0.23750353082997763	0.7101459531825527
142.0	-0.11300614946671247	-0.32575220185715714
142.0	0.3265142699482475	0.06328301337166448
142.0	-0.2135081204815486	0.2624691884854886
