# Supplementary material
Source: ML conference proceedings conference paper supplement (https://openaccess.thecvf.com/content/CVPR2021/html/Harel_Crossing_Cuts_Polygonal_CVPR_2021_paper.html)
Supplement: Supplementary file 2 [file Harel_Crossing_Cuts_Polygonal_CVPR_2021_supplemental.zip › Dataset/D3/p4/pieces.csv]

piece	x	y
0.0	1.376928463386794	-0.8502366576931978
0.0	3.443275924687772	2.0371802151063054
0.0	-2.2569253822510427	-0.34786791210585144
0.0	-2.563279005823518	-0.8390756453071926
1.0	2.1664355494555068	-3.4198886839269704
1.0	2.18519895762077	-3.270057334934934
1.0	1.611818349515241	1.558499855547474
1.0	-0.22204621303482966	3.4089308232504787
1.0	-2.8072898165905538	5.304821244481087
1.0	-2.9341168269661764	-3.582305904417135
2.0	0.5015591968375394	-0.021096859216071115
2.0	-0.7223841003013357	0.5247892063550764
2.0	0.22082490346381314	-0.5036923471390166
3.0	4.820228779750877	-8.035156698969487
3.0	13.303547267485778	-5.71442123879942
3.0	13.2257160048241	-5.02785887236154
3.0	9.764333117788444	5.73149652022731
3.0	-10.696668228322586	9.268542506521772
3.0	-15.648681126495815	2.4348462630324827
3.0	-14.768475815030765	1.3425515203489313
4.0	4.871543385165674	2.6998445262323783
4.0	0.021935924610863244	2.4671461333793157
4.0	-4.893479309776511	-5.166990659611705
5.0	3.8233349596775374	0.5243780401561313
5.0	3.5694405964924543	4.3844618274266525
5.0	-0.5667352629058846	7.458903899223687
5.0	-2.524544805216202	5.941077423647405
5.0	-2.3124595903983174	-5.6793099139216086
5.0	-1.1391081137415608	-6.445337608654603
5.0	-0.8499277839080257	-6.184173667877666
6.0	0.8802554627405949	0.8472408765822007
6.0	-0.8519469940420248	-0.003760313288302286
6.0	-0.02830846869857001	-0.8434805632938985
7.0	0.4949621097869764	-2.528186305669207
7.0	0.6966453600942264	0.9432158649490696
7.0	-1.191607469881203	1.5849704407201375
8.0	7.192304124542362	4.784878976502435
8.0	-9.762823407985348	4.032061329420321
8.0	-3.0182991519570543	-4.86382434334421
8.0	5.588818435400032	-3.9531159625785444
9.0	10.088381481442413	-1.3229484860509237
9.0	8.158550498502034	10.894704687277663
9.0	-15.99594552817761	3.2931478601791815
9.0	-10.921498432501004	-10.588870723004936
9.0	8.670511980734222	-2.2760333384009703
10.0	4.510083405213393	4.587910726228179
10.0	2.8215136275056483	6.290920804765895
10.0	-6.536507623847154	-3.458968808622249
10.0	-4.760594247466065	-6.081878007559186
10.0	3.9655048385941805	-1.3379847148126374
11.0	-1.0037475063491885	1.792929024450689
11.0	-2.5457419748811065	1.2632118429128885
11.0	1.4642830534367923	-1.538662637338596
11.0	2.085206427793517	-1.5174782300249972
12.0	-6.2902275319048995	-10.056832636099166
12.0	-5.802030554574105	-11.578856162322428
12.0	1.2142280587627563	-9.91898154052472
12.0	6.000271591944755	15.182369571050032
12.0	4.87775843577149	16.372300767896284
13.0	0.165161848239869	-1.6038806924471247
13.0	0.787494540569144	2.264253099850735
13.0	-0.9526563888089888	-0.6603724074035947
14.0	2.8279599930069725	-2.476263578739252
14.0	5.609664919402763	5.109941020121064
14.0	-8.43762491240972	-2.633677441381813
15.0	0.28401641037026626	2.2894104478534465
15.0	-3.430014092267657	0.047025116483205176
15.0	3.1459976818973776	-2.3364355643366466
16.0	-3.699387721904509	1.5952448740402614
16.0	2.022549185979032	-2.812283927188376
16.0	3.227371085771271	-0.7303402404640433
16.0	-1.550532549845779	1.9473792936121526
17.0	4.492023969353708	9.56569605917902
17.0	-5.94907170622981	-1.8031873498300308
17.0	-6.326839096582844	-3.1398923057162813
17.0	-2.7109891799645043	-5.014639099630015
17.0	3.722838415252588	-4.070800676206514
17.0	6.772037598170961	4.462823372203838
18.0	6.271797525380421	4.431022635390434
18.0	-0.03192441352265085	7.7593415651347835
18.0	-5.297709751414152	-0.4926717372187205
18.0	-0.942163360443637	-11.69769246330648
19.0	3.414903984819361	0.4681503334889551
19.0	3.4142786157586746	0.49983499071955234
19.0	-3.389722010828231	0.22390699263372454
19.0	-3.4394605897497783	-1.1918923168422146
20.0	6.3543796591131265	-4.503082811968064
20.0	3.4630019190195904	0.3685064405444227
20.0	-4.554952136146481	2.6513259702437972
20.0	-5.262429441986272	1.4832504011799053
21.0	4.660889958158558	0.5031308668447734
21.0	-0.015855330108428767	4.9364747232252855
21.0	-3.651244699720481	3.715128077469047
21.0	-2.2952131340320174	-3.4439091993863333
21.0	1.3014232057023323	-5.710824468152703
22.0	-4.37582083424466	-2.785395121094002
22.0	-0.5743178271655505	-7.08754159403877
22.0	4.95013866141021	9.872936715132758
23.0	-6.180279383341766	2.334163294715917
23.0	-7.112387437169123	0.48660195664859707
23.0	0.29228287118441876	-2.4569488847550978
23.0	6.283074594133694	-0.9029402754449654
23.0	6.717309355192789	0.5391239088355437
24.0	3.5145116667161984	3.785883313631751
24.0	1.3807215643155908	4.937486673467028
24.0	-2.0066316018889654	0.22124409655545324
24.0	-1.987513586615072	-4.2188493976957755
24.0	-0.9010880425277524	-4.7257646859585
25.0	-0.7980539833397848	-4.010005636182803
25.0	2.9250385219167656	6.586224362689573
25.0	-2.1269845385769997	-2.5762187265067764
26.0	-8.544864109425777	-2.2570691615428995
26.0	-5.14036861394088	-4.32252882339038
26.0	7.360756966195574	2.325828543444404
26.0	6.324475757171085	4.253769441488875
27.0	-8.181897011208022	-16.651561326444252
27.0	2.193116036458819	-11.324592031955397
27.0	4.444190013315625	2.7595346633445317
27.0	3.4116627651481717	11.447398457568843
27.0	-1.8670718037145981	13.769220237486266
28.0	7.121776956507548	-18.062980757274335
28.0	4.0341391105875894	8.868152664312305
28.0	0.5329288677594004	12.26737534312728
28.0	-11.68884493485454	-3.072547250165246
29.0	0.08040789922377224	-0.4968481108889942
29.0	0.3539216610998218	-0.5011194332428515
29.0	-0.43432956032358405	0.9979675441318332
30.0	-14.375747428600873	-0.269493064396209
30.0	-4.2652297330389555	-12.922291695116499
30.0	21.93178924286969	0.4774635084261858
30.0	-3.2908120812298485	12.714321251086517
31.0	2.853896485121261	1.7983595958263463
31.0	-5.275667695777436	-1.197054594743896
31.0	2.4217712106561784	-0.6013050010824562
32.0	0.5019300641251183	8.683883168406552
32.0	-2.091148061163416	-5.219974259426926
32.0	1.5892179970382843	-3.4639089089796324
33.0	1.150094034459776	3.5023319728840843
33.0	-1.9973428805427356	3.259484993437252
33.0	0.8472488460829598	-6.7618169663213346
34.0	-3.899117239871339	-5.679881151496549
34.0	4.782705475975874	2.473737340454193
34.0	-0.8835882361045531	3.206143811042377
35.0	-0.4955040425385351	3.851802925346462
35.0	-10.308375979583145	1.3053810109808741
35.0	-7.212268488940579	-2.649952070823284
35.0	9.05927210514671	-1.7112565937258715
35.0	8.956876405915526	-0.7959752717781263
36.0	6.321135239930116	6.5617240044357334
36.0	-10.031440776698274	-4.9322973795908185
36.0	-10.2286820152022	-6.140831105593998
36.0	13.938987551970346	4.511404480749125
37.0	3.5892519591168845	0.3877975207226132
37.0	-3.316086687352139	1.5864441928832358
37.0	-0.2731652717647427	-1.9742417136058887
38.0	3.273016423307746	1.442380571645215
38.0	-4.751362002875084	-0.2259791802367931
38.0	-2.3547431693553302	-1.662987039831081
38.0	3.8330887489226586	0.4465856484226865
39.0	-7.053067523057475	0.6439170509378469
39.0	-11.472646788691044	-7.28814885696885
39.0	13.871555583304842	-4.589429007434524
39.0	4.654158728443692	11.233660813465521
40.0	0.5730521545105719	-7.993444363539877
40.0	2.5570584732945707	-7.803740894156867
40.0	15.642847378534954	6.369713273808313
40.0	-9.2911097431942	6.261250689838522
40.0	-9.481848263145883	3.16622129404991
41.0	6.313344937785267	11.240375924693637
41.0	-14.763890809368199	-5.247302581095334
41.0	8.450545871582928	-5.993073343598306
42.0	1.5733027777270776	-0.18227544300834297
42.0	-1.2298727094295945	3.0108277614368344
42.0	-1.805864683868681	-2.5112066878371
42.0	1.4624346155711827	-0.3173456305913489
43.0	0.6206193996344143	3.032333237284176
43.0	-2.5443157109752463	-0.343887678351561
43.0	1.9236963113408396	-2.688445558932607
44.0	6.1631961413608405	3.6844950020136906
44.0	0.2092972431613176	11.042677538474345
44.0	-10.821880954688078	-1.9690394030790423
44.0	-3.80561307667011	-5.345042688711082
44.0	8.255000646836047	-7.413090448697929
45.0	12.33655758055627	2.7594777694483557
45.0	4.627826555927477	5.760450717280943
45.0	-7.887073448634646	-2.2421649774886716
45.0	-9.077310687849106	-6.277763509240657
46.0	-2.147082591097867	-0.8322560327824612
46.0	-0.22516685266542014	-2.1052775905071783
46.0	1.3217868569392728	0.410532498178917
46.0	1.0504625868240116	2.527001125110725
47.0	-4.276293737417872	-3.0273591017709336
47.0	3.2718286791684723	0.1557717452635473
47.0	3.400341950723853	2.103165071335411
47.0	-2.395876892474413	0.7684222851719265
48.0	7.381931356551926	9.246919700549387
48.0	-10.926660119827938	-0.41435094255422555
48.0	-4.1894280700937525	-5.087142907043577
48.0	7.734156833369751	-3.745425850951569
49.0	0.383963990560508	0.328849488142777
49.0	-0.7938215025597705	-0.008575245335324111
49.0	-0.4096893913056068	-0.2416680086261074
49.0	0.8195469033048725	-0.07860623418132995
50.0	2.779177420585096	0.23829682280384523
50.0	1.8060854718184984	1.7717467926079955
50.0	-6.094388170799918	2.1296003974145794
50.0	1.5091252783963103	-4.139644012826438
51.0	-1.951059378425077	-1.2258299167868565
51.0	2.1923459301350285	-0.4071217836522228
51.0	-0.24128655170993793	1.6329517004390812
52.0	10.750552510357188	9.793162978914477
52.0	-2.0811927005022897	11.649766362206401
52.0	-10.301196917025516	-13.724039425183244
52.0	1.6318371071706133	-7.718889915937641
53.0	-1.891829355243333	-0.02230267170303457
53.0	1.7283702244790047	-1.1713696099384823
53.0	0.16345913076432678	1.1936722816415164
54.0	12.970979353869796	1.6330286751963974
54.0	11.695628730077454	10.471378493381982
54.0	-8.503164925491694	1.082290214227974
54.0	-8.904955640206458	-6.741413507513139
54.0	-7.258487518249119	-6.445283875293219
55.0	1.4150021805921031	4.738056206433358
55.0	-4.939331204701036	-0.8779043746757484
55.0	1.6177951308627823	-1.9496894337467103
55.0	1.906533893246144	-1.9104623980108955
56.0	0.5234113664911693	0.893151654523122
56.0	-0.8510526665595202	-0.3259846713926042
56.0	0.32764130006832876	-0.5671669831305357
57.0	0.03785442755975673	-0.004562689921656128
57.0	-0.07347423542177009	0.03298901720763999
57.0	0.03561980786201942	-0.028426327285971012
58.0	-10.108048439920656	-7.064262206387353
58.0	16.477297800555643	-9.167983784619732
58.0	16.18268445028319	-5.721737036103015
58.0	11.847940023565156	2.596514263533064
58.0	-12.910785704521755	12.873528000832566
58.0	-21.48908812996162	6.483940762744481
59.0	-2.6952736559306545	-1.902574753619093
59.0	4.514613411893119	1.829098098071957
59.0	-1.8193397559624647	0.073476655547138
60.0	18.789183868293634	-3.146099654708205
60.0	-0.28020018826772386	21.439573040076397
60.0	-16.812036558265273	13.48250915686832
60.0	-16.379822226826093	-1.2220718928047836
60.0	-13.679284256754203	-5.720765360785589
60.0	11.17865041037376	-14.788851587189505
60.0	17.183508951445923	-10.044293701456635
61.0	-11.22321149055519	-15.653802868193104
61.0	7.2482233594422105	-9.091420497079591
61.0	9.286143134388587	11.276196309232516
61.0	-5.311155003275598	13.469027056040199
62.0	-2.962998748628901	1.3711170193277882
62.0	-2.5627037544318636	-2.796157597752692
62.0	0.7131490663156127	-1.514634003852555
62.0	4.8125534367451515	2.9396745822774606
63.0	-4.034650438479431	0.019737458205760783
63.0	0.9119748180706914	-1.6946983855194175
63.0	6.7022296902130005	0.05207685476388857
63.0	-3.5795540698042747	1.6228840725497733
64.0	-4.266910667163968	-2.8293792881757045
64.0	2.6059343692033523	-2.9501307717629026
64.0	1.6609762979606013	5.779510059938593
65.0	-2.871603433853425	5.945293827434551
65.0	-6.064225165721157	-4.405780566176556
65.0	2.2046623143411352	-5.464276611500556
65.0	2.9167610230234873	-2.5518030891515315
65.0	3.81440526220993	6.476566439394093
66.0	-4.201126249425055	-8.468937408677512
66.0	11.776076852626058	-19.294014750628456
66.0	4.596593523045346	8.545455423299693
66.0	-5.2276430221636945	10.077420584301663
66.0	-6.943901104082651	9.140076151704603
67.0	-5.354982744412297	-0.23627241366237398
67.0	4.519105067562359	-7.06183587914844
67.0	0.8358776768499244	7.298108292810812
68.0	0.8649311784047327	-1.721280901984595
68.0	-0.7251552882653122	2.8015655966414603
68.0	-0.1397758901394374	-1.080284694656854
69.0	2.7284318602738358	-10.448725564561729
69.0	6.520858966394632	-9.518981276772084
69.0	0.6764244584895749	10.069356008017515
69.0	-4.868714166278399	5.116243717613226
69.0	-5.057001118879645	4.782107115703087
70.0	-0.2563132033166231	-5.175356550636488
70.0	2.1034584872112205	4.286428389589558
70.0	-1.4763376325265556	6.0123832046831
70.0	-0.3708076513680547	-5.1234550436361515
71.0	-0.7556932983883717	0.5336979257201062
71.0	-0.9110190599103076	-0.6748168591433386
71.0	1.6667123582986472	0.14111893342320103
72.0	8.230821399707592	-6.533384008270949
72.0	13.775439909230172	-2.6871891696072514
72.0	12.628300656144333	-0.9612466585247352
72.0	0.8191773742091258	3.5592812113391834
72.0	-17.06665891624258	4.3239698248007725
72.0	-18.387080423048644	2.2985688002629576
73.0	2.8539114722419687	-3.0378347059899213
73.0	6.406908415748008	-0.10214260313947698
73.0	6.5565084369020825	4.024364791715184
73.0	-8.560690476710562	4.624624762263546
73.0	-7.256637848181498	-5.509012244849336
74.0	6.245989784777066	-3.6947078828854494
74.0	-3.2533809995689293	5.896182896894034
74.0	-4.966709065621753	4.271256659544072
74.0	1.974100280413616	-6.472731673552661
75.0	-1.6938895721238922	1.6040686967802626
75.0	0.9581217647775492	-2.4844582613443866
75.0	2.3988146371901933	-0.7190488166892712
75.0	-1.6630468298438452	1.5994383812534085
76.0	6.655789213734002	5.288285467967187
76.0	-1.5391669924124685	17.153149012319993
76.0	-3.6986970243422315	-9.867848152060663
76.0	-1.4179251969793079	-12.573586328226508
77.0	9.445836817361212	-4.948014914899042
77.0	5.6937202353805345	-0.019784069015357453
77.0	-6.600048683142788	4.587709789079505
77.0	-8.539508369598964	0.38008919483492587
78.0	7.8204202852436016	3.090037982802593
78.0	-7.9082015993951575	6.7281146303396335
78.0	-9.02565795235394	-1.5119957778881274
78.0	2.7219677823492185	-5.1531432450018935
78.0	6.391471484156274	-3.153013590252219
79.0	0.11628931020985322	0.8931016635459547
79.0	-0.3150367097185318	-0.6260851886055329
79.0	0.019588393263458737	-1.159329013763419
79.0	0.1791590062452328	0.8923125388230149
80.0	3.336904858762095	5.282339294775046
80.0	-3.6544234760001886	3.7491542791541868
80.0	0.31751861723808616	-9.031493573929245
81.0	-1.7401434014626522	4.952009602441654
81.0	-4.558173211793239	-2.174002647652881
81.0	1.83796892533466	-6.720205003161
81.0	2.735900034257421	0.03882667778419213
81.0	1.7244476536637903	3.9033713705879807
82.0	-3.570167669795612	-0.05662767836955607
82.0	-0.39463951342460435	-5.729366558748511
82.0	2.4141772535518062	1.61623482852157
82.0	1.5506299296683996	4.1697594085964855
83.0	3.9624120575059756	4.764864287077999
83.0	-5.513801470384725	3.1171612221830594
83.0	-3.123871576210926	-8.296426622349532
83.0	4.67526098908967	0.41440111308849925
84.0	-3.1520843078748726	4.425838939892486
84.0	-3.1613523628011047	4.371293930720647
84.0	-2.1157459922270334	-2.6201452122719613
84.0	4.05233530277067	-7.883149257916157
84.0	5.4498516502373455	-3.98155263070813
84.0	-1.0730042901050072	5.6877142302830705
85.0	-0.19729501445584494	0.5999726149078443
85.0	0.12222690609346554	-1.5692016656470356
85.0	0.0750681083623892	0.9692290507391611
86.0	-2.109683300457381	0.3266330286100815
86.0	1.4738358672809557	-1.6216155963640801
86.0	0.6358474331764123	1.2949825677539932
87.0	-0.05614460573096869	-3.334379744392011
87.0	4.033882324644743	-1.9821586388672543
87.0	-0.6158685212508215	5.025733424341078
87.0	-3.361869197662998	0.2908049589181825
88.0	1.7369962132154104	-9.394327245308633
88.0	14.569369656254292	2.2671637013560706
88.0	12.796394226297094	4.966157569365562
88.0	0.878278029914037	6.176932741005826
88.0	-13.970029186569093	0.04690223777710978
88.0	-16.011008939111736	-4.0628290041959225
89.0	3.702714420358182	-3.914360789101271
89.0	2.3500254525638544	12.81316023066796
89.0	-4.510793099512508	1.3668012899847293
89.0	-1.5419467734095436	-10.265600731551412
90.0	0.21631678019187928	-2.1568001117550852
90.0	0.7223377629861473	2.0911017309969786
90.0	0.7070295445648465	2.1185331771710967
90.0	-1.248672720190692	0.21294190982085276
90.0	-0.3970113675521809	-2.265776706233843
91.0	-0.8470849567189198	2.3190334463842155
91.0	-4.411319953343899	-2.0133656985692507
91.0	1.2800959354845887	-1.281311049840779
91.0	3.9783089745782103	0.9756433020258346
92.0	3.4637628830889455	5.036008148418089
92.0	-2.2780527538775117	-2.3336960110464666
92.0	-1.1857101292114298	-2.702312137371617
93.0	8.679753950448953	-2.1213450891174603
93.0	-9.617084479196697	5.913603544931777
93.0	-8.800434896188067	3.1859090035912354
93.0	3.1047633891433115	-3.9586661115874495
93.0	6.6330020357924955	-3.0195013478181183
94.0	-1.0146386349731196	-0.12449361097280365
94.0	0.45691956121954064	-0.5989550126830174
94.0	0.5577190737535804	0.7234486236558243
95.0	-7.677540555170312	-0.6383388540859407
95.0	6.56245553966569	-5.158201260677231
95.0	1.1150850155046124	5.796540114763159
96.0	-15.567130942979759	13.515277206198306
96.0	-17.921922276842068	4.087558763564099
96.0	9.778064947476961	-11.075197211398283
96.0	12.71635729960938	-7.445003833786938
96.0	10.99463097273549	0.917365075422814
97.0	6.252835316351323	4.796352526685224
97.0	4.314645156731295	8.283818745023579
97.0	-7.915034094526845	-2.3205287199083027
97.0	-3.453880875263575	-5.854575860612444
97.0	0.8014344967078034	-4.905066691188021
98.0	0.44576439944360335	-3.786403833735399
98.0	2.023394625325642	-2.6190072454291733
98.0	4.281573278949471	4.966568820719495
98.0	-6.750732303718712	1.438842258445074
99.0	-3.748313993628166	0.8775323861342321
99.0	3.439469044869393	-1.7984729710440035
99.0	3.8892414615934907	-0.20542320821302185
99.0	-3.5803965128346915	1.1263637931227823
100.0	0.07339874674820455	-0.03196284344514698
100.0	0.109950918336047	0.07566345695955697
100.0	-0.18334966508425493	-0.043700613514416245
101.0	-5.202408579190345	-8.875576132358125
101.0	0.9826695384866992	-10.478806030706346
101.0	3.482520410650215	-0.8172722965346388
101.0	2.9112318142371616	9.703924412970494
101.0	-2.174013184183732	10.46773004662862
102.0	-0.09222698101683824	-2.140661962351113
102.0	2.833131147682284	-0.12753555667598504
102.0	-2.740904166665432	2.2681975190270736
103.0	5.307417407896251	-6.908836006806938
103.0	5.331128305082668	17.19488725633464
103.0	-7.448093746933065	17.194634315775367
103.0	-1.7333178906355986	-13.790929955901321
103.0	-1.4571340754102522	-13.689755609401749
104.0	-1.3541261138790528	7.821775799468113
104.0	-2.5668658728518956	7.336374997789318
104.0	-5.302422858224479	-3.25645895806567
104.0	4.521964213748765	-7.699822705673813
104.0	4.701450631206661	-4.201869133517945
105.0	3.319239285712311	-3.6607331309605025
105.0	2.9219981027982227	4.945029104209489
105.0	-6.2412373885105366	-1.2842959732489712
106.0	2.0585331430542024	5.412472161663009
106.0	-5.782098283706399	-1.1709015877489373
106.0	-3.8417776144999527	-4.435912747949118
106.0	7.565342755152151	0.19434217403504528
107.0	5.949140072449728	-7.100455527553757
107.0	11.438314910714315	1.1680317727788365
107.0	10.56956697945305	4.45248511248968
107.0	-12.591492510639732	2.1720070867506696
107.0	-15.36552945197737	-0.6920684444654039
108.0	-2.1917417617654498	3.192512361822865
108.0	-2.6160764151564733	-2.6230993858706233
108.0	1.926403588397946	-3.6546694169499547
108.0	2.881414588523933	3.0852564409977092
109.0	1.8207729974990003	1.2955951369197787
109.0	-0.33197546559474556	4.047248837578083
109.0	-1.488797531904247	-5.342843974497874
110.0	-2.326611892040214	-7.535763399272003
110.0	4.679584994097178	-6.272681786252952
110.0	1.1533747505438048	8.334658810470199
110.0	-3.5063478526007454	5.4737863750547735
111.0	-4.398335715776877	-2.113552387202129
111.0	2.2586928636676236	-9.76332654265474
111.0	2.1396428521092448	11.87687892985688
112.0	-0.9326224679124446	-0.12211870678077874
112.0	2.247643072336877	-0.2871628668918571
112.0	-1.3150206044244321	0.4092815736726359
113.0	-2.4292772250693804	0.35637545932708115
113.0	2.3184752282940333	-1.5244562968472597
113.0	0.11080199677534863	1.1680808375201945
114.0	3.1456885005119197	-7.564520659609717
114.0	3.284473384668081	7.519174482601581
114.0	-7.410917394657379	8.264017427502434
114.0	0.9807555094773486	-8.21867125049433
115.0	-1.1703669598853965	3.714247149864267
115.0	-1.2969401742881352	-2.0766079820824275
115.0	2.4673071341735517	-1.6376391677818403
116.0	3.4096092676603273	2.428647105652204
116.0	-3.243143552398611	-1.263997241541152
116.0	-2.7250191253416154	-1.5702332256357598
116.0	2.5585534100798677	0.40558336152469143
117.0	0.18524179012073466	-1.7142733474549112
117.0	1.9674584324053146	0.15572837267820155
117.0	-2.1527002225260796	1.5585449747767008
118.0	1.2810396982897383	7.556828856752979
118.0	-5.880565815188911	-13.003034854026241
118.0	4.59952611689918	5.446205997273275
119.0	0.11748055785002043	0.12428845495998439
119.0	-0.0791157759536289	-0.04451344404227354
119.0	-0.03836478189638672	-0.07977501091770532
120.0	-4.809468108475804	-2.127592330911039
120.0	1.8183614689173466	-0.8531554514447275
120.0	2.9911066395584562	2.9807477823557598
121.0	0.8256354733183666	4.372179432123121
121.0	-3.9024283606967924	0.01607330238325022
121.0	3.0767928873784234	-4.388252734506352
122.0	0.0019555603916747255	-0.001771629420130126
122.0	-0.0012315884889304927	0.002786776321627997
122.0	-0.0007239719027338864	-0.0010151469014881296
