# Supplementary material
Source: ML conference proceedings conference paper supplement (https://openaccess.thecvf.com/content/CVPR2021/html/Harel_Crossing_Cuts_Polygonal_CVPR_2021_paper.html)
Supplement: Supplementary file 2 [file Harel_Crossing_Cuts_Polygonal_CVPR_2021_supplemental.zip › Dataset/D3/p5/pieces.csv]

piece	x	y
0.0	-3.255162456806729	-1.9693248134653967
0.0	4.3737802821280845	-2.06315524031955
0.0	1.1679411552138268	2.601420654673611
0.0	-2.286558980535181	1.4310593991113367
1.0	5.826013721527726	-10.487032698291724
1.0	-0.29222834162156275	11.034333692813469
1.0	-0.35867169820062816	11.06750261198399
1.0	-9.92183716730982	-1.206003940425202
1.0	4.746723485604283	-10.408799666080526
2.0	0.770523024836745	-5.081512428484867
2.0	1.6260788622805586	-5.0416382460647515
2.0	2.1169665056339406	1.804919826127247
2.0	-4.513568392751234	8.318230848422346
3.0	-3.7414956735800002	4.3960421881442
3.0	-2.6361339477067363	-3.5919716747959534
3.0	6.377629621286729	-0.8040705133482491
4.0	0.22571456174510907	2.2300389404942704
4.0	-0.3723314566355753	-1.2350013780507108
4.0	0.14661689489045832	-0.995037562443561
5.0	-3.0252823397718376	0.16132578271348663
5.0	-1.1592886249644259	-1.4747997483290047
5.0	1.6344556019528804	-3.1957648940060914
5.0	2.3221878387842834	2.209531594187217
5.0	0.2279275239991014	2.2997072654343924
6.0	-9.862490594739699	-19.832949105864664
6.0	13.203371422511642	-2.8544142027002524
6.0	14.60549420053725	-1.3793457869414931
6.0	15.251666695481108	0.6214107756761535
6.0	-4.539092002709951	15.929497674535567
6.0	-6.05277650617743	15.164220533553472
6.0	-9.775262026618506	6.670717207116281
6.0	-12.830911188284443	-14.319137095375085
7.0	5.885872510009522	3.421806427586337
7.0	3.7868306281282385	4.2446736016512325
7.0	-3.7041047006584167	1.0142663184270941
7.0	-4.618559136648639	0.07317207872628861
7.0	-7.732196876313927	-5.378086040427254
7.0	6.382157575483214	-3.3758323859637365
8.0	-0.5914156141196147	17.94594165917231
8.0	-6.296926741423567	18.673704330922014
8.0	-17.180127771930515	-14.663687189780074
8.0	6.263426373418421	-12.389437910961446
8.0	6.630355259667713	-12.242709855569728
8.0	11.174688494387542	2.676188966216912
9.0	-7.393678750348711	3.00026339477961
9.0	-5.767146417433571	-0.06085533048028946
9.0	6.244906115984683	-1.7610911178999338
9.0	6.915919051797594	-1.1783169463993728
10.0	-6.06687020501133	-5.528500140467761
10.0	-1.5111331601186548	-6.18675985014807
10.0	3.8095819404924693	5.79716748976706
10.0	3.768421424637505	5.918092500848798
11.0	-2.046310953088397	2.9105743549823773
11.0	-4.208816066399127	-1.6530287203773621
11.0	2.6765053011757303	-3.0114736114909144
11.0	3.578621718311776	1.753927976885888
12.0	16.397491929632633	-5.845243329098869
12.0	18.166584976663234	-4.550927377160001
12.0	-4.258027417459855	5.239770713359062
12.0	-15.359650063200045	3.5304936831384053
12.0	-14.94639942563591	1.625906309761413
13.0	0.35869781112040733	-0.6229058709679913
13.0	0.30500579758698687	0.5447837780152014
13.0	-0.6637036087073842	0.07812209295280009
14.0	-5.154912201502363	-9.084935856113493
14.0	6.911239404117278	4.558982336698265
14.0	6.056177519500484	10.72587980918357
14.0	-7.812504722115408	-6.19992628976834
15.0	-7.807081521484587	1.2158049063595953
15.0	-4.070462312833295	-4.239611960473783
15.0	4.27207343666184	-7.480082898037442
15.0	4.377749891015247	-7.432211288016889
15.0	8.881786795469278	13.892501419695876
15.0	-5.654066288828475	4.043599820472625
16.0	-0.3307152458198336	0.07673162210169056
16.0	-0.18709805551009656	-0.5266318993989773
16.0	0.5178133013299319	0.4499002772972874
17.0	-1.2328735374170632	-0.3610567590637235
17.0	-0.7293871360693388	-0.8637474355976547
17.0	0.8369268029153102	0.34222101061601784
17.0	1.1253338705710885	0.8825831840453542
18.0	9.95572611952154	5.5677277027158345
18.0	-17.41464446872764	-3.5234450732200875
18.0	-3.1487835552093304	-7.289136160110301
18.0	10.607701904415439	5.244853530614536
19.0	0.8494248843372447	-1.114084427328973
19.0	0.15174508365573175	1.8390877204582594
19.0	-0.5468638106951855	0.6793136718704813
19.0	-0.45430615729779034	-1.4043169649997698
20.0	0.12326372254080464	-6.810073885186615
20.0	2.7445492147160677	-7.373837756274829
20.0	5.90215218919893	-4.986809740921181
20.0	0.18658331043268817	9.057253709591505
20.0	-4.953211437837683	12.334292008924315
20.0	-4.003336999050829	-2.2208243361332127
21.0	1.1434363451559961	2.2789810346510286
21.0	-2.9325585826746905	-2.164937465942558
21.0	1.7891222375186853	-0.11404356870847532
22.0	12.20459765953989	1.4326030334991793
22.0	12.13240683059284	1.6247553747044794
22.0	1.4701472340199988	4.659924622357086
22.0	-17.56168829824037	-1.7700894954608257
22.0	-8.245463425912373	-5.947193535099926
23.0	-6.490579510759276	0.6760809907402545
23.0	-11.797701506392466	-11.194958118956093
23.0	-10.450312726065556	-13.337032674904782
23.0	13.1471862525395	7.736271146981704
23.0	13.10205293927001	7.742464816427208
23.0	2.489354551407788	8.377173839711709
24.0	-6.433500998448983	8.457348905289694
24.0	-6.43980640353246	8.093925968644152
24.0	0.7939551378458545	-11.808563679952382
24.0	4.401931365755541	-8.27626848374016
24.0	7.677420898380029	3.5335572897586798
25.0	-5.041933057338926	-8.802431459532972
25.0	6.376424654810332	4.734733809326087
25.0	-1.334491597471397	4.067697650206895
26.0	4.03004666695085	-6.7240748729466535
26.0	9.578253395146803	21.609294528168775
26.0	5.823494548874066	19.219431136134023
26.0	-12.801484953028732	-16.421757690956298
26.0	-6.6303096579429734	-17.682893100399873
27.0	1.2119767791557576	6.648726387597364
27.0	-5.197724646183058	-6.6265396666301575
27.0	0.4535778591301418	-7.828770008512456
27.0	3.532170007897157	7.806583287545266
28.0	-5.477281842618705	-6.371146754865047
28.0	4.161676143931379	-0.7955429587912617
28.0	4.600709444462637	4.040841956380527
28.0	3.6525168940383734	4.6932110335322665
28.0	-6.9376206398137015	-1.5673632762564953
29.0	2.77398589085752	-4.523168381165795
29.0	0.7595880777646018	3.28677718414666
29.0	-1.681525348318496	1.8135585129937803
29.0	-1.852048620303626	-0.5771673159746459
30.0	-2.791999163080643	2.6200138328765377
30.0	-4.957946441226779	-2.4669612787640522
30.0	7.749945604307426	-0.15305255411248497
31.0	-3.6447247085990657	4.612344257368434
31.0	2.7241487018242982	-7.480333184911007
31.0	4.215900923428531	-8.411306833600655
31.0	-0.6383081176593757	5.325184731838714
31.0	-2.657016798994394	5.954111029304486
32.0	6.543661824817779	7.081765050230823
32.0	-1.3831852986297521	7.6738286887821765
32.0	-4.907171961106671	-6.791259272603006
32.0	-0.25330456508135324	-7.964334466409985
33.0	-5.886067392031382	6.6130477617755785
33.0	-0.37239317236644887	-11.620474581419995
33.0	6.258460564397847	5.00742681964442
34.0	0.21014828301849542	-3.1393581792488123
34.0	3.3593636655090506	2.474428525913318
34.0	-3.569511948527552	0.6649296533355025
35.0	-6.761859580573988	6.26164959242354
35.0	2.16305808874377	-6.510301705966405
35.0	10.84347921491883	-6.217598345046493
35.0	-6.244677723088582	6.466250458589399
36.0	-0.6432440957328525	-0.2866776579096676
36.0	0.08142275950826616	-0.3547913821533809
36.0	0.5618213362246035	0.6414690400630612
37.0	2.356536030228315	0.7088891036242968
37.0	-1.1956773054288807	1.5974965879007443
37.0	-1.1608587247994304	-2.3063856915250547
38.0	0.8371370380135508	14.962695871100472
38.0	-14.46111794152754	-3.572138682470377
38.0	2.56194911725526	-23.258920073630378
38.0	8.98136494963089	-3.0304219598479274
38.0	2.080666836627814	14.898784844848215
39.0	-3.5498515522253657	5.08517816767829
39.0	-3.162727683209549	2.452569356824944
39.0	2.965248484496119	-4.154229128573626
39.0	3.7473307509388043	-3.383518395929618
40.0	-0.55241546816467	-0.03701703713557011
40.0	-0.08660774985464892	-0.12795733876491905
40.0	0.6390232180193163	0.16497437590048258
41.0	-9.15193923977933	-0.2299950032614011
41.0	9.350044451339393	-7.021492341733984
41.0	11.869658040805115	2.6135497786325086
41.0	-12.067763252365236	4.637937566362877
42.0	0.731907407445245	-1.9526181053024545
42.0	1.6706271540859277	2.3273709640252265
42.0	-2.402534561531161	-0.37475285872276454
43.0	5.445415888045847	-6.848579772975183
43.0	-7.259920975628424	16.139060598885145
43.0	-4.0742876644182076	-1.090420996105707
43.0	5.888792752000781	-8.200059829804268
44.0	0.39977669139435706	2.040371673218382
44.0	0.19668100404887012	2.008143831863766
44.0	-3.340942424542782	-3.2501649435607103
44.0	2.744484729099557	-0.7983505615214151
45.0	4.102364084884536	7.7539594674944965
45.0	0.9454100592121077	8.760222474996068
45.0	-5.865168041790029	1.2739365440449213
45.0	-6.412074878036148	-19.064033497498336
45.0	7.229468775729538	1.2759150109628412
46.0	4.6463073035366875	4.456218148270071
46.0	2.1090004137460747	6.492151634578596
46.0	-5.32928898757446	-1.0678048605581587
46.0	-1.7280745429156723	-5.21188263628371
46.0	0.3020558132073403	-4.668682286006778
47.0	-2.882064522354701	1.0150049503824827
47.0	-2.5371255106767174	-3.31566711252494
47.0	2.830026603627618	-4.995770434806157
47.0	2.3365806026449847	2.738822999808169
47.0	0.2525828267587982	4.557609597140446
48.0	0.036332193557177206	2.8844578012813575
48.0	-4.1608367204484376	0.1657756568759795
48.0	4.124504526891258	-3.0502334581573365
49.0	0.7801366806915943	-1.0543729322374027
49.0	0.6412287729009816	0.4276801659561392
49.0	-1.4213654535925748	0.6266927662812634
50.0	1.7166524524957385	-1.9566841619000346
50.0	-0.060721950967987603	2.541931484602814
50.0	-1.2995694367352397	2.0680828937841844
50.0	-0.3563610647925114	-2.653330216486964
51.0	3.9360527219181822	-1.2171443003611846
51.0	1.1039358233956293	2.4135170327428996
51.0	-4.448675758187237	1.8441802676388344
51.0	-0.5913127871265831	-3.0405530000205627
52.0	-1.3865412927519063	-1.1369401897984805
52.0	1.1740371735463366	-0.07157319436081488
52.0	1.147511892576689	0.09112682029220592
52.0	-0.9350077733711135	1.1173865638670932
53.0	-8.136477088057132	3.6898210318497573
53.0	9.183002356295384	-6.500223170059295
53.0	8.04989669692708	-4.080060492997288
53.0	-9.09642196516533	6.890462631206825
54.0	-6.665313813708577	-7.081292941611769
54.0	5.082665468937294	-7.00755940265477
54.0	7.0907269485274185	-4.070232987660175
54.0	-2.417682929311882	9.432998389707004
54.0	-3.0903956744442653	8.726086942219721
55.0	2.494861395312931	-0.96692947655255
55.0	-0.6986982733672336	2.089229190030932
55.0	-1.7961631219456928	-1.1222997134783668
56.0	0.8859509968661022	-1.3791049540571152
56.0	4.508012795619047	5.325067714655254
56.0	-4.978118804203017	-1.668412549565957
56.0	-0.4158449882821196	-2.2775502110321755
57.0	0.49103618644593705	2.194799004090334
57.0	-2.0193672179529423	-0.9979826264191782
57.0	1.5283310315069767	-1.1968163776711576
58.0	-5.2498998713823485e-05	0.0002508425091988001
58.0	-0.00021903210214242708	-0.00024568151791260726
58.0	0.0002715311008517317	-5.160991299666049e-06
59.0	2.5035205357214725	0.8678281584791299
59.0	-2.2904577670928576	1.2075061380052141
59.0	-2.5513748595080767	-2.303347130104687
59.0	2.3383120908794606	0.22801283362033997
60.0	9.790263883227954	-13.201298423149117
60.0	-0.48113196440197337	7.409534987919502
60.0	-6.382441859580123	10.159849267946795
60.0	-7.087163420337246	9.318182363392246
60.0	4.160473361091457	-13.68626819610944
61.0	0.5852310780826563	-0.20012138756459524
61.0	-0.0760603430260555	0.6669920446117985
61.0	-0.5091707350565993	-0.4668706570472064
62.0	-1.160599488070388	-3.217484004414155
62.0	4.1497703658928815	-7.970784979590723
62.0	5.406087158860052	3.0913656498803608
62.0	-8.395258036682511	8.096903334124509
63.0	5.246808171888358	-2.481507483542371
63.0	-1.809358806336736	12.094199504570144
63.0	-3.3710295064906908	-2.8708607314356733
63.0	-0.06641985906094194	-6.741831289592102
64.0	-1.0894717773460858	2.7061286361976484
64.0	-4.883619171949792	-0.022806579581888253
64.0	-4.981117431842052	-1.5724883474312816
64.0	5.590260691879169	-1.5392825586731052
64.0	5.363947689258757	0.4284488494886406
65.0	1.655301809476345	4.4469923646974845
65.0	-1.9840376989895507	-2.7956855573057213
65.0	0.32873588951319593	-1.6513068073917612
66.0	0.2601035847606937	-1.111840717786143
66.0	0.3130868069433965	0.9080637876293902
66.0	-0.17846573523752687	0.722029546719694
66.0	-0.3947246564665564	-0.5182526165629388
67.0	4.352542763169757	1.4802912178080219
67.0	-2.5756313022690773	4.691610036662477
67.0	-4.864923949984777	1.8972898606697084
67.0	-1.8959334748153225	-6.027888931636596
67.0	4.9839459638994095	-2.0413021835035843
68.0	2.6126732217513786	-1.1699773068583674
68.0	-0.6240021891491663	4.4097589852561265
68.0	-1.466419444217298	-1.1422103950477553
68.0	-0.522251588384875	-2.09757128335001
69.0	-0.377159549679689	-1.4375189894078948
69.0	3.158624158452104	0.14842067066765868
69.0	-2.781464608772418	1.2890983187402578
70.0	-1.3468911541899775	6.505036487405144
70.0	-1.516181507255733	-7.795743847924474
70.0	1.573199605623071	-4.410568249733001
70.0	1.2898730558226412	5.70127561025233
71.0	8.87112745496254	6.82354738823142
71.0	9.297489699138893	16.105161685079537
71.0	-16.148883290964367	-3.5539539180101754
71.0	-2.8345755980033047	-10.29906518167856
71.0	0.8148417348662544	-9.07568997362221
72.0	1.868565099380707	9.592749584564041
72.0	-13.800346804906134	3.405056032435885
72.0	-4.88374072469591	-6.014981468711866
72.0	16.815522430221343	-6.982824148288053
73.0	0.15648023587302795	-1.9991131125579111
73.0	2.147822370506007	-0.764043150459361
73.0	0.9352339566958804	3.0466437131984563
73.0	-1.5522976006616038	0.9175729796216658
73.0	-1.687238962413329	-1.2010604298028311
74.0	11.345936517212648	-8.790432121853625
74.0	4.95836114397164	15.987033368879056
74.0	-14.328749005647792	0.07947037331056261
74.0	-1.9755486555364994	-7.2760716203359985
75.0	-3.4792703629414428	-5.430521673103414
75.0	5.64962196920381	1.3942208082246357
75.0	6.667029938806556	7.695924036832514
75.0	-8.837381545068885	-3.659623171953761
76.0	0.7970663068060224	-14.440267831263
76.0	9.56544684532734	-3.1242199186676403
76.0	5.626561615890104	12.356241301987634
76.0	-5.547704962409214	9.74639814770254
76.0	-10.44136980561426	-4.538151699759503
77.0	2.4841714272943363	-0.43306748363294645
77.0	2.4092326470537815	3.0382663419547935
77.0	-3.1016364497439906	-0.9364219191423249
77.0	-1.7917676246041205	-1.6687769391795253
78.0	4.3512755199826865	-6.143844375267949
78.0	0.3377057613991694	3.9963929664627518
78.0	-5.262964900747132	9.193517706891834
78.0	0.5739836193652694	-7.046066298086626
79.0	-6.047635901420449	6.326846594725573
79.0	3.4530425940635747	-14.59840498190033
79.0	6.898604139420691	-5.011884104596977
79.0	1.7416422904906166	6.943949340199704
79.0	-6.045653122554432	6.339493151572031
80.0	-0.9946332487423701	0.14123656519510808
80.0	0.632123362542395	-1.1436527184554823
80.0	0.36250988619997765	1.0024161532603717
81.0	7.333879931853936	4.022777220771495
81.0	-10.923520316497166	7.542784854869602
81.0	-5.118625866253818	-6.876282425294151
81.0	8.708266250897038	-4.689279650346976
82.0	0.5739238883275584	1.170402231552634
82.0	-0.6304385397042654	-0.34769922534865666
82.0	0.056514651376701946	-0.8227030062039979
83.0	4.4310346495369375	4.035024565339965
83.0	-7.597261741787458	-2.172571322459844
83.0	-2.506859978995023	-4.104186106357513
83.0	5.673087071245547	2.241732863477395
84.0	13.688403116771909	8.775127237874585
84.0	13.015036147147466	9.659739699995862
84.0	-21.18416401882616	1.785674518754571
84.0	-13.928788629244915	-14.969031353222409
84.0	8.409513384151712	-5.2515101034026035
85.0	-1.156040836541806	3.286266513450884
85.0	-2.3653256119506887	1.8260866235896953
85.0	1.7771657908493432	-2.8072482231921723
85.0	1.7442006576431517	-2.3051049138484
86.0	8.176660260828118	-0.7037211592994668
86.0	7.365969416812231	1.7043022189543793
86.0	-9.465543138402056	2.5517492654083465
86.0	-9.241653126184062	1.8210415508509303
86.0	3.164566586945781	-5.373371875914194
87.0	0.9455330630288233	-0.8467440350482882
87.0	0.7825967736164277	1.8382447220051916
87.0	-1.7281298366452367	-0.9915006869569027
88.0	-5.535610971384374	4.973479846593451
88.0	-5.659287505997544	4.8706790676408565
88.0	-2.7903099083526754	-2.7096212044104013
88.0	7.093557955340616	-9.429610998447188
88.0	6.891650430393952	2.295073288623276
89.0	6.231420409251875	-0.8627519166975799
89.0	2.85096459672874	3.6819182936876462
89.0	-1.258272444490607	3.5594692614927634
89.0	-7.824112561490016	-6.3786356384828276
90.0	-9.560764594483139	-3.8630813998784976
90.0	3.349722822075993	-4.169515800632973
90.0	4.630586614645454	-1.196459429249287
90.0	2.112022102163005	4.76555198639459
90.0	-0.5315669444013391	4.463504643366166
91.0	0.7114392947247632	-3.819920149029201
91.0	1.6953680549602215	-1.0333805109038305
91.0	-2.406807349684978	4.853300659933034
92.0	-1.9127343147740934	-1.9379048482605026
92.0	2.7277144670259843	-0.565759978341589
92.0	0.3670119121286093	1.2756595844460636
92.0	-1.1819920643805	1.228005242156028
93.0	10.27091832734169	-3.378996568410498
93.0	-3.989510910575692	8.08269759536823
93.0	-9.919121894638732	9.625092454151165
93.0	-14.078925372741763	5.914977687131682
93.0	2.670998270812546	-8.143849987396607
93.0	5.511748136456244	-7.775522136895834
93.0	9.533893443345722	-4.324399043948151
94.0	9.310213489407822	15.527488770376046
94.0	-5.176272532955765	-2.9870359835560008
94.0	-4.6129797685003044	-4.005896298972261
94.0	-1.0832940854669646	-4.350272279300546
94.0	1.5623328975151871	-4.1842842085471945
95.0	-4.010528220615973	3.80389418090188
95.0	9.315616357560911	-18.837620212502976
95.0	-0.6401193085783419	7.954849559798204
95.0	-4.664968828366609	7.078876471802875
96.0	0.7950635663599983	-2.215843234582255
96.0	0.7194171127591946	1.4469047203377183
96.0	-0.3492976207368396	1.7831842096907171
96.0	-1.1651830583823601	-1.0142456954461676
97.0	0.3569634291922693	-0.7271578754807646
97.0	-0.3314325678717386	1.1060010498924888
97.0	-0.02553086132053556	-0.37884317441172943
98.0	-0.5515002252617169	0.57567391351237
98.0	-0.8376180992972033	0.35663148443223813
98.0	1.3891183245589214	-0.9323053979446008
99.0	16.132453104486203	0.2540653682427205
99.0	-6.311546822894265	5.392463008186467
99.0	-8.214930069823913	2.596562573269285
99.0	-1.6059762117680245	-8.243090949698473
100.0	-2.767283961552072	-0.757694018755042
100.0	0.6876417454930358	-4.419644842623717
100.0	1.0718020887428532	2.581901079787033
100.0	1.007840127316186	2.595437781591719
101.0	-6.950881960814781	-13.858538673733996
101.0	1.0301475470227368	-15.174324667250087
101.0	12.96895028423663	-2.892616623396459
101.0	-7.048215870444571	31.92547996438053
102.0	2.8899054205110692	-6.080526631244407
102.0	2.1662833101195504	5.973284082142405
102.0	-5.056188730630609	0.10724254910201125
103.0	-3.0461338628158527	5.406127668213182
103.0	-1.432336967278066	-6.989592112769881
103.0	3.387738782759639	-7.679228751748243
103.0	1.0907320473342943	9.262693196304948
104.0	6.224601609962861	-0.1673218082781498
104.0	-6.424834860221635	2.750387528912812
104.0	-4.543228235881714	-0.04029751374462376
104.0	4.743461486140488	-2.542768206890039
105.0	0.667150767081649	-0.01934025790124469
105.0	-0.6057657416550496	0.7644972901273892
105.0	-0.06138502542661228	-0.7451570322261383
106.0	2.221365318281095	-1.3505516188019064
106.0	1.8023738937497586	1.4963975537685998
106.0	-2.3052357355934325	0.8254686921150015
106.0	-1.7185034764374407	-0.9713146270816979
107.0	-11.54407534827327	-7.395611614906024
107.0	0.9565179069246156	-2.451634203292236
107.0	5.1940478098665785	4.560441235538688
107.0	5.393509631482072	5.286804582659578
108.0	-0.8505368820591905	-2.398224520279398
108.0	0.953488541350744	-3.672279379054657
108.0	0.28692442916465133	3.115445944378737
108.0	-0.389876088456206	2.9550579549553344
109.0	-1.0500127577590301	3.3930518007897397
109.0	-1.9043338700160912	0.2515851621979227
109.0	2.9543466277751396	-3.6446369629876707
110.0	-0.03140325049588291	-1.5691818299559275
110.0	1.554907472952468	0.3279845829755563
110.0	-1.523504222456582	1.2411972469803787
111.0	1.1515709242049907	1.770071386137998
111.0	0.0018652638286904	1.098425703811149
111.0	-1.1534361880336816	-2.8684970899491486
112.0	1.609152895378776	2.1914205818631682
112.0	-2.9923071357660653	0.7474334165558756
112.0	-2.276686839288838	-0.6326373936333283
112.0	3.6598410796761285	-2.3062166047857158
113.0	-0.6575376307239895	0.8801380339793368
113.0	-0.6019045509328793	-1.154796338239081
113.0	1.259442181656884	0.2746583042597493
114.0	5.810792763769828	3.4884718089006923
114.0	-6.565715344702538	5.1085545479961345
114.0	0.7549225809327096	-8.597026356896826
115.0	3.256436708245615	-6.820868877483886
115.0	2.4938256116856157	5.823279878499724
115.0	-3.98338127000655	3.9405818493808864
115.0	-1.766881049924679	-2.942992850396729
116.0	-0.7950881808385278	-0.016240034475930587
116.0	0.11276331250191751	-1.2687925897263446
116.0	0.6823248683366114	1.2850326242022763
117.0	-4.361824674123915	-2.7149925596910194
117.0	8.51474670035826	-2.8827112968885933
117.0	-4.152922026234334	5.597703856579642
118.0	6.044638705294875	-8.12440044255009
118.0	7.829417278195543	-3.507982074582241
118.0	-1.6806260392374868	13.885309055401686
118.0	-6.255822909169019	-0.48120457772148795
118.0	-5.937607035083893	-1.7717219605478685
119.0	0.9874107811553313	0.8444222887157836
119.0	-2.1394068356542615	-0.6473544971625445
119.0	1.1519960544989303	-0.19706779155323934
120.0	0.07935284497696077	-0.021285643805697318
120.0	-0.041463283812391075	0.06839057770873566
120.0	-0.03788956116454857	-0.047104933903033726
121.0	3.2025949226875854	1.631547858919912
121.0	-5.665487363352814	2.914918955548351
121.0	2.462892440665257	-4.546466814468267
122.0	6.898331022948266	4.583489203112196
122.0	-5.880472985102092	0.06873087851143467
122.0	-1.0178580378461812	-4.652220081623627
123.0	4.325583633581494	-0.9060026533425614
123.0	-2.8799299342301197	5.450192891994912
123.0	-1.4456536993513731	-4.544190238652349
124.0	1.6611054866967483	1.4558619236256445
124.0	-1.4181486841810858	-0.47201079329706985
124.0	-1.9978198445990907	-2.126530505116147
124.0	1.754863042083415	1.1426793747875794
125.0	-8.666024146682712	1.6007600774480015
125.0	-13.215089225314905	-5.854018441395162
125.0	1.5550758601110557	-5.4462150528882285
125.0	12.141828243855898	1.930157203447045
125.0	8.184209268030646	7.769316213388319
126.0	-3.647370846903355	3.194074429204096
126.0	-0.4763569181386227	-6.3582115311930325
126.0	4.1237277650419815	3.1641371019889233
127.0	-0.02847785676409842	6.851476262991118
127.0	-3.9864712992400433	-3.879521246057519
127.0	0.6081020339655487	-5.418944447520995
127.0	3.4068471220385868	2.446989430587408
128.0	-0.005104811330945064	-0.15531524761848572
128.0	0.07556293941732169	0.22228626147886993
128.0	-0.07045812808641788	-0.06697101386036641
129.0	8.858918929149228	5.811224570672885
129.0	1.967012665607895	7.180380212054395
129.0	-14.239868337332432	-4.239002326923973
129.0	3.413936742575319	-8.752602455803295
130.0	0.002936639196192246	-0.030492148463310338
130.0	0.036611284379063885	0.024038045188221252
130.0	-0.03954792357525427	0.006454103275092106
