# Supplementary material
Source: ML conference proceedings conference paper supplement (https://openaccess.thecvf.com/content/CVPR2021/html/Harel_Crossing_Cuts_Polygonal_CVPR_2021_paper.html)
Supplement: Supplementary file 2 [file Harel_Crossing_Cuts_Polygonal_CVPR_2021_supplemental.zip › Dataset/D3/p6/pieces.csv]

piece	x	y
0.0	5.146582758920994	-0.0876567166307907
0.0	-3.1137158866293007	6.535449315110763
0.0	-4.683964518469799	3.041097784315275
0.0	-1.8234741101860652	-5.5563400227526545
0.0	4.474571756364163	-3.932550360042548
1.0	-0.7386896082824412	-0.24534075755048618
1.0	1.0581342855438505	-0.8181396259304985
1.0	-0.31944467726139864	1.0634803834809752
2.0	-3.7451193671173257	1.392095324663539
2.0	-0.502075320624311	-9.219485461951546
2.0	4.2471946877416125	7.827390137287992
3.0	-1.501385620765573	4.180164453589067
3.0	-2.686605285208271	3.5485867435975234
3.0	-0.4364337141133617	-7.517201297961035
3.0	4.207654096871983	-5.083847959238958
3.0	0.4167705232152287	4.872298060013423
4.0	6.395894426977171	-6.92335421388091
4.0	7.195877364499605	0.20013849586073434
4.0	-4.073222300664416	7.310700272938985
4.0	-10.132733410950772	6.871448214052358
4.0	0.6141839201384205	-7.45893276897114
5.0	0.8797077090918876	-12.528442590845588
5.0	12.47933349794099	-16.895103314393854
5.0	1.7182922366377085	11.27173827782236
5.0	-6.805398466619801	9.394536963633513
5.0	-8.271934977050766	8.757270663783558
6.0	4.587625291860334	0.3916897040400935
6.0	0.3072998961939107	3.482811658831112
6.0	-2.5032064597019876	1.2772127075883881
6.0	-2.5047545575546866	-0.5930645743529462
6.0	0.11303582920235596	-4.5586494961066375
7.0	-1.6259202183893533	12.170641015934796
7.0	-14.566538750870963	1.68220785382682
7.0	7.868575029637329	-7.18258462186741
7.0	8.323883939622993	-6.670264247894207
8.0	-2.4514517588491467	-3.7083907280387507
8.0	-2.1696750855589997	-3.962203493980902
8.0	6.540906705194291	-3.7927023875207038
8.0	2.336628896504992	5.0485873907048
8.0	-4.256408757291136	6.414709218835585
9.0	-2.2020004738395027	-2.5444210683900117
9.0	2.8177936890411037	0.12772555831655633
9.0	3.1070943271112945	2.2841250888008586
9.0	-3.72288754231289	0.1325704212726011
10.0	6.41387451199895	-0.32459098122499425
10.0	-2.0241104684052473	5.082583716920819
10.0	-5.8687766704590665	1.4885092142039673
10.0	1.4790126268653645	-6.246501949899793
11.0	0.9121019697245538	3.823469089862035
11.0	-5.853458176686767	5.008343421714049
11.0	-7.140446291585539	4.4324751560424955
11.0	-3.8319313527129193	-1.7286521036912212
11.0	7.851649765582886	-6.155727355555933
11.0	8.062084085677757	-5.379908208371439
12.0	-0.647221637137019	-0.1962338521837826
12.0	-0.5728305544535853	-0.38262623934660195
12.0	1.2200521915905935	0.5788600915303729
13.0	0.22402426965188968	-1.1559116803005405
13.0	1.6467836031462115	0.12338608512734232
13.0	-0.2883993105086	2.321737895287978
13.0	-1.582408562289545	-1.2892123001147342
14.0	4.564272002685017	-11.90257545386087
14.0	19.081044567631825	14.290716570375036
14.0	-4.204153301882227	7.425885228132085
14.0	-19.44116326843463	-9.814026344646244
15.0	-10.33899627522713	11.815901456519319
15.0	-6.1525200557757875	0.41934729722950786
15.0	1.7597231681945773	-10.677991561240546
15.0	14.731793162808334	-1.5572571925082808
16.0	-0.6086606720046874	3.2764304419932975
16.0	-1.7040321670549892	-0.38549035852651437
16.0	2.3126928390597006	-2.8909400834667927
17.0	1.5416296645619494	2.166340423052764
17.0	-2.022264550011581	1.424090789750949
17.0	-2.1603184360821586	-0.9333226909918735
17.0	2.640953321531797	-2.6571085218118404
18.0	-5.009822763690304	-16.706933446660663
18.0	-0.7119358230252983	-24.456779628688565
18.0	12.786424143578616	9.007112879174649
18.0	1.566502824933394	15.411506087341886
18.0	-2.7698639695973157	15.232530864333336
18.0	-5.861304412199096	1.5125632444993602
19.0	0.17456377351190677	0.3677115247886341
19.0	-0.5283406913542549	-0.01202334336386567
19.0	0.3537769178423487	-0.35568818142476494
20.0	-3.342496043834706	1.0718707583838059
20.0	1.986990301083889	-1.8221350812213184
20.0	3.5054093128407797	-1.686857051875659
20.0	-2.1499035700899687	2.4371213747131684
21.0	-20.432890724155087	-3.8178523599004106
21.0	8.193436533790727	-5.401316343183692
21.0	17.86823323546954	0.10222527782231702
21.0	11.401161821150204	5.29775862551559
21.0	-17.02994086625534	3.819184799746176
22.0	-5.65295899700007	-5.710840138420019
22.0	4.67130023528595	-3.2270506478338663
22.0	3.8474843891512664	4.44852204307847
22.0	-2.8658256274371503	4.489368743175399
23.0	2.9078026739721934	1.9725616589787405
23.0	-0.7767661823815944	2.0424654053020683
23.0	-2.1310364915905957	-4.015027064280823
24.0	-1.9488158046285824	-6.247479026888585
24.0	4.909670532780375	-3.984014429058308
24.0	13.28548569678802	3.5073953967950775
24.0	-10.065695168210114	11.443652470866391
24.0	-6.180645256729707	-4.719554411714559
25.0	-4.2649504402132985	-1.6487536542077532
25.0	-3.528043130819782	-2.309515757303744
25.0	8.739661855324194	-1.0802079252589463
25.0	2.9701179046412096	3.8449892611272865
25.0	-3.9167861889322975	1.1934880756431578
26.0	2.8932054063281387	-4.234198814243482
26.0	4.594723894791195	-0.9971405166308266
26.0	-7.487929301119333	5.231339330874309
27.0	0.998926135866374	0.21189110634781938
27.0	-0.5328439660302325	0.029377970524979414
27.0	-0.46608216983616046	-0.2412690768727764
28.0	0.07672828841220151	1.204179470871343
28.0	-2.2993539671954992	-2.0249899125312685
28.0	2.222625678783314	0.8208104416599137
29.0	7.874183827072773	-0.5505406774710041
29.0	8.734380246570614	1.5541657961931366
29.0	2.214841945624149	4.839410180951534
29.0	-9.105802887015194	-2.1355738510152564
29.0	-9.717603132252329	-3.7074614486583544
30.0	1.6930889870819417	1.8900884475843183
30.0	-2.0812519727582943	0.6685355399827461
30.0	-1.3706095370362508	-4.152321292355213
30.0	1.7587725227126036	1.5936973047881489
31.0	-3.069843827564046	-1.4918666387292598
31.0	4.390025662831827	-6.824466209377778
31.0	6.470200341640683	-6.846445019360569
31.0	-3.1991199620085764	7.695653794616205
31.0	-4.591262214899873	7.4671240728514015
32.0	3.216182806210271	5.4167816208344295
32.0	-8.64336395762883	1.4128216342158717
32.0	-8.190636815116454	0.09211993617734437
32.0	13.617817966535016	-6.921723191227618
33.0	-5.137665485926951	-10.863638380179125
33.0	0.6832631984281392	-10.595278405577965
33.0	3.0158759361877703	10.626283188628527
33.0	1.4385263513110416	10.832633597128565
34.0	-11.921207544633887	-2.822345005393916
34.0	3.123331387525703	-10.38095348443337
34.0	4.22059738162038	-9.877961697427626
34.0	12.138360013116351	7.5113747526088295
34.0	-7.561081237628544	15.569885434646094
35.0	3.637588092433529	10.317352449183772
35.0	-4.6847774643499935	15.58623088951693
35.0	-1.4309578188972176	-12.118356168660169
35.0	2.478147190813677	-13.78522717004053
36.0	3.6493445263002147	3.5118068407439917
36.0	-5.673499714585206	-2.701054484952191
36.0	-5.005958462159737	-2.5981405523933447
36.0	7.030113650444708	1.7873881966015506
37.0	-0.051076006312030964	0.7385888150006569
37.0	-1.5947618194665318	-0.93316649344467
37.0	1.6458378257785489	0.1945776784440143
38.0	7.486874497246003	2.1920347247686935
38.0	7.765705143232099	6.225429892705746
38.0	-5.049630206775019	1.6100379760579222
38.0	-10.202949433703068	-10.027502593532363
39.0	0.8321125166384614	-1.0972514507532825
39.0	2.96810349199309	3.0727791607858306
39.0	2.772365615572344	6.821338837040043
39.0	-4.500366852211581	-4.226508038221909
39.0	-2.072214771992296	-4.570358508850664
40.0	-0.27605932185386	8.155637435335558
40.0	-6.618657404954797	0.4388480391871823
40.0	-0.6859657309948056	-5.93467024623793
40.0	7.580682457803469	-2.6598152282848173
41.0	-1.7068537724445756	-0.4853752153599807
41.0	-2.2902526476356617	-1.8990123872201112
41.0	3.9971064200802373	2.384387602580092
42.0	12.326670183386637	-4.54503537250762
42.0	-4.3020119084191935	9.166288948945487
42.0	-5.53233855351768	9.297838830864285
42.0	-5.700293225587591	-0.7854176267221608
42.0	0.8658567796391872	-6.541797526567844
42.0	2.342116724498664	-6.591877254012127
43.0	9.098491807434902	3.5101952806269194
43.0	1.7262101533089083	5.60102484638843
43.0	-12.492497491718924	-2.7087228607451523
43.0	-9.108535348926186	-6.1975121747257935
43.0	4.878433855869059	-0.4219585006094821
43.0	5.897897024032204	0.21697340906513335
44.0	2.316169520955467	0.8577449312506393
44.0	-10.400760783667996	2.5774185828708682
44.0	4.051452399428898	-1.8683927957517683
44.0	4.033138863283642	-1.5667707183697293
45.0	-0.04163748710691831	-0.13458419088173718
45.0	0.07359924984496002	0.01415193682500685
45.0	-0.03196176273806373	0.12043225405671226
46.0	2.186718773608166	0.018286881504879924
46.0	0.06040729602512997	2.822119706401626
46.0	-1.4203674426661612	-0.7151635189461791
46.0	-0.8267586269671325	-2.1252430689603203
47.0	4.186001506732017	1.5395427938026882
47.0	-6.244350402472101	3.901006801229298
47.0	2.058348895740085	-5.4405495950319835
48.0	-1.38321518622868	1.7695541526970489
48.0	-3.1649887620097434	-2.6580185027075247
48.0	4.548203948238433	0.8884643500104453
49.0	-1.8038826476513576	1.4062905417250176
49.0	-4.724468063838189	-0.677154159256417
49.0	3.8975237943567755	-1.225255419554372
49.0	2.6308269171327403	0.49611903708577887
50.0	-4.3969641948983975	-3.7934685935147914
50.0	3.212194110475869	-2.5142630478987997
50.0	1.1847700844225362	6.30773164141361
51.0	2.6376917710325434	-6.147066611995659
51.0	2.7920493932643167	2.1238744931635254
51.0	-3.3912404859652545	4.735920350614821
51.0	-2.038500678331597	-0.7127282317826454
52.0	2.682216006089189	0.5821594939211373
52.0	-1.632955192189006	0.8358342270776226
52.0	-1.0492608139001818	-1.4179937209987528
53.0	-0.17102326725372097	-0.0628607433013867
53.0	0.17924117505237883	-0.06238068749859175
53.0	-0.008217907798662298	0.1252414307999632
54.0	-0.4439679008388212	-2.109855663451472
54.0	1.2005755153198563	2.446675785664365
54.0	0.5964741876704378	1.8927518857516001
54.0	-1.353081802151481	-2.229572007964481
55.0	-1.83639865441335	-0.2001697649381272
55.0	-0.9733549769093838	-1.8435739628504282
55.0	2.0006875989769854	0.8048049189560175
55.0	0.8090660323457965	1.2389388088325044
56.0	8.10715887926533	-7.101780534861706
56.0	2.1223728288700987	5.151522699892914
56.0	-5.264903256692892	4.899322607033799
56.0	-4.9646284514425965	-2.949064772064953
57.0	-0.7237479041639788	0.5200325294278921
57.0	0.24066052790537668	-0.2501515716623882
57.0	0.4830873762586301	-0.26988095776549753
58.0	8.319536586115152	4.174475533272811
58.0	10.099178614336171	13.129824023170958
58.0	-9.746738936415625	-7.499978307095491
58.0	-8.67197626403567	-9.804321249348273
59.0	-2.7937499756809014	0.5615470435827186
59.0	1.2964085480106264	-1.9990908815967192
59.0	4.034544375785578	0.6857418528057639
59.0	-2.537202948115284	0.7518019852082537
60.0	10.861070384576816	3.8720744426349274
60.0	5.23084261768443	8.868584148680863
60.0	-11.725180951371561	-4.0443115755851045
60.0	-4.366732050889682	-8.696347015730693
61.0	-1.0105271298258949	-0.9193382720624527
61.0	3.147096703657347	0.9628326788508995
61.0	-2.136569573831452	-0.043494406788446786
62.0	0.36458537124484103	1.4346046309718101
62.0	-0.41658841500784966	-0.4434478709043555
62.0	0.05200304376300816	-0.9911567600674468
63.0	-10.727536842894226	-3.606820515400689
63.0	10.09353967352787	-5.159891920261575
63.0	0.6339971693663837	8.766712435662296
64.0	0.026587122954302034	0.7964275796111985
64.0	-1.7348488526283272	-0.25334632462508766
64.0	-0.5670722684087665	-0.3465926525360099
64.0	2.275333998082781	-0.1964886024501103
65.0	2.584833596924063	1.1457524704852984
65.0	-2.838297294392026	0.7870623772133293
65.0	-3.3937933889545473	-2.046266214449647
65.0	3.6472570864225267	0.11345136675101222
66.0	7.810957635028331	-3.7189000621259076
66.0	7.965157771813454	12.158823903291148
66.0	2.9857113352586384	12.145367187821558
66.0	-10.233412869295899	-8.747758674127061
66.0	-8.528413872804537	-11.837532354859713
67.0	-2.9985538481164933	-0.48363310530015463
67.0	2.438827613099261	-2.667355655041833
67.0	1.8704412279783378	-0.25640167201445274
67.0	-1.3107149929611048	3.407390432356444
68.0	0.8501988805329695	-1.806811302108083
68.0	2.148484686652974	0.335848438312267
68.0	0.6339227918231537	2.8790083137281686
68.0	-3.632606359009085	-1.4080454499323618
69.0	2.202174021766512	2.816582153422287
69.0	-2.4281500442453936	-1.5612246265611909
69.0	0.22597602247887955	-1.2553575268611115
70.0	-1.4356187639263456	-4.69873720215879
70.0	-1.1779614117451362	-5.012916774257064
70.0	2.6549496319789125	-5.367458822793287
70.0	0.5920029596449289	8.032359897715963
70.0	-0.6333724159523848	7.046752901493182
71.0	-0.8719776860415157	3.311811897513801
71.0	-3.403861304897662	-0.26601159332142577
71.0	2.796719888186639	-3.128546466190964
71.0	1.4791191027525308	0.08274616199861304
72.0	-0.15174348090062315	-3.1250334057705116
72.0	2.1739652199024215	7.219129080367038
72.0	-2.022221739001801	-4.094095674596547
73.0	-0.015314433638268374	0.5623723762400963
73.0	-0.2997902003363187	-0.28316061046659724
73.0	0.31510463397458255	-0.27921176577350565
74.0	1.474057526844483	0.3286362275855273
74.0	-0.8791660457335536	1.1988917126598422
74.0	-0.5948914811109284	-1.527527940245373
75.0	-2.0238622289183863	1.3388371594856887
75.0	-3.9696877026122763	0.02259954225583338
75.0	1.6125158451645003	-3.32128696976813
75.0	4.381034086366126	1.9598502680266348
76.0	-5.784034070091491	-0.4807513652631359
76.0	5.524112064180011	-1.556118607255319
76.0	0.2599220059114603	2.0368699725184594
77.0	4.708489934815601	3.8849509054231235
77.0	-3.354003148406545	7.0067558340966665
77.0	-11.013544958308668	-10.488236787908809
77.0	3.585778903650685	-3.392880388234403
77.0	6.073279268248931	2.9894104366234058
78.0	-0.26485689526608797	-2.6696657863027866
78.0	0.8424679368083808	2.2213417361369663
78.0	0.6037302946622591	2.2796258587206015
78.0	-1.1813413362045082	-1.831301808554766
79.0	-4.846532342296542	3.059700677111493
79.0	-2.1343037102151086	-6.316982189119792
79.0	5.110971177159755	-1.434274485156693
79.0	4.882746238810095	-0.4874554322216781
79.0	-3.0128813634582094	5.17901142938666
80.0	5.6795231696126205	4.557114946456359
80.0	4.392527759225421	5.57498096400504
80.0	-6.33950885838327	6.139345447762747
80.0	-6.769090771267871	3.0487355029257412
80.0	-3.5625140582122796	-2.5341065861888903
80.0	-0.7014560286676703	-4.875103244979952
80.0	0.541546986723471	-5.675249107690174
80.0	6.758971800969437	-6.235717922290874
81.0	3.3862715537231662	0.09801555751096427
81.0	-0.8105763783350943	2.6984839899956707
81.0	-4.94500123838009	0.01271682070447746
81.0	2.3693060629920253	-2.8092163682111138
82.0	0.26057296429883625	0.19741749738275147
82.0	-0.7626526164263507	0.235873904221268
82.0	0.061274023871965025	-0.4117980217114316
82.0	0.4408056282555694	-0.021493379892571652
83.0	-7.133754195304839	-0.996093970966916
83.0	4.420871631989872	-8.87342053988153
83.0	9.635927236954924	-5.648016520113894
83.0	1.99715034229731	12.492256686570055
83.0	-8.920195015937255	3.025274344392291
84.0	-4.550261747052691	3.9223056948389594
84.0	-7.976714572592417	-9.424161069477764
84.0	-1.2540306589419459	-8.820758915185406
84.0	6.678448406518758	3.8763351913819823
84.0	7.1025585720682844	10.446279098442199
85.0	-3.4128839799294406	8.8746431646886
85.0	-6.1087009469967155	1.3431007167977371
85.0	1.8319434373268593	-8.391116771536398
85.0	2.9886145963778796	-8.694205675488675
85.0	4.701026893221473	6.867578565538725
86.0	-1.575453921523522	1.6992603730678932
86.0	0.28758254739681793	-2.4027039895526716
86.0	1.287871374126722	0.7034436164848196
87.0	-3.8336068026397045	9.68760722309998
87.0	-3.9224296834754906	9.50390289945896
87.0	-1.2116549495046227	-8.077420092899835
87.0	4.833927586501626	-14.957236189200524
87.0	4.133763849118178	3.843146159541411
88.0	-10.481864737348564	1.2945793833667796
88.0	5.999549727335055	-6.562509845739352
88.0	8.349442839073891	-1.1095944286675412
88.0	-3.867127829060406	6.377524891040122
89.0	3.9086672430761493	-4.470914676125733
89.0	-0.4917852803928591	4.251333352470818
89.0	-1.901495886557249	1.9281190551512473
89.0	-1.5153860761260696	-1.708537731496327
90.0	-0.6589636239548173	2.5953639328811864
90.0	-0.2343348268188519	-0.8253894930202625
90.0	0.8932984507736934	-1.7699744398609385
91.0	0.7166490280180792	2.1860227848013287
91.0	-1.8321236298855075	-0.17892807897708785
91.0	0.1999955279052013	-1.4214734425659274
91.0	0.9154790739622272	-0.5856212632583133
92.0	3.41185141384525	5.287333811715936
92.0	-0.5967269973398965	5.488033420899917
92.0	-2.6267542377142434	-5.320084938819595
92.0	-0.18837017879110404	-5.455282293796234
93.0	8.087964282790464	-2.91240779037761
93.0	-2.276944151742814	4.69714635787157
93.0	-5.811020131047645	-1.784738567493954
94.0	-0.07167333293833877	1.709004121191017
94.0	-0.7965666576702213	1.0048341830158707
94.0	0.8682399906085632	-2.7138383042068814
95.0	2.820522065992955	3.012213569489168
95.0	2.867005241788885	3.26242140661662
95.0	-3.533625107996661	-3.132987801156842
95.0	-2.153902199785184	-3.1416471749489316
96.0	-1.7938234648581899	-1.0966090960725352
96.0	-0.4866788568381658	-1.256882306027732
96.0	1.337804586946557	1.1687210789885676
96.0	0.9426977347498215	1.1847703231116826
97.0	-0.3407563373887063	4.559853640149641
97.0	-0.9736058285734328	-4.789724566416098
97.0	-0.3809795129246217	-5.664567177543921
97.0	1.6953416788867375	5.894438103810404
98.0	-8.77553307670867	3.8491763030725785
98.0	-8.630417453610372	3.125234289557116
98.0	10.136786274133211	-6.171700767180738
98.0	10.286649730925685	-6.092454363446898
98.0	-3.017485474739814	5.289744537997957
99.0	-0.3961198779584585	-0.5888922985798595
99.0	0.3370114927647423	-0.30874588025074307
99.0	0.05910838519370449	0.8976381788306459
100.0	-0.9079954611187632	-0.46751962544332976
100.0	0.8250222249122873	-0.06438006511574541
100.0	0.0829732362064825	0.5318996905590777
101.0	-0.2877046527609742	0.968032981390112
101.0	-1.355366575009894	-1.6268710870609933
101.0	0.9828548548526176	-0.5707895176972624
101.0	0.660216372918235	1.22962762336814
102.0	-3.0384397391608893	-4.7353805530423365
102.0	-2.232241677512791	-5.275817900660667
102.0	4.864186114236032	3.1866907918310172
102.0	3.958179671099547	3.754766762617428
102.0	-3.551684368661918	3.069740899254547
103.0	-3.1804517701795842	5.122041206262536
103.0	-3.574703419992966	4.3151485141839
103.0	1.6182500232213701	-4.014902203165954
103.0	5.136905166951167	-5.422287517280475
104.0	-3.35283523618604	0.1908052147731286
104.0	3.7147156928393072	-0.8675551259156242
104.0	2.5735716037041576	0.37485229177287016
104.0	-2.9354520603574286	0.30189761936960985
105.0	-3.590433595595519	-2.638749840227045
105.0	2.0380023628637365	-2.4016717066489917
105.0	1.5524312327317953	5.040421546876047
106.0	-1.443819925984487	12.068922174234663
106.0	-6.675300035599382	-9.213736382072804
106.0	8.119119961583872	-2.855185792161859
107.0	-6.7269145356468245	-6.2908810677791855
107.0	0.3682962797438167	-11.639339035890305
107.0	4.678363564370206	4.0000457092600215
107.0	1.6802546915327985	13.930174394409475
108.0	2.7970364511035655	-1.1742387020898912
108.0	2.8906399742798046	0.38896498590702583
108.0	-5.6876764253833745	0.7852737161828789
109.0	5.5807339386218935	11.81777036583794
109.0	-5.627899619366162	14.21580064071858
109.0	-14.117955637145165	-12.544314657018857
109.0	-10.884366850569497	-13.51223397840742
109.0	0.14959726138420754	-8.337987367315352
109.0	6.608769586625993	-4.123162848081352
109.0	10.060306483424645	3.7051185027568003
109.0	8.230814837024129	8.779009341509648
110.0	-1.7014284454677655	2.239899125867085
110.0	-0.7957710863510256	-3.823125688733668
110.0	1.1122924070835571	-4.037713224745404
110.0	1.384907124735239	5.620939787611987
111.0	-1.0651740220277632	-3.7540670453992937
111.0	3.5112145756409006	-4.535231028729794
111.0	-1.0048354865961584	4.13712513766244
111.0	-1.4412050670169803	4.152172936466676
112.0	-4.760805816750544	-3.919655686080567
112.0	-2.742833846255934	-3.557731943670524
112.0	6.832531150450477	1.0353153774917365
112.0	3.2828037904202865	3.837557388091951
112.0	-2.611695277864285	2.6045148641673954
113.0	-7.554657900112802	3.221759461638008
113.0	-7.180084764487817	-13.201309106474847
113.0	9.13401829116286	3.2242170613068915
113.0	5.600724373437746	6.755332583529931
114.0	-2.6729942176754817	-0.6127589773101686
114.0	-2.6923481416959882	-7.826990864621791
114.0	5.3653423593714775	8.439749841931974
115.0	-0.7777005316212477	-3.7799028644391672
115.0	3.5197596118616503	0.320808177829798
115.0	1.0576430758928892	3.0945132634013772
115.0	-3.799702156133277	0.36458142320799664
116.0	-0.21606688338035193	3.5167649509070364
116.0	-2.0949322711434277	1.4786966601709057
116.0	1.824250838105926	-8.388623187926324
116.0	0.48674831641785565	3.3931615768483843
117.0	-0.2656218076530801	1.049119521223508
117.0	-0.677995066715698	0.11072266224100989
117.0	0.29959935136465055	-1.3435146551860493
117.0	0.6440175230041278	0.18367247172153842
118.0	2.541988247173432	0.7524504151268976
118.0	-2.834981250940179	0.8370875790284142
118.0	-1.710890248183707	-0.4648915824646312
118.0	2.003883251950482	-1.1246464116906854
119.0	-1.691101436272293	-0.3908662987333924
119.0	1.9169899586818737	-0.8977195708233843
119.0	-0.22588852240957183	1.2885858695567711
120.0	-0.5610809506928865	-2.6768210882401253
120.0	1.483055463563617	-2.600183122061395
120.0	1.8720342994980852	2.9166881709732873
120.0	-0.23588263515821478	2.646716756314711
120.0	-0.7212946830382309	2.2516904223231515
120.0	-1.836831494172381	-2.5380911393096097
121.0	1.0114686917183937	-1.5769472380890173
121.0	0.7747493547567024	0.822387475669007
121.0	-1.2245769532859103	1.538923368090264
121.0	-0.561641093189176	-0.7843636056702415
122.0	-1.5035266086512535	0.53700729995804
122.0	0.19069125605851536	-0.7371432944205446
122.0	1.3128353525927525	0.20013599446249075
123.0	-2.09593454843594	0.5528176513945224
123.0	1.3631027739299457	-0.5214856448860261
123.0	0.7328317745059928	-0.03133200650849318
124.0	-2.6495675474120666	-6.894296699937265
124.0	3.8593993308135293	5.833276132808106
124.0	3.116132331757268	6.086532460059264
124.0	-4.3259641151587145	-5.0255118929300835
125.0	-1.0596508056233196	2.848144968097953
125.0	-5.475244948300321	-6.867365763278938
125.0	4.199150958483576	-4.167159033760458
125.0	2.3357447954400183	8.18637982894141
126.0	-8.551460299553503	-3.8544739733665376
126.0	-9.17606613494317	-8.37333265739196
126.0	7.065680689201697	1.230092499335824
126.0	10.661845745295047	10.997714131422661
127.0	-0.4460239286922233	0.2304874817466452
127.0	-0.17322809805257414	-0.6510690199940034
127.0	0.6192520267447942	0.42058153824735184
128.0	1.0253425201078639	9.724955981723285
128.0	-2.1071558908416645	7.983336453414538
128.0	-8.208328389416113	-1.6938375851884935
128.0	-9.076112714686408	-13.72410622768198
128.0	14.98249316380454	-11.703631932460157
128.0	3.3837613110318085	9.41328331019285
129.0	1.5919448064844857	2.9244415343023933
129.0	-3.6871396256589986	0.06705903099517108
129.0	0.5786456736001695	-1.6524384007824837
129.0	1.516549145574333	-1.3390621645150789
130.0	6.894460202817571	-1.584039794883559
130.0	7.041639931759942	8.196298565725414
130.0	-6.984722339589568	-0.753776340484917
130.0	-6.951377794987961	-5.858482430356934
131.0	5.6561397259407284	2.5830167920104867
131.0	-2.0997570646548374	4.332544656632318
131.0	-3.556382661285912	-6.91556144864279
132.0	1.1638761583927608	-1.1554025194388082
132.0	2.0429218094919452	2.8234613478207113
132.0	-2.7609748779116643	1.7918438183470797
132.0	-0.4458230899730539	-3.4599026467289904
133.0	-3.6082270683853146	-0.5443621243164479
133.0	-1.844528724959644	-1.7513630639457665
133.0	2.8808118048265823	-1.0168190721437904
133.0	1.9353420687932357	1.3790337052642139
133.0	0.6366019197251771	1.9335105551417366
134.0	-0.26481990888231666	0.030489140345352835
134.0	0.03479336338249032	-0.09609596568636795
134.0	0.2300265454998373	0.06560682534103195
135.0	-15.411402037800144	-5.642178590125972
135.0	12.864368558099885	-0.5343545740235072
135.0	14.957773489904914	5.958576338575968
135.0	-12.410740010204657	0.21795682557350768
136.0	1.5040641491876332	1.0337457639402656
136.0	-2.1316702801984806	-0.5762109295238517
136.0	0.6276061310108628	-0.45753483441637427
137.0	-5.964042429386759	12.703295760808059
137.0	1.150460852652105	-14.398439387819728
137.0	8.981546012209591	-11.527146784724204
137.0	-4.167964435474901	13.222290411735925
138.0	-7.305666383149045	4.712077768666103
138.0	3.1284776748504233	-5.881236304515191
138.0	4.177188708298632	1.1691585358490575
139.0	0.6101697128118871	-0.1630004153843164
139.0	-0.35300114491042084	0.4576250463382146
139.0	-0.25716856790147974	-0.29462463095390273
140.0	-2.606076866000329	0.04689313722267252
140.0	1.662635784137592	-1.3638604206850358
140.0	0.943441081862738	1.3169672834623702
141.0	0.014140130624676771	-0.44781526577000375
141.0	0.09161426939061984	0.8274608551026189
141.0	-0.10575440001529185	-0.3796455893326204
142.0	-3.8594870620858153	6.4087866049414695
142.0	-1.9678384363154282	-15.52734912944554
142.0	-1.382684351572159	-15.984125046318688
142.0	3.904938100330634	12.227806025900794
142.0	3.3050717496427753	12.874881544921967
143.0	1.52611393192353	1.256161754615264
143.0	1.449595434930139	1.358317943406731
143.0	-1.6661854811381722	-1.0823030013369253
143.0	-1.3095238857154825	-1.53217669668507
144.0	-13.490921774784553	-12.246770317449622
144.0	16.18068343323886	-6.592400347416523
144.0	16.589586850207066	-5.90642614726082
144.0	-4.82462821840035	14.341874656181467
144.0	-14.454720290261015	10.403722155945491
145.0	2.507472129403129	2.3298180391394134
145.0	2.059899474791549	2.4357516099248917
145.0	-5.0271738024595	-2.9001701903924517
145.0	0.45980219826476754	-1.8653994586718392
146.0	2.670277219271902	0.4805840869540762
146.0	2.229508923938743	1.1800193828793133
146.0	-2.4944100598217935	-0.740651041853132
146.0	-2.4053760833888522	-0.9199524279802416
147.0	0.5233052797287219	-0.062330844137615
147.0	-0.5891439621182042	0.15088853863398566
147.0	0.06583868238948153	-0.08855769449638068
148.0	-6.682464975077983	1.049919490180615
148.0	-1.4197703901531447	-4.683714485860516
148.0	0.12646281221165934	-4.574503337362461
148.0	10.533001441366704	2.832912590070711
148.0	-2.5572288883472147	5.375385742971655
149.0	5.355210306442514	-0.5981933480806311
149.0	-6.815585015095158	5.26831989791629
149.0	-8.285208698186993	5.161031049795155
149.0	4.425338004809999	-4.9356119331476025
149.0	5.3202454020296	-4.895545666483235
150.0	-0.774021051583225	-0.20754712713264029
150.0	0.1429157031944651	-0.4091588615501744
150.0	0.6311053483887564	0.6167059886828157
151.0	-4.331662988971504	-4.311051465875213
151.0	7.528749740145311	-0.4612505764840743
151.0	2.0588837490432175	6.256928150553065
151.0	-5.255970500217022	-1.4846261081937637
152.0	8.67857207573461	2.6117538791533743
152.0	-6.327322815836294	12.105744727929583
152.0	-19.815025949733517	-3.1093682344692652
152.0	8.269693626570753	-11.722418536344609
152.0	9.194083063264454	0.11428816373092263
153.0	0.3127626393770396	0.07985893815162873
153.0	-0.8399832890581653	0.17421875981588456
153.0	0.5272206496811671	-0.25407769796753094
