# Supplementary material
Source: ML conference proceedings conference paper supplement (https://openaccess.thecvf.com/content/CVPR2021/html/Harel_Crossing_Cuts_Polygonal_CVPR_2021_paper.html)
Supplement: Supplementary file 2 [file Harel_Crossing_Cuts_Polygonal_CVPR_2021_supplemental.zip › Dataset/D3/p7/pieces.csv]

piece	x	y
0.0	1.211168479052303	5.615094856059227
0.0	-5.58643104595771	-5.994097382029118
0.0	4.375262566905377	0.3790025259698909
1.0	1.7832515982674855	3.8307831800079994
1.0	1.3146990695631038	3.8773254782899698
1.0	-1.7817978541722803	-2.676593448323001
1.0	-1.3161528136583132	-5.031515209974943
2.0	2.9715919677880422	-10.391400302362305
2.0	3.381562777599344	-10.424012120128078
2.0	5.850136114140915	4.00781816668999
2.0	-5.176131206831612	9.687670772703875
2.0	-7.02715965269665	7.119923483096505
3.0	1.6896241936824685	9.182133899897291
3.0	-5.074532052763384	-3.5869393082192134
3.0	3.3849078590809256	-5.5951945916780765
4.0	5.728069483135556	1.0750410408912288
4.0	2.6329495860876757	4.157464349923204
4.0	-1.5091936797781842	2.613237931398981
4.0	-6.749210580374804	-0.02361268549115885
4.0	-0.10261480907025083	-7.822130636722219
5.0	3.6583719565757145	2.8754651281521006
5.0	-1.2573086194039966	1.9756838128882739
5.0	-1.514748008674858	-1.6618068488472042
5.0	-0.8863153284968596	-3.18934209219317
6.0	-1.5386934588831331	3.0896256037811063
6.0	-2.5933758865301577	3.4345151620204653
6.0	2.726785064144577	-7.015534577831167
6.0	1.405284281268741	0.4913938120295446
7.0	-7.3671246168068825	4.131449131856578
7.0	-9.106228862683956	-1.640372878199016
7.0	-9.846316206747385	-5.871435735370156
7.0	18.78238710457001	-1.702470763474624
7.0	7.537282581668219	5.082830245187213
8.0	1.3480044052019713	4.325667504959296
8.0	-1.7879140158687599	3.4470058626762254
8.0	-4.455744769388424	-0.5317286903514515
8.0	0.7562787941276145	-4.601114661778965
8.0	4.139375585927584	-2.6398300155051344
9.0	7.988351714274178	5.3105815456891765
9.0	-14.80419394638441	6.702721217322212
9.0	-16.047182458416295	5.316134496891851
9.0	0.16913219211674146	-5.4465127322168705
9.0	11.021510048698294	-6.108764600020297
9.0	11.672382449711495	-5.774159927666082
10.0	11.044813883714665	6.758283579327202
10.0	8.501441220386457	8.577109801220104
10.0	-14.723876646238065	-2.2849808799017115
10.0	-4.822378457863055	-13.050412500645587
11.0	1.0824562910586573	-0.4441415938187811
11.0	0.2043849467360595	0.414382092524831
11.0	-1.2868412377947158	0.029759501293930013
12.0	5.627425482851349	-2.4096169256693507
12.0	0.7222305777942415	7.090087408507406
12.0	-3.4044807326271025	4.744668985783061
12.0	-6.1122296996725884	-1.3968576633389804
12.0	3.1670543716540918	-8.028281805282123
13.0	6.20737787241841	1.0514331327007351
13.0	-9.397288665910267	12.503126365716101
13.0	-9.655545853778783	12.344790431445661
13.0	4.489762535749367	-14.871582872439863
13.0	8.355694111521329	-11.027767057422617
14.0	4.143209474149181	-4.473616490805221
14.0	7.376045905595104	7.6319266118820455
14.0	-4.886479817985569	3.1241881353370853
14.0	-6.632775561758718	-6.2824982564139225
15.0	-2.445565329857275	-9.480597687233143
15.0	-0.2089698402957545	-10.474861367535352
15.0	7.447696705095098	3.0141048890937228
15.0	0.4429034516621426	11.243298871740638
15.0	-5.236064986604304	5.698055293934086
16.0	0.379033248097417	6.419444850788004
16.0	-3.636460125547077	-9.59869918595958
16.0	3.257426877449691	3.1792543351715454
17.0	-0.6085800899183054	4.562701012597865
17.0	-3.197611439516231	5.601567781929632
17.0	-1.5681050049998722	-8.255243999212663
17.0	4.4602790111721635	-4.992305869303112
17.0	0.9140175232622381	3.083281073988274
18.0	-11.726609793933388	7.423904515148806
18.0	-0.5521685108163287	-8.339235213720002
18.0	11.997702241789916	-8.317412932148256
18.0	8.079454033641388	0.1805272714756928
18.0	-7.79837797068158	9.052216359243769
19.0	-0.6120115319362882	-5.217972014818062
19.0	5.256569087923285	5.83142038199403
19.0	-4.644557555986999	-0.6134483671759781
20.0	1.4812155347078433	-1.1052899652219386
20.0	-0.5049391564330192	2.1019495426010275
20.0	-0.9762763782748368	-0.996659577379083
21.0	-2.107551634785078	-1.5532866553899813
21.0	1.9927124908565947	-1.2883548446517887
21.0	2.735971763496398	2.904339208473737
21.0	-2.621132619567917	-0.06269770843194977
22.0	1.8643674177590104	-5.203159681734345
22.0	5.864929959249126	7.434317305344692
22.0	-8.951854733160975	3.1651011757847356
22.0	1.222557356152849	-5.396258799395092
23.0	-0.3317589263651849	1.3203934028006645
23.0	0.2603727506273321	-2.8692048081567942
23.0	0.07138617573786371	1.5488114053561417
24.0	4.190261655284213	-17.392628038542338
24.0	6.259584313001696	-15.49503108902229
24.0	14.527695798822872	2.632829423799498
24.0	3.2727904559384946	11.781845435227712
24.0	-11.91626610815273	12.98531687371927
24.0	-16.334066114894604	5.487667394818088
25.0	-6.05500026642724	3.294791880894878
25.0	2.085689002034443	-5.779997004773488
25.0	3.9693112643927977	2.48520512387861
26.0	2.8939388868299614	-1.5123436754297161
26.0	2.4014837613604625	-0.3458378281261335
26.0	-1.9577263629533848	2.4811752211642575
26.0	-3.3376962852370293	-0.6229937176084114
27.0	4.6272346506567335	-0.47059770810843515
27.0	-6.486394099613672	4.938840197343537
27.0	1.859159448956959	-4.468242489235083
28.0	-6.019533962960635	-17.90945351738604
28.0	13.234340238797953	3.82655790965255
28.0	8.513955076269951	12.061952691511555
28.0	5.335867888684146	13.857894684666663
28.0	-14.44354807602584	6.184439339701425
28.0	-6.621081164765607	-18.021391108146133
29.0	7.6010676179436265	-0.7664858545120152
29.0	-1.6692711549791173	9.044898948709978
29.0	-2.8663364717456608	6.640097522849541
29.0	-2.6217279178915778	-6.901205768847287
29.0	-0.44373207332725517	-8.017304848200192
30.0	-4.521440266383148	-1.6734512223483136
30.0	4.56620677855183	0.5896059449876386
30.0	4.298052051347122	1.1538042560543547
30.0	-4.342818563515813	-0.06995897869368517
31.0	5.074478358338103	5.055142615340105
31.0	-4.832185211790609	0.34314567441806587
31.0	-5.256818625849787	-4.483041152563768
31.0	5.014525479302295	-0.9152471371944033
32.0	2.0253516083735494	9.084721848664113
32.0	-14.829380738576747	-3.7759786024209525
32.0	7.299111086271349	-9.248675050654057
32.0	5.504918043931862	3.9399318044108824
33.0	-6.0071940692651244	0.3024961293492081
33.0	6.60700340435098	-7.878668725796213
33.0	7.04363277718023	4.591209567838041
33.0	-7.643442112266079	2.984963028608957
34.0	-1.016773186270861	-7.450796672038116
34.0	11.64490110973495	-4.41643991271733
34.0	14.675517339209444	1.6499542842731536
34.0	1.0441078196606717	8.452975384368102
34.0	-15.188311437868073	3.1372357416513377
34.0	-11.159441644466028	-1.372928825537194
35.0	-0.32347942403600216	0.9811234879054703
35.0	0.06593041796340787	-1.034288991732218
35.0	0.25754900607259257	0.0531655038267336
36.0	1.3328336939559136	0.9763001861330536
36.0	-2.067183656534105	-0.25073877528220023
36.0	0.7343499625781814	-0.7255614108508549
37.0	-1.5572824637307878	-4.749215832608128
37.0	8.434056815315015	-0.7977151099162718
37.0	-3.214126338204922	2.9385664852108366
37.0	-3.6626480133792922	2.6083644573135674
38.0	5.490370104846561	5.515776012849811
38.0	5.4732048985468165	5.853779770694215
38.0	-3.0077597559400866	3.948625113594708
38.0	-4.144851003370529	-7.616438613554505
38.0	-3.8109642440827627	-7.70174228358423
39.0	-1.229260374728568	1.7508135696861364
39.0	-6.4898858149018865	-1.9817534967812898
39.0	2.837462101934426	-2.0726813537755944
39.0	4.88168408769603	2.303621280870739
40.0	-0.40477679022575597	6.703603925723682
40.0	-8.181001407462022	-6.756058714256062
40.0	-1.022579242146164	-4.018240005332999
40.0	4.740583915066592	0.5241199245102584
40.0	4.867773524767374	3.5465748693551347
41.0	2.7859932222003163	-0.8753942132489524
41.0	1.6657740585491843	2.845602922452529
41.0	-4.451767280749518	-1.9702087092035871
42.0	-3.259662127908886	-0.9414431173793687
42.0	1.8233141953046619	-1.5206521171732952
42.0	3.2554353330359316	-0.46490562326004126
42.0	-1.8190874004317164	2.9270008578127165
43.0	-2.2626143782639625	2.884053420619691
43.0	-1.6034411089404754	-1.3968789231726042
43.0	-0.37721088429981675	-3.473964264783056
43.0	4.2432663715042755	1.9867897673359896
44.0	0.5049854353100409	-8.141807307421264
44.0	4.314664719652671	4.8958192099507345
44.0	1.5183086349659316	8.288074270364952
44.0	-6.337958789928635	-5.042086172894474
45.0	-7.675853512493059	0.9037226667313083
45.0	-0.7169331379596016	-6.667205217469483
45.0	7.5521443855912285	-2.1039449994564157
45.0	6.685794278504764	3.9152715168154484
45.0	-5.845152013643299	3.952156033379165
46.0	0.08818997885644535	-0.04075073249055547
46.0	-0.03303507248568329	0.035139322103613334
46.0	-0.05515490637076438	0.005611410386902015
47.0	1.743179005278022	0.5333145147800821
47.0	1.1347389719017207	2.731550504747575
47.0	-2.8779179771797345	-3.2648650195276456
48.0	-0.9978972424517052	1.3764065939496963
48.0	-1.5658662086336228	-0.5861679818773616
48.0	0.7434418477628658	-0.8859108913499902
48.0	1.820321603322462	0.09567227927764119
49.0	5.506991120978083	2.0881002519706064
49.0	-6.488023735848534	3.2443630570004336
49.0	0.981032614870446	-5.332463308971056
50.0	-0.017755692354905483	1.968271491834375
50.0	-1.2058441610053348	0.006619899249680594
50.0	1.223599853360228	-1.9748913910840489
51.0	11.203832271399103	3.4992852501071874
51.0	-14.453260265947184	2.6469745122567065
51.0	-9.291594150518995	-5.784373500818608
51.0	12.541022145067089	-0.36188626154528203
52.0	4.331034786235447	-5.137499517485478
52.0	0.8256096350526284	1.5460310512930673
52.0	-1.3996493750643402	3.3591708176130055
52.0	-3.756995046223736	0.23229764857940505
53.0	-8.144692101161759	8.69149977095798
53.0	3.760447770085671	-13.528237256817572
53.0	5.6046825394375945	-12.692833784149293
53.0	3.3267101296339234	5.5804775294871805
53.0	-4.547148337995408	11.949093740521723
54.0	0.21306570984067452	10.107009074536197
54.0	-3.0121490422520756	-2.6452821289258583
54.0	-2.681864051881674	-3.332463505376969
54.0	5.480947384293076	-4.129263440233367
55.0	8.995347889802085	-4.564197840627189
55.0	10.735539416809878	3.3872150567782424
55.0	-0.9524475867202127	5.743426722904651
55.0	-4.5646878216489934	4.691431815951768
55.0	-8.571038423576656	-1.8269920264738224
55.0	-5.64271347466611	-7.430883728533653
56.0	-6.54114225830025	9.026092836223828
56.0	-2.3792165206879288	-6.850006202014079
56.0	2.484932366524088	-13.420324213535771
56.0	7.558821489870539	-1.352628382616512
56.0	-1.1233950774064443	12.596865961942534
57.0	1.9293823699999604	-0.7319914422800562
57.0	-1.7919942767330532	1.6819528105662374
57.0	-0.1373880932669359	-0.9499613682861604
58.0	-3.9020340558600477	-5.025712747466955
58.0	0.02406044380299832	-5.337621935040817
58.0	3.4489762741677694	-2.184824585829144
58.0	0.4289973378892702	12.548159268336896
59.0	2.538108532948167	6.919165562807696
59.0	-1.4204017640609878	5.536322656278484
59.0	-4.255841436562029	-0.8988466893780755
59.0	-3.814899848285674	-3.4186436761057886
59.0	-1.7413844691325875	-6.357631914262498
59.0	8.69441898509309	-1.7803659393398323
60.0	-5.753779976631927	-0.9129834557966574
60.0	-4.577714892976117	-4.5719462867563285
60.0	8.197210015035319	-8.277370717860906
60.0	4.534783391719531	3.4288254294039504
60.0	1.0658515160512048	5.724309044398665
60.0	-3.4663500531980276	4.609165986611299
61.0	-0.05849942940675801	0.8082589016243747
61.0	-1.5220916746366226	-1.55400796040635
61.0	1.580591104043396	0.7457490587819746
62.0	1.5152114006830508	-0.07302797737914207
62.0	-1.9512795012461974	0.7501576943160801
62.0	0.43606810056314493	-0.6771297169369379
63.0	-6.890929379802636	-17.086568644114934
63.0	13.375782051882535	7.98687354840753
63.0	4.163448039678462	11.617937281448652
63.0	-1.4529974803821255	7.111989861213265
63.0	-9.195303231376236	-9.630232046954516
64.0	0.3938354063734224	0.7594293009745265
64.0	-0.2835195876811434	0.7359504872603362
64.0	-0.6717608205019376	0.5282922151289327
64.0	0.5614450018096571	-2.0236720033637816
65.0	-0.6981987416445508	1.2362577399271306
65.0	-1.0388370160999618	-1.1375833259554629
65.0	1.7370357577444895	-0.09867441397164944
66.0	-6.706438911972728	2.4314788193571237
66.0	-5.160335008945669	0.07484466349769958
66.0	-1.6394753314052914	-2.8074237889862363
66.0	2.535878857510239	-2.1751757330117623
66.0	3.887547413634396	-0.9814225705903312
66.0	7.082822981179101	3.4576986097335776
67.0	1.7442855659055625	-0.6049228427440203
67.0	1.4818239998986027	-0.21170428207105935
67.0	-1.5055575187152443	0.8838206657074585
67.0	-1.720552047088921	-0.067193540892379
68.0	-2.490363777739363	7.957810363965161
68.0	-4.416306386377319	1.6161710934370537
68.0	2.1403321900675922	-6.112268109877402
68.0	2.658587225048381	-5.95370267945035
68.0	3.1537618047585485	-5.448454347832807
68.0	-1.0460110557578375	7.940443679758299
69.0	-0.5201924688548879	0.43384582180375014
69.0	-0.34895982989601076	0.031535425402050815
69.0	0.8691522987508722	-0.46538124720579055
70.0	9.575656390132012	-4.202605184344517
70.0	-1.2002357708799671	5.568456844283382
70.0	-1.3719169760005032	5.664090508333109
70.0	-7.016822547226594	2.218955578787209
70.0	0.013318903975059193	-9.248897747059194
71.0	0.22132706521132117	-2.0534500629347923
71.0	1.0542807352471524	1.9898613337942654
71.0	-1.2756078004584692	0.06358872914054042
72.0	8.237124682760113	7.11304774469253
72.0	-4.743080132250777	11.881171021648319
72.0	-12.900839404886424	7.210700383691304
72.0	-5.5021630249997795	-5.668223167566589
72.0	4.392850677686004	-13.20787044375391
72.0	10.5161072016909	-7.328825538711632
73.0	-3.380178384476559	1.920360411571679
73.0	1.6688163986393558	-2.907039954006944
73.0	1.711361985837209	0.9866795424352501
74.0	-0.021073684659753678	6.684586770332113
74.0	-5.298359263277635	3.8454238225780886
74.0	-3.9343606321502085	-13.104229628133316
74.0	9.253793580087603	2.5742190352231287
75.0	0.7337985214750606	3.278786509114196
75.0	-2.245900636520095	-1.8338734960762262
75.0	1.512102115045034	-1.44491301303799
76.0	4.7599569898998135	-6.892853888273861
76.0	-4.2570905446248535	10.811225608974285
76.0	-3.6827254782488783	3.2890525377167275
76.0	3.179859032973912	-7.20742425841715
77.0	-2.2671296447806326	-2.689584153760574
77.0	1.103641974736206	-3.4439215818038726
77.0	4.926462203458429	5.290542121249466
77.0	-3.7629745334139875	0.8429636143150221
78.0	-3.4255897126951975	4.822566514742238
78.0	-3.362925130606948	3.6955598263230045
78.0	0.6060447885307789	-4.6321052689631905
78.0	6.182470054771365	-3.8860210721020674
79.0	-5.445463933321217	-3.0506805673371993
79.0	5.445816157276212	-1.5464421132689714
79.0	5.490022018931746	-1.3989255650986563
79.0	-2.4477350430680627	3.2259742596127854
79.0	-3.0426391998186766	2.7700739860920374
80.0	8.22108490345305	4.565869931790619
80.0	-11.013597540789144	3.734059501565601
80.0	2.792512637336085	-8.299929433356262
81.0	1.1100096410324842	0.07405093311268007
81.0	1.0552265935066651	1.5169240990069568
81.0	-2.165236234539182	-1.5909750321196092
82.0	1.1930888050558837	-0.09653406578887752
82.0	-0.6626171208693187	0.7193040745928461
82.0	-0.7749734088380098	0.49723741635575647
82.0	0.2445017246514795	-1.1200074251597536
83.0	1.1581452349535253	7.342330546475074
83.0	-14.807227148813219	-0.9128346426802922
83.0	6.639129386667248	-4.7138581826658745
83.0	7.009952527192459	-1.7156377211288842
84.0	-7.4553043275502295	11.027617633723715
84.0	-3.203686092520537	-7.8520055087005804
84.0	2.895864316195619	-7.919976042391038
84.0	7.763126103875141	4.7443639173679095
85.0	-5.7298047079291585	-3.736595965104061
85.0	0.605887080048318	-5.743908163548735
85.0	3.013380100421039	3.762465660616326
85.0	2.110537527459833	5.718038468036466
86.0	2.9785723711679024	4.752215035755128
86.0	-9.360045953336044	-4.57815406279738
86.0	6.381473582168129	-0.1740609729577569
87.0	-0.876968702722013	0.01722994167446701
87.0	-0.31605560176022973	-1.7016144572141407
87.0	1.1930243044822466	1.6843845155396637
88.0	5.955633849457708	4.824558488382603
88.0	-1.7021030322134734	4.062971991053335
88.0	-7.575344898614408	-2.3856574843010057
88.0	3.3218140813701744	-6.501872995134931
89.0	7.842345870197139	0.8639259172271361
89.0	-1.690514381746677	4.34360761230966
89.0	-5.392130417456858	-0.705549390564927
89.0	-0.7597010709935959	-4.501984138971857
90.0	3.9549547192973593	5.4548202445159255
90.0	-1.4753219916078173	4.067006274623161
90.0	-3.7545548761458125	-2.762350973876803
90.0	1.274922148456262	-6.759475545262259
91.0	-0.8806245558343688	-5.623099191757856
91.0	3.7790320902139727	4.758996896308149
91.0	3.406023758333036	5.876224997927434
91.0	-6.304431292712666	-5.012122702477717
92.0	1.652640580041436	4.750816135557485
92.0	-0.5447104986519902	4.588495544672905
92.0	-2.9989401552111694	-0.5770543991939128
92.0	1.891010073821716	-8.762257281036458
93.0	3.409430860244206	-0.12168340641229491
93.0	-0.4459414878249409	3.487486793244725
93.0	-4.800302340633117	2.1258375384034776
93.0	1.83681296821386	-5.49164092523595
94.0	2.554280972046205	5.793563920096344
94.0	-0.947850840308716	4.468688525277461
94.0	-4.0511574765246	-5.181143516097749
94.0	2.44472734478711	-5.081108929276041
95.0	-6.858438896145263	-7.619474300384968
95.0	4.273837268586821	-0.47830559692944696
95.0	2.5846016275584467	8.097779897314416
96.0	-2.4106500355293576	-3.779297998786375
96.0	4.247666276382565	0.7731386398360933
96.0	1.9655959649312351	4.756754201560761
96.0	-3.8026122057844414	-1.7505948426104783
97.0	-0.9127793371907404	2.458043634797853
97.0	-1.9782352650814037	0.4978682720394284
97.0	1.3847123463250315	-1.5689239169570044
97.0	1.5063022559471093	-1.3869879898802968
98.0	-1.8454270680393465	0.3905226352356136
98.0	3.664007240065204	-1.3638154933386726
98.0	-1.8185801720258672	0.9732928581030487
99.0	-4.611451161152789	-2.371277990056872
99.0	7.285395413653346	-4.394642486891165
99.0	12.066559841343652	2.264260540109512
99.0	-7.980089427534733	4.013726907640862
99.0	-6.760414666309474	0.4879330291976607
100.0	-13.684401731774198	5.559072943748233
100.0	-14.743993682655422	2.2805517118607126
100.0	1.375769905709281	-6.069941465692274
100.0	5.889806509606182	-6.227192409198398
100.0	13.527289274076963	-0.39858688450447044
100.0	7.635529725037198	4.856096103786216
101.0	-0.08497603872034154	1.9582639257429384
101.0	-1.898518927887558	-0.23886105003234015
101.0	-1.4695946344407202	-2.5069705198126724
101.0	3.45308960104861	0.7875676441020469
102.0	2.7340153745985125	3.423993175558984
102.0	-3.217179826582934	-0.5966351866726564
102.0	0.48316445198443675	-2.8273579888863307
103.0	-3.043303687806629	-1.8856421556908927
103.0	5.880876569514477	0.36412518215393946
103.0	-2.837572881707806	1.5215169735369527
104.0	-1.814715882550629	0.13219975976985454
104.0	0.4941785517129421	-2.333558483477157
104.0	1.320537330837697	2.2013587237072834
105.0	1.4232780691257618	6.189223608346438
105.0	-3.0931961859143486	-0.2700424170809399
105.0	-0.47061796563612956	-2.9851647867285247
105.0	2.1405360824246817	-2.9340164045369646
106.0	-1.6995034905596462	-16.962805755666718
106.0	9.323771542241793	-4.5309711659948
106.0	4.580343851634011	14.499727865541802
106.0	-0.6312142859270811	16.357772055571086
106.0	-9.726270198389805	7.700332730159499
106.0	-1.8471274189992002	-17.064055729610903
107.0	-0.4562526232297961	2.2835624108979555
107.0	-0.5278742018205047	-1.3133379448915334
107.0	0.9841268250503126	-0.9702244660064168
108.0	-1.6904158840650074	-1.4656265339908312
108.0	4.29620568522674	-0.0400069057953699
108.0	-2.605789801161725	1.5056334397861957
109.0	-1.1025169197871203	1.852937000756722
109.0	-0.5461155190743192	-0.9876097096643182
109.0	1.0451002481870315	-2.7937516810264382
109.0	0.6035321906744042	1.9284243899340208
110.0	-1.916537275928121	-0.7141303784950128
110.0	1.3988395159935427	-1.9095228697108177
110.0	0.5176977599345679	2.6236532482058426
111.0	-11.182031015890853	2.5250960604142314
111.0	-1.3154211745560558	-6.8470145146574986
111.0	4.477791135469381	-2.267315598486127
111.0	8.019661054977586	6.589234052729395
112.0	1.1920672022961125	-8.627212855231331
112.0	4.5620545932295125	9.13112035660428
112.0	-5.754121795525635	-0.5039075013729337
113.0	-0.2757687177296276	0.09996771026365071
113.0	0.282814342024914	-0.3159877060403388
113.0	-0.007045624295298564	0.21601999577668066
114.0	3.8500400386625646	-3.8732361591736737
114.0	1.2070399929378106	1.663586778414576
114.0	-5.057080031600383	2.2096493807591027
115.0	-7.938908618505218	6.06583175714637
115.0	1.5619399426641132	-6.905705136898276
115.0	6.376968675841105	0.839873379751906
116.0	0.42656423811301547	6.146822143867935
116.0	-3.0623243114096685	-0.7461936223524523
116.0	0.1670584252394205	-3.997881033168465
116.0	2.4687016480572295	-1.4027474883470172
117.0	-2.4074266796303734	11.790382928994962
117.0	-12.944904068788011	1.3974773505546878
117.0	-5.977856312279968	-8.164314182201402
117.0	2.8736379596715356	-12.279790072184168
117.0	9.341530905293906	-0.2971640352913951
117.0	9.11501819573294	7.553408010127389
118.0	-3.294280767117553	9.949772706166792
118.0	-8.930438680054596	-3.8202847426262294
118.0	12.224719447172166	-6.12948796354056
119.0	2.6793901627471763	1.5242697934463163
119.0	-1.3562349907411981	0.17334459865633156
119.0	-1.323155172005978	-1.6976143921026476
120.0	6.090890572946352	19.20333135244951
120.0	-11.247727995713316	5.933623701554521
120.0	-15.389507379861369	-9.528821352990912
120.0	-4.202232988794112	-17.875193541682123
120.0	12.628836566216236	-10.062289738670593
120.0	12.119741225206209	12.329349579339596
121.0	-0.1388286005387752	1.2144647918643918
121.0	-0.9727054201687859	-0.649502436141141
121.0	0.29011356380892767	-1.4922435142328907
121.0	0.8214204568986392	0.9272811585096676
122.0	0.27671223281198154	3.261378458744782
122.0	-2.7431067969476803	-1.491102081900703
122.0	2.4663945641356606	-1.77027637684409
123.0	-0.114023467547844	-0.23799433224676425
123.0	0.3678465319051108	0.1829732107938655
123.0	-0.25382306435726554	0.0550211214528975
124.0	-0.26559003207833415	0.16796994101816431
124.0	0.009400447320795785	-0.31119295329651625
124.0	0.25618958475757414	0.14322301227829942
125.0	0.31234938553418723	0.2510528129849643
125.0	-0.23315534393258663	0.07412662464106057
125.0	-0.0791940416016079	-0.3251794376259829
126.0	-0.13368746163259201	-0.06007460253064363
126.0	0.274775173927729	-0.08048715953977319
126.0	-0.14108771229512487	0.14056176207042714
127.0	-4.490377838086477	7.049126449176573
127.0	-5.931076662195567	6.0838236588954375
127.0	2.1774283277516076	-5.528530396694394
127.0	8.244026172530438	-7.604419711377628
128.0	6.276533197446102	5.598687285219093
128.0	-0.5215431071673322	10.083440538445522
128.0	-3.690920293582044	-8.12676337929688
128.0	-2.0640697966967325	-7.555364444367726
129.0	-6.014874369714114	0.9328803583698312
129.0	5.481474548944927	-3.619263656720639
129.0	5.777231758618068	0.43185802513982363
129.0	-5.243831937848854	2.2545252732109797
