# Supplementary material
Source: ML conference proceedings conference paper supplement (https://openaccess.thecvf.com/content/CVPR2021/html/Harel_Crossing_Cuts_Polygonal_CVPR_2021_paper.html)
Supplement: Supplementary file 2 [file Harel_Crossing_Cuts_Polygonal_CVPR_2021_supplemental.zip › Dataset/D3/p8/pieces.csv]

piece	x	y
0.0	1.2975279813147633	-0.7364398128803474
0.0	2.1058669511178105	0.11894363005701412
0.0	-3.403394932432581	0.6174961828233336
1.0	-0.3071919205887345	-0.31139683885267566
1.0	0.15885567273450374	-0.21019371731307396
1.0	0.1483362478542228	0.521590556165777
2.0	6.519943728211921	-7.098729221676534
2.0	1.439748928752565	9.25876442822267
2.0	-2.488245552517733	12.207671728003593
2.0	-7.712003591349851	2.365961657948466
2.0	-0.9297173229215994	-6.979421059783209
2.0	3.170273809824672	-9.75424753271497
3.0	3.565832447815517	4.278178215943715
3.0	-1.1066680267790068	5.73874279340557
3.0	-7.452180406312854	-4.489782332523106
3.0	0.9099903370469242	-7.173830021604126
3.0	4.083025648229425	1.6466913447779705
4.0	-2.244264714441482	-9.665536612386488
4.0	7.612181804185404	0.537841597246207
4.0	4.318431294654056	5.9177506293026125
4.0	-2.5658948493572042	7.786679703475963
4.0	-7.120453535040756	-4.576735317638281
5.0	1.2558736010720304	-3.0441451155789863
5.0	1.945149698410023	2.5671700716500228
5.0	0.38449966794046586	2.7914209759836073
5.0	-3.585522967422547	-2.3144459320546398
6.0	-9.908263750946336	-12.012085788628685
6.0	-3.5237827688725876	-13.26249063298483
6.0	6.62642774864502	-13.449477083958172
6.0	9.323750894037156	13.859820668032814
6.0	6.057628763792372	14.830178910521033
6.0	-8.575760886655585	10.034053927017856
7.0	0.34414121923187846	0.4596461611910733
7.0	-0.3561141351113787	-0.14582362846840102
7.0	0.011972915879499932	-0.313822532722674
8.0	1.3089633800720315	0.9639046488897224
8.0	-0.009443035840128608	1.8536772252687554
8.0	-1.2995203442318992	-2.8175818741584777
9.0	5.653753215829211	-0.9996426386724662
9.0	5.691779567716483	0.0531104231776971
9.0	-5.310568357011103	1.9613972911492823
9.0	-6.034964426534588	-1.0148650756545192
10.0	-7.590785619438025	-7.403302932621253
10.0	15.312745571657631	4.346587933048186
10.0	4.913081642926599	6.3842826483532935
10.0	-4.7260605639729505	3.608981353278467
10.0	-7.908981031173269	-6.9365490020586735
11.0	-0.39352375989102706	9.467964536496133
11.0	-12.912277743768156	1.5452614669880518
11.0	-7.093870883421435	-10.045034280630338
11.0	4.376220415494075	-5.348868848698313
11.0	16.023451971586542	4.380677125844469
12.0	3.5929888075757628	-0.5146899289291254
12.0	-1.6259858475068274	1.903619107943242
12.0	-1.967002960068942	-1.3889291790141196
13.0	-23.815851913395296	-4.345383276175379
13.0	-4.411052398156251	-8.435079827466701
13.0	17.58502751570142	0.6168769783736998
13.0	17.29385779951555	1.357398228034885
13.0	-6.651981003665437	10.806187897233519
14.0	9.675714547808585	1.265731849766158
14.0	-4.508123973134407	5.604777523545569
14.0	-2.659949400150746	-3.3958205580482472
14.0	-2.507641174523415	-3.4746888152634816
15.0	-5.598017390299319	-10.968449138675078
15.0	5.543368996634616	-7.841694727723334
15.0	4.704047520760021	13.542842327363605
15.0	4.192138216484273	13.459878745536024
15.0	-2.7829809711038513	1.1728844641660428
15.0	-6.05855637247573	-9.365461670667273
16.0	1.5388395803477342	5.029673268592223
16.0	0.8427062090309096	4.885902289629774
16.0	-7.936142198167969	-0.8702304685577644
16.0	0.77120823228246	-7.14552878805959
16.0	4.7833881765068655	-1.899816301604643
17.0	-0.06592985921493205	-0.13732153809362532
17.0	0.1943144555081921	0.11667400109321557
17.0	-0.12838459629326004	0.020647537000409742
18.0	-1.3401273217473728	-16.409999957203333
18.0	3.3544313344851373	-17.057558285857933
18.0	0.7843489225057825	19.66575261515464
18.0	-2.7986529352435765	13.801805627906637
19.0	1.9414833147238233	1.3938283959399027
19.0	-2.6335072907219095	-0.6721618849578322
19.0	-1.3507994607523686	-1.9587501108310765
19.0	2.042823436750463	1.2370835998489964
20.0	-2.927066777139652	9.736487790095415
20.0	-2.0701730841642423	-8.473621165133347
20.0	2.6131903131735363	-5.96148205750295
20.0	2.384049548130374	4.6986154325408505
21.0	1.6298289368340708	-2.857765178548574
21.0	0.1257528120025746	1.9043042566338892
21.0	-1.7555817488366654	0.9534609219146926
22.0	1.9333569158582935	9.148857477449052
22.0	-13.189641683701433	-6.54280936338946
22.0	-11.139387974604634	-9.68287567749967
22.0	10.554222846383189	2.109461213112381
22.0	11.841449896064564	4.967366350327701
23.0	-7.296901385641304	-1.6749606871515597
23.0	10.334756238314142	-2.092795007528241
23.0	4.447815905477642	5.001574296909839
23.0	-7.485670758150489	-1.2338186022300266
24.0	-1.460611717092756	3.88384885131973
24.0	-1.0393612552039422	-2.6904888395930766
24.0	2.4999729722966935	-1.193360011726647
25.0	-2.4691250192992547	2.051862369116233
25.0	-2.539780711417951	0.38065289120140344
25.0	3.7837402605316424	-4.168306280202702
25.0	1.2251654701855925	1.7357910198850721
26.0	5.2519663897078805	-9.73300725539208
26.0	6.755652479116825	3.4969167373709427
26.0	2.2742521303076577	7.317604553960114
26.0	-2.578869308151276	8.255545476658611
26.0	-5.489507873243502	-1.4534214436783306
26.0	-6.2134938177375725	-7.883638068919251
27.0	-3.214037182201098	0.6758228203773866
27.0	1.5474355197803045	-1.623083839929355
27.0	1.6666016624207827	0.9472610195519595
28.0	1.466197746451902	3.455452905892989
28.0	-2.2651625940401483	-1.0164132616022354
28.0	0.20404085285109658	-1.3000948897331326
28.0	0.5949239947371252	-1.138944754557585
29.0	1.0031557396275677	-4.104767808464292
29.0	3.7605403049326154	2.2756899098221712
29.0	-1.9800994823305516	6.152146218175012
29.0	-2.7835965622296133	-4.323068319532884
30.0	0.8806542749052586	0.2564972140588313
30.0	-0.09151385829947165	1.1350080006070769
30.0	-0.7891404166057792	-1.3915052146658735
31.0	7.452001701731411	4.273143664058633
31.0	0.3668250634569761	4.238737848158434
31.0	-7.818826765188381	-8.511881512217066
32.0	6.554939852961198	-6.918613799138152
32.0	0.17605365963322384	6.215339271243057
32.0	-6.730993512594426	0.7032745278950823
33.0	-1.0448494159948973	0.12571816621787713
33.0	0.8413525577976252	-0.974068493079746
33.0	0.20349685819727212	0.8483503268618691
34.0	-5.438052945512881	-0.3142094117917007
34.0	-2.855337859498004	-2.4124045495831403
34.0	8.293390805010887	2.726613961374841
35.0	18.161648556158628	-6.821036476538508
35.0	3.2880156832805136	6.299822702915804
35.0	-9.652776122313215	3.5785601069372035
35.0	-11.796888117125926	-3.0573463333144995
36.0	-2.802072538608785	2.138076512677866
36.0	-2.634839817689979	-4.978571761349801
36.0	2.669032112673349	1.0459125791975892
36.0	2.76788024362541	1.794582669474317
37.0	-0.6609921336591041	0.17994498649642052
37.0	-0.7478041982679411	-1.6307313073349896
37.0	1.4087963319270487	1.4507863208385754
38.0	0.3553706379682066	-1.5390712759527336
38.0	0.9965253376778677	1.9743959920646543
38.0	-1.3518959756460736	-0.4353247161119493
39.0	8.628771443082524	10.15115616172736
39.0	-6.719614955978312	-3.972409617593689
39.0	-6.307071646656338	-6.523266026046456
39.0	4.397915159552141	0.34451948191273485
40.0	-0.1674747418582314	4.477478621438538
40.0	-6.569318479881781	-6.918875747449983
40.0	-2.8851014250283584	-6.084476105406433
40.0	9.621894646768368	8.52587323141787
41.0	-0.30399424205659203	0.4273611289000438
41.0	0.35130639206137293	-0.8549161567750545
41.0	-0.047312150004791165	0.42755502787502103
42.0	-20.145767835209952	2.7284529335143874
42.0	0.036780554806695065	-5.137700960511158
42.0	16.962102735209992	-1.3675570842852682
42.0	17.015686235642608	-1.1912475606350545
42.0	-13.868801690449327	4.9680526719171745
43.0	8.888498593368954	-0.452585251947089
43.0	9.0468684772827	3.6748663894525224
43.0	-1.3707480511465717	5.485467070859659
43.0	-8.746060196066868	-3.4200902439365963
43.0	-7.818558823438259	-5.2876579644284885
44.0	-1.8405325643189363	3.9724620172110523
44.0	-4.4760293693265725	1.2999276042716532
44.0	6.316561933645515	-5.272389621482705
45.0	-3.4751504191838585	-14.77601491650345
45.0	2.5263810612017528	-14.640761254961227
45.0	1.521538275468159	8.207882801428482
45.0	1.059263945925685	9.989761529430009
45.0	-1.6320328634117152	11.219131840606202
46.0	-0.6035160799387714	-2.599296824703459
46.0	2.871001942246435	-1.7706273983801708
46.0	3.4652986466662026	3.219048391776815
46.0	-4.129211106383629	2.6776453563973646
46.0	-1.6035734025902393	-1.5267695250905415
47.0	-0.014394259471587123	-4.548828682113701
47.0	4.625099518503677	-5.435327380185334
47.0	-0.5068769990390072	11.065694997897626
47.0	-4.1038282599930955	-1.0815389355985983
48.0	1.0891978884214835	-2.280261673809461
48.0	1.0896260788339696	1.7635498867289543
48.0	-2.178823967255464	0.5167117870805158
49.0	7.496778936456444	7.166027620952918
49.0	-0.787958714729426	5.376331852429365
49.0	-15.69854500370215	-6.809998618043268
49.0	8.989724781975148	-5.732360855339018
50.0	-12.352430226224266	-0.059647763658446706
50.0	3.131095542836292	-22.516099132627502
50.0	10.962461847727361	-3.1535391789481633
50.0	10.493013123682207	10.254418643310608
50.0	-5.500403790299471	8.058548189161636
50.0	-6.733736497722121	7.416319242761932
51.0	-3.8453287301991037	-2.558511321233444
51.0	5.647714497385543	-2.710108617317531
51.0	-1.8023857671864398	5.268619938550975
52.0	-0.30197427424182166	-0.06459802080812108
52.0	0.13394957355735745	-0.08712316838441053
52.0	0.16802470068447142	0.15172118919252817
53.0	-6.199455774470882	4.803362158359464
53.0	1.3520791643799486	-3.91007008997651
53.0	2.6598542763946518	-0.9063241076323567
53.0	2.187522333696253	0.013032039249405214
54.0	2.245492724333029	2.4065725995392087
54.0	0.2795585930738891	3.385750195748459
54.0	-1.5911305073005662	-2.397645802521003
54.0	-0.9339208101063485	-3.394676992766666
55.0	-3.858603832092845	6.036344319253926
55.0	-7.8118685236629535	1.7351869570354685
55.0	-2.694218223275337	-7.1285860702586445
55.0	3.8659023235845047	-5.874958184332984
55.0	7.868671134843276	-1.8667615781649731
55.0	2.630117120603391	7.098774556467267
56.0	-3.3200039025178474	1.9505151208397238
56.0	0.965040881887206	-2.2858740249283294
56.0	1.081957442059351	-2.2178287371090923
56.0	1.273005578571314	2.5531876411976815
57.0	-5.421257440530116	4.619416234827425
57.0	-6.5582049548555466	-5.868676627813668
57.0	5.9182444222505595	-0.09135836169020495
57.0	6.061217973135121	1.3406187546764565
58.0	-0.05980796426216628	-16.313443301098328
58.0	14.0520014464582	-6.213033279578841
58.0	-5.789446737618909	12.739290724003236
58.0	-8.20274674457713	9.787185856673903
59.0	0.044804130749693825	-0.05265262970884841
59.0	0.004630456303175226	0.07055078282776046
59.0	-0.04943458705287581	-0.017898153118909865
60.0	0.5379452937181683	-0.8117349120272351
60.0	0.5813679032282986	2.3318764594048345
60.0	-0.7721903745110034	-0.6459353375378374
60.0	-0.34712282243546	-0.874206209839768
61.0	-8.543351657733037	-2.4716136924842855
61.0	2.066087229639812	-7.392834006656291
61.0	9.691402053873142	1.968526410552923
61.0	-3.2141376257799283	7.895921288587653
62.0	1.5835952326645393	5.3165233688598805
62.0	-4.563781269831787	1.6104784495945321
62.0	-2.844938624882521	-1.2294589694198268
62.0	1.4594651266136762	-4.105738157823679
62.0	4.365659535436043	-1.5918046912108963
63.0	-4.118311897509496	-10.02880768125888
63.0	11.481352479699828	8.161923742257688
63.0	12.735648026752346	15.811519022044864
63.0	-4.169351504355227	8.31298404065207
63.0	-8.146726627074752	-11.10192814794976
63.0	-7.782610477512682	-11.155690975746039
64.0	2.15604706340537	-0.8115600729104961
64.0	1.3927918036785694	0.9602018787492244
64.0	-2.5289235790222113	2.79680450986742
64.0	-1.0199152880617475	-2.9454463157061395
65.0	-0.36934252815395513	0.17984656727072054
65.0	0.1655501101555979	-0.18595309614601008
65.0	0.2037924179983516	0.0061065288752839494
66.0	-5.216379865462099	-3.9540105271893706
66.0	9.403260056037471	-1.9019080752262099
66.0	1.2610023103020103	5.276304420292398
66.0	-5.447882500877381	0.5796141821231844
67.0	0.7459912764123452	1.1168312831630833
67.0	-2.341565407016857	1.0859476999078572
67.0	0.7341893574099121	-1.1292797571864388
67.0	0.8613847731945867	-1.0734992258845089
68.0	-5.672034528351714	15.04465325482866
68.0	-6.1229192182475485	14.482297780681247
68.0	-5.394696030821876	-5.532226370820941
68.0	-1.1476245857063816	-17.46565693573989
68.0	9.309282702705357	-16.319851238198886
68.0	9.027991660422142	9.790783509249792
69.0	0.5909198381024954	5.226337193316423
69.0	-1.4695460204232513	-1.7135687806137425
69.0	0.8786261823207655	-3.5127684127026693
70.0	1.8922984239070053	3.5052890301589383
70.0	-3.314706515602875	-1.4496809557530903
70.0	-0.6792897551560352	-5.381731441669882
70.0	2.101697846851904	3.3261233672640285
71.0	-2.7521019535671467	2.356457506392834
71.0	-1.9253548803798748	0.17637570620759713
71.0	3.0105483451716997	-3.6523941191824223
71.0	2.9264239048277743	-1.8690369030098477
71.0	-1.2595154160524487	2.9885978095918446
72.0	0.1322561478874389	4.968773823999203
72.0	-1.2049561678183562	5.075239696211989
72.0	-1.8494398194564057	0.46444486126966256
72.0	0.07921418299157601	-9.038159993214288
72.0	2.842925656395753	-1.4702983882665945
73.0	3.6210039110661008	5.764516303390162
73.0	-12.198658698276503	1.3764961259001818
73.0	-11.149279784746014	-4.11055790176881
73.0	10.178489368375473	-2.5041102459768894
73.0	9.548445203580917	-0.5263442815446515
74.0	4.410364502555216	-2.8394287813604264
74.0	-0.8289343874443068	2.639405965554662
74.0	-3.5814301151109285	0.20002281580574355
75.0	-7.397315232348286	11.401562683308839
75.0	-10.579120214967729	9.641826282496922
75.0	-9.458241871133131	-2.881156158234016
75.0	10.042921591483902	-14.878993189604667
75.0	10.193161743226023	-13.260161121453212
75.0	7.198593983739231	9.976921503486171
76.0	-1.4245848415088325	-1.0898604968958352
76.0	1.132110884968102	-0.9383301532303501
76.0	2.014085688462691	1.4703407041553722
76.0	-1.7216117319219708	0.5578499459707829
77.0	1.2204707612895407	-1.4096478217742119
77.0	0.2914664467597954	3.4083020316725987
77.0	-1.2576804677868423	-0.015134022335461572
77.0	-0.25425674026249423	-1.9835201875629251
78.0	2.0090991664479887	3.9296185748800245
78.0	-3.438399860325087	3.499328669579963
78.0	-2.326087868571536	-2.6404562184164995
78.0	3.7553885624486485	-4.788491026043485
79.0	2.581799254827405	6.811274652704188
79.0	-5.567778754042547	-3.656558916315058
79.0	-0.18408408596910497	-8.253919548474551
79.0	3.170063585184289	5.099203812085408
80.0	1.4681945275333437	10.79771565899165
80.0	-8.60480759100514	7.85335715043211
80.0	2.1612313168615085	-11.040989852375498
80.0	4.9753817466103	-7.610082957048261
81.0	-0.19030407041303188	5.364084384504498
81.0	-6.460365138923064	1.3438503082872313
81.0	1.585556941745812	-4.936887838946489
81.0	2.09124585509829	-3.655667454723476
81.0	2.97386641249199	1.8846206008782151
82.0	-2.465398567150541	-4.433572353419535
82.0	4.313027214302612	3.7436066193945203
82.0	0.6648264185818857	4.547531320309709
82.0	-2.5124550657339286	-3.857565586284681
83.0	-0.9699624433244597	-1.931315200088425
83.0	1.1099278661589775	-4.485902169248395
83.0	-0.13996542283452706	6.41721736933683
84.0	6.836338604178818	1.987154376824808
84.0	-6.048864794387979	4.68655707428552
84.0	-0.7874738097908387	-6.673711451110327
85.0	7.819743899556439	2.641116524175023
85.0	6.601672099585754	5.768896330534895
85.0	0.5945702804007249	5.639819867802878
85.0	-9.371787616589376	-7.023067287935597
85.0	-5.6441986629535394	-7.0267654345771975
86.0	1.2749635584106782	2.7232969266774507
86.0	-2.674510452412003	1.1252078474198348
86.0	1.3995468940013116	-3.84850477409728
87.0	-0.24117908138236763	0.4284214009372614
87.0	-0.5689713815817664	0.34346904485284635
87.0	0.8101504629641352	-0.7718904457900936
88.0	4.670919434651316	0.6143918170796538
88.0	-7.967611621689109	4.830635919935966
88.0	3.2966921870378045	-5.445027737015637
89.0	6.300203910033572	-5.124761910459553
89.0	3.6868545161312705	12.76176862406614
89.0	-3.667326439897505	6.2091505877899085
89.0	-3.28177793600875	-6.605496799786987
89.0	-3.0379540502585884	-7.24066050160951
90.0	-10.147160374798023	3.017248115934747
90.0	11.099141766903623	-7.5510322365359634
90.0	7.734844368067652	-1.5655583664743873
90.0	-8.68682576017327	6.09934248707558
91.0	0.678336334695131	17.86425209653451
91.0	-12.97771515067614	-2.8224658682648815
91.0	-8.203200812814421	-19.778806940923452
91.0	20.502579628795424	4.737020712653826
92.0	12.951591106990357	3.754772580351366
92.0	-3.5655963704441325	0.5735487035484973
92.0	-11.27090306570125	-3.7889739181904134
92.0	-11.322997789845726	-4.1563728850361255
92.0	13.207906119000711	3.6170255193266954
93.0	4.267340646837967	7.105172134865702
93.0	-11.312486843058213	-10.320413066967998
93.0	7.045146196220256	3.215240932102303
94.0	-1.8189103483755902	3.902400224901351
94.0	0.453286366497509	-2.194926347110279
94.0	1.3656239818781064	-1.7074738777910698
95.0	0.5241265459680498	2.405525728578192
95.0	0.3027655173143824	2.582344434702056
95.0	-1.1219135296516374	-3.048037065553127
95.0	0.29502146636920495	-1.9398330977271498
96.0	-1.6212434744208797	-3.035400850627726
96.0	2.4342661680597493	-2.8466232633271145
96.0	-0.8130226936388913	5.882024113954826
97.0	-0.6856576255972919	-0.26839195673351735
97.0	0.14594060126191982	-0.11556868441107931
97.0	0.5397170243353633	0.3839606411445662
98.0	-4.6034931499259955	-3.755396953132365
98.0	19.38031403132738	-13.31853300485868
98.0	19.864588253990448	-11.827475879310226
98.0	-10.850404540594349	10.134282702318153
98.0	-11.776356168114127	9.605831752626994
98.0	-12.014648426683342	9.161291382356133
99.0	-2.5504277954009544	-2.319340110690468
99.0	-1.1391941744330114	-3.282830452064273
99.0	3.689621969833967	5.6021705627547265
100.0	-3.040483762514276	2.442392123715689
100.0	-1.3363403188796867	-4.328731185062598
100.0	2.6817849764408366	-0.8321961145501642
100.0	1.6950391049531812	2.7185351758970864
101.0	2.0264960600768225	0.39199227890864724
101.0	-3.74848397958954	0.772433581614034
101.0	1.721987919512703	-1.1644258605226803
102.0	-12.351455423557502	-1.0124168582779367
102.0	3.5106377486016496	-3.243874654584194
102.0	4.806534631435286	2.0755085517087273
102.0	4.034283043520535	2.1807829611533927
103.0	-3.679617060401236	-5.848016253637852
103.0	5.510171598625946	-0.7300086970677442
103.0	3.863922950378874	4.039105823533004
103.0	1.6518146156301539	6.28694465787127
103.0	-7.346292104233747	-3.74802553069868
104.0	4.637664222141295	3.8795855943180846
104.0	2.999982038369291	5.266636802897714
104.0	-6.163018973175909	-2.316252881065452
104.0	-3.2572834392049246	-4.855764286950354
104.0	1.782656151870246	-1.9742052292
105.0	2.8619932192763677	4.388243607135422
105.0	-1.7778636123666778	4.671789211100998
105.0	-2.022711833776998	-4.104453788071504
105.0	0.9385822268673119	-4.955579030164922
106.0	9.12748066916298	6.381026158181502
106.0	0.9078478810951267	4.785810708696989
106.0	-10.43208301826583	-0.13510523824122433
106.0	-2.033453792337693	-7.382799383502743
106.0	2.43020826034542	-3.6489322451345236
107.0	2.3015208714350464	-1.9797482610797852
107.0	3.6647728143510188	2.3484998863395616
107.0	-5.96629368578607	-0.3687516252597587
108.0	-9.540201341663881	-4.6980132354509045
108.0	7.3444528367258535	-2.147039893615718
108.0	2.1957485049380314	6.845053129066627
109.0	-3.0796172607685848	-10.242387775894583
109.0	8.289473765480002	-3.631631709854215
109.0	-1.1321300158674372	9.804822788373254
109.0	-4.077726488844013	4.069196697375555
110.0	1.787824130989071	-4.341495123173352
110.0	9.948693926774673	4.975666833212139
110.0	-7.219458951314817	7.3476844351293655
110.0	-4.517059106448929	-7.981856145168158
111.0	-1.6649889754861569	7.957288640174758
111.0	-4.915888049155466	0.7895074999497476
111.0	1.231056279343613	-5.6051883533731495
111.0	5.349820745298033	-3.1416077867513827
112.0	6.48845000854581	-0.9528849786550841
112.0	9.145324053033676	5.854229158892101
112.0	4.568944485039883	7.753641325983958
112.0	-7.542460581797878	-1.587807291700829
112.0	-12.660257964821493	-11.067178214520192
113.0	-0.6556645074281423	-2.854107415933235
113.0	3.402250247992226	-0.19745196373238394
113.0	-2.746585740564098	3.0515593796656217
114.0	3.0762168170103994	1.5618719416636235
114.0	-9.29620822442429	2.3670464872778267
114.0	6.219991407413884	-3.9289184289414387
115.0	-10.252834650794208	-4.774287556330152
115.0	0.9276355208771386	-2.3951061443454496
115.0	5.063530153060699	3.648302616343774
115.0	4.261668976856384	3.5210910843318306
116.0	-10.001696370655855	5.922894726211384
116.0	2.9738249952309372	-11.931120401986687
116.0	7.229028707673419	-5.247816081035643
116.0	-0.20115733224850496	11.256041756810934
117.0	0.22895567340751832	-3.277322348994248
117.0	3.9957289792942206	6.548574919791723
117.0	-4.224684652701728	-3.2712525707974733
118.0	9.901560818301618	-6.08681534809145
118.0	5.695648530072365	2.780821753686805
118.0	-7.333498682872914	4.6279783719101495
118.0	-8.263710665501074	-1.3219847775054738
119.0	-10.71830422740311	-5.259464545252073
119.0	5.515952871700855	-16.634112312509966
119.0	5.202351355702214	21.893576857762024
120.0	-10.824232631748984	-5.840191413758134
120.0	12.025664076447613	1.0630679262832496
120.0	-1.2014314446986325	4.777123487474913
121.0	-5.970417582637011	1.1395850673439234
121.0	2.5694367797544246	-2.4349900378087863
121.0	3.2378952506074095	-0.7065542539896391
121.0	0.16308555227517052	2.001959224454497
