# Supplementary material
Source: ML conference proceedings conference paper supplement (https://openaccess.thecvf.com/content/CVPR2021/html/Harel_Crossing_Cuts_Polygonal_CVPR_2021_paper.html)
Supplement: Supplementary file 2 [file Harel_Crossing_Cuts_Polygonal_CVPR_2021_supplemental.zip › Dataset/D3/p9/pieces.csv]

piece	x	y
0.0	1.0938276123454906	0.770367211308618
0.0	-0.5837440463453059	0.9815609142108935
0.0	-0.5100835660001872	-1.7519281255195271
1.0	1.4497988961566701	6.246178174663008
1.0	-7.793685152853188	7.464422439365726
1.0	-7.705974137087926	-11.601000601281171
1.0	14.049860393784487	-2.109600012747558
2.0	1.2011537496103544	-1.3870432395743302
2.0	-0.23054203969358522	1.7216787556746003
2.0	-0.9706117099167655	-0.33463551610028414
3.0	4.38015889400981	-6.632841409443387
3.0	7.218160142392825	-5.283227403864386
3.0	-1.8057676335531045	5.991038434947798
3.0	-9.792551402849531	5.925030378359974
4.0	0.45343057525660957	1.2489513310922895
4.0	-1.6986801587096183	0.014389300297286578
4.0	1.2452495834529969	-1.263340631389535
5.0	0.0020454586049735157	-1.2359489739933984
5.0	0.5130700186151336	0.8015155595489363
5.0	-0.5151154772201272	0.4344334144444629
6.0	3.2835845887046564	3.0310618968032474
6.0	-7.761823579731592	9.002829233503293
6.0	4.478238991026916	-12.03389113030656
7.0	1.537130040079511	-0.905785471059892
7.0	1.289546559620152	1.5849972588209345
7.0	-2.826676599699657	-0.6792117877610464
8.0	-0.5063734894737149	-2.29600014361312
8.0	2.8525846660255643	-1.752714292185438
8.0	-0.36289559531646476	3.2968158221418475
8.0	-1.9833155812353802	0.7518986136566908
9.0	1.5474061772036984	0.43156974073738097
9.0	-0.37614122843075415	1.2898355544931235
9.0	-1.0508319187887618	-0.5129591421712092
9.0	-0.12043302998420401	-1.2084461530592892
10.0	5.574680578363912	-5.0857592225193935
10.0	-3.7334574140389885	7.140683484200067
10.0	-4.537201393691088	5.806004984013128
10.0	2.695978229366167	-7.860929245693787
11.0	-4.209674277501901	1.6698691517341469
11.0	-5.053958640007639	-4.843671831766734
11.0	6.234141736408832	-5.192256103584528
11.0	4.855433987569285	4.644093696463951
11.0	-1.8259428064685759	3.7219650871531638
12.0	0.2794524327173824	2.2469443251290233
12.0	-3.461440299589025	4.384403136747145
12.0	3.1819878668716424	-6.631347461876169
13.0	1.8219549152238208	-1.3266716248448345
13.0	-0.9268582022073861	1.9104222485560651
13.0	-0.8950967130164206	-0.5837506237112375
14.0	-1.4095008767675208	7.092900617213554
14.0	-1.474846456898482	-13.282374250139652
14.0	4.232363227013715	-0.8711792735694912
14.0	-1.3480158933477193	7.060652906495597
15.0	-3.748771009855168	-0.5941637268039512
15.0	1.063739150980636	-7.339654231478704
15.0	9.985828089438531	-0.1408978804792902
15.0	-7.300796230564009	8.074715838761943
16.0	10.349454339733498	21.046791282196217
16.0	-8.026973626841109	-3.6862643942969955
16.0	-8.63804981364871	-7.3848644530152425
16.0	6.315569100756324	-9.975662434883963
17.0	0.010042318483404422	7.449259745021233
17.0	-7.905991905142278	-10.672233528849105
17.0	7.895949586658872	3.2229737838278663
18.0	-4.183996704858867	-19.7613011119255
18.0	9.98968277991438	11.895050052652886
18.0	1.6806089211016293	14.051264205819416
18.0	-7.486294996157101	-6.185013146546789
19.0	14.925444397646503	8.064656296605225
19.0	13.38540102657913	10.403359475156257
19.0	-18.44757112954155	-3.439855506415271
19.0	-20.886204481148322	-7.905682747557462
19.0	-13.529817339006659	-9.026193335927248
19.0	9.774100181398465	-1.8639860557648134
19.0	14.778647344072366	3.767701873903322
20.0	1.8223904125349484	3.706335015078616
20.0	-0.5042177379167327	5.332872365625846
20.0	-2.2158285172443657	-0.12678315475405488
20.0	0.8976558426261643	-8.912424225950431
21.0	-9.458525633290272	-3.4927885565535743
21.0	13.573849782542199	-3.2787054814170364
21.0	-4.115324149251927	6.771494037970611
22.0	-1.6962390279449546	2.780443245751597
22.0	-0.2162734720350299	-5.224307413644674
22.0	2.3284129724516256	-0.10913676773577008
22.0	-0.4159004724716528	2.553000935628851
23.0	-3.9739284599692795	0.5794677755486246
23.0	-3.3080842935744315	-0.4699226219053647
23.0	-3.1590882291361018	-0.5448108490352872
23.0	5.648056785369347	-2.249566822188575
23.0	4.793044197310477	2.6848325175806114
24.0	2.057665005818972	7.008901860618389
24.0	-11.522552309129951	-10.743332503992663
24.0	-9.840386355933704	-13.661926620906954
24.0	7.582682288491398	4.443362522683654
24.0	7.60677609827796	5.218660844751953
24.0	4.11581527247537	7.7343338968456266
25.0	-6.503460505531565	-6.868602171184621
25.0	1.6988285761045248	-6.3121375865323746
25.0	4.5383375495488645	5.000228969225299
25.0	0.2662943798781625	8.180510788491704
26.0	-0.826537900285002	-0.02342450915157729
26.0	-0.9729992015628728	-0.6056978451337477
26.0	1.799537101847873	0.6291223542853281
27.0	1.9768737284559246	5.507851859856117
27.0	-7.0077529187051635	3.064012905458611
27.0	0.1515275027583054	-5.431606110279624
27.0	0.2246005001524769	-5.442052235213951
27.0	4.654751187338444	2.301793580178804
28.0	-3.9295374568215387	6.847668264475603
28.0	-6.06482827437478	-0.10942098757718932
28.0	-8.924852131072416	-22.856346503196225
28.0	6.7526735314225625	-8.236915707154825
28.0	8.348781466899023	10.846652805367057
28.0	3.8177628639471517	13.508362128085576
29.0	-3.332563095553341	3.303130340110284
29.0	0.49748860838809494	-2.736653362962298
29.0	1.4171533564653562	-2.139148780266607
29.0	1.417921130699879	1.5726718031185773
30.0	-10.025055507812663	7.5779025286032535
30.0	-10.064363415732135	7.568482641838963
30.0	-10.227975766995826	3.105698455372944
30.0	0.035710456485609665	-9.914689738115467
30.0	15.143962571888299	-4.2809638847797356
30.0	15.13772166216669	-4.056430002919969
31.0	8.51425325784042	-12.921933012848044
31.0	16.060193597811676	0.47673506510978614
31.0	-13.265279611612188	15.859355207105006
31.0	-15.938693674385275	11.591548986971587
31.0	4.629526430345358	-15.005706246338326
32.0	5.5244697949996775	3.318962762624248
32.0	-1.1655911993896466	4.367098866174898
32.0	-4.053807828041969	2.347259025767978
32.0	-6.7839481546063585	-7.865934407657541
32.0	6.478877387038279	-2.1673862469095853
33.0	16.370263823400048	-0.8061835891191598
33.0	-17.05180318284208	13.175776752115352
33.0	-18.225494952223993	6.785508843068442
33.0	5.3678286641511335	-9.715213641445986
33.0	13.5392056475149	-9.439888364618643
34.0	10.123397049766805	2.1988164326753354
34.0	-5.7530712093041	12.871601782323449
34.0	-6.15363875227472	12.402620857386117
34.0	-5.132529645286447	-12.62078110265671
34.0	6.915842557098456	-14.852257969728148
35.0	7.791579118052178	-0.43336437343879064
35.0	-2.079227097986352	3.1471383998998794
35.0	-4.039526200648381	-0.6051931001067801
35.0	-1.672825819417451	-2.1085809263543047
36.0	-1.4927131750238698	-2.3114784131227597
36.0	4.435548472061388	3.335303852441829
36.0	-2.9428352970375187	-1.0238254393190613
37.0	-5.751375171538179	5.610660535225515
37.0	-4.720718355871057	-6.005043693614021
37.0	10.47209352740923	0.39438315838852045
38.0	-12.738963942667443	6.725677817944463
38.0	-12.707306859863698	-0.7368516506645624
38.0	-0.9588947331884698	-20.68796340570543
38.0	15.545526754689188	-20.006926702441216
38.0	21.90499358360182	15.665201578568084
38.0	-11.045354802571435	19.040862362298622
39.0	0.9885548651542377	-2.9120482097275575
39.0	1.452847369185069	-2.7334917151174802
39.0	-0.28891976312857137	6.403989193260468
39.0	-2.1524824712107646	-0.7584492684154195
40.0	-4.913839645905547	8.917209849471911
40.0	-5.168728786763	8.941849247661374
40.0	-7.237116424451317	1.406691044866902
40.0	8.504075936840767	-10.436992130047113
40.0	8.815608920279093	-8.828758011953074
41.0	-5.200421187602211	-3.449823145441852
41.0	6.074855933723669	1.6010381371161118
41.0	4.37278182932362	2.1530922042321055
41.0	-5.247216575445099	-0.3043071959063737
42.0	-3.7572614980995085	7.8096613277102085
42.0	-5.225099579796226	6.31052153997874
42.0	1.0695687176470918	-7.747962130975187
42.0	3.019702804707372	-6.622019329539977
42.0	4.893089555541265	0.24979859282622563
43.0	0.9877776301507347	-1.3181247127589892
43.0	-0.6181100826966561	1.1104521359835389
43.0	-0.618907984767326	1.0738656389604226
43.0	0.24924043731324952	-0.8661930621849582
44.0	1.0023317327771546	-1.3538535669106073
44.0	0.34833571893800824	0.7185903849656595
44.0	-1.3506674517151622	0.6352631819449462
45.0	3.9314028367433873	1.2446785537482596
45.0	-3.780326531716422	0.00937265749549232
45.0	-3.644157949066269	-0.5444349356962921
45.0	3.4930816440392864	-0.7096162755474641
46.0	-2.0066579387568035	7.137174035260788
46.0	-4.941439352473843	8.258172919106405
46.0	-5.253231310516899	8.047902317398197
46.0	-10.748893016764391	-7.634690414159229
46.0	10.01589323275311	-13.759314162475665
46.0	12.934328385758857	-2.049244695130508
47.0	2.5479016614013776	-9.636899854358001
47.0	3.8115530518744865	-10.624142663711693
47.0	-1.407931869855287	10.905380035988982
47.0	-4.951522843420566	9.35566248208072
48.0	-2.0743284339013712	-3.329049062453026
48.0	5.524176190961893	-5.837205324456185
48.0	2.431018275230666	2.674567358404624
48.0	-0.6527170802922995	4.30045314138457
48.0	-5.228148951998891	2.1912338871200157
49.0	-0.8097884683138104	0.6396511919897903
49.0	-0.9644688561101734	-0.5270118240109726
49.0	1.7742573244239703	-0.11263936797880936
50.0	3.1636054956788184	0.7814685743512617
50.0	-1.480220341139375	3.165473696277265
50.0	-1.6833851545394394	-3.94694227062852
51.0	7.043185073873895	-2.1611728374088774
51.0	0.4172579988104098	3.7228502271067128
51.0	-4.660548542406181	2.2518546425045742
51.0	-5.141544141627537	0.5934575568763603
51.0	2.3416496113493883	-4.406989589078755
52.0	2.199368736429784	-0.9226411373120029
52.0	3.2509547174519784	0.40572378509295337
52.0	-1.5538722852786502	2.4630285298788275
52.0	-3.896451168603111	-1.9461111776597784
53.0	-3.620181555183337	-6.019736556757822
53.0	4.562567709826234	2.8970889386114695
53.0	3.6843306133117224	4.714415080965063
53.0	-4.626716767954644	-1.5917674628187188
54.0	6.476216710306635	-0.34334754193411343
54.0	-8.382547484838312	3.280827003092762
54.0	-4.2528809414383435	-0.9495114349037551
54.0	6.1592117159700495	-1.987968026254888
55.0	11.275242444683936	29.134839656997663
55.0	11.1112267718933	29.141499007351186
55.0	-6.031573017365784	5.729658712241248
55.0	-10.129112484704507	-14.280736213868066
55.0	-8.49090010313742	-16.81223937999088
55.0	-6.036856468026919	-18.292767465309982
55.0	0.3891483065456376	-12.61278821259796
55.0	7.912824550111734	-2.0074661048232683
56.0	-0.26137348973958635	-0.246906514298407
56.0	0.3785898025912052	0.03116599090579089
56.0	-0.11721631285163045	0.2157405233925997
57.0	1.9390549664232954	2.208742872975032
57.0	-2.6458498460405355	0.6527676461047411
57.0	0.7067948796172703	-2.861510519079763
58.0	1.753299175656648	3.384373627084975
58.0	-2.1092880467794157	2.2381712682600705
58.0	-1.8874851838299456	-6.587048529724166
58.0	2.2434740549527135	0.9645036343791212
59.0	-3.017883445457249	1.395126382350666
59.0	-4.355891651222804	-2.5856549142551
59.0	4.403337357259479	-0.6782125986246734
59.0	2.9704377394205843	1.8687411305291202
60.0	-3.7187760731190105	-17.411398076254347
60.0	7.86554715920578	9.114142227282148
60.0	-4.146771086086769	8.297255848972167
61.0	-0.46154269454069563	-2.639450194952137
61.0	2.5423625286546634	0.16173954879334818
61.0	-2.0808198341139823	2.4777106461587914
62.0	-0.4411909495280475	4.161931772668703
62.0	-2.0909820902402227	3.7202460498845964
62.0	2.532173039768239	-7.882177822553308
63.0	-10.012321515086441	13.795445384623134
63.0	6.168398070625715	-15.632122106056302
63.0	7.264973216959172	-14.358740224169516
63.0	-3.4210497724984394	16.195416945602673
64.0	-0.2472729268161159	-0.11950640486155006
64.0	0.31971582534496074	-0.2600578711536217
64.0	0.21328127569887612	0.2895289160818695
64.0	-0.28572417422771945	0.09003535993331503
65.0	-0.020006782103462406	1.9987264619480665
65.0	-0.24654805802689772	1.8057299574847212
65.0	-0.41297647509742097	-1.4512195080129846
65.0	0.6795313152277697	-2.3532369114198115
66.0	-3.898134413049314	-10.482765972889736
66.0	1.4879578433665825	-8.28416484746879
66.0	1.6723652312522783	8.84111690783288
66.0	0.7378113384304834	9.925813912525667
67.0	-0.04868559137145034	2.8377907773085362
67.0	-4.4903857075512565	-1.9331261133389257
67.0	1.6534378174113527	-1.4415006240302222
67.0	2.8856334815113547	0.5368359600606114
68.0	0.9870802861566805	6.323017356708729
68.0	-2.853804889860692	-5.1052541965358555
68.0	-1.9601619260775796	-5.467423999885226
68.0	3.8268865297815937	4.249660839712349
69.0	15.057264937456925	17.434254865692512
69.0	2.183432796494844	12.91126564805491
69.0	-16.36600234433653	-5.030141008178265
69.0	-9.998096923671127	-10.961595039925884
69.0	9.123401534055855	-14.35378446564327
70.0	4.178176536261738	-1.1197148361543598
70.0	-2.6685810057322135	1.2817378695421267
70.0	-1.5095955305295246	-0.16202303338776688
71.0	0.8802176496110228	-7.747807349855647
71.0	2.2613619419507254	2.5035785350063238
71.0	1.5201874907845923	4.1281538603744465
71.0	-4.661767082346361	1.1160749544748951
72.0	8.010896820040367	-3.7937593077860496
72.0	4.264048899745161	2.2803635728812703
72.0	-8.858182715660398	7.155788197773452
72.0	-5.677905839881305	1.9760538011423456
72.0	2.2611428357561905	-7.618446264010994
73.0	-5.724708993540556	-9.75567511847209
73.0	-4.94976057451643	-13.974705971404049
73.0	6.397379001218101	4.239429779116303
73.0	4.2770905668388846	19.49095131075982
74.0	-12.447702059911542	4.174168326718599
74.0	-4.566244955745705	-2.5276639490206305
74.0	7.409222696326802	-2.6074346309052214
74.0	9.60472431933042	0.9609302532072321
75.0	1.3664971643153827	-2.321189930270467
75.0	2.355865708435637	1.3048528425529358
75.0	-1.783350400179806	2.0735926579259325
75.0	-1.9390124725712128	-1.0572555702083966
76.0	-5.225606578665472	-4.279980458964503
76.0	0.42944897234093726	-2.524625790954727
76.0	3.562310100307663	1.090144982507424
76.0	1.233847506016895	5.714461267411785
77.0	12.960835022446446	-1.8612280839817403
77.0	-4.991660904721895	9.586997968164335
77.0	-16.478200713701675	-0.7269137713225271
77.0	-4.407122023917241	-4.496775675331312
77.0	12.916148619894354	-2.502080437528778
78.0	3.8891344047619976	2.500996322446174
78.0	-2.5747897631864776	2.214355218209352
78.0	-3.503747826890063	-3.0165834788638657
78.0	2.1894031853145255	-1.6987680617916512
79.0	-2.067059700927595	-5.439260656007016
79.0	3.4244381701583295	-0.7456163993512067
79.0	1.95158772558883	4.506440616319718
79.0	1.7151154433294094	4.6448972899435095
79.0	-5.024081638148909	-2.9664608509050323
80.0	0.007965704184685316	0.01439539828763323
80.0	-0.033101466449735	-0.029338608294080123
80.0	0.025135762265027853	0.014943210006452205
81.0	-2.3739184762934524	0.1566615765815751
81.0	0.8073828109545949	-1.8577138454780537
81.0	1.5665356653388274	1.7010522688964889
82.0	-4.194380209771117	-0.20941887328839637
82.0	1.779174455288708	-3.9753154511469866
82.0	5.632329906972894	2.081511732405953
82.0	-3.217124152490494	2.103222592029449
83.0	-5.771192543354731	9.724977616555826
83.0	-8.544072561043953	10.581596572625168
83.0	-10.844049248326568	3.076337440095113
83.0	7.515497492457905	-9.507607086291179
83.0	7.83147571408737	-9.362449627995446
83.0	9.812341146179973	-4.512854914989512
84.0	-15.271082931015595	9.74987205395829
84.0	1.0217403696555136	-9.383009680942001
84.0	4.607520453246231	-7.814053322751963
84.0	9.641822108113844	7.44719094973566
85.0	-0.47021784486032847	10.843487949045407
85.0	-5.331334303080438	-5.852162326027406
85.0	-4.085193670001804	-15.005971505787809
85.0	9.886745817942579	10.01464588276981
86.0	-0.15635881951755756	0.078246825752609
86.0	0.07232310638589605	-0.1350959845431377
86.0	0.0840357131316615	0.05684915879052873
87.0	7.47512951020374	4.494696566769434
87.0	-1.473618646014668	3.5543216787417564
87.0	-7.091501040464065	-5.37925691113519
87.0	1.0899901762749944	-2.669761334375998
88.0	1.1527340955213867	-1.9146240644158496
88.0	0.7138670779931002	2.400162680788761
88.0	-1.8666011735144854	-0.48553861637292506
89.0	-0.4011570055461434	-1.1733839524386103
89.0	1.5939543987755243	0.7531103915564423
89.0	0.09755989468939588	1.150807312235822
89.0	-1.2903572879187697	-0.7305337513536524
90.0	2.797482616396991	-0.925684825597368
90.0	-3.9836386580888927	2.0376391820909587
90.0	1.1861560416919175	-1.111954356493578
91.0	-0.0642091092381597	1.5642359290324417
91.0	-0.5427475782474066	-1.139437313104936
91.0	-0.3164918101137716	-1.997228899036282
91.0	0.9234484975993391	1.572430283108786
92.0	-8.50480485916242	6.23745366726099
92.0	-7.866330416023821	-4.243554465794922
92.0	-2.932762559071939	-11.625778400702924
92.0	10.985805306785831	4.481161263026559
92.0	8.318092527472345	5.150717936210288
93.0	-2.562776471962991	-2.444363338043481
93.0	-0.9071468202989197	-2.684957121058324
93.0	3.469923292261905	5.1293204591018
94.0	-3.2464058492676924	-5.312458485062702
94.0	-0.1508723787755537	-5.53555124157836
94.0	3.3972782280432448	10.848009726641065
95.0	3.023088066580714	-0.36566312331632744
95.0	2.4732038139112706	2.6395816257952522
95.0	0.4508442711693148	4.5977359228592425
95.0	-5.947136151661287	-6.871654425338175
96.0	-8.488983934725319	4.165291291196867
96.0	-7.72832715199153	-15.528810503211506
96.0	3.3302603201547267	-10.599992609328785
96.0	7.310240822426264	10.023914839782908
96.0	5.576809944135837	11.93959698156051
97.0	1.809910684483823	-0.7324519491567958
97.0	-0.1364194433590764	1.2261857803069254
97.0	-1.6734912411247485	-0.49373383115012615
98.0	3.891089024748194	-2.258303221240164
98.0	4.207948676150231	-0.5268453735874921
98.0	-3.3694835362910434	4.887880269755486
98.0	-4.729554164607382	-2.102731674927827
99.0	1.1733270054447742	6.271271210798997
99.0	-3.316386240364389	-2.7733039262221357
99.0	2.1430592349196154	-3.497967284576869
100.0	3.041338604550745	-8.590305378282556
100.0	5.744378719245504	7.283762740097931
100.0	-2.4205389219532547	6.110446022904344
100.0	-6.365178401842979	-4.803903384719745
101.0	-13.303954820456271	8.325414455197093
101.0	2.384698678888319	-14.413723615643464
101.0	10.919256141567953	6.088309160446371
102.0	-4.779966682050057	13.283477005402887
102.0	-3.3684894083418997	-4.727795602515257
102.0	1.2041030812867635	-6.440226682712058
102.0	6.944353009105205	-2.1154547201755434
103.0	5.493326673802758	3.8834047676135994
103.0	-11.307668723979836	-0.6185739502613172
103.0	5.814342050177086	-3.264830817352264
104.0	0.03839807759079692	-0.12098907480933191
104.0	0.08839950893737492	0.05169129218194249
104.0	-0.12679758652812922	0.06929778262739021
105.0	0.45495685655184886	-0.10891282679195041
105.0	0.019885602962900317	1.090053135432654
105.0	-0.47484245951475934	-0.9811403086407136
106.0	-3.341432263754323	-6.213461659155263
106.0	12.19228904880336	-0.5283470477077001
106.0	-8.850856785049032	6.741808706862961
