# Supplementary material
Source: ML conference proceedings conference paper supplement (https://openaccess.thecvf.com/content/CVPR2021/html/Harel_Crossing_Cuts_Polygonal_CVPR_2021_paper.html)
Supplement: Supplementary file 2 [file Harel_Crossing_Cuts_Polygonal_CVPR_2021_supplemental.zip › Dataset/D4/p0/pieces.csv]

piece	x	y
0.0	-0.853253581886615	-0.1234226066273351
0.0	-0.793474388704215	-0.748297411247838
0.0	1.646727970590843	0.8717200178751675
1.0	-2.8481718061132995	1.3813070802004912
1.0	2.2509265530511446	-1.998209116001724
1.0	3.4617271157461795	-2.3221104747035124
1.0	-2.864481862684042	2.9390125105047558
2.0	-0.41704500829349567	0.5840975046491732
2.0	-0.7106093708917289	0.06644329123849992
2.0	1.1276543791852192	-0.6505407958876521
3.0	1.3229185198296585	-0.2925946848135264
3.0	0.6611086328480001	0.39907099602077784
3.0	-0.8726688904235534	0.018656365494474515
3.0	-1.1113582622541345	-0.1251326767017242
4.0	-0.6575450507028653	1.1635821937489503
4.0	-0.6702740816948974	0.61586932599335
4.0	0.5408318574800184	-1.0900419065339468
4.0	0.7869872749177131	-0.6894096132083474
5.0	-2.2911011271844903	-1.4430207785548792
5.0	1.805003839967257	-0.762004704844142
5.0	2.0603338645488725	1.4911700918152955
5.0	-1.574236577331617	0.7138553915837288
6.0	-0.4073736938969759	-0.8759725889123631
6.0	1.0654308810249584	0.19527388648067226
6.0	-0.28190141456424167	0.3921374866387799
6.0	-0.3761557725637523	0.28856121579288396
7.0	0.0792516025390025	-0.01572252854114297
7.0	0.041192980866810655	0.071238453827274
7.0	-0.12044458340581757	-0.05551592528611753
8.0	-4.401351166269512	0.9987498021692593
8.0	-1.857015200922702	-1.9238057777478053
8.0	3.288648729700974	0.4122719983643661
8.0	2.9697176374912244	0.512783977214176
9.0	0.6219239399068538	1.7839664588614224
9.0	-3.8887253261259382	1.9038587667839173
9.0	-3.3970051689649274	-0.8004540681456872
9.0	1.7262902942408653	-2.0510069839733776
9.0	4.937516260943148	-0.8363641735262572
10.0	0.0030298892460085465	0.1334926526784463
10.0	-0.3197819338772994	-0.2107819090948517
10.0	0.31675204463129264	0.07728925641640527
11.0	-2.0479460619759067	0.004898667323131126
11.0	1.989316731209083	-0.6080193155423946
11.0	2.013461151633065	-0.550050651148942
11.0	-1.9548318208662525	1.1531712993681773
12.0	-0.37822583277398986	0.33532744342473203
12.0	-0.20919479563441953	-0.8726483865506132
12.0	0.587420628408451	0.5373209431258982
13.0	-0.07950451404043603	1.7480666017768665
13.0	-0.5878866947301903	-0.13537508952031885
13.0	-0.6155555398640141	-0.9177947150909617
13.0	1.2829467486346695	-0.6948967971655886
14.0	3.966652513248903	-8.006366468911786
14.0	4.029865154491559	-7.908562650551813
14.0	-1.3676556226975132	8.605636677995927
14.0	-6.628862045042948	7.309292441467672
15.0	6.936985113951267	0.8173553514785918
15.0	0.03678480151681727	2.166925589734621
15.0	-6.97376991546808	-2.98428094121321
16.0	2.2868901347457804	-5.524307584615722
16.0	10.483939593578741	-3.2525592018470286
16.0	7.056002811511264	7.463543601755624
16.0	-0.4190796630955266	8.454949426715453
16.0	-7.389640189924891	-1.305801381556026
16.0	-6.942500984968052	-2.004463531109234
16.0	-5.0756117018473335	-3.8313613293430757
17.0	0.1364207002360578	2.0237024179461325
17.0	-0.13200713901148378	2.0782497965971016
17.0	-1.273812804237981	-0.7305087997335836
17.0	1.2693992430134071	-3.3714434148096575
18.0	15.755050156554644	5.67881386441413
18.0	15.80106927831741	5.819682836999672
18.0	4.151168900767903	14.970825440163036
18.0	-8.653670638883606	-1.6674864300417016
18.0	-9.90764992758234	-8.137016253198517
18.0	-9.79283206485029	-8.257436686901785
18.0	-7.353135704323689	-8.407382771434872
19.0	0.689606263993167	0.27576768485444564
19.0	0.7157599998702775	0.35231635642630243
19.0	-0.5311493640099705	0.3142429874824689
19.0	-0.8742168998534494	-0.9423270287632028
20.0	0.12201018206753601	-1.6880175249686296
20.0	0.5393432470802924	1.6069585379809994
20.0	0.2500598716828939	1.899505766019059
20.0	-0.9114133008307437	-1.818446779031436
21.0	0.6047954452287694	2.1800353626955977
21.0	-1.3362586557517069	-1.0796250744212335
21.0	0.7314632105229281	-1.1004102882743227
22.0	0.21387943040115195	0.26097236778891736
22.0	-0.08114924522992029	-0.0686078986337065
22.0	-0.1327301851712426	-0.19236446915521996
23.0	-9.130701351890872	-2.0183382771461114
23.0	-3.8533579435164165	-3.4017436741821596
23.0	11.841566976537594	-0.07151525784424269
23.0	10.465646040740793	1.0419653092561327
23.0	-1.8169325078593164	2.6421916698051606
23.0	-7.506221214011772	1.807440230111179
24.0	-0.026353475103993128	-0.32212378697821553
24.0	0.43683651141699636	0.21033311658002363
24.0	-0.41048303631297667	0.11179067039818183
25.0	-2.269336678292336	0.0725187203979051
25.0	-2.3801031524946126	-0.88596964003639
25.0	1.242159505774565	-0.8305093886992594
25.0	1.9942608156359354	0.32017340411571504
25.0	1.4130195093764883	1.323786904222013
26.0	-2.6416200261806444	2.5202105957442917
26.0	-6.686655571457006	-10.273445500238505
26.0	3.7611641469873525	0.8392570758950827
26.0	3.719477202495679	1.2349171435827013
26.0	1.847634248154626	5.679060685016476
27.0	6.392012303227889	3.7349742518030355
27.0	-3.757713050215967	-0.22011880763283986
27.0	-6.723637955117424	-3.4185628289191934
27.0	-2.182285261866296	-3.1501197424948657
27.0	6.271623963971786	3.053827127243873
28.0	13.104602083389649	4.406853417657341
28.0	-8.59795165455507	1.8749042786667747
28.0	-9.126275436224052	0.03317519609737087
28.0	4.61962500738948	-6.314932892421474
29.0	2.7840032176213305	-1.314795324002953
29.0	4.859635905164589	2.7158646631237495
29.0	-2.9054179405857785	0.6808254548284348
29.0	-2.784324750422143	0.3205231051753948
29.0	-2.203744294501576	-0.7111826668868312
29.0	0.24984786272359524	-1.6912352322378366
30.0	-1.07643741155599	2.416602501816116
30.0	-4.307630841937587	2.181177121104409
30.0	-4.730884517414667	1.965784828010235
30.0	4.811032691685814	-3.576222867794444
30.0	5.303920079222434	-2.9873415831363106
31.0	-1.3068485274161554	-0.6017056013288387
31.0	0.05104146112633661	-0.763001750730008
31.0	1.2558070662898106	1.3647073520588524
32.0	-6.0616116975383445	-1.2470312247769793
32.0	-5.767531285869185	-1.9788705742824366
32.0	2.297243633289941	-1.272318703120495
32.0	3.5368921699940015	-0.8876688354834446
32.0	5.073676342158615	1.4061136123222742
32.0	0.9213308379648844	3.979775725341153
33.0	0.763544808060859	-0.3230330295594763
33.0	-0.13668126697464145	0.5870628518523557
33.0	-0.8440659200110671	0.3580121482641683
33.0	0.2172023789248495	-0.6220419705570477
34.0	-0.3313967640134772	-0.2515906581142567
34.0	0.3346866864898032	0.03002667829955557
34.0	-0.0032899224763276416	0.2215639798146942
35.0	0.6478495377738759	1.3243537439811606
35.0	-0.5586221647499294	-0.3807786153195285
35.0	-0.6811119527799083	-1.230451687126845
35.0	0.5918845797560067	0.286876558465248
36.0	0.08128450781507679	-0.6871154103372731
36.0	0.588984790900215	0.9569220444754483
36.0	-0.6702692987152947	-0.26980663413816874
37.0	0.006461655833058219	0.16137470975235618
37.0	-0.08815690622791732	-0.23706991548055098
37.0	0.08169525039483845	0.07569520572822928
38.0	0.9370777447696268	-1.4708644112750897
38.0	1.0138744889703932	-0.17414952529983016
38.0	0.2739532441939984	1.3912561326236033
38.0	-0.9770512059050542	1.0978910005118232
38.0	-1.4178401381961372	0.3359865780430998
38.0	0.16998586616715994	-1.180119774603601
39.0	2.370639560433126	2.215978977105198
39.0	-3.7833828180897195	3.968504732445973
39.0	0.3604398538269574	-3.2924791280084458
39.0	1.0523034038296288	-2.892004581542728
40.0	0.03968544591813723	-0.2348763555409301
40.0	0.13895761711062043	-0.14083829341349402
40.0	0.3583245655636598	0.6817447526978951
40.0	-0.5369676285924408	-0.30603010374348727
41.0	2.8794440961115844	-3.5848635789558045
41.0	-1.393214122328404	4.2564450119168935
41.0	-1.903989513440714	1.5954807561122626
41.0	0.4177595396575467	-2.2670621890733584
42.0	-3.113063665609741	-0.8001466266965392
42.0	5.01281471574193	-0.9665110258545911
42.0	-1.899751050132198	1.7666576525511253
43.0	-6.163637095721786	1.3082114861817338
43.0	-2.7814887112736635	-3.2223736514031414
43.0	5.7528583815337635	-2.6392128808174866
43.0	4.050683996836379	1.2943851157709443
43.0	-0.8584165713746402	3.2589899302679988
44.0	-0.44605918884231216	2.1084970314337133
44.0	-0.9652019686287863	0.9035675585744251
44.0	0.6218765995839277	-2.4041018597583594
44.0	0.9331777094084837	-2.55007278393081
44.0	-0.14379315152134242	1.9421100536809826
45.0	-2.9049887021406606	0.6698552957263295
45.0	-0.16461926197300258	-3.584663721922649
45.0	2.0735508741991486	-2.7322160727697926
45.0	1.8653945995887231	2.540798190446379
45.0	-0.8693375096742199	3.106226308519736
46.0	0.35629223369499324	3.461277070305952
46.0	-1.2782038375533475	-3.4637634330173515
46.0	-1.3025495941156031	-3.6961733390594107
46.0	2.22446119797397	3.698659701770825
47.0	-0.6345872421921729	2.058971768254833
47.0	-3.937498300650113	-0.6825671990442467
47.0	1.3664579167421627	-1.8473089997567906
47.0	3.205627626100121	0.4709044305461759
48.0	0.22918459747484435	-0.25662017928571396
48.0	2.0828205776186888	0.31722218245244804
48.0	-1.2464614898761959	0.18650537606443937
48.0	-1.0655436852173725	-0.2471073792311543
49.0	-0.6001859586818485	-1.0917107175640681
49.0	-0.4506875604629707	-1.2405004976950098
49.0	2.585672532256194	0.6013752007670864
49.0	-0.5032842423938186	1.509042626949101
49.0	-1.031514770717549	0.22179338754292519
50.0	-0.7389760479322312	0.20356408897876097
50.0	0.9996901204561819	-1.1212554581973768
50.0	-0.2607140725239302	0.9176913692186097
51.0	-0.9178379662411236	1.2334794234205628
51.0	-1.8866727799568856	0.8820255419352628
51.0	0.8767880347271718	-1.8533086475155975
51.0	1.9277227114708373	-0.26219631784019864
52.0	5.246213659330217	-1.2499078652925395
52.0	5.136030930352836	5.026384725289646
52.0	2.2926887417606454	6.402995712172313
52.0	-5.241420452117187	3.077795358826127
52.0	-7.228564786477845	0.8263044051366765
52.0	-2.9747433030634105	-5.813640931020755
52.0	2.769795210214765	-8.269931405111473
53.0	1.6740921681877132	-0.8836421119060475
53.0	1.4721540462952825	-0.09137184408666103
53.0	-1.5565196119025637	0.5194021770259292
53.0	-1.5897266025804304	0.4556117789667951
54.0	8.097246134921322	-7.691086178611038
54.0	-1.0611248212073636	4.762257016458915
54.0	-3.8883343579232954	5.61882600131705
54.0	-5.5897980971241195	4.630676537504289
54.0	2.4420111413334626	-7.320673376669224
55.0	1.3890914662922875	-0.2069809904057586
55.0	-0.22078391793670116	0.9711316370463492
55.0	-1.1683075483555978	-0.7641506466405822
56.0	0.2929321427133077	-0.6544042107799916
56.0	0.5252352602381298	0.17406213311375288
56.0	-0.27064818379453537	0.8468393661418213
56.0	-0.5475192191569022	-0.36649728847558266
57.0	4.8261131699812845	3.8911344043786773
57.0	-9.849441691140193	4.450732285124166
57.0	-9.834220016654696	2.060903266626869
57.0	7.239536734152994	-5.394982947676258
57.0	7.618011803660583	-5.007787008453446
58.0	0.7732006881144474	0.2253310854436459
58.0	-0.7130914635996779	0.5123674369937994
58.0	-0.7130127053404236	0.348553756367072
58.0	0.6529034808256541	-1.0862522788045172
59.0	0.054498806514901556	0.2043614511242984
59.0	-0.12521078929506552	-0.04653474335972381
59.0	0.0707119827801798	-0.15782670776457555
60.0	0.4348878314930513	-0.4415242133738119
60.0	0.5801661238124518	-0.26479938628035643
60.0	-0.25376217208034135	0.5577307244510928
60.0	-0.43464828762987306	0.5033058248289712
60.0	-0.32664349559530254	-0.35471294962589917
61.0	0.987896500034702	3.337197112920971
61.0	-2.805092311587612	2.4710570454647764
61.0	-1.2274119305543802	-1.4539136559789256
61.0	1.2478502330391525	-2.333629169099004
61.0	1.7967575090681458	-2.0207113333077995
62.0	1.5471571506394524	-1.4190463906355688
62.0	-0.07934563830719896	2.365411947384593
62.0	-0.7403622483050761	0.6217963579919997
62.0	-0.7274492640272272	-1.5681619147410122
63.0	-0.934062053354755	2.6203801755817415
63.0	-1.5329720027653535	-2.407565685899915
63.0	1.8441355066053444	-2.4545328163906106
63.0	0.6228985495147781	2.2417183267087806
64.0	-0.22100080793025215	1.0107137672296016
64.0	-0.07908141979779762	-0.7769517926993241
64.0	0.019631742987383415	-0.8304653624124824
64.0	0.2804504847406966	0.5967033878821784
65.0	1.681349267089096	-2.004400652082577
65.0	2.4896575380570742	-0.4296749771542104
65.0	1.2512134947932931	2.9008263763543636
65.0	-2.518738803253015	0.34608849851777207
65.0	-2.9034814966865294	-0.8128392456353181
66.0	-5.4931375414014605	-4.098598143764974
66.0	1.6375193140207258	-2.640651882495779
66.0	7.77744009787064	1.4257715753999123
66.0	1.5393423800751596	8.764606366921637
66.0	-5.4611642505650595	-3.4511279160607806
67.0	0.15095004934868417	0.6047404625150461
67.0	-1.4694688382710688	-0.6549573855262334
67.0	0.10567749952685654	-0.6238986753030655
67.0	1.2128412893955505	0.6741155983142527
68.0	0.30717932431564227	13.914525478534637
68.0	-0.06441992358376421	14.378417058049399
68.0	-1.2890822435007239	-12.655793314815194
68.0	-1.1267334092444306	-12.44492149429153
68.0	2.1730562520132892	-3.19222772747733
69.0	1.1470062714536906	-6.673118339852236
69.0	2.0155398895844217	1.63025239561599
69.0	0.4987223336636509	3.7377971960770777
69.0	-3.6612684947017615	1.3050687481591647
70.0	0.8240607928219527	1.1004649076021547
70.0	-0.836523976224239	0.01677042152040681
70.0	0.012463183402295512	-1.1172353291225507
71.0	0.3171134134895367	0.3286202724607797
71.0	-0.0189983023371061	0.823435218303348
71.0	-0.29811511115245676	-1.1520554907641614
72.0	3.9900782265327797	5.274447293550463
72.0	-2.552053842838033	1.7434302318938715
72.0	-3.102729995486443	1.262251837149097
72.0	-2.9953964624996496	-5.6836728443443345
72.0	-1.888747443455571	-5.663875525892068
72.0	2.0410228213323136	-1.9414241180456433
72.0	4.507826696414561	5.008843125688617
73.0	-0.7030254817571334	-2.8041281458458807
73.0	0.10367303514518321	-2.586133121690042
73.0	1.549568108925022	1.9662748432481079
73.0	-0.11326251824031977	2.344592986258693
73.0	-0.8369531440728062	1.079393438029105
74.0	-0.45006516312564276	0.21350976913252617
74.0	0.2105012025172276	-0.1422709867899928
74.0	0.23956396060845334	-0.071238782342531
75.0	7.66481614410821	-4.976760164914058
75.0	0.5015345288256152	3.2268036285221875
75.0	-8.166350672933813	1.7499565363918435
76.0	-0.9375889485864405	6.2740534435696835
76.0	-1.340062173615161	6.523112505409639
76.0	-4.8985862704261995	6.745142296077454
76.0	-4.964679768590071	-4.997920630663384
76.0	-1.2178911878746284	-7.803457202762175
76.0	7.250226383645107	-5.842489750920022
76.0	6.108581965447448	-0.8984406607111851
77.0	-2.2614956469029726	1.4026011935348188
77.0	0.9085670274582698	-2.8317879875832617
77.0	3.399270945235267	-1.5213157007568825
77.0	-2.0463423257905218	2.950502494805326
78.0	-1.583610574502659	-0.9591287879903422
78.0	5.763721209330095	-0.22083227502319625
78.0	-4.180110634827439	1.17996106301354
79.0	-0.9879234572227397	1.1361884854681399
79.0	0.09015988325992928	-0.48164020425858145
79.0	0.8977635739627956	-0.6545482812095617
80.0	-1.7148033388370207	-0.03502150518365187
80.0	-1.103334477826557	-0.8742943565451217
80.0	1.1095004866031901	-0.419954316288778
80.0	1.7086373300603879	1.3292701780175515
81.0	2.6347334597892647	1.5127759095209943
81.0	-2.231607018208897	-0.749314884635763
81.0	-0.4031264415803757	-0.7634610248852434
82.0	-0.7213726959741686	-0.39220539423973794
82.0	0.49348922858777683	0.05284846295130552
82.0	0.22788346738640028	0.3393569312884211
83.0	1.7251917951353408	-1.3848827421669783
83.0	0.4529838063675642	1.6788780900957678
83.0	-2.1781756015029052	-0.29399534792878956
84.0	0.11329018048289036	0.2646513062646855
84.0	-0.135425206350673	0.5081654550566901
84.0	0.022135025867780347	-0.7728167613213728
85.0	-0.6655713536168423	1.5932354829188073
85.0	-1.7951754738659138	-2.794856846935408
85.0	-0.6144731634498626	-2.3369123461019705
85.0	3.075219990932646	3.5385337101185637
86.0	-7.839737140111621	1.8657428301280707
86.0	-0.3056551035619359	-2.943154258337452
86.0	8.263574686004596	-5.321537912824328
86.0	7.277380616417125	0.015268514723960663
86.0	0.26945642972165507	3.660764773605722
86.0	-7.665019488469819	2.722916052704027
87.0	0.011452787737911177	-3.903362696422485
87.0	4.107914804413719	-6.349149608053807
87.0	2.9561068242214583	5.336797804253253
87.0	-7.075474416373128	4.9157145002230225
88.0	-0.9463152313152934	-0.7022826090444464
88.0	1.810482395858779	-0.8995398468884791
88.0	-0.864167164543485	1.60182245593294
89.0	-2.803408575365043	-1.11220916194591
89.0	2.507285704827303	-0.13934402756775968
89.0	0.2961228705377278	1.2515531895136773
90.0	4.717612659987724	5.3493378459310055
90.0	-7.180419130893354	-0.4583464102887159
90.0	-6.1910421104875155	-9.834696178679792
90.0	3.8053644075033546	-0.33249197920413825
90.0	4.84848417388979	5.276196722241619
91.0	-0.5053261282654453	1.3066651046554087
91.0	-1.057575244433247	-0.4539201041750512
91.0	-0.12879720370363726	-1.3680139670713447
91.0	1.0213373167458402	-1.0223101650423367
91.0	0.9191628340183616	0.05816475643350589
91.0	-0.24880157436193245	1.4794143751998787
92.0	-0.8412882834231544	0.4054050717466697
92.0	0.12203674032645011	-0.8675943232445156
92.0	0.6490426449197729	-0.5819750130499285
92.0	0.07020889817693585	1.0441642645477809
93.0	0.194977426418136	-0.35764592698425357
93.0	0.3215462248599465	-0.3163323489561212
93.0	0.15198846176027198	0.6307327045650861
93.0	-0.6685121130383544	0.043245571375288706
94.0	-1.8386333900010958	4.545548874270032
94.0	-0.6396596259162656	-3.1167426932071027
94.0	2.478293015917359	-1.4288061810629276
95.0	2.885077313162689	8.201292372592757
95.0	-2.4577545784824792	-1.338520446524819
95.0	-4.228549187762348	-9.506352784837741
95.0	-3.087115847842596	-9.672106877206339
95.0	3.867197924291465	4.082424281750109
95.0	3.0211443766332855	8.23326345422601
96.0	3.484072913366023	0.2639898303309206
96.0	0.44757357052707464	1.4875800139358235
96.0	-2.1237332283828505	-0.5556607231374847
96.0	-1.807913255510245	-1.1959091211292565
97.0	0.3710138814734955	-0.21519128006007332
97.0	0.004402240204188149	0.5770636625425789
97.0	-0.3754161216776702	-0.36187238248251397
98.0	0.5049979480454418	1.7380166519027604
98.0	-0.6240176863676857	2.393678614249442
98.0	-1.789484165222595	-2.5498166064283705
98.0	1.908503903544828	-1.581878659723805
99.0	4.641854752587942	-2.297816521778502
99.0	-2.5224676630050564	2.560912653496713
99.0	-2.8914249665632155	1.3638943608824765
99.0	0.7720378769803321	-1.6269904926007013
100.0	-10.044380427840156	1.5375847088618717
100.0	-3.066225367492485	-3.0401397817636364
100.0	7.947176106657302	-2.310912753407233
100.0	5.16342968867534	3.8134678263089876
101.0	-1.3776855472885368	-0.4132765108082799
101.0	-2.0101584836435546	-2.4123555318562593
101.0	2.559253431690373	-1.4720488978889839
101.0	0.8285905992417194	4.297680940553527
102.0	-2.9732620778802423	2.1762014833605723
102.0	-4.021263843204345	-1.7170892661344659
102.0	3.8293846620234264	-0.8249394553105466
102.0	3.1651412590611603	0.36582723808445017
103.0	-0.3354731664971354	12.4595391746674
103.0	-5.557740440545074	-3.499602097756965
103.0	-4.3848812452359756	-5.612162438465007
103.0	-1.2028984521547879	-6.0229081709920465
103.0	11.480993304432952	2.6751335325466403
104.0	1.2094283787258762	-1.1580356780745829
104.0	2.3206380351022107	3.215495511040565
104.0	-1.7664732106792789	-1.024549470395724
104.0	-1.7635932031487784	-1.032910362570256
105.0	2.038413158018441	0.2934137980903961
105.0	2.102951677406959	1.1681374108317975
105.0	-1.8119769731352826	-0.4041705582506859
105.0	-2.329387862290132	-1.0573806506715064
106.0	4.692967169604874	4.6257994109415055
106.0	-6.8615569345102765	1.9769279766359007
106.0	-6.237102482604131	-5.6275336056500205
106.0	8.405692247509535	-0.9751937819273894
107.0	-1.3951957508405979	0.05039449389135833
107.0	1.4428694476165422	-0.8744483967262751
107.0	-0.04767369677596608	0.8240539028348981
108.0	0.4234553597833745	-0.5373350596496624
108.0	0.6795827609292696	0.1314714251863464
108.0	-1.1030381207126467	0.40586363446330853
109.0	-0.20283095876442342	2.5804581600666876
109.0	-1.1204381211673402	2.068208929017796
109.0	-1.0887214799582234	-2.717821260397978
109.0	0.35002277909675344	-2.462482270545639
109.0	1.4070438438073256	-0.9680267013590576
109.0	0.6549239369858963	1.499663143218175
110.0	-0.4245443717006225	-0.37682507290844675
110.0	0.38638494525756795	-1.001924780246396
110.0	0.24250871364303508	0.7572541690444136
110.0	-0.2043492871999955	0.6214956841104238
111.0	0.05771394232995141	0.26285761797004936
111.0	-0.2696554670364811	0.09192379443811666
111.0	0.2119415247065171	-0.35478141240817257
112.0	-1.0393845672291906	-1.2862833011699684
112.0	0.17312972243274147	-2.2900799842620696
112.0	1.0883120465827958	-0.05072416802002891
112.0	-0.22205720178636126	3.627087453452069
113.0	9.372992191981353	3.7824966996696783
113.0	-5.305088721650048	2.1688632608068166
113.0	-4.78150109109489	-2.0956974395113277
113.0	0.7135976207635855	-3.8556625209651707
114.0	-3.0060879282827435	-2.3150041863447406
114.0	5.484478170163973	-1.2540478551124297
114.0	1.8285381007835648	2.5125256401477465
114.0	-4.3069283426648	1.0565264013094107
115.0	-2.119036020306047	0.41516657844682825
115.0	-1.9800948825698117	-2.0962590877217275
115.0	2.6112862576631883	-0.4433437802730301
115.0	1.8667649406346867	0.8568752299670201
115.0	-0.378920295422012	1.2675610595808489
116.0	-1.1422130561673014	-0.7804218725009616
116.0	1.0419193386175165	-0.148965976365099
116.0	0.23156966878800592	0.3903238685641963
116.0	-0.13127595123820937	0.5390639803018376
117.0	3.6378481348833294	2.544160712650423
117.0	0.30439736811642437	4.860740246496913
117.0	-8.678837982498694	1.9891466217733993
117.0	-4.83810222698662	-2.979347069527594
117.0	2.460001085029732	-3.7921492037608084
117.0	3.3501355410969365	-3.0692071441639674
117.0	3.7645580803589382	0.44665583653161317
118.0	-1.2804627449276467	2.1814296177278254
118.0	-1.4755099784009096	0.6367011672125822
118.0	0.5872685040589066	-1.621692843882114
118.0	1.2059036310173306	-1.4048680101857869
118.0	0.9628005882523354	0.2084300691274739
119.0	-2.200573015393666	-0.3643002904575404
119.0	-2.263625978976471	-1.2447148504632306
119.0	2.3919630380423262	0.2263909127672004
119.0	2.0722359563277837	1.3826242281535608
120.0	0.053455591949189994	0.6486909475077172
120.0	-0.4273197288342079	-1.388506494183677
120.0	0.3738641368850182	0.7398155466759625
121.0	-0.24783564018003226	-0.10696524716694561
121.0	-0.25464061495788437	-0.39486701143588354
121.0	0.5024762551379157	0.5018322586028221
122.0	-1.144864202823208	-0.30999128463062553
122.0	0.36189006282569863	-0.8517800300323302
122.0	0.7829741399975237	1.1617713146629551
123.0	-1.164931263491728	0.8848479926624284
123.0	-0.12237518036719731	-1.5063431670237533
123.0	1.6508120536441468	-0.9479925554733728
123.0	-0.363505609785188	1.5694877298347238
124.0	0.21414936196593332	-0.7622263973246417
124.0	0.6202334690509176	0.20543716616760252
124.0	-0.8343828310168776	0.5567892311570732
125.0	-3.231013783292385	-1.0611989952406937
125.0	0.8196721090696083	-3.3792183432929144
125.0	2.4113416742227844	4.44041733853363
126.0	-0.08966284230376567	-1.4616886703838863
126.0	2.233268304061584	0.8575340656879908
126.0	-1.772633076562494	1.954883775352939
126.0	-0.37097238519532	-1.3507291706570241
127.0	-2.7059993186042743	-0.15717887808700898
127.0	1.901319987021427	-2.757949737359293
127.0	3.3490880498825106	2.3777167467546163
127.0	-2.5444087182996724	0.5374118686916804
128.0	-0.9776378305640882	-1.2024011835216943
128.0	2.903233301467074	1.6572145492938521
128.0	-0.5628006713578222	0.40760502268743426
128.0	-1.3627947995451426	-0.8624183884595721
129.0	0.6494262131506879	1.6091918307423365
129.0	-0.3694090924300784	1.732339318388934
129.0	-2.447665066483325	1.1363391012011763
129.0	-2.4147780099041856	0.8703755612928561
129.0	1.1259183746174226	-2.6785469664905768
129.0	3.4565075810494608	-2.6696988451347448
130.0	1.0996702021321285	0.6333396220873916
130.0	-0.6787243362961238	0.3811432909376217
130.0	-0.420945865836013	-1.0144829130249997
131.0	-0.9408177372226918	1.372085102399241
131.0	-0.24788831735677766	-0.3516380678026445
131.0	0.5710780153407305	-0.7194956896460667
131.0	0.6176280392387327	-0.3009513449505267
132.0	-2.6397599010906836	-0.6595337943271073
132.0	0.40263861490317326	-2.48325390442567
132.0	5.085671678539168	1.3907159441164776
132.0	0.04129141997328386	0.9289991128129944
132.0	-0.5337688249685787	0.8273650184182436
132.0	-2.3560729873564052	-0.004292376594941671
133.0	7.153278593381151	5.91390125499803
133.0	-8.33283966137617	1.0139502465628005
133.0	-4.15166490643281	-4.671760668436834
133.0	-3.6012647798760664	-4.840556868920465
133.0	8.932490754303897	2.5844660357964684
134.0	0.20712171354058642	1.414432349847772
134.0	-0.8108663075458564	1.123592921292552
134.0	-0.2054184142135732	-1.1580534185095974
134.0	0.8091630082188169	-1.3799718526307088
135.0	0.6685581020715522	-1.5623683827986896
135.0	0.6650445754856169	0.9027039837415423
135.0	0.6553249131027226	0.9084960972379447
135.0	-1.9889275906598716	-0.24883169818082002
136.0	0.4151184684722574	-0.16329038098790224
136.0	-0.1354406914532404	0.1306172073750978
136.0	-0.279677777019025	0.03267317361281617
137.0	4.422598152885164	-3.839245326697261
137.0	-1.6268669083192102	7.695655895415764
137.0	-3.6178155647838657	2.9996755889495663
137.0	-2.4667496395922495	1.0314179723928147
137.0	1.3061394455444648	-3.8341321308962044
137.0	1.9826945142657244	-4.0533719991646375
138.0	-4.633562630901839	-3.3415687905581573
138.0	-1.5343434537252205	-6.101579155262889
138.0	5.550231535746592	-3.713920084985468
138.0	8.614682014581255	0.8455017763935555
138.0	-3.9225224129473286	6.20326042838532
138.0	-4.074485052753446	6.108305826027643
139.0	1.1802061302700348	0.15340484806541932
139.0	-1.3695232766879213	0.10161126795802265
139.0	-0.8995550039255712	-0.22928886249642874
139.0	1.0888721503434717	-0.025727253527015027
140.0	-2.0814305295150883	1.4345712609781724
140.0	-2.113718437328551	1.1529811212463248
140.0	0.300199128000813	-3.25908606926305
140.0	0.3139388124946217	-3.2583992617705606
140.0	2.8840727828249033	0.23484771004898766
140.0	0.6969382435232593	3.695085238760114
141.0	3.0855929736444216	-4.211071985450001
141.0	1.979779968027621	1.6287303901837313
141.0	-2.9671572570036906	2.869785552644942
141.0	-2.098215684668352	-0.2874439573786647
142.0	-0.26461848800428645	0.026985248853580036
142.0	0.40161250418713723	-0.4460820719973389
142.0	-0.13699401618285023	0.41909682314379443
143.0	-6.4633175531066085	-1.081649627614894
143.0	7.221753908935445	0.15414617184179244
143.0	7.524648541347163	1.5145374116353536
143.0	-8.283084897176	-0.5870339558622517
144.0	-0.3606263533333866	-1.665087723612086
144.0	2.0522189402678617	0.2578594524078719
144.0	-0.6555301705173706	1.5543536269839637
144.0	-1.0360624164170753	-0.14712535577975194
145.0	0.7414752585006027	0.0014182567683010976
145.0	0.8784435626548952	0.04704424740878933
145.0	-0.7609815739753933	0.062363634532517566
145.0	-0.8589372471800768	-0.11082613870961411
146.0	1.6533366657832258	-3.148615567570748
146.0	1.3589163281105496	1.1240140894429285
146.0	-0.6912847078862289	1.6919651310522508
146.0	-2.3209682860075067	0.3326363470755852
147.0	-7.80040574665344	0.41498500278562694
147.0	6.04513554758246	-4.29252338993237
147.0	8.592650016641503	-1.8939541000984217
147.0	1.23830820711191	4.657379884982672
147.0	-8.075688024682458	1.1141126022624783
148.0	2.5659559795274682	-0.195052229086102
148.0	0.5582699695365941	1.231048745029616
148.0	-1.4662854964321712	0.14549124342141198
148.0	-1.6579404526319041	-1.181487759364919
149.0	-0.40218786265012796	1.547466775790186
149.0	-1.0654902673226685	-0.49142418243686214
149.0	1.4676781299728077	-1.0560425933533255
150.0	-0.3673927024650138	-1.8904834834903061
150.0	0.7981080164704498	0.7845361184211027
150.0	-0.43071531400543245	1.1059473650691973
151.0	-1.348104811860188	-0.0788811477990796
151.0	0.5426816706632772	-1.023061190751629
151.0	0.8054231411968826	1.101942338550702
152.0	-7.860299050248586	-4.259574611251695
152.0	0.07125133910080639	-4.9458810556205295
152.0	3.795309276188412	4.316313109778522
152.0	3.993738434959394	4.8891425570936855
153.0	1.9444725383005164	1.0777925798787966
153.0	-0.9178410593726193	0.5625767687304711
153.0	-1.0266314789278685	-1.64036934860927
154.0	0.8859325910017414	1.7621870767600076
154.0	-0.3962687688545055	1.4458586449561985
154.0	-1.7447901696456558	-0.34978805934522955
154.0	-1.1251780829970965	-2.475750384941023
154.0	2.3803044304955323	-0.38250727742995333
155.0	0.8358024628305127	5.843837914156916
155.0	0.3356115929287262	6.353756497314139
155.0	-5.343104514017912	4.929813851482352
155.0	-4.151581516233226	-1.6218886602700002
155.0	-2.638349616897723	-3.5473819682882404
155.0	4.633595026114857	-6.213912804821918
155.0	6.32802656527475	-5.744224829573232
156.0	5.08037185913117	3.9088849401269052
156.0	0.6042206287391608	5.031075988494028
156.0	-7.88786526975727	2.516477315273391
156.0	-3.5870034489658775	-6.470488512013719
156.0	5.790276230852821	-4.985949731880604
157.0	3.025687796903603	-2.0376441423669363
157.0	-1.8555008655764602	2.875813609285181
157.0	-2.1392294379041488	2.9875937658750917
157.0	-2.0397593576848423	-1.6963567255023555
157.0	3.008801864261847	-2.1294065072909882
158.0	0.6575002970339423	-1.3907102995200609
158.0	1.5310552472935302	-0.5689879441347143
158.0	-0.10625200999563379	1.0524220938218476
158.0	-2.0823035343318557	0.9072761498329504
159.0	-0.43141911273978867	-0.019802018033580615
159.0	1.3633553748473466	-0.7368206332861852
159.0	-0.21083822012559827	0.5553230870264472
159.0	-0.7210980419819575	0.2012995642932869
160.0	1.6266073883236851	-3.0772665532497125
160.0	2.3577000916525237	-1.2618016039092614
160.0	1.7295105610778336	1.9644263964401005
160.0	-2.393103251159287	1.3714376253993996
160.0	-3.320714789894762	1.0032041353194716
161.0	1.335769441718885	-3.4580650703506755
161.0	5.119849369994731	-0.5403706989407122
161.0	-3.1362151695323877	2.384050474313761
161.0	-3.319403642181189	1.6143852949776123
162.0	0.34524810901009634	2.7211378797748362
162.0	-1.5462239966353988	-1.9098062748697837
162.0	-0.06096766538637374	-1.3897018118179836
162.0	1.261943553011669	0.5783702069129166
163.0	-1.9266628099089513	1.744967369850676
163.0	-3.3697436902189946	0.8777220868914322
163.0	-1.7955003205893905	-1.9387849971942814
163.0	7.091906820717299	-0.6839044595478473
164.0	-0.6654646060099572	-4.071604242131415
164.0	2.8490065122893578	-1.8442349297413805
164.0	-2.183541906279418	5.915839171872791
165.0	5.779601615204072	-0.017542979652411247
165.0	5.091306320143197	1.8261935371513396
165.0	-1.8330839832236423	3.153840025487139
165.0	-5.234417639215233	-1.9554145670065215
165.0	-3.803406312908383	-3.007076015979535
166.0	1.2837555551457533	2.3351412032785017
166.0	-5.755597023186132	-3.0946364826163317
166.0	4.4718414680403855	0.7594952793378505
167.0	2.2864781779593346	3.086171820152696
167.0	-2.5570356193717925	5.122121124299008
167.0	-3.197317668639739	0.06818750257799172
167.0	-1.891359759191648	-8.651726141460538
167.0	5.359234869243846	0.37524569443083433
168.0	-0.4167912656089923	-0.28856604990042295
168.0	0.9742126149535468	-0.19718933906033098
168.0	-0.5574213493445829	0.485755388960752
169.0	-3.3153261858528382	3.7796549160815625
169.0	-1.4976718764849337	-0.9298008624001995
169.0	4.812998062337766	-2.8498540536813834
170.0	-3.999889471315644	-1.0267261549458315
170.0	4.527339701204212	-1.7417917853362992
170.0	3.684365929414317	3.464481382708031
170.0	-4.2118161593028915	-0.6959634424259049
171.0	1.5243073592111147	-0.8774817864776967
171.0	1.5000476810919205	-0.6976444294745134
171.0	-1.2314285011924282	1.5312686854171087
171.0	-1.7929265391106008	0.043857530535093454
172.0	2.2479073436665153	0.016506241456902604
172.0	0.0833888999054837	0.6615630830356961
172.0	-4.468868685646382	-0.4834735855227134
172.0	2.137572442074373	-0.1945957389698675
173.0	0.9141819573454175	0.7829469839449444
173.0	-0.7402546765332653	0.44738201616853684
173.0	-1.1865507550033263	-0.5948714062000174
173.0	-0.48368987590700624	-1.0942390193411806
173.0	1.4963133500982568	0.4587814254277122
174.0	0.6972739763270571	-3.1914415843657906
174.0	4.250497627572094	4.919866137650893
174.0	-4.947771603899137	-1.728424553285105
175.0	0.8131485780786192	-0.08263720373073145
175.0	-0.3748390018379568	0.4755257170544685
175.0	-0.43830957624068184	-0.3928885133237459
176.0	-1.8827455276119236	-0.27992999632325816
176.0	-2.326244088558706	-1.608614246851384
176.0	2.382938679230357	-2.096045989921128
176.0	3.402136353230022	3.834248564554335
176.0	-1.5760854162897548	0.15034166854144806
177.0	0.5552326044584794	1.1035065600376155
177.0	-0.42538102007092643	1.5493798453542178
177.0	-1.122732175987946	-1.6535762202659152
177.0	0.9928805916003867	-0.9993101851259254
178.0	-1.4187241806393218	0.4862368265388939
178.0	-0.9410941660229565	-1.521821340686829
178.0	1.570750459725798	-1.2776412979849052
178.0	2.1053796529194524	1.6357497212955254
178.0	-1.316311765983001	0.6774760908373105
179.0	-1.2824252089008688	-0.9656423804921959
179.0	4.297814963494311	-0.6949289306287796
179.0	0.43890477204464107	1.0075330260826665
179.0	-3.4542945266381113	0.6530382850382593
180.0	-1.2770043343525443	-0.6378847777733717
180.0	2.48457289334709	-1.6145259077487222
180.0	-1.2075685589945446	2.2524106855221224
181.0	-0.9934475620046881	0.9411210905388491
181.0	-0.8641951519843469	0.192845849823937
181.0	1.8576427139890372	-1.1339669403627792
182.0	-7.154692761464125	4.076181956732483
182.0	-0.44474916401722175	-8.983920355461075
182.0	1.8423067729787608	-6.553893482972944
182.0	5.7571351525026015	11.46163188170155
183.0	-1.0732567485953752	4.190931368942474
183.0	-5.385921644988949	-1.3342068339345057
183.0	2.9164246356884234	-6.343451718506643
183.0	3.5427537578958876	3.4867271834986804
184.0	-3.7037223530415604	0.6865522902780105
184.0	-0.13796810299318732	-1.4454764989811548
184.0	3.84169045603476	0.758924208703162
185.0	-4.203856210558806	1.5166090313286553
185.0	-2.31665837032569	-9.354630061911708
185.0	6.520514580884488	7.838021030583055
186.0	-1.8239501920646652	2.3497718612751863
186.0	-1.3345501455133946	-0.6504607351386276
186.0	1.0086033402562364	-1.5603533973034205
186.0	1.3431766983560869	-1.337967926268952
186.0	0.806720298965743	1.1990101974358165
187.0	0.7184273965955648	-2.3816108294007767
187.0	0.9119267060252333	-2.4345664717006117
187.0	1.1438701225502128	0.1360905649717181
187.0	-0.5209552542217446	3.4087996417983555
187.0	-2.2532689709492795	1.271287094331274
188.0	-4.196111299996313	-0.24310615894976303
188.0	1.1091923439329487	-4.161992567115038
188.0	4.717214651831075	1.1787243892441257
188.0	-1.6302956957676809	3.2263743368206748
189.0	0.01046392704446067	1.7541657240156303
189.0	-0.06547936634484955	1.7447420993663014
189.0	-0.20802196157586966	-1.167348799981149
189.0	0.2630374008763005	-2.3315590234007986
190.0	-8.618219716679905	0.38886730378785284
190.0	3.6376427245616507	-6.1506384547461295
190.0	4.980576992118253	5.7617711509582765
191.0	-2.1913949399776467	-3.9292388333555746
191.0	-2.0666394319342163	-4.532683388002389
191.0	2.123812432543444	-8.615583943838825
191.0	3.3770353366081793	-7.635347741505557
191.0	1.0021000112452143	7.2268002443632025
191.0	-0.8040019181223598	9.497810888506127
191.0	-1.440911490362658	7.988242773832959
192.0	1.1909481824812482	-1.5308199352699776
192.0	2.685380676495786	1.0450360703567763
192.0	-3.8763288589770424	0.485783864913173
193.0	6.693388290716444	-5.315420807084606
193.0	5.309855851664508	5.211539199932369
193.0	3.334083754633032	5.261939441838701
193.0	-5.303429411960817	2.769512586362996
193.0	-8.41939969767011	-1.0153737772571998
193.0	-8.126258684501192	-1.3631603324792387
193.0	6.511759897118157	-5.549036311313038
194.0	-4.041945592747794	3.133181924011514
194.0	-1.0924019916677545	-3.969471602541819
194.0	5.134347584415537	0.8362896785302988
195.0	-0.8691532565904764	-0.15808309022509368
195.0	0.40626700076080274	-1.3942118948941329
195.0	0.4628862558296642	1.5522949851192396
196.0	-2.724306110390736	8.913915525203056
196.0	-5.702948242366705	-6.550735948033185
196.0	6.133683855747665	-7.103193211900888
196.0	2.293570497009774	4.7400136347310164
197.0	-1.1449782985421448	0.7222042295117086
197.0	-1.4237211196344255	-0.21397223889779549
197.0	0.5283089620359555	-0.8993915703102334
197.0	2.040390456140591	0.3911595796962942
198.0	1.6194093468203685	-1.3605122115029948
198.0	1.261772392418291	2.4180980467863296
198.0	-0.11533561092698259	6.898949191148833
198.0	-2.603818699545619	-3.3396156396446517
198.0	-0.16202742876606685	-4.61691938678755
199.0	-2.9543340078883737	1.5848656020507228
199.0	-1.0853981891604187	-5.637940443828375
199.0	4.205539448680571	-5.564996210905159
199.0	1.5350714982153995	3.2091679327536067
199.0	-1.7008787498471893	6.4089031199291995
200.0	1.503364611696903	1.6022749419497402
200.0	0.2321152778950579	1.7340203924238466
200.0	-1.0508151142070643	-1.5019659441768947
200.0	-0.684664775384908	-1.8343293901967086
201.0	2.2384535124891385	8.39077595727394
201.0	-2.7465610528437527	-4.578042594777134
201.0	-2.181595812780297	-5.61433871947203
201.0	0.2652503297670441	-6.591723619372108
201.0	2.424453023367893	8.393328976347322
202.0	7.184736066530582	-3.116091038272279
202.0	7.079814009804258	-3.030861275626958
202.0	-8.573045220343925	4.76483508405392
202.0	-5.691504855990889	1.382117229845286
203.0	-0.8373158419728995	2.3829662219041143
203.0	-1.2508340506644298	-0.2759780661755035
203.0	-1.0416245679991072	-4.066209985511058
203.0	2.04272110324586	0.47497670397472025
203.0	1.0870533573905508	1.4842451258077265
204.0	0.6334296709212864	1.0173544712113358
204.0	-1.1241637380209308	-0.3986501791788181
204.0	-0.2538243187510292	-0.9916243988151587
204.0	0.7445583858506764	0.37292010678262116
205.0	1.8261078886940396	3.2879643714923654
205.0	-6.246666630705839	0.4572015405097018
205.0	1.2485928463580789	-5.3606466582155
205.0	3.171965895653726	1.6154807462134289
206.0	-0.003803566187198922	0.0008244404892919307
206.0	0.000328058635416136	-0.003934393431601805
206.0	0.003475507551791704	0.003109952942321495
207.0	-2.40659114769035	1.270423486760978
207.0	-3.107122319760282	1.0256502523446758
207.0	0.9457842126323739	-2.6750025124798626
207.0	4.567929254818256	0.3789287733742064
208.0	-0.30071124941343264	-0.911424278625709
208.0	0.6001522754685062	0.1443905967440454
208.0	-0.29944102605506984	0.7670336818816926
209.0	1.8440526245437556	0.19310150171859095
209.0	1.7448813980952869	0.8537663884176192
209.0	0.07347806249105204	1.9165455744474933
209.0	-1.9445704743295458	-0.4956642946409047
209.0	-1.7178416108005643	-2.467749169942795
210.0	-6.1220161185277835	1.4436286296952872
210.0	3.168114462760752	-3.554995028426042
210.0	2.977481468222662	-2.526750815668331
210.0	-0.023579812455610777	4.638117214399108
211.0	0.871058138792927	1.2521209554812287
211.0	-0.12238645778323004	1.8464950396257358
211.0	-2.2262929076436255	0.3065360198770611
211.0	-1.8679478928631947	-1.8650253844002203
211.0	1.5846221179227944	-0.8929848833589081
211.0	1.7609470015743813	-0.6471417472248752
212.0	4.086632891779231	-1.0745104940751655
212.0	-2.0529820415953837	8.14396747889889
212.0	-9.896736627303344	-2.519201277343525
212.0	3.722534051540575	-3.1502556091930103
212.0	4.140551725578906	-1.400000098287173
213.0	0.012129774402131121	0.41224126209206696
213.0	-0.08383361653411618	-0.18427847321519114
213.0	0.07170384213198747	-0.22796278887685587
214.0	1.254049041198677	1.2797758410328006
214.0	-1.018260593991636	1.2472845011868727
214.0	-1.2178398162717172	-0.3385471484604792
214.0	0.9820513690646748	-2.188513193759187
215.0	1.2000168045892072	-2.693236317390329
215.0	3.5067783867665328	-1.0369366118913705
215.0	0.6860114277702571	2.4025273403088514
215.0	-3.6103353517149617	2.2887064892507816
215.0	-1.7824712674110443	-0.9610609002779741
216.0	2.354490471283331	1.698091062993447
216.0	-0.5471770013880485	2.31949446408683
216.0	-5.022645394450264	-1.1492362292325793
216.0	0.3464653615120927	-2.5477321628172773
216.0	2.868866563042921	-0.3206171350304844
217.0	3.437373887065181	4.093301274169968
217.0	-0.5192705957905104	1.8177384710128641
217.0	-2.506070841850525	-1.8377970538031472
217.0	-2.723260965559533	-3.202875667348968
217.0	2.3112285161353583	-0.8703670240307171
218.0	-0.8091601938868596	-0.9395811844378908
218.0	1.2187656480433477	0.24386663520909868
218.0	-0.40960545415649796	0.6957145492288097
219.0	-0.6956531228789182	-4.237978784695668
219.0	3.6593256753860834	-0.7576670152012563
219.0	5.876842063241808	8.796577737083043
219.0	-4.521715857514325	-0.2567152727799243
219.0	-4.318798758234664	-3.5442166644062087
220.0	2.436332920159972	5.262170322734333
220.0	-3.6134896110572114	-4.221529353986523
220.0	-1.7508753812599827	-5.518714088079701
220.0	2.9280320721572055	4.478073119331907
221.0	0.009956970477384022	-3.3441820044253987
221.0	2.4867016823856996	0.5542140300121281
221.0	-0.6830916571795665	3.143610238037348
221.0	-1.8135669956835172	-0.3536422636240772
222.0	0.7739258000888168	0.9395877723506193
222.0	-1.1166513963457265	-0.30568832705212406
222.0	-1.0618379660848676	-1.0522337418149732
222.0	1.4045635623417467	0.4183342965164866
223.0	-5.589388061061378	4.398969721882853
223.0	-6.772620862305809	3.0976006932004894
223.0	-0.6705534545064978	-3.842479787577369
223.0	4.341972481314899	-3.8672322003251978
223.0	6.549738902229155	-1.6529468013257125
223.0	2.1408509943297034	1.8660883741449337
224.0	-1.9095567391588224	-1.3777920351472694
224.0	0.007818174497042998	-3.8646468989414746
224.0	2.408756006195054	-0.4499696718705017
224.0	1.9626489380838459	2.317197687998371
224.0	-2.4696663796171037	3.375210917960874
225.0	3.2064886199530327	-1.0902360120416652
225.0	-3.8451983268503205	6.678473184688269
225.0	-5.510537177867175	7.470896872232272
225.0	1.6629814974545483	-6.218167391446591
225.0	4.4862653873099205	-6.840966653432272
226.0	-1.5526248286303175	-3.751339589610765
226.0	3.7772149504423598	1.283185019591365
226.0	0.80906549171678	2.535894118917322
226.0	-1.2675993608711689	0.8945698051072642
226.0	-1.7660562526575976	-0.9623093540052131
227.0	2.0055570883710225	-4.050598671787656
227.0	3.5633545287124027	-3.3099666513163584
227.0	-2.4429132522427244	5.442978920310997
227.0	-3.1259983648407004	1.917586402793024
228.0	1.0577541670864918	0.6490078816398899
228.0	1.2322536162402866	1.6690523960402428
228.0	-1.3951124088885323	-0.8028868696436474
228.0	-0.8948953744382927	-1.5151734080365178
229.0	3.2252899531327404	-0.6934447183365575
229.0	4.328190856425399	1.7719574411049932
229.0	-4.965162271707173	2.4976523779230377
229.0	-3.18322189059988	-1.5715214411581386
229.0	0.5949033527489443	-2.0046436595333286
230.0	-0.5862522704789095	-0.14850580038481495
230.0	0.5524439687827145	-0.22746921866503994
230.0	0.033808301696199035	0.3759750190498481
231.0	5.24853579441636	5.595040836217434
231.0	-1.852076500045393	4.195301169200456
231.0	-3.5266284860903094	-4.218926625306475
231.0	0.13016919171937127	-5.571415380111417
232.0	-0.5857693587696055	-0.9418145250579467
232.0	2.0626676494291627	-0.10056427175043572
232.0	-0.01412693441180738	1.1028851838015223
232.0	-1.4627713562477451	-0.06050638699315949
233.0	3.847999413977578	-6.489432222859054
233.0	6.719244755165592	-7.092790098101582
233.0	7.751955494993227	-5.8736501179113585
233.0	4.130210398147152	3.2569041791887763
233.0	-3.688253700278942	7.578167538106845
233.0	-8.017089617900574	7.25025331124005
233.0	-9.676764275878794	5.6845837441235
233.0	-1.0673024682252106	-4.314036333787168
234.0	-6.616407824911871	-5.06025877213508
234.0	6.278662313336816	1.512916956542365
234.0	0.3377455115750629	3.5473418155927114
235.0	0.21290826245385416	2.3789017771360967
235.0	-0.9078041267471781	-3.6638872753034417
235.0	0.6948958642933168	1.2849854981673434
236.0	-6.518067774417428	1.3218137664792475
236.0	-6.701095161950829	-1.1406982801436885
236.0	2.7089864391215484	-9.031645074380842
236.0	12.854606337370392	5.06624617952583
236.0	-2.344429840123693	3.7842834085193786
237.0	-6.421366172189363	-6.4543267905657
237.0	4.913011357933205	-5.755162425777147
237.0	8.617562294168422	-3.248173201886796
237.0	4.891454233107943	5.914671459631711
237.0	0.8426197695201936	9.145042651843072
237.0	-12.843281482540387	0.397948306754854
238.0	-2.2210820625247085	4.573313113863094
238.0	-0.47660018354175265	-1.6342498776486882
238.0	2.697682246066458	-2.9390632362144054
239.0	-3.1906833510653527	-6.737864077386027
239.0	5.162449255789899	5.032117995590339
239.0	4.428258687806629	6.557279867016761
239.0	1.6434932567467186	7.933356770240016
239.0	-4.3413000633611665	-5.684070235589368
239.0	-3.7022177859167833	-7.10082031987169
240.0	-1.3767834115926847	4.430552444437848
240.0	0.3113414580732588	-2.471311690946924
240.0	1.065441953519414	-1.9592407534909317
241.0	-1.7166627415284548	-2.2185714865070123
241.0	0.04562802590287919	-2.5075803176058797
241.0	3.42983438332546	-0.1630992536337316
241.0	2.6731939784715517	2.6106908212984576
241.0	-1.3251743150224882	3.4110115168788933
241.0	-3.106819331148913	-1.1324512804307554
242.0	5.358660402989249	0.1313893807001196
242.0	-8.10951635806934	5.459892715533946
242.0	-8.278829022298165	5.451107614483807
242.0	3.669610943516736	-6.338170079279402
242.0	7.360074033861511	-4.70421963143847
243.0	-0.11750984027924499	3.1269957727207056
243.0	-4.880409418462358	-5.499097279112977
243.0	0.8233647351534712	-6.983036383956071
243.0	3.9463190217592152	5.666559474837353
243.0	0.22823550182893007	3.6885784155109858
244.0	-1.5822081880191448	0.4609150851343468
244.0	-0.6988699358051703	-1.6303412007904519
244.0	2.7033483630138346	-0.035674249076442066
244.0	-0.422270239189507	1.2051003647325484
245.0	2.8206204515652953	5.357689698490012
245.0	1.7608726791769809	6.335617651326619
245.0	-4.9352961624418485	2.075160280777217
245.0	-3.197288518884945	-5.4871019871342375
245.0	-0.6901383078740876	-8.476894850365463
245.0	4.241229858458583	0.1955292069058147
246.0	-0.0016572531122311964	0.09587143172425187
246.0	-0.0706061547062552	-0.057745367557357645
246.0	0.07226340781848507	-0.0381260641669042
247.0	4.848605997335642	0.978346437636919
247.0	1.417351446708754	2.500069010946245
247.0	-5.1702923270654875	2.6886494032902903
247.0	-1.3501958899420088	-2.5010444199115236
247.0	0.25453077296309257	-3.666020431961903
248.0	-2.667428149242209	1.5851905038204523
248.0	1.2300938299145643	-3.0038146391237373
248.0	4.085899594571673	-0.9901069858926684
248.0	-2.6485652752440476	2.4087311211959435
249.0	0.18059977936122132	-2.009423529577562
249.0	2.2589460662108913	0.10855376838387773
249.0	-2.439545845572107	1.9008697611936973
250.0	0.8112799902055822	0.20362733301809124
250.0	-1.353081643883456	0.6444287992731803
250.0	-0.9915401269401647	-0.11857761770931853
250.0	0.7057996115595606	-0.6646410589514636
250.0	0.8275421690584467	-0.06483745563049469
251.0	-1.0463384458383558	-1.006559329654518
251.0	1.499665859966203	0.44862990227483446
251.0	-0.4533274141278736	0.5579294273796708
252.0	-3.784808418829297	0.9004675428220016
252.0	2.805012167982521	-3.1495899225835546
252.0	0.681718504753963	1.055284883534868
252.0	0.29807774609280757	1.1938374962266765
253.0	-0.7874357150308026	-0.08460528109844988
253.0	1.3092814177421364	-0.1493844925028676
253.0	-0.5218457027113422	0.23398977360133102
254.0	-8.313170872186287	11.983297565098392
254.0	-17.08393486536453	8.844507802382257
254.0	-12.293688478087905	-5.130196510387383
254.0	-11.369600404771653	-5.8018504100505215
254.0	2.854265011406012	-8.202755379184698
254.0	18.259271007950016	-5.082216563863884
254.0	17.80401875872404	-2.817095200801831
254.0	10.1428398423303	6.206308696807671
255.0	1.9966557791142472	1.3350269807192447
255.0	-0.449501991642101	3.6862583061510095
255.0	-1.5471537874721464	-5.021285286870269
256.0	1.1539757897743208	-1.5665863091054733
256.0	-0.6665210967889342	2.1802805722283596
256.0	-0.7994212909216669	2.2744366537959904
256.0	0.31196659793629394	-2.8881309169188816
257.0	-17.73842802352202	-0.2005533027181012
257.0	-19.075275214373292	-2.1355176522472497
257.0	11.231425330212259	-9.800750627948041
257.0	16.593279980743123	4.657888445338766
257.0	8.988997926939891	7.478933137574595
258.0	-0.9850882979696088	-2.6216888391168376
258.0	0.22514017558760285	-1.9955852191247399
258.0	0.9963245757246155	0.357348093786418
258.0	-0.23637645334259993	4.259925964455157
259.0	1.2681381277835804	1.3712926090028381
259.0	-2.472458376073473	-1.5782274797103701
259.0	-0.6764910109431536	-0.9979283306503188
259.0	1.8808112592330435	1.2048632013578366
260.0	-0.33511266847808413	4.42911205522152
260.0	-1.8794246078395966	3.8649993113579364
260.0	0.3530605306527128	-3.7485333234856864
260.0	1.8614767456649461	-4.545578043093775
261.0	1.8861967418640724	-0.20674692964305794
261.0	2.095228811410599	1.3437210634927041
261.0	-1.7461957500229695	-0.23414736406263767
261.0	-2.235229803251697	-0.9028267697870366
262.0	-1.6321664553975184	-1.3804412888792483
262.0	2.254581130958464	-1.7015328795842373
262.0	3.9906627674449973	0.9926277893933909
262.0	-2.179797232709154	1.2235973544350356
262.0	-2.4332802102967914	0.8657490246350518
263.0	0.8641939321963995	-0.39246684410251415
263.0	0.3599555519183231	0.6628237965590434
263.0	-1.2241494841147227	-0.2703569524565293
264.0	1.5534475104921222	-1.2458402148190348
264.0	2.329433826318922	0.14062025909423262
264.0	-3.119201413843028	2.271021259091501
264.0	-0.7636799229680069	-1.1658013033666859
265.0	0.09333534753378714	-5.44393482148644
265.0	9.246110523598972	-4.0837628894068665
265.0	7.220596498483858	10.585017278622274
265.0	-8.32092933446358	2.014819257772905
265.0	-8.239113035153014	-3.0721388255018938
266.0	2.6095094287294622	-2.6679847594873056
266.0	4.5484687285850764	-1.0956317937339972
266.0	-6.937909197457936	6.431540721357102
266.0	-0.2200689598566323	-2.6679241681357992
267.0	-3.7207823686575607	-2.5423347392270084
267.0	-2.838468632134561	-3.2235647239492966
267.0	3.2858040281858782	1.4422273043007001
267.0	3.2812144704901565	1.5981839799973103
267.0	-0.007767497883908488	2.7254881788783094
268.0	-2.392933185562368	2.7230216414877235
268.0	-2.2374997697135854	-1.959277728792423
268.0	0.9837056399262057	-3.179093085317597
268.0	2.5073102383444685	-0.05021809408307144
268.0	1.139417077005288	2.465567266705374
269.0	0.2134669004020012	0.8545979082589212
269.0	-0.24869955545724823	0.8347650736317279
269.0	-0.29975014140720907	-1.1257652539965506
269.0	0.3349827964624549	-0.5635977278940885
270.0	-1.8394670266390427	-0.9986619098912475
270.0	3.324800001411995	-1.2755929588634318
270.0	-0.4998490427079782	1.1452777860590717
270.0	-0.9854839320649952	1.1289770826956116
271.0	4.951678203316498	-6.171375373376269
271.0	3.5665203656960727	-1.9407917033391229
271.0	-2.3511930642213517	4.811291741599575
271.0	-3.4623264050106184	2.6847060232913287
271.0	-2.704679099780616	0.6161693118244311
272.0	0.10345265603535961	0.36730806209325195
272.0	-0.9473644646139433	-0.532849367458254
272.0	0.8439118085785757	0.16554130536501363
273.0	-3.683091642567148	1.2414593573963453
273.0	2.140250024012184	-3.2186214544410676
273.0	1.542841618554978	1.977162097044717
274.0	2.17767267762398	3.001521275185315
274.0	-2.0552918890876164	-0.5344035685975783
274.0	-2.947108285623707	-3.267158251075507
274.0	2.8247274970873084	0.8000405444877463
275.0	0.7190934639359626	-1.1635209472884764
275.0	1.8263713285144911	-0.029945268072086792
275.0	-1.3811756981193404	0.9609743507269962
275.0	-1.1642890943311253	0.2324918646335567
276.0	-3.402109572699097	-3.127207369982819
276.0	4.662909788880801	2.458129439745038
276.0	-1.2608002161816754	0.6690779302377756
277.0	0.37550319375272706	1.490360666080589
277.0	-0.6607815426374612	-0.863606746300759
277.0	0.2852783488847355	-0.6267539197798143
278.0	0.6923758625829561	-1.68965708051414
278.0	0.9263315460323658	2.7665104424551132
278.0	-1.618707408615315	-1.0768533619409708
279.0	0.6770993154594309	1.067701499126409
279.0	-0.17679817713626214	1.3244523077627632
279.0	-0.6564501991452668	-1.2414035475209306
279.0	0.15614906082211036	-1.1507502593682126
280.0	-3.1325689054413632	-4.216146636221161
280.0	2.335280975497904	1.7404993241717295
280.0	0.7972879299434878	2.475647312049433
281.0	6.624061924505045	-2.2615912437248995
281.0	-4.558133180539853	3.0438423745466596
281.0	-2.0659287439651886	-0.7822511308217754
282.0	1.8662426231632965	0.7255471319206522
282.0	-2.0039975687067195	-0.3203692040794114
282.0	-2.207502918307459	-0.7171974373755466
282.0	2.3452578638508816	0.31201950953430596
283.0	2.1691569525564054	-1.212962607111879
283.0	-0.5280726637760379	1.6631617235474498
283.0	-0.7476651191529341	1.5876008936786556
283.0	-0.893419169627461	-2.0378000101142364
284.0	0.5277347642092675	-0.9129098961883325
284.0	0.2733407075625194	0.618206517679313
284.0	0.18234615847777275	0.6902827214764594
284.0	-0.9834216302495786	-0.39557934296741887
285.0	-0.47951276036861	2.450828326528502
285.0	-4.041059436106945	-1.2168376170155952
285.0	-0.0776392705926406	-3.25425008968702
285.0	4.598211467068201	2.0202593801741093
286.0	7.394195455320078	-1.6874970997082614
286.0	-1.9807005524776229	2.7349340284283383
286.0	-5.413494902842463	-1.0474369287200744
287.0	-0.8403846688938815	2.2638285690315354
287.0	-0.26427260467254626	-2.65255617499009
287.0	1.1046572735664015	0.38872760595859085
288.0	-4.328674715853348	-2.114961821147771
288.0	3.596495995898733	-1.8899578633378005
288.0	3.052696347979376	3.936410817848871
288.0	-2.3205176280247786	0.06850886663668172
289.0	2.6453407065828585	-1.7313909594114762
289.0	2.335014319011025	-0.950981379695761
289.0	-4.1995614339446385	4.841675052504146
289.0	-2.977125258468054	0.45568239460244814
289.0	2.1963316668188635	-2.614985107999284
290.0	0.4542001707005991	-4.9032226705281685
290.0	3.245625469731383	-0.17604134583532263
290.0	-1.6898376442243312	8.05642885857336
290.0	-2.0099879962076583	-2.977164842209861
291.0	0.21972854529967062	0.9389182323384484
291.0	-1.2273986827055565	0.44240087742650147
291.0	-1.5227185992768957	-0.612318189827699
291.0	0.2505272060921985	-1.3162584109414104
291.0	1.1559728569398926	0.08868724972638398
291.0	1.1238886736507407	0.4585702412777366
292.0	2.6505556711419294	-0.34148727516601485
292.0	0.6102854685789606	1.6682999155828573
292.0	-1.6419054364007872	0.8096457681180216
292.0	-3.3424495445907936	-0.722247628220657
292.0	1.7235138412707258	-1.4142107803142012
293.0	-0.10764962128308979	-0.09586203876640134
293.0	0.11964372123206861	-0.08560668566112063
293.0	-0.011994099948966759	0.18146872442750894
294.0	-1.9385664203347068	1.4543127111726086
294.0	-0.09945785075320389	-2.1029094134958495
294.0	1.0455012309259801	-0.005936098660968855
294.0	0.9925230401619305	0.6545328009842097
295.0	1.462004673026602	5.503664693596008
295.0	-2.037110900785347	-2.7039049951611407
295.0	0.5751062277587449	-2.7997596984348516
296.0	0.00192225217496659	-1.1609686581474508
296.0	0.47254438547199945	-0.1731747702842423
296.0	0.046213638895698905	0.5751865241101917
296.0	-0.5206802765426626	0.7589569043214871
297.0	0.25958474191219183	2.0950257674407755
297.0	-0.8749969665726675	-0.9828034371454897
297.0	0.615412224660452	-1.1122223302952827
298.0	3.5881999993620957	-0.14824676055228544
298.0	3.153743446302828	0.18481059289815788
298.0	-3.3930171625294983	-0.0046298476850105685
298.0	-3.348926283135408	-0.03193398466087174
299.0	-16.28500481535335	5.88458476033483
299.0	4.197114914575494	-7.143444726735971
299.0	5.870294407464595	-7.26287273732139
299.0	4.080354735053098	3.123542808710747
299.0	2.137240758260228	5.398189895011824
300.0	-2.470998055757248	-1.1761203808067915
300.0	-2.3178519334472956	-1.3863251856827028
300.0	-1.8033948585199895	-1.790028473930214
300.0	3.8047332183315596	1.5577347935759183
300.0	2.7875116293929794	2.794739246843775
301.0	-0.8038266659508166	-0.3431124052223605
301.0	1.0198746946724413	-0.3562064529495982
301.0	-0.21604802872161502	0.699318858171969
302.0	0.2632027556584112	-0.10533969666187455
302.0	-0.3110310097621983	0.3060499631921724
302.0	0.0478282541037907	-0.2007102665302781
303.0	0.19298608998915484	-0.49677393981129914
303.0	0.8268813615858068	0.23788016981684015
303.0	-1.0154574665253724	0.8357956659257962
303.0	-0.00440998504953993	-0.5769018959313094
304.0	-2.488692699779827	0.3658040678138409
304.0	2.0343501485792355	-1.7913318809513679
304.0	0.4543425512005684	1.4255278131375628
305.0	-1.5247236217822058	-1.0381657711534455
305.0	1.3561135104670188	-0.17544376278032314
305.0	1.7395856652243618	2.167592856521642
305.0	-1.5709755539091617	-0.9539833225878679
306.0	-0.3034865060093008	1.3734870707274678
306.0	-1.2555169856753003	-0.9440876959817234
306.0	1.559003491684611	-0.4293993747457416
307.0	5.371046476512523	-5.01751149068736
307.0	-2.847426709306463	3.6265525459327734
307.0	-2.666333422395797	3.224409477956343
307.0	0.14271365518974363	-1.8334505332017694
308.0	1.958578650238009	0.13163747498324163
308.0	2.2468643926733787	0.6587210354671578
308.0	1.6181085553614547	0.6736521249022449
308.0	-3.9171196625771922	-0.44843165545585206
308.0	-1.90643193569567	-1.01557897989677
309.0	1.1098329475263005	0.9355980656946736
309.0	1.0330041653626036	1.0729214288497708
309.0	-0.767498426953428	-0.13522526079268543
309.0	-1.3753386859354853	-1.8732942337517717
310.0	1.2706861982730229	0.20119000434152476
310.0	-1.0642783731726844	2.4323003879617473
310.0	-2.903302828654669	1.1398159537990522
310.0	2.696895003554324	-3.773306346102336
311.0	9.771777671257516	6.356600371693463
311.0	3.7303718964146717	6.8159475034645745
311.0	-19.294732485624483	-6.95999209080413
311.0	-14.968760337542696	-14.966770327180036
311.0	10.785661970833349	2.7594040984853256
311.0	9.975681284661638	5.994810444340782
312.0	-2.5797469528837316	0.8424029592281479
312.0	1.839922180035525	-3.6487956108969426
312.0	3.296564153280566	1.9278841328338492
312.0	-2.5567393804323664	0.8785085188349434
313.0	0.3725811407494521	-0.5227051375901125
313.0	0.28335212910978524	0.13616924005417078
313.0	-0.6559332698592256	0.3865358975359337
314.0	0.5189438319963767	1.638934960240971
314.0	-1.2876958979797928	0.1370979068727064
314.0	-1.5388094195451476	-3.2265617817963568
314.0	2.3075614855285638	1.4505289146826792
315.0	-1.2958606163631106	2.1067774482014743
315.0	-1.25466481215976	0.23340829803966573
315.0	-0.6515888038081209	-2.7378420727979327
315.0	1.634467312171649	-0.2718342633985525
315.0	1.5676469201593661	0.6694905899553414
316.0	-1.6312438174126662	-0.8466756287040373
316.0	-0.6006426956889523	-1.8004241059642223
316.0	1.8876002600109296	-1.2173505207724533
316.0	1.5412081474958392	2.9324808712242594
316.0	-1.196921894405154	0.9319693842163826
317.0	0.3608595473188903	-0.26006050569413963
317.0	0.5705347413212942	0.6030172753510912
317.0	-0.9313942886401553	-0.34295676965695276
318.0	-1.4332028592781276	1.768185367399838
318.0	-1.2089063834540446	-1.699269027010669
318.0	0.7141001360542721	-1.0219242159806399
318.0	1.673121841170258	-0.2938316141284982
318.0	0.2548872655075992	1.246839489719955
319.0	0.6169787710185158	1.996233816305153
319.0	-0.8768582158543251	1.9007672856977802
319.0	-1.5580554761046284	-1.4131251304348833
319.0	1.817934920940434	-2.4838759715680405
320.0	14.208908426034572	-2.189809477732452
320.0	-5.50325578664397	5.039734563766096
320.0	-6.973123021137766	1.1477044540279568
320.0	-1.732529618252857	-3.9976295400616153
321.0	2.386270677376659	-2.876542316700704
321.0	-0.7721614968670092	2.353598221575624
321.0	-1.6141091805096384	0.5229440951250633
322.0	-3.13905176209624	-1.0021832932660004
322.0	1.8932500649811368	-9.422397355017278
322.0	3.891479101687075	5.857859712315395
322.0	-2.6456774045719826	4.566720935967875
323.0	-1.6874304115533982	3.162520446532037
323.0	-2.6630583491515525	-1.017606524596209
323.0	2.0134199936103547	-2.171109515225557
323.0	2.337068767094603	0.026195593289726603
324.0	5.309784126516529	-3.956483613538301
324.0	-0.9136056876048553	2.7715838208124657
324.0	-1.663532680088328	2.396029107692793
324.0	-2.7326457588233533	-1.2111293149669569
325.0	-0.07183921555998432	0.03415441390201782
325.0	-0.017278351036474383	-0.05630194397302783
325.0	0.08911756659643855	0.02214753007098545
326.0	-6.6451757759959085	2.0008338634987637
326.0	-9.557364494464796	0.30596315131931107
326.0	-0.5744344876518164	-2.2523002990474965
326.0	16.77697475811255	-0.05449671577060383
327.0	0.44862667369003495	-0.8494509955618242
327.0	0.11074842740261116	0.9234536200723774
327.0	-0.9680748034459434	0.9521089910803454
327.0	0.40869970235327835	-1.0261116155909085
328.0	-0.2823717270058323	-0.3699575895372115
328.0	0.8145032440965638	-0.7747322148412474
328.0	0.046584045462334585	0.579188714511466
328.0	-0.5787155625530594	0.5655010898670055
329.0	0.1277121869662097	1.800684329258135
329.0	-1.2685730709163585	1.8509841998171417
329.0	-0.4852491980746344	-0.9104387728078153
329.0	1.62611008202477	-2.7412297562674555
330.0	-0.07969668549179404	-0.4471444480149631
330.0	0.4899808716779502	-0.13305522642711154
330.0	-0.4102841861861443	0.5801996744420853
331.0	-5.576079102088972	-1.1728652515845976
331.0	-3.032121802507986	-4.659930218940166
331.0	-2.5263463001229733	-5.209731591788792
331.0	5.668308724157903	2.977085670902057
331.0	5.46623848056197	8.065441391411522
332.0	-3.8630004965838762	-2.551975803284529
332.0	-5.070802167108377	-6.285969624268936
332.0	5.991828032167817	3.9079089764159214
332.0	2.9419746315244946	4.930036451137535
333.0	0.5706424186813926	-0.8909173219732989
333.0	1.689054933016724	1.3399185462283503
333.0	-2.2596973516981103	-0.4490012242550367
334.0	0.7925801469589725	0.1261370915619759
334.0	-1.2543240463593583	0.5366368218558464
334.0	-0.4141083023434182	-0.40169014936660946
334.0	0.8758522017438297	-0.2610837640511819
335.0	-3.0817738967025603	1.4785755565763394
335.0	2.9156630539373287	-2.225836858534835
335.0	3.2781518775631877	-1.0669525868737446
335.0	-3.1120410347979557	1.81421388883224
336.0	0.04791809635249561	-0.19937443227896653
336.0	-0.0032698260300803137	0.26405599542378805
336.0	-0.04464827032243738	-0.06468156314480365
337.0	0.31095433730316185	1.2319803505979243
337.0	-1.9809303245402077	0.41704030663107927
337.0	-2.058847466980466	0.28397108052027853
337.0	1.0059273818559016	-1.312715168963407
337.0	2.7228960723615616	-0.6202765687859028
338.0	-0.21599579882487124	-0.07914249820996587
338.0	-0.1701038859390733	-0.08731809133261911
338.0	0.3860996847639446	0.166460589542585
339.0	1.0889572366070583	1.958728862595871
339.0	-1.038276250034411	-1.1754608189015279
339.0	-0.05068098657264166	-0.7832680436943389
340.0	-0.2301837191958899	-0.03972985377886318
340.0	0.15720842516654007	-0.024069664145104988
340.0	0.07297529402934844	0.06379951792397513
341.0	-5.942446311117055	0.42755209934090527
341.0	-6.426864439785523	-3.1635447084335664
341.0	8.31550800986115	0.6075575873024792
341.0	4.053802741041442	2.1284350217901786
342.0	-0.8302085396314746	-0.5232356725128265
342.0	1.433208206811349	-0.7138824897190963
342.0	-0.6029996671798838	1.2371181622319358
343.0	-0.2535433873249383	-3.6219419712090706
343.0	1.7668118398908814	0.5567378351993477
343.0	0.4574429926307956	2.6957368574065614
343.0	0.0757486456419006	2.6345942214665192
343.0	-2.0464600908386257	-2.2651269428633363
344.0	0.2665174077091065	-1.4299182810025157
344.0	0.7002718457545916	-1.267329741452809
344.0	-0.9667892534636732	2.697248022455331
345.0	-7.335196963832264	-1.6357026632023302
345.0	7.530443140458258	-3.5124121981621537
345.0	13.422351719773191	-0.656262861389095
345.0	-13.617597896399197	5.80437772275357
346.0	1.345173808502059	1.2507889218415187
346.0	0.9801445463304044	1.3741523855772315
346.0	-0.4347296749244209	0.5674298605516073
346.0	-1.3555495443552839	-1.6188252170984034
346.0	-0.5350391355527762	-1.5735459508719354
347.0	5.0865206885399274	0.028933096583610443
347.0	-5.035252261183602	2.7384105167090267
347.0	-0.051268427356318785	-2.767343613292634
348.0	-1.237189806376561	-0.1923807713839284
348.0	0.9537211307854192	-0.32214826076758196
348.0	0.2834686755911481	0.5145290321514793
349.0	-1.4985865846672923	-0.12164380916733476
349.0	2.6903210563223627	-0.6851610731543246
349.0	-1.1917344716550762	0.8068048823216172
350.0	-0.4977627682305239	0.17019047260164816
350.0	-0.39592579101860925	-0.32549612241438386
350.0	0.8936885592491763	0.15530564981273665
351.0	0.29035628842835753	-1.7510696033028064
351.0	0.3218419421352406	-1.737251748705025
351.0	1.017664763176215	2.1748760711316386
351.0	-1.6298629937398277	1.3134452808761825
352.0	0.34121560848901816	-0.5111002425731098
352.0	0.5451218898485871	0.2504292222100083
352.0	-0.8863374983376076	0.2606710203631155
353.0	0.4136642669083767	0.19897998081416088
353.0	-0.9773394628740661	0.0452874586524788
353.0	0.5636751959656637	-0.2442674394666258
354.0	-3.337691749355304	4.830138285123978
354.0	0.5784938701672535	-8.918540434200153
354.0	2.7591978791880836	4.088402149076148
355.0	-1.939440402379477	1.3038001296815611
355.0	-2.8661022174610555	-5.153149073376091
355.0	4.805542619840533	3.84934894369453
356.0	0.373379893256752	-1.157008775331588
356.0	0.6364482598102502	0.27240441046729597
356.0	-1.0098281530670303	0.8846043648642975
357.0	-9.265051784343687	3.763803746414012
357.0	-9.165796552743178	0.5422616438213493
357.0	-1.7248639931046545	-3.251366051377322
357.0	7.023885764337168	-4.020849202631304
357.0	9.377047010727644	-1.3822612995140189
357.0	3.7547795551266643	4.348411163287281
358.0	-11.303488821797147	-0.9001281049680382
358.0	-0.6989411614494431	-8.116779896404234
358.0	11.80004130476999	-4.4352793055063175
358.0	12.659313804250356	3.423296517255676
358.0	-0.9176668747787453	10.569075502578746
358.0	-11.539258250995024	-0.5401847129558067
359.0	-0.45220090437664245	-2.062109411828522
359.0	2.3747603256650365	3.3708123592148604
359.0	-1.1648592415319146	1.083759325461256
359.0	-0.7577001797564645	-2.3924622728475944
360.0	-1.5462325173255524	-0.7690900828169398
360.0	0.5933739089130132	-2.1577348849609743
360.0	0.5294214441452598	1.457743345121079
360.0	0.42343716426728545	1.4690816226568628
361.0	-0.014422441146704896	0.17383723249938876
361.0	-0.025144357822291224	-0.08606669907624587
361.0	0.03956679896899103	-0.08777053342315795
362.0	1.6742973147040532	-1.0572894920366196
362.0	1.0052593070452105	1.2112871079078282
362.0	-1.6189528388465542	0.3814428495867314
362.0	-1.0606037829027095	-0.5354404654579401
363.0	1.4083278478474168	1.8003191072767886
363.0	-1.569650715008737	-1.0938478638610618
363.0	0.1613228671613241	-0.7064712434157209
364.0	-1.0932467916668192	-0.167250995871885
364.0	0.5452735999876122	-0.49365032943749093
364.0	0.5479731916792118	0.6609013253093812
365.0	-0.42379678627553685	0.339256138253504
365.0	-0.047905067148034094	-0.4084924785468297
365.0	0.4717018534235819	0.06923634029333237
366.0	-1.1001276092491419	0.35149671216053446
366.0	0.9848945305592715	-1.1243219668924034
366.0	0.11523307868985233	0.7728252547318779
367.0	1.3440953895601921	2.5651837231736407
367.0	-4.73346083208834	2.3522444393266233
367.0	-1.8230541483801168	-5.032156325491155
367.0	5.212419590908244	0.11472816299091092
368.0	-0.2564709256756751	1.1982481269053034
368.0	-0.9739080476905599	-0.21722962603627247
368.0	1.2303789733662265	-0.9810185008690443
369.0	0.09607828594505449	0.8320589326279866
369.0	-0.38169022680327586	0.17086053611818855
369.0	0.0653310267179535	-0.6441088020173839
369.0	0.22028091414026718	-0.35881066672879297
370.0	0.4497441754397763	-1.5592720385938261
370.0	1.3330735013612298	0.5361612891401919
370.0	-0.0669134944571406	1.2872702854665181
370.0	-1.715904182343869	-0.2641595360128977
371.0	-7.510520751560994	-0.08429488424291222
371.0	-5.901387350717665	-2.8549390206175342
371.0	2.281932673385741	-3.2208604068840745
371.0	15.338852685159923	0.7482614774661197
371.0	-4.208877256266964	5.411832834278391
372.0	0.29949415723233147	-0.6334598704925143
372.0	0.7287720670577668	-0.38905229457065554
372.0	-0.36925784761368546	0.5097304378573143
372.0	-0.6590083766764214	0.5127817272058421
373.0	2.9011244949838186	1.0579996660672888
373.0	-2.652597142491657	0.708885588345329
373.0	-0.2485273524921675	-1.766885254412613
374.0	-0.00561549212981463	0.05329078419478498
374.0	-0.2498956141551439	-0.0793707135587392
374.0	0.25551110628494755	0.026079929363965706
375.0	8.107594122014541	-18.55394798143834
375.0	2.652224715066295	4.3160850979021745
375.0	2.4891615961535978	4.654676583847622
375.0	-1.2280879149472743	10.402575133844978
375.0	-12.020892518287106	-0.8193888341563769
376.0	-0.3800295201569716	0.2720723781921325
376.0	-0.645118659377726	-1.0264682198064663
376.0	1.0251481795347115	0.7543958416143515
377.0	1.4539014119316205	-1.0628209530494377
377.0	2.4373115856707224	2.32847609755595
377.0	-1.6341336202764944	-0.047760198408219184
377.0	-2.2570793773258817	-1.2178949460982813
378.0	-1.3412061611762247	0.2769194795460039
378.0	0.4504771408732632	-1.1534747531874192
378.0	0.8907290203029603	0.8765552736414007
379.0	-0.3080555208786386	-0.7221339248088585
379.0	0.7908009187742349	0.32709509134158643
379.0	-0.48274539789558524	0.39503883346726304
380.0	-3.5551225332713283	-0.4465062484346223
380.0	0.7617066992166981	-1.8635000536864244
380.0	3.19402462003944	0.34113838032855254
380.0	-0.4006087859847877	1.9688679217924983
381.0	6.490113469940328	-6.962168024710138
381.0	16.70149607491221	-7.537973563047674
381.0	-3.9921396870293373	5.151076207364265
381.0	-8.950232527848438	5.2001815920668895
381.0	-10.24923732997473	4.148883788326642
382.0	-1.9073391293746473	-1.0185430948384437
382.0	0.5028447159233576	-0.9960857585122946
382.0	1.4044944134512969	2.014628853350738
383.0	-0.03640481239230041	-0.34514375850689416
383.0	0.07587190086990694	0.08730187805625284
383.0	-0.03946708847759696	0.2578418804506518
384.0	-1.5236902020167091	1.3313977870404639
384.0	0.7858773123594895	-1.5286282907824862
384.0	2.0548474307095654	-1.1267333404314104
384.0	-1.317034541052351	1.3239638441734753
385.0	-0.08116861071456313	0.1784107659472966
385.0	0.05208194376094416	-0.15640322389680444
385.0	0.029086666953642305	-0.02200754205052853
386.0	-0.11088331713083961	0.5209343611039076
386.0	-0.02425970835848073	-0.3019058898911312
386.0	0.13514302548933466	-0.21902847121277688
387.0	4.029866532781286	7.998288599259204
387.0	-3.6542077571585136	-2.2589529882504724
387.0	-0.37565877562276495	-5.7393356110087455
388.0	-1.8861743540207765	-1.7144831687067226
388.0	5.104795790181663	0.5837583212303928
388.0	-3.218621436160861	1.1307248474763416
389.0	0.42014350075613854	-0.925452583097996
389.0	1.4182000591731259	2.7716001275717415
389.0	-1.2429835840963286	0.16713883581087244
389.0	-0.5953599758329479	-2.0132863802845953
390.0	-2.8869523433286353	3.054836296861367
390.0	0.7224554723227783	-6.416451242998101
390.0	2.164496871005855	3.361614946136749
391.0	2.8143267828137666	1.3817198966074262
391.0	-0.4325442535434228	1.8841804067288628
391.0	-5.7522730590629285	0.17219205591335826
391.0	3.370490529792572	-3.4380923592496417
392.0	1.975911043217255	-0.7466455193151256
392.0	1.9807116131915492	-0.6954197033944401
392.0	-1.9933528294725544	4.454556806213845
392.0	-1.9632698269362563	-3.0124915835042927
393.0	-6.544835849986513	0.14815763831245296
393.0	-7.124115589321618	-2.605827021407202
393.0	-3.0951554783240263	-2.8078732489831175
393.0	9.266854157509433	2.4035497986312144
393.0	7.497252760122707	2.861992833446613
394.0	1.2170582284562468	-3.525935907850917
394.0	2.3495760173759277	0.7695126791967493
394.0	-3.566634245832189	2.7564232286541697
395.0	7.157867323269768	-4.247845204346283
395.0	7.083287562512082	-3.6115473623301644
395.0	3.794046077373326	0.31826244279143495
395.0	-10.382239422865938	7.632577756941971
395.0	-13.737324423236664	4.550063387645547
395.0	6.084362882947468	-4.6415110207024926
396.0	1.1934854210737145	-1.1167882375104985
396.0	2.2371684971830375	0.11490833012689011
396.0	-3.4306539182567537	1.0018799073836377
397.0	-0.9666277130755143	-0.6221009778868893
397.0	-0.5566190355602907	-0.7087693321005643
397.0	2.0425901188181017	0.5113792876373668
397.0	-0.5193433701822946	0.8194910223500935
398.0	-0.666619789950939	0.6164555383463411
398.0	0.23492521191480287	-4.958956450570536
398.0	0.6857513780446935	2.4547891241226347
398.0	-0.25405680000856956	1.8877117881015344
399.0	0.5853304259128439	-0.0001639000957599823
399.0	-0.058725464086442275	0.38109762923471396
399.0	-0.5266049618263942	-0.38093372913894186
400.0	0.14980348381600864	0.2815603968744532
400.0	-0.3899370587518684	-0.03618221203983692
400.0	0.24013357493583082	-0.24537818483462095
401.0	-0.915381643553605	6.161322579668185
401.0	-3.7845150783747545	1.7587629645563703
401.0	-3.538662204248424	1.0737442720659913
401.0	4.072631182635049	-4.78110225249221
401.0	4.165927743541705	-4.21272756379834
402.0	-0.4730790101274631	1.1902113124380964
402.0	-0.5663578143323988	-0.22491980975654863
402.0	1.0394368244598617	-0.9652915026815477
403.0	0.21457155553312876	-0.17919270885006128
403.0	-0.09125117015698997	0.29994279484551617
403.0	-0.1233203853761388	-0.12075008599545489
404.0	-5.3423972886324425	0.10802754243790819
404.0	-5.4685089563864455	-1.1680959027112467
404.0	9.068609653481856	-2.0150686589237417
404.0	6.14870692383476	1.5668007153044996
404.0	-4.40641033229772	1.508336303892594
405.0	0.7768868376179179	-1.2206552272681626
405.0	0.5198337735053002	1.2792410807759602
405.0	-1.2967206111232084	-0.058585853507796215
406.0	-2.5032780457534063	-0.6162365147502561
406.0	2.048957299128441	-1.6399543475324299
406.0	2.655654462616324	-0.5247947979487327
406.0	2.057227813697521	-0.06311328984843287
406.0	-1.6282162790603476	2.169651174019111
406.0	-2.630345250628577	0.6744477760607421
407.0	0.8475909643552698	0.9371476868939554
407.0	-0.895115152079946	1.1875303608892966
407.0	0.04752418772466176	-2.1246780477832456
408.0	1.1323696511255676	3.0436805201990222
408.0	-2.7252697493807796	-6.016543335069676
408.0	1.5929000982552055	2.9728628148706115
409.0	0.5815884847059356	0.5724723717315404
409.0	-1.384728115709156	-0.31001418034477296
409.0	0.803139631003202	-0.26245819138675947
410.0	1.2440540507698754	1.2152322225923802
410.0	-1.1205471160452	0.2357089249786151
410.0	-1.4362785323894072	-2.6467376355174044
410.0	1.3127715976647587	1.1957964879464194
411.0	2.0126266699891553	1.6573479486232987
411.0	-2.6140839295942735	9.064845148259868
411.0	-1.2953436227581603	-4.952052422905022
411.0	1.8968008823632958	-5.770140673978134
412.0	0.6987078366171818	-0.3030272527901395
412.0	-0.10829260078137656	0.8073280197186736
412.0	-0.5904152358358191	-0.5043007669285421
413.0	-0.007543041371974077	0.017048922061968237
413.0	-0.013439819166100809	-0.024276670090750126
413.0	0.020982860538071073	0.007227748028787884
414.0	-0.49457270535788644	-0.67552245976231
414.0	0.19711602556475805	-0.3742124936418345
414.0	0.504119339228411	0.3801472714424195
414.0	-0.20666265943529674	0.6695876819617262
415.0	0.04489930184530349	0.006702898655520393
415.0	-0.0415891209157508	0.1540777458942082
415.0	-0.0033101809295671466	-0.16078064454973096
416.0	-0.8227533522394298	-1.6218001183736497
416.0	0.9935365963832632	-0.8693294202409638
416.0	-0.17078324414384174	2.491129538614625
417.0	-0.6376898003706601	1.3958617411578793
417.0	-1.3630261093236418	0.6280192445745924
417.0	-0.009268005944503919	-0.8284908941534133
417.0	2.0099839156387707	-1.1953900915790627
418.0	-2.143169003405939	0.3715508142356784
418.0	3.4799170435248308	-0.9764806100771452
418.0	-1.3367480401188931	0.6049297958414636
419.0	1.1635046624161391	-2.5219370855708365
419.0	-0.2247903604442761	2.3992770399028216
419.0	-0.9387143019718487	0.12266004566801407
420.0	-0.317550771847595	0.19951448299634897
420.0	-0.16033555342152533	-0.15105576447120309
420.0	0.4778863252690891	-0.048458718525139964
421.0	4.091440362053628	-1.7390134593534987
421.0	4.556067622125426	-1.3849676611512745
421.0	-1.7345068613615848	5.722446023134232
421.0	-6.913001122817474	-2.598464902629465
422.0	-0.02224719477993166	-3.2369061625691598
422.0	1.5145936180970148	1.8043289307100163
422.0	-1.4923464233170924	1.4325772318591306
423.0	-2.1384894868105384	1.310855329843383
423.0	2.168263735154686	-3.2493755040820447
423.0	-0.029774248344121387	1.9385201742386442
424.0	-3.5125453952632446	-2.3632866818310645
424.0	2.6459052467177737	0.15541627763016871
424.0	1.9253706278059306	1.636073001010826
424.0	-1.0587304792604852	0.5717974031900686
425.0	0.20115654548581863	1.8246248591492973
425.0	-1.0826729013012668	0.2694735743316562
425.0	-0.24141008296756042	-2.5961794389247927
425.0	1.1229264387830054	0.5020810054438329
426.0	-1.1673030642742472	0.7895603642161054
426.0	-1.1475780299194864	-2.310751251584142
426.0	1.0996371782228862	0.6069956295896966
426.0	1.2152439159708546	0.914195257778353
427.0	0.0566425013085487	0.03743379574910018
427.0	-0.0968049673196408	0.06365376762259702
427.0	0.040162466011092114	-0.10108756337169009
428.0	-0.060811261828200416	0.022914177408177007
428.0	-0.011878826063722809	-0.04892889465553431
428.0	0.0726900878919351	0.02601471724736513
429.0	-0.16297343458589475	0.08147986215542725
429.0	-0.06993280312081945	-0.06589880085818302
429.0	0.23290623770670077	-0.015581061297248863
430.0	0.10141267947351527	-0.09238438001026321
430.0	-0.022470187046151967	0.17394382685113316
430.0	-0.07894249242737744	-0.08155944684086845
431.0	-0.09177526360691382	-0.10302411580158921
431.0	0.21118658035394128	0.14485861011684567
431.0	-0.11941131674707238	-0.0418344943152573
432.0	-1.5388029784818646	-0.5642997730588509
432.0	0.9811356135592182	-1.2301156717411015
432.0	0.5576673649226463	1.7944154447999523
433.0	0.022810218326952552	0.5418211390636574
433.0	-0.226083973069962	0.030966120502217226
433.0	0.2032737547430114	-0.572787259565878
434.0	0.5991293698013637	-2.821612734484576
434.0	0.7404741897419478	1.2059552319887181
434.0	-1.3396035595432918	1.6156575024958362
435.0	0.2441842407796621	0.03896480116826231
435.0	-0.1745327138602522	0.1647811949772576
435.0	-0.06965152691941487	-0.20374599614553934
436.0	1.0977477369446427	-3.404741848894228
436.0	1.1221060784883172	2.176784615230014
436.0	-2.21985381543296	1.2279572336641937
437.0	0.20148363172515973	0.0688863155467057
437.0	-0.278257176040879	0.10412451503664781
437.0	0.07677354431569786	-0.17301083058335065
438.0	-0.008678569009165147	-0.06536980141952128
438.0	0.034169514932523126	0.0544115381700269
438.0	-0.025490945923354453	0.010958263249508606
439.0	0.12368723103977472	-0.05075487243535912
439.0	0.024734804688359802	0.0716699448862154
439.0	-0.14842203572814403	-0.02091507245084514
