# Supplementary material
Source: ML conference proceedings conference paper supplement (https://openaccess.thecvf.com/content/CVPR2021/html/Harel_Crossing_Cuts_Polygonal_CVPR_2021_paper.html)
Supplement: Supplementary file 2 [file Harel_Crossing_Cuts_Polygonal_CVPR_2021_supplemental.zip › Dataset/D4/p1/pieces.csv]

piece	x	y
0.0	0.24627657820083637	0.4648223680082049
0.0	-0.10102676967485139	0.10270418012640091
0.0	-0.2800730281006963	-0.2761688793204757
0.0	0.1348232195747283	-0.2913576688141409
1.0	-0.86885106889579	-1.8890143920846798
1.0	-0.20017658386794904	-1.5049250940333476
1.0	0.5685038010708041	1.6771989930995184
1.0	0.5005238516929047	1.7167404930184789
2.0	1.5118058501666938	-0.9315307112086939
2.0	1.9647318637130629	0.3160686161943851
2.0	-3.476537713879751	0.6154620950143048
3.0	1.103479871147954	1.298563909582203
3.0	-1.6045098695729025	-0.011738655460741548
3.0	0.5010299984249512	-1.286825254121477
4.0	-0.8864885171799012	7.145254236524045
4.0	-8.570063425562092	7.686552074625224
4.0	-7.009063765732206	0.1349967952868492
4.0	7.185920598941079	-7.942349971386103
4.0	9.279695109533085	-7.024453135050009
5.0	-0.012852638511221719	-0.9192845890755417
5.0	1.1345944990978716	0.40790801813553973
5.0	0.06676249673286147	1.9582816158963992
5.0	-1.1885043573195042	-1.446905044956339
6.0	0.5450281317602907	-0.735210773977576
6.0	-0.7597414822340508	1.5654419819991396
6.0	0.21471335047373627	-0.8302312080215735
7.0	-4.8206183052347855	-7.461892538776325
7.0	8.777840672874058	6.693802366179125
7.0	-3.957222367639276	0.7680901725971974
8.0	-6.581304409208863	-2.436725666432935
8.0	2.778510141406911	-7.27280519048169
8.0	3.8027942678019517	9.709530856914625
9.0	-3.0391547880447196	-0.5696017188839452
9.0	1.9278994889517767	-0.8686482608845456
9.0	2.329780370794004	0.15732453824043482
9.0	-1.218525071701076	1.280925441528061
10.0	7.278530252954173	2.023388239713437
10.0	-3.634268798431038	3.986452420205692
10.0	-5.465752088982662	-2.4692320583314427
10.0	1.821490634459541	-3.5406086015876905
11.0	-0.2827863701875114	0.4072157897321314
11.0	-0.819535079968004	0.5358922096967679
11.0	0.24244692376575294	-0.6782870772221058
11.0	0.8598745263897785	-0.26482092220680575
12.0	-1.4918842699938215	3.9260368845527247
12.0	-2.2484765908992665	-3.5797096824492827
12.0	-1.6642677155514571	-4.0444120661362986
12.0	2.7167060472599514	1.5489055209992553
12.0	2.68792252918459	2.1491793430335564
13.0	0.08773872118476578	5.7231082043048485
13.0	-4.131173105532231	4.175423072239549
13.0	-3.8408017445790654	-9.535282813113854
13.0	4.221230412008375	-5.443053048853874
13.0	3.663005716918158	5.079804585423326
14.0	6.364941379456674	-6.882867055174504
14.0	0.4408693681650905	3.1155521472833634
14.0	-2.678640050190283	4.818393342709327
14.0	-2.7091693112725435	4.77407887069125
14.0	-3.9409817923534627	0.9849031695034162
14.0	-3.8103212056926385	0.24950191901044635
14.0	6.333301611887175	-7.059562394023292
15.0	-2.0489110523367096	-1.0355399558327136
15.0	-0.6964450645687525	-1.7236541971973716
15.0	0.3258302984591201	-1.3170657065994387
15.0	1.7465608978250977	0.14625511332062482
15.0	0.6729649206212812	3.9300047463089447
16.0	3.0367656239681136	-1.5587611347257009
16.0	4.385884495364566	2.4542197802982355
16.0	-2.608715949342318	0.8994542766277241
16.0	-2.4852241266401487	-0.8376179551481905
16.0	-2.3287100433501777	-0.9572949670520641
17.0	0.9175344151656808	1.1346708387616473
17.0	-0.944887804626865	-0.7251401909857216
17.0	-0.5027520091237903	-0.6273624311291833
17.0	0.530105398585019	0.21783178335325235
18.0	1.4133652397478011	-1.9470652599398368
18.0	1.1470458357610098	-0.030761948070466883
18.0	-0.6739859936841921	2.55682101017159
18.0	-1.886425081824626	-0.5789938021612862
19.0	11.04738827094404	1.6700933515515421
19.0	-0.014725086537937186	6.63736667974827
19.0	-9.50451299833599	5.382071868085083
19.0	-18.945555401195588	-1.524720064692754
19.0	2.1964676019476626	-9.456668407205305
19.0	15.220937613177865	-2.708143427486951
20.0	-1.0002544402688434	0.7224713342672073
20.0	-0.1346378891842755	-2.2395859099925275
20.0	1.164475546660746	-2.8149008648749865
20.0	-0.029583217207641482	4.332015440600344
21.0	-0.4423115381118148	0.5682530852817426
21.0	-1.0445975498953826	-0.13203076278167544
21.0	-0.3529928688167823	-1.1350573365248762
21.0	1.2527863945596744	-0.06489098115738828
21.0	0.5871155622642846	0.7637259951821425
22.0	-3.6019510626326414	-2.2126006388089428
22.0	2.961301410143685	0.49352822332172885
22.0	2.7628592367060762	0.9834054896819365
22.0	-2.1222095842171624	0.7356669258052628
23.0	0.8102741224901794	-1.5326556864326828
23.0	0.5071908915920095	0.967766323226106
23.0	-1.3174650140821826	0.5648893632065733
24.0	0.8206273339952592	-2.496367047881106
24.0	3.0879460509076027	0.9918247714200294
24.0	-1.3147626341752776	1.4015174973386666
24.0	-1.632016494382504	1.0306766008592843
24.0	-0.9617942563451466	-0.9276518217368488
25.0	1.3145767120790843	2.005803069450427
25.0	-2.3209474442780724	1.4588651609933794
25.0	-2.659100486931025	0.7895287185186807
25.0	-2.175783278035679	-0.2165435779604566
25.0	3.228736448224563	-3.7249776605628875
25.0	2.6125180489411224	-0.31267571043915554
26.0	-2.0021289848266624	0.16383386743256828
26.0	0.40557269140414826	-2.29741226625402
26.0	0.7306777551822912	-2.13254295089634
26.0	1.6961941205684827	0.355446447024692
26.0	0.7056283295703419	2.8494139800302687
26.0	-1.53594391189859	1.0612609226628082
27.0	-1.3211110386932865	1.4814454504293577
27.0	-1.5284083986683992	1.1464152990808025
27.0	0.360256170663383	-1.7304017622683132
27.0	2.489263266698311	-0.8974589872418666
28.0	3.7737684713290984	-1.594043704209063
28.0	-0.6090909298329673	2.0293068594220376
28.0	-3.1646775414961335	-0.43526315521298914
29.0	-0.37267080418936793	-0.7276808311066411
29.0	0.4483406561914221	0.1043436728439594
29.0	-0.07566985200206826	0.623337158262657
30.0	-1.9234110316916755	-3.3453636551305292
30.0	2.034581214945875	-1.1471140554567882
30.0	1.095402933056317	3.775898478941174
30.0	0.7049312545124069	3.3208184557845057
30.0	-1.9115043708229391	-2.604239224138293
31.0	0.015589253097736608	-0.030350055074927915
31.0	-0.0030457236155677224	0.017865613549020564
31.0	-0.012543529482161843	0.012484441525906418
32.0	5.662947200007633	-1.9258671795295381
32.0	0.29178614590667984	3.6054134162241347
32.0	-5.336365597588179	0.5575908777829188
32.0	-0.618367748326141	-2.237137114477528
33.0	-0.3465849521849141	2.271240731489626
33.0	-0.934865584992319	-0.45550991534561786
33.0	-0.9331833872803232	-0.5103025914662764
33.0	0.9622392424088146	-0.8055002099760474
33.0	1.2523946820487621	-0.4999280147016272
34.0	2.8270964642999226	1.9743191181646889
34.0	-1.6504627444002944	0.19360655900586662
34.0	-1.1766337198996284	-2.1679256771705555
35.0	-0.7640345589890046	2.136906863780162
35.0	-3.688227291674873	1.7958582093266424
35.0	3.11005395885401	-4.025419694860669
35.0	1.34220789180987	0.09265462175385633
36.0	-4.088466489945756	1.269837138376361
36.0	2.7011514298212824	-1.8734624129278672
36.0	3.0946860704547894	-1.1983424973740184
36.0	-1.707371010330336	1.8019677719255283
37.0	-1.9158684450286496	-1.8925840357215211
37.0	5.809347552961906	3.3350922997954364
37.0	4.994002697087783	3.2539367640240013
37.0	-4.466767590183652	-2.2765340552003206
37.0	-4.420714214837391	-2.419910972897603
38.0	-0.05247999059794435	0.1497305549864549
38.0	0.05132869355307391	-0.2642212917083118
38.0	0.0011512970448934621	0.11449073672183499
39.0	0.2511279832216406	-0.8578817258422438
39.0	0.43264707246174183	0.5786913186110333
39.0	0.34557375356378894	0.6741764021014448
39.0	-0.39559518645011904	0.10843142141516778
39.0	-0.6337536227970768	-0.5034174162854608
40.0	-0.3308655625062801	-0.554740375701307
40.0	0.3390571857883359	-0.43897403293904275
40.0	0.4435689988262773	0.8440644150462292
40.0	0.2567885975606405	0.718621036248385
40.0	-0.7085492196689445	-0.5689710426542304
41.0	-2.3220460418677296	-3.299962220643191
41.0	0.12443223499994249	-2.526121815082506
41.0	6.332949472373438	7.323925667606355
41.0	-0.8749603963635969	1.8871006542724333
41.0	-3.2603752691420427	-3.3849422861530725
42.0	3.286109732322168	0.6758996451158966
42.0	-1.233562335190724	1.694644610440312
42.0	-2.0525473971314443	-2.370544255556209
43.0	-2.1209567632068747	-0.2364108421281857
43.0	3.030179479039153	-1.8167176645806713
43.0	0.48820027225368307	0.9979626435377688
43.0	-1.3974229880859788	1.0551658631711025
44.0	-1.0616532307825772	2.013001119930909
44.0	-1.8296925533970445	1.4808314221383116
44.0	2.8913457841796335	-3.4938325420692133
45.0	-2.0001202772203683	-4.320943670680633
45.0	1.7715736358908383	-4.352836749572605
45.0	2.706797394024676	2.769291391364802
45.0	2.6117394123173865	3.245582361277509
45.0	-2.0317019124566054	3.435971791038507
45.0	-3.058288252555968	-0.7770651234275945
46.0	0.032149673144542354	-1.793475418919605
46.0	0.9715068209924196	-2.4145569452686244
46.0	0.458284016163493	2.2413204920954857
46.0	-1.4619405103004646	1.966711872092741
47.0	1.5563448358496295	1.6076445356785454
47.0	-1.0456816006021266	1.0215384046267584
47.0	-2.282911152272848	-1.2624537231169788
47.0	1.7722479170253167	-1.3667292171883172
48.0	-0.7325188669856335	0.8810896088182446
48.0	-1.7379036124979286	-0.4164828776482514
48.0	1.1101950714663569	-1.3021349057437275
48.0	1.360227408017217	0.837528174573752
49.0	-0.2580013179303401	-1.3927976358522904
49.0	0.8757725120401351	-0.9404233700034201
49.0	0.4676413506075337	1.2989874180423766
49.0	-1.0854125447173184	1.034233587813322
50.0	-1.5920074750675903	1.9008570627918062
50.0	-2.102714931418324	-4.908988829909399
50.0	1.646611745193358	0.4952671953985108
50.0	2.0481106612925455	2.512864571719116
51.0	5.123384461785148	-3.0428634995663533
51.0	-1.1689909418683104	2.9452869505785064
51.0	-2.744166369320703	3.6476209226591676
51.0	-1.2102271505961384	-3.550044373671306
52.0	1.2735297771907401	-3.228174934535891
52.0	1.415555465525784	2.6331997515933514
52.0	0.5190275362540049	2.243703459306759
52.0	-3.20811277897054	-1.6487282763641755
53.0	3.020834531531215	-1.563120941329481
53.0	-0.7135687112190201	2.4061665312875
53.0	-2.6696611709795843	0.7436208093350601
53.0	-2.3927653281705616	0.2855614981310206
53.0	2.7551606788379583	-1.8722278974241002
54.0	-4.702083686920441	-10.642934469797265
54.0	-4.439414208739306	-10.4720339404217
54.0	9.85112563033407	10.408876702185854
54.0	6.470361489457775	10.432548148313334
54.0	-7.179989224132084	0.273543559719772
55.0	-4.491006922539467	2.25488750928239
55.0	3.157664926750684	-3.135232133092695
55.0	3.5204615232767362	-3.080340103438801
55.0	1.2792016464676603	1.3699686676142468
55.0	-3.466321173955622	2.5907160596348318
56.0	1.6073629404736132	-0.9936971569625919
56.0	-1.0076565277572878	2.651024856906225
56.0	-0.5997064127163109	-1.6573276999436362
57.0	-2.1110304327069924	-2.7789335064261005
57.0	-1.445545101720509	-3.4039609905648134
57.0	1.1924492883869953	0.63737968024079
57.0	1.4883281425960395	2.560101906890097
57.0	0.8757981034444898	2.9854129098600724
58.0	-0.4658385637851951	-0.26265833460664245
58.0	-0.348042317142428	-0.4351695217945341
58.0	0.8138808809276653	0.697827856401186
59.0	0.930266996716434	1.6029586029268095
59.0	-2.9687753899406357	0.3366725618399754
59.0	-0.0770899902225663	-1.9820097736587414
59.0	2.115598383446759	0.04237860889196945
60.0	-3.52823712268344	-1.923928993267044
60.0	3.048861015445356	-3.005186263643908
60.0	5.876008925975947	2.6390862373615858
60.0	1.8253506265685522	4.238881390211471
60.0	-3.599848110467467	-0.20323763650521806
60.0	-3.6221353348389336	-1.7456147341569275
61.0	2.4407124474843256	0.892865881886394
61.0	0.8406482948698041	2.5446715218623286
61.0	-3.2813607423541393	-3.4375374037487276
62.0	7.8197266300143955	3.0537882811108146
62.0	-1.0057885260382464	2.6297372927650122
62.0	-9.337585993829693	-1.5858453462013697
62.0	-8.171792655972235	-3.454068936104229
62.0	2.4825719535446136	-1.4285079192568282
62.0	8.21286859228114	0.7848966276865671
63.0	-0.631385205159181	7.081891406391377
63.0	-1.9984950098426433	-3.7083584184948526
63.0	2.6298802150018235	-3.373532987896528
64.0	-2.206802164915136	-3.9809644615182216
64.0	9.584566552556634	7.55697517896923
64.0	-3.0528848934300155	1.5740856804959305
64.0	-4.32487949421148	-5.150096397946921
65.0	0.4589010821795275	-0.4903355470542631
65.0	-0.402191752363287	0.8826810318781676
65.0	-0.05670932981620918	-0.3923454848239101
66.0	0.9953026146766532	-0.9336671774533276
66.0	-0.6556549424081466	1.0891052350347532
66.0	-0.3396476722685175	-0.15543805758140247
67.0	2.5171015728647066	0.14719802142837426
67.0	-1.6094419697378326	2.677472924362658
67.0	-2.7345980209712852	0.2015010108043226
67.0	1.8269384178443984	-3.0261719565953453
68.0	-1.3395483083167299	1.6557639510906779
68.0	-0.7612035359214502	-0.769373056850308
68.0	0.6042095513131142	-0.906840471196526
68.0	1.4965422929250716	0.020449576956175226
69.0	0.08630300775027443	0.5650519531872765
69.0	-0.47442020109755406	-0.3205809071969036
69.0	0.3881171933472597	-0.24447104599039757
70.0	2.3199590920612927	0.38150413024738067
70.0	-1.6448022640379127	0.46465763010308225
70.0	-0.6751568280233944	-0.8461617603504766
71.0	7.3318333048168824	-3.9931697219325697
71.0	5.86998768956671	-0.47533807978906173
71.0	-1.83937928053699	3.6345184531551133
71.0	-5.517409862651502	3.1904949575139745
71.0	-4.005356750355505	-0.42372421177725794
71.0	-1.8396751008396293	-1.9327813971701502
72.0	-0.5057528935637716	-0.7085128754116921
72.0	-0.07943277375962626	-0.7894863872778791
72.0	0.8008216360919957	0.46570956634977795
72.0	0.6376267229914006	0.7730718444690123
72.0	-0.8532626917600226	0.25921785187080143
73.0	-5.656524115296475	0.1888276404401143
73.0	2.264497037907389	-3.5766869702892223
73.0	3.3920270773890824	3.3878593298491095
74.0	-0.04057012191160346	2.8942428308317316
74.0	-2.6970002528508736	-2.232888638852688
74.0	1.0125196378735983	-1.311142761893347
74.0	1.7250507368888455	0.6497885699143341
75.0	1.6058652445206987	2.0006941891052654
75.0	-2.9946166657117743	2.1955834415455264
75.0	-0.49640787178152346	-2.594678625437765
75.0	1.8851592929726249	-1.6015990052130131
76.0	-1.7504302260789895	0.05205489889818305
76.0	0.4934842317001839	-0.7400854687537383
76.0	1.2569459943788102	0.6880305698555043
77.0	-8.982172774146273	8.783123666000263
77.0	-0.6726881735552366	-6.548463478093134
77.0	4.326139756785539	-5.067265697565216
77.0	5.330510457303266	-3.722764889384976
77.0	4.429636240671269	-1.3217354171376812
77.0	-4.431425507058513	7.877105816180726
78.0	0.35918576235484606	0.20124763924222233
78.0	-0.5775721972857097	0.23517087721646845
78.0	0.21838643493088755	-0.4364185164586756
79.0	2.0900605763546283	2.367727588452259
79.0	1.0405739174843887	2.7499379988489214
79.0	-4.261053650409436	-2.7704377021947386
79.0	1.1304191565703996	-2.3472278851064474
80.0	0.13916333272538003	-2.1092771799914862
80.0	0.6529831785612208	-2.0511523257187236
80.0	1.9156189134505328	0.2890019068420825
80.0	1.8597032960397601	0.474113174086882
80.0	-0.9628859648729602	1.756335459081364
80.0	-3.604582755903908	1.6409789656998692
81.0	-0.22188147696682622	0.1686266142762045
81.0	-0.03136593221374944	-0.24618523161760522
81.0	0.25324740918057587	0.0775586173413806
82.0	-0.5648779700127367	4.314059914493641
82.0	-1.559666034492484	3.9788000903548486
82.0	-2.154233928866928	0.031537559704109666
82.0	0.8289784981450782	-7.307857059897251
82.0	3.2691106578619618	-5.163152585927926
82.0	0.18068877736506625	4.146612081272584
83.0	-1.7554908150936865	2.0800823538416244
83.0	-1.3338705134106363	-6.877411516063973
83.0	-0.39118796920482846	-7.5773992345354335
83.0	1.6115388850980166	-2.0602132524228307
83.0	1.8690104126111364	14.4349416491806
84.0	4.81374207761649	1.37921414631861
84.0	0.3373779339441411	1.1667427018644416
84.0	-2.297409305235278	-0.29065784998344496
84.0	-2.8537107063253506	-2.2552989981996117
85.0	-0.22781594889093926	0.455996290041013
85.0	0.12333278923623563	-0.4781907499908815
85.0	0.10448315965470363	0.02219445994986854
86.0	-4.465448043275288	-0.10017194053762653
86.0	2.1069809294597546	-3.101683963865958
86.0	3.125762738679221	-2.143076864162414
86.0	3.7282455632263187	2.0835094665677216
86.0	-4.49554118809	3.2614233019982897
87.0	-0.9097282553906182	-5.0012350362483176
87.0	5.9423510826595605	-2.707476300717367
87.0	0.7597667824639646	4.964040560279407
87.0	-5.792389609732903	2.744670776686279
88.0	0.15622358227122377	-0.48289810555746726
88.0	0.20213467854856174	-0.4985671460549755
88.0	0.040069980581207136	0.6054975862119467
88.0	-0.3304292669820259	0.48989328399970233
88.0	-0.06799897441892407	-0.11392561859920664
89.0	-0.4089463380445654	-2.645515308807237
89.0	1.3254471130435859	-2.177489100371454
89.0	2.4047159699202694	0.2560900622570972
89.0	-1.1343496522833616	3.437564697090617
89.0	-1.3803687280593426	3.3319016352271205
89.0	-0.806498364576592	-2.2025519853962034
90.0	-1.3613645722902104	2.550282288737199
90.0	-1.5930590426732756	1.6683724712047783
90.0	1.5092005782623972	-4.020043956007028
90.0	1.4452230367011019	-0.19861080393495542
91.0	17.479929980821435	-3.4339496058966072
91.0	21.39415765350717	6.532640794101932
91.0	-9.28878302336917	4.24551889366709
91.0	-14.936474894254776	-3.5670803770742
91.0	-14.64882971670466	-3.777129704798225
92.0	0.32770518148559896	1.2803363977356397
92.0	-0.6296096213617748	-0.16849745398868474
92.0	-0.13073769708758037	-0.728870811245196
92.0	0.4326421369637596	-0.38296813250174505
93.0	-0.519288810318027	-1.2484140098735965
93.0	0.9105233587327501	-0.5109654726129258
93.0	1.2595547069672872	0.17268879173665125
93.0	-0.3944774598985257	0.8150046709123111
93.0	-1.256311795483455	0.7716860198375711
94.0	1.2768564054209	1.9124782751106135
94.0	-0.6838721697669752	-0.7153542049087069
94.0	-0.5929842356539317	-1.1971240702019255
95.0	4.580718559523147	-0.1726928178469566
95.0	2.725449587745699	5.4508839609927255
95.0	-7.306168147268839	-5.278191143145768
96.0	-1.2025817696388965	-3.7957959274533737
96.0	3.692533621912324	6.308572967243869
96.0	-2.4899518522734194	-2.512777039790499
97.0	2.1051996533355464	0.792086148202829
97.0	-0.28630276286987977	2.429504938467128
97.0	-1.6469452415653867	-0.388495225439342
97.0	-1.0536445750268701	-1.4856142215752406
97.0	0.881692926126554	-1.347481639655357
98.0	0.9380026804144675	1.117463426132198
98.0	0.9017756008089763	1.2632952425237065
98.0	-1.6470862104662662	0.12349260418635824
98.0	-0.19269207075715528	-2.50425127284225
99.0	-2.6792585828330995	2.1859834972185745
99.0	-2.92895499509373	1.6494580690987548
99.0	2.503241756252178	-2.628087630594892
99.0	3.104971821674652	-1.2073539357224377
100.0	-0.009542449422843519	-0.16825173564387763
100.0	0.13250857803220445	-0.11998375983376756
100.0	-0.12296612860936802	0.28823549547764465
101.0	-3.8974106871177754	0.25051856019590624
101.0	-0.024916110443935848	-2.6725340272873623
101.0	1.4143633510396767	-0.6485186458405406
101.0	2.507963446522024	3.070534112932009
102.0	-0.14123746848629778	0.12169649957364889
102.0	-0.27642444558912177	0.022790781365885734
102.0	0.1685436748837855	-0.14846719034320532
102.0	0.2491182391916274	0.0039799094036832745
103.0	0.5375380306673885	-0.28580648419072824
103.0	-0.21167022108195377	0.8381140058076352
103.0	-0.32586780958541706	-0.5523075216169165
104.0	8.857282437624004	-0.7332675011459128
104.0	-0.5466035093691465	4.256353759652093
104.0	-9.705751142774165	4.87712965038412
104.0	-10.394051759718883	3.0850071528327065
104.0	2.830665078724221	-5.898468103894175
104.0	8.958458895513983	-5.586754957828827
105.0	1.4691675912400644	2.5538545235254517
105.0	1.4336842957072815	2.618545399522937
105.0	-4.333031076194539	-3.0335799136944916
105.0	1.430179189247193	-2.1388200093539043
106.0	-12.673389587700385	9.638522202993371
106.0	-18.759028339501974	1.5919295350914768
106.0	-9.857613164834216	-5.14347708713401
106.0	8.203277554003892	-6.23613503784356
106.0	15.226703235153792	-4.547071009476769
106.0	17.86005030287886	4.696231396369442
107.0	0.07996037401626213	3.1442623056994
107.0	-7.6356799968480935	6.229798200205388
107.0	-11.506591121860831	2.027907495040707
107.0	5.781639301598865	-5.207131865941251
107.0	5.9472074268702295	-5.118364097560414
107.0	7.333464016223501	-1.0764720374438546
108.0	2.1162262161217913	2.4209838940586637
108.0	0.8914137993795073	3.087715624956171
108.0	-4.832762634141362	-0.06530436226803889
108.0	-3.086244641551809	-7.561034604039322
108.0	2.635267517958256	-0.01578699731721079
108.0	2.2760997422336584	2.133426444609777
109.0	2.78259242097991	-2.6028156380347363
109.0	2.877952081497146	-2.464215094420032
109.0	-0.057064988289421734	2.614437910207685
109.0	-2.4679003568621143	2.1015619872483047
109.0	-3.1355791573255263	0.3510308349988072
110.0	-1.0116863087082004	3.381901442313504
110.0	-1.14264946569914	-2.1763880156780724
110.0	2.154335774407343	-1.205513426635416
111.0	3.949993369339001	0.9086569298098078
111.0	-3.2972382522027472	1.1456076504820398
111.0	-4.698511584385688	-0.8350471033891245
111.0	-1.0804470394863528	-1.5406325429220562
111.0	5.126203506735797	0.3214150660192738
112.0	2.0880759568331735	-1.2197059461600182
112.0	-1.1538087286716605	5.0369208084868635
112.0	-3.312778653763505	5.3873569535433745
112.0	0.4656897520361894	-4.3442712778726635
112.0	1.9128216735658028	-4.860300537997556
113.0	2.590726083766284	1.859646278148151
113.0	-2.8744074150618397	1.3887294185121712
113.0	-1.4364626104841165	-2.2449867179772793
113.0	1.720143941779675	-1.0033889786830714
114.0	0.28282677868176853	-0.5659539634085289
114.0	0.1331857515394205	0.6014476919260328
114.0	-0.41601253022119156	-0.035493728517483954
115.0	5.259452414230425	1.4968520324526695
115.0	0.49776101229025976	3.654781619833902
115.0	-1.8469383324487245	4.080414658417016
115.0	-5.456684636887852	-3.520020396704618
115.0	1.5464095428158884	-5.712027913998995
116.0	-3.4742300703905156	4.964903084225508
116.0	-3.636211057668726	-1.8531232148058134
116.0	2.7307770947087477	-4.330552153379394
116.0	3.4713131261511756	-3.8748287748994015
116.0	0.9083509071993183	5.0936010588591145
117.0	5.847045751719846	4.261038723433231
117.0	1.3238804402367792	9.675371837954202
117.0	-6.931982623971354	6.0650417789935815
117.0	-0.7087929918507235	-10.587905672778282
117.0	0.46984942386544554	-9.413546667602734
118.0	0.5457453987058192	4.06914048529332
118.0	-0.533798761586663	4.259519322377033
118.0	-0.894734277087205	1.9843160890705713
118.0	-0.40836180005452066	-3.451082069636449
118.0	0.5758238912610283	-3.658618410755667
118.0	0.7153255487615284	-3.2032754163488013
119.0	0.052307249468724504	3.566347455406594
119.0	-4.208799589319394	-2.4944704709314065
119.0	-3.2792027001147015	-5.633784548559953
119.0	1.6048838342135778	-2.7138042319573894
119.0	5.830811205751835	7.275711796042168
120.0	1.6536873509821437	0.5514873010927337
120.0	-0.20116472109155567	1.3844439341644894
120.0	-1.4525226298905913	-1.9359312352572076
121.0	6.423672991566406	1.5752163584500318
121.0	-0.7740588959092913	5.033981258359428
121.0	-7.909775572608083	1.4249315144475538
121.0	-1.6965163226087427	-5.43602018480644
121.0	3.9566777995597144	-2.5981089464506044
122.0	0.02860977754488493	1.6680987191385606
122.0	-2.9829522097446812	-2.180029445389363
122.0	1.452817590293949	-0.31135448832051554
122.0	1.5015248419058633	0.8232852145713421
123.0	-1.255979662248333	-0.6235253443072329
123.0	0.8108055181619103	0.03157046412551127
123.0	0.4196951145972547	0.24944718778290279
123.0	0.025479029489139476	0.34250769239880524
124.0	0.7211359036183055	-0.5721997496893538
124.0	0.726027800903607	0.5942709356823014
124.0	-0.7048013301496254	0.24276450118987034
124.0	-0.7423623743722667	-0.264835687182798
125.0	3.2742903866960025	-3.4420864426507705
125.0	3.2950239340089107	-0.03165559365465387
125.0	2.237339063586344	0.6733911387367539
125.0	-3.08099424195713	2.3591420556218625
125.0	-5.725659142334133	0.44120884194680304
126.0	5.280344354029127	-1.29198258845066
126.0	4.093285202776211	2.430101847174753
126.0	-2.040385547300829	2.322737723046332
126.0	-4.691695396279428	0.3430709253933452
126.0	-2.6415486132250376	-3.803927907163799
127.0	5.462437508719983	-6.633048032292132
127.0	6.597992893177722	-6.144037969114866
127.0	2.84919070338011	-0.9141063833262262
127.0	-7.460142608128317	6.968404217840758
127.0	-7.449478497149469	6.722788166892459
128.0	-0.6473965711827667	0.9190129354443923
128.0	-0.19891045634981888	-0.6567751672237333
128.0	0.3396224729539888	-0.4395432428839637
128.0	0.506684554578579	0.17730547466329102
129.0	2.867211431159666	1.8583195969689066
129.0	-7.036346714187318	8.595345397636484
129.0	1.1441911862918905	-4.67030834593819
129.0	3.0249440967357186	-5.783356648667201
130.0	-0.6506963074551523	-0.179153748145778
130.0	0.39790913592117616	-0.8433601551634559
130.0	0.8105373670468051	0.5803480086368975
130.0	-0.5577501955128398	0.4421658946723271
131.0	1.8851599419392389	0.036366393332584304
131.0	1.5611737668992622	2.3660024740617156
131.0	-3.446333708838516	-2.4023688673943013
132.0	-0.8086027750888911	-5.741519698194467
132.0	1.0989322271754025	1.0696149328268063
132.0	1.0483054879550344	1.473528444065636
132.0	-1.3386349400415436	3.1983763213020215
133.0	-1.8885996854683593	-0.28302205512727524
133.0	-1.561202550395617	-1.1699881856220815
133.0	0.13572599314339676	-0.8783230874967114
133.0	2.2916314862741816	0.6148468502783937
133.0	2.604534431434053	1.0690421881245802
133.0	-1.58208967498765	0.6474442898431255
134.0	0.07126525990194153	-0.4747748716276381
134.0	0.2762498919183613	-0.059882630070326355
134.0	-0.34751515182027165	0.5346575016979705
135.0	3.8590419632300725	6.3647054656337465
135.0	-4.436090589722729	7.772196261466847
135.0	-2.927831292750465	-7.785332145191893
135.0	3.5048799192431206	-6.351569581908705
136.0	1.360315220254337	-3.8769088761557633
136.0	1.9904389854664983	-1.885626331260751
136.0	2.092929891884806	-0.7898735523169474
136.0	-2.2275238659523877	3.872603620653002
136.0	-3.2161602316532707	2.6798051390804605
137.0	2.3932280234805146	0.3257282961255084
137.0	-0.4326501379417268	5.556685261786758
137.0	-2.310605117763157	5.059450527553937
137.0	0.11173138009401914	-5.504170345099067
137.0	0.23829585213032978	-5.437693740367114
138.0	0.7168491031408729	6.871480249213959
138.0	-2.67541474740138	-0.1918020953038041
138.0	-1.636659040009996	-3.1341318538437566
138.0	3.5952246842704616	-3.5455463000663863
139.0	-3.8517233572096505	0.8054303769362143
139.0	-3.5046827239944447	0.3935394533793533
139.0	2.0631309625643253	-1.4780196600149063
139.0	4.3710210208268965	-0.6897363906228159
139.0	0.9222540978128957	0.9687862203221731
140.0	6.440287601109773	4.453853335537245
140.0	-9.707099676602205	-3.4846783908951346
140.0	3.26681207549244	-0.9691749446420915
141.0	-5.218988597503386	0.9462474722954427
141.0	-2.979288398053541	-4.1674991231679295
141.0	1.7231695616615086	-5.082884421557606
141.0	5.0377882678766595	1.9876498989553932
141.0	1.4373191660187796	6.316486173474696
142.0	4.051983088422458	0.35944113537828426
142.0	3.4814244310980955	2.9036122066319763
142.0	-3.954940618771605	3.5012685005548687
142.0	-3.5784669007489414	-6.764321842565149
143.0	1.7075895686484883	-2.5286466580549676
143.0	0.8662325549849108	1.1841431957041002
143.0	-0.871455559304317	1.9025761892240716
143.0	-1.111387399010782	0.1864835932179548
143.0	-0.5909791653183198	-0.7445563200911341
144.0	3.5956606177714905	0.7332570687070125
144.0	-8.312450621702618	-0.15080787830404702
144.0	4.716790003931117	-0.5824491904029536
145.0	2.196712197964032	2.7291568836388
145.0	-2.695312674621938	-0.9206163220704473
145.0	0.4986004766579087	-1.808540561568351
146.0	-0.4154319265055467	-2.8129031423711512
146.0	2.8831162327174855	-1.7649581528416176
146.0	-0.2326169059814143	3.648690956093426
146.0	-2.235067400230495	0.9291703391193423
147.0	0.34005727797289426	2.170543193031194
147.0	-1.3993091637537738	2.451958708759295
147.0	-1.6501069013053198	2.0707961687291743
147.0	0.3950692953854248	-3.13880571786859
147.0	0.4734158492790094	-3.10723310757968
147.0	1.8408736424217234	-0.4472592450713845
148.0	0.40003848411195153	-1.4746666877183479
148.0	0.8663787876089101	0.06655993806523612
148.0	-0.44916068795316	0.7846605560325838
148.0	-0.470371673518638	0.7399137892362528
148.0	-0.34688491024907614	-0.11646759561573154
149.0	1.4880704685534207	-1.133906623350761
149.0	-0.18475170253969225	0.6078499968665847
149.0	-1.3033187660137424	0.5260566264841744
150.0	-2.3906272326833107	1.261622730659577
150.0	-2.4161442967847977	-1.7521874623182643
150.0	2.8673443449776252	-2.2440684021097104
150.0	3.0455749336274636	0.261181632032346
150.0	-1.106147749136972	2.473451501736014
151.0	-0.0760425128517204	-0.20342755158343606
151.0	-0.0018968933401870517	-0.2313691713637509
151.0	0.07793940619190744	0.4347967229471869
152.0	-0.7232432835264205	-0.5590163956847449
152.0	-0.15223033967059096	-0.4583844187399883
152.0	0.3324105089804983	-0.26227761269723376
152.0	0.6685587247921553	0.553978971319178
152.0	0.6097005047402366	0.580635766740809
152.0	-0.7351961153158666	0.14506368906204448
153.0	-4.100169082588543	-3.242819029205181
153.0	-0.986426709384107	-8.003508795149166
153.0	2.5612239408234934	-8.21402343726873
153.0	1.6156717775790823	9.379983378471495
153.0	0.9097000735700778	10.080367883151569
154.0	0.35861140462482394	14.266825354359684
154.0	-3.453630174551231	-4.9963230760054
154.0	0.22054645298095218	-12.30779364879215
154.0	1.5547620221233507	-12.743727619414237
154.0	1.3197102948220942	15.781018989852097
155.0	2.939846126823853	-1.4665435464129297
155.0	3.3623526633577643	2.772838811911444
155.0	0.23281755907388607	4.977306323355324
155.0	-3.4861678741967106	-1.5176963074620344
155.0	-3.0488484750587834	-4.765905281391734
156.0	-1.1473447055441781	0.8742863619517602
156.0	-0.7005258434232774	-2.3950238424634773
156.0	2.6879924753088047	0.18075379773052364
156.0	-0.8401219263413491	1.3399836827812386
157.0	-2.5670755555052973	-3.8368470548771434
157.0	3.0304135869630557	-5.780368643185239
157.0	-0.09590867341028364	4.755717791039685
157.0	-0.3674293580474818	4.861497907022693
158.0	-1.5359080137366778	-2.979642976714351
158.0	8.651848144208216	-2.328552071949054
158.0	13.422578449764886	3.0658055215898257
158.0	-9.161649958796106	2.846513118184454
158.0	-11.37686862144032	-0.6041235911109173
159.0	-2.8674455647270047	-1.4984218530846187
159.0	-0.9481789185751052	-3.1862750696866025
159.0	3.8982396215932376	-0.3457261374531901
159.0	2.0893637362545148	2.070513132048943
159.0	0.8464662460082979	3.0333125660422056
159.0	-3.018445120553935	-0.07340263786676643
160.0	-0.7976693547890892	0.34095460528287325
160.0	-0.8820111912085101	-0.5121103925147722
160.0	1.6796805459976045	0.17115578723188396
161.0	-2.8844216315927538	-1.0577897575051696
161.0	1.9871255027631702	-5.8589031502600735
161.0	3.3721914500621804	3.303937135653715
161.0	-2.47489532123259	3.6127557721115418
162.0	-2.1701329713000885	1.64076676771323
162.0	-0.7953456613527959	-3.7848591146486648
162.0	2.080269526132373	-0.42927769150189266
162.0	0.8852091065204897	2.57337003843735
163.0	-2.8958059368189306	-0.6929462649782261
163.0	2.739324611743434	-0.7189063623490933
163.0	0.15648132507549953	1.4118526273272796
164.0	4.987318422052407	-6.557738384960943
164.0	4.921007944526622	-1.7482991665990402
164.0	2.2143186300210926	2.9476954969750744
164.0	-0.4030402268941522	4.636982202842993
164.0	-3.0342318062033837	4.657063790170151
164.0	-5.592869614557541	-1.0436902577394067
164.0	-3.0925033489450104	-2.8920136806887995
165.0	3.655308770050868	2.288058635642539
165.0	-3.6282602015768246	-0.8764367336427594
165.0	-3.9301960795072723	-1.487210519645617
165.0	3.9031475110331812	0.07558861764586972
166.0	-1.7773959530933985	-0.17537951144578384
166.0	-1.7374954509137874	-0.8807785539874369
166.0	1.7758034595880134	0.426532227267438
166.0	1.7390879444191991	0.6296258381657724
167.0	1.5171180950723082	0.9726328708258805
167.0	1.4748173840319359	1.0852747512018728
167.0	-1.6853105236040253	-0.6481993371870836
167.0	-1.306624955500219	-1.40970828484067
168.0	0.48061104928748194	-0.40872655283241555
168.0	-0.20461896320689485	0.5378085089501343
168.0	-0.3332781891980582	0.589878572295931
168.0	0.05728610311747106	-0.7189605284136499
169.0	-0.5173436278238437	-1.123289894682746
169.0	0.7653342183639806	0.4914532841062272
169.0	-0.24799059054013164	0.6318366105765142
170.0	-3.062708680991008	-3.1548755871632563
170.0	1.9646205075558396	0.18718966187496325
170.0	1.0980881734351688	2.9676859252882912
171.0	5.516338655616041	5.085468211541553
171.0	5.179519630274672	5.552402161861485
171.0	0.3496413921876668	1.9594674270916446
171.0	-6.672630931809338	-5.574690003374179
171.0	-4.372868746269044	-7.02264779712052
172.0	3.291759338491342	-0.7446310515898433
172.0	-6.017215008972899	8.295352277965128
172.0	2.725455670481572	-7.55072122637528
173.0	0.1276369461723692	0.7346801270290053
173.0	-0.3980680704773269	-0.8509934066619353
173.0	0.06583938366956456	-0.5249821781455347
173.0	0.20459174063543992	0.6412954577784743
174.0	0.5299734543267316	-0.4027464948639616
174.0	0.5985189585696167	0.3476557757770633
174.0	-1.1284924128963816	0.05509071908692842
175.0	-0.2565753839570859	0.4403876821264725
175.0	-0.3038508404534466	-0.1360892760142246
175.0	0.5604262244105425	-0.30429840611222775
176.0	1.5241135496883667	-0.26092725668145317
176.0	-1.5787251317648905	1.7487870882619967
176.0	0.054611582076525916	-1.487859831580531
177.0	-0.3369332330572415	1.7545197764443785
177.0	-1.540008619304148	0.38194377153192616
177.0	-1.5318720314395433	0.001579890976696882
177.0	3.4088138838009563	-2.13804343895298
178.0	1.0239938454339947	-10.2243517956702
178.0	3.6176960978236474	4.7962220842991545
178.0	2.6905001553492904	5.054792847502426
178.0	-0.9075646095858011	4.519033451558502
178.0	-6.424625489021152	-4.145696587689861
179.0	-4.931197738204747	0.024344720441141755
179.0	11.543349260387787	-2.856004453914971
179.0	-1.9743782420858988	1.5141852104851987
179.0	-4.6377732800971545	1.3174745229885974
180.0	0.7548600102690645	0.04182735291286294
180.0	0.49170967588865017	0.5597676403460745
180.0	-0.8930946422871331	0.3260792099276615
180.0	-0.35347504387057666	-0.9276742031866304
181.0	-0.5619302708143825	-0.7854483095766639
181.0	2.5951194359502288	-1.0035884366257484
181.0	-2.0331891651358522	1.789036746202427
182.0	-2.5949488029816496	-0.22606117943021647
182.0	0.35714381268724543	-2.5373691309581843
182.0	1.2674795911916346	-1.89935647704411
182.0	0.7064092455743815	2.297707502827623
182.0	0.2639161535284178	2.3650792846049224
183.0	-2.3059110164662795	0.9856014405088163
183.0	2.40011133254318	-2.9486195193991396
183.0	1.6393337628782263	0.3365011073698173
183.0	-1.7335340789551397	1.6265169715204966
184.0	2.7609542338976714	-1.572591059796848
184.0	2.8749750286028655	2.497304459941865
184.0	-0.5444698237880774	0.8368468821827407
184.0	-5.0914594387124605	-1.7615602823277505
185.0	-1.2202596269155095	-2.9015023581633113
185.0	2.2655202400849688	-3.7127842545936445
185.0	3.486854838698538	2.115160237830866
185.0	-1.8738366288288248	2.771788225238098
185.0	-2.658278823039179	1.7273381496879907
186.0	4.395581951601739	4.157643509099376
186.0	-1.035018317528031	2.4568898922489613
186.0	-4.4951155235522	-1.3227484846613307
186.0	-4.481568735798703	-3.121951848093236
186.0	5.616120625277198	-2.169833068593796
187.0	1.0207249078288192	0.11788318552058938
187.0	-0.45821361067383565	0.5364082869006273
187.0	-0.5625112971549795	-0.6542914724212108
188.0	0.15499946815545435	0.6574574417463092
188.0	-0.31742942504800487	-0.48421750373165073
188.0	0.16242995689253073	-0.1732399380146934
189.0	4.688180942931195	-2.527514392997011
189.0	-2.6480736331520167	2.124903726943739
189.0	-2.8993942425118866	2.0535979283756767
189.0	0.8592869327327014	-1.6509872623223767
190.0	-1.5555542486076592	1.8316137342101617
190.0	-2.017997724046831	0.2593892370531204
190.0	-0.53274125838441	-2.903370105519698
190.0	4.106293231038874	0.8123671342564294
191.0	0.06395365034017089	-2.154658081166346
191.0	0.9783394834057864	-2.278843787008153
191.0	1.0490212748858248	0.3096121969950893
191.0	0.8776812469071416	1.9318429516739772
191.0	-2.968995655538913	2.1920467195054596
192.0	4.868537002016539	-2.810375593854738
192.0	4.133105238740096	0.14167300778604644
192.0	-5.086712240259773	4.437361658874987
192.0	-5.919202736378597	4.464071783714246
192.0	-1.6944141434181421	-2.7366315708911815
192.0	3.6986868792998604	-3.49609928562935
193.0	1.2201849790492316	1.5245684211983734
193.0	-1.5053245665990678	0.1835130776620665
193.0	0.2851395875498362	-1.7080814988604398
194.0	2.306729949012136	1.4673601685283368
194.0	-1.516224099012519	0.5924956643941744
194.0	-1.6598054778626148	-2.0743006758563323
194.0	0.869299627863007	0.014444842933779385
195.0	1.4807544739402145	-1.0505065563674505
195.0	0.29105396766922065	3.042273613113174
195.0	-1.7718084416094495	-1.991767056745737
196.0	-2.3526322617454127	0.71613481176346
196.0	0.3459260626931756	-1.9616437215454607
196.0	1.5827731323663141	-0.12878999942158562
196.0	0.42393306668595077	1.3742989092035955
197.0	0.44100353737597614	-2.9180419110431304
197.0	1.1202820777127338	2.9725662881466133
197.0	-1.561285615088718	-0.05452437710349683
198.0	4.36341467948578	-4.730861730587027
198.0	4.3784845891309505	-4.649034586896403
198.0	4.046181193990064	-3.4361487852196984
198.0	-3.5588823459461523	5.819203721709434
198.0	-3.7598333081420066	5.081962249561148
198.0	-3.2736593181461515	2.692393727636884
198.0	-2.1957054903724487	-0.7775145962043183
199.0	8.697893830387464	-8.638802211777048
199.0	5.971969183689641	-4.2698686299093
199.0	-3.0345026907172485	4.677008065309971
199.0	-4.611366885570192	6.034743501086114
199.0	-5.548790043723579	5.8200937920793026
199.0	-6.234604967031721	5.295209266443079
199.0	4.759401572965648	-8.918383783232004
200.0	-1.2652479639212486	0.7794509167538985
200.0	0.7418714361611788	-0.5853944497014828
200.0	0.5233765277600699	-0.1940564670524159
201.0	3.6999702066074858	-3.8967817231931563
201.0	7.6454050371821936	-4.074733160126066
201.0	13.276675952909656	4.269236261012293
201.0	-10.799068259680723	4.554324771671646
201.0	-11.577691347992117	2.3764193566023386
201.0	-2.2452915890264906	-3.2284655059670464
202.0	0.32409239158518544	-0.2991078627536616
202.0	-0.0779254373963828	0.6833517243462084
202.0	-0.2461669541888326	-0.38424386159251567
203.0	6.1054294233986095	-6.2845557412225315
203.0	-2.246773445062822	10.299856132971279
203.0	-4.282588793827074	2.85696407038354
203.0	0.42393281549127226	-6.872264462132287
204.0	-3.1160818288618546	0.11021391954811809
204.0	2.7682388804147835	-0.959580865677802
204.0	2.7132263392796765	-0.4964668821981527
204.0	0.7385836612839215	0.8469572362873582
204.0	-3.1039670521165537	0.4988765920404878
205.0	-0.4554118607077604	0.6220716831683681
205.0	-0.6028666808018601	-1.1635510842076449
205.0	1.0582785415096274	0.5414794010392893
206.0	1.4089012679556343	-0.09828077400852664
206.0	-0.11099005546699492	1.398157147686828
206.0	-1.2282066363451467	0.9890826467720497
206.0	-0.0697045761434754	-2.288959020450315
207.0	-0.01922826505403793	0.02439965857267981
207.0	-0.004527612606794821	-0.01336047997372269
207.0	0.023755877660838035	-0.011039178598943928
208.0	1.4734924492267434	3.408160257212638
208.0	1.1829584578312105	3.701581856185052
208.0	-2.2620190340647754	-2.3854894526408303
208.0	-0.3944318729931833	-4.72425266075684
209.0	4.563940599439513	-0.45339508069964285
209.0	-5.2278027283794435	5.568813596100677
209.0	-4.111781594563952	-4.253621179620064
209.0	4.775643723503882	-0.8617973357809676
210.0	-2.148187723203756	-1.868974107376222
210.0	0.9551873891701864	-1.4778112220592987
210.0	1.0196930727154028	0.9660406322082135
210.0	0.17330726131820107	2.3807446972273167
211.0	1.36794958831958	0.6004825286385309
211.0	0.0615980106111818	0.4695262254022763
211.0	-0.7983437671963349	-0.5077951132504189
211.0	-0.631203831734426	-0.5622136407903741
212.0	-2.6664826681250267	-0.930890724747903
212.0	0.9789364059563332	-0.826835053419542
212.0	1.6875462621686936	1.7577257781674451
213.0	-1.324039559826318	-0.3733585103348644
213.0	1.1148793501694023	-0.041700702327860134
213.0	0.20916020965690388	0.41505921266273293
214.0	-1.032598920455139	2.6318220379490085
214.0	-3.2436626793781347	1.6743750281076117
214.0	-0.16549213657545764	-2.9496525797337814
214.0	2.4721314228812723	-3.3649948962474188
214.0	2.0710457740914205	-0.041680988711245044
214.0	-0.10142346056395697	2.050131398635783
215.0	-0.3125396074505295	-0.635334311509461
215.0	0.5424973302470344	-0.15431472237325322
215.0	-0.22995772279648172	0.7896490338827526
216.0	-3.404341203532395	-0.9565461556719137
216.0	-1.8690730941468978	-2.9576005533985166
216.0	-1.7660752745610313	-2.982997534027044
216.0	2.989407511238291	0.30644172127168967
216.0	2.5135764949524386	2.9282648776691502
216.0	1.5365055660495945	3.662437644156649
217.0	2.391790497853054	1.3985358891468713
217.0	0.2863789441555191	1.8399665945187986
217.0	-5.003615774045829	-1.8462434142094977
217.0	2.325446332037291	-1.3922590694561714
218.0	4.846886889003075	-4.209332414982594
218.0	6.830413443905208	-0.30366110917109357
218.0	-5.7968171989029305	2.5314466435887106
218.0	-5.880483134005327	1.9815468805649779
219.0	-1.3430006974861022	4.291389674144056
219.0	-4.099932560704073	-1.7192159501009807
219.0	2.29392978105205	-3.9267086036668504
219.0	3.1490034771381445	1.354534879623786
220.0	-2.2800280599198546	-4.412464598022474
220.0	3.6143545928643723	3.11857060242253
220.0	-1.3343265329444898	1.2938939955999382
221.0	1.443887587057289	4.840642771325929
221.0	-9.111639928820246	-1.8396242312235411
221.0	6.123353591778283	-7.7014496526449605
221.0	1.5443987499846623	4.700431112542565
222.0	0.3314951475438766	4.13931722406012
222.0	-4.1595647600176315	2.348145110272199
222.0	-0.04703818330802986	-2.3894576802928733
222.0	0.3694015840736786	-2.4579569653544264
222.0	3.5057062117081297	-1.6400476886850521
223.0	-2.4705564182179445	1.9012941555543907
223.0	-0.4468432355264387	-1.941100148197605
223.0	1.0804088426888996	-1.92951337467522
223.0	1.1398672078911583	-1.8700439273148215
223.0	0.6971236031643251	3.8393632946332628
224.0	-4.240411699331174	-1.8706190717291855
224.0	3.2556579370087646	-3.3032482643092633
224.0	5.149384841524363	-0.02031797070647867
224.0	1.3811564226372788	3.966534344578685
224.0	-5.54578750183925	1.2276509621662837
225.0	-2.00408746772884	0.49733615544812054
225.0	-2.0453811802599575	0.43624430189216895
225.0	0.08905025018230488	-0.6288910962348341
225.0	3.9604183978064778	-0.30468936110542727
226.0	-0.5930146611568076	-1.0219197650201621
226.0	0.5584808835573815	0.4307020230800423
226.0	0.034533777599399504	0.5912177419401319
227.0	-1.5335555018070879	0.9992697517623826
227.0	0.7462548862017689	-1.6255951815134455
227.0	1.2314701751621138	-1.2008074641933433
227.0	-0.4441695595567807	1.8271328939444054
228.0	-0.3862985162720432	-0.5748712281576712
228.0	0.662385854216578	-0.5505664277941748
228.0	0.6507262921522311	-0.25058719116769773
228.0	-0.9268136300967708	1.3760248471194991
229.0	0.05996303140508523	-0.38504545688763314
229.0	0.028352426475806877	0.18444125349684234
229.0	-0.0883154578809139	0.20060420339075416
230.0	-3.560115076146984	1.418145737689454
230.0	-4.9353055575649885	-2.0442232756860452
230.0	-2.6859357622610096	-2.173411178508434
230.0	5.564954218351997	1.3236796527062038
230.0	5.616402177620975	1.475809063798838
231.0	3.927129278186771	3.75477033806881
231.0	3.2360171755850784	6.381035781774696
231.0	-3.494335365057601	-2.304885961473106
231.0	-2.8247284048199384	-4.563273094326795
231.0	-0.8440826838943021	-3.2676470640436133
232.0	0.003532336189328702	-0.020974956122732816
232.0	0.03421218098557092	0.03829509826909869
232.0	-0.037744517174890746	-0.017320142146376973
233.0	-1.9375062116243433	0.20142765517413216
233.0	-0.9527744700129354	-1.8592219454540224
233.0	2.890280681637254	1.6577942902798828
234.0	3.1151579064575894	0.377872533862636
234.0	-3.5281500319883774	0.8301548500886804
234.0	-2.8770691744669787	-1.2681476597232173
234.0	3.2900612999977716	0.060120275771913985
235.0	-0.3765460082241989	2.9187718196369543
235.0	-0.4015179210337382	-5.392808080730102
235.0	0.7780639292579421	2.474036261093153
236.0	-0.2902529367062451	0.16852824876992736
236.0	-0.46903429474091785	-0.20406501301650304
236.0	-0.28169121396062347	-0.692826313452798
236.0	1.040978445407817	0.7283630776993996
237.0	0.20294047081215824	-0.0886864924854909
237.0	0.0007067395848048088	0.1298797623795412
237.0	-0.20364721039699732	-0.04119326989408842
238.0	-0.07296049767864043	0.063183048092983
238.0	-0.15656409213982778	-0.07264323966355545
238.0	0.22952458981848314	0.009460191570566929
239.0	0.05442777290764276	-5.511145430603288
239.0	0.6222630781084572	-2.579512810389844
239.0	0.3835897061738106	3.4645820374241856
239.0	-1.0602805571899017	4.6260762035689575
240.0	-0.23248622900369556	0.09986266580417931
240.0	0.1483197492063319	-0.4293544545394513
240.0	0.08416647979736754	0.3294917887352439
241.0	-0.09244447242004783	-1.474040119916885
241.0	0.45088280422967086	-0.9853494085038877
241.0	0.3324146031184449	2.884548326023363
241.0	-0.6908529349280585	-0.42515879760261793
242.0	0.6777369890706687	-0.02864502766142677
242.0	-0.4995606824906271	0.758601567711382
242.0	-0.17817630658003475	-0.7299565400499534
243.0	-3.6283786953171426	3.485367722680509
243.0	-0.7846204696186931	-3.118338990666181
243.0	2.5605298645848107	-2.1823490041426936
243.0	1.852469300351036	1.815320272128377
244.0	1.062305163368285	0.3352984261253545
244.0	-0.6837050777639746	0.5306899634989111
244.0	-0.3786000856043104	-0.8659883896242655
245.0	0.20651138654361442	-0.08816802251150194
245.0	0.08156529947073224	0.1779701258446837
245.0	-0.28807668601433484	-0.08980210333318968
246.0	-0.015792359566554417	0.03778923236371518
246.0	-0.011322336233188244	-0.04245776760711295
246.0	0.02711469579974266	0.004668535243397766
247.0	0.8709179981787035	-0.36820546833455564
247.0	0.04438449980396727	0.9191174371332207
247.0	-0.9153024979826594	-0.5509119687986734
248.0	-6.658466614097103	-0.22072341983114596
248.0	5.7324844380574485	-3.1001164527748717
248.0	5.699678293206301	-1.4672292618987077
248.0	0.7977714690064274	2.1797869082840764
248.0	-5.571467586173054	2.6082822262206435
249.0	6.045167795985165	4.505947924726317
249.0	-3.208998580376777	3.933846496203915
249.0	-9.902709625736025	-6.5862748574947885
249.0	7.066540410127651	-1.8535195634354313
250.0	0.002738508929516577	4.897508540951932
250.0	-7.45271102071655	-5.140365434194177
250.0	1.7833758213225617	-3.629501409345025
250.0	5.6665966904644725	3.8723583025872537
251.0	-0.7684149023364114	-0.9369053707256494
251.0	1.145348847696776	0.45633040783392764
251.0	0.43018826347298256	1.4093226378322665
251.0	-0.8071222088334014	-0.9287476749405666
252.0	0.09826537881052741	-0.4974748051696729
252.0	0.5091486119853773	0.73532939814858
252.0	-0.2935062528087235	0.2956812525076255
252.0	-0.31390773798720784	-0.5335358454865422
253.0	0.006919925300316305	-0.02872496130179665
253.0	0.007650947005898088	0.021859720840646857
253.0	-0.014570872306200187	0.006865240461149473
254.0	-0.2839451890692799	0.24289665587361345
254.0	-0.2954818322035189	0.21904568312324865
254.0	0.12250818027019378	-0.42622625818553844
254.0	0.23620847137642884	-0.04949088824223367
254.0	0.22071036962621546	0.013774807430901164
255.0	4.148138022157661	-0.2088891584088214
255.0	3.421644071873565	1.2316432985223338
255.0	-0.04509512413844524	2.328958168266812
255.0	-7.524686969892771	-3.3517123083803426
256.0	-1.1058902974535116	-0.717424608739577
256.0	1.7221973874372227	-0.18675057667252384
256.0	-0.6163070899837307	0.9041751854120972
257.0	-0.3705343243037385	0.4288721013670371
257.0	0.10133065240567743	-0.39977220662363944
257.0	0.26920367189803707	-0.029099894743414442
258.0	1.3963962277432376	-1.541060872739948
258.0	-0.6003729503471451	4.377225886199307
258.0	-1.5038325788451243	-0.7045971298061535
258.0	0.7078093014490316	-2.1315678836532053
259.0	4.341999372684139	-0.15072794563483283
259.0	-0.5648018909541109	2.861144647075432
259.0	-4.524292456373664	1.6225325245571958
259.0	-3.055413197460774	-3.479531862606626
259.0	3.802508172104394	-0.8534173633911667
260.0	4.462058903666731	0.6663224850632482
260.0	-2.0138251124224147	0.2471750107713637
260.0	-2.4482337912443115	-0.9134974958345983
261.0	-1.4431992800229927	1.3453445422699328
261.0	-6.260787115878027	-5.34013730337477
261.0	-1.6854614254401767	-8.307415732398196
261.0	5.287645917548776	5.250939062842743
261.0	4.101801903792434	7.051269430660291
262.0	0.8338731471212987	-0.8234161597305786
262.0	1.0626780029320126	-0.6634560080267535
262.0	0.9834736346680393	-0.1769531153533303
262.0	-0.1187620009156221	0.9032607352105027
262.0	-2.761262783805743	0.7605645479001975
263.0	-4.440353839239911	5.056301947315263
263.0	-5.746567540839949	4.620326361233904
263.0	6.418097927500717	-12.37685827520228
263.0	2.747798715391423	-0.03071605246620823
263.0	1.0210247371877077	2.7309460191193287
264.0	-0.073250571587273	-0.21506357449700314
264.0	0.6568892312923452	-0.13013772722053976
264.0	-0.5836386597050722	0.34520130171754293
265.0	-3.97651973161094	15.229410830705593
265.0	-21.034145444447365	-9.587331190264479
265.0	10.32140192073855	-7.446604496777314
265.0	11.022554210183598	-4.480946271218823
265.0	3.666709045136159	6.285471127555019
266.0	-1.4191228880981617	0.6127762268803705
266.0	-1.3655754158953939	-0.9644212253897656
266.0	0.7905061164721008	-1.0921563785160193
266.0	1.1630822922828816	0.4055282841164544
266.0	0.8311098952385647	1.0382730929089736
267.0	0.032908984512498365	-1.65344887839582
267.0	2.532225753376524	0.4000406382045418
267.0	2.0864018569241862	1.8130980214827184
267.0	-3.2897616803340806	1.7113009520956426
267.0	-1.3617749144791107	-2.2709907333870505
268.0	-1.3083112308320872	-0.5448461759588477
268.0	-0.6845929920721061	-1.0879142470278298
268.0	0.5487294068319238	-1.2282933187525793
268.0	4.866421961172283	0.06204906743254694
268.0	-3.4222471450999987	2.799004674306686
269.0	0.010968229142025887	0.3532813251863594
269.0	-0.17739835131776385	-0.14231634769262058
269.0	0.16643012217576503	-0.21096497749372756
270.0	-2.802880731275289	-1.2563028301446337
270.0	3.37873732596105	0.6469632035929054
270.0	-0.5758565946857327	0.6093396265517425
271.0	-3.7909017392433473	4.3510647187123865
271.0	2.4304072266152015	-6.797706572397968
271.0	1.7645419146789656	-0.25223196140132437
271.0	-0.40404740205080547	2.6988738150869076
272.0	1.8547517542504501	-3.609651621913535
272.0	0.6771439795718984	2.5971120052529852
272.0	-2.531895733822321	1.0125396166605583
273.0	0.7866497482698724	1.3292359484970078
273.0	-0.6160665654058778	-0.48397244338767403
273.0	-0.1705831828639904	-0.8452635051093395
274.0	1.3856128869425297	2.291782952078161
274.0	-2.771806819693087	-0.7124118758253785
274.0	-1.1031896936825238	-2.28687770257316
274.0	2.4893836264330953	0.707506626320376
275.0	0.1337929480210433	0.7574592658351573
275.0	-0.36785021285860503	0.9547362017856554
275.0	-0.42933884523755894	0.827131782715264
275.0	0.3258717453914618	-1.2699204986305865
275.0	0.3375243646836619	-1.2694067517054455
276.0	0.06526571013949256	0.0028785770588453962
276.0	-0.028429910263412753	0.09073704465338427
276.0	-0.0368357998760798	-0.09361562171220957
277.0	8.267929241677264	-7.317435590588264
277.0	19.032330904218448	9.383816750284373
277.0	-11.484485225051783	5.473530473447984
277.0	-15.81577492084393	-7.539911633144096
278.0	0.7703364229974126	1.5409703186778887
278.0	-1.8326943890028642	2.7814217703163298
278.0	-2.8636816419005484	2.006140207262323
278.0	-2.8681526856479445	0.9482115302176792
278.0	3.2040122889844254	-3.707336285520678
278.0	3.5901800045694654	-3.5694075409534567
279.0	0.8293845142500665	-1.5913858714752045
279.0	1.1983906681068288	-1.4005313899799814
279.0	-0.2973033037136417	1.6711622656447518
279.0	-1.730471878643245	1.3207549958104394
280.0	-3.4122935546847635	0.29840548971293723
280.0	1.3415859991757597	-1.8304236478015647
280.0	2.070707555508985	1.5320181580886194
281.0	-0.6013112932778379	1.771234390984074
281.0	-0.6068591072823634	-1.7031055936827904
281.0	-0.13966638441568704	-1.6436388198316658
281.0	1.3478367849758766	1.5755100225303902
282.0	0.40184520897612264	0.0833275269047553
282.0	-0.4751383526148655	0.3610286486254288
282.0	0.07329314363871148	-0.44435617553017875
283.0	0.012038851939092227	0.17813138079298868
283.0	-0.04517481045108131	-0.035544679109564284
283.0	0.03313595851195304	-0.14258670168340662
284.0	0.1302306659922579	-0.2056312046466935
284.0	-0.005778286604816578	0.2827904303380875
284.0	-0.23016256738251187	0.13309689092997673
284.0	0.10571018799507698	-0.2102561166213738
285.0	3.2658341261718995	-0.0317593380285536
285.0	-3.8344198439911983	3.181776827113471
285.0	-3.6271656360577125	2.181788025504617
285.0	4.195751353877013	-5.331805514589549
286.0	-0.3351749178823179	-2.862036799061188
286.0	0.8791338004066399	-1.6280109354302046
286.0	0.6997538661066417	1.7432253535940059
286.0	-1.2437127486310011	2.7468223808973664
287.0	7.217129343259502	-1.0727377219841885
287.0	7.646444618617146	0.6908281084057105
287.0	-4.691934360158758	4.594700111827622
287.0	-10.171639601717896	-4.212790498249141
288.0	-2.3314100670304763	-3.425645761618725
288.0	0.9487068930629527	-2.5136994335500162
288.0	1.6762388014267393	3.027597121520162
288.0	-0.293535627459244	2.911748073648564
289.0	-0.14246992575162604	-0.3277652402155138
289.0	0.2959247657371991	0.361617620203524
289.0	-0.15345483998558226	-0.03385237998799941
290.0	0.7310136912667273	-2.9721039465990637
290.0	0.9967930762649577	-3.1093173763675352
290.0	1.0856947359924123	2.6455625374389853
290.0	-1.0311878456855346	3.332687696023551
290.0	-1.7823136578385297	0.10317108950404319
291.0	1.728445696289952	2.26434075527095
291.0	-0.8758121183178897	1.787466135540662
291.0	-2.5764177604322165	-1.695783952764135
291.0	1.7237841824601223	-2.356022938047446
292.0	0.0973460361917569	0.08334567443148636
292.0	-0.3019577753014371	-0.030824146458872843
292.0	0.20461173910968017	-0.052521527972613516
293.0	1.926765543968312	0.47377065085117054
293.0	1.6916207268054688	1.6936063347647738
293.0	-1.7708815405827105	-0.7018282640023424
293.0	-1.8475047301910688	-1.465548721613588
294.0	-0.39008263286874184	1.2806683186120689
294.0	-0.260009322388026	-0.3546164544592987
294.0	0.6500919552567735	-0.9260518641527831
295.0	-1.1536171796464276	2.327429168346626
295.0	-1.8936604824564698	2.060977946828636
295.0	1.545139248925649	-3.5871243500504435
295.0	1.7079307762944285	-3.046346560585607
295.0	-0.2057923631171834	2.2450637954607746
296.0	-2.2377452348150575	1.6072894073874013
296.0	3.6700349476609935	-4.13261061330099
296.0	-1.4322897128459364	2.525321205913596
297.0	-6.843569859303879	7.594977434401515
297.0	-7.365667745905019	7.258359544044193
297.0	-7.570775041414051	3.121139839537652
297.0	12.691949058869364	-12.033472602762451
297.0	9.088063587753611	-5.941004215220904
298.0	-0.5589461741592014	15.891287042019874
298.0	-2.015175127218264	-16.19977784785061
298.0	-0.2510852177942967	-14.027893082046653
298.0	2.8252065191717635	14.33638388787739
299.0	-2.6847856984955016	0.8730946921542658
299.0	1.3000009666549832	-0.7274781337687989
299.0	1.3847847318405182	-0.14561655838546708
300.0	0.3024130436199885	-0.2976986774392083
300.0	-0.34682065089680264	0.5745500901890296
300.0	0.04440760727680381	-0.2768514127498333
301.0	2.1872340430320008	0.7470818522537974
301.0	-0.4032301346097389	1.3569035420007918
301.0	-1.7840039084222723	-2.1039853942545617
302.0	-0.059387860997746914	-0.17491749523786712
302.0	0.11082319189879082	0.07131665862204067
302.0	-0.05143533090103268	0.10360083661581775
303.0	-0.0680762975713933	0.25032861261431455
303.0	-0.3236737311873513	0.07316309204291102
303.0	-0.3830100362446722	-0.08385086559810603
303.0	0.774760065003416	-0.23964083905914516
304.0	-0.11324987132884	0.02993071804794373
304.0	-0.01555513978319087	-0.06093725896466439
304.0	0.1288050111120312	0.031006540916727762
305.0	-1.7340443340051566	0.7372035376480163
305.0	-1.9333626852229266	0.580634155837463
305.0	-2.0158858008756866	0.31306158952172647
305.0	2.789730181185295	-2.0704924423816586
305.0	2.8935626389185187	0.43959315937444077
306.0	0.36062911911459394	-0.7358327032909434
306.0	0.9543375889439307	0.6565716554610544
306.0	-0.6950947461158387	0.11335055438406806
306.0	-0.6198719619426778	-0.034089506554192586
307.0	-0.29747913615461913	-0.3005127499952892
307.0	0.8838605704761621	-0.06824444525615218
307.0	-0.5863814343215515	0.36875719525144646
308.0	-1.0383993442316606	-4.059606096699061
308.0	-0.8812473012682539	-4.121498224250092
308.0	0.9022804579563471	2.8436443955963506
308.0	0.8683144818025289	2.8875293432574525
308.0	0.14905170574098794	2.4499305820953228
309.0	6.5822825483548675	-5.17898805834419
309.0	9.745937937666268	1.9072007731990057
309.0	-0.8168370456451285	10.088120287444497
309.0	-10.905602212207008	-2.611400851741425
309.0	-4.605781228168998	-4.204932150557887
310.0	-1.4986307710667182	-0.6343590826234488
310.0	-2.2282098716621537	-2.777581166535915
310.0	-0.977989406956456	-2.0577592239448834
310.0	2.3920692163809387	2.6212779671959443
310.0	2.3127608333044196	2.848421505908261
311.0	5.391096768485256	-0.19059854698592946
311.0	-1.0209302593741716	3.802695760623645
311.0	-3.729290319731999	1.4595723990386387
311.0	-0.6408761893790748	-5.071669612676343
312.0	0.08657051593771095	-0.14570608550067635
312.0	0.13848668526235955	0.11415209616378587
312.0	-0.22505720120005718	0.03155398933686537
313.0	2.7552181338138237	3.4906278929772263
313.0	-3.2019237942966705	1.54627399439446
313.0	-0.22894538398118525	-2.1980608912897766
313.0	0.6756510444640454	-2.8388409960819048
314.0	0.3501796761236821	-0.07070158041179331
314.0	0.02022930497615569	0.3318527377366729
314.0	-0.3704089810998307	-0.2611511573248799
315.0	-7.113425678447359	-2.834027840646517
315.0	1.358343605606936	-5.792619349759085
315.0	5.539926468531744	2.757294251043534
315.0	4.897079070449043	3.304513265625403
315.0	-4.6819234661403755	2.564839673736674
316.0	0.6045251109379015	-0.22075354223180502
316.0	-0.44351200384935063	0.6489429076983492
316.0	-0.718578204723664	0.4428774511661502
316.0	0.05504524640698061	-0.3926879116195999
316.0	0.5025198512281391	-0.4783789050131797
317.0	-1.615460275097808	10.278867832379424
317.0	-4.348609772991071	-1.5984513584575142
317.0	-5.758734869938706	-13.459043136772937
317.0	6.644487512028413	-6.462872920837039
317.0	5.0783174059991785	11.241499583688071
318.0	2.1367731159007635	-0.34748437796128934
318.0	-1.0884123728253698	3.347627918185985
318.0	-2.4608793284579185	-1.4089602179831322
318.0	1.4125185853825126	-1.5911833222415712
319.0	1.0355923293658236	1.4281205860225805
319.0	-1.6919414727836402	-1.4655094855368018
319.0	0.6563491434178443	0.037388899514230585
320.0	3.0633863935407413	-2.3159837281630566
320.0	-3.053000204087115	4.8445439178068375
320.0	-3.459240731620837	3.331945199698996
320.0	3.448854542167213	-5.8605053893427765
321.0	1.1815102583279318	0.06660868234703485
321.0	0.12278845392957255	2.5688546160160564
321.0	-2.2016426136706913	-2.203015418899733
321.0	0.8973439014131942	-0.43244787946335805
322.0	1.6874563937155622	-1.6557591301953263
322.0	1.6510855217501195	-1.1738861880195015
322.0	-0.9572556303900254	3.345989395357445
322.0	-1.4687527417939947	3.2271552195779147
322.0	-2.5703989361418484	-2.0396644421331165
322.0	1.6578653928601352	-1.703834854587362
323.0	1.5835579993415811	-1.7516598839580946
323.0	2.017804385342931	-0.6754024920173485
323.0	-0.8341320634316688	2.9431679275030036
323.0	-2.455126534410882	1.3172064929979534
323.0	-0.31210378684197865	-1.8333120445255404
324.0	3.3771530230720055	2.162821629405304
324.0	1.515135376833419	1.5098971025211043
324.0	-7.478225283098571	-2.3847233255585776
324.0	2.5859368831931233	-1.2879954063678136
325.0	-1.9893416686914132	-0.14580519910474196
325.0	1.1086615327466198	-1.9944322356457003
325.0	0.8806801359448005	2.140237434750428
326.0	2.054596253872049	0.15515042973111504
326.0	-0.9514970150136579	0.34523250854475046
326.0	-1.1030992388584004	-0.5003829382758859
327.0	0.5051651465516701	-5.390442191275497
327.0	0.6612910908217092	-5.552858440263424
327.0	1.1236715771544874	3.9057234274454498
327.0	-2.2901278145278448	7.037577204093437
328.0	-0.5010636974614163	-0.3223309421354893
328.0	-0.3664352619334429	-0.5404696524245391
328.0	0.8674989593948559	0.8628005945600347
329.0	-0.15447933891307997	2.0735112037656127
329.0	-3.0241474648327427	-0.45995425808886753
329.0	1.5929093094376787	-2.0543246432946263
329.0	1.5857174943081462	0.44076769761792606
330.0	2.8879307004714065	4.544494033682264
330.0	1.75957697268483	4.850365077461604
330.0	-3.7154816491450604	-5.936439645941049
330.0	-3.7985747635256923	-6.932146159061445
330.0	2.866548739514495	3.4737266938586635
331.0	-6.4488455882945175	-2.7717012653165867
331.0	3.8506008554650135	0.6230586930820062
331.0	2.598244732829507	2.1486425722345945
332.0	-0.06660195483878664	2.0048540212275405
332.0	-2.1204518745349317	-1.7327610485303935
332.0	0.5105736510053913	-0.811411562427569
332.0	1.676480178368319	0.5393185897303977
333.0	2.4178420038788953	0.8592764046362003
333.0	2.6049367340241036	1.315817813654541
333.0	-2.5931872453468117	-0.638917968694305
333.0	-2.4295914925561997	-1.5361762495964206
334.0	1.49851154056386	1.4816020339139495
334.0	-0.1837716225615231	2.8172723557614003
334.0	-1.3147399180023194	-4.2988743896753725
335.0	-0.37351191986409565	-1.4822242314811864
335.0	0.289861612053235	-0.7642273882570063
335.0	1.5448835032200934	1.3364384066652584
335.0	-1.4612331954092574	0.9100132130729026
336.0	-4.453836852844846	5.385154230249704
336.0	-12.694629881859132	-3.971281103559009
336.0	1.2272654188550662	-5.278749596604932
336.0	7.95150160842247	-3.642338732198777
336.0	10.172804761499343	1.8594435138865046
336.0	-2.203105054072893	5.647771688226508
337.0	3.6670262593737757	-5.7556770798309085
337.0	10.450661844360885	-0.3291054005661063
337.0	-1.863516771036956	7.210898351462936
337.0	-5.319704189752441	1.3718348763595825
337.0	-6.934467142945194	-2.497950747425551
338.0	-0.0870362308305193	0.06787183354887527
338.0	-0.2645832890042137	-0.07532753080859869
338.0	0.3516195198347194	0.007455697259727472
339.0	2.0012767915768963	1.656956206829427
339.0	-2.0244640257659774	-0.20282923199217867
339.0	-1.8606714826537751	-1.0446765901045627
339.0	-0.29712439810501456	-0.675809097006319
339.0	2.180983114947905	0.2663587122736436
340.0	-2.245374859803217	3.6930213714530744
340.0	-1.849119193905537	-3.119057622091666
340.0	4.094494053708754	-0.5739637493614085
341.0	3.229538815929614	2.043957422576938
341.0	-8.38448470453945	3.454989978558346
341.0	-1.0421836549025323	-1.7966019174825048
341.0	1.321783673748607	-2.419775530949235
341.0	4.87534586976375	-1.282569952703571
342.0	-0.46141581641034446	1.5688752294235147
342.0	-0.47575189425553743	-0.36132996127454087
342.0	0.9371677106658819	-1.2075452681489738
343.0	5.674338962731468	-0.09476422795490512
343.0	-0.8335294827193459	4.158276518384725
343.0	-7.775470318974894	-1.0692816725645822
343.0	-2.678560661406667	-2.801307508339987
343.0	5.613221500369474	-0.192923109525274
344.0	0.46591718611661537	-1.1673443539432304
344.0	0.0666391233427592	1.7255934476923416
344.0	-0.5325563094593717	-0.5582490937491037
345.0	-4.4861143775612025	-7.49685588967121
345.0	4.24172086878756	5.41492594497019
345.0	4.314532575971808	5.834514781270264
345.0	-4.070139067198222	-3.7525848365692234
346.0	-0.6966430985498179	-0.4389907737982264
346.0	1.6999670976032726	-0.533511103932669
346.0	-1.0033239990534617	0.972501877730883
347.0	1.4640499421728423	-1.7016270146244317
347.0	2.7553601866771413	3.4314479955271935
347.0	-4.219410128849983	-1.7298209809027605
348.0	0.38250773183658704	5.418411171230833
348.0	-3.0404433958860495	-6.203018140856877
348.0	1.2375804113576616	-0.8435144043628345
348.0	1.420355252691826	1.6281213739888927
349.0	-0.11064006456830607	-3.9145451680017382
349.0	1.946950749376384	1.8566128095037129
349.0	-1.8363106848080681	2.0579323584980522
350.0	-0.03416549761069879	-2.773556003901984
350.0	4.340890048247027	1.6904181541481054
350.0	-2.336616632764612	4.44068985220686
350.0	-1.9701079178716951	-3.357552002453005
351.0	-1.7395097141346183	2.1193231036460225
351.0	0.23661263680584574	-3.1388632327651407
351.0	1.9603204228595075	-1.753646154445726
351.0	-0.4574233455307037	2.7731862835648515
352.0	-2.111138597733558	5.021606642860965
352.0	-6.976730460462839	-4.519742607646781
352.0	2.162248604324613	-5.313811192332092
352.0	6.925620453871779	4.811947157117913
353.0	-2.0508691323213424	-7.202995897118382
353.0	1.7923693863495898	4.886280676989126
353.0	0.25849974597176073	2.3167152201292693
354.0	-0.3074427953142863	0.4983588792330849
354.0	0.09343684334891898	-0.4789069144549104
354.0	0.2140059519653673	-0.01945196477817456
355.0	-1.5799917185504075	2.3405160053347585
355.0	-1.8755769942383635	2.3905281174981794
355.0	-0.42968355577406725	-1.2636680983190927
355.0	1.3690028076861092	-2.8535108679359364
355.0	2.5162494608767765	-0.6138651565779131
356.0	3.3957343532945568	-11.225810210390991
356.0	4.5651626663216405	6.70238289341286
356.0	0.07851000351176388	7.00884191832243
356.0	-8.039407023127968	-2.485414601344296
357.0	1.0158775043202954	-1.155686907898206
357.0	-0.17007209566994388	0.5605819836694964
357.0	-0.8458054086503506	0.5951049242287239
358.0	-5.23384362412611	3.2486020775140405
358.0	-3.7118947857900175	-0.7701268100607641
358.0	-0.4146823668107949	-6.790112690746401
358.0	7.032710131930307	-4.096749086040982
358.0	2.3277106447965354	8.408386509334075
359.0	3.07758848940996	0.7703137467518163
359.0	3.1172606369799594	1.9712449172881126
359.0	0.20592656469718407	2.6194432821706295
359.0	-3.2174692720841542	-2.6376962242323727
359.0	-3.1833064190029345	-2.723305721978202
360.0	0.14959354721173318	-1.0897190864513104
360.0	0.8511282254505466	-0.7415693591324898
360.0	-0.40237312722666935	1.2856635142582353
360.0	-0.5983486454356532	0.5456249313255931
361.0	6.616007661105124	-4.438655023806465
361.0	-3.126196646166944	2.8696250338712916
361.0	-3.4898110149381742	1.5690299899351863
362.0	2.4501864064154497	1.9255481903240936
362.0	-1.1653237062213961	0.6720561227511426
362.0	-1.2848627001940853	-2.597604313075232
363.0	0.9373762165367582	4.0720212948936965
363.0	-5.395693844810066	-5.702174608951672
363.0	2.2011983416225425	-3.4104677015803815
363.0	2.2571192866507555	5.040621015638341
364.0	1.339558421793314	4.774625242006217
364.0	-2.8752756380268045	-1.4858593843335148
364.0	-2.4022032987728044	-2.078172025700522
364.0	3.9379205150062635	-1.2105938319721878
365.0	3.3309030068966723	0.2271870832321176
365.0	1.2879647343278446	3.3956568568412724
365.0	-4.618867741224504	-3.6228439400734085
366.0	4.334194576618711	0.3432348103009682
366.0	-1.2652189181887035	5.245508791261995
366.0	-3.5828827378944035	-1.3587550000648907
366.0	0.5139070794644257	-4.229988601498052
367.0	-0.14076598505030505	0.29947489564898006
367.0	-0.07427860148673593	-0.154688573720018
367.0	0.21504458653703992	-0.14478632192895088
368.0	-1.5117936438865	-2.8622228372477205
368.0	4.871763261209882	-6.290239657572352
368.0	-1.3689426514836853	4.384765805932272
368.0	-1.9910269658397104	4.767696688887799
369.0	0.9027919828349562	5.0106810252472975
369.0	-1.5022363950601758	5.346770931457826
369.0	-2.16573490347529	-2.4825597439323555
369.0	1.554548757645837	-11.037621211754075
369.0	1.2106305580546797	3.1627289989813074
370.0	-0.9456050998431579	-0.8638800418647062
370.0	0.5113005342095809	-0.061302410845100574
370.0	0.4343045656335634	0.9251824527098015
371.0	1.4433861907848389	0.7263352165680282
371.0	-1.1981514557663464	0.4543020560828522
371.0	-0.24523473501847837	-1.1806372726508814
372.0	2.5708597212942905	-2.6251435778365853
372.0	-0.44560638898691524	2.141392425461776
372.0	-4.602279934746284	3.8876969000726933
372.0	2.4770266024388787	-3.403945747697894
373.0	0.4485018816224438	0.44267406622922706
373.0	-0.15604676359660638	0.529814213050072
373.0	-1.1594785327047423	-1.2628558190161827
373.0	0.8670234146789106	0.2903675397368878
374.0	1.6500181048395062	-0.6223053442708423
374.0	0.2744202200976685	1.9287026320841056
374.0	-2.4358192059243193	0.17232066715981886
374.0	0.5113808809871385	-1.4787179549731242
375.0	2.0875983363643162	1.422512156037405
375.0	1.2740290879244267	1.9741968732478985
375.0	-3.243860575166301	0.057904726860137
375.0	-0.11776684912241954	-3.454613756145413
376.0	-2.9818421204465637	4.453711268943155
376.0	-3.639457264815281	0.9160836029556217
376.0	-0.9901013418600241	-4.710757019965481
376.0	3.9676421822977863	-4.1830254437371
376.0	4.059243396461632	-1.6018689094165048
376.0	-0.4154848516375539	5.1258565012203245
377.0	0.022204572565863234	-0.682727970144098
377.0	0.09368658743385752	0.2887578400790654
377.0	-0.11589115999969071	0.3939701300650429
378.0	-1.6649046464838013	1.8820410343637157
378.0	-2.7190910544817393	0.3976570230779334
378.0	1.9142397215099156	-2.799849847727996
378.0	2.4697559794556643	0.5201517902863534
379.0	-2.282393427850903	3.305778911518237
379.0	-1.1850206617578949	-3.0880899297981
379.0	0.9688440612270907	-2.9988268500421458
379.0	2.4985700283817636	2.781137868322031
380.0	-0.287393407864755	1.3369519995682029
380.0	0.3084474376811418	-2.563885987769131
380.0	-0.021054029816393545	1.2269339882009302
381.0	-0.2582766773572774	-1.743828493039946
381.0	2.0936940794713963	-1.0174469114548785
381.0	-0.8843329263418274	1.3875883225254935
381.0	-0.9510844757722842	1.373687081969312
382.0	-1.660437632110815	-1.0424430188586165
382.0	0.9095773286070109	0.034745522683701985
382.0	0.9727447692861475	0.16794372464384483
382.0	-0.22188446578235066	0.8397537715310895
383.0	-3.2218669977832897	1.1341147192307361
383.0	0.9991442758680742	-1.1103719314591467
383.0	2.222722721915215	-0.02374278777160968
384.0	-0.9121557201713177	2.3549260863637946
384.0	-2.495439585910305	-1.5632096069376136
384.0	1.8245424408173032	-1.1511334374766344
384.0	1.5830528652643532	0.35941695805048673
385.0	2.6039250626787354	-3.2175352365833785
385.0	2.2867004027211117	-1.425103596049504
385.0	-1.427854706634584	2.379271385456385
385.0	-3.462770758765262	2.263367447176493
386.0	-0.4857547331403705	3.4003351323512403
386.0	-3.374986996856886	4.351722376096093
386.0	-4.383579732932134	1.2489653663375886
386.0	0.7776232757620799	-7.748003659218397
386.0	7.466698187167342	-1.253019215566541
387.0	0.03299812158654158	0.0007870513658835058
387.0	0.01456308744937581	0.011765382471123824
387.0	-0.047561209035908505	-0.012552433837025355
388.0	0.24032697010605775	-0.3351678962203675
388.0	0.0923995584000323	0.39136450467332135
388.0	-0.3327265285060739	-0.05619660845296587
389.0	-8.687806656498232	0.6584335755468012
389.0	-7.162210342018041	-0.3330997672202595
389.0	7.99862911835087	-7.392383935683855
389.0	11.7857837327067	-0.22713905171428211
389.0	1.5433816064397932	3.104774168048534
389.0	-5.477777458981074	4.189415011023067
390.0	0.23199575509731316	0.3038668557752436
390.0	-0.20323096671683713	0.11187221520930742
390.0	-0.13781869610855113	-0.18014289686432422
390.0	0.10905390772809519	-0.2355961741202272
391.0	0.06795484549935414	1.17972606373738
391.0	-0.9731536610742006	-0.45414356412969387
391.0	0.9051988155748423	-0.7255824996076997
392.0	-0.562963500793615	-1.7315651967776604
392.0	0.6600970630363489	-0.15701851050486357
392.0	-0.09713356224275166	1.8885837072825018
393.0	0.20639457510630815	0.27463264354743716
393.0	-0.3669835859775612	-0.19031804367716765
393.0	0.16058901087126154	-0.0843145998702829
394.0	-1.4641267018660513	0.3432923733939152
394.0	0.7447817797140275	-1.1282587079556723
394.0	0.7193449221520165	0.7849663345617449
395.0	0.5185885087127678	0.8729312781190218
395.0	-3.356430485322754	0.6141522965816804
395.0	-0.042308340850661916	-1.1128693224986987
395.0	2.2706374585716635	-1.2310205477401184
395.0	0.6095128588890417	0.8568062955380729
396.0	0.49709741037470484	1.458501480864032
396.0	-0.8604944108506123	2.2276805267642112
396.0	0.3633970004759076	-3.686182007628243
397.0	0.14885716366542223	-0.2061376790397334
397.0	0.2087715371226399	0.19234808760998537
397.0	-0.35762870078806214	0.013789591429748015
398.0	-2.7281701489791903	0.09387563912741421
398.0	2.3451653465100364	-2.2334777827632006
398.0	3.0506275641314415	2.0060282368508777
398.0	-2.6676227616622716	0.13357390678492057
399.0	0.8825570065202708	-0.19892099887021247
399.0	0.8590477972064481	-0.09882735119478143
399.0	-0.484051262546835	0.6077700073170087
399.0	-1.257553541179894	-0.3100216572520162
400.0	-0.4400378077707438	-0.35984283640134035
400.0	0.9677663019540644	0.3192664153077697
400.0	-0.5277284941833233	0.04057642109358035
401.0	14.470298955514611	-4.6323358732950135
401.0	16.50753614631176	2.541526986625547
401.0	-14.912485713141528	1.8091497354727357
401.0	-16.065349388684844	0.2816591511967325
402.0	0.8291571146155282	0.1830841578753445
402.0	-1.1942185024090237	0.32256760233336335
402.0	0.3650613877935294	-0.5056517602086863
403.0	1.1095265086856372	0.3130132875235414
403.0	-1.5053042832949268	0.605305696975609
403.0	0.3957777746092896	-0.9183189844991505
404.0	0.45137877189397807	1.312367917347276
404.0	-1.1180707468796205	-0.8416905319951574
404.0	0.6666919749856425	-0.4706773853521187
405.0	-2.470215665235492	-1.6968818556123486
405.0	1.9044367509594	-1.0135460578365936
405.0	2.1117367971161713	-0.2843236558178079
405.0	1.3369364761091407	1.3044222601106803
405.0	-2.8828943589492493	1.6903293091560383
406.0	-0.847751425169094	-0.4101752060671807
406.0	0.14655229949305548	-1.5877114076460443
406.0	0.7011991256760369	1.997886613713232
407.0	-2.4783418566745374	2.7927993655725647
407.0	1.3479339957122334	-1.7938353066315962
407.0	1.1304078609622905	-0.9989640589409732
408.0	0.3290759746457947	-0.13141513232021093
408.0	-0.19628866553148716	0.2163389783953044
408.0	-0.6251255318851747	0.23364286345738558
408.0	0.49233822277088357	-0.31856670953245186
409.0	-0.3781237996020747	1.240748924175144
409.0	-0.5904510285908022	0.769281552649026
409.0	-0.691022480063553	-0.2300642689286313
409.0	-0.3724620686923849	-1.8323906432278192
409.0	-0.14134569929102592	-1.9757278650201373
409.0	2.173405076239785	2.0281523003524
410.0	-0.1586681399320571	-0.14214342734875998
410.0	-0.03456597508806454	-0.4157930370546205
410.0	0.24586785164908945	0.14060310196786963
410.0	-0.05263373662896056	0.41733336243555524
411.0	0.4362254057038872	1.8866920449576248
411.0	0.31324113510943635	1.8684196663906607
411.0	-1.9624175385612315	-2.2510760173745434
411.0	1.2129509977478958	-1.5040356939737347
412.0	-0.11251903018205663	0.06793908250910427
412.0	-0.2013410219392031	-0.010818556958461916
412.0	0.3138600521212634	-0.05712052555065784
413.0	-2.6224120212360575	-2.409901853722768
413.0	-1.5370917555957424	-2.46452140095844
413.0	4.82327059870414	1.0022024087559627
413.0	3.0825072295846785	1.9916673851562803
413.0	-3.746274051457084	1.880553460768954
414.0	0.42770951889862285	-0.7328295793583374
414.0	0.24442996520788715	0.3898559517903869
414.0	-0.6721394841065229	0.34297362756795635
415.0	0.3752015988266564	0.4554230155256656
415.0	-0.3652249702499442	-0.1420673234495308
415.0	-0.009976628576725412	-0.3133556920761261
416.0	-2.4057008721093815	-3.9137037911300876
416.0	-1.7896511224529945	-3.86561807419697
416.0	2.9200217434418634	4.286790213351755
416.0	1.2753302511205202	3.4925316519753027
417.0	-0.7390093393148819	-0.25506362993898807
417.0	0.49850550000831145	-0.001476093001764999
417.0	0.24050383930656336	0.2565397229407538
418.0	-0.26964556196568024	6.505157571826816
418.0	-1.9092150907231518	-4.008143342206497
418.0	2.1788606526888388	-2.4970142296203206
419.0	1.308217534330472	-1.5549743150401838
419.0	2.0217873048257298	-0.7211695309430635
419.0	-3.330004839156198	2.2761438459832415
420.0	-0.1936862963450005	-0.6471048001592887
420.0	0.7297826144444312	0.21397657235065415
420.0	-0.5360963180994375	0.43312822780859017
421.0	0.2741814525039394	-0.001631760925137374
421.0	-0.1909570057891687	0.21571868908046826
421.0	-0.08322444671477061	-0.21408692815530528
422.0	1.4089173741567953	0.46709007251010115
422.0	1.141188572339302	0.7562287775106685
422.0	-2.057342228297488	0.08154318125878762
422.0	-0.492763718198586	-1.3048620312795363
423.0	5.634119519429794	0.09290899373400806
423.0	-0.03625877601902023	2.776395721906415
423.0	-5.597860743410795	-2.869304715640428
424.0	-0.9485843602117232	0.23749857267588415
424.0	0.03381930566084275	-0.7252976291114926
424.0	0.8191551159017632	-0.3810832954893207
424.0	0.09560993864911728	0.8688823519249292
425.0	-0.5856460186142779	0.9240969548592904
425.0	-0.8357567657965121	-0.10567690854349182
425.0	0.7576615779012014	-0.6419785633358897
425.0	0.6637412065095813	-0.1764414829798968
426.0	2.3668421197488994	7.428650328484622
426.0	-0.9967021636942343	10.715364236452483
426.0	-3.040809372008599	-7.914417796764793
426.0	1.6706694159539688	-10.229596768172318
427.0	4.47491301704242	5.443336482092854
427.0	-5.036142186063137	1.9110205824730266
427.0	-3.5973645626172077	-3.3048564451681326
427.0	-2.8736848010988614	-4.2267849179277075
427.0	7.032278532736776	0.17728429852997657
428.0	-0.26169117676175274	-0.37329751593191035
428.0	0.5938504729163406	0.21478090269935685
428.0	-0.3321592961546003	0.1585166132325378
429.0	1.6655068274483429	-0.7020937993489249
429.0	-0.9836250814782387	0.7128992283570994
429.0	-0.6818817459701094	-0.010805429008161392
430.0	0.27216113575500017	0.65664078195734
430.0	-0.6709719352978794	-0.015334479546781191
430.0	0.3988107995428857	-0.6413063024105733
431.0	-2.2250204827596543	-0.6803457978592331
431.0	-1.8303171044138886	-1.651361051762372
431.0	2.037165800658749	1.161295684044668
431.0	2.0181717865148068	1.1704111655769218
432.0	1.3088607713923355	-0.9779912915555933
432.0	0.873793790747944	1.1119717455829277
432.0	-2.1826545621403066	-0.13398045402732736
433.0	0.7845303784661084	4.233152078836772
433.0	-2.5300697385133106	-2.54936024266668
433.0	-1.2463183460449283	-3.8383986888071324
433.0	2.991857706092138	2.154606852637028
434.0	-0.31327596238480565	-1.4409863938216823
434.0	1.1770608574723576	-0.945163974072402
434.0	0.03387044421008717	1.2993277226042999
434.0	-0.8976553392976492	1.0868226452898018
435.0	0.0472752389538779	-0.03061440232154834
435.0	0.0035883005088551694	0.02987407754719911
435.0	-0.05086353946273957	0.0007403247743777928
436.0	-0.22037920770289524	-0.5891143671526419
436.0	-0.11073105778653619	-0.7150321201445606
436.0	0.3311102654894592	1.3041464872972117
437.0	-1.2612473623308713	1.7877422960487053
437.0	0.9937324159797033	-6.792437789507755
437.0	0.5585678743131676	2.403986713487262
437.0	-0.2910529279620075	2.6007087799717588
438.0	0.8877257732175305	-0.9505581318134176
438.0	1.4668728561018005	0.765437605546388
438.0	-1.6368153636024578	0.4753444939938613
438.0	-0.7177832657168822	-0.29022396772684256
439.0	0.023344430861256284	0.04342385700509448
439.0	-0.08392870973350784	-0.005079132857621847
439.0	0.06058427887226376	-0.03834472414749829
440.0	-0.017563996446159566	1.1669828019149595
440.0	-0.6716422785650981	-0.20860304635156207
440.0	0.2894529388786396	-0.7444886039777924
440.0	0.3997533361326421	-0.21389115158561356
441.0	-0.5393984153782252	0.343546346796757
441.0	0.14034752448442056	-0.3299774848355412
441.0	0.3990508908938046	-0.013568861961201596
442.0	-0.08821642616263588	-0.020954009328560015
442.0	0.008754844273859736	-0.05491361728962878
442.0	0.079461581888775	0.07586762661821124
443.0	1.339282509617404	-1.0629242620936952
443.0	-0.004931223834392514	0.7476584060327875
443.0	-1.3343512857830115	0.3152658560609075
444.0	1.4496862601877918	-1.5907790738718104
444.0	2.5991767210521854	-0.3552906453150312
444.0	-1.091037859133139	2.5198895941094275
444.0	-2.957825122106852	-0.5738198749225948
445.0	1.4872543786197427	-1.3896473986357278
445.0	-0.5490722189389955	0.9521537161654527
445.0	-0.9381821596807491	0.4374936824702892
446.0	0.8431290834057019	0.4210079936404662
446.0	0.050370141126421644	1.0372748016710631
446.0	-0.8934992245321263	-1.4582827953115405
447.0	-1.4514802900844948	2.9728857215115796
447.0	-0.9870765555196026	-0.6828798727550603
447.0	1.1597000756924964	-1.3393215071025892
447.0	1.2788567699116238	-0.9506843416539517
448.0	3.5105718053676536	2.3425298328406337
448.0	0.5443641944764362	2.2094873147970104
448.0	-3.6203298257597574	-0.36242277906011766
448.0	-0.43460617408431657	-4.189594368577528
449.0	0.202651047765134	0.10576717969477953
449.0	-0.03475227495466701	0.08172694586125359
449.0	-0.16789877281046228	-0.1874941255560042
450.0	-0.10059478938183719	0.06669728871550158
450.0	-0.01968488997599587	-0.1693051501964318
450.0	0.1763176198139666	0.022017831962064815
450.0	-0.05603794045612995	0.08059002951887916
451.0	-0.22772635442555686	0.05418934843316412
451.0	0.1553403483677669	-0.11002565348607958
451.0	0.07238600605778274	0.055836305052934194
452.0	1.7924724019727298	2.280660318369541
452.0	-0.7745912742354613	2.5208955158224056
452.0	-0.8126678362044545	-2.4851228334328983
452.0	-0.20521329153281692	-2.3164330007590936
453.0	0.08802188604191277	-0.39834376165782853
453.0	0.13918922943411013	-0.0046804906768769
453.0	-0.22721111547599815	0.40302425233469874
454.0	0.04006040641058595	-0.09656587024088356
454.0	0.02598271793577788	0.08834348724848509
454.0	-0.06604312434634967	0.008222382992412737
455.0	-0.24519022063429674	0.05026658281999337
455.0	-0.01283358375827736	-0.03608759609200564
455.0	0.10490503170828348	-0.03230824612822179
455.0	0.15311877268431678	0.01812925940025208
456.0	0.031699181113082064	0.054652841948176746
456.0	-0.023857688762014485	-0.0038764646934950704
456.0	-0.007841492351050007	-0.050776377254704005
457.0	-0.03696690421610423	-0.1060528849306019
457.0	0.05008233710200104	0.02163432407377064
457.0	-0.013115432885910567	0.08441856085683921
