# Supplementary material
Source: ML conference proceedings conference paper supplement (https://openaccess.thecvf.com/content/CVPR2021/html/Harel_Crossing_Cuts_Polygonal_CVPR_2021_paper.html)
Supplement: Supplementary file 2 [file Harel_Crossing_Cuts_Polygonal_CVPR_2021_supplemental.zip › Dataset/D4/p2/pieces.csv]

piece	x	y
0.0	-1.2080516090861182	-2.6339442618056426
0.0	2.1720123023284446	-0.2971460535285335
0.0	1.5413432797754463	3.6910853712383918
0.0	-2.505303973017788	-0.759995055904244
1.0	-1.2465889790167701	-2.4534233635068627
1.0	-0.39214116190127546	-2.110290509758166
1.0	1.8288597115672518	2.0630986318772786
1.0	-0.19012957064920266	2.500615241387751
2.0	3.3023787946486913	9.83706622704791
2.0	-1.8818499438915817	8.439393244048144
2.0	-5.833772488454711	0.6417755565535164
2.0	-5.5567063408200115	-0.45158718115934837
2.0	3.4073699946498026	-9.324107033718828
2.0	6.562579983867839	-9.142540812771399
3.0	-1.6121804128380886	-0.6467330451311568
3.0	-0.8974852111844647	-1.8702242022889837
3.0	1.0297792809387283	-2.300363010225821
3.0	1.5610887369987543	1.451038932329093
3.0	1.216914594483308	1.9420800502949356
3.0	-1.2981169883982193	1.4242012750219808
4.0	-2.235910714951855	3.6411583656464828
4.0	-3.634139750890929	1.9485516766885367
4.0	1.583479080787381	-3.4742740308122757
4.0	4.28657138505541	-2.115436011522741
5.0	-3.3396272219048235	-1.1743226580206556
5.0	2.5504891147615947	-2.7370949383265297
5.0	3.4613530942333477	-1.1155286197559273
5.0	2.9484751945339838	0.3208533760500072
5.0	-2.5697442959048455	2.379606853528169
5.0	-3.050945885719259	2.326485986524982
6.0	5.1146977019546105	4.883661091285874
6.0	-1.713891458675848	-0.7498582142541816
6.0	-1.9040212959348617	-1.255450045103487
6.0	-1.4967849473439006	-2.878352831928219
7.0	-1.0787463375575284	-0.7573512323594396
7.0	0.7674799025682923	-1.5773047052807154
7.0	1.6535332053727476	-0.9949969038812361
7.0	1.8366932984524946	2.399946191482263
7.0	-3.1789600688359827	0.9297066500391186
8.0	-3.155660919479326	0.0522939936784661
8.0	-0.6163011372859528	-4.336165819106164
8.0	2.316510875439721	-2.6469320425990857
8.0	2.2357597966972156	1.9754870012512624
8.0	-0.7803086153716097	4.955316866775522
9.0	-0.5296984960987619	0.11828281049959416
9.0	-0.06363725937264254	-0.26682152228133393
9.0	0.5933357554714028	0.14853871178173197
10.0	-0.04558544140315206	0.2903084814676377
10.0	-0.21736452812543608	-0.24766238501680748
10.0	0.26294996952859934	-0.042646096450821444
11.0	0.7989029541434718	-5.0931128302888755
11.0	5.047264370935377	7.7435897280862225
11.0	-5.846167325078856	-2.650476897797359
12.0	0.041297988397304725	0.1317037978397259
12.0	-0.09998797670239051	-0.16752137325809058
12.0	0.058689988305085795	0.035817575418364694
13.0	1.9444813057716712	-3.2685919036687547
13.0	2.394225202038222	4.397146548198454
13.0	-3.000241642902701	3.20758632771107
13.0	-2.8657238108515184	-0.7442259272542269
13.0	1.5272589459442922	-3.591915044986588
14.0	-0.38144038994882207	-0.8540392909191008
14.0	1.3321637491586404	-0.09969581389966531
14.0	0.10121395744061584	1.205482140966221
14.0	-1.0519373166504313	-0.2517470361474613
15.0	6.043215741374195	6.481766716990763
15.0	5.018676670718055	7.360477944186517
15.0	-5.852944977411055	3.5852420910302936
15.0	-5.665605526569157	-4.454863792630607
15.0	-2.315972750733335	-6.302546011477131
15.0	2.7726308426213055	-6.670076948099885
16.0	1.2857282708808724	1.733247668593963
16.0	-1.9576105992953394	0.9092088367687774
16.0	-2.483541847933005	-1.1050866742371248
16.0	3.155424176347498	-1.5373698311256512
17.0	-0.07704740455926681	-0.6532628935587729
17.0	0.6487436355642189	0.4725845264409786
17.0	-0.24187213432728563	0.6052535926397997
17.0	-0.32982409667764334	-0.4245752255219941
18.0	-9.530121742045427	7.711529777470247
18.0	-9.57567692363383	7.641363735616648
18.0	-0.4772432880717128	-5.195023405133308
18.0	13.100710952655332	-8.022225406437375
18.0	6.482331001095653	-2.1356447015161573
19.0	5.352498501604045	1.4256471484326818
19.0	-0.7550981479060492	2.748248741424418
19.0	-4.439823713673028	1.8050285159259103
19.0	-1.7977588300693106	-2.9776917202909803
19.0	1.6401821900443347	-3.0012326854919946
20.0	-0.4054080097556972	-1.0361397820932214
20.0	1.124116056889831	0.010082717796883522
20.0	-0.7187080471341484	1.0260570642963336
21.0	-4.317210100863743	-3.5194405791301175
21.0	2.1759944321389377	-5.318463923622666
21.0	6.480584427736524	0.23092782934367115
21.0	6.7234715130521465	2.659547959365681
21.0	-4.387618389051212	3.7091478132156506
21.0	-6.675221883012649	2.2382809008277795
22.0	3.168955869981691	-3.37541069517484
22.0	2.1634980390182137	-0.6664302264222974
22.0	-3.1448458958390484	5.964545247945162
22.0	-3.676431330445782	2.2044077546035963
22.0	1.4888233172849112	-4.127112080951646
23.0	-0.10549515932006481	-5.249332122537757
23.0	0.18312151855145697	-5.341490582921099
23.0	1.2363060551083493	-3.766297858926725
23.0	-0.40153587633636345	7.277058061166928
23.0	-0.9123965380033736	7.0800625032186435
24.0	-3.672880830566185	1.314264395665504
24.0	3.430968196924687	-3.021124621594023
24.0	0.24191263364148197	1.706860225928531
25.0	0.6198253860249332	1.5570308350683968
25.0	-0.6043484404305375	0.10587342425916003
25.0	-0.015476945594402977	-1.6629042593275498
26.0	3.4423096236654827	5.997131812296287
26.0	0.6271715986383262	6.623014376595037
26.0	-5.588563243471167	4.420267333680467
26.0	-3.7288430382387157	-6.365298830294519
26.0	-1.6203649518269279	-7.202756774290425
26.0	6.868290011233003	-3.4723579179868485
27.0	-0.11853166549527426	0.3221351817382013
27.0	-0.5248175194116459	-0.4757438473648158
27.0	0.6433491849068884	0.15360866562661377
28.0	-0.1484114056056226	0.34801091721390454
28.0	-0.87803508831212	-0.8606588256015241
28.0	1.0264464939177578	0.512647908387615
29.0	-1.380360749960523	0.4564853419637958
29.0	-1.2498083158097062	-0.13911012188202165
29.0	1.0404338165228617	-0.4513909264113185
29.0	1.5897352492473886	0.1340157063295253
30.0	-1.998464089892136	-1.4336682859690475
30.0	0.2603917470376097	-1.4848901532386174
30.0	2.892553629849821	1.391259194153086
30.0	-1.154481286995353	1.527299245054573
31.0	0.34083180731226326	-0.7509715277812578
31.0	0.6351453477149578	0.8304725333103935
31.0	-0.9759771550272147	-0.07950100552916689
32.0	0.1220021786609392	0.33014750531337833
32.0	-0.42637692137033373	-0.4257915856646709
32.0	0.30437474270940873	0.09564408035129252
33.0	0.12576656912189788	2.027802001259018
33.0	-4.031082411718597	-4.766551818393242
33.0	2.1144931811430037	0.710690723363055
33.0	1.7908226614536955	2.028059093771169
34.0	0.41437903811440496	1.029429953612922
34.0	-1.4013789675820103	-1.323081759196835
34.0	0.9869999294676172	0.29365180558390236
35.0	0.3233817542104192	2.2010507991937476
35.0	-2.2580617925149866	0.6009408577733826
35.0	-2.334434546587694	-0.35478033603600906
35.0	1.5414469322481141	-2.200331421039809
35.0	2.7276676526441337	-0.24687989989131442
36.0	1.0695047232069366	-1.9288873837720284
36.0	2.567389761088738	3.648523702793753
36.0	-3.636894484295675	-1.7196363190217248
37.0	0.15199635782499712	0.2316570794148565
37.0	-0.2607680414591698	0.11681534079786005
37.0	0.1087716836341686	-0.3484724202127029
38.0	-1.0982487419392644	0.820215216763509
38.0	-1.1962627660177882	0.4705792723341342
38.0	-1.1172508856501526	0.2380048334992892
38.0	0.5956476044025063	-1.3807233885613288
38.0	0.7907673920821799	-1.4503529239091024
38.0	2.025347397122522	1.3022769898735305
39.0	3.5600645829747988	3.0380887400492504
39.0	-3.6284293669837835	-0.5557507397884363
39.0	-3.202504451431592	-0.9899626150670373
39.0	3.2708692354405624	-1.4923753851937926
40.0	-3.5101712621080168	-0.7332000352370496
40.0	4.908294188775846	-0.4867003498119242
40.0	-1.398122926667836	1.2199003850489696
41.0	-0.1292922353766505	7.5461145294809615
41.0	-0.2907032161726035	7.530935027518362
41.0	-3.468502415158601	-0.6178295702582717
41.0	-1.2021364760849593	-4.957038537233401
41.0	5.090634342792785	-9.502181449507608
42.0	-0.4890426160022865	-0.8127343282981858
42.0	0.6832871140937778	-0.4665725323949439
42.0	-0.1942444980914788	1.2793068606931364
43.0	-4.781814078011736	2.243960975706469
43.0	-3.233619697245151	-2.022655621346627
43.0	4.617845289715769	-1.2038547113097475
43.0	3.3975884855411302	0.9825493569499144
44.0	7.875723292872844	5.135939169832612
44.0	-9.505706686335222	-3.533644282249422
44.0	-7.864385309887899	-5.03036757733853
44.0	9.494368703350311	3.428072689755315
45.0	2.1789725505385036	0.018593251000165734
45.0	-1.067633803887052	0.36239601910674624
45.0	-1.1113387466514575	-0.38098927010690825
46.0	1.068228267443493	-2.848354893578886
46.0	1.9327817358018928	-1.730589513586075
46.0	0.1480498808255133	2.901601669325714
46.0	-1.5871949600975692	1.8147133147143721
46.0	-1.5618649239733506	-0.13737057687514553
47.0	-1.2786127769563542	-0.14491842197848304
47.0	-0.38882687559233	-1.4016108660089148
47.0	1.525658329927337	-0.17979560993517807
47.0	0.14178132262133003	1.7263248979225365
48.0	-0.6903015146828426	-0.9907927442570453
48.0	-0.45361240298415273	-1.3510953345516385
48.0	0.7431056554077864	1.0312892479589741
48.0	0.40080826225921795	1.310598830849723
49.0	-3.0241965076779427	1.0634928106691712
49.0	0.05651424027460472	-1.7338578767766908
49.0	2.9676822674033403	0.6703650661075227
50.0	-0.09295856348585088	-0.09197698382051685
50.0	0.02922142775414071	-0.02399683813287966
50.0	0.06373713573171429	0.11597382195340229
51.0	-1.0944405089025488	-3.988210555694261
51.0	-0.941505314640765	-3.8861466705836922
51.0	1.4174606041745803	4.1144105572228415
51.0	0.6184852193687258	3.759946669055104
52.0	-1.3288336416101194	4.16459380698305
52.0	-1.8869954967780869	2.2828731222745633
52.0	-1.8816926991251308	1.7026092655074043
52.0	1.2825401448652785	-4.402396315184793
52.0	3.8149816926480264	-3.747679879580189
53.0	8.925016849417094	1.9429536726069088
53.0	-9.123547392590032	4.489246703410675
53.0	-7.6224879137461325	-1.7359426580084072
53.0	7.821018456919018	-4.696257718009197
54.0	3.6265271967511303	-0.37328175018895715
54.0	-0.35668798627750764	3.663561438706565
54.0	-4.617875167291904	-0.4770741778274319
54.0	1.348035956818276	-2.8132055106901808
55.0	-2.3429897468728726	0.585662171298411
55.0	2.143688924199864	-1.7132893335882546
55.0	3.8778445010758036	-2.0621707815561785
55.0	-1.1700295410802173	2.1914501986004358
55.0	-2.5085141373225794	0.9983477452456244
56.0	-1.0981267246186435	1.1151367957098892
56.0	-1.644862348969307	-0.09940960367469576
56.0	-1.5477209744820728	-1.2472196604121353
56.0	1.7613394791571884	-1.8315327260896195
56.0	2.5293705689128863	2.063025194466512
57.0	0.05132235096028049	-0.041152807534598976
57.0	0.05379034955338858	-0.03531553347765121
57.0	-0.016579888859945324	0.13161921186329958
57.0	-0.08853281165372581	-0.05515087085105618
58.0	0.44363546698418643	-0.15477019120183075
58.0	0.5695363683951047	-0.08106558051980611
58.0	-0.2680008198121198	0.4346800933669766
58.0	-0.7451710155671919	-0.19884432164534852
59.0	3.358779170555688	1.8082835802528159
59.0	0.6847313363532259	3.5779727655122144
59.0	-1.1198919725937229	1.2421517944980398
59.0	-1.8260843581024035	-0.9814691425461901
59.0	-1.355022436146013	-2.5650786353636263
59.0	0.25748825993329283	-3.0818603623532317
60.0	2.2941901068256407	0.04078935548811086
60.0	-0.45003012444001544	1.9574030146119823
60.0	-1.8441599823856292	-1.998192370100079
61.0	-3.234205011011782	1.8870604728192006
61.0	-1.2692070611323254	-1.3608755528189023
61.0	-0.4679553734642108	-1.534361277496977
61.0	2.5163692471277423	0.2878985994441582
61.0	2.4549981984805895	0.7202777580525229
62.0	7.553908958835676	7.964962211684674
62.0	4.469152101907577	11.08539281730653
62.0	-5.187133069778532	-3.9090681846402733
62.0	-5.057405857863986	-5.6166829244669625
62.0	-1.7785221331007683	-9.524603919883997
63.0	0.43525728000249947	-0.6464158263317278
63.0	2.5473830156157264	0.050047045710845506
63.0	-1.417714354113161	0.8761122723606879
63.0	-1.5649259415050505	-0.27974349173982116
64.0	2.393397204737012	1.9784305466231744
64.0	0.45174229073671723	4.073370290931842
64.0	0.26034992456900374	3.9409494077303435
64.0	-2.2947973380237108	0.7679194681984086
64.0	-3.3701516825579296	-7.708021092735724
64.0	2.5594596005388963	-3.052648620747963
65.0	5.632004309659941	1.8087531714285694
65.0	-12.336661022874484	10.556346656365065
65.0	-10.384429394598097	6.423111344860253
65.0	-1.6695673420800485	-3.603937574791496
65.0	3.1164910296030452	-6.172321328991967
65.0	5.690042152105025	-5.793695188191444
65.0	9.952120268184597	-3.2182570806789372
66.0	0.492752285601061	1.0996479221143947
66.0	-1.6082224706366004	-0.23806473477593648
66.0	0.20650911950251827	-0.894154969217623
66.0	0.908961065533009	0.032571781879155826
67.0	6.87401574796302	-9.868879912009891
67.0	5.926594541778219	1.5669490048307138
67.0	-1.7385256136075733	7.07930859345654
67.0	-4.16597208917461	5.332097798996364
67.0	-4.316814355049949	-0.9647987304146941
67.0	-2.5792982319091773	-3.1446767548590184
68.0	-3.1587710708323073	2.8759062966044477
68.0	-5.812372260492687	-4.966314703986452
68.0	1.375492416350704	-2.452302766202481
68.0	1.7111614539694728	-1.7069034891523622
68.0	3.4088426609425295	2.36905884840352
68.0	2.4756468000623033	3.880555814333411
69.0	-0.12849175779169578	1.6091618786808783
69.0	-0.11865536061294668	-1.4078708824787292
69.0	0.2513218079977833	-1.8747559839324293
69.0	-0.004174689593140643	1.6734649877302767
70.0	1.0012411873080735	-2.793874354591341
70.0	0.857764149251931	2.338603856516222
70.0	-0.17187696527883078	2.2366714038059925
70.0	-1.6543968091551742	0.780856005643515
70.0	-0.032731562126021796	-2.5622569113744076
71.0	1.5100222083814723	4.1120867240783525
71.0	-5.965963069726088	-1.1009382980268494
71.0	0.6741437882157393	-3.7829690969031287
71.0	3.781797073128882	0.7718206708516389
72.0	1.5611068287947965	-0.5119713747013145
72.0	-0.5088738107111039	0.9066221176352703
72.0	-2.687453423385181	0.2372549347205446
72.0	1.635220405301478	-0.6319056776544769
73.0	2.2773460286654603	-0.383890614720394
73.0	-0.39238940147604506	1.9991792024438146
73.0	-3.3804789866239675	3.0092630570863363
73.0	1.4955223594345606	-4.624551644809744
74.0	4.025276241902608	-5.368838827176891
74.0	0.04448431342508874	2.505534599223455
74.0	-1.418671905568767	4.081672512390928
74.0	-2.6510886497589716	-1.2183682844374828
75.0	-0.39043424649520103	-0.4408151432089958
75.0	0.726601953176408	-0.4075499978466998
75.0	-0.33616770668120655	0.8483651410556814
76.0	-6.83266843364207	2.9668654896401723
76.0	-4.402326948446059	-6.236183022926674
76.0	11.234995382088165	3.2693175332865216
77.0	1.8142074355847018	-4.0419923456588585
77.0	2.31989241951005	1.6872668080584081
77.0	-4.134099855094747	2.354725537600455
78.0	-0.8021812157685271	-1.1778370961559295
78.0	1.5456791215572205	1.300313523000045
78.0	-0.7434979057886523	-0.12247642684412864
79.0	0.49547774343357176	-0.6543876227023628
79.0	0.3048090692828568	0.5104290472677907
79.0	-0.800286812716408	0.14395857543459306
80.0	3.581030626997468	-0.6653496897084706
80.0	2.729361954743377	0.7871956432756266
80.0	-3.1803388455684796	0.17482438268552186
80.0	-3.1300537361723713	-0.2966703362527361
81.0	-1.6188801530513017	-0.1209549636596241
81.0	2.3744077411447977	-1.33209897531096
81.0	0.678126043937783	1.2994915637909634
81.0	-1.433653632031287	0.153562375179639
82.0	0.015545764177426417	0.06346113267973108
82.0	-0.16395955315970587	0.04368252563415218
82.0	-0.015111105405024545	-0.05668551903940783
82.0	0.16352489438730694	-0.050458139274477405
83.0	-0.45304471427112436	0.4819671343675143
83.0	0.07520507080614537	-0.5509072515914116
83.0	0.3778396434649731	0.06894011722388915
84.0	-0.42070701475946615	-0.7116946979669978
84.0	1.2453460515966146	0.9988267662759581
84.0	-0.8246390368371436	-0.28713206830895505
85.0	4.349375318541235	5.471554858561262
85.0	4.211170849379189	6.518894282957973
85.0	-5.984562462994251	-5.3412551316958
85.0	-6.135155734535665	-6.392609297722284
85.0	3.559172029609472	-0.256584712101114
86.0	1.4911303149185713	2.880512277557264
86.0	0.8766054306038653	3.7881451998887976
86.0	-2.8381526028202817	-2.7495923956788926
86.0	0.470416857297815	-3.9190650817671577
87.0	3.7370230006681084	-0.9889950191322525
87.0	-1.2278945503699785	1.8889599706961324
87.0	-3.184168835723918	0.25849962796078235
87.0	0.675040385425784	-1.1584645795246553
88.0	-2.488045025295717	3.7071209780046823
88.0	-0.07531248325856509	-2.7575069053167605
88.0	2.563357508554282	-0.9496140726879435
89.0	5.14660417614163	1.793156817240269
89.0	1.0983928042034	3.974583174807604
89.0	-3.5770075300166386	-1.9159622744623983
89.0	-2.6679894503284074	-3.8517777175855095
90.0	0.5552036795628021	1.6731003728507794
90.0	-1.2553849660081298	1.7926001024002063
90.0	0.7001812864453334	-3.465700475250971
91.0	1.5011439450967912	-1.3119037359150465
91.0	-0.3216999179533372	1.0036742583057752
91.0	-0.8751976724043478	0.5025259955931236
91.0	-0.3042463547391053	-0.19429651798386646
92.0	1.994854274701118	1.4539306152201568
92.0	-3.8365314474851515	4.23024424413199
92.0	-5.4739301946368775	-2.791752140517515
92.0	3.3904807936020873	-3.2195748260817187
92.0	3.925126573818835	0.3271521072471175
93.0	0.7827748887352974	-0.1980260597251549
93.0	0.8805869310080401	0.9765891782892113
93.0	-0.9730655909496179	-0.13240693777267604
93.0	-0.6902962287937197	-0.6461561807913804
94.0	1.9097251250220477	-4.659100391514423
94.0	6.536532521437891	-1.478792985806678
94.0	6.448724090043908	-0.9786839653982202
94.0	4.256880274263582	5.2504461668512885
94.0	-6.8917461362538965	7.780210470585523
94.0	-9.975067173648753	-0.0801541617827759
94.0	-2.2850487008647447	-5.833925132934687
95.0	-1.7472871572896065	4.957017446310868
95.0	0.15990451843678222	-4.925876305755249
95.0	1.9635607253280691	-4.45030048599824
95.0	-0.3761780864752454	4.419159345442622
96.0	-0.015137781536297426	-0.04432082544740827
96.0	0.1235065361712101	0.003942617094844961
96.0	-0.10836875463491517	0.04037820835254215
97.0	-5.139567055617249	1.3373803955693453
97.0	-4.917357067600484	1.0317703496208992
97.0	-2.6894636722322005	-0.6253446972123815
97.0	12.746387795449968	-1.743806047977837
98.0	-0.9715888298613459	1.5824966503679723
98.0	-3.4137590875636747	-1.6740892340005107
98.0	-1.2762992393302452	-3.569362626608405
98.0	3.312783019854465	1.358672776250658
98.0	2.348864136900783	2.302282433990244
99.0	-2.052230664869564	-1.5811842484680076
99.0	1.9423826580918522	0.3669258208315568
99.0	0.8734074340226845	0.9822518335708267
99.0	-0.763559427244961	0.232006594065608
100.0	-0.042732943568639006	-1.1808659406773605
100.0	1.552483986167958	1.72765752152399
100.0	-1.5097510425992973	-0.5467915808466235
101.0	0.5633234008085444	0.45798483921641875
101.0	-1.6740224330367166	-0.2543777906895687
101.0	0.45347894239935166	-0.4521913256814185
101.0	0.6572200898288075	0.2485842771545836
102.0	-0.3907549458421444	-1.2958606488076927
102.0	0.9769209128888694	-0.20005083434772142
102.0	0.9018066676400819	-0.014409591073357878
102.0	-0.5412193841099779	1.034124817935422
102.0	-0.9467532505767934	0.4761962562933428
103.0	-6.618767440407579	-3.7677762469305174
103.0	8.080221551031492	-2.965008295972845
103.0	4.301941599422622	3.2526617258975272
103.0	2.0355868862847624	5.182920329604893
103.0	-7.79898259633132	-1.7027975125990125
104.0	-2.02245730247602	-0.026418488539307616
104.0	2.6765531983532194	-1.6585875942650523
104.0	-0.6540958958772078	1.6850060828043498
105.0	-9.366128354217283	-7.023197009149295
105.0	-8.559666290174798	-8.263613071170177
105.0	-4.774056991986967	-8.288762497106562
105.0	8.617057271066088	4.457523015319451
105.0	8.37717339685811	4.997196279359393
105.0	3.228784347418296	7.190672763659782
105.0	2.4768366210365644	6.930180519087438
106.0	1.7448343198993226	-0.9770879898032079
106.0	1.8484140204075972	-0.7684657545066099
106.0	-1.5247250800612127	2.040994632231843
106.0	-1.6864929680531024	1.6521808778390035
106.0	-0.3820302921926444	-1.9476217657610688
107.0	-1.1959293849801638	3.0057348287277983
107.0	0.07469952242186195	-4.0132590154519265
107.0	0.455978899426701	-3.340286613458133
107.0	0.6652509631316008	4.347810800182261
108.0	-4.207043299086821	-3.8038352048772777
108.0	-3.2882449542577024	-6.3695457232215045
108.0	5.209838778679583	3.667874432091047
108.0	4.767703008884891	4.650363762052517
108.0	-2.4822535342198964	1.8551427339552022
109.0	-1.918540018185462	1.0781299031614313
109.0	2.9724734938587085	-4.404200015974318
109.0	0.8817447604120578	1.8826014446848658
109.0	-1.9356782360853135	1.443468668128045
110.0	1.0963281841195716	0.6839707773533044
110.0	-0.41762731489687627	0.1296344639208049
110.0	-0.6787008692227091	-0.8136052412741058
111.0	-0.08213170784568358	-1.0896057414713975
111.0	1.287947412296949	1.1250907598252673
111.0	-1.2058157044512652	-0.03548501835386941
112.0	3.567268473566613	-6.012104929606084
112.0	5.39646816712251	1.9112875961945686
112.0	-4.140528099342609	2.240721318631467
112.0	-4.823208541346515	1.8600960147800683
113.0	-1.6860499114895564	3.593823559081121
113.0	-11.429333051931803	0.5574017109109377
113.0	-15.12547321185862	-10.692854180904748
113.0	11.58285216308786	0.614898670440625
113.0	16.658004012192112	5.926730240472053
114.0	2.825870146385196	-0.9450348399203173
114.0	2.688102838011102	7.020814777007681
114.0	-6.552406966200612	1.155427112925166
114.0	1.0384339818043138	-7.231207050012532
115.0	5.874883989689304	2.4333670686776148
115.0	0.07322170510421633	4.45713471859235
115.0	-7.068075238645522	-1.7114135439624774
115.0	-4.956008870373884	-3.8399003285267623
115.0	6.075978414225895	-1.3391879147807255
116.0	-1.6405982859869335	2.3961361279311033
116.0	-3.809890960157443	-1.5356411105215049
116.0	4.998066562645161	-2.6496070848129354
116.0	0.45242268349921566	1.7891120674032939
117.0	-6.559581866083584	6.063205131214099
117.0	-8.985010986040946	5.742070958888369
117.0	0.2489367080637015	-11.365813419595701
117.0	7.748027346217662	-1.2281052116176892
117.0	7.547628797843162	0.7886425411109204
118.0	0.7671167839850668	-3.88613287802911
118.0	1.5168726644907784	-3.062090737672146
118.0	-0.01605443383644123	2.5395634516378944
118.0	-1.128007292491102	3.9563354265253636
118.0	-1.225657693711445	3.7074652096248593
118.0	0.08572997156312961	-3.2551404720868526
119.0	3.628767803368823	-1.6260201535176653
119.0	-1.5047339210756756	2.5303103136483927
119.0	-2.9393230430503117	1.2985647314754867
119.0	-2.8966220614089253	1.0965706472276548
119.0	3.7119112221660933	-3.2994255388338756
120.0	2.1396911308127993	-6.271615196237448
120.0	1.726781897635274	5.687857389725094
120.0	-5.521705849136005	7.288980510667737
120.0	1.6552328206879068	-6.705222704155367
121.0	-0.9378977703114405	-0.08105376274630005
121.0	-0.23505368368351864	-2.253218194055555
121.0	1.817210514642606	0.8374534844544291
121.0	-0.6442590606476477	1.4968184723474518
122.0	4.2204810711790675	-4.9667923252893145
122.0	4.399885170537136	-1.2266882341656067
122.0	-4.073014668532217	3.385292679637465
122.0	-4.547351573184004	2.8081878798174635
123.0	3.835120108874808	-0.13123175671745702
123.0	-1.9523179507210355	2.3380316794459475
123.0	-1.1939687343560046	-0.7113327688522737
123.0	-0.6888334237977717	-1.4954671538762458
124.0	-1.4942684927419205	-3.240353744730887
124.0	1.4453310356060638	-0.44192242802703297
124.0	0.04893745713586073	3.6822761727579234
125.0	-1.9437012185867304	-0.871677189013852
125.0	-0.9589276731700433	-1.9179968470292896
125.0	1.5484026340360004	0.5581065134094436
125.0	1.354226257720753	2.231567522633691
126.0	-13.792048041975566	-3.8237216159119747
126.0	-5.93196290846551	-6.2745908197234135
126.0	2.5016826338703697	-6.338216201269149
126.0	5.138771492326524	-4.06976594041867
126.0	10.04093584566589	8.541214775449113
126.0	2.04262097857829	11.96507980187409
127.0	-1.744631622250985	-1.1134847317615157
127.0	0.4113058034293831	-7.436986711322776
127.0	1.484299032174331	-7.3559426177587754
127.0	0.6732777040603092	8.341277206923076
127.0	-0.8242509174130338	7.565136853919949
128.0	-1.1723239683291031	-0.05691134920007446
128.0	-1.3633020412253136	-0.3575909996907103
128.0	1.004148151390828	-0.6112754516055535
128.0	1.0168098859129586	0.3714960664270266
128.0	0.5146679722506604	0.654281734069281
129.0	6.049976914626049	-6.6740087603012395
129.0	7.056579121125467	-5.64794640987733
129.0	2.6016538514358074	-1.2676334189233371
129.0	-7.833719925303537	7.231079085033353
129.0	-7.874489961883783	6.358509504068561
130.0	-5.448804189235688	0.26996099127707174
130.0	1.7199760969216915	-2.296286791492545
130.0	3.743001696543991	-1.012121583825337
130.0	-0.014173604229993475	3.0384473840408175
131.0	-0.7965364143993249	7.620948029555947
131.0	-8.592050865516697	8.708223800892913
131.0	-7.357218720054815	2.2696057208179843
131.0	3.2677165922298292	-11.462479924576673
131.0	8.776045133201336	-10.263858272192483
131.0	4.702044274539642	3.12756064550231
132.0	1.0556355305412002	2.2339285026189097
132.0	-1.5774952639657907	-0.502312211773889
132.0	-1.3691436432698594	-1.382444961104461
132.0	1.8910033766944803	-0.3491713297405337
133.0	1.1133981284295613	-2.754311593033661
133.0	3.2090616839399893	-1.1935126069034978
133.0	2.1770667283898706	1.01633042167691
133.0	-1.8844130998722108	6.020847260573245
133.0	-4.6151134408872005	-3.089353482313006
134.0	-2.712358982808733	-1.2752142530806587
134.0	4.639593106949827	-0.05493897794887814
134.0	4.036770159289788	2.0563939334028216
134.0	-2.8337961658377906	0.3287681615682364
134.0	-3.1302081175930945	-1.0550088639415498
135.0	0.9806578181395578	-1.9533095427426077
135.0	3.94468938981964	1.0692648545331753
135.0	-4.925347207959199	0.8840446882094333
136.0	4.223144820770358	-5.5417384506762275
136.0	4.338139865444093	-5.141702732468526
136.0	3.6126404236317997	-1.9322685081523105
136.0	-5.604560934219585	8.1414982899729
136.0	-6.5693641756266565	4.474211401324177
137.0	-0.5994279702920943	1.613768995268039
137.0	-2.312669498104619	-1.8107953908212542
137.0	2.9120974683966843	0.19702639555318702
138.0	0.19565566804736012	-0.5259947045779837
138.0	0.9358949180934242	-0.156797747983049
138.0	-1.1315505861407829	0.6827924525610185
139.0	0.35841452606980395	1.6647936578265727
139.0	-2.7084142070727215	-2.2449690303948673
139.0	2.349999681002911	0.5801753725682934
140.0	-1.2258603147360767	2.352969717397608
140.0	-1.5691788465227146	-0.841131022338534
140.0	-1.3496058778639675	-0.9783698895839859
140.0	1.8079990392827991	-0.6235272371615161
140.0	2.3366459998400124	0.09005843168640343
141.0	0.04015124575820589	-0.7655282522547957
141.0	0.2045790866257154	-0.6764042753674803
141.0	-0.24473033238391673	1.4419325276222608
142.0	0.6931903170022609	-0.39853310071289777
142.0	0.5210533694612189	0.32843826175368984
142.0	-0.7409955228658642	0.29587986826406837
142.0	-0.47324816359761224	-0.22578502930486674
143.0	-1.7458561189812591	1.3809705498101277
143.0	-1.9270959537936667	0.6569243289782707
143.0	0.30638047608344	-0.9535551791480291
143.0	3.3665715966914864	-1.0843396996403907
144.0	1.0540277754465759	2.6354340938971657
144.0	-1.1965037777147702	-0.9420078103660062
144.0	0.1424760022681924	-1.6934262835311735
145.0	-1.440108759307244	1.188014387035396
145.0	-2.301298480985945	-0.5677063928198794
145.0	-0.16162531111182898	-2.1592723457280565
145.0	1.5846848293873945	-1.5270207355130743
145.0	2.5942051623056117	1.2329999131637739
145.0	-0.27585744028799064	1.8329851738619034
146.0	-0.7039141291837884	0.40108438070632046
146.0	-0.3473380621554058	-0.4269868748110917
146.0	1.0512521913392017	0.025902494104768525
147.0	0.9949454062594313	-0.4202159721024319
147.0	0.908001535821643	0.6618742744264794
147.0	-0.61193301046119	0.5321899229283658
147.0	-1.2910139316198792	-0.773848225252412
148.0	1.8831865337740665	-6.731002899985169
148.0	3.5909238510621737	-1.6520555979983103
148.0	2.786879923173788	5.660494418156877
148.0	-8.260990308010024	2.722564079826638
149.0	-9.776973947747363	-3.8536047464485645
149.0	-8.610292527850108	-5.656917842790982
149.0	2.1244500341010304	-4.5423462491926205
149.0	7.830164197483846	-0.3440515060781295
149.0	9.757698566358139	5.098443595227829
149.0	3.3075739581335255	5.903337611445796
149.0	-4.632620280479093	3.395139137836665
150.0	-2.881958680038499	3.3797091936463053
150.0	-3.483391799477742	0.6897235221538957
150.0	2.6070720755448713	-3.0938815157369537
150.0	3.5273871611232304	-2.4624637725521747
150.0	0.23089124284817888	1.4869125724889058
151.0	-1.9217977265068473	10.736401075200723
151.0	-3.808434716986381	9.15096670699951
151.0	-7.179957639292962	-10.55548328015901
151.0	5.284016560652866	-9.276475084490954
151.0	7.626173522133357	-0.05540941755030637
152.0	-3.7948568775556746	4.358770641541749
152.0	-1.1266164642914145	-4.895068779045653
152.0	7.919209896745693	-5.39607752137039
152.0	-2.9977365548986215	5.932375658874281
153.0	2.5136153448314205	-1.3407910774030527
153.0	2.9518076377480367	-1.1534981033064988
153.0	-2.0753261194088273	5.279427989893167
153.0	-3.3900968631706263	-2.7851388091836498
154.0	-2.3962180583457817	4.9927280509831675
154.0	-0.37411919540865535	-4.22129949755715
154.0	3.8667792674480097	-5.009824965195514
154.0	-1.0964420136935458	4.2383964117695045
155.0	2.1896339940587275	-2.7692016338256176
155.0	-0.934168342603986	3.5747637607023153
155.0	-1.255465651454739	-0.8055621268766999
156.0	1.9071756541470641	0.8009009184752549
156.0	-1.4720314488214123	0.6395788488876621
156.0	-1.4234674338555215	-0.37410235266565545
156.0	0.9883232285298726	-1.0663774146972593
157.0	-3.5928278267232754	1.1019466283506318
157.0	-3.951680626809753	-1.6436231536313604
157.0	0.8486590281325695	-2.651008561094369
157.0	5.222320004413382	-1.6625397565699709
157.0	1.4735294209870569	4.855224842945064
158.0	7.118699857038775	4.472954104762833
158.0	-10.147861057683542	0.11650526167715469
158.0	3.029161200644749	-4.5894593664400265
159.0	1.0532276073870817	2.2404770220084753
159.0	0.5142192703622609	2.450129642093647
159.0	-1.140308562570493	-1.774776715283113
159.0	-0.4271383151788457	-2.9158299488190154
160.0	-4.143143460247466	-5.353898923939176
160.0	5.007632795527591	-7.653525991078389
160.0	-0.86448933528012	13.007424915017573
161.0	1.961266407025647	3.5833254043229323
161.0	-3.6446044769617294	1.2018121108383024
161.0	-1.128139259736968	-2.6453731321926406
161.0	2.811477329673057	-2.1397643829685977
162.0	-0.8138970139772108	-6.958876078403732
162.0	1.4374771929989825	0.6413263311207693
162.0	-0.6235801790217774	6.3175497472829445
163.0	-0.043402532481602404	-0.11614327063177868
163.0	0.07049413837422851	0.03825919130333099
163.0	-0.027091605892616326	0.0778840793284453
164.0	6.779717153064902	-0.17225878963155328
164.0	-1.8019725850714352	3.7833265197303243
164.0	-10.798555181915322	-1.3539917338983596
164.0	5.820810613921844	-2.2570759962004376
165.0	-10.708149873491942	-3.0837664182610736
165.0	-4.562446478025088	-3.281584573360547
165.0	10.549999945904787	0.3594919663851943
165.0	9.36863695849824	2.9115863316889685
165.0	6.218483509913597	6.039894934735713
165.0	-10.866524062799597	-2.9456222411882598
166.0	-0.9205420721819065	0.4797831002956347
166.0	0.4167590985606322	-0.7528631455725701
166.0	0.5037829736212794	0.27308004527691593
167.0	-0.4144283070335337	5.109313261283548
167.0	-1.2086926939668359	5.097777265409314
167.0	-0.005333112865955947	-6.837804575443041
167.0	0.5223285305058818	-6.643218464017071
167.0	1.1061255833604215	3.2739325127673067
168.0	3.553347592118704	-0.8508120955929813
168.0	3.7161034346904627	2.0082114805950004
168.0	-0.8245213171265569	1.1313446580765594
168.0	-3.5198922540841724	-0.8032688720428065
168.0	-2.925037455598362	-1.4854751710357972
169.0	-4.917586956107116	-0.7454252485016666
169.0	4.166912465581607	-2.697733149824436
169.0	5.860804647519152	0.8610658629922519
169.0	5.09128983064099	2.2541842990596375
169.0	-5.044716360510344	0.2949682647578281
169.0	-5.156703627124265	0.03293997151635175
170.0	-0.09225937591719559	-0.1881948784858005
170.0	0.26330254756799715	0.07857358930434907
170.0	-0.17104317165082283	0.10962128918145204
171.0	1.4296202192751997	-2.9358904324496606
171.0	1.9723680640896555	-0.32630997332253525
171.0	-2.679453502450911	5.9201032346337
171.0	-0.7225347809139452	-2.6579028288614963
172.0	0.08553168704177327	2.4337723370019533
172.0	-2.896397575624014	-4.742746869051919
172.0	1.8266738366075561	-0.6484532457724932
172.0	0.9841920519746803	2.9574277778224145
173.0	1.0119694722748172	-4.1384151307174015
173.0	4.56460586553295	0.220213816446734
173.0	-0.835579298141254	2.8752708960823865
173.0	-4.740996039666522	1.0429304181882701
174.0	-1.4542242682468471	0.34215810832653215
174.0	0.8489563690095665	-0.7529111841406786
174.0	0.6052678992372806	0.4107530758141464
175.0	-3.877724902760996	1.8829246384045548
175.0	-0.22705178541807403	-4.452147268984363
175.0	2.238807526251546	-6.310591257934455
175.0	4.2430704942648045	-2.6594444066344134
175.0	3.4504412647523344	1.975171349666721
175.0	-5.827542597089628	9.564086945481954
176.0	-3.145690886211809	1.3245478502858712
176.0	2.594940702319609	-2.5112345388570465
176.0	2.837796442711986	-2.5404289854023387
176.0	-2.2870462588198057	3.7271156739734925
177.0	0.31649196161371745	1.2412686628779546
177.0	0.2711775411853028	1.3218525396126428
177.0	-0.4064483292807741	-0.40396196735038087
177.0	-0.1812211735182253	-2.159159235140197
178.0	3.499311790064616	5.505917549298692
178.0	-1.1694348204061167	2.613597816183959
178.0	-2.910791290273399	-2.2846926146951447
178.0	-0.4748944059298122	-3.2209481027063065
178.0	1.0558087265447527	-2.61387464808121
179.0	0.771671664381354	-0.15337790095717033
179.0	-0.14890817287009314	1.45211328920613
179.0	-1.11275176534131	-0.7935518787281578
179.0	0.4899882738300607	-0.5051835095208209
180.0	-0.4277205168194805	-4.832737366390391
180.0	0.6946332739362175	-5.757324101290586
180.0	5.137200171082174	-7.751090076095214
180.0	5.087620186618587	-3.6850878382856793
180.0	-5.009802622353234	10.998163587508087
180.0	-5.481930492464236	11.028075794553784
181.0	2.875557366304386	-4.64732450787623
181.0	2.3041354534552796	1.2173835363657253
181.0	-4.264532446224326	6.687642297943865
181.0	-0.9151603735353127	-3.2577013264333443
182.0	-0.8885380735752153	0.3021735584890555
182.0	-1.0217042411532393	-0.8340266141837709
182.0	1.910242314728478	0.5318530556947324
183.0	1.6771693315396763	6.574491636756146
183.0	-2.1328279998900515	8.340092024135295
183.0	-7.786266718995974	1.6853206437254955
183.0	3.4155988878191694	-14.869537551696048
183.0	4.826326499527151	-1.730366752920889
184.0	0.8310862782010296	0.2340822407942062
184.0	0.42893305301502405	0.7650814300986009
184.0	-0.9388892108306874	1.2216213793261688
184.0	-1.4191301674596464	-0.5689262886832418
184.0	1.0980000470742477	-1.6518587615357063
185.0	-1.3471243638705594	0.08339602951852138
185.0	-0.8769909974141707	-0.6315334502464768
185.0	1.1442340167091218	-0.16142659730368533
185.0	1.0798813445756348	0.7095640180316305
186.0	-10.270829327684822	5.993218527364704
186.0	2.5004964893171993	-9.16004823268792
186.0	9.36625491081881	-6.901609913466182
186.0	8.162698016941665	3.859008770583614
186.0	-9.75862008939285	6.209430848205814
187.0	-2.6183310660154184	-4.509709530580732
187.0	1.0030369898427536	-3.4609948971392344
187.0	2.377077159314535	0.7700054468194538
187.0	1.9608010113408465	2.979778925706234
187.0	-2.7225840944827553	4.220920055194259
188.0	0.8349049048675172	7.233276807282291
188.0	-2.2915953289501827	1.4220407147268832
188.0	-2.2608492147399666	-2.5365227059654027
188.0	-1.2513667645400433	-5.087835832713753
188.0	1.9275605027849212	-6.633054043268382
188.0	3.0413459005777908	5.602095059938337
189.0	3.081529499305761	-1.4117460546416607
189.0	-0.17141504748652148	4.51443570443995
189.0	-2.9101144518192665	-3.1026896497982985
190.0	-0.4145311863257029	-0.9287580557764613
190.0	1.2321887562831912	1.6019630254886381
190.0	-0.8176575699574531	-0.6732049697121727
191.0	6.923917425464357	-4.429913016676516
191.0	1.0423444299457834	13.70614959947863
191.0	-7.28124660264234	0.1951298986665606
191.0	-3.1473509296742455	-3.711636718963813
191.0	2.4623356769064473	-5.759729762504855
192.0	-0.7554134281658818	-1.03678815376678
192.0	0.86949012747131	0.5094826775071013
192.0	0.6883812214691136	1.5239916836168317
192.0	-0.8024579207745225	-0.9966862073571323
193.0	-0.9011327863013753	-0.20521840732906338
193.0	-0.8555632474251632	-0.27275575309931543
193.0	0.9286805625324286	0.06338199909821274
193.0	0.8280154711941061	0.4145921613301858
194.0	6.830587865480464	1.9982650967346207
194.0	-2.706588889117638	2.228262293097041
194.0	-4.123998976362845	-4.226527389831663
195.0	3.417837087598736	-0.2052688330492547
195.0	-1.9474430782019567	3.010667142616367
195.0	-2.693856237519098	1.9539974877302313
195.0	-2.2369256265159194	-1.4934690204709482
195.0	-0.120284044244505	-2.9053714657888814
195.0	3.58067189888276	-0.36055531103754035
196.0	-1.3663388712364228	-5.050261715150333
196.0	6.001835534698131	0.3273508340730724
196.0	2.12530115159853	5.779550306199358
196.0	-4.046025202376564	3.483807770765408
196.0	-2.714772612683679	-4.540447195887542
197.0	0.9556453904044924	2.885414545980639
197.0	-0.9945869958478056	-0.4247042623939312
197.0	0.03894160544331324	-2.4607102835867076
198.0	-2.2558115146224806	3.970434088820778
198.0	-0.9081484367740188	-1.2073254336455161
198.0	1.1758403535724078	-1.5706361221647809
198.0	1.98811959782413	-1.1924725330104615
199.0	2.000362187574263	1.6625393171604381
199.0	0.42883355102431364	1.9825986427954718
199.0	-2.5972329750852423	-1.399078144772956
199.0	-1.4015554035592817	-2.50107300457719
199.0	1.569592640045908	0.255013189394208
200.0	-1.526121711740316	-0.14339187717617174
200.0	-0.790619372681731	-4.437791539752313
200.0	0.5902506180243487	-3.482308227491089
200.0	1.726490466397697	8.063491644419589
201.0	0.10101958458748356	-0.2829686808571204
201.0	0.09567349331087188	0.18449037159928391
201.0	-0.19669307789836082	0.09847830925783065
202.0	0.2719576100031772	0.06673532927028228
202.0	-0.06521761422255654	0.09104958585116334
202.0	-0.20673999578064628	-0.1577849151214314
203.0	0.6665575779805762	-0.5645752197885195
203.0	0.1981244540908776	0.3676736543598317
203.0	-0.8646820320714911	0.19690156542873946
204.0	1.416267361725906	5.2352902003248785
204.0	-4.634320278758046	1.3033320145542437
204.0	-0.6954643226440065	-9.136389023906867
204.0	3.913517239676133	2.5977668090277515
205.0	4.520024499739035	-1.2828766040071542
205.0	2.4863571888660463	2.6382098321031644
205.0	0.9080075244490842	3.705041184407118
205.0	-11.65674855004587	-1.6325223197560481
205.0	3.7423593369917185	-3.4278520927470715
206.0	-0.36784137060162	1.248530156940312
206.0	-1.2205620838651838	-0.9507801366602112
206.0	-0.2972914490739788	-1.3740856144732023
206.0	1.8856949035407826	1.0763355941931017
207.0	-2.598543445323537	2.3622372684193387
207.0	-4.850954361858477	-1.006529161217508
207.0	-4.399545593709854	-2.5562445463182115
207.0	5.118390526480152	-2.5977507047377104
207.0	6.73065287441172	3.7982871438540777
208.0	0.9757727142559214	-1.2655953704740832
208.0	0.63764652545174	3.350578448030064
208.0	-1.6134192397076732	-2.08498307755597
209.0	-1.017334108228927	-0.4266286180709796
209.0	1.0438038789157007	-0.2234516481603468
209.0	1.0951944162110216	0.06720640384191212
209.0	-1.1216641868977981	0.582873862389412
210.0	-2.041633262117298	-3.2625617448561064
210.0	3.5064437131296695	-0.6372305060341539
210.0	-1.4648104510123767	3.8997922508902643
211.0	3.2675916648646743	2.346752731705977
211.0	-1.7884417596062094	3.232624474944831
211.0	-3.457755238213442	-0.4970867305301926
211.0	-0.8590914596626663	-3.2294032183871315
211.0	2.837696792617686	-1.852887257733502
212.0	-0.5463337247698478	-0.15269052069466252
212.0	-0.38273119889941837	-0.660333102801785
212.0	0.8980380661409209	0.26090893590246483
212.0	0.03102685752837174	0.5521146875939524
213.0	-12.144043295162085	4.609924603872721
213.0	-14.403874576860375	4.429455062977035
213.0	-2.7005809426896032	-9.32780405536269
213.0	11.487434694801593	-2.5168079987669056
213.0	11.74774257505805	-1.461196495106698
213.0	6.0133215448524	4.26642888238652
214.0	-0.9391310185729704	-1.6428638672400082
214.0	1.0615406521348179	-0.13746530024144887
214.0	0.7726341841880303	1.0288882399021282
214.0	-0.8950438177498722	0.7514409275793246
215.0	-1.6794985485011498	-0.8882669552097187
215.0	0.9710204863280438	-1.1513235333323255
215.0	0.7084780621730605	2.0395904885420677
216.0	-0.3366338377455209	4.157556501109964
216.0	-0.12144831468561246	-2.0880994034269973
216.0	0.458082152431147	-2.069457097682941
217.0	4.441508314961754	6.980978490653705
217.0	-11.194890519081838	-2.8783896907509288
217.0	1.0494769955151577	-5.4134292255644185
217.0	5.703905208604939	1.31084042566165
218.0	-7.023745352984614	3.0645193430674844
218.0	-6.765853131681409	1.6034788528997457
218.0	3.518872565633381	-3.7663422606405046
218.0	6.576879814070467	-2.3124520549411205
218.0	3.6938461049621845	1.410796119614412
219.0	0.47075934422892884	-0.2539981079388931
219.0	-0.23870001633710736	0.13775432313639296
219.0	-0.23205932789184047	0.1162437848024906
220.0	-4.18372083377214	1.0407648007807138
220.0	4.09788577466251	-2.9370368028275657
220.0	3.956123114913069	-2.4465556561557076
220.0	-3.870288055803397	4.342827658202562
221.0	4.3345080743732955	2.6814103797810196
221.0	4.3776436657129505	4.847942786372413
221.0	-2.509569272348564	2.912255810040043
221.0	-9.860762712407292	-6.559338142903832
221.0	3.6581802446696257	-3.8822708332896574
222.0	-1.1580927138517185	-0.3176914037242675
222.0	-0.48850496072630334	-1.072879333833327
222.0	0.8060732390764738	0.6242446541520056
222.0	0.8405244355015712	0.7663260834055723
223.0	-1.0625773745545413	-1.5281953219363495
223.0	2.136853661503947	0.7040496695245563
223.0	0.8528527052051894	2.0451563949597498
223.0	-1.9271289921545947	-1.2210107425479564
224.0	1.5656868305479041	0.4102595809155051
224.0	-1.6222235173648865	0.05691684835174493
224.0	-1.6802965510021013	-0.379519039424842
224.0	1.7368332378190747	-0.0876573898423948
225.0	-1.1214352239068799	-0.6218286465531732
225.0	1.715933631765166	-0.9305705643771374
225.0	-0.5944984078582973	1.552399210930327
226.0	-0.6185476682976734	0.005466736432302055
226.0	-0.5252657808908355	-1.0864491296733734
226.0	1.1438134491884968	1.080982393241061
227.0	0.8639546352618255	3.4373350385369075
227.0	-5.891981991750219	3.0125850533220815
227.0	-6.4417873444261815	-0.32040167607082126
227.0	4.127967431079632	-4.561912669580888
227.0	4.893205239042738	-3.42477386492615
227.0	2.4486420307921923	1.857168118718814
228.0	0.30445919377547825	-2.2144451743190756
228.0	2.0265800080668055	-0.46787511321927866
228.0	1.8548849146085022	0.6817261304585126
228.0	-0.9944665699409002	3.5287513751038695
228.0	-3.1914575465098673	-1.528157218024002
229.0	0.9057945284341966	-2.259454126058537
229.0	0.7799500277502347	-0.19756343861881992
229.0	-0.2535683444036797	2.0600122814894046
229.0	-0.3669052828657243	1.8243097093189697
229.0	-1.0652709289150208	-1.4273044261310033
230.0	5.584418146079547	1.1947172817388185
230.0	-5.45603627921057	-0.44196269467865623
230.0	-5.305394055342248	-1.5148609907481259
230.0	5.177012188473268	0.7621064036879631
231.0	-1.910833602009769	-2.9532939898356885
231.0	1.7938723509882906	1.4795782101090684
231.0	0.11696125102147721	1.4737157797266056
232.0	-6.448948372339913	1.9834727262980496
232.0	-3.3233572707111834	-7.832963704600221
232.0	-2.921420153255197	-8.111849472280564
232.0	10.27135105516544	0.6756001681123616
232.0	7.11995402204825	8.04546806723536
232.0	-4.697579280907413	5.24027221523499
233.0	-0.8482259429681633	0.4418390158399389
233.0	-0.39518576089747715	-0.5743652047819997
233.0	1.2434117038656343	0.13252618894206447
234.0	3.4645092715522057	4.369412248763624
234.0	0.7232555336353828	4.653623508750682
234.0	-3.7994431891496037	-5.198616065537782
234.0	-0.38832161603798554	-3.824419691976546
235.0	1.2770775399227543	0.2453807932439664
235.0	-2.220956573409627	1.7361192959126905
235.0	0.943879033486873	-1.9815000891566572
236.0	0.4683418249918865	1.1371317007266
236.0	-1.3562695460770433	-0.380302720702368
236.0	0.4003815679263569	-0.47946769339581
236.0	0.4875461531587953	-0.2773612866284167
237.0	-1.1615182095725025	5.090367425317904
237.0	-3.8799789780044187	1.844688671965328
237.0	-4.968604560800287	-1.2087077832521718
237.0	-4.043306295608302	-2.3629089711582436
237.0	7.793547799412627	-2.856650289396386
237.0	6.259860244572887	-0.5067890534764314
238.0	2.239557367329748	-1.760501666060299
238.0	2.3720549283111048	-1.5789203247270176
238.0	-0.6180583082884133	2.2035410058759255
238.0	-3.993553987352448	1.1358809849113858
239.0	2.900451420110729	5.814658366167085
239.0	1.674922902930006	5.838807436204638
239.0	-4.299382169823213	-6.673184859480735
239.0	-3.6924193668840903	-7.634254782800837
239.0	3.416427213666551	2.6539738399097885
240.0	-3.5833208729653974	-0.5025235444927716
240.0	-2.313294517386172	-2.7838171222070045
240.0	5.537085053067481	-1.9747112020938773
240.0	4.156130261293082	1.8363661969294256
240.0	-0.19975386129341932	3.4827834147800374
240.0	-3.5968460627155854	-0.05809774291581937
241.0	0.2827487196176898	-0.15205848466596508
241.0	0.014500485220031289	0.35669030263020735
241.0	-0.4122782071732094	0.37284661887073467
241.0	0.11502900233547793	-0.5774784368350043
242.0	6.324835692741548	5.37208035938524
242.0	3.294134482491091	4.943253282671797
242.0	-11.18766076111875	0.4914810614349636
242.0	-7.131368900243996	-3.5159276726368396
242.0	0.3455187711302763	-6.238030607540268
242.0	8.354540714999846	-1.0528564233148576
243.0	-1.3921369803202381	4.369596268472711
243.0	-3.2386357359305378	-4.730813194942443
243.0	-1.3024770727875856	-4.111738310307633
243.0	3.1219484784837794	2.0412006874621467
243.0	2.811301310554583	2.4317545493152246
244.0	-0.8676699402194559	3.9271120289019965
244.0	-5.816832000386001	0.412437776280965
244.0	3.316752753375886	-7.306169303583364
244.0	3.3677491872295424	2.966619498400382
245.0	-1.098986836777341	-0.8607561308440637
245.0	1.5978801587560774	-0.8811448231487395
245.0	1.045760338727427	1.3363659702699302
245.0	-1.5446536607061323	0.4055349837228429
246.0	-13.464209674387362	9.25643887894459
246.0	-13.014819063555617	4.547397635867832
246.0	-1.7931858916214742	-13.771913516061678
246.0	5.396312727982867	-13.58102834933381
246.0	10.254270613361298	-6.950660026017577
246.0	7.245094100466746	7.253408718235026
246.0	5.376537187753532	13.246356658365617
247.0	-0.4860523498162427	-1.7480985206689394
247.0	0.1281923322708567	-1.3849776630068782
247.0	0.4344496935023441	1.1598094051016008
247.0	0.3280638988544679	1.4412470846535796
247.0	-0.4046535748114578	0.5320196939206359
248.0	0.0802900487732281	-1.494501317535464
248.0	-0.05659987197840377	2.9151223828632427
248.0	-0.02369017679483454	-1.4206210653278064
249.0	5.309762140034092	-8.823188017173312
249.0	5.480533566159053	-8.65309097341423
249.0	-2.635177247459295	8.99383009265516
249.0	-4.323901882509711	7.498186640849639
249.0	-3.8312165762241035	0.9842622570827666
250.0	0.17257267659925823	0.9468662828730732
250.0	-2.8141744683685435	1.9496353804970004
250.0	2.6416017917692782	-2.896501663370073
251.0	-1.4220155613651513	-0.8416009489582179
251.0	1.2571708317378998	-3.730549983270273
251.0	2.221927703747172	-0.9096181009132301
251.0	-2.057082974119905	5.481769033141747
252.0	-0.4265208190366761	-1.143435847064183
252.0	-0.22178336846800087	-1.1402274650962554
252.0	0.7050983088547258	1.017010313175878
252.0	0.6190010043175772	1.0856093704822702
252.0	-0.6757951256675947	0.18104362850231207
253.0	2.057655009986156	-2.2676377117157323
253.0	2.1513802057416886	5.183521540464836
253.0	-4.209035215727852	-2.9158838287491022
254.0	0.003088755047099684	-0.07262018807778176
254.0	0.06775829031930536	0.11533149131292673
254.0	-0.0708470453664209	-0.042711303235144035
255.0	-0.5336760017703861	-1.071956702661394
255.0	-0.27447388661173105	-1.125616534895272
255.0	2.033486277999894	-0.6554193855966102
255.0	0.951598820703141	2.7387361864646005
255.0	-2.176935210320951	0.11425643668865304
256.0	0.6639546227594773	-0.9112854738089439
256.0	0.10095222029230524	0.582526386479974
256.0	-0.7649068430517683	0.3287590873289697
257.0	-4.201042231322315	-5.535108423296738
257.0	10.983602049531441	2.882401016320909
257.0	-2.2227400487549227	2.3917516374196457
257.0	-4.559819769454202	0.26095576955619826
258.0	-0.45790123729790283	-1.071840652625795
258.0	2.327731394328348	-0.3520697988021414
258.0	0.1551107908309114	1.7107579849099683
258.0	-2.024940947861359	-0.2868475334820364
259.0	-0.5721568068054536	-1.1968879405374917
259.0	1.9825654155106027	-0.13356225739873873
259.0	-1.4104086087051444	1.3304501979362253
260.0	-0.7092073272798352	-2.3900180396946413
260.0	2.8607547167061966	-0.9647382948989806
260.0	-0.7387554764065458	1.4634110296960257
260.0	-1.4127919130198077	1.8913453048976145
261.0	0.5297460407900001	1.37098682467021
261.0	-1.5776499673410271	-0.5651411311051054
261.0	0.03667949856846414	-1.858232130135011
261.0	1.0112244279825637	1.0523864365698918
262.0	-0.833122113985759	-0.4794338016337589
262.0	1.1547860948491389	-0.6198446718783256
262.0	-0.32166398086337655	1.0992784735120842
263.0	-0.3831940774799113	0.17247948376651634
263.0	-0.04217013822064192	-0.26875353337548413
263.0	0.4253642157005629	0.09627404960898539
264.0	0.2027199059461767	-0.7377612212661965
264.0	0.3174917738041486	0.9013787951513771
264.0	-0.5202116797503399	-0.16361757388518713
265.0	-4.851925646363833	-0.33927638052244546
265.0	2.709368885205407	-2.22350694023818
265.0	2.1425567611584	2.562783320760639
266.0	-1.2081740190179788	0.4527296251630581
266.0	1.0567236447455508	-1.0015028763757166
266.0	1.1909259706530055	-0.407942331232488
266.0	-1.0394755963805793	0.9567155824451147
267.0	-0.39880032249072267	-1.0255558493261314
267.0	0.22435778548500024	0.4263811750428131
267.0	0.1744425370057236	0.5991746742833215
268.0	1.0397442757770936	-0.3970646428241313
268.0	-1.7577367338917056	2.391678025641592
268.0	0.7179924581146333	-1.994613382817464
269.0	1.5467285077063828	3.3211092396905615
269.0	-3.3555441311427154	1.6675423836948324
269.0	-2.053977214668377	-4.052767572436316
269.0	3.8627928381047165	-0.9358840509490806
270.0	-0.6997819133179456	1.285321269175322
270.0	-1.7573299854120026	1.232475677144957
270.0	0.6638433595690942	-1.8888806289759723
270.0	1.7932685391608476	-0.6289163173442778
271.0	-0.5217505589908734	-0.5727307905826488
271.0	0.8080779326310075	-0.1763906701760708
271.0	-0.2863273736401366	0.7491214607587394
272.0	2.4778291853407044	-0.2438082346969468
272.0	-0.10473433924162046	1.8102415517538781
272.0	-2.373094846099075	-1.5664333170569202
273.0	-0.5235071529107127	-1.4679450690507796
273.0	0.442275895654259	0.23534694792492256
273.0	0.0812312572564321	1.2325981211258759
274.0	2.498585103103982	0.5185752338006995
274.0	-1.064609757072547	1.009221378760828
274.0	-1.5126975811468844	-0.010505671248689508
274.0	0.07872223511544699	-1.5172909413128601
275.0	2.323579878306004	2.747143341434883
275.0	-2.162586609500134	-1.4488442873543987
275.0	-0.1609932688058558	-1.2982990540804826
276.0	-2.3634138024836444	0.5097560946862488
276.0	0.0303017963810836	-2.3966724344867183
276.0	2.333112006102565	1.8869163398004845
277.0	1.871930083322352	-2.563677353619966
277.0	3.2063439561740146	-0.7271104532060931
277.0	-4.579999286972866	4.342542219373397
277.0	-0.49827475252349956	-1.0517544125472795
278.0	1.5890019260043617	13.663049781576305
278.0	-1.3161841699001826	14.205974403489872
278.0	-3.483686115821306	-4.329718573042989
278.0	-1.8349574760470841	-9.029561163398878
278.0	0.012179714443731449	-9.037522919229056
278.0	5.033646121320505	-5.472221529395277
279.0	-0.9521861240552152	1.4489178932905658
279.0	-0.5033324209801161	-0.8359721418437658
279.0	1.4555185450353703	-0.6129457514468089
280.0	-0.9601584308200548	-4.7057639459294665
280.0	5.503122474796404	-3.3572756894041627
280.0	0.8187900291299437	6.399897195481534
280.0	-5.361754073106293	1.6631424398520944
281.0	0.5530042943093618	-1.1699193508348746
281.0	0.8007836989902426	1.3582212073494728
281.0	-1.3537879932995756	-0.18830185651459225
282.0	-0.8307391397966368	-1.7085694949878083
282.0	1.972650350214344	0.25643689054459406
282.0	2.088111850120866	0.8372595169206374
282.0	-1.2611382207626547	1.5308556466923118
282.0	-1.9688848397759244	-0.915982559169731
283.0	-0.2512684429393175	0.5060818234517858
283.0	-0.732638151366622	0.26886125609001543
283.0	0.9839065943059253	-0.7749430795418023
284.0	3.3621913385425253	-1.3108324340000401
284.0	-0.06448402624100114	1.663729671566555
284.0	-0.5579166904561842	1.7413998361166243
284.0	-2.517331873761417	1.0856490102004255
284.0	-0.2224587480839424	-3.1799460838835234
285.0	-0.41357938927730564	-3.1578645434854336
285.0	2.2251000345012315	-0.053052738519203224
285.0	-1.811520645223955	3.2109172820046057
286.0	0.4780319431206129	-3.928418603408893
286.0	1.5175883917361084	-2.4671311710950286
286.0	2.841208721369062	2.43149424357975
286.0	-1.9440102842439395	2.7786637217345396
286.0	-2.8928187719818452	1.185391809189635
287.0	0.3931071260452549	0.014603219931867584
287.0	0.6385529116663772	2.1254396022291915
287.0	-0.7009503266105773	-0.7157395386537052
287.0	-0.3307097111010423	-1.4243032835073468
288.0	0.9062536316742248	0.30304307216551507
288.0	-1.3343521014430557	0.3521137336128142
288.0	0.42809846976883126	-0.6551568057783212
289.0	-3.4256007480344324	2.3830380205101926
289.0	2.2179969854999197	-2.953683053155414
289.0	2.9666375292745597	-2.064318193018617
289.0	-1.7590337667400582	2.634963225663858
290.0	3.469010795604934	-2.5018222096270106
290.0	1.3831843218626125	0.726427177865141
290.0	-3.482412220523301	4.3028073512032945
290.0	-1.3697828969442156	-2.527412319441406
291.0	0.11474633014741531	-1.1989292351801533
291.0	2.7318877908548633	-0.44689524792167357
291.0	-2.846634121002285	1.6458244831018214
292.0	2.1643827583607904	2.6640837147829375
292.0	-1.331441750466979	1.9954763429882376
292.0	-1.4820589570034328	-3.678644871497468
292.0	0.6491179491096457	-0.9809151862737158
293.0	-2.296681722879992	1.1998578726457907
293.0	-2.6648627489039254	-1.8551554412417322
293.0	1.8439155085010326	-1.2821944660298912
293.0	3.1176289632828915	1.9374920346258202
294.0	0.07861637889302209	-0.11455061286782503
294.0	0.0422542472333999	0.21849924982801824
294.0	-0.1208706261264243	-0.10394863696017921
295.0	-1.482596071786966	-2.3641910857585886
295.0	2.042508041752351	-0.6038547520802376
295.0	0.30328028947182606	1.4815860485855783
295.0	-0.8631922594372159	1.4864597892532534
296.0	2.1742458166806036	2.0986743871033378
296.0	-2.255799070897446	-2.051202426956641
296.0	-2.232082810100665	-2.053176295724277
296.0	2.3136360643175364	2.0057043355775765
297.0	1.0741957661564647	-1.1399959019004697
297.0	1.2505425930286218	-1.057406512312027
297.0	0.7228275825767699	1.9441573931029954
297.0	-2.015296588679131	1.1487099179795985
297.0	-1.0322693530827427	-0.8954648968701282
298.0	0.9165139631296648	-2.0953591236256486
298.0	1.2708496803485128	1.931750773943842
298.0	-1.022036126039527	0.17740869765119727
298.0	-1.1653275174386675	-0.013800347969349036
299.0	-3.324962985839328	-1.1751752652075482
299.0	3.705937071754921	-0.39088612559558933
299.0	-0.3809740859155988	1.566061390803146
300.0	-0.17337611885836648	-0.03764643412040604
300.0	-0.12231746715486833	-0.09583531193703908
300.0	0.29569358601322837	0.13348174605744811
301.0	7.6241613826447185	1.3325615329923317
301.0	-5.89969594268912	2.068671500964305
301.0	-5.825674197755097	1.4190163435002394
301.0	4.101208757799497	-4.820249377456886
302.0	3.9171417218003945	2.669736384038656
302.0	-3.1703348346210185	2.529308657284513
302.0	-3.2404048190778116	-0.7385664084465715
302.0	-3.1695187949812014	-1.071192109827664
302.0	1.0948975129934122	-4.826826541605086
302.0	4.568219213886244	1.4375400185561267
303.0	-4.9833880216140045	-0.8093434647389068
303.0	-7.959147047640303	-4.499999023945962
303.0	-2.8353571503126935	-4.777934916001635
303.0	8.416166972037155	2.0254071363963932
303.0	7.361725247529932	8.061870268290107
304.0	-5.842341502067364	-2.1840460598365494
304.0	1.8227776245956016	-5.778880409289797
304.0	2.9159596432844643	0.1931494398080965
304.0	1.1036042341872998	7.769777029318271
305.0	1.1544208446922526	0.1028544783643407
305.0	-0.644401633772929	0.5011088951361478
305.0	-0.5100192109193237	-0.6039633735004984
306.0	4.82808026268232	2.9122516890486283
306.0	-8.144225053243556	-1.9860557281188282
306.0	-4.749500789643972	-3.3757782476152727
306.0	2.9043452222203454	-0.4068395010528296
306.0	5.16130035798493	2.8564217877382685
307.0	0.7227430287631047	1.4726828615348517
307.0	-1.6296474383052153	0.46209363579600804
307.0	0.9069044095421104	-1.9347764973308597
308.0	3.958056730390792	-0.30246453895024206
308.0	-4.155171137391779	4.194609079775902
308.0	-5.596565184417619	1.59055544221481
308.0	5.793679591418604	-5.482699983040469
309.0	0.7105866924002255	-0.967298011340041
309.0	0.4926458106042737	0.17742502638891594
309.0	-1.203232503004483	0.7898729849511407
310.0	-3.378370535061598	13.570776080170013
310.0	-0.05854658335475116	-4.620392587022881
310.0	0.2721692612074842	-4.9042283769771355
310.0	3.16474785720888	-4.046155116170012
311.0	-3.217754443991612	0.8930209639071535
311.0	0.9881485748285841	-2.9815246444493666
311.0	2.1686072579524196	0.09164027919915174
311.0	0.06099861121065331	1.9968634013430593
312.0	-0.6599499492586396	-0.030399220245980685
312.0	-0.2573146451791307	-0.42075598418215393
312.0	0.5428197254060626	0.06511458876830853
312.0	0.37444486903170227	0.38604061565981296
313.0	1.5314449358926059	-2.070184746819143
313.0	0.48234464501297775	5.20946896525921
313.0	-2.0137895809055273	-3.1392842184400713
314.0	-3.922654621664775	-0.07831433226049245
314.0	-3.999092753610621	-2.173044473872297
314.0	-2.0765617352438093	-3.7666293561819586
314.0	9.99830911051922	6.017988162314747
315.0	-1.8413091918511366	-2.0268870310906513
315.0	2.629342322036416	1.4471857451596222
315.0	2.226808559021241	2.222748860359118
315.0	-3.0148416892065413	-1.6430475744280828
316.0	1.7520283077077226	-0.7777360904660989
316.0	-1.0779404613371248	1.2369261086020824
316.0	-0.6740878463706058	-0.4591900181359828
317.0	-4.1807855005580095	-6.34348020732855
317.0	5.261124368597211	2.811767300909298
317.0	4.6418751662165	5.281324970672969
317.0	-5.7222140342557095	-1.749612064253715
318.0	-7.0733201937264525	-3.486763657797715
318.0	-0.7249743183187304	-3.4951755932718407
318.0	3.9911136699288186	3.0869901945365275
318.0	3.8071808421164066	3.8949490565330285
319.0	2.272884702203856	3.204002573958941
319.0	1.8195335007005	3.142331683975741
319.0	-2.1268286704227233	-3.1484206018802983
319.0	-1.9655895324816646	-3.1979136560543813
320.0	2.8488588619601116	-1.8849663138875623
320.0	2.870400736827888	-1.70681799057113
320.0	-2.462413797257207	2.831962482688732
320.0	-2.5465036948488313	2.6370190000392184
320.0	-0.7103421066819874	-1.8771971782692765
321.0	2.5873520900071556	0.8583729300941128
321.0	2.8138199231884546	2.1833311783559344
321.0	-3.123974300538122	-0.8304407567884057
321.0	-2.2771977126574816	-2.2112633516616422
322.0	-0.6661816766753745	-0.2897151976798841
322.0	1.0391097620830152	-1.099672256737263
322.0	0.08156980572393688	0.6877974258991505
322.0	-0.45449789113156347	0.7015900285180107
323.0	-0.9484150472321152	0.18641091803205811
323.0	-0.005582693645945769	-0.7967085863869457
323.0	0.9539977408780749	0.610297668354884
324.0	0.25494441743699475	-0.5789975560145
324.0	0.2610003127838034	-0.06688073313741141
324.0	-0.5159447302208258	0.6458782891519188
325.0	0.2474266224346756	1.0956052946774444
325.0	-0.7018760522112071	0.7284203122393168
325.0	0.45444942977650904	-1.8240256069167788
326.0	0.23389058954092207	0.2590198364770786
326.0	-0.1260117407647961	0.04837194328416128
326.0	-0.10787884877613274	-0.3073917797612376
327.0	2.3370448281490144	0.35012914124845873
327.0	0.6830931218707168	1.5519544495461544
327.0	-3.020137950019745	-1.9020835907946119
328.0	-4.32299373816985	-0.5717359609161063
328.0	2.629947219315244	-1.541676511166412
328.0	1.693046518854607	2.1134124720825165
329.0	0.18866972779195745	0.3409709827463143
329.0	-0.455598866052901	-0.15473534352328938
329.0	0.26692913826093195	-0.18623563922304137
330.0	2.2212532440328894	2.652759209145783
330.0	-1.1905524703610897	2.368516726799448
330.0	-4.142575794629224	-0.5889093899205804
330.0	-0.8662586642739014	-6.775490114071098
330.0	3.978133685231306	2.3431235680464697
331.0	-9.68672169123585	-7.390599944764278
331.0	-7.465930655349338	-7.971287625472755
331.0	5.738315989087676	2.367094315382581
331.0	7.797333248342174	4.581784014370533
331.0	3.6170031091553394	8.413009240483918
332.0	2.4602124003271504	-0.24701590834708242
332.0	-0.5172071608981963	2.337638319202568
332.0	-1.9430052394289792	-2.0906224108555005
333.0	-0.2356132019004445	0.4517992129937538
333.0	-0.3387453468486631	-0.4916472341264702
333.0	0.5743585487491026	0.0398480211327013
334.0	0.4277230328804269	0.18488538964954018
334.0	-0.07441062040549662	0.46296156126555804
334.0	-0.3533124124749236	-0.6478469509150956
335.0	-0.46597632657978716	1.0258130295436005
335.0	-0.30310247547071917	-1.239290741091765
335.0	0.44473527490513265	-1.150799502844301
335.0	0.32434352714536757	1.364277214392469
336.0	0.38068408319405667	-2.4528410730734236
336.0	3.4839762589966767	-1.38928591625995
336.0	0.8819191488130993	2.2157323836929597
336.0	-1.7415413987625357	1.8065106423182
336.0	-3.0050380922412634	-0.18011603667781317
337.0	0.6152364331682254	0.2718401935514464
337.0	0.3936747475590367	1.2278321792308657
337.0	-1.128615736698919	-0.5052093932906282
337.0	0.11970455597167257	-0.9944629794916874
338.0	-4.6562633133629205	6.332164352063643
338.0	-6.494322882710941	6.649033949278422
338.0	-1.9809026780985133	-4.78066533605263
338.0	5.813091953311128	-4.675036214529679
338.0	7.31839692086127	-3.525496750759759
339.0	-0.8192760481863309	-3.286733231839804
339.0	2.073411728574614	1.1655643649441374
339.0	0.2206319969254643	1.690195888207311
339.0	-1.4747676773137681	0.43097297868831874
340.0	5.065497327908931	3.3383485188438646
340.0	-4.63791544543543	1.2322230259418743
340.0	-0.4275818824734914	-4.570571544785712
341.0	3.363961634964452	2.533029726395183
341.0	-1.7740184576549094	-0.7067193219927449
341.0	-1.5899431773095176	-1.8263104044024585
342.0	2.7307630070385067	0.696244703301648
342.0	2.2877437541156933	1.0390606303726655
342.0	-6.098999018626266	-0.2773792731990712
342.0	1.0804922574720663	-1.4579260604752577
343.0	3.6740531907999197	-2.9399803844990413
343.0	-0.30391464927140577	2.1946105772357325
343.0	-3.37013854152853	0.7453698072633486
344.0	0.4161152929277692	-0.16163360405095012
344.0	0.36826619105529024	0.8660074816346949
344.0	-0.7187718561391263	0.07501497040734367
344.0	-0.06560962784392432	-0.7793888479910994
345.0	-8.506263310938884	-4.488359305350162
345.0	3.190452556708591	-8.454182910735621
345.0	3.6009785428473453	5.320604373988624
345.0	1.7148322113829555	7.621937842097154
346.0	0.4699036240954677	-0.41652318722591597
346.0	-0.42061065018717586	0.80438631802163
346.0	-0.46814324781146055	0.7939403952633176
346.0	0.4188502739031227	-1.181803526059065
347.0	0.7682998864691227	0.07491587705093308
347.0	-0.2249627538672186	0.3758133110875131
347.0	-0.5433371326019031	-0.4507291881384603
348.0	-1.6875432931230794	-0.6407880947575096
348.0	1.32358617204724	-0.49516514564508696
348.0	0.36395712107583933	1.1359532404025967
349.0	-5.112327654157758	3.5750858051239796
349.0	-4.616081498365445	0.6380718645383757
349.0	9.728409152523207	-4.213157669662312
350.0	-1.457361556409751	-4.2184920831582415
350.0	5.008475204033126	-1.3764451525375563
350.0	0.5809949798466718	5.305461192063408
350.0	-1.6740556586521342	3.1253284769651613
350.0	-2.4580529688179036	-2.835852433332761
351.0	1.745607704105888	1.654222128044489
351.0	-2.4150573818487624	-0.5364031287655964
351.0	0.6694496777428748	-1.1178189992788927
352.0	6.5599401883727655	2.3409026163767117
352.0	-0.08563901292631271	1.0705505835584381
352.0	-3.5419615266318054	-0.9776849438367301
352.0	-3.6629693231396665	-1.2457418742714033
352.0	0.7306296743250121	-1.1880263818270254
353.0	-0.7638410328881918	0.4411702485013552
353.0	-0.35930300728273806	-0.9099540081855265
353.0	1.123144040170935	0.46878375968415814
354.0	0.6698263826324187	-1.9867937534094495
354.0	0.6901315406975207	3.2226198706384803
354.0	-1.359957923329939	-1.2358261172290168
355.0	0.5356054344033405	1.7394527886258162
355.0	-1.2903827074822214	-1.8270129292857789
355.0	0.7547772730788811	0.08756014065996619
356.0	-0.30720840563651497	1.6715465515565544
356.0	-0.5196440865539727	-1.1961406939240797
356.0	0.8268524921904905	-0.4754058576324727
357.0	0.01809478732567684	-0.071073821340503
357.0	0.06063079142102716	-0.05987109132424382
357.0	-0.07872557874668551	0.13094491266476954
358.0	2.472188428294207	-1.291611670491858
358.0	-1.421990603876594	3.469503939734439
358.0	-1.0501978244176098	-2.1778922692425824
359.0	3.6794139505377372	0.2035282177494826
359.0	-0.4348185848149034	2.6615607286291945
359.0	-3.7422552006152907	-1.0387776399630473
359.0	0.49765983489242915	-1.8263113064156213
360.0	0.05743836566323973	0.18955198098494386
360.0	-0.14989948942909304	0.11370146057867753
360.0	0.09246112376586335	-0.30325344156363143
361.0	0.5658501731134542	-0.742607685077842
361.0	0.6386988935514241	0.947252498024118
361.0	-1.2045490666648782	-0.2046448129462759
362.0	0.730587304918107	0.2439841876332382
362.0	-0.39371430476359154	0.5343252120920653
362.0	-0.3368730001544894	-0.7783093997253192
363.0	0.7191770516324878	1.6448965272560883
363.0	-1.5896473211465194	0.14023082145179477
363.0	-0.7362490049851553	-1.5146829972628044
363.0	0.384981367793792	-1.1396175495723786
363.0	1.2217379067053789	0.8691731981272983
364.0	1.624571553972337	0.5374226493890126
364.0	-3.4302644872223045	1.1866075138905603
364.0	0.4881620883783424	-1.260093335223678
364.0	1.3175308448715959	-0.4639368280558747
365.0	10.724543521468352	4.782746570638223
365.0	-4.871989719358808	1.8690501222558178
365.0	-9.017092638617541	-5.3651481154568605
365.0	-7.536369564938794	-4.80726201630349
365.0	10.70090840144679	3.5206134388663113
366.0	4.6162002047215465	-1.315139308817806
366.0	2.1413967495678463	2.379207720009473
366.0	-0.6672368870319927	1.5299549420951726
366.0	-6.090360067257423	-2.594023353286824
367.0	-4.72078456879716	-2.431069469809786
367.0	3.557851904913863	-4.208151880090354
367.0	6.191653070312877	2.3476058639157307
367.0	-5.028720406429583	4.29161548598441
368.0	-0.13415222575264685	0.2281029120736242
368.0	0.08541440119389855	-0.3014033613825945
368.0	0.048737824558733954	0.07330044930897715
369.0	4.52834152596004	-1.623512803370142
369.0	2.2115972372440917	4.70002221376572
369.0	-4.659816866977333	-0.20696260633236285
369.0	-2.0801218962267995	-2.869546804063215
370.0	0.10943520937294318	-0.16072469298188335
370.0	0.1882322175052411	0.3890087992489622
370.0	-0.29766742687820125	-0.22828410626708961
371.0	1.2050357624139485	3.184459130716656
371.0	-14.022512695190223	0.41598283666607827
371.0	0.4492180169489717	-5.500419852458067
371.0	8.713857142542224	-1.4821250790295606
371.0	3.6544017732850795	3.3821029641049116
372.0	1.1555250466138183	0.8045157699861836
372.0	-2.2319404744696434	0.5611520518364387
372.0	-0.26187465031612656	-1.7491200067129526
372.0	1.3382900781719627	0.38345218489034166
373.0	-3.4878613101765854	-5.789918769064582
373.0	4.994234160300265	-2.5986318034607323
373.0	15.182567846151652	14.598729524749462
373.0	-8.286356160905646	-2.4467752341252353
373.0	-8.402584535369646	-3.7634037180989273
374.0	-1.828585723634355	-4.783450912736716
374.0	4.742036286976708	0.821044105602903
374.0	1.7437524418416035	2.806873565366665
374.0	-4.657203005183954	1.1555332417671547
375.0	-0.742468810283861	1.7997584810493872
375.0	-0.48630170433936387	-1.354458300332114
375.0	-0.2470880537766778	-1.4779000861406244
375.0	1.4758585683999048	1.0325999054233441
376.0	-1.6202367161949833	0.1337086253530685
376.0	1.0952760973085751	-0.42672111351465436
376.0	0.5249606188863951	0.29301248816157954
377.0	6.027466187701885	3.1630602286761453
377.0	-2.8052653122168096	4.007166594604142
377.0	-4.353812278832919	-1.4384531315488833
377.0	-3.745478388049485	-3.1414694266211467
377.0	4.877089791397349	-2.5903042651102823
378.0	0.6984493861581925	-0.07523883453652419
378.0	-1.5121196765539393	0.418628465516779
378.0	0.8136702903957325	-0.3433896309802572
379.0	-0.09801752678557822	0.024548146709173182
379.0	0.05206814191962992	-0.1486176290593669
379.0	0.04594938486595521	0.12406948235019534
380.0	1.5305166036512627	1.2919948573769466
380.0	-1.7686118418037267	0.35457196196759655
380.0	0.23809523815247102	-1.646566819344562
381.0	-0.6134214829904336	-1.034738399214766
381.0	0.9116558281388122	-0.6339780903586447
381.0	0.0024702046086391843	0.861552353955636
381.0	-0.3007045497570213	0.8071641356177467
382.0	0.9246446940531179	1.1478016783462253
382.0	-0.6724319356600083	-0.0872154216503091
382.0	-0.25221275839309065	-1.0605862566959419
383.0	-4.30125845245936	0.4863744295194554
383.0	0.70557253184783	-3.207235075858626
383.0	3.5956859206115364	2.7208606463391733
384.0	4.1578251952717284	-0.3789505441287968
384.0	-9.026993768180727	2.2760712139166372
384.0	4.869168572909	-1.8971206697878387
385.0	1.1677062646646785	1.3379435252561362
385.0	-1.8548413348437571	-0.372418867271725
385.0	0.6871350701790921	-0.965524657984417
386.0	0.19194982084728252	2.838072035295568
386.0	-1.9215127565731938	0.023409903263576504
386.0	1.7295629357259117	-2.8614819385591463
387.0	-0.30260471841015446	1.5907015581561723
387.0	-0.4486355849866508	-0.8041732921432214
387.0	0.7512403033968026	-0.7865282660129354
388.0	1.53549091936543	0.9245861965137854
388.0	0.07691465950644541	1.1529692514258312
388.0	-1.6124055788718623	-2.077555447939625
389.0	-0.4890271195504313	1.7313176911116002
389.0	0.0325729110201996	-2.295589034494217
389.0	0.45645420853020763	0.5642713433826616
390.0	2.3090044072204106	-0.2136383319151247
390.0	-2.455377319535828	0.6366634968653372
390.0	-2.434804624717952	0.45483938441946925
390.0	2.5811775370333727	-0.8778645493696757
391.0	2.0476696317501317	1.548010044530507
391.0	0.02172826481464596	4.888679774183597
391.0	-2.626480680053357	-3.4468973195481913
391.0	0.5570827834885641	-2.9897924991658993
392.0	3.064959433255345	-1.1822966384532367
392.0	1.8675291684613198	2.1972279727988666
392.0	-2.812117735090991	-0.018377626524170187
392.0	-2.1203708666256844	-0.9965537078214481
393.0	-1.4528316707187097	-1.5247792361034382
393.0	1.6421681578848955	0.9183130571965132
393.0	-0.18933648716618068	0.606466178906916
394.0	-0.18793699138005968	0.06962799391462998
394.0	-0.05699795249273057	-0.09384376369042466
394.0	0.2449349438727863	0.024215769775800602
395.0	5.793207386809761	-2.510544813046624
395.0	-2.0969425968487756	5.984642280583796
395.0	-3.6962647899609813	-3.4740974675372014
396.0	-0.5944017497902351	0.07616900415883959
396.0	-0.1185103319954943	-0.3595952430015959
396.0	0.7129120817857117	0.28342623884274676
397.0	0.7674958959646754	-1.368006380069037
397.0	0.2430601689821712	1.7429284346361933
397.0	-1.0105560649468714	-0.3749220545671424
398.0	0.6449581591928939	-1.3430324875008413
398.0	1.067181198227019	0.002215066925744996
398.0	-1.712139357419909	1.340817420575081
399.0	-2.0900483262462415	-0.34975366634346916
399.0	4.339440919877152	0.1768911229714849
399.0	-2.2493925936309167	0.17286254337198637
400.0	-0.5115552943571872	2.087241189003411
400.0	-2.296010822438859	-0.7583467465678777
400.0	0.6415459160053484	-1.6653197288551769
400.0	2.1660202007906575	0.3364252864196299
401.0	-0.06363497619883428	0.04922015962565854
401.0	-0.08362320868937283	-0.002359137147586725
401.0	0.14725818488824982	-0.04686102247804354
402.0	0.10892039098635975	0.9527334008862554
402.0	-0.9427903139691765	0.05388955307854765
402.0	0.8338699229828316	-1.0066229539648088
403.0	-0.007896898893829968	0.2470790170241614
403.0	-0.12842247915316962	-0.09317397610705189
403.0	0.1363193780469702	-0.15390504091710286
404.0	-0.14969999827106345	0.026665280717051383
404.0	0.06916237676227337	-0.09224608780656258
404.0	0.08053762150877601	0.06558080708951314
405.0	0.0661926161851747	0.1942134716997917
405.0	-0.27246469958884817	0.19414793329760296
405.0	0.07750910033471743	-0.25227019230968395
405.0	0.12876298306892292	-0.1360912126877254
406.0	-0.2400812232144548	-0.08692759232188105
406.0	0.24163786740948012	-0.006363410256373572
406.0	-0.0015566441950173471	0.09329100257826069
