# Supplementary material
Source: ML conference proceedings conference paper supplement (https://openaccess.thecvf.com/content/CVPR2021/html/Harel_Crossing_Cuts_Polygonal_CVPR_2021_paper.html)
Supplement: Supplementary file 2 [file Harel_Crossing_Cuts_Polygonal_CVPR_2021_supplemental.zip › Dataset/D4/p3/pieces.csv]

piece	x	y
0.0	-1.4773722164496625	1.973673512468204
0.0	-1.651040990473235	0.9310246922950954
0.0	1.3191988223667634	-2.948992344510233
0.0	1.809214384556125	0.04429413974692753
1.0	-3.029594062083122	1.1491489595193318
1.0	0.4927815795140375	-2.307067891436902
1.0	0.9587862938295442	-2.1606434562558436
1.0	1.5780261887395333	3.3185623881734116
2.0	-1.848816520698092	1.524932462815993
2.0	-1.10430522486492	-2.4731986206493026
2.0	0.12653840103864444	-3.5171905900190783
2.0	1.6487898796151765	1.1993482843439889
2.0	1.177793464909185	3.2661084635083637
3.0	5.385030490744069	-6.948608981173763
3.0	5.407494039478973	-5.930716577181668
3.0	4.706335847853114	-2.858043894095163
3.0	-7.751385877203351	10.842579950970592
3.0	-9.256763519032981	9.822201982072253
3.0	1.5092890181601009	-4.927412480592187
4.0	-0.06417542326522696	0.9950248751291958
4.0	-0.4252232612548467	-0.537724216740952
4.0	0.4893986845200535	-0.4573006583882339
5.0	-0.8441876533006076	9.266804866122056
5.0	-3.258899757287258	7.408531491667075
5.0	-6.912906126329833	-5.008202126158071
5.0	-5.900699360596727	-5.931859555503369
5.0	8.11000895114485	-4.2740706923548695
5.0	8.8066839463696	-1.4612039837727866
6.0	1.2740898627467505	-2.849660794740723
6.0	1.6717414138624598	0.1279040033397456
6.0	-0.5246775110062845	1.2987038163946882
6.0	-2.4211537656029307	1.4230529750062944
7.0	-1.4790424536061706	-0.6073935589390789
7.0	0.3973974307118081	-1.0078762312888454
7.0	1.0816450228943622	1.6152697902279223
8.0	-3.934690720850062	0.8481978993917763
8.0	0.19525279336576862	-4.316559683097251
8.0	4.622333067580846	-2.1722157185031397
8.0	2.022971554833421	1.1301539771260032
8.0	-2.905866694929972	4.510423525082581
9.0	-1.043439756557284	1.0700121455111935
9.0	-1.4814243928591477	1.05389809851772
9.0	-1.1025019344148195	0.017331193756329244
9.0	4.487865115987683	-3.1417795594474773
9.0	-0.8604990321564792	1.0005381216623233
10.0	-0.21708988338725277	-8.267601762652898
10.0	3.0533728169460215	-8.420267372922737
10.0	6.71745116740721	9.648030532604471
10.0	-4.703194410222217	10.16756934662873
10.0	-4.85053969074373	-3.1277307436575352
11.0	-1.5151108808139746	1.4292903319260004
11.0	-0.7100876114295454	-1.916007514085814
11.0	1.759870994646333	-1.3920353925363567
11.0	0.46532749759717973	1.8787525746961844
12.0	0.39868469735944867	5.32287315242861
12.0	-2.409579168633899	-2.7849020935950644
12.0	-1.7033740121489158	-5.916135543279614
12.0	3.714268483423352	3.3781644844460796
13.0	-1.414057311893377	0.3059661517233625
13.0	-1.4463037251642183	-0.28496705021050706
13.0	2.860361037057607	-0.020999101512847007
14.0	1.8181926748854274	-0.5061281585978604
14.0	-2.949043674127869	3.093821413040045
14.0	1.1308509992424454	-2.5876932544422
15.0	-0.4884676935285568	-1.4413721087160694
15.0	-0.3223438268393266	-1.5363160253390262
15.0	0.8956547621328264	1.3944947133832937
15.0	-0.08484324176495517	1.5831934206717835
16.0	-8.76529652758493	-5.6720394008521575
16.0	-7.939251346855462	-8.722793930956026
16.0	-5.66139929238752	-9.56316974408827
16.0	8.167243695463702	7.258131455920405
16.0	7.49194708579346	8.285372048207126
16.0	6.706756385570715	8.41449957176895
17.0	-0.23216529408300748	-1.7924190391238384
17.0	0.5419630377910678	-0.22459262317749107
17.0	0.37180626615430534	0.3769215952749987
17.0	-0.24077272280996034	0.9341174495099576
17.0	-0.4408312870524259	0.7059726175164022
18.0	5.928734986911008	-2.1548163994330314
18.0	1.7068364661513176	1.698261699939811
18.0	-2.3625883092394524	1.9479004583650406
18.0	-5.272983143822872	-1.4913457588718273
19.0	4.336084363717035	-2.3839156117193347
19.0	0.9575881806558412	5.520187785102016
19.0	-1.3502491599637094	3.622110314300948
19.0	-2.0325494919758835	0.8880033416545342
19.0	-1.5669537261844373	-2.823398074437301
19.0	-0.3439201662488806	-4.8229877549009
20.0	2.0575818329218594	0.07386977753982915
20.0	0.08279043778875947	1.5514094172961221
20.0	-2.140372270710619	-1.6252791948359513
21.0	-0.11342920287749236	0.05769260387957287
21.0	-0.3598214648817093	-0.3008983124172047
21.0	0.4732506677592158	0.2432057085376331
22.0	1.0810674171792773	-0.013537625576660606
22.0	-0.537531020268358	0.42654696568726297
22.0	-0.5435363969109165	-0.4130093401106042
23.0	1.27017928746531	-1.9869930878563071
23.0	1.6049656249185176	-1.2710897103664935
23.0	0.0664333774443776	1.4820833124300323
23.0	-2.9415782898281977	1.7759994857927817
24.0	-0.1332260909641154	0.07960347175135746
24.0	0.13861489325775794	-0.16960919604031807
24.0	-0.005388802293648652	0.09000572428898224
25.0	-4.772015842375609	2.1787532865784565
25.0	-6.458889933845526	-2.2881975050867847
25.0	7.644820652680066	-2.2814593489601274
25.0	3.5860851235410816	2.390903567468457
26.0	-0.3685827027114456	-0.38149315072050866
26.0	0.2936034907319078	-0.7882863478477602
26.0	1.1942386007139603	-0.3679114442292943
26.0	1.4289357144672545	-0.004222995165348187
26.0	-1.2505753885844582	0.8204576411424851
26.0	-1.2976197146171897	0.721456296820423
27.0	-4.622259291190112	15.65173028390816
27.0	-1.6615685710743575	-2.172363497368121
27.0	2.878800847430324	-9.432789473979625
27.0	2.8958796657449284	-9.318420527603605
27.0	0.5091473490892087	5.271843215043178
28.0	2.757723833212127	-2.3780337667708498
28.0	0.9679166431810057	2.1067922217133774
28.0	0.5118360535824091	2.283145982569447
28.0	-2.1001015688518363	-0.16606078239996713
28.0	-2.1373749611237236	-1.845843655111994
29.0	0.8246271279984425	-0.5600921038794583
29.0	-0.2686489551989949	0.7179652441759775
29.0	-0.5559781727994357	-0.1578731402965452
30.0	-1.4371560498550007	-1.6296290642907447
30.0	1.94165415950441	0.33228960640809135
30.0	0.839089135026237	1.209797225418798
30.0	-1.3435872446756578	0.08754223246384418
31.0	-0.7055952352613998	-0.5128937175161028
31.0	-0.3333303887451393	-0.7633501579210816
31.0	-0.15341131469902342	-0.6542087001205803
31.0	0.6200946422698487	0.9436121393988027
31.0	0.572242296435728	0.9868404361589619
32.0	-1.8478615377439909	-1.7030323298777188
32.0	-1.1665230198782708	-2.8241755433133924
32.0	3.0143845576222614	4.527207873191111
33.0	-2.23157800379556	-6.337959589169828
33.0	5.979381250851699	4.242349944186175
33.0	1.5758074284271761	7.145181093498384
33.0	-5.323610675483294	-5.049571448514708
34.0	-1.914428788253569	-4.369973531439121
34.0	8.694495764823179	-3.2833979886474434
34.0	-6.7800669765696	7.6533715200866075
35.0	-2.0728531363719873	1.1067045079328484
35.0	-2.169259373011249	-0.9503148325833906
35.0	0.9076738654149337	-0.9964320103344806
35.0	1.785630189936494	-0.02825208962693193
35.0	1.5488084540318352	0.8682944246119668
36.0	-5.2345379155564835	-0.09785875198217564
36.0	-2.2457286965607337	-0.5683205064468477
36.0	6.3183407586282145	-0.5784483115618384
36.0	6.381146358512796	1.2398490701755795
36.0	-5.219220505023778	0.004778499815253356
37.0	0.7209592205438404	0.7702087584451317
37.0	-0.6697201331164797	-0.1138066215067655
37.0	-0.051239087427362634	-0.6564021369383594
38.0	0.6511172755898146	0.24719332350180317
38.0	-0.722670942690329	0.11703984991419447
38.0	0.07155366710051449	-0.36423317341599765
39.0	4.050928462440979	-4.8373059863512715
39.0	-0.4563086741812561	5.619752048019885
39.0	-3.5946197882597173	-0.7824460616686051
40.0	-2.2998752022878395	1.2107929021668018
40.0	1.9321899533865465	-1.4889041831357765
40.0	0.3676852489012959	0.27811128096896826
41.0	-0.33013193650930767	-1.3393680056565072
41.0	0.6196776818979556	0.12939715045734454
41.0	0.3228981270904033	0.7823029795579836
41.0	-0.6124438724790577	0.4276678756411848
42.0	2.4500654462822666	1.4130730770297062
42.0	0.9892947895259395	2.818411943936895
42.0	-2.0872407684867356	-1.5752438486039866
42.0	-1.3521194673214774	-2.6562411723626074
43.0	-2.6903574253768237	0.8799356668322373
43.0	-1.7243620416266507	-3.7923813334180894
43.0	4.626846671717699	0.4579787179216237
43.0	-0.21212720471421292	2.4544669486642214
44.0	-4.789488765037134	3.6544900473389754
44.0	-3.1108926675747615	-0.12168248615903465
44.0	2.0616960099979442	-2.379210183401264
44.0	5.838685422613954	-1.15359737777869
45.0	2.583659584317415	0.950020707709293
45.0	0.7848324793100748	2.5265146966490724
45.0	-0.8203846603794293	2.4317496769334594
45.0	-1.0041969506010473	1.764285332888171
45.0	-1.1788425332131505	-3.718672438779084
45.0	-0.3650679194338904	-3.953897975400929
46.0	0.5669418633658091	0.6965765704042038
46.0	-0.6307200392859402	-0.3589544483701185
46.0	-0.5220691345967793	-0.465879799181616
46.0	0.5858473105169028	0.128257677147524
47.0	10.097526786561907	1.0231691518334047
47.0	8.064445305599893	4.185668939542853
47.0	-4.084358344145913	7.397766836235716
47.0	-8.332718565432087	-5.651533182145994
47.0	-5.744895182583791	-6.955071745466007
48.0	0.013491489509953816	-0.12556289438525556
48.0	0.1066964766153104	0.11922022431645213
48.0	-0.12018796612525547	0.006342670068824149
49.0	-5.78053344045506	0.2565450725417464
49.0	-1.544279291484498	-4.32294916861423
49.0	3.979057290106915	1.4915561870570386
49.0	3.345755441832647	2.5748479090154457
50.0	1.576710248899524	-9.046941556383574
50.0	4.378152220547447	-8.230834730140138
50.0	-1.4624092765180916	9.083493183813745
50.0	-4.4924531929288705	8.194283102709946
51.0	5.3915832747403805	0.244099749693521
51.0	-2.002911261310931	4.655625009299455
51.0	-4.794785689944112	-0.16342436152447215
51.0	-2.109627220520002	-2.6495340579926854
51.0	3.515740897034656	-2.086766339475849
52.0	-3.8865458755777986	-2.9640909574798013
52.0	4.183083291261423	0.28507663492597546
52.0	4.641020405129016	1.337216849096786
52.0	0.983981791877643	1.7268267945502422
52.0	-5.921539612690287	-0.3850293210932123
53.0	-0.8915583534653345	1.5757694793475368
53.0	-1.8915658452072086	-1.618339130615301
53.0	2.7831241986725437	0.0425696512677628
54.0	-1.2894226152161878	-2.5249179998443254
54.0	1.811280993109723	-1.9826209750201707
54.0	2.6501987108806837	2.8828292228679735
54.0	-3.1720570887742054	1.6247097519965181
55.0	0.7327459869307921	7.2660553811776705
55.0	-2.776261234233431	1.8679346724176216
55.0	0.406911966402138	-3.1619403415607144
55.0	0.7314733583918885	-3.1756520620255437
55.0	0.9051299225086141	-2.7963976500090233
56.0	2.7847228251892187	-4.445273499609719
56.0	1.7228017768299813	0.8547338145574166
56.0	-0.7480743096156697	2.831650067443393
56.0	-3.7594502924035162	0.75888961760891
57.0	-11.330703784968863	0.05562616069436732
57.0	7.774948720980502	-1.9259349940594688
57.0	8.539421584070707	-1.2411070812633618
57.0	-4.983666520082353	3.111415914628472
58.0	-0.11393837281044471	-0.30855535221383357
58.0	0.26393657140094834	0.04809242709790589
58.0	-0.1499981985905107	0.260462925115928
59.0	-1.7651593250246824	5.4602379058700565
59.0	-6.248973960947462	-3.419361371110283
59.0	-4.9050241833784884	-4.252529457701529
59.0	6.608842052631903	-0.5875908489017001
59.0	6.310315416718739	2.7992437718434493
60.0	0.4217225717593565	-2.9950183109835113
60.0	4.829297015329053	-0.995369679173887
60.0	-2.024051995892859	3.401013265544008
60.0	-2.6305227709788963	2.9339866605714198
60.0	-0.5964448202166529	-2.344611935958035
61.0	0.6148294964842879	-0.23968349164546637
61.0	-0.10669716346504945	0.5005794649760307
61.0	-0.5081323330192383	-0.26089597333056425
62.0	-2.9639805205236516	0.62609914019286
62.0	-3.2688241319336506	0.4001258827395255
62.0	-3.5934468156462014	-3.4619810286037147
62.0	5.6995755583645735	-0.35887331189654115
62.0	4.126675909738935	2.7946293175679204
63.0	0.9010786942722434	1.4051095328550445
63.0	-1.9740745159030686	-0.711659842818283
63.0	1.0729958216308442	-0.6934496900367522
64.0	5.6639342538880335	2.4117082392392044
64.0	-3.022016605584945	2.5361048265925947
64.0	-6.157280492403236	-2.525657694738021
64.0	3.515362844100141	-2.4221553710937904
65.0	-4.067703520658307	-4.362129477691131
65.0	4.50872003220405	0.8835909048361758
65.0	3.4320821528349557	3.8690082900863842
65.0	0.5027281714034002	3.2220042992352855
65.0	-4.375826835784105	-3.6124740164667015
66.0	2.5362927403295394	-4.924297202295218
66.0	3.8153520708465	-2.365615646159956
66.0	-1.4341102365949583	7.101872974554942
66.0	-2.137781596290229	6.492661779663515
66.0	-3.7061373468021315	-0.8324906944813164
66.0	0.9263843685112687	-5.472131211281983
67.0	-1.6458831267461786	-0.3104905014875834
67.0	1.084606086301148	0.02765632276750052
67.0	0.5612770404450192	0.2828341787201125
68.0	0.1866078551611458	1.5366069555162567
68.0	-1.4519836810591134	0.04310360971600882
68.0	1.265375825897956	-1.579710565232282
69.0	1.0116115826777028	1.5259809790175296
69.0	-1.8080195787608404	-0.09959954989039185
69.0	-1.2122646163538555	-1.1257596515256825
69.0	0.39580718431608203	-0.724705344795509
69.0	1.6128654281208974	0.42408356719406826
70.0	1.439447011019596	-1.3278721592177052
70.0	1.712557785416149	2.4655741188682674
70.0	-1.4779859105796493	-0.33246983819266795
70.0	-1.6740188858561111	-0.8052321214578966
71.0	-0.8504379370701446	-1.0381486112653666
71.0	0.9929005781372762	-1.1213093551982627
71.0	1.308504546014511	0.8249977223021945
71.0	-1.450967187081633	1.3344602441614324
72.0	-8.353795380340198	-4.640752109833345
72.0	-0.0981953831863478	-9.492404531579187
72.0	8.173947267547364	0.14640690561306902
72.0	1.708954837557785	7.502285980888067
72.0	-1.430911341578604	6.484463754911358
73.0	2.626098218855677	3.403190604769651
73.0	-2.0948672484493227	3.1460784139261566
73.0	-1.967067287093336	-1.1469009052540733
73.0	-1.273169483005577	-5.208805979668704
73.0	2.709005799692584	-0.19356213377302622
74.0	1.349901491631616	4.660709113516495
74.0	-3.558099170550304	-2.9438802276574583
74.0	-1.9896937752217179	-3.8408887419786075
74.0	4.197891454140403	2.124059856119585
75.0	-0.5313002632300998	-0.0800198967736222
75.0	0.9424305911069054	-0.6323850944594057
75.0	0.19700932412279085	0.485399807297687
75.0	-0.6081396519995979	0.22700518393535146
76.0	0.7479434621343966	-1.1235948143562426
76.0	-0.06528803499727798	0.9417017664393554
76.0	-1.2442469897126598	1.5048885769308566
76.0	0.5615915625755412	-1.3229955290139697
77.0	5.534360043662449	1.5885007640752669
77.0	4.755541909666074	1.9842631757604487
77.0	-3.3857611873540048	0.05325972423507763
77.0	-3.4975628405579555	-1.7309574570128279
77.0	-3.4065779254165545	-1.895066207057954
78.0	-2.384116769843176	-1.085098420308862
78.0	-1.1998642773681916	-2.9436478957224947
78.0	3.452743067800138	1.7505221310895216
78.0	0.13123797941124205	2.2782241849418052
79.0	3.1466037022276216	-3.189039818419641
79.0	3.1376900737461457	-0.8919581516116518
79.0	-2.2825419710205948	5.207795814101949
79.0	-6.774269090060594	4.83081924944106
79.0	2.7725172851074165	-5.957617093511726
80.0	4.847595670643087	-2.5881343009059696
80.0	2.3725284940160063	0.470861493576785
80.0	0.07780148143638588	1.1980098969377697
80.0	-7.297925646095472	0.9192629103914034
81.0	5.805352793217548	3.225493608736177
81.0	-8.017827441471564	0.909007470824827
81.0	-7.916807562308802	-0.10878580863421572
81.0	3.0691268683814563	-3.0019983298821877
81.0	7.060155342181356	-1.0237169410445963
82.0	0.013753124154026637	0.21452720284553484
82.0	-0.22958107570349875	0.2057414107748618
82.0	0.21582795154946843	-0.4202686136204104
83.0	-1.1959621353596592	-1.681748045179721
83.0	1.7942133975397774	-0.7937184498706314
83.0	2.177965235678035	0.9996939396387012
83.0	-0.5436625121412797	2.522215961796425
83.0	-2.2325539857168843	-1.0464434063847468
84.0	0.08298614452141537	0.4413399849206821
84.0	-0.3347315586671806	0.4295466236922076
84.0	-0.40110494239912575	-0.8797929845535711
84.0	0.6528503565449013	0.008906375940677974
85.0	-1.907659072616012	0.859574529975021
85.0	-2.400208458512305	-2.948830292305491
85.0	2.5902979807489594	-0.3938841768078838
85.0	1.7175695503793453	2.483139939138344
86.0	0.39533019727662455	2.928945433903249
86.0	-0.9164903442310581	2.7518007931833006
86.0	0.52116014695443	-5.6807462270865585
87.0	1.534873087380317	3.8592052515108093
87.0	-2.899429253628958	-1.7325616488904405
87.0	-2.4464600342247436	-4.0585968096700675
87.0	3.811016200473377	1.9319532070496908
88.0	-1.1389489874499654	-5.595210157788621
88.0	2.350276759232997	-3.2384094823988283
88.0	-0.02554133469469777	3.8929061646091885
88.0	-1.1857864370883362	4.940713475578272
89.0	2.0692298189336196	0.15470727416582086
89.0	-0.5922290537161718	1.5688778302336595
89.0	-0.9314635460837353	0.8399945005567362
89.0	-0.5455372191337086	-2.5635796049562103
90.0	7.51743661127141	2.0785976750976793
90.0	-0.3109871532392946	6.114408388461474
90.0	-7.18711273866807	3.167648393731267
90.0	-7.554893556269827	-12.323017254231631
90.0	7.535556836905777	0.962362796941199
91.0	-1.4875843039381673	-0.19542510307807875
91.0	1.04000425621675	-0.24396716521598405
91.0	1.3504994331655804	0.24248056995004974
91.0	0.5052929646270556	0.3530749188902139
91.0	-1.4082123500712034	-0.15616322054620577
92.0	-2.451450342782311	-3.1882360202856272
92.0	4.928791513997176	0.2778240437143171
92.0	-2.477341171214885	2.9104119765713015
93.0	-1.0410715549322667	-0.5782612414408468
93.0	0.8860479308169519	-0.24252456420132157
93.0	1.2379265748283217	1.324477558604844
93.0	-1.0829029507130072	-0.5036917529626739
94.0	-0.05036832534738893	0.8741885338303341
94.0	-0.2091625651015849	0.20234331452046034
94.0	0.25953089044898875	-1.076531848350808
95.0	-1.10678145049607	1.5736792612813175
95.0	-1.9016215409067274	-6.947676731793667
95.0	3.437824648566448	3.1248855728009093
95.0	-0.42942165716365366	2.2491118977114537
96.0	0.16876703476808824	-2.0511802983597676
96.0	2.3593717566608063	-0.0886676525520696
96.0	-0.4783930283125183	1.8087035460887242
96.0	-2.049745763116378	0.33114440482311963
97.0	0.23095190010338615	0.27883944778341396
97.0	0.009678440675973343	0.31438303336531925
97.0	-0.2406303407793587	-0.593222481148749
98.0	-0.12585436933263383	1.5509877066138995
98.0	-0.05843639641789855	-1.5923262643962066
98.0	0.05833973792788982	-1.0852738717119779
98.0	0.12595102782265455	1.1266124294942763
99.0	0.8913495474638635	3.375314492518639
99.0	-1.492792726483698	-1.1963530840131475
99.0	-0.6400971743885084	-4.293268158340947
99.0	1.2415403534083331	2.1143067498354533
100.0	-2.9900750839221844	2.272451832232713
100.0	-2.6906987078249283	0.6101005116724985
100.0	-1.6165653106221338	-0.5253540951518659
100.0	8.434721282211582	-6.266860106896587
100.0	-1.1373821798423502	3.9096618581432283
101.0	-0.7132967002726993	-3.50165437882622
101.0	0.9479564444526589	1.5427407589057773
101.0	-0.23465974417997026	1.9589136199204336
102.0	-0.7082436967978233	-1.7463252434322523
102.0	2.3355934708245596	2.654357963467951
102.0	-0.44704391777943564	1.2270348646960512
102.0	-1.1803058562472877	-2.1350675847317437
103.0	0.1693626177918176	-0.26224029044798397
103.0	0.20010234834041082	0.2559565025191989
103.0	0.00048193803979712513	0.3987971622116179
103.0	-0.21879120446100878	-0.1581359542364872
103.0	-0.15115569971102097	-0.23437742004633982
104.0	4.418376199367621	-7.197467456718288
104.0	2.2593744319779105	4.753432156673323
104.0	0.35248816155726725	5.8723947121397195
104.0	-2.959205475311585	4.975017054280477
104.0	-4.071033317591216	-8.403376466375232
105.0	-3.367454533457903	0.5378274539480867
105.0	1.7960947057396113	-3.626864197613199
105.0	3.526950665401551	-0.5534389944318105
105.0	-1.955590837683257	3.6424757380969157
106.0	-0.48444399965500706	-0.07413600319712613
106.0	0.23030948361440912	0.01738788933279492
106.0	0.25413451604058057	0.05674811386432736
107.0	-0.7914786806525846	-1.1770570218740453
107.0	2.1180874989062444	-0.5127837898044965
107.0	0.30501297487241585	0.6507749400154892
107.0	-1.6316217931260686	1.0390658716630807
108.0	-0.024393466969567797	-0.19789176071322837
108.0	0.1675744639172262	0.057551683419446206
108.0	-0.14318099694765715	0.14034007729378548
109.0	0.3661931558377131	1.960387566268544
109.0	-2.1261375503862627	-0.08096760521460306
109.0	0.25837630027900566	-0.9271676870497597
109.0	0.355465624611629	-0.9117227135366613
109.0	1.146102469657914	-0.04052956046752673
110.0	3.110092922564614	4.537781211886173
110.0	2.5067200754569625	4.306015843288488
110.0	-3.9386951366986276	-2.6990200461437777
110.0	-6.982337322764227	-9.427140467902689
110.0	5.30421946144125	3.282363458871801
111.0	4.416704433184527	-2.0476343074743353
111.0	5.061666031543616	2.0175142418288674
111.0	-4.842353547093466	2.050843311658587
111.0	-4.636016917634718	-2.020723246013138
112.0	-6.515517927328455	0.9397046417348167
112.0	1.1004711982013868	-3.0936790052141903
112.0	3.9873348531109722	-4.088468516066207
112.0	5.441865170800112	-1.198181538625028
112.0	-4.014153294784023	7.440624418170609
113.0	-0.9351048811620386	-4.327306247759642
113.0	0.08417138928083157	-4.088191369954679
113.0	5.743722567268007	7.011642830264189
113.0	-4.892789075386785	1.403854787450156
114.0	0.3653092862449392	-2.421069580414885
114.0	0.22092151641275676	1.088953155890457
114.0	-0.5862308026576724	1.3321164245244377
115.0	-0.09516611967319671	-0.4131709346992348
115.0	0.5547036293664783	-0.1154461528923055
115.0	-0.45953750969329477	0.5286170875915338
116.0	-0.565177220622004	-0.36847813558503334
116.0	-0.10712969425361171	-0.46231534999560825
116.0	0.6723069148756157	0.8307934855806416
117.0	1.3504006226991476	-1.1598163966706156
117.0	0.7736361092860184	1.491508447193285
117.0	-2.124036731985166	-0.33169205052266926
118.0	-3.9396404357751105	10.438197998442803
118.0	-4.872504586765726	3.3435202887571003
118.0	1.6831571130448963	-6.313700207330736
118.0	3.6536761683826855	-6.78462520318592
118.0	3.784697170909412	-6.331521261395418
118.0	-0.3093854297961629	5.6481283847120825
119.0	-0.7947032819722359	2.269194248282935
119.0	-3.4958084687673465	0.20975876248575265
119.0	-4.537100389581177	-2.9460038579343837
119.0	4.8391643216026194	-0.4496992105707496
119.0	3.9884478187180834	0.9167500577364565
120.0	-4.25892703135171	0.6223961905167792
120.0	3.3388500035682886	-2.449424753365199
120.0	6.227484588753591	-0.1960746121951522
120.0	-5.307407560970184	2.023103175043579
121.0	-0.3502063037948211	-0.5846795753505892
121.0	0.814439599525707	0.057791055072358
121.0	-0.4642332957308836	0.5268885202782454
122.0	-3.6068712853494636	0.4247694353016125
122.0	-1.4935372819304775	-2.561943344688388
122.0	5.29277654604801	0.2716769665911074
122.0	-0.19236797876806977	1.8654969427956662
123.0	1.6285447490940395	0.23907075749747309
123.0	-1.2286718379758503	0.8879231081665448
123.0	-1.023500435507896	0.3812586474359146
123.0	0.6236275243897105	-1.5082525130999385
124.0	-3.7966339193926104	2.1654412654711104
124.0	-3.455269173851887	-5.15773379322759
124.0	-2.635361065187818	-5.553737709930139
124.0	6.741686126142221	3.1758822319768494
124.0	3.1455780322900933	5.370148005709783
125.0	-6.780776629346183	3.422148687910469
125.0	-7.241027517993405	2.1803318065094666
125.0	3.46591361970464	-3.304519099742172
125.0	10.555890527634975	-2.2979613946777757
126.0	-1.7148019731118502	2.5342095616461977
126.0	-1.225838611760444	-0.6136900527257486
126.0	2.940640584872277	-1.9205195089204516
127.0	3.8183989816129955	-4.049209334198968
127.0	4.95084500028238	-1.0289536003463264
127.0	-5.53471545572548	7.2937271883908465
127.0	-5.828081438473424	2.0666580565721766
127.0	2.593552912303533	-4.282222310417741
128.0	-6.78164088434998	7.365131612935295
128.0	-7.514517171130329	6.768483898551205
128.0	1.647446800525737	-3.7918188212572956
128.0	7.9323464386272065	-7.723320503541132
128.0	4.716364816327407	-2.6184761866880786
129.0	0.14863931510160294	0.21933608867146084
129.0	-0.11461193476948271	-0.07832608996183003
129.0	-0.03402738033212226	-0.14100999870963762
130.0	0.36778084198930555	-0.24253330658740682
130.0	-0.1571792234802535	0.19350842168415325
130.0	-0.21060161850905765	0.04902488490324801
131.0	0.07051690350560058	-0.09331407115094059
131.0	0.027209620408744962	0.0685657290330199
131.0	-0.09772652391434554	0.024748342117920687
132.0	1.2070130828180536	1.346947597865932
132.0	0.19099392530589232	2.161140700734808
132.0	-1.1146595182474015	-1.8248589313660348
132.0	-0.2833474898765482	-1.6832293672346914
133.0	-3.509181853868019	-3.615256612798761
133.0	7.473813489117141	5.13496241637036
133.0	-3.9646316352491495	-1.5197058035715902
134.0	-0.17150824242003887	0.5307607698583837
134.0	-0.20901942653351935	0.5444483431583319
134.0	0.08688116861863536	-0.6223433559874466
134.0	0.29364650033491485	-0.4528657570292629
135.0	-0.863473573315723	-1.1083164488354407
135.0	-0.8734545479603952	-3.5835139191763288
135.0	0.8928243137797536	2.1930396998216604
135.0	0.8441038074963887	2.498790668190124
136.0	3.754854416314702	-0.3003430415656315
136.0	-3.899324007017408	4.397576463520554
136.0	-4.479796911439246	3.8131714925969904
136.0	-2.3669777674887404	0.03749885735836078
136.0	1.2021142853256679	-3.506319877606212
136.0	2.0143512270707102	-4.001799965655417
136.0	3.7747787572342903	-0.43978392864863614
137.0	3.391955753476622	-3.8357183261182612
137.0	4.149413739012116	-0.6584798577859435
137.0	0.9751136421830102	5.978320949060461
137.0	-8.516483134671757	-1.4841227651562523
138.0	0.4736260890850511	0.9811672002217069
138.0	-1.185677203356578	-0.9089340690889252
138.0	0.7120511142715402	-0.0722331311327773
139.0	4.3063348615254595	1.7962177771352865
139.0	-1.4610906178157692	1.0041187661038633
139.0	-3.577265064037477	-0.357118303051556
139.0	-3.7837556003153945	-4.043135168413186
139.0	4.5157764206431805	1.5999169282255987
140.0	1.3599388255916165	1.0231390988420053
140.0	-0.13614044808312276	2.939846437328248
140.0	-1.265993845085141	-2.10619770641594
140.0	0.04219546757665338	-1.8567878297543101
141.0	11.048945163050364	8.709292742559764
141.0	-9.644832746885397	4.753483689251418
141.0	-13.394229107479871	-2.941406720871231
141.0	-12.08319371352756	-8.456828908559196
141.0	-3.076983512133021	-6.321584224969307
141.0	7.476529077325026	-1.2155160073063793
141.0	8.228362224514445	-0.5507363571895076
141.0	11.445402615135905	6.023295787084406
142.0	0.1177088014498926	-5.311834760278955
142.0	5.1979736369423355	3.0062326500721817
142.0	1.089153449432131	7.826113519601704
142.0	-3.400186186915305	-0.21503714045367772
142.0	-3.0046497009090682	-5.3054742689412295
143.0	-3.4603412770856243	7.436921420084472
143.0	-5.144590057028644	7.306154912725742
143.0	2.029596915176072	-5.54965894734373
143.0	2.34358877378964	-5.7731534503359825
143.0	4.231745645148552	-3.4202639351304858
144.0	9.011988860776016	-5.638112359518412
144.0	9.688745516952935	7.72732281393868
144.0	-3.096087168189934	4.302276810291774
144.0	-10.864525699717056	0.942897616481889
144.0	-10.94879666911907	0.07942984073437387
144.0	6.208675159297103	-7.413814721928265
145.0	-1.8715967480896534	-0.07630421955759178
145.0	0.993515738479403	-1.411591980634789
145.0	0.8780810096102504	1.4878962001923808
146.0	6.111878567192066	11.729395668918817
146.0	-4.6018418416228215	-1.142712029649865
146.0	-4.301032058399914	-4.105236746902864
146.0	2.7909953328306774	-6.4814468923660895
147.0	-0.5341577964448685	1.3702198519399738
147.0	-1.4088561410112703	-1.1510488122972227
147.0	1.9430139374561353	-0.21917103964275736
148.0	2.6571507980147913	0.07515463006535428
148.0	1.5726393184775282	2.067158264703007
148.0	-2.3945803931462475	1.784217452707487
148.0	-1.835209723346082	-3.926530347475859
149.0	1.806811934821582	-3.1540753103798904
149.0	4.526860083852946	-1.5878137866758122
149.0	3.928250608961628	1.719248024077235
149.0	-5.011393299573766	4.666336211592582
149.0	-5.250529328062392	-1.6436951386141068
150.0	-0.9710626445996857	0.5112361311868061
150.0	-0.2537064348859521	-0.7645173432360104
150.0	0.6626618215187414	0.05874869047596604
150.0	0.5621072579668965	0.194532521573238
151.0	-2.4002663038044902	3.3318944857333306
151.0	-2.200318726849214	-6.004273403680757
151.0	2.4400058765426165	-0.5609608174014384
151.0	2.1605791541110797	3.233339735348852
152.0	0.2129626160349015	-0.3750664987930719
152.0	-0.0766990955624737	0.6971074214009083
152.0	-0.253007690612635	0.10061581354382317
152.0	0.11674417014021612	-0.42265673615168686
153.0	2.090063723170143	-2.7697500800709864
153.0	2.1497917905023467	-2.60697803058107
153.0	0.9718075010415582	5.416625001838675
153.0	-2.846559181769029	4.426498353392408
153.0	-1.6935555295687428	-1.7635912785276961
153.0	-0.671548303376279	-2.7028039660513676
154.0	0.09046940599546116	2.6317252621151788
154.0	-3.2125322040836943	-1.3415716195624117
154.0	0.5509491756077886	-2.2684216030254065
154.0	2.571113622480435	0.9782679604726284
155.0	-1.3772218171304798	-2.7989555838138402
155.0	1.6481870840813315	1.8511068807594033
155.0	1.2215607505347288	3.3581633088468505
155.0	-1.4925260174855814	-2.4103146057924154
156.0	-1.0479423435801054	-0.15342614213217265
156.0	0.9760813520599383	-0.5028829551330913
156.0	0.6828531102574309	0.004525673701512162
156.0	-0.6109921187372155	0.6517834235637345
157.0	2.9192609666071534	-0.07187377413812507
157.0	-0.49008476988621197	2.1549416116041313
157.0	-2.580343633787139	-0.7814203794589722
157.0	-2.4877742357411545	-0.8369447461960542
157.0	2.638941672807366	-0.4647027118109775
158.0	-0.38511521542264293	3.2994372053587493
158.0	-1.7379508181956886	2.711260631974735
158.0	-1.7359023242756106	-2.466375101672761
158.0	1.8847371311044308	-5.426448823311695
158.0	1.9742312267894775	1.8821260876509998
159.0	-0.504858336711614	1.3578503815603988
159.0	-2.013813811398318	1.3488600886413662
159.0	0.9748322219627502	-1.9956389349840618
159.0	1.5438399261471945	-0.7110715352177188
160.0	-6.046884549483811	7.9673923348453135
160.0	1.223807219781425	-5.276768794919907
160.0	4.823077329702383	-2.6906235399254204
161.0	-1.7309008634914478	0.5551357436915826
161.0	-1.6534221995110392	0.3069146874474247
161.0	1.4541701367405604	-1.4870633977919334
161.0	2.8364568598000104	-0.5148468292808934
161.0	-0.9063039335380803	1.1398597959338335
162.0	2.001564322600745	-1.3238552364340062
162.0	-0.08564741851083013	1.736326634083412
162.0	-1.5167079497262776	1.619837338276482
162.0	-0.39920895436364034	-2.0323087359258523
163.0	1.2931647881720827	-0.6273955739494858
163.0	3.120372625713748	0.3380510580343832
163.0	-0.9011009061118413	0.22529572667619913
163.0	-1.6619874413703302	0.16127838479910572
163.0	-1.8504490664036641	-0.09722959556017707
164.0	-0.49674724026645	2.760108841335695
164.0	-2.9265027299505038	2.7699519376983144
164.0	0.6982047145128731	-4.312511072191109
164.0	2.725045255704025	-1.2175497068428909
165.0	-2.182573823348533	1.2860181626393978
165.0	-1.9690211367185873	-0.9141593805194943
165.0	1.2470487900218372	-0.5251418937686302
165.0	1.5031732979061776	-0.42085457778526636
165.0	1.401372872139085	0.5741376894340027
166.0	1.4656617818775777	1.0871087912044592
166.0	0.3250774019034336	1.910557484722333
166.0	-1.2666627586489316	-1.2235828056997193
166.0	-0.5240764251320664	-1.774083470227064
167.0	2.7486130549567944	-4.445415176833246
167.0	3.938594242564806	-0.2943048837073532
167.0	-0.9435685282559545	3.205869620120927
167.0	-2.7380102190849467	1.8513874832475006
167.0	-3.0056285501806923	-0.3175370428278266
168.0	1.8321935241318354	0.5468773220697501
168.0	-0.26732350034015073	1.644231997636729
168.0	-1.79296161412322	-0.3722911741013731
168.0	0.22809159033155538	-1.8188181456050898
169.0	1.0839387744792177	0.17054952099986642
169.0	-0.47515585548679273	1.1323537976926137
169.0	-0.6087829189924304	-1.3029033186924888
170.0	-1.57904747932926	2.5325551671787516
170.0	-2.83685735808641	-2.029366375513196
170.0	-0.28393081351284133	-3.488774909867823
170.0	2.2649490324179355	1.1767007124520228
170.0	2.4348866185105797	1.8088854057502304
171.0	-0.6104157202727405	0.7836171352746584
171.0	-0.6530436701286996	-0.009530452432683023
171.0	0.4884467167699583	-0.42919814931793665
171.0	0.7750126736314791	-0.3448885335240291
172.0	-2.8601929583527204	-3.8408494082707576
172.0	2.853866733132925	-5.987350777919302
172.0	3.6156203468835044	-5.091572898973439
172.0	1.8003115456168863	0.9346418432128671
172.0	-1.7285631810421664	6.97956265524636
172.0	-3.681042486238431	7.005568586704257
173.0	-0.32821000762210806	4.4400800319790426
173.0	-1.9139727483979103	1.8541855580133644
173.0	-0.769315248973059	-2.346610244478542
173.0	-0.29127467732238854	-2.5098394168919183
173.0	0.7693227726224878	-2.1350464575600236
173.0	2.5334499096930005	0.6972305289380737
174.0	1.6490641745952361	0.27383058416042205
174.0	-1.0460838994258377	3.0494737755044374
174.0	-1.4002141479281347	-1.548239646178791
174.0	0.7972338727587082	-1.775064713486053
175.0	0.16973937258858218	1.1342218890314828
175.0	-0.4145155418571034	-0.7939815501449312
175.0	0.24477616926852191	-0.3402403388865499
176.0	1.5037896518004379	-0.7438079678070348
176.0	-0.9775660393374339	2.0004769515179133
176.0	-0.5262236124630075	-1.2566689837108818
177.0	-3.524328622154003	6.370827799177507
177.0	-5.255985330780005	1.037062300255948
177.0	-2.4724834021587836	-2.5898552838840714
177.0	3.586040473093212	-5.192459730116132
177.0	7.666756881999612	0.37442491456674576
178.0	-0.15378509363493983	-0.022321719215946882
178.0	0.19820410844720657	-0.2675709336126688
178.0	-0.04441901481226523	0.28989265282860155
179.0	1.6499924713084917	0.716019197535122
179.0	1.2997715656908646	1.0313250200141815
179.0	-3.4431028622044595	0.6142620584003671
179.0	0.4933388252051002	-2.3616062759496734
180.0	5.443427303424771	0.17902810610946462
180.0	-5.261763643584931	4.083508870648607
180.0	-7.176026190325974	3.4338590167091887
180.0	-7.8453022937274	2.8997016252284364
180.0	7.356408257168278	-5.327216869044971
180.0	7.483256567045255	-5.268880749650729
181.0	0.11933382460347584	0.022724642361586417
181.0	-0.07859657181904958	0.040235471779623236
181.0	-0.04073725278442625	-0.06296011414120965
182.0	-1.9897141724255831	0.2732074972362767
182.0	0.5675288018560568	-1.1522387795469484
182.0	1.4221853705695278	0.8790312823106707
183.0	10.29892697638512	4.099573004659292
183.0	11.062416051236262	5.575044346809675
183.0	-9.717473142570839	2.1201346478339786
183.0	-8.994493229708459	-3.85286142100587
183.0	-2.6493766553421008	-7.941890578297083
184.0	0.8890885403058479	2.2894114178584575
184.0	-3.9081194812740288	1.0384315655817535
184.0	0.9836405341570718	-2.467284381008547
184.0	2.035390406811122	-0.8605586024316552
185.0	-0.13343813724629328	1.1986611203855444
185.0	-3.4803451113849455	0.4605489509584897
185.0	1.8098471752920018	-1.3467071166959597
185.0	1.803936073339243	-0.31250295464808575
186.0	-0.04675875039270298	-0.054269452180108375
186.0	0.06901082245245183	0.02420752970344906
186.0	-0.022252072059749613	0.03006192247667394
187.0	-1.247801985462674	-2.7118261635568977
187.0	2.159265584165436	-0.05813612744513885
187.0	1.994463638387944	0.4387750645497588
187.0	-2.9059272370907183	2.3311872264522844
188.0	0.13112161983455117	0.11917187794656907
188.0	-0.2777990837405261	0.06965838629537482
188.0	0.1466774639059714	-0.1888302642419437
189.0	4.65623752136928	1.6524141935500738
189.0	-4.4615310872478275	1.7311453594237252
189.0	-4.401501234676408	-1.712729167365001
189.0	4.2067948005549605	-1.6708303856087934
190.0	-1.3900050050701347	2.723241894721167
190.0	-4.928606612095855	0.6275404602420125
190.0	-1.7190175080081944	-1.1571033236518955
190.0	1.9873759484218323	-2.298715525525372
190.0	3.1697554812065496	-1.2410663838387157
190.0	2.8804976955458805	1.3461028780528383
191.0	-2.043684570533543	-0.9910122950342474
191.0	0.41853410390950163	-2.7339025990768575
191.0	1.4385969484338421	1.5847220313534498
191.0	0.1865535181901985	2.140192862757665
192.0	1.451420878010361	-2.194299866937661
192.0	2.0020010845248386	-1.5623808363612417
192.0	1.0341407352100755	3.529644566511329
192.0	0.5475786446438741	2.9868517324809143
192.0	-2.2818223434673164	-0.5275612947322076
192.0	-2.7533189989218325	-2.232254300961161
193.0	2.826036243521467	1.8298573846807036
193.0	0.15442418849756767	2.9836868530519354
193.0	-1.3174659757070923	2.3072496451492355
193.0	-2.3504630749784923	-1.0196483079296397
193.0	-1.2793694491973953	-2.386802980675743
193.0	-0.6713216668141477	-2.8414623975928075
193.0	2.638159734678103	-0.8728801966836935
194.0	1.6916329655423366	1.0736621695963906
194.0	-0.8214163640793974	0.3135755546502712
194.0	-5.355538515411602	-1.6087919586889554
194.0	1.2737429672553644	-0.6787649892983787
194.0	3.211578946693299	0.9003192237406465
195.0	7.116205897409671	-1.1328993347395362
195.0	-2.974610469540533	2.8563097612213144
195.0	-3.972259211025849	1.5031199660215542
195.0	-4.172698533245078	-0.11525331728296928
195.0	4.003362316401801	-3.111277075220372
196.0	-1.7260740005418684	0.1388039552124909
196.0	-0.7336602119869069	-1.2951052429312016
196.0	0.5530437112496798	-0.7782137111851788
196.0	0.9397708549679218	0.22575667879514266
196.0	0.9669196463111779	1.7087583201087468
197.0	2.004979944518259	-1.1884679464180208
197.0	-0.6594632249206742	1.1837374652928543
197.0	-1.3455167195975872	0.004730481125164165
198.0	2.8969405177325087	0.4786696961754726
198.0	-2.991351551608369	2.547857651057731
198.0	-3.9475550903799004	1.679323793557391
198.0	1.9359261799512009	-2.3436202954813687
198.0	2.1060399443045554	-2.3622308453092193
199.0	2.6207983112857294	-2.6418436952342548
199.0	1.595388292744733	4.367441645372232
199.0	-3.221227611160436	0.7543580939474614
199.0	-3.199713098768331	0.38564244672013226
199.0	2.2047541058982953	-2.865598490805559
200.0	2.129600172164331	7.463517160049065
200.0	-8.541121395705845	-0.680707234325375
200.0	-3.50089915012189	-3.9237214356940653
200.0	1.043131526543868	-4.697792510405242
200.0	8.86928884711954	1.8387040203756184
201.0	-0.7833433557326681	-0.08520601733067495
201.0	0.536924535912972	-0.5270873420022142
201.0	0.24641881981968355	0.6122933593328956
202.0	1.4757037449956596	-0.36215296452953916
202.0	-3.020626355243886	1.569592713368816
202.0	1.5449226102481983	-1.2074397488392812
203.0	-1.3876488520975996	-0.09446379620632633
203.0	-1.217537293417083	-1.3735376823846992
203.0	1.4970986838741351	0.6010206425139849
203.0	1.1080874616405474	0.8669808360770406
204.0	0.21125629674913915	1.6199942063443744
204.0	-2.657469696089265	-0.9384617799043229
204.0	0.2861748399188865	-1.821920547835031
204.0	2.1600385594212335	1.140388121394976
205.0	-4.545168180978632	3.6154597198011333
205.0	-7.62593979456568	1.6227393193994408
205.0	3.2590653106924696	-3.938575739759295
205.0	5.039486462586947	-2.5160473901712086
205.0	3.872556202264911	1.2164240907299284
206.0	-1.456231814401936	2.556283391530189
206.0	0.017750808813990715	-1.3777137198080112
206.0	1.4384810055879518	-1.1785696717221807
207.0	2.5129850678701904	0.881850455938182
207.0	-1.2855504349786293	3.300681147830176
207.0	-1.2274346328915788	-4.18253160376837
208.0	0.9840576286306246	-0.17355046115473446
208.0	0.7953447962460469	0.9176636206847205
208.0	-2.161258396922204	0.7383273920567657
208.0	0.3818559720455469	-1.4824405515867507
209.0	5.296694440752892	-2.4184609372319894
209.0	6.100237016520914	5.504993280540378
209.0	3.6679661942527675	7.094974438859685
209.0	-10.06269304007779	-0.7125037086894093
209.0	-5.978762577259102	-5.136605725430576
209.0	0.9765579658103438	-4.332397348048018
210.0	-1.0102422356108849	2.07091636837354
210.0	-1.7286120964234069	1.5061661998837486
210.0	-0.555545510770817	-1.7233569792019805
210.0	-0.31101152490127937	-1.8461206460905242
210.0	1.883796313601641	-0.10533752150239861
210.0	1.7216150541047537	0.0977325785376133
211.0	-0.002439294008025646	0.0012444095070808276
211.0	0.0009067376921256059	-0.0077646640957297315
211.0	0.0015325563158911726	0.006520254588660008
212.0	-0.3900972769362938	1.5452403010413482
212.0	-1.4023948437135678	-1.2008369533282768
212.0	1.7924921206498534	-0.3444033477130781
213.0	0.7697325128533434	-0.17347057255395137
213.0	-1.22573081684584	1.331288224737025
213.0	0.4559983039924916	-1.1578176521830785
214.0	-1.3621131737309669	-2.7462384036453833
214.0	3.684848642003411	3.5763605634950784
214.0	0.10324625278177661	1.8055852740981555
214.0	-2.4259817210542507	-2.635707433947862
215.0	-6.014176253227211	4.119710021241705
215.0	-2.426289032333693	-1.9550065021875869
215.0	3.556021259586163	-4.372551357474394
215.0	10.699086381880663	-3.8299905645000862
215.0	-5.814642355905937	6.037838402920349
216.0	0.056967769728347994	-1.2103664306859
216.0	0.9232813764920726	-0.9038077589553033
216.0	-0.2154065725368896	1.170054384495029
216.0	-0.7648425736835276	0.9441198051461803
217.0	6.638129261118119	3.2576417633670545
217.0	2.136713277184786	3.923971850223257
217.0	-7.523442673458462	-1.7923578750400488
217.0	-8.094793498004393	-7.039757598456404
217.0	6.8433936331599465	1.6505018599061376
218.0	2.0330788050599122	2.67696787034103
218.0	-2.090273988225731	-0.5421900603268459
218.0	-3.607440839072729	-2.0147376862178237
218.0	3.6646360222385423	-0.120040123796338
219.0	-0.151943799759562	0.41774371168520186
219.0	-0.13737397828169073	-0.8949256304857944
219.0	0.2893177780412343	0.47718191880061445
220.0	0.13626635890418393	-1.5627512575654594
220.0	0.643132920944645	-1.2207511379763387
220.0	0.8572756940873453	-0.5936704605021692
220.0	-0.07853085211817135	2.2018870600109706
220.0	-1.5581441218179872	1.1752857960330005
221.0	1.678397554549019	-1.601155527536365
221.0	1.5401406533991442	-1.0291413595827212
221.0	-1.273109505826299	1.6457826438772338
221.0	-1.9454287021218237	0.9845142432418075
222.0	-0.8785195436388212	-0.01916957021804594
222.0	0.6663922802115476	-0.17457772463278654
222.0	0.21212726342725027	0.19374729485081615
223.0	-1.6845129733982143	-0.11502111682641847
223.0	1.0861587703254583	-2.7473812626754066
223.0	0.5983542030727365	2.8624023795018045
224.0	9.376689358935991	-3.9171873006342723
224.0	-0.46649781099178755	11.67403288284836
224.0	-10.823025295985664	2.6749624013075914
224.0	1.91283374804145	-10.43180798352171
225.0	2.0932495562939915	-0.04656375684060887
225.0	0.011684268828017152	0.7765000439941694
225.0	-1.0100411969320353	0.2902109455273417
225.0	-1.0948926281899773	-1.0201472326809082
226.0	-1.769947219419799	-1.1804325254441448
226.0	1.8730442122913384	-3.108975851201892
226.0	1.5709518387009216	5.071432826194442
226.0	-1.6740488315724604	-0.7820244495483913
227.0	-2.1007767689341055	0.709816777489781
227.0	1.9029956149250902	-1.5962654893889363
227.0	2.0269259801713364	-1.553836787127822
227.0	-0.16149949464419408	1.0139893329813603
227.0	-1.6676453315181259	1.4262961660456102
228.0	-0.4734659914275288	1.0843835652011138
228.0	-0.9004091715808733	1.4012463641311699
228.0	1.3738751630083903	-2.4856299293322754
229.0	2.3694115268587383	4.349483174565876
229.0	-2.1244832456450577	-0.17249391832202088
229.0	-2.1386232672633314	-0.38295139633403164
229.0	1.8936949860496457	-3.7940378599098254
230.0	1.3431163415374847	0.7451177454909107
230.0	-2.102247581015955	2.504641081041684
230.0	-1.9925055844280442	1.3078938692589683
230.0	1.1739834879347875	-2.2395223356044567
230.0	1.5776533359716967	-2.318130360187097
231.0	-3.6561432702422207	1.5204571341600215
231.0	-3.5128048510048244	1.2561535690774805
231.0	2.037459804846262	-3.6858220073485866
231.0	5.430397207958061	-1.0155001487402884
231.0	-0.2989088915573055	1.9247114528513882
232.0	-1.238083266573316	2.0149822480950648
232.0	-1.7831026786913866	-1.4966296917260695
232.0	1.787544667484608	-2.1300695959320315
232.0	1.233641277780106	1.6117170395630178
233.0	9.402242039455135	1.5575449013621667
233.0	4.15927984251348	3.8498161522795677
233.0	-7.599874764885875	-0.8389078330804591
233.0	-5.961647117082753	-4.5684532205612856
234.0	-0.991081453549721	-2.4489262624636847
234.0	2.0647841279528993	1.8995971909441416
234.0	1.9100466034018868	2.450973032306579
234.0	-2.983749277805076	-1.9016439607870375
235.0	-0.5921078944521294	-0.46366848644923747
235.0	1.1345497560194704	-0.06956419430806415
235.0	-0.5424418615673383	0.5332326807573217
236.0	-0.5755623645465239	-0.9220231709048781
236.0	0.7653585266973549	0.2281755089943152
236.0	-0.1897961621508233	0.6938476619105612
237.0	0.20338476958621632	-2.5789829369825203
237.0	1.3863645051338016	-2.3298660524565635
237.0	0.584770368366621	5.739331013313136
237.0	-2.174519643086651	-0.8304820238740858
238.0	-5.446830358506062	1.494750665477051
238.0	6.002723176542762	-5.893725567356916
238.0	4.089887205266837	0.21220589704659742
238.0	-4.645780023303538	4.186769004833268
239.0	1.5486145281521007	1.5341000138572505
239.0	-1.0207302681228094	-0.4263732620845584
239.0	-0.5278842600292897	-1.1077267517726852
240.0	-2.6415855845144782	-1.729908522578278
240.0	2.0257469794742673	-3.135010020850483
240.0	2.488479524475628	1.2766451933520062
240.0	-1.8726409194354208	3.588273350076749
241.0	3.36574769154989	-0.5349186104464178
241.0	3.8310132490495725	-0.1461779505824905
241.0	-1.9343295646275296	1.5906679630448395
241.0	-3.0989788451068696	0.44309469401982254
241.0	-2.16345253086506	-1.352666096035768
242.0	-0.09434812822674832	-1.8278835214792866
242.0	2.2241866807375223	0.6226213427056033
242.0	-2.1298385525107815	1.2052621787736835
243.0	-3.5874545553121706	2.6975783280511765
243.0	-6.2155753333109764	-2.1516306447433826
243.0	9.827014218288687	-3.446574180954023
243.0	-0.023984329665517057	2.9006264976462286
244.0	1.957010274547286	1.9460685041635717
244.0	-0.9096814490682017	3.1676337676154835
244.0	-1.5266635205205579	-2.8034530920967375
244.0	0.4793346950414764	-2.3102491796823155
245.0	2.6549486907588755	-5.513854440213581
245.0	3.244961621206254	-5.4342176832041735
245.0	3.5149042103721837	4.732663043946123
245.0	-9.414814522337341	6.215409079471626
246.0	0.2634860294730848	0.48271539054378954
246.0	-0.7391246897184652	-0.23602455528888713
246.0	0.475638660245384	-0.24669083525490304
247.0	-2.6469379086702185	0.6907107960218436
247.0	-2.1026472895610646	-1.775445018471864
247.0	4.749585198231273	1.0847342224500176
248.0	0.030170337954752297	0.44109206431803627
248.0	-0.334888887938322	-0.30935063451757583
248.0	0.30471854998356285	-0.13174142980046233
249.0	-0.2795335553053877	-1.7831269582357607
249.0	0.957299400987015	-0.8433466878297334
249.0	0.8506181015722835	0.5404971738821059
249.0	-1.5283839472539147	2.085976472183382
250.0	1.976429907297478	-4.1361091114624875
250.0	1.4507433442041107	5.266281094356788
250.0	0.5316785695265929	5.242728183269207
250.0	-1.7333201949667711	1.3154934811174444
250.0	-1.587517333154071	-1.4445845553537493
250.0	-0.6380142929073513	-6.2438090919272735
251.0	-10.607638396746108	0.9124978446672936
251.0	-11.759837602653656	-3.655555832857263
251.0	-3.9067903876085235	-2.7608173085064815
251.0	9.667784922052814	0.8514270206550894
251.0	9.82390129637746	1.617699340110641
251.0	6.782580168578017	3.0347489359307023
252.0	-2.996085093011255	3.796803579400317
252.0	-4.483519134333423	1.8084903680491324
252.0	2.6657941480709213	-3.8543193560430713
252.0	4.813810079273751	-1.750974591406393
253.0	1.9115536881142874	4.228983486236303
253.0	-1.8630366726297556	4.830287362789861
253.0	-0.33144150481707624	-4.791678537036449
253.0	0.28292448933254133	-4.267592311989711
254.0	0.7158372973452225	-0.03908989416275799
254.0	0.7477328622913622	-0.0024677891631501025
254.0	-0.986130822986661	0.08387389151702762
254.0	-0.4774393366498907	-0.04231620819109244
255.0	-3.8950680982871466	0.5769414470805145
255.0	4.9309452761489805	-5.052951352508515
255.0	1.2122998572859207	2.6784800819069825
255.0	-2.248177035147738	1.7975298235209984
256.0	3.8259826057788504	1.1910459557880355
256.0	-1.097657789138046	0.8544596470582111
256.0	-2.728324816640791	-2.0455056028462524
257.0	-0.6643999133312727	-0.4435328953103772
257.0	0.8055619986224554	-0.40674179132280275
257.0	-0.141162085291178	0.8502746866331665
258.0	0.6020002829962783	-0.2449046093619733
258.0	1.0402929746598581	0.7742531966929778
258.0	-0.9856642253319451	-0.11680879564655947
258.0	-0.6566290323241892	-0.41253979168445176
259.0	-0.34668955299468773	0.7907247913167019
259.0	-0.4294557543920824	-0.4190607245651426
259.0	0.776145307386763	-0.37166406675157165
260.0	3.6335753591295443	5.341534834302542
260.0	1.0795740628335655	7.551486776853379
260.0	-11.693595099587615	-1.7329063386354635
260.0	6.980445677624525	-11.160115272520429
261.0	-1.2936906442012024	-6.0916963611602055
261.0	6.156505971334175	-3.3012967937677637
261.0	7.78729434332084	1.3829776368272972
261.0	-5.566892137017771	4.680049326838511
261.0	-7.08321753343605	3.329966191262189
262.0	0.14145766486500055	3.9902625324950303
262.0	-3.9318339380721548	1.4668159107827294
262.0	-4.053467676755282	0.23026416485772994
262.0	3.047715661129521	-3.1488780058113663
262.0	4.79612828883295	-2.538464602324111
263.0	-0.1038922177915228	1.9875834472815055
263.0	-0.31751366390234914	1.917947669426502
263.0	-0.2817969191181199	-1.592970117412729
263.0	0.11371386038276976	-1.4793147240954247
263.0	0.5894889404291784	-0.8332462751998436
264.0	4.576536969412401	3.594679200773635
264.0	-3.664158703918477	0.8504354841317266
264.0	-3.7571082188402594	-0.2693808054647414
264.0	2.8447299533463464	-4.175733879440571
265.0	0.7419972877890935	0.5723497811166665
265.0	0.08811536926726787	0.34528024046920314
265.0	-0.6932247795129154	-0.34270958063022905
265.0	-0.13688787754343856	-0.5749204409556266
266.0	-0.6512354796875389	3.4924015129401105
266.0	-2.69221031877666	3.7652968816783097
266.0	-4.479031023779529	0.18231568758090355
266.0	3.906419015660004	-3.7207853184095527
266.0	3.9160578065837495	-3.7192287637898085
267.0	-0.284914212618928	-0.19262459362938533
267.0	-0.23116139418277554	-0.23580866621028612
267.0	0.6825866620798093	0.26247347014158123
267.0	-0.1665110552781085	0.16595978969809683
268.0	0.021409108135605176	0.32260464275585354
268.0	-0.39395933737373	-0.0394150630927281
268.0	-0.2409306788048301	-0.5968243562223157
268.0	0.6134809080429648	0.3136347765591923
269.0	2.8486790985705657	2.837955659589358
269.0	-1.5348065634432213	0.9919069292673324
269.0	-5.246427245982776	-1.2251995259232806
269.0	-4.076477977971093	-3.831827067746895
269.0	8.009032688826524	1.2271640048134533
270.0	-2.983372215211959	-7.465875410645836
270.0	0.6037672220938259	-7.963159530050275
270.0	11.90804697011783	-1.4978810014262853
270.0	2.275090106296979	12.365657212753977
270.0	-5.900051962084952	2.290607793483812
270.0	-5.903480121211713	2.270650935884667
271.0	0.7259849990022463	-0.0417169769806533
271.0	-0.26984251437786955	0.5139845849498357
271.0	-0.45614248462437323	-0.4722676079691885
272.0	0.16640973651795984	-0.2954475248281435
272.0	-0.08586950840382329	0.4191686053478522
272.0	-0.08054022811413783	-0.12372108051970176
273.0	6.205667004104041	11.731481263372974
273.0	-5.593086230795565	-3.1046400497688635
273.0	-5.286790084250874	-9.8111587250633
273.0	-4.287995886498479	-9.766105093189967
273.0	2.748300556817627	-0.7842820614901077
273.0	6.21390464062329	11.734704666139308
274.0	3.4705386178132827	1.6960014957346243
274.0	-1.3664278768357851	-0.2959642774177326
274.0	-1.248801946956134	-0.7453354821265141
274.0	-0.8553087940213803	-0.6547017361903907
275.0	-6.351609350271898	7.542205306057958
275.0	-6.746405918503106	4.053671328246605
275.0	-6.333677310268717	-0.2143683410001338
275.0	6.144101799722163	-9.527238509336867
275.0	13.287590779321583	-1.8542697839675562
276.0	0.6074653888280176	0.2530956336622238
276.0	0.6090620649747988	0.2561505996687371
276.0	-0.7950422870901033	-0.13173016977826935
276.0	-0.4214851667127131	-0.37751606355269157
277.0	-3.4263665469616997	0.581362364606764
277.0	-2.213622429613666	-1.102712420317622
277.0	1.8401474277282173	-3.3813877020997785
277.0	3.799841548847149	3.9027377578106206
278.0	1.3711844206092123	4.839465153253249
278.0	-4.063794528324024	-3.2050426397880845
278.0	-3.4113616492300247	-4.760967223456536
278.0	1.3947640590258423	-0.6951710196155355
278.0	4.709207697919002	3.8217157296069084
279.0	1.051780817033673	-1.0456527191354934
279.0	0.6000175293074078	1.6195350275134355
279.0	-1.6517983463410761	-0.5738823083779478
280.0	1.4695882410205856	-0.6210311656852079
280.0	1.325730286694942	0.5555190038530088
280.0	-2.7953185277155117	0.0655121618322152
281.0	6.518918193120962	0.6334725140409749
281.0	7.65496652557241	4.582467476136727
281.0	-6.924202419749756	-2.347179119797776
281.0	-7.249682298943604	-2.8687608703799152
282.0	0.31220324235628283	1.9005560697771542
282.0	-0.7270066259625291	1.667350294221729
282.0	-1.4516622748757557	-2.150668043134816
282.0	1.8664656584820036	-1.4172383208640773
283.0	-3.490397513385967	3.750519096391795
283.0	-4.487986345193636	-2.668632532562061
283.0	-3.4909602798864814	-3.4198571660027057
283.0	-1.302401473907139	-3.519853302745484
283.0	6.211754788014882	2.0544174958968315
283.0	6.559990824358344	3.80340640902163
284.0	-3.1666824755399263	3.835531562314242
284.0	1.0915420554871647	-3.585981819878777
284.0	1.491926728106106	-2.6577692501484615
284.0	0.5832136919466748	2.408219507713035
285.0	0.16852857740687285	-0.04969456663796841
285.0	-0.0715580851739161	0.05270122807245726
285.0	-0.09697049223296855	-0.003006661434499503
286.0	-0.041019805546475406	-0.04847203236948497
286.0	0.0024038807800777122	-0.013520413339666526
286.0	0.03861592476639291	0.06199244570914624
287.0	-6.036226343929838	0.08633869610751477
287.0	4.081252741480976	-4.265955676265406
287.0	1.9549736024488582	4.179616980157893
288.0	2.795660987455022	1.5987008866182641
288.0	-0.6761377894761536	1.6479999753279226
288.0	-3.366100138621356	-2.3817030258573504
288.0	-1.6200781379794371	-2.4047882893603627
288.0	2.8666550786219425	1.5397904532715283
289.0	-1.0262223689634615	0.47839107584125384
289.0	-0.777597454770179	-0.1483193115547774
289.0	0.061617109156802685	-1.1575818918407135
289.0	1.3321734729313057	0.18058812553576964
289.0	0.41002924164553933	0.646922002018466
290.0	10.366214988942888	-4.29790140128591
290.0	-2.480527127634116	5.5458490773812565
290.0	-4.154683325130089	5.485434526306051
290.0	-3.7310045361786686	-6.733382202401396
291.0	2.0038965289158064	-1.0373884299171703
291.0	-1.0849885620626996	3.2226768501817897
291.0	-0.9189079668531136	-2.185288420264619
292.0	-1.5727273845285556	-1.121662441121816
292.0	0.4213870135645702	-0.31526658646271016
292.0	1.1513403709640107	1.4369290275845232
293.0	2.0801061964634577	-11.731893638009044
293.0	5.2203334314570045	6.063121271725398
293.0	3.109165572811124	13.86692209250772
293.0	-5.673702224039629	4.158109865283679
293.0	-4.735902976691932	-12.356259591507749
294.0	1.0142649654185414	0.11763965968701745
294.0	0.879838334539455	0.5642823080070019
294.0	-1.894103299958007	-0.6819219676940285
295.0	-0.49568627471262505	-0.6168242956470346
295.0	0.32292583463600694	-0.8159048046680591
295.0	0.2651270432820264	0.7990092725768466
295.0	-0.09236660320540077	0.633719827738238
296.0	1.952713349092587	0.29357949287328144
296.0	-2.4981279718542266	2.7819694283161636
296.0	-0.24001335408944519	-1.6215718332895346
296.0	0.7854279768510919	-1.453977087899907
297.0	1.0679181491950998	-3.538514489237864
297.0	3.0978198679648083	0.5387502104020302
297.0	1.5940570014245452	1.7504641709227102
297.0	-1.337257739303971	1.0697264277745062
297.0	-1.9825920436967293	0.6656482308572715
297.0	-2.43994523558375	-0.48607455071866057
298.0	0.5964057423462457	0.9624026250591562
298.0	-1.3692985933730821	0.4610258635480094
298.0	0.7728928510268407	-1.4234284886071444
299.0	-5.854045231907598	0.8853384806342148
299.0	-4.062110402118863	-2.675321356552524
299.0	-1.2457798152669828	-3.7611867974495503
299.0	5.358720597011247	-2.6354660040631117
299.0	5.803214852282235	8.18663567743095
300.0	-6.102726803397124	3.3337790133393317
300.0	-5.759125521064645	-2.2446631646520356
300.0	4.974601086252744	-1.5558918268675357
300.0	6.887251238209038	0.4667759781802532
301.0	-0.270904034862421	0.27866518417478414
301.0	0.07483560089530034	-0.4423999680713885
301.0	0.1960684339671256	0.1637347838966238
302.0	0.5785627909728629	0.06133921938467278
302.0	-1.042585965707705	0.7672904656028159
302.0	0.4640231747348565	-0.8286296849874869
303.0	-4.114222502198628	3.1370290111684636
303.0	0.03413996769304006	-4.62449168589417
303.0	4.080082534505587	1.4874626747257056
304.0	-9.93702634299485	0.4078813152657448
304.0	1.8619728430151872	-5.714876538752551
304.0	8.075053499979674	5.306995223486794
305.0	1.57692533798996	-1.2281064530067691
305.0	-1.2697914400457508	2.3855521311892107
305.0	-0.30713389794420554	-1.1574456781824414
306.0	-0.31946070651574415	-0.3101111817046033
306.0	0.1890396050020309	-0.2566921946371029
306.0	0.13042110151371314	0.5668033763417162
307.0	-0.2492384039810894	-0.9558123543506576
307.0	0.18253802024959942	-0.5555418394550553
307.0	0.1716474015930967	1.0043931441160996
307.0	-0.10494701786160221	0.5069610496896286
308.0	3.530014006158251	-0.7754516335378623
308.0	0.671433864583783	3.133273094986437
308.0	-3.220197610539845	0.3700198344868066
308.0	-0.9812502602021775	-2.727841295935428
309.0	6.299928300577207	-1.8932434767581652
309.0	6.417892157047999	1.924497962941548
309.0	-6.896308633856394	3.364484153294891
309.0	-5.821511823768813	-3.395738639478289
310.0	-8.02856159903998	-0.2594629886360731
310.0	-1.2715076112163937	-5.542134221934897
310.0	7.941720455870783	1.9595825225303094
310.0	7.885347242975151	2.0267193877894503
310.0	-6.526998488589568	1.8152953002512144
311.0	0.7987573073502895	-0.90906795234694
311.0	0.6352142457281158	0.07690759309019723
311.0	-0.4618354963232766	2.685200676297936
311.0	-0.9721360567551472	-1.8530403170412009
312.0	-1.1545269399098748	-0.053386337054201705
312.0	1.036643467723691	-0.22165511558844153
312.0	1.5350029785900947	-0.05273881354712451
312.0	-1.4171195064038842	0.3277802661897783
313.0	2.709189769465812	3.6912462244139896
313.0	-3.6436410766623055	1.181090283025573
313.0	0.9344513071964946	-4.872336507439547
314.0	-0.006499471391337441	1.3402964615964412
314.0	-0.30314967893798406	-0.15502157751839535
314.0	-0.04283206971853787	-0.5339598146593216
314.0	0.04835905482205044	-0.5523775583175298
314.0	0.3041221652258152	-0.098937511101191
315.0	1.0321015865362702	0.9830764612747415
315.0	-2.0831893684471052	0.6203675768892347
315.0	0.35838932611573754	-1.1141828953241728
315.0	0.6926984557950892	-0.48926114283982286
316.0	1.1702421882299212	0.4632660369491478
316.0	-0.5023114085692767	1.0618817648661074
316.0	-2.00868054066083	0.6227377107787742
316.0	1.3407497610001955	-2.1478855125940193
317.0	-0.3795529297268606	-1.6459543818753493
317.0	0.7394488197200059	0.29078732933319507
317.0	0.6301463836582719	0.9975413490859742
317.0	-0.9900422736514094	0.35762570345619205
318.0	-2.874295400039632	-3.2708978866121394
318.0	-0.8661441798057192	-4.8786626303255165
318.0	0.4559801012961132	-4.01773680287323
318.0	2.6245023203072457	1.1478307628949636
318.0	0.659957158242021	11.019466556915914
319.0	0.9390668459205948	-3.329662315596218
319.0	4.820547388691188	-1.435926677860975
319.0	1.1422197523972004	3.5972500750207645
319.0	-3.409358351822889	0.8676335439885141
319.0	-3.4924756351861146	0.30070537444791934
320.0	-0.4393474421400647	1.2586481373442318
320.0	-1.1546122017294416	-0.5623831740500447
320.0	1.593959643869506	-0.6962649632941871
321.0	2.6778521931489383	-1.6417626185260294
321.0	2.5524681308836334	2.136756103780441
321.0	0.9861566348306657	3.3455411481434476
321.0	-3.5745924546173393	-0.48681214618712104
321.0	-2.641884504245874	-3.353722487210747
322.0	0.23362540142047322	0.9733906988997395
322.0	-0.6898862790967081	0.5291299609061748
322.0	0.45626087767624873	-1.502520659805917
323.0	-2.3591667258949354	0.032811407939839166
323.0	-0.018805071227924408	-1.7343391897713496
323.0	0.12699187785676758	-1.7260484890788077
323.0	3.5390398453632583	1.594467711655775
323.0	-1.2880599260971601	1.833108559254542
324.0	0.5069293971505379	-0.11514380890565419
324.0	-0.09082614564999517	0.594662920330412
324.0	-0.4161032515005364	-0.47951911142476095
325.0	-1.3738892023171916	-2.241731224956908
325.0	2.545912804195583	0.40038235941259337
325.0	1.4445441005130082	2.1455455158933936
325.0	-2.6165677023913956	-0.3041966503490655
326.0	-1.646332108739744	5.497177681377339
326.0	-1.1456913877003294	-7.053752337412563
326.0	1.5211396357630493	-3.892524329423757
326.0	1.2708838606770279	5.449098985458998
327.0	-1.5345983895770292	3.1364473146082505
327.0	-1.7399723207337563	-3.166381495638305
327.0	3.274570710310778	0.029934181030048523
328.0	-0.5543833529869404	-3.1099870900282647
328.0	3.1505152977970234	-3.263634636697417
328.0	5.6427635116328245	0.9836928636285163
328.0	-3.3372523516293495	5.262373444847933
328.0	-4.901643104813557	0.1275554182492522
329.0	0.8527576611073517	1.1391117153888308
329.0	-1.5496750774111079	2.641408391307946
329.0	-1.1052517192024578	-2.120198868239979
329.0	1.8021691355062086	-1.6603212384568327
330.0	0.9634588822440738	-0.5177021035625399
330.0	-0.31304310560662274	1.245284877341562
330.0	-0.6504157766374614	-0.7275827737790409
331.0	0.1838580932509717	-1.9781958110893783
331.0	1.2226567896289438	1.9569874009836852
331.0	-1.4065148828799128	0.021208410105696296
332.0	-1.739572646685457	-0.2537046546850592
332.0	-1.4600071593722288	-3.0170455942382666
332.0	1.6562866277043637	1.0831263651920953
332.0	1.5432931783533168	2.1876238837312347
333.0	0.20554382288311343	0.10654622944839401
333.0	-0.09800207597100476	0.10369342649465146
333.0	-0.10754174691212866	-0.21023965594304347
334.0	1.6787579666672336	1.148813472791224
334.0	-3.541963263150899	1.7568550700966918
334.0	-0.6790005342851821	-2.7063190667729526
334.0	2.5422058307688533	-0.19934947611496817
335.0	2.288279540694916	-1.0939642723868754
335.0	1.6666946078948	2.0639087268197303
335.0	-2.2811791036641527	1.0656321185791389
335.0	-1.6737950449255559	-2.0355765730120075
336.0	1.6658705447008704	3.427381156984908
336.0	-0.7191784684667262	1.4813866995632787
336.0	-0.8814479541364655	-1.5046376247757247
336.0	-0.06524412209769115	-3.4041302317724362
337.0	3.1361773051443613	-3.155121919569256
337.0	1.0431953664529423	1.3311553177019966
337.0	-1.7834504914655658	1.2044694586975728
337.0	-2.3959221801317394	0.619497143169694
338.0	1.238988152607398	-4.21101682352871
338.0	8.436409045574297	4.129925547051224
338.0	8.421767537339676	4.2069154709257885
338.0	-9.307797448474936	-0.5061742170018242
338.0	-8.789367287046417	-3.619649977446482
339.0	0.045441268161560466	-1.6716911384931459
339.0	0.5729374005620405	2.573452278577808
339.0	-0.6183786687235893	-0.9017611400846538
340.0	-2.105794575995654	1.4441280137550851
340.0	-1.2580926010679698	-0.9363620992401827
340.0	3.3638871770635967	-0.5077659145148932
341.0	2.572960957396541	-1.4429244010834648
341.0	-1.4146160767975666	1.1423122548317055
341.0	-1.1583448805989731	0.3006121462517522
342.0	0.18796962068052817	-0.2774281229553201
342.0	0.11148922886228751	0.12219865359023034
342.0	-0.2994588495428129	0.15522946936510543
343.0	-1.2266596454453624	-0.8640614309553278
343.0	1.217886191502783	-0.7176568389405602
343.0	0.008773453942589438	1.5817182698958985
344.0	-1.7310156282535891	4.534401645352236
344.0	-0.3476310274287402	-2.6457508113514248
344.0	0.6494482512513999	-3.1711330519182193
344.0	1.532346942961878	-2.677099103546909
344.0	-0.1031485385309785	3.9595813214643476
345.0	-2.5677131872727283	-3.331734030191286
345.0	-2.560910956517473	-5.6106824116854845
345.0	4.8829568850222955	2.960882826881748
345.0	2.0680113035290226	4.017563431971116
345.0	-1.8223440447611137	1.9639701830239418
346.0	0.38808883507139036	-4.239233891322982
346.0	4.3247781157128165	6.705378413652766
346.0	-3.0691721728493024	1.2125080718916887
346.0	-1.6436947779349034	-3.6786525942214867
347.0	1.9675792168537178	1.2054267603440036
347.0	-0.694280902942475	2.4334025314632375
347.0	-2.0348465000438027	0.9465661148845445
347.0	-1.8734814388276702	-1.4988753245768964
347.0	0.36133439666394723	-2.5261746617457432
347.0	2.273695228296334	-0.5603454203691408
348.0	-5.8961566690025125	1.9785512405351917
348.0	-0.4505568225823131	-8.295073782087915
348.0	11.748229172147333	-0.590587382987823
348.0	-5.40151568056251	6.907109924540551
349.0	-0.30317596473172725	1.0554558141287769
349.0	-0.43795726224924164	0.055086803777209065
349.0	0.7411332269809635	-1.1105426179059856
350.0	-0.7921250372385151	2.8419478374512948
350.0	-2.0106238734032957	3.264162486877236
350.0	-2.2052187889017265	-0.9704468043513761
350.0	2.4632046724954852	-2.5852184459569454
350.0	2.5447630270480364	-2.5504450740202174
351.0	1.5193054934326178	0.12925943083006008
351.0	-1.0853576369397016	0.3489722485239361
351.0	-0.4339478564929202	-0.478231679353999
352.0	-0.6992247451866357	-1.1277781807386162
352.0	1.7862202451521558	-1.510239581849655
352.0	-0.16197369783999105	3.250500383633322
352.0	-0.925021802125535	-0.6124826210450641
353.0	-2.885047014920572	0.9685955029695588
353.0	0.7994691039597307	-1.7002291117250565
353.0	1.2674212250023904	-0.4373543239108841
353.0	0.8181566859584437	1.1689879326663846
354.0	-1.716755489814757	-1.3918326588790302
354.0	3.253843748563518	-0.2275710836119389
354.0	2.3656368952077487	0.11253700424914359
354.0	-3.902725153956527	1.5068667382418484
355.0	1.1607932248067372	-9.370483876414749
355.0	2.8858103925312717	8.817661567333058
355.0	-1.6328992911918947	9.441019277150824
355.0	-2.413704326146101	-8.888196968069106
356.0	0.10566145198525645	-0.31698638540866153
356.0	0.13032808988367772	0.20435215247128843
356.0	-0.23598954186894577	0.11263423293738128
357.0	-0.023018284605353382	0.0397431462294536
357.0	-0.029878119905310658	-0.02836747474751647
357.0	0.05289640451067403	-0.011375671481936075
358.0	1.331513205524594	-1.8094354043910732
358.0	4.591156540789658	2.962465464392597
358.0	-3.938747127745976	1.301645454126456
358.0	-1.983922618568281	-2.454675514127985
359.0	0.43268622472957563	-0.01379982463085297
359.0	-0.11849776350987758	0.2851062547656471
359.0	-0.31418846121971106	-0.27130643013480327
360.0	-0.5167935921804471	-0.1514620791590742
360.0	0.3319281262111001	-0.4724404010017763
360.0	0.18486546596934988	0.6239024801608362
361.0	0.204987009573065	-0.24722746549362032
361.0	-0.06478303049374777	0.22908184211626179
361.0	-0.14020397907932583	0.01814562337737669
362.0	2.1833040656949105	-5.02571144340029
362.0	6.014907141650442	-3.5013899338348162
362.0	-0.7805499145713584	5.986920521308031
362.0	-7.4176612927739995	2.540180855927089
363.0	-5.256011557251555	-1.88976624456067
363.0	5.790431671995119	-1.4394578889690812
363.0	4.557582887752265	4.1488861125990875
363.0	-5.09200300249585	-0.8196619790693414
364.0	2.0777649996903493	-7.317838301653039
364.0	3.5994835470028077	-2.756357776684763
364.0	-1.3684574689776068	9.940314367298429
364.0	-1.6360361297173065	9.732305313497008
364.0	-3.707556789064185	-1.8334987430134844
364.0	1.0348018410659328	-7.764924859444122
365.0	-0.09878637075242352	-0.908987122602269
365.0	0.40104379784415156	1.2347416114154988
365.0	-0.3022574270917281	-0.3257544888132296
366.0	3.2597800171950335	7.393597642040199
366.0	-8.6635508311243	-1.0649405652487136
366.0	1.6616116969074994	-12.7114747056949
366.0	3.7421591170217496	6.38281762890342
367.0	-6.918660149951915	-0.6127100077066654
367.0	-1.4798777388304067	-6.62743309264606
367.0	7.673838045924156	0.9426559608285281
367.0	0.7246998428581652	6.297487139524198
368.0	7.393584565369134	2.245530001729561
368.0	7.954528200811115	3.6427463577566233
368.0	-7.523690872615537	-2.750678060239321
368.0	-7.824421893564716	-3.1375982992468763
369.0	0.14399784028851165	0.29665025392777633
369.0	-0.19023581429548408	-0.040064843612221235
369.0	0.046237974006980695	-0.2565854103155434
370.0	2.1966469090081344	-1.9704305699503992
370.0	0.3469889228704075	3.464038991944998
370.0	-3.4760874070162338	2.276223338332002
370.0	0.9324515751376898	-3.7698317603266327
371.0	-1.9357585317363735	-3.4283932474418943
371.0	1.7399421495208391	1.6724944353639306
371.0	0.19581638221555042	1.7558988120779782
372.0	2.7479118828252074	-1.4240092826450956
372.0	1.5441925899021764	0.8964235282463313
372.0	-3.163957350530518	2.2302347339239903
372.0	-1.1281471221968602	-1.702648979525232
373.0	-0.36254376963689383	0.988139769328369
373.0	-0.4789249830214405	-0.03579064030690454
373.0	0.29232056932472117	-0.36799418264767025
373.0	0.2944324512847044	-0.36265683544535815
373.0	0.25471573204888887	-0.22169811092840347
374.0	3.676217971796663	1.7655470663363395
374.0	-3.67604065416705	3.10525977887528
374.0	-0.6518271348576978	-2.30074001709547
374.0	0.6516498172280899	-2.5700668281161536
375.0	6.1167352834798	2.3077975354465567
375.0	-7.078414694150361	10.43580616943472
375.0	-8.27232212821407	0.834926733065672
375.0	9.234001538884652	-13.578530437946966
376.0	-0.04935466095950766	-0.5559983447916419
376.0	0.5317629848874696	0.4662318477876157
376.0	-0.4824083239279623	0.08976649700403327
377.0	2.400956515869987	-0.40121081614312404
377.0	-1.9424205639563696	1.4920071475924659
377.0	-0.4585359519135998	-1.090796331449333
378.0	2.4032017273440864	-0.5197155811630848
378.0	2.552156525341678	1.6801183148959113
378.0	-2.5756378387876087	0.11854478305713934
378.0	-2.3797204138981565	-1.278947516789956
379.0	-0.8433217257465072	0.21433601276789785
379.0	1.306263620021059	-0.5765583169103008
379.0	-0.46294189427454846	0.36222230414240125
380.0	2.620154256881662	12.088215910299532
380.0	-3.0824301693946254	-5.055755181041642
380.0	-3.109215747265184	-6.16913178634579
380.0	3.5714916597781383	-0.8633289429121191
381.0	0.7699163692083126	0.2226905987232235
381.0	-0.7560292809303663	0.9264947774702139
381.0	-0.013887088277943715	-1.1491853761934399
382.0	-2.2391983376515188	1.966149516382848
382.0	-2.4966822014021477	-1.5134383982802777
382.0	2.2223939512124846	-1.9937656877541396
382.0	2.5134865878411716	1.5410545696515707
383.0	6.315631708833489	-0.5470777337255393
383.0	-2.5263959057801477	2.156207351476663
383.0	-3.7892358030532955	-1.6091296177511194
384.0	-1.3088981869183516	-4.072733640859956
384.0	3.591204440524372	3.961692301608565
384.0	-0.2029880372867236	3.6759886536223543
384.0	-2.0793182163192876	-3.564947314370933
385.0	3.5034448715821993	-1.1278319982824963
385.0	-0.10163954289436228	1.7160456567138294
385.0	-3.5474908847866233	1.7262508071754157
385.0	-1.9506425035384298	-0.22428910524862555
385.0	2.0963280596372247	-2.0901753603581343
386.0	1.3560371365002086	1.7379856854433273
386.0	-1.6429805968826934	-0.2777151796322469
386.0	0.2869434603824747	-1.4602705058111218
387.0	-0.8727176427230465	2.5439444728256917
387.0	-0.5388630814335656	-1.2713780381461568
387.0	1.411580724156615	-1.2725664346795635
388.0	2.380256534532347	-3.697023025127335
388.0	-0.345879629739277	1.9702638968062414
388.0	-2.0343769047930635	1.7267591283210668
389.0	0.3421016425736936	0.6384025721758875
389.0	-0.17444240187095839	-0.16186211793090233
389.0	-0.16765924070272234	-0.4765404542449791
390.0	5.688663245519512	3.2639229807395087
390.0	4.106364570976389	6.730846836292233
390.0	-8.141571722566894	-5.786978225589928
390.0	-1.6534560939290082	-4.2077915914418185
391.0	-2.7405345715994343	-1.9315413922871154
391.0	2.643955561860637	0.2558712086368023
391.0	2.0859029484692733	1.3565509105663391
391.0	-1.9893239387304722	0.3191192730839749
392.0	1.6783212895793351	0.676993876113928
392.0	-2.7455353439360457	2.1819534443481543
392.0	-0.9484177036536918	-2.600297474662506
392.0	2.0156317580103704	-0.2586498457995754
393.0	0.5156299366184169	3.739626279626855
393.0	-0.46649298026706154	1.595069110186229
393.0	-1.0906780907885527	-2.5110597164217356
393.0	1.0415411344372114	-2.8236356733913324
394.0	0.509762339305196	-0.2038976887368337
394.0	-1.2925147738698717	0.9007375314972692
394.0	0.7827524345646797	-0.6968398427604447
395.0	-0.15624225197842545	-0.17626900002379242
395.0	0.00884020659006493	-0.28243326325506324
395.0	0.14740204538835608	0.45870226327884983
396.0	-2.196598483695503	0.47490009336815975
396.0	1.203680409547337	-1.6801445907323864
396.0	0.9929180741481873	1.2052444973642469
397.0	-1.666311767860455	0.7630938358621173
397.0	0.21685499709989928	-1.4416847267813875
397.0	1.4494567707605543	0.6785908909192551
398.0	1.4450956621890851	0.02913173651008888
398.0	0.006557194574425523	0.7503494012336877
398.0	-1.4516528567635032	-0.7794811377437759
399.0	1.1099137161169295	2.429056658971176
399.0	-4.6797880296151	0.9791058598815894
399.0	3.569874313498171	-3.4081625188527673
400.0	-1.373933980109745	-0.7168048616410873
400.0	2.116935448522777	-1.567787594436442
400.0	-0.7430014684130446	2.284592456077539
401.0	-2.0661564337096587	1.4930157093969485
401.0	1.0929520171001275	-1.831112952651744
401.0	2.6089799596250733	-1.093040070258785
401.0	-1.6357755430155279	1.4311373135135559
402.0	-0.19631082133984634	-0.1482572051409655
402.0	0.3344253897683855	0.013107372535153178
402.0	0.4022789996391392	0.06746334693023015
402.0	-0.5403935680676784	0.06768648567558219
403.0	1.9096615640637205	2.1411463446380434
403.0	-2.6408155429143716	-1.114253086321698
403.0	0.7311539788506644	-1.0268932583163366
404.0	-0.08898687840744526	0.5577419059056976
404.0	-0.4542843028884589	-0.04311066146186576
404.0	0.5432711812959042	-0.5146312444438319
405.0	0.01200545224728105	-0.0029656930370375277
405.0	0.01608565453903836	0.005755755568066582
405.0	-0.0030872076668352344	0.041683270804918376
405.0	-0.02500389911948174	-0.04447333333595718
406.0	2.3865952401073116	-13.180464294964771
406.0	6.488123474501409	-10.417731654041816
406.0	3.479857282366233	8.584218661292415
406.0	-5.209461571348357	17.51630495405655
406.0	-7.145114425626625	-2.5023276663423477
407.0	0.06297804204435205	0.0053043807456011685
407.0	-0.06864714815547955	0.03560138726372597
407.0	0.005669106111139658	-0.04090576800934315
408.0	-3.856895375795788	-1.4905980640538863
408.0	4.5293489421431605	-1.7509028174844183
408.0	-0.6724535663473725	3.241500881538305
409.0	-2.442191152250595	0.10162063319390102
409.0	2.374651410442025	-1.6655676145980838
409.0	0.06753974180855954	1.563946981404171
410.0	2.703860779272186	-2.6506054964101398
410.0	0.8594807424650722	3.2985049681773857
410.0	-1.6419823761073955	2.9892848524342144
410.0	-1.9213591456298524	-3.637184324201458
411.0	-0.17806049117605327	0.4206951068336654
411.0	-0.25811249713351403	0.036284751658065384
411.0	0.4361729883095597	-0.45697985849173905
412.0	-1.7168627308193556	-2.6231994414302897
412.0	4.847152506627642	-0.48050438603392176
412.0	1.2828094921833877	2.9358874876672445
412.0	-4.413099267991682	0.16781633979696475
413.0	0.244474963352584	-0.5223476569703701
413.0	0.22792695597349494	0.18857755509716378
413.0	-0.47240191932607234	0.3337701018732019
414.0	-6.2929448340695915	0.5680865245092881
414.0	-5.197011732719057	-3.3518023370959966
414.0	5.914705480761899	-0.6603223024019389
414.0	5.575251086026748	3.444038114988647
415.0	-1.9851618698753306	3.1758406672456774
415.0	-2.0952201081567208	3.170558370731179
415.0	-4.354036434225792	-4.161095367897082
415.0	8.434418412257822	-2.1853036700797746
416.0	-1.3694021505703131	0.3645515852601144
416.0	-0.514715620510428	-0.6599538558284188
416.0	0.8348194560375841	-0.2609432237201887
416.0	1.0492983150431359	0.5563454942884727
417.0	-2.260850928904508	-0.6819184954499571
417.0	-2.06598665528937	-1.0150432493093957
417.0	5.07150798738195	0.12716668276040854
417.0	-0.7446704031880755	1.5697950619989378
418.0	-3.727067006513024	2.4884591060387504
418.0	-1.1163947348053145	-0.8576015443241345
418.0	4.8434617413183485	-1.6308575617146261
419.0	-0.1555431701150471	-0.11003552066857614
419.0	0.37137209743254873	-0.39819663341329703
419.0	-0.029876341300884443	0.29490945874461794
419.0	-0.1859525860166264	0.21332269533725928
420.0	6.7690158531845235	-5.561595886991887
420.0	7.754976931297385	-2.363058237632498
420.0	-6.037754830958148	3.806298312315114
420.0	-8.486237953523728	4.118355812309303
421.0	-0.03264322861858885	-0.0911250138760328
421.0	0.02280883047568546	0.004619786885322852
421.0	0.009834398142853085	0.08650522699068348
422.0	0.02887535271739563	-0.05634125336727045
422.0	0.020847275061244327	0.10582182185568156
422.0	-0.0497226277786464	-0.04948056848843151
423.0	-0.17913694623696375	-0.7533434039602993
423.0	0.9352962930278049	0.39679339289553506
423.0	-0.7561593467908487	0.3565500110647578
424.0	2.799378202723462	2.2787579700684977
424.0	1.369129181710004	3.953092977871431
424.0	-1.3530742556502364	2.099390691687512
424.0	-3.285335813538727	-2.797975961729726
424.0	0.46990268475548214	-5.533265677897698
425.0	2.8894589153315784	-0.7990708025595142
425.0	1.6181119230478098	1.4977296260672044
425.0	-1.16321040660651	3.734068211400027
425.0	-4.875513807816939	0.577405517903264
425.0	1.5311533760440668	-5.010132552810987
426.0	-0.09911146842649426	0.09984483937157516
426.0	0.03689993115928401	-0.2563970882466714
426.0	0.06221153726719711	0.15655224887508984
427.0	1.2998475210602112	-0.2177367388695048
427.0	-0.2110758988004529	0.9924906339662803
427.0	-1.0887716222597648	-0.7747538950967784
428.0	-2.118919711205237	-1.2290292926774642
428.0	1.720002943042587	-1.4068236720359295
428.0	0.6887115387370766	1.461590372146518
428.0	-0.2897947705744285	1.1742625925668901
429.0	4.086188890116556	-6.053685485307681
429.0	1.2147991397412197	0.0670240587801453
429.0	0.5363537459783545	1.0931147634358929
429.0	-5.8373417758361175	4.893546663091627
430.0	0.8332750610757783	-0.7713480364968865
430.0	0.9736350751067797	-0.6409079341046953
430.0	0.5070447400050582	0.40531346057357437
430.0	-0.8924814196953783	0.827413988541611
430.0	-1.4214734564922458	0.17952852148639026
431.0	0.24344457400829883	-1.0465747415421693
431.0	5.587249413518753	-0.779346095587826
431.0	-5.830693987527066	1.8259208371300013
432.0	-0.5174675262282622	2.112801764345696
432.0	-1.0106069532935154	-1.2773950295228402
432.0	1.5280744795217829	-0.8354067348228603
433.0	1.3884071873518127	-0.3413258817807094
433.0	0.018754325361951873	1.4739054794557984
433.0	-1.4071615127137505	-1.1325795976750817
434.0	0.22845442777094013	-0.05248445977676161
434.0	-0.005944263110824036	0.24365018386565832
434.0	-0.22251016466011608	-0.19116572408889673
435.0	3.572794840921244	-1.5196873536373614
435.0	3.262389774860475	-0.971010920331261
435.0	-2.900762121473717	2.4303993066227187
435.0	-2.3869382901418077	0.7940826310645752
435.0	-1.547484204166219	-0.7337836637186553
436.0	0.4717438175040823	-0.3161085216470989
436.0	0.1852411085367241	0.6505082719837054
436.0	-0.6569849260408188	-0.33439975033663577
437.0	-0.22693518252658396	0.30066008067368877
437.0	0.052321547351713946	-0.28094081610427085
437.0	0.17461363517486192	-0.01971926456940564
438.0	0.0038519178410425137	-0.0005833645035433938
438.0	-0.0012587305378901177	0.00090623280485406
438.0	-0.0025931873031583698	-0.000322868301302586
439.0	1.5667761328542757	-2.647004340749572
439.0	1.6981688300216136	1.3174701190923217
439.0	-1.6077198935302925	1.8531235979329659
439.0	-1.6572250693455892	-0.5235893762756809
440.0	0.2632271547128363	-0.3913662367145234
440.0	-0.22046434348339752	0.6926776532704894
440.0	-0.04276281122942607	-0.3013114165559723
441.0	0.8708409260510139	-0.6596930205687527
441.0	-0.4886609118352402	1.0482336611377943
441.0	-0.3821800142157825	-0.3885406405690476
442.0	1.279102471920018	-0.05002395050889302
442.0	0.21925033392399457	0.5149353247194914
442.0	-1.498352805844026	-0.4649113742105725
