# Supplementary material
Source: ML conference proceedings conference paper supplement (https://openaccess.thecvf.com/content/CVPR2021/html/Harel_Crossing_Cuts_Polygonal_CVPR_2021_paper.html)
Supplement: Supplementary file 2 [file Harel_Crossing_Cuts_Polygonal_CVPR_2021_supplemental.zip › Dataset/D4/p4/pieces.csv]

piece	x	y
0.0	2.130697691614176	-1.6969347283115521
0.0	0.15501705902231613	2.499770487476478
0.0	-2.2857147506365	-0.802835759164947
1.0	0.18202194501714491	0.35716172176371136
1.0	-0.5599924093636932	-0.512643533225273
1.0	0.37797046434654646	0.15548181146158283
2.0	-9.987107582026958	1.1307941670418458
2.0	-7.291509975659579	-7.762629732888053
2.0	11.366996188305887	0.23251563091905128
2.0	13.81892112734472	3.4970319437402173
2.0	-7.907299757964056	2.9022879911868955
3.0	2.873021659646993	2.2509963281573544
3.0	-2.3653770398702973	-0.15352543166177454
3.0	-3.968205704615422	-2.718797525532157
3.0	3.460561084838719	0.6213266290365782
4.0	-2.408806812650345	-1.992350699084888
4.0	0.9098370580018194	-2.4857576066016294
4.0	2.79001010016081	1.7024643460918805
4.0	-1.2910403455122768	2.7756439595946505
5.0	-0.2552755227211146	0.027967711324472608
5.0	0.1740385987319362	-0.15610585240715552
5.0	0.0812369239891784	0.1281381410826829
6.0	0.5276546994075857	0.383025132260598
6.0	-0.5545662273234069	1.4664565678854549
6.0	0.02691152791583164	-1.8494817001460433
7.0	0.6074796541860377	0.31000658685352916
7.0	0.017622152981200196	0.46812598502799935
7.0	-0.4323833838874649	-0.07712860855376208
7.0	-0.19271842327975863	-0.7010039633277506
8.0	-8.129344671147205	2.668508763008142
8.0	-7.44359344289353	-3.5700738422579925
8.0	2.63468702767793	-3.432217770303155
8.0	5.831411846960767	-0.22839609853560006
8.0	7.106839239402041	4.562178948088622
9.0	-1.9975680054589222	10.851529785092902
9.0	-7.7608447607519775	-2.143851909819784
9.0	-6.936635731891609	-4.313132451455864
9.0	8.06659041958942	-2.515088743612051
9.0	8.628458078513093	-1.8794566802051962
10.0	-5.176243578569255	8.241207252177878
10.0	0.7146007630309068	-6.21223331384713
10.0	3.481824008691645	-5.196265057930975
10.0	0.9798188068467446	3.1672911196001974
11.0	-2.340846435904467	1.1559599575555923
11.0	0.8850546918759762	-0.6750016331474518
11.0	1.4557917440284776	-0.4809583244081456
12.0	4.875153783815203	3.260916816810791
12.0	-13.724867383952978	-1.162466762346671
12.0	2.676474020489252	-4.5138528189627145
12.0	6.173239579648543	2.415402764498571
13.0	-3.782655521380076	-2.0589374906848468
13.0	1.5227956687673716	-0.5639771909088998
13.0	1.9541194093358338	1.6615908173004874
13.0	0.30574044327689165	0.9613238642932355
14.0	-2.587268300853846	-7.829071741845305
14.0	3.1088245759339785	7.745898065712177
14.0	2.2249087742469156	7.927926925769768
14.0	-2.7464650493270413	-7.844753249636643
15.0	1.789968211161963	-5.582154200037365
15.0	9.859440745374808	-6.80345200829787
15.0	-3.978188668605473	7.499311829230798
15.0	-7.6712202879313205	4.886294379104418
16.0	-0.9741837270822471	1.587112080453099
16.0	-2.273758451168434	-0.018033795725649344
16.0	-0.9376640703718907	-0.8195662755574386
16.0	4.185606248622587	-0.7495120091700205
17.0	-1.6278032892327334	11.791319419775546
17.0	-2.32320351378138	11.800359400354909
17.0	-1.8411300776558466	-13.541750671214817
17.0	5.792136880669946	-10.049928148915633
18.0	1.1356918444756612	-0.6053952170864092
18.0	-0.30021982010610776	0.5476631783942223
18.0	-0.6470849793825887	0.47995592337444565
18.0	-0.7796094251148713	0.35672932564258114
18.0	0.5912223801278663	-0.7789532103248415
19.0	0.7694045804704001	2.167179303424013
19.0	-1.162189747610308	1.2092004033388295
19.0	-0.7762928938058082	-3.728099665332345
19.0	1.1690780609457163	0.3517199585695025
20.0	1.520632886357964	0.06822821189569146
20.0	-0.8786125238453171	1.4220425782425696
20.0	-0.6616995491067466	-0.5834069336540425
20.0	0.019679186594106373	-0.9068638564842211
21.0	-0.540101698537438	0.6892209063307665
21.0	0.38280332030604397	-1.4288129289636484
21.0	0.15729837823136586	0.7395920226328772
22.0	4.279437413720203	0.578534135486324
22.0	4.11130837784468	10.484592057188383
22.0	-8.62197517569238	3.5038589916820864
22.0	0.2312293841274996	-14.566985184356804
23.0	-0.06889124040117248	0.13561649934401449
23.0	0.03433927051360146	-0.14891998584809962
23.0	0.03455196988757107	0.013303486504095165
24.0	0.11431684080580394	-0.38662283620353843
24.0	0.7874875384982949	0.9428295224900517
24.0	0.2391211828947966	0.9792462155886933
24.0	-1.1409255621988972	-1.5354529018752066
25.0	-3.3131762129288753	6.687840062356365
25.0	-5.277454790816613	-2.4436646235590076
25.0	-2.863268091117901	-6.232472496187242
25.0	8.701887453067368	-7.284765217529489
25.0	2.752011641796011	9.273062274919397
26.0	-0.46460105430410054	0.39949718157310016
26.0	-0.3795785339121055	-0.08418414026463468
26.0	0.8441795882161983	-0.31531304130848986
27.0	-0.04734539139648312	-0.27871333621978917
27.0	0.27270793258345327	-0.17797374518150647
27.0	0.015885037989956306	0.25071327231970225
27.0	-0.24124757917693304	0.205973809081621
28.0	1.5515305230836716	0.7634232143382735
28.0	-1.4458214365582363	-0.558654647901838
28.0	-1.5259750779908416	-0.7277539313515918
28.0	1.4202659914653917	0.5229853649151964
29.0	5.35377642073057	8.077653962762218
29.0	-4.764992559335486	-3.166965101623785
29.0	-4.193638781668915	-6.29135082410066
29.0	-3.17311088471866	-6.233678920551893
29.0	6.777965804992477	7.6143408835141155
30.0	-4.66605534023939	-1.3779781575353902
30.0	-3.668043390463486	-3.031557618200708
30.0	2.2416887305792947	-0.27322638325987353
30.0	6.080567553382842	2.2230796687255134
30.0	3.2912581038749282	2.865116685404591
30.0	-3.2794156571342095	-0.40543419513409595
31.0	-0.032371521044171236	-4.940244098998343
31.0	0.7451689461211346	-3.24597594844793
31.0	2.1204691821629034	9.137249973993162
31.0	-2.8332666072398793	-0.951029926546882
32.0	-4.531112168275855	0.5924830009761582
32.0	-5.228132853261816	0.13612181965287862
32.0	4.473142900405729	-0.8103704192987639
32.0	5.2861021211319335	0.08176559866975511
33.0	5.477424661644923	-4.077849503098655
33.0	5.862270867297897	-1.9767631877912653
33.0	-3.0652532754502007	4.986308197765206
33.0	-4.563193336823594	3.813749546594587
33.0	-3.7112489166689695	-2.745445053469883
34.0	0.532889598818966	0.26834774913051673
34.0	-1.172681103402398	0.5183172807562331
34.0	-0.12572408506016947	-0.522391961393728
34.0	0.7655155896435542	-0.26427306849301735
35.0	0.3155565095696555	-0.8122501630636499
35.0	0.36923304980413735	-0.8223255867543031
35.0	-0.2692714935477103	0.7345548459525177
35.0	-0.41551806582609124	0.9000209038654172
36.0	3.2605957695232246	3.0663063105641806
36.0	-3.6308636125554674	-0.4438176475578928
36.0	0.3702678430322416	-2.6224886630062914
37.0	1.4900933499191826	0.24484783198439913
37.0	-0.3052530213863308	0.6949586872421599
37.0	-1.1848403285328677	-0.9398065192265352
38.0	0.3633393072951703	1.6964087432493546
38.0	-1.082749784433461	-0.9630227695161597
38.0	0.12279186308845569	-2.5162343951539823
38.0	0.5966186140498247	1.7828484214207947
39.0	7.8041544537457845	0.7189213503023562
39.0	-0.4057357559264786	4.304355383599196
39.0	-4.9908361469461955	0.10377158448854176
39.0	-2.407582550873124	-5.127048318390095
40.0	0.3654787667472461	1.226012474603549
40.0	-0.22671929809612254	2.472091408476988
40.0	-0.1516091459658382	-1.7762506760791559
40.0	0.01284967731468558	-1.9218532070013847
41.0	-2.0392104265137614	-5.492125666919665
41.0	0.9891383818027123	0.511166343675826
41.0	1.0265225884224907	0.8177157067086878
41.0	0.8453875529290283	1.55513235731211
41.0	-0.8218380966404499	2.6081112592230475
42.0	8.768759970543895	1.3355652106651712
42.0	6.091368417086106	3.392553514585489
42.0	-19.573207806440664	4.497781476043617
42.0	-18.096314693579824	-0.2974260435195563
42.0	11.243104690593137	-5.391409598569633
42.0	11.566289421797386	-3.537064559204963
43.0	0.010976610323444559	0.08473416402080752
43.0	-0.03656874827480601	-0.050193855010147066
43.0	0.025592137951374435	-0.03454030901066623
44.0	0.2568675269044211	-0.2099596826585877
44.0	-0.02496059633857914	0.41716352936859025
44.0	-0.28983628768215336	0.0005310861285466136
44.0	0.057929357116313515	-0.20773493283850658
45.0	-0.10460079551494773	0.26692946151688307
45.0	-0.06311251035636425	-0.14026594772374332
45.0	0.16771330587128042	-0.12666351379314325
46.0	-0.47511163346325536	1.5002792395410272
46.0	0.15347902925678325	-1.5426851798146473
46.0	0.739025725084952	-1.486856458373544
46.0	-0.4173931208784823	1.5292623986472067
47.0	-2.998287763677256	6.300944489601863
47.0	-9.178093943030342	-2.8501650315918163
47.0	3.8775231276105586	-8.67530893304278
47.0	9.055303813050102	-0.49009656481934477
47.0	-0.756445233953053	5.714626039852089
48.0	-0.8990245574548779	1.5633022708315716
48.0	-1.1379863616310775	1.470764656435456
48.0	0.459777050316915	-4.1065185114651825
48.0	1.577233868769038	1.0724515841981335
49.0	-2.7043094340815137	0.5248182882212831
49.0	2.690204800324393	-4.25661943636801
49.0	2.722377984032789	-4.188415773972065
49.0	-2.7082733502756646	7.920216922118785
50.0	8.123434383358962	-6.044133118655508
50.0	8.356999870592958	-5.733617216526813
50.0	5.62969702401268	-0.8582843977154068
50.0	-12.102572377460097	12.882385049198504
50.0	-10.007558900504488	-0.24635031630076704
51.0	1.7768154657891682	-0.7636633083478898
51.0	-0.4064089485178009	4.63806457286256
51.0	-2.227627273493264	-0.8130023948354519
51.0	0.8572207562219062	-3.061398869679205
52.0	-0.3407585574651734	-2.652319445542917
52.0	2.9901389890749357	-2.4381492728612773
52.0	2.305051808831094	1.4682459484011259
52.0	-1.7505905272130167	2.6920103787505734
52.0	-1.9534205370360347	2.1303418466379322
52.0	-1.2504211761917927	-1.2001294553854216
53.0	9.556639731724996	-4.039781187589866
53.0	2.5153098838633063	2.7237540957209974
53.0	-6.493237563083887	1.2385092105896982
53.0	-5.5787120525044465	0.0775178812791768
54.0	-0.3935099487987119	0.2164593029383582
54.0	0.09408400710996576	-0.9602365366275711
54.0	0.29942594168876047	0.7437772336892124
55.0	-0.7199617941325724	1.967073042393279
55.0	-0.9125468148617837	0.5798745367683636
55.0	1.6325086089943561	-2.546947579161643
56.0	3.5652403788133538	-1.063093130331917
56.0	-1.2492733136664202	0.6322419990112909
56.0	-1.3917019087972422	0.5845834446612306
56.0	-0.9242651563497002	-0.15373231334061696
57.0	1.850813489565995	0.05671688152106172
57.0	-0.9186396717557469	1.5833068440007323
57.0	-1.0322616350935416	-0.2097565658265767
57.0	0.1000878172833042	-1.430267159695208
58.0	-6.738181884580491	-1.2647445544368312
58.0	1.8539656029356668	-3.90185698916463
58.0	4.884216281644823	5.166601543601438
59.0	-4.293424348075805	-4.888798700028838
59.0	-1.7418777350759247	-4.383592067911434
59.0	4.91459923767396	1.8021928169413406
59.0	5.768401486725534	2.808143507318113
59.0	0.945516733542637	4.280043296399938
59.0	-0.2962434244701503	3.4386754416621192
59.0	-5.296971950320266	-3.0566642943812803
60.0	0.28755659464161765	5.242105569986228
60.0	-4.575409076058774	-3.44666794028302
60.0	-2.4397151585922088	-5.7244052747177205
60.0	6.727567640009355	3.9289676450145175
61.0	-6.332920144394659	-2.2165552497751264
61.0	8.656830853956164	-2.2799880454294965
61.0	12.752749501093641	-1.6691050828075127
61.0	-6.139966927047869	5.736907031435725
61.0	-8.936693283607301	0.42874134657641577
62.0	-3.2120239055285005	6.2035236324495395
62.0	1.2046454694326225	-6.6197449907653505
62.0	3.439179973680343	-7.111035163510231
62.0	3.2896910204091836	-6.361028594421488
62.0	-1.58788657745113	7.454254211034516
62.0	-3.133605980542477	6.434030905213002
63.0	-0.1479195813957522	0.3805802996823118
63.0	-0.09964250336042622	-0.2136079711804577
63.0	0.24756208475618222	-0.16697232850186006
64.0	0.868230285617707	1.7316922975287046
64.0	0.45093805633672507	1.701166640120365
64.0	-0.2948776760336402	1.1277842255002473
64.0	-1.2446497911049985	-1.8477283189487654
64.0	0.22035912518419357	-2.7129148442005135
65.0	1.0681554732728775	-1.3917357761921985
65.0	0.11168975510619454	1.2295982538944126
65.0	-0.8960149150775545	1.3494967992035605
65.0	-0.2838303133015401	-1.187359276905797
66.0	3.5228687171594504	-4.583220090011154
66.0	-3.1148788734186277	6.184612771719568
66.0	-3.0868080978324137	5.1752119816042415
66.0	2.678818254091599	-6.776604663312641
67.0	-0.10659814968230069	-1.0037705796375824
67.0	0.17091384210376503	0.4528608313034816
67.0	-0.06431569242147306	0.5509097483341189
68.0	-1.5248524022982781	5.5621713179516075
68.0	-3.105697502049046	-6.990490101810146
68.0	2.502593488481816	-3.730275852047074
68.0	2.7440754805969747	-1.6006215087640603
68.0	-0.6161190647314237	6.7592161446696695
69.0	1.4656507232211595	-0.4235217588780244
69.0	1.070269961782671	1.7488928469654756
69.0	-1.8363538952950642	0.2972944479573143
69.0	-0.6995667897087922	-1.622665536044766
70.0	3.6998843764647447	13.344792854975884
70.0	-12.785707619853794	4.087091974655394
70.0	-1.0436419197118116	-7.850049847881175
70.0	1.4701832531296666	-8.788596205864128
70.0	8.659281909971197	-0.7932387758859718
71.0	1.4432775232047934	-2.0242215327273554
71.0	0.7916227122432695	1.4863860016554555
71.0	-2.2349002354480736	0.5378355310719118
72.0	0.6974985025527962	0.5079773547863299
72.0	0.3492493762037446	1.2461005513191543
72.0	-1.0467478787565285	-1.7540779061055098
73.0	4.1825338322212575	9.732280276396592
73.0	-2.363468134115868	-4.8678449731499365
73.0	-1.8190656981053916	-4.86443530324666
74.0	1.8697947859010466	0.22377396837206856
74.0	1.6446847915822558	1.8563370873437188
74.0	-1.6545615519162418	-0.2601282979469069
74.0	-1.8599180255670602	-1.8199827577688803
75.0	-0.24026182299662918	0.30246535638618466
75.0	-0.6968744845892507	-0.1362596330858225
75.0	-0.18683626767687245	-0.37947708948383396
75.0	1.1239725752627812	0.21327136618345874
76.0	0.5805950142866984	1.0062189251337372
76.0	0.22457519841828805	1.390018522406012
76.0	-1.5597614576573593	0.6088857533212758
76.0	0.18691626098380362	-1.4081065213261184
76.0	0.5676749839685811	-1.5970166795349152
77.0	3.5401286247037733	3.3675359530826636
77.0	-4.677732882676403	-0.1581777302072872
77.0	-4.615366487515841	-0.5613185579190525
77.0	-4.1110610012910564	-2.04507639037778
77.0	-0.32820001460620596	-2.213129573092962
77.0	2.3703461027483823	-1.9795826599536688
77.0	7.821885658637336	3.5897489584680584
78.0	-1.0468049523386374	-0.6864096007330522
78.0	0.9533848174952998	0.06605643417980402
78.0	0.09342013484334942	0.6203531665532221
79.0	0.3970952338136153	-2.073924567391976
79.0	2.0320738232310593	-1.6152426708451524
79.0	-0.014173363404737871	2.150250549728122
79.0	-2.414995693639916	1.5389166885089915
80.0	-3.176971671876905	1.9123845338087997
80.0	-3.784430843939719	-0.3445704816340098
80.0	-0.7854678313093304	-2.7186548215949817
80.0	2.2989491870994208	-1.9880641652789446
80.0	3.9868903554797908	0.3849952570806882
80.0	3.9315390661395693	0.5652844585095812
80.0	-2.4705082615928196	2.1886252191088076
81.0	0.4504551207644113	-1.5615475050453025
81.0	-0.48514821614196096	1.9511032007477114
81.0	-0.5155490882619379	1.9371425998244773
81.0	0.550242183639471	-2.3266982955268753
82.0	2.450570087497601	-1.4152306239696177
82.0	-2.0482726773346855	4.951320610023311
82.0	-2.358416160375521	1.6924119537979814
82.0	1.9561187502126203	-5.22850193985167
83.0	-0.04262299568708237	-0.7576289898079337
83.0	0.5757283737433879	0.7700834477116131
83.0	0.16299084183741447	0.780201948103785
83.0	-0.696096219893706	-0.7926564060074626
84.0	-5.780566549564246	-0.43007435530075
84.0	2.9002081484633675	-1.3389552990588682
84.0	2.880358401100847	1.769029654359594
85.0	0.6680656741903745	-4.708739507610658
85.0	2.561892465353837	1.331066887675352
85.0	-3.229958139544222	3.3776726199353084
86.0	0.10144807826350086	3.661321048407533
86.0	-1.9952310209259478	-3.178722816032909
86.0	-0.7640276510165988	-2.5850091590745814
86.0	2.657810593679036	2.1024109266999593
87.0	0.7914996024834229	0.771653991277732
87.0	0.6115150736070406	0.828592740295955
87.0	-1.167809442835286	-0.5842402091924918
87.0	-0.23520523325519682	-1.0160065223811863
88.0	-3.491386195961779	2.4654356456286335
88.0	-6.5860816383669825	-0.6275997142585487
88.0	-4.421920846443663	-5.44777191310074
88.0	6.503295624805525	-0.19220099233453192
88.0	7.996093055966879	3.8021369740651934
89.0	-0.29479056484413896	1.2086676878438367
89.0	-1.1599295466640707	-2.825614644405685
89.0	1.4547201115082096	1.6169469565618484
90.0	-0.3795749066212741	-0.3372736880877642
90.0	-0.0911045330073237	-1.033541056279183
90.0	0.41135943324468555	0.45955107896370123
90.0	0.059320006383922666	0.9112636654032338
91.0	0.6859748837108665	0.3230169944421387
91.0	0.07017718021990257	1.0164894419753336
91.0	-0.7561520639307588	-1.339506436417482
92.0	-0.4093171347543329	-10.6953943375671
92.0	6.0914003294812655	-12.480463701375937
92.0	0.6597048593450312	7.822722719229233
92.0	0.34813568678370366	8.21669176079925
92.0	-1.8127677106887763	10.035354876943979
92.0	-4.877156030166864	-2.898911318029445
93.0	-0.0004898228140461697	8.05285881008418
93.0	-1.1856312960022086	6.965933141372989
93.0	-1.7831703633016684	5.2473165717108134
93.0	-2.203399054064193	2.338143430777914
93.0	2.222958216051741	-15.54318680955902
93.0	2.9497323201304173	-7.0610651443868955
94.0	2.5353907025927525	-5.011391026022486
94.0	4.244313017182357	-3.9429389537098976
94.0	5.478760927518205	-1.4898254256862489
94.0	-5.193326961624575	5.415291733810163
94.0	-7.065137685668773	5.028863671608443
95.0	-1.186253006805804	-3.313812546223193
95.0	0.039965662706525136	-2.1522777002975007
95.0	1.1462873440992878	5.4660902465206895
96.0	0.5055411641843925	-1.7395330443439687
96.0	1.5903881991632491	0.9185391999329787
96.0	0.7076791743051474	1.6395033644393955
96.0	-1.5077050823883404	0.22522138352682694
96.0	-1.2959034552644497	-1.0437309035552185
97.0	-0.3214366867637058	-2.7362697051316434
97.0	0.6429460014732784	0.03502014578240043
97.0	0.12726936259390512	1.6826252368199306
97.0	-0.4487786773034887	1.0186243225293423
98.0	1.36997031222435	5.019451585766054
98.0	-1.588197706596855	0.00047101099962722394
98.0	-1.4795317534361982	-4.324011829822723
98.0	1.6977591478087088	-0.6959107669429399
99.0	-0.7029497358381518	-1.3080851228106478
99.0	-0.5264323933133936	-1.255707057732901
99.0	3.977233257901694	2.7101380678002673
99.0	-2.747851128750147	-0.14634588725673298
100.0	0.6319341548201917	-1.3998015092289866
100.0	2.6780324412731242	-1.016733325142887
100.0	-3.3099665960932954	2.416534834371879
101.0	0.9903682370767519	-1.5725898577750417
101.0	3.2227219956958333	1.9201512772975824
101.0	2.655885761599861	5.239359671387478
101.0	-5.77283740741972	-1.434771682117022
101.0	-1.096138586952721	-4.1521494087929955
102.0	-0.7098495360627733	-0.40890721483352876
102.0	-0.6416745717201325	-0.4534427008689574
102.0	1.3515241077829063	0.8623499157024859
103.0	-4.327626011501984	-1.889341749148821
103.0	-1.584435503171657	-3.8202861070840552
103.0	3.0456871045025196	1.7286404719491182
103.0	2.8663744101711037	3.980987384283784
104.0	-0.413230355915434	-2.1610737607081507
104.0	-0.3488304031811431	-2.1404515715988444
104.0	0.8697318607415152	1.5270740820908615
104.0	0.5850182659002501	3.2214076223866854
104.0	-0.69268936754515	-0.4469563721705708
105.0	1.8146836483810058	-0.3368482436385157
105.0	1.241958103865134	2.892800775517774
105.0	-5.11425971339116	1.4944907017816778
105.0	2.057617961145007	-4.050443233660928
106.0	3.916269415541204	-7.066692117912455
106.0	6.503637917863193	-5.52003971336135
106.0	7.480535338248918	-3.668848111961106
106.0	-9.890505331324412	15.255154598184463
106.0	-8.009937340328895	1.0004253450504623
107.0	1.4094784164555785	-6.4213196521357805
107.0	3.6777683798341605	-5.749456227693808
107.0	5.11724856085463	8.697132360507295
107.0	-0.39606909187964606	9.243554894048374
107.0	-9.808426265264766	-5.769911374726062
108.0	14.21942014864993	6.418958780928196
108.0	-5.768008310854575	-0.6227219042569108
108.0	-6.313833838519919	-1.9866169123505184
108.0	-2.137577999275437	-3.8096199643207695
109.0	-4.55557429547096	0.10978949558681825
109.0	4.979547950692102	-2.2515338362275776
109.0	-0.42397365522114944	2.141744340640762
110.0	-4.127569096598704	4.434701384635246
110.0	-5.132431642254707	0.7115898110041713
110.0	1.2204480393731372	-4.1807084673197465
110.0	5.813758806970825	-3.9750974447015084
110.0	2.2257938925094396	3.0095147163818736
111.0	2.13529667391496	2.1955485118714764
111.0	-4.748898983348238	-1.8982958584076421
111.0	-4.943191667984988	-3.8912048068053293
111.0	3.4113188088976325	1.1633757907221605
111.0	4.145475168520669	2.4305763626193766
112.0	6.544784813028422	-0.5044344195578013
112.0	7.5935983691683155	2.095402500393674
112.0	-7.012962293425716	1.372839978159599
112.0	-7.125420888771015	-2.963808058995471
113.0	0.3096209955569392	-9.400469287719513
113.0	1.6913304461453456	-8.336403894944949
113.0	6.166089896684081	0.413593934689696
113.0	4.413225535993025	7.981756750938232
113.0	-12.580266874379403	9.341522497036538
114.0	1.97646507275752	1.0320693513699308
114.0	-2.224452250047813	1.5533434960104695
114.0	-1.2815644982064278	-1.072884533524
114.0	1.5295516754967144	-1.51252831385638
115.0	0.04900755514249748	-0.17779628196339367
115.0	0.39887726459321565	-0.26797083825028056
115.0	-0.22160587171727097	0.23603220524459378
115.0	-0.22627894801844337	0.20973491496907343
116.0	-0.962411365065009	-5.12272350803531
116.0	1.724953201256971	5.402897989957725
116.0	1.6941681239357735	5.527960141007174
116.0	0.742290608892941	5.150088867482067
116.0	-2.219714817884576	-5.804727170335341
116.0	-0.9792857511360438	-5.153496320076324
117.0	0.941638060003875	-8.051324742443004
117.0	3.3483832431910323	-7.4885467807436115
117.0	2.303006939594502	1.1825695480912093
117.0	-1.1714936506750295	7.971697619633823
117.0	-2.744773377180744	9.314345301785453
117.0	-2.676761214933582	-2.9287409463238387
118.0	0.5487233769504017	-1.3895760787139841
118.0	0.11708769181029782	0.7565682329038372
118.0	-0.6658110687607298	0.6330078458101565
119.0	-3.5036818856095855	-0.39973277048962796
119.0	-2.9891755378227938	-1.769906813262251
119.0	2.008958116671586	-0.005509134290355063
119.0	2.978693939188682	1.0581271659016835
119.0	1.5052053675721355	1.1170215521404991
120.0	0.4797245400213082	-3.4563244778309703
120.0	0.7772447575923863	2.1135920702362574
120.0	-1.256969297613709	1.3427324075947156
121.0	3.0927144594003337	-1.8181583992520725
121.0	1.8944896255709212	0.22671737373529413
121.0	0.19091153727758886	3.0300100097021248
121.0	-4.681700179965298	2.9487060905948774
121.0	-0.4964154422835641	-4.387275074780249
122.0	-2.9164448338458944	0.5501845493961806
122.0	1.7524595852215354	-1.5419671291380108
122.0	4.035360688776887	-1.3103810408512477
122.0	0.20573620602200618	1.0920685354053965
122.0	-3.077111646174572	1.210095085187605
123.0	0.8664883447895662	2.433804201603508
123.0	-1.0043999459477717	-2.1566267030644917
123.0	-0.7665600964882598	-2.2678932386889854
123.0	0.9044716976464394	1.9907157401499813
124.0	-0.10093850342640648	-2.098089297836333
124.0	0.5753300430125232	1.039603010984542
124.0	-0.08675669393162391	1.2737670529857035
124.0	-0.3876348456544692	-0.21528076613393343
125.0	-0.6632211784346697	-4.541383404174875
125.0	1.9639071950708626	-2.1086887648731842
125.0	2.2962180450791383	5.3274257606356175
125.0	-2.0912663207415645	5.149704850974207
125.0	-1.505637740973787	-3.8270584425617673
126.0	-0.8482552970727074	-1.3338913412234394
126.0	0.7034496976833738	-0.3481593875383738
126.0	0.568255565771608	1.7250658204404539
126.0	-0.4234499663822714	-0.04301509167863873
127.0	0.46363239734678374	3.274970932611184
127.0	-0.8146254019510638	-2.1397500935173484
127.0	-0.3846648317122347	-1.8100620723804215
127.0	0.7356578363165258	0.6748412332865766
128.0	0.2824161587485634	-2.086214619522695
128.0	2.1634717634480665	-2.4346984274449235
128.0	-0.6089901827423154	1.5157219514532165
128.0	-0.7044824144988892	1.5372608658233684
128.0	-1.1324153249554323	1.467930229691061
129.0	0.6129734179214039	1.6477415585478536
129.0	-0.10683061151167292	2.015330923612353
129.0	-0.432259353333374	-1.8219486703425265
129.0	-0.07388345307635887	-1.8411238118177002
130.0	-1.0328359401082414	0.8403066226684566
130.0	-1.1287029629623877	0.34797029213864705
130.0	2.161538903070636	-1.1882769148070913
131.0	0.4778257529296106	0.9345809758093091
131.0	0.4215542274491625	1.1198774036559704
131.0	-0.6477059151487162	-1.3599433480488263
131.0	-0.2516740652300442	-0.6945150314164594
132.0	6.238498268149274	0.36684220919496263
132.0	-3.631787933148211	2.425145810488221
132.0	-8.331531553007617	-0.754228431364517
132.0	5.72482121800655	-2.037759588318695
133.0	1.0757366882518526	-0.37955686342613654
133.0	-0.30338813876719406	1.4261285919152087
133.0	-0.6506938613075995	1.506360411717794
133.0	-1.0255530388561453	-0.3490672249616042
133.0	0.9038983506790973	-2.203864915245285
134.0	0.8476849463926107	-6.914759773351515
134.0	2.876317234238554	4.656044669264208
134.0	-3.4355078842521496	8.141635740703661
134.0	-0.28849429637899504	-5.882920636616333
135.0	3.280749731829284	0.8308127797562629
135.0	2.6117860562332442	2.422579277557886
135.0	-2.117810090283237	-0.012147037658111967
135.0	-2.356361089403925	-1.6044831823787216
135.0	-1.4183646083753851	-1.636761837277371
136.0	-0.3632547815986629	-0.16732439331603763
136.0	-0.010735881524414901	-0.6983891039924588
136.0	0.3739906631230788	0.8657134973085034
137.0	2.122525852136281	9.244215085882892
137.0	-11.902471032170824	4.87473313114517
137.0	1.4553981017991766	-8.167849488186382
137.0	8.324547078235371	-5.9510987288417025
138.0	-0.4819814677315762	2.080099789142966
138.0	-1.7902634304431513	0.43707311028312
138.0	0.9588372761132301	-1.2265488800449342
138.0	1.3134076220614879	-1.290624019381197
139.0	2.4056342698860913	-7.6840614332998145
139.0	-3.1200540680428004	11.432188605696476
139.0	-3.341289624025595	11.595674626051164
139.0	1.9186858067987256	-7.62319539076193
139.0	2.1370236153835633	-7.720606407685893
140.0	3.0580271694833363	0.027722941169193945
140.0	-3.068251547674884	1.0609378796772442
140.0	-2.6978086397103715	-0.3897187614608052
140.0	2.7080330179019207	-0.6989420593856129
141.0	-3.9192911055039383	-0.2554281983812845
141.0	5.077188234555011	-1.4170261352512448
141.0	-1.1578971290510722	1.6724543336325293
142.0	-1.2569137636788703	-1.1505802593843628
142.0	1.7113592022397963	1.1559066405250191
142.0	0.7316815131632882	0.9160263321125774
142.0	-1.1861269517242101	-0.9213527132532492
143.0	1.7614872149854357	3.023863505496002
143.0	-4.6343670040826215	-3.309698069968569
143.0	-0.9113370816356714	-2.2177200492349978
143.0	3.784216870732847	2.503554613707563
144.0	5.223262531815037	0.37910797490943904
144.0	-0.1608836709411519	1.8304792761638955
144.0	-4.862468977454941	1.4863045185154682
144.0	-9.33759639915106	-1.0239264548418217
144.0	2.8412986719185653	-1.54926947891956
144.0	6.296387843813581	-1.1226958358274042
145.0	-2.0917343137285664	-2.625515549416286
145.0	1.67620091162475	-2.8438844929835394
145.0	4.271997783405513	-1.2464179977763747
145.0	4.793173018864858	5.930216593490765
145.0	-8.649637400166556	0.7856014466854494
146.0	-2.77025822067387	0.23778562576733572
146.0	-0.4146779601533011	-1.5121599244231554
146.0	3.244380114885605	-3.211092662397723
146.0	1.5385406735691183	2.0421135230898173
146.0	-1.5979846076275592	2.443353437963713
147.0	-2.488961308886127	0.34566145793598296
147.0	1.7624198349486244	-1.81935975639642
147.0	1.5632336049784383	0.056290876263080256
147.0	-0.8366921310409294	1.4174074221973543
148.0	0.27088999362462657	-0.1918929814917819
148.0	-0.49830265250444705	0.925460255569069
148.0	0.22741265887983628	-0.7335672740772746
149.0	1.1441557155362292	0.9504867943778055
149.0	-2.516076279999267	-1.4578951545219547
149.0	1.3719205644630241	0.5074083601441578
150.0	-4.996735529497527	-5.693902593841509
150.0	9.118762264338907	6.79176098745021
150.0	6.810044880127556	7.669427874121903
150.0	-4.641226396095802	-3.52230689113324
150.0	-6.290845218873134	-5.244979376597361
151.0	3.0103818263322206	-10.179405811230959
151.0	3.791097621410162	-10.456465408953632
151.0	16.841961969881243	-0.11366852703002722
151.0	-3.9943920110434155	11.62853131240821
151.0	-9.075475200173564	12.201065071366589
151.0	-10.573574206406645	-3.080056636560183
152.0	0.3847568505886269	0.035211622924948956
152.0	-0.4147408204942425	0.38458875580886187
152.0	-0.33222505412030623	0.10831494024762912
152.0	0.3622090240259695	-0.5281153189814412
153.0	1.6868480568827375	0.758410378249381
153.0	-1.400100175281538	1.4160537285173675
153.0	-1.9794662790281605	0.9323738669470447
153.0	0.7986759575177791	-1.5377091621413697
153.0	0.8940424399091546	-1.5691288115724167
154.0	2.0375296619820418	-11.60029377425239
154.0	6.069320345946797	-4.862343618555579
154.0	-3.537940271396784	9.15134548963547
154.0	-4.568909736532049	7.311291903172506
155.0	-0.05856212228327731	0.07251612980119232
155.0	-0.08702730139929077	-0.28484223530032027
155.0	0.14558942368254307	0.21232610549914147
156.0	-0.5360156726283845	-0.7534921011646427
156.0	0.8176537562518217	0.6788678048944206
156.0	0.4172188198610787	0.7900873111078405
156.0	-0.6988569034845054	-0.7154630148376483
157.0	-0.82566324173289	3.69876393097093
157.0	-1.0788568998535033	-2.579056247234855
157.0	1.1011423421978548	-2.632082014529749
157.0	1.330473287453546	-2.146176534903429
157.0	-0.5270954880650298	3.6585508656971113
158.0	0.7937270536065806	-0.10182841146803466
158.0	-0.24155823644429722	1.1919925142482393
158.0	-0.5521688171622832	-1.090164102780205
159.0	3.2525671232396265	10.174798402009387
159.0	2.9354621238364254	9.993106584660463
159.0	-3.6493229565410594	-9.380549353980147
159.0	-2.538706290535012	-10.7873556326897
160.0	-0.8205201411155589	1.304442689192809
160.0	-2.0293782452607663	-2.5646159927385783
160.0	2.197708298446829	-1.797888164291894
160.0	0.6521900879295103	3.0580614678376663
161.0	1.310779193446513	0.08672529282590102
161.0	0.1060875918238436	1.096111400413793
161.0	-1.4168667852703656	-1.1828366932397072
162.0	0.410446340238294	1.0113898661887255
162.0	-1.1447976717774282	-1.8704317694565173
162.0	0.7343513315391342	0.8590419032677918
163.0	0.05435491971524964	1.7593441805636976
163.0	-0.41652161936831733	0.5396141029752041
163.0	-0.7758404363545334	-0.7885912223450289
163.0	-0.40506717510528895	-2.289553977059313
163.0	1.0786562789987462	-0.8171482755444167
163.0	0.46441803211416544	1.5963351914098316
164.0	0.7542778623751802	0.548087784437937
164.0	-0.2513776920314003	1.0587904581834526
164.0	-0.5029001703437913	-1.6068782426213981
165.0	-0.24511800155257105	0.9925712247064667
165.0	-0.7365387543193253	0.6742188346536502
165.0	0.9816567558719083	-1.666790059360109
166.0	-2.396336434346875	7.579277170649558
166.0	-4.237005465805628	6.770292076146359
166.0	-7.1794083786152605	-3.2213022601790087
166.0	-0.6555110605478844	-11.672441932833188
166.0	14.46826133931559	0.54417494621629
167.0	1.189238332357014	0.25929622251959916
167.0	0.9009275450417357	1.21060622934557
167.0	-1.198815361831007	-0.15713981741659955
167.0	-0.891350515567708	-1.3127626344485768
168.0	4.228067146851271	-0.13562949572280278
168.0	-1.340155823565936	1.1535677516594893
168.0	-4.279585956346739	0.16963385370641254
168.0	1.391674633061419	-1.1875721096430938
169.0	-1.2937685121683142	-0.23966278058696663
169.0	0.7071643793092259	-0.4317820121862776
169.0	0.5866041328590885	0.6714447927732514
170.0	2.647733324615271	-5.356573902295193
170.0	5.750699850852865	-0.7439000778298146
170.0	-1.3413553288996278	3.265903578067244
170.0	-7.0570778465684985	2.834570402057777
171.0	-1.6332964734963262	-12.540942684203504
171.0	3.426256341989195	8.035707428438739
171.0	3.5049078416836146	11.79633819553106
171.0	-5.297867710176492	-7.29110293976629
172.0	10.145573483741279	1.7443007496998402
172.0	7.275483962206302	2.255277028184816
172.0	-9.55552689295198	-1.900339760344419
172.0	-7.865530552995592	-2.0992380175402436
173.0	-0.940357422620767	3.183994962261564
173.0	-0.3389124792302838	-3.3272320576948533
173.0	-0.24550301341655506	-3.1967087822927955
173.0	1.524772915267614	3.3399458777261004
174.0	-1.8341748166052312	3.256868778795828
174.0	-5.955731167645064	3.488824575211467
174.0	-3.887211050374516	-1.6334375586317054
174.0	6.7187289226578315	-5.678302891079946
174.0	4.958388111966988	0.5660470957043685
175.0	-1.6867232999183561	1.317137985342618
175.0	0.9999830217367894	-1.6022076622377168
175.0	1.4030389302151227	-1.3090964888279126
175.0	-0.7162986520335323	1.5941661657230273
176.0	-0.16985395811953014	-0.8136627643930672
176.0	1.830531056460975	-2.925027995891159
176.0	2.5191471924310425	-2.3439729494968895
176.0	1.5303247223380712	-0.9680308494876655
176.0	-2.8547403812030723	3.529997727768527
176.0	-2.855408631907453	3.5206968315002807
177.0	2.1046567826729454	3.987580048034174
177.0	2.081189596135861	4.062010450863777
177.0	-1.6501158928870863	0.650137125832815
177.0	-2.3437874056257684	-1.252097574552815
177.0	-1.5573958320234278	-3.491872680296696
177.0	-0.8241830508776675	-3.7160658753481597
177.0	2.189635802605154	-0.2396914945331051
178.0	0.11922773793819727	-4.947168610817099
178.0	5.832167178348127	-6.293719535871248
178.0	-1.709109981826049	5.749343323393055
178.0	-4.24228493446026	5.491544823295288
179.0	-2.0516762753030156	-2.2235879204923656
179.0	1.084309509495985	0.06596565199845084
179.0	1.8849316508726237	1.87541361817657
179.0	-0.9175648850655911	0.282208650317346
180.0	0.03058982309651335	-0.09768826889335645
180.0	0.008512248054309203	0.07857736982911621
180.0	-0.03910207115083717	0.01911089906424115
181.0	-1.9231095196383763	0.2983805842804121
181.0	0.982051681871294	-1.0187550064901476
181.0	1.7651550031811507	-0.3964057362039545
181.0	-0.8240971654140684	1.116780158413674
182.0	-0.040898802684341685	-3.581120242296904
182.0	5.365085855289003	-6.027542839420304
182.0	-0.8966383170549183	4.491280863230085
182.0	-4.427548735549732	5.117382218487132
183.0	0.12352366226115263	2.439586043928734
183.0	-2.7085120435441348	0.8782624517927672
183.0	-2.400512091997202	-0.4421148963136559
183.0	2.5383742584031395	-1.7882959011611146
183.0	2.447126214877053	-1.0874376982467724
184.0	-3.3816175778766935	2.468283782195076
184.0	-2.901404729839594	0.20556037170617275
184.0	1.495355266422527	-2.5035326532314377
184.0	7.333455637817597	-3.8772404079933596
184.0	-2.5457885965238467	3.706928907323539
185.0	-0.37541730851494043	-3.6248544441646136
185.0	0.8341032655433827	-2.6131258708296863
185.0	1.3929093592902584	1.0137747294735637
185.0	-0.28685565086375675	1.8708177358374773
185.0	-0.5932810592191002	1.8243559522233683
185.0	-0.9714586062358602	1.5290318974599133
186.0	-2.135329008081984	-0.4964276823284856
186.0	4.323937647403379	0.1001169330309367
186.0	-2.1886086393213953	0.3963107492975489
187.0	1.7155855026090043	-0.5858470182686845
187.0	-2.3631918260403717	2.686894256421439
187.0	0.6476063234314137	-2.1010472381527316
188.0	3.1262455287649313	-2.0857047204207055
188.0	3.599788725124518	0.8799892892807539
188.0	-1.3327555023536386	1.392918608116851
188.0	-5.393278751535841	-0.18720317697690922
189.0	-1.8831797621013708	0.7532712738291211
189.0	1.438435371282839	-2.027206474550633
189.0	1.7269669560676757	-2.008140415272261
189.0	-1.282222565249154	3.2820756159937714
190.0	-3.9633814434758365	2.5795308712804204
190.0	4.366429520512494	-4.380238436484597
190.0	-0.40304807703667805	1.8007075652041573
191.0	2.927455281888833	1.4931039225055944
191.0	1.4713749490860688	1.5938436810789929
191.0	-3.54988379855996	-1.9693026481849225
191.0	-3.758793782519787	-2.590859776400234
191.0	2.9098473501048607	1.473214821000545
192.0	0.03441953790533711	1.4037114986175074
192.0	-0.28113387613004603	1.506810755694077
192.0	-0.670245947692851	-2.6453528986704065
192.0	0.9169602859175795	-0.2651693556411747
193.0	0.029665277779274104	-0.014492898945336315
193.0	-0.014967726578258154	0.00895296807630956
193.0	-0.014697551201007892	0.005539930869038985
194.0	-1.4124430991146917	0.30943270336064455
194.0	-0.5293141887213444	-2.875010101786979
194.0	0.43556378958406966	-3.309364716647787
194.0	2.029391655891681	2.1302699319549805
194.0	0.818587141966329	2.8447042273059315
194.0	-1.3417852996060744	0.8999679558132437
195.0	-6.235756142186669	4.468544677266619
195.0	-5.863052396391448	-3.1888033345388433
195.0	6.596136655025783	-3.3507204163894637
195.0	6.71855591052734	-3.294631843681793
195.0	-1.215884026975004	5.365610917343439
196.0	10.414731793206977	7.842569858849917
196.0	-11.630841503542786	1.0697570308109203
196.0	-8.760231126061903	-5.72094100149169
196.0	9.97634083639772	-3.1913858881691324
197.0	-1.6841529915067088	1.396551238507769
197.0	-1.647762413727021	-1.4723870514986488
197.0	-0.7158882880281771	-1.8877139866873325
197.0	4.047803693261926	1.9635497996782187
198.0	0.546116769771148	0.1546007596440418
198.0	0.5391192851951959	0.1944099308815479
198.0	-0.5424903713945665	0.30271537015529415
198.0	-0.5427456835717875	-0.6517260606808537
199.0	-0.84970057872767	0.6447561849332097
199.0	1.4489394188008224	-1.9712277472016444
199.0	-0.5992388400731444	1.3264715622684353
200.0	-8.707520556286259	0.21701148095082767
200.0	8.478175607487376	-4.775565658340177
200.0	7.99550060014441	-0.22198518398537928
200.0	-7.7661556513455405	4.780539361374731
201.0	9.663987286038331	-11.290539618706484
201.0	9.502623533984304	-8.436650951199734
201.0	5.139842774962976	6.769379944862288
201.0	-3.0535743138445977	10.665237914102043
201.0	-21.25287928114104	2.2925727109419
202.0	-0.24738267123131974	-0.5070316405400273
202.0	0.24659097302558539	-0.2388608031981236
202.0	1.4798021464787745	1.2065344145623198
202.0	-1.4790104482730653	-0.4606419708241495
203.0	-2.5935116849398194	1.2397580945467834
203.0	-0.40095941544733427	-4.864615917467954
203.0	6.630731515865881	-2.6160095725515013
203.0	-3.636260415478693	6.24086739547268
204.0	8.723841729668925	0.2864423490550405
204.0	-0.8690650614840363	11.791317665765321
204.0	-3.418809538016218	5.313254494075505
204.0	-3.934249620211304	-6.757737563431486
204.0	-0.5017175099573261	-10.633276945464422
205.0	3.2998912463135017	-0.05806406824071724
205.0	-0.002611158107439276	4.065812489650367
205.0	-2.862658978250717	-0.7890232225649559
205.0	-0.4346211099553315	-3.2187251988447008
206.0	0.5142364834841736	-1.1925021654084456
206.0	1.129634843012876	-1.4164282052190247
206.0	-0.6777299411536923	1.2525900020545513
206.0	-0.9661413853433474	1.3563403685729294
207.0	0.22257337452251835	0.42617359270207134
207.0	-0.20290367315448074	0.04693484427386696
207.0	-0.01966970136799581	-0.47310843697592986
208.0	-1.3873612622880702	-0.9793338551720648
208.0	1.337168988732419	0.3004511158421255
208.0	1.3969646565924838	0.9610374961637546
208.0	-1.3467723830368312	-0.2821547568337994
209.0	-0.820052423800974	1.2720066867863116
209.0	-0.08330943905130737	-0.6616546887303382
209.0	0.9033618628523015	-0.6103519980559722
210.0	-2.593858852127194	-1.2554017455441084
210.0	3.2287376989061687	-0.9871831535769654
210.0	2.07854625843291	2.3744733389480435
210.0	-2.713425105211891	-0.13188843982696682
211.0	7.2780567864399295	-1.3848323385289427
211.0	0.7806369241067462	8.429754070120524
211.0	-1.3870673039391472	7.180329001255438
211.0	-12.369759326753421	-8.469570720760323
211.0	5.698132920145891	-5.755680012086699
212.0	-0.353928149587346	0.39077767304718247
212.0	0.487318595437157	-0.7545768569410728
212.0	-0.13339044584978477	0.36379918389387234
213.0	0.9685812573502606	0.5403953668092935
213.0	-0.8102339821935349	-0.11110468386119535
213.0	-0.15834727515673158	-0.42929068294810707
214.0	-1.3144148072848252	-0.03986855199899209
214.0	-1.345767642712093	-0.3899906277093316
214.0	1.2152039091317808	-0.7436419816167009
214.0	1.4449785408651603	1.1735011613250028
215.0	-0.1151841170680361	0.6447341843390696
215.0	-0.12747955064204858	-1.4984554203627045
215.0	0.291864547699201	0.23803158105062724
215.0	-0.049200879989108146	0.6156896549729893
216.0	-0.23901469210630294	1.647851379218437
216.0	-2.229719379613152	0.3906943091451222
216.0	2.4687340717194637	-2.03854568836352
217.0	-1.3050694512774994	0.9427470733187322
217.0	0.8843431809392642	-1.404514634105277
217.0	1.16079074680853	-1.601247674631632
217.0	0.45473427732981053	0.40019716484640344
217.0	-1.1947987538001184	1.6628180705717794
218.0	0.710509889659445	0.4572549345828444
218.0	0.12047008272103392	1.3654714341271423
218.0	-0.466442924249908	-0.22299315810433254
218.0	-0.36453704813054555	-1.5997332106056674
219.0	0.15723382347671513	-0.9453951773503845
219.0	0.9293875976694297	2.3245749038659835
219.0	-1.0866214211461458	-1.3791797265155699
220.0	-2.13570459082636	2.5208196211081084
220.0	-1.695793913522368	-3.7625042778047493
220.0	4.527535490521858	-1.5404656909938035
220.0	-0.6960369861731458	2.7821503476904725
221.0	1.873878254539344	2.5487087780719757
221.0	-4.859342155833781	-3.535828683533524
221.0	-4.918861174194375	-4.132511948705142
221.0	7.904325075488812	5.11963185416669
222.0	-0.15468620947446562	0.03653701121549215
222.0	-0.030134768737346374	-0.09198230437301066
222.0	0.18482097821180096	0.05544529315750954
223.0	1.8585358882594916	2.20072434711926
223.0	-0.020133789859674636	5.264514787274
223.0	-2.6290457060210892	-6.523019267181518
223.0	0.7906436076212789	-0.9422198672117552
224.0	0.478112668817888	0.24274678166205996
224.0	-1.337124327049052	1.2216952291568144
224.0	0.8590116582311795	-1.464442010818877
225.0	-1.2136395978857115	-1.0216188431583442
225.0	-0.39066932832926954	-1.8788696702133256
225.0	1.0007578726770485	-0.1599315778174668
225.0	2.0801465899423737	3.321911082455344
225.0	-1.476595536404434	-0.26149099126624226
226.0	0.45949073987075234	-0.7609698752048961
226.0	1.734194380955825	-0.6469403212518043
226.0	1.6820525368526917	-0.5052799501817792
226.0	-0.791669322018116	1.0654468221147253
226.0	-3.0840683356611795	0.8477433245237359
227.0	-3.777408065240672	0.6521525489213371
227.0	2.037617203634892	-2.4514653187288085
227.0	3.6619683696795113	0.21245537345046434
227.0	-1.9221775080737338	1.5868573963569972
228.0	-0.7321964936336841	-1.886088841213603
228.0	1.0026735837308423	-1.1348641795974188
228.0	-0.08133184667516158	1.5398965839339687
228.0	-0.18914524342198372	1.481056436877044
229.0	1.461019092569129	2.352794049100954
229.0	-1.121203632166737	-0.3095761256260769
229.0	-0.5279653434642668	-1.0896491404686537
229.0	0.18814988306184338	-0.9535687830062289
230.0	-0.019609921816975108	-0.4735132680685946
230.0	0.20138623191159494	-0.6339496295214749
230.0	-0.18177631009461753	1.1074628975900556
231.0	1.2906706663141858	-4.560648991061437
231.0	-1.084622506370772	4.303943711869667
231.0	-1.2047163156967207	4.485096866995764
231.0	0.998668155753304	-4.228391587803981
232.0	-0.1327613719586575	1.5949679412318558
232.0	-0.3814691980963165	0.46566764562319335
232.0	-0.5250892287706516	-0.8485195333236433
232.0	1.0393197988256109	-1.2121160535314073
233.0	2.1210904908326156	-3.113991410427855
233.0	-1.3048668548379685	3.686436785000403
233.0	-0.8162236359946747	-0.5724453745725573
234.0	-0.9708603348746574	0.9601922214625698
234.0	0.5751210434340267	-1.2755603839603629
234.0	0.3957392914406307	0.3153681624977931
235.0	-3.5016290007097126	-2.209155372838827
235.0	-2.9024558144296564	-3.5786355316093252
235.0	-0.9329355456919476	-2.614990930637875
235.0	7.733638089377113	6.328313918970536
235.0	-0.3966177285458213	2.07446791611548
236.0	-0.990438490346883	0.8931596928456793
236.0	0.08493906950064319	-2.0311258784205832
236.0	0.9054994208462567	1.1379661855748928
237.0	-1.848738361859436	0.3368772911246126
237.0	-0.029658815171140288	-1.3915514953048895
237.0	1.8740684542253994	-0.28472919227843446
237.0	0.004328722805160565	1.3394033964586882
238.0	-0.5406771424145892	-0.43580555159981166
238.0	0.18263193498891403	0.029115718998070698
238.0	0.3580452074256845	0.40668983260173025
239.0	-1.7067466589835496	1.1296478713145084
239.0	-0.13298201447515692	-4.323551492726629
239.0	0.9251415914150026	-2.474556184701041
239.0	1.1055769674158544	0.9990382409875515
239.0	-0.1909898853721922	4.669421565125622
240.0	0.7756179240652917	0.03825446524686138
240.0	-0.3809982580880364	1.405815843261537
240.0	-0.8558725219828596	-0.16113384320271734
240.0	0.46125285600563287	-1.2829364653056465
241.0	1.2914662143022066	-1.1385411003249928
241.0	-0.4755020144339197	1.0940418844152153
241.0	-0.5485796321824052	0.9499502949108004
241.0	-0.267384567685909	-0.9054510790010342
242.0	10.097102036895462	-7.5574671423228414
242.0	10.021364520867412	-6.590720703437301
242.0	-6.420299557891809	7.6503258715652365
242.0	-7.352866417284794	7.442667420062468
242.0	-6.345300582586299	-0.9448054458675627
243.0	0.6073549121892365	0.8473062045487139
243.0	-0.9184934382054719	0.011663898745299996
243.0	-0.2826382186992438	-1.6569972025917514
243.0	0.5937767447155071	0.7980270992977321
244.0	-1.2931993646514242	2.2957021700893767
244.0	-1.4806184021870428	-0.17373849489568494
244.0	1.3576358691610548	-1.1280808363636383
244.0	1.4161818976774272	-0.9938828388300585
245.0	4.218345439039932	9.018829454135489
245.0	-6.610348365243496	-6.954211147732415
245.0	-2.3166580155494763	-6.936534357469645
245.0	-1.0061583167372157	-5.552419149979307
245.0	5.714819258490254	10.424335201045878
246.0	0.5452446172863107	-0.565740958779068
246.0	-1.0697824441874955	1.1509772930424367
246.0	0.5245378269012139	-0.5852363342633817
247.0	1.1324808046593995	-0.3930989259233401
247.0	-0.5450274521801224	0.8214327264474387
247.0	-1.8198097397020023	0.1964158650218202
247.0	1.2323563872227175	-0.6247496655458944
248.0	0.2251700841874958	0.3944431547191872
248.0	-0.6838015849092595	-0.025216131557661708
248.0	0.11885488257573275	-0.6520957597398047
248.0	0.33977661814603466	0.28286873657829475
249.0	-2.3886107351222	2.3513978569622798
249.0	-2.546607402002668	1.402604900467868
249.0	2.270288291320793	-1.8611689771361928
249.0	2.664929845804075	-1.892833780293955
250.0	1.0564839718090178	0.6838775632344821
250.0	0.7137322814916043	1.1669208789633787
250.0	-1.1301096657804075	-0.4715908941204649
250.0	-0.6162748333850971	-0.7255722790394761
250.0	-0.023831754135089728	-0.6536352690378845
251.0	0.5971989971897914	-1.369700166979411
251.0	0.5307952697700805	2.7099331996220304
251.0	-0.30958806413955425	1.1907705957744346
251.0	-0.8184062028203178	-2.531003628417054
252.0	0.6785701636120357	-0.9723970517779382
252.0	0.8353872111224564	-0.9144728749272837
252.0	-1.5139573747344823	1.8868699267052322
253.0	-1.3019662070540756	1.0151625115645209
253.0	0.23772160383752244	-1.0745003250495422
253.0	1.0642446032165223	0.059337813485028125
254.0	1.761374454328873	1.2423728471341187
254.0	-0.823474928562911	-0.09577470134909322
254.0	-1.485459093992999	-0.8728124638987126
254.0	0.547559568227053	-0.2737856818862948
255.0	3.2130508850667487	-3.751258525658822
255.0	0.3608203949717887	3.7371316859565034
255.0	-3.573871280038537	0.014126839702332555
256.0	-0.22231927045410174	1.7175946067592878
256.0	-0.5894289216368013	-1.512952642830824
256.0	0.3279042840885388	-1.8956950255578338
256.0	0.4838439080023495	1.6910530616293837
257.0	0.725460119111046	-5.399198224757526
257.0	5.217474541565101	4.695641238651064
257.0	-1.7684900358826114	10.50788966815588
257.0	-4.174444624793526	-9.804332682049429
258.0	6.836145570898221	-2.9281647273134754
258.0	4.828327399605302	-1.5630977933663917
258.0	-8.505139884771042	6.881896079626178
258.0	-8.62241142651674	6.163027025958512
258.0	-1.1289576760494173	-3.7639577607731716
258.0	6.592036016833673	-4.789702824131656
259.0	-2.7958718030915253	2.0655288514174623
259.0	-0.7106142576671569	-6.827491865229833
259.0	1.525337311301732	-4.167192443657466
259.0	2.9201761127935613	5.1845890342754055
259.0	-0.9390273633366084	3.7445664231944016
260.0	-3.557465810479546	2.330367469563893
260.0	2.553169779633262	-4.395691708500097
260.0	4.146337258533011	-1.8512906736388997
260.0	-3.1420412276866956	3.9166149125750565
261.0	-7.522912936947417	-3.5730537835765968
261.0	4.491729253184268	-1.9567782413291555
261.0	4.040528465416889	2.2378208489953635
261.0	2.882788575763283	2.3038750100425767
261.0	-3.8921333574170327	0.9881361658678104
262.0	3.0056341841012	4.332678237675983
262.0	-2.204212808539637	4.315368643093794
262.0	-1.3301771303523857	-4.0313557176853605
262.0	0.5287557547908025	-4.616691163084455
263.0	-2.3878366458839406	-0.5969102365896535
263.0	3.873955798011347	-0.8870852770540896
263.0	0.6682359527689613	1.57713261224099
263.0	-2.1543551048963323	-0.09313709859727054
264.0	-1.2505601410001415	-0.7253270298082166
264.0	-1.1513156100300366	-0.7664855655115261
264.0	2.397938976843265	-0.6620595110077365
264.0	1.2960659122909433	1.0245914422217728
264.0	-1.2921291381040516	1.1292806641057043
265.0	-2.5716459403543204	-1.8263071194472709
265.0	1.2402149291990252	-0.937605975142234
265.0	2.682684526657258	2.3487844693953086
265.0	1.0123651808714897	1.832490584479798
265.0	-2.3636186963734516	-1.417361959285586
266.0	3.1300954670852263	1.8262521560241372
266.0	-2.859163027139061	1.5448457168654723
266.0	-2.389884941996956	-1.4225260014647199
266.0	2.118952502050804	-1.9485718714248934
267.0	1.9703684694402446	0.6829385655837024
267.0	3.0837389439812264	2.5995385756159437
267.0	2.991935528338356	3.0526359489961346
267.0	-3.2072772250544173	-1.1486385582493863
267.0	-4.838765716705424	-5.186474531946351
268.0	2.8581851831575937	0.29421771162650423
268.0	-1.3843542791637327	0.5896539231615687
268.0	-2.3030250172397064	0.2214295838208562
268.0	-2.6751686781057913	-0.5162735699865949
268.0	0.5725455214290202	-0.3672423251637648
268.0	2.9318172699226306	-0.2217853234586264
269.0	2.8529116562429775	-1.4229409185469732
269.0	1.0296886186932912	0.7759818431927137
269.0	-0.6943734549278273	0.9081964447734546
269.0	-3.1882268200084507	-0.2612373694192083
270.0	4.213985728504786	-0.29792378654862783
270.0	2.725361691910994	2.314528123041835
270.0	-2.040978955544552	2.590984972589392
270.0	-2.8170996571205005	1.4222974589553978
270.0	-6.282671548388294	-5.445432995677978
270.0	4.20140274063753	-0.5844537723600143
271.0	0.8295479197407817	1.1486463399636246
271.0	0.6814181744460918	1.2411173181854955
271.0	-1.129957411149898	0.6185687885269703
271.0	-0.6086548224446102	-1.21496822026881
271.0	0.2276461394075774	-1.79336422640728
272.0	-1.6293835175161457	-4.959640650470633
272.0	8.238787170076188	7.225375511646259
272.0	5.396691665102816	6.493762859864411
272.0	0.7458027113687119	3.158736579076808
272.0	-8.495742842610538	-5.877912115185128
272.0	-4.256155186421084	-6.040322184931722
273.0	-2.417301380635237	1.7072885933246167
273.0	-2.4249498363448154	1.6535348797573923
273.0	1.1837567641362363	-3.6034980166510784
273.0	1.5617275266174782	-2.061417944544992
273.0	2.0967669262263606	2.3040924881140286
274.0	1.5084086556234253	0.6495755230585155
274.0	-0.42738607630842074	0.0642303265029589
274.0	-1.0810225793150097	-0.7138058495614804
275.0	0.06066039140602816	-0.39398477757320977
275.0	0.1069494578376469	0.21756193503003454
275.0	-0.09957387975875145	0.5589420662179181
275.0	-0.06803596948490973	-0.38251922367477137
276.0	1.914936876743046	-2.0755925118023106
276.0	3.361003548510438	-2.042658662148832
276.0	2.6708788035870303	0.2049252467507085
276.0	-3.844311902779424	3.7726312408099187
276.0	-4.859866962780772	1.7774684046495586
276.0	0.757359636719664	-1.636773718259067
277.0	-1.643458283709574	0.6302042925593454
277.0	-0.4360261999274228	-0.817517031512758
277.0	1.139805462536812	-0.6288375067141941
277.0	0.9396790211001881	0.8161502456675929
278.0	1.0785317437779396	-1.8886553772569152
278.0	-0.5150368934702152	0.945069553272595
278.0	-0.5634948503077244	0.9435858239843202
279.0	0.7113863867367439	-2.154477159633488
279.0	0.002043147446400326	2.198360140157547
279.0	-1.0845697819769267	2.1351109067619154
279.0	0.37114024779375415	-2.1789938872859747
280.0	-0.657106956117997	-0.5544963098395814
280.0	1.8721552332235654	0.6880908397470544
280.0	-1.2150482771055595	-0.1335945299074619
281.0	-0.14514845512351734	1.1767563441235254
281.0	-2.154864882690318	-1.8686101892323563
281.0	0.6675503653781898	-1.0290376205955298
281.0	1.643387636883199	0.4721987474954709
281.0	-0.010924664447536946	1.2486927182088507
282.0	0.39121877900072777	1.4288815976487361
282.0	-1.0570301573031278	1.4268727423115966
282.0	-1.436447666802732	0.852050543494619
282.0	0.05401245634601251	-1.5801242211830542
282.0	2.048246588759116	-2.127680662271891
283.0	0.1011853279334705	-0.0859819724567891
283.0	-0.03523260796787496	0.10159006608449297
283.0	-0.06595271996560906	-0.01560809362769949
284.0	-0.9313207924803817	-4.668888969716788
284.0	3.016494108864559	-1.1080859746983422
284.0	-0.37004318154223176	3.2970633153629545
284.0	-1.715130134841951	2.4799116290522036
285.0	-1.4311401022628536	0.46793194545749545
285.0	-3.692729600188386	-1.2979165950643254
285.0	-1.489579326347272	-2.428189835982171
285.0	6.613449028798513	3.258174485589
286.0	2.407052821225315	2.327223078921388
286.0	2.7216805995716284	4.014024711872748
286.0	-2.803885964364909	-2.9155342517588854
286.0	-2.324847456432022	-3.425713539035258
287.0	0.9575024308293499	1.0675393588573365
287.0	-1.3453640873837494	0.131543539994939
287.0	0.38786165655439936	-1.1990828988522755
288.0	-2.2847021033299724	1.4311069848704006
288.0	-3.100753483337477	0.2504219857902054
288.0	2.2004656826967244	-1.7470542702668368
288.0	3.184989903970732	0.06552529960623252
289.0	1.8915241387949504	-0.35613521018944955
289.0	-0.08468425370642067	1.1067219957429697
289.0	-1.8068398850885439	-0.750586785553527
290.0	8.490765908813117	-6.078544866759665
290.0	-3.0224706034475672	3.5042515599624835
290.0	-2.889237318975015	1.986526707885951
290.0	-2.579057986390561	0.5877665989112066
291.0	-0.5200741783641046	-0.5299266773417104
291.0	0.1507333218431451	-0.44349927177265214
291.0	0.3693408565209576	0.9734259491143595
292.0	0.31172451887037217	-0.8737241912598908
292.0	0.7002357570488659	0.41948815865585165
292.0	-1.0119602759192154	0.45423603260406137
293.0	1.9173107290284437	1.2193266767458384
293.0	1.5748438434745027	2.3176716895109073
293.0	-5.692516271306488	0.7237060254939641
293.0	2.200361698803545	-4.2607043917506875
294.0	1.9546065669182129	-1.2383389407663994
294.0	-0.7482450324479495	2.3896036257115605
294.0	-0.8775748795536267	2.2609754047264934
294.0	-0.3287866549166545	-3.4122400896716134
295.0	-3.7107082293754767	-1.373012004109734
295.0	4.284186998984273	-0.7000465613668773
295.0	1.8111795285657604	0.38907274678115517
295.0	-2.384658298174542	1.6839858186954662
296.0	0.5643444274620576	0.6197826350109811
296.0	-0.2597046102554752	-0.19079819264173925
296.0	-0.3046398172065883	-0.428984442369227
297.0	10.02668641279065	0.990748798064326
297.0	10.280935951254865	2.9209711300218046
297.0	-8.357757602092901	-0.9463288853566865
297.0	-7.919342153155143	-1.4954951833943573
297.0	-4.030522608797452	-1.4698958593350648
298.0	0.6930964692828504	-4.2048920237412934
298.0	1.798535096070585	-1.6591951118433517
298.0	-0.8653416091430861	4.137938479261243
298.0	-1.6262899562103894	1.7261486563234163
299.0	0.034644835365105674	0.0046227106156831845
299.0	-0.01888916611992781	0.017093727144402843
299.0	-0.01575566924516414	-0.021716437760089722
300.0	-0.06292936143888728	-6.275790460856935
300.0	3.2639954838211582	0.9664324698206038
300.0	2.174574867587611	6.257106292912207
300.0	-5.3756409899698525	-0.9477483018758556
301.0	-3.8273577861904085	-0.24633398617054433
301.0	-4.2312186905537414	-3.3282702637124117
301.0	-1.7717730685438096	-3.376141845468242
301.0	5.395679492431225	2.9559721130936505
301.0	4.434670052856729	3.9947739822575477
302.0	-0.08037486879445652	0.8592982293594136
302.0	-1.3329165537523424	0.48184760396671156
302.0	1.4132914225467794	-1.341145833326102
303.0	1.0439952352905273	0.8525483195987835
303.0	-1.0323346751717855	0.9947695959147789
303.0	-0.01166056011873731	-1.8473179155135473
304.0	-1.1973564344506218	-1.7703934259712415
304.0	1.3089614507045986	-0.09777247102097285
304.0	1.2507916904337117	0.7081280685087112
304.0	-0.01888904380408504	1.5155620261118832
304.0	-1.3435076628836025	-0.35552419762839593
305.0	2.9377331721814217	-4.879817210741579
305.0	5.210034160878419	17.43915649931597
305.0	-6.306669381225186	-3.5235743165393694
305.0	-1.8410979518346426	-9.03576497203504
306.0	13.731674839597277	-10.885302148169664
306.0	15.615039957499844	5.541889901697787
306.0	-6.806377090047691	9.38998831290402
306.0	-7.875995430044817	8.456841238197404
306.0	-8.525669096429182	-4.8174370486697065
306.0	-6.1386731805754176	-7.685980255959863
307.0	0.32047159118150526	1.705747152517346
307.0	-0.9876971079152485	-0.8718877602729239
307.0	-0.712751641647469	-1.0019884249485687
307.0	-0.6211462995445406	-0.9637441472979695
307.0	2.001123457925774	1.1318731800021686
308.0	-0.09923459219181295	-0.0829443772542097
308.0	0.3288314293898765	-0.03905174049779238
308.0	-0.22959683719804827	0.12199611775199765
309.0	0.6602011120596254	0.44174879207045936
309.0	0.7181293517715489	0.7401939667728574
309.0	-1.3783304638311613	-1.181942758843324
310.0	-9.787081509908784	4.074288971127483
310.0	-13.233874799798881	-4.0211943229369655
310.0	0.37343017342427043	-9.09624561161161
310.0	14.428185771553478	3.4695109977440706
310.0	8.219340364729911	5.573639965677023
311.0	0.08117519066359938	1.27910642424522
311.0	-2.175297712509311	1.283798315457955
311.0	-0.1342128807027205	-0.724025287014769
311.0	2.228335402548425	-1.838879452688407
312.0	-0.6987514286577778	-2.5721402841434364
312.0	2.954094769832216	-0.48074398371929133
312.0	0.28818171269814563	1.9541263630218553
312.0	-0.3484422643264969	2.483813647775953
312.0	-2.195082789546123	-1.385055742935057
313.0	-3.5422753440746395	-3.1704361804054253
313.0	0.4419458044961241	-0.82973392648558
313.0	1.9913250491001702	0.6562360399784357
313.0	1.1090044904783651	3.343934066912578
314.0	4.535955247529058	1.438453885366308
314.0	-9.926682754476538	-0.8926378582551348
314.0	5.390727506947478	-0.5458160271111803
315.0	-0.6112549251962248	-0.9513592198702433
315.0	1.047493052371494	-2.408583217500146
315.0	1.7227043793483408	-2.533785777984021
315.0	4.631442280332895	-2.099370525910006
315.0	-3.3823333771792967	4.01120686053346
315.0	-3.408051409677256	3.981891880730936
316.0	-0.439639075663186	-1.456163263090306
316.0	1.160087667415174	0.6145328683837421
316.0	-0.7204485917520181	0.8416303947065951
317.0	0.49979134854640817	-5.94631135624451
317.0	5.723805267317134	7.78518110949117
317.0	3.341907462568234	8.46454670007208
317.0	-8.101530541076443	-4.094392530602228
317.0	-1.4639735373553049	-6.209023922716518
318.0	0.3313324169513844	1.0105596422374468
318.0	-0.7842364097330095	-0.9667174476536872
318.0	0.05639139657545448	-0.694292230596219
318.0	0.3965125962061569	0.6504500360124555
319.0	0.3562239259803596	-0.4606839799576992
319.0	0.7781495313499183	0.5113869484420243
319.0	-1.1343734573302833	-0.05070296848433093
320.0	2.7815110632012443	-6.404011151879905
320.0	6.830363823071995	4.170615479155037
320.0	-9.611874886273238	2.233395672724853
321.0	-2.200502257661796	3.4598027104839697
321.0	-4.194965539531922	-2.515612528935177
321.0	3.391825261296324	-4.152689676575265
321.0	3.003642535897391	3.208499495026504
322.0	0.015333178712735098	0.054385729595805066
322.0	-0.018591656179337442	-0.03247516827912769
322.0	0.003258477466614289	-0.02191056131668785
323.0	-0.09653851303439694	-0.40475105229081737
323.0	0.36709097058194234	0.8190112444595902
323.0	-0.2705524575475454	-0.41426019216877275
324.0	-2.917448279987698	-1.8244217161513367
324.0	6.464907352936103	-0.6444096438259288
324.0	1.2537258977896824	1.7125174609521518
324.0	-4.801184970738107	0.7563138990250917
325.0	1.1162743036710756	0.23541588488840715
325.0	1.1206477156145451	0.6355204158606453
325.0	-3.087887651682488	0.35725291929483866
325.0	0.8509656323968537	-1.2281892200438866
326.0	1.567070389289071	-0.10260248600599772
326.0	2.9481360192479382	1.3115458070225552
326.0	-1.9606217039292664	-0.0795912870704333
326.0	-1.3070975222610157	-0.5659359890215212
326.0	-1.2474871823467266	-0.5634160449246031
327.0	5.624115363499751	0.8592054055733309
327.0	2.0934404230091554	7.156269674657274
327.0	-7.717555786508912	-8.015475080230608
328.0	-5.48164192802567	-0.5254151048686204
328.0	1.6277174209860485	-2.4376156559348763
328.0	3.910963984205532	1.0925011510553648
328.0	-0.057039477165880974	1.8705296097481428
329.0	-0.5631667542678327	-0.9687874333299678
329.0	0.3870986445253426	0.42204414384801703
329.0	0.17606810974245313	0.5467432894819718
330.0	-0.8290359655153952	-0.9750567140505868
330.0	0.48118251695469666	0.0799116741467747
330.0	0.3478534485606836	0.895145039903784
331.0	-0.2394464560368108	-0.12686446277147534
331.0	0.5016048486120098	0.23077301009050374
331.0	-0.2621583925751666	-0.1039085473189998
332.0	1.1945473697282756	-0.40816386311099273
332.0	1.1948022480078528	-0.37485637715362946
332.0	-1.2042071684790987	0.47101820342128936
332.0	-1.1851424492570337	0.3120020368433119
333.0	-0.4195501197267427	0.27250582226795367
333.0	-0.473555164921428	-1.270954847217835
333.0	0.8931052846481489	0.9984490249499001
334.0	1.2485959739958414	-0.14256657560326128
334.0	0.11302614717627901	0.33587470207491227
334.0	-0.5593517322285825	0.23451790548988144
334.0	-0.8022703889435452	-0.427826031961533
335.0	-0.6223841191155747	3.8217576417058234
335.0	-6.471148868687009	-0.7489338261397639
335.0	3.542970951902223	-1.858131845169896
335.0	3.550562035900368	-1.214691970396186
336.0	7.4761325378571915	-2.830302318597203
336.0	-4.222862656916765	10.712752167361963
336.0	-10.091200549267363	4.7607961526630245
336.0	1.3961671815296242	-5.807758327483292
336.0	5.441763486797301	-6.835487673944422
337.0	-3.6558918689876356	0.6127032794865208
337.0	1.4285979423830941	-1.8919799792523857
337.0	3.6484403859698364	-1.9333717948537774
337.0	-1.4211464593653018	3.2126484946196414
338.0	0.23308136190080125	0.3604058546748353
338.0	-0.42901010918721527	-0.0012961216719340378
338.0	0.19592874728644327	-0.3591097330029331
339.0	-1.4622826506252231	3.8318905028457957
339.0	-0.38848741068535947	-0.650237935907114
339.0	1.020610535313283	-2.484721563471832
339.0	0.8301595259973569	-0.6969310034668511
340.0	0.5552557525272075	0.3740102349330399
340.0	-0.4240902341105552	0.3784408898382139
340.0	-0.3122301584139218	-0.4021301409089477
340.0	0.18106463999726216	-0.35032098386232013
341.0	1.4114859062564078	-0.9811632700372481
341.0	1.1388838261636258	1.8508700003255258
341.0	-1.1012319105677946	0.33592232907665265
341.0	-1.4491378218522646	-1.2056290593649297
342.0	0.18239634514534656	0.4531500960499842
342.0	-0.46068810297408175	0.1230755900611221
342.0	-0.46339945357819917	-0.6866354598835598
342.0	0.741691211406947	0.11040977377244707
343.0	-0.06816300423665962	0.08270785625680536
343.0	-0.029316594890696674	-0.08610117466338499
343.0	0.09747959912735328	0.003393318406595226
344.0	2.0060164676432253	-1.5679390727619469
344.0	1.020128264334668	0.6521082255576908
344.0	-3.0261447319778814	0.9158308472042304
345.0	2.391109528247762	-0.7424532673189344
345.0	-1.8617016952306664	1.2033786951844623
345.0	-0.5294078330170846	-0.46092542786549806
346.0	-0.02346980079700537	0.23688949099148465
346.0	-0.1349065900217183	0.3429808824480027
346.0	-0.0721068030987114	-0.2892258091744404
346.0	0.23048319391743083	-0.2906445642650297
347.0	-3.653569623944702	3.2979531535065516
347.0	-4.91545630637999	-1.0259660832610102
347.0	3.8158791964871264	-8.686146668190728
347.0	4.753146733837573	6.414159597945184
348.0	-1.7885345273739746	-0.3184938628956222
348.0	1.396849493905952	-0.05653108343065214
348.0	1.5859726759448274	0.14212871201425858
348.0	-1.1942876424767763	0.23289623431201656
349.0	-0.0024035540789616857	-1.0200373875266846
349.0	1.4334717334479796	0.2553526182514758
349.0	-1.4310681793690143	0.764684769275195
350.0	-0.8839649196246381	-0.38765547001502304
350.0	1.6518674120474512	-0.7308607367116706
350.0	2.5377438768740714	0.09163940143902623
350.0	-1.3181183523744926	0.7923055238675933
350.0	-1.9875280169223648	0.2345712814200306
351.0	-0.29873795666263386	0.1053462574478673
351.0	-0.07411912890957359	-0.08649909415317164
351.0	0.37285708557218955	-0.018847163294684152
352.0	-0.09965342686556854	-2.5815437242258152
352.0	1.5819908696760792	-1.176617885381717
352.0	0.4932660892876586	5.39071388763656
352.0	-1.9756035320981429	-1.6325522780290374
353.0	3.3939744453782326	-1.7228521999894408
353.0	3.5132804120344203	-1.5997945760804104
353.0	-3.0442187028097893	1.746204706609151
353.0	-3.8630361546028866	1.5764420694606773
354.0	8.303662635689278	-2.802295742344055
354.0	-0.7309768781338845	4.005491722130625
354.0	-1.4092745619290927	3.5101449658109374
354.0	-4.2640810510798595	1.2157737310895949
354.0	-1.899330144546412	-5.929114676687072
355.0	0.41441572866363197	-0.6541941784197597
355.0	0.1099483817369432	0.7269710407466243
355.0	-0.5243641104005811	-0.07277686232686077
356.0	0.4406557821896533	1.071329371893412
356.0	-1.162913557830221	-0.6672108060575197
356.0	0.7222577756405746	-0.4041185658358943
357.0	-0.11657492208768831	0.3547665364200986
357.0	-1.0128132064225588	0.0677794713362904
357.0	1.1293881285102554	-0.4225460077563754
358.0	2.7323029966727965	-2.9168462757536404
358.0	-0.48996678268397104	4.11663594155271
358.0	-2.7646019579638894	5.393738289510497
358.0	0.5222657439750613	-6.5935279553095665
359.0	4.199695530147639	3.6423513127817086
359.0	-5.881909612703152	1.0553802182111884
359.0	-0.35899038832624613	-2.8774547717505916
359.0	2.0412044708817674	-1.8202767592423184
360.0	0.4362186427225884	0.11650983738613141
360.0	-0.5391957942666817	0.0829341726421103
360.0	0.1029771515440884	-0.19944401002825507
361.0	1.0790573160037784	0.6697582961304649
361.0	0.6089517564649273	0.8234319210392395
361.0	-1.4501519726924568	-0.5176920109794363
361.0	-0.23785709977624497	-0.9754982061902835
362.0	-0.13719641521225862	0.05429067253982788
362.0	-0.024722285131929183	-0.05963342552603954
362.0	0.1619187003442013	0.0053427529862160855
363.0	0.6678147824519061	1.4138717973512136
363.0	-0.8052367376956334	0.27751643512180263
363.0	-0.8985188298733587	-1.7892073618166537
363.0	1.0359407851170872	0.09781912934365776
364.0	-10.661041701646274	-0.5518857320665186
364.0	7.801215822783818	-3.3264341706357303
364.0	8.305887559718721	-2.655437121648404
364.0	-5.4460616808562685	6.533757024350655
365.0	1.678009183615104	3.9612107762330697
365.0	-6.272898150585967	-7.878999312814864
365.0	2.095715843936213	0.9763470324990239
365.0	2.4991731230346486	2.9414415040827637
366.0	2.2094522902604314	3.993363170381443
366.0	0.17740339080310052	3.5806308875527164
366.0	-1.1728585148018107	2.6938608726292066
366.0	-2.3552384853987784	-4.363137078069885
366.0	1.141241319137027	-5.904717852493479
367.0	0.36173820168027165	0.26058272731636767
367.0	-0.771967570109079	-0.4009191411950297
367.0	0.41022936842879715	0.14033641387868878
368.0	-0.4596942806503607	-0.22690161131298298
368.0	-0.08251667328235708	-0.6780244978406818
368.0	0.5422109539327278	0.9049261091536546
369.0	2.267135812856962	-0.13973313151864353
369.0	-1.4404812635999984	0.9293561411733068
369.0	-0.8266545492569574	-0.7896230096546354
370.0	-1.178818434428149	-3.0557586038695943
370.0	1.2129354578534115	2.130752468769612
370.0	-0.0341170234252694	0.9250061350999798
371.0	-3.7897247526147035	-0.2964650590684777
371.0	-4.128681164055329	-1.2288462256403712
371.0	2.442160056124045	-1.4711734347570127
371.0	5.476245860545962	2.9964847194658812
372.0	1.7393675903612844	-6.3929032002529596
372.0	1.2515372232160107	2.460252105847195
372.0	-0.3866281477555861	5.164823657087518
372.0	-1.7355164959798688	4.072710800988522
372.0	-2.019758073698199	1.0335615477230073
372.0	1.1509979038563733	-6.338444911393276
373.0	0.5592317526497925	-2.2553608781917167
373.0	0.9784072156673327	1.5040574785577565
373.0	-1.5376389683171277	0.7513033996339459
374.0	0.8317491668737571	-0.7334605428254275
374.0	0.08509685552338689	0.44869637472772084
374.0	-0.91684602239712	0.2847641680976976
375.0	-1.3341875068957083	1.8385496693332783
375.0	-1.5496368424893705	-6.134200397238546
375.0	2.7876518622484587	-0.027627774208933517
375.0	0.09617248713662024	4.323278502114202
376.0	-1.378638067066353	-1.6273868235715492
376.0	0.428610647494287	-0.6933001499985729
376.0	2.01244421485139	1.9692757039176825
376.0	-1.0624167952793107	0.35141126965242436
377.0	-1.1890047474259786	-0.6635195420365486
377.0	1.766227135819432	-0.13443228739094032
377.0	-0.5772223883934104	0.7979518294274835
378.0	1.021297042092236	-0.5089671069204306
378.0	0.3390965548404199	0.5940933030525989
378.0	-1.2250394646024823	0.7124310789016137
378.0	-0.135354132330197	-0.7975572750338206
379.0	3.0948479141333776	-0.5050961036763525
379.0	-0.7453142397677757	0.9669412540676064
379.0	-1.7959262933356093	0.08554503650149396
379.0	-0.5536073810299685	-0.5473901868927276
380.0	-0.3065477044861467	0.11128821627981073
380.0	0.3322516447022185	-0.28349337787440637
380.0	-0.025703940216068765	0.1722051615945861
381.0	-0.6920331070650749	2.681813904031212
381.0	-1.3344651773667706	2.388201559957681
381.0	0.44925678710485356	-1.5868298994583312
381.0	1.577241497326992	-3.4831855645305616
382.0	0.04623463078086744	0.166239303690669
382.0	0.014026091365236247	0.16398120204366062
382.0	-0.04530923232651978	-0.1630876594914338
382.0	-0.014951489819625258	-0.16713284624288546
383.0	0.9477874656822862	-2.2722190380894354
383.0	-0.004803161678035679	3.353705458801279
383.0	-1.1980713352258179	1.9457286948002346
383.0	0.25508703122155707	-3.0272151155120683
384.0	-12.088668849088462	-0.7120375792939196
384.0	3.56165942841518	-1.6999994886322332
384.0	5.570695484568898	-0.15657670089240858
384.0	2.956313936104384	2.5686137688185657
385.0	-0.9627314026179564	-2.0139811504387404
385.0	1.6490122255940052	1.5124072998815754
385.0	1.4340614500142297	1.7015191082571466
385.0	-2.1203422729902917	-1.1999452576999905
386.0	-1.3633679551670141	1.818082761491017
386.0	-2.1388437720011937	1.0212374870603933
386.0	0.3010590490035994	-2.573907297150261
386.0	3.2011526781646054	-0.265412951401134
387.0	-0.9257556541877491	-2.448299353840171
387.0	0.5508474931474701	-1.051968486692612
387.0	0.20321979378887553	1.7592515677133955
387.0	0.17168836725138267	1.7410162728193828
388.0	0.10980709346497139	-0.7375390666010717
388.0	0.9478541586617897	0.4616579110138058
388.0	-1.057661252126756	0.27588115558727105
389.0	-0.2496682312859656	-0.25611180465190914
389.0	0.42567785587844603	0.08290153412080506
389.0	-0.17600962459248753	0.17321027053110474
390.0	0.8273232907439904	0.06242890880135191
390.0	-1.0968552831637344	0.5059653436450978
390.0	0.2695319924197383	-0.5683942524464455
391.0	1.2088883590501742	2.5643734266614944
391.0	-0.030642841209894564	1.8029029809478252
391.0	-1.1782455178402937	-4.3672764076093165
392.0	-1.342607841263777	-0.0733492346848764
392.0	2.411933126806596	-0.22907734046386594
392.0	0.42510566359773216	0.30174757350379455
392.0	-1.4944309491405505	0.0006790016449463528
393.0	1.5545980460680042	-0.1362318495447932
393.0	0.7092145661383878	2.5320252137469983
393.0	-1.7575440647691427	-0.37868477979825965
393.0	-0.5062685474372248	-2.017108584403962
394.0	-0.3952642989444716	0.13106954381714017
394.0	0.4356059439558377	-0.7149242013443396
394.0	-0.04034164501135983	0.5838546575271848
395.0	0.21754146052896353	-0.2010376620002878
395.0	-0.3198582321035662	0.41997956980023715
395.0	0.10231677157460267	-0.21894190779994935
396.0	0.7778625013381105	0.37478979511467364
396.0	-0.8262536579835196	1.0168026007828883
396.0	-0.7382279073616492	-1.7039446839702466
396.0	0.7866190640070403	0.31235228807266263
397.0	-1.0858301327139643	1.3873749755797884
397.0	-0.28894468390310646	-0.4745249922053
397.0	0.7629843466198211	-0.7282344843647488
397.0	0.6117904699971988	-0.1846154990097686
398.0	1.1974623901848889	0.4121648452664003
398.0	1.4329701526190448	0.7364481611953136
398.0	-1.3173199896430374	-0.5734421554875447
398.0	-1.3131125531608963	-0.5751708509741693
399.0	-0.049589002440679174	-0.04285764777761645
399.0	0.03817300423420547	0.009051035251688466
399.0	0.011415998206465595	0.03380661252594165
400.0	0.2394612256901499	-0.625203663390865
400.0	2.2357279458418704	0.34014771683622563
400.0	-2.4751891715320284	0.28505594655463895
401.0	0.134200742183918	0.048798937108674494
401.0	0.09042422845443732	0.09377825866599775
401.0	-0.22462497063838288	-0.14257719577463676
402.0	-1.1554596337569758	-0.009209954252984702
402.0	1.0771124782458643	-1.250971936495181
402.0	2.0575743275762357	-0.20422513274933676
402.0	-1.979227172065118	1.4644070234975104
403.0	2.7267385333792116	0.7032878144680578
403.0	-1.5105005985698645	1.0656452799000233
403.0	-3.1275835619864307	-0.7847800703858079
403.0	1.9113456271770917	-0.984153023982287
404.0	-0.09812707057884583	-0.22898583987775756
404.0	1.6162862655203334	1.1593471880618418
404.0	-0.6635112278964856	-0.29180927654542244
404.0	-0.8546479670450049	-0.6385520716386639
405.0	9.162479597770853	8.66855204106834
405.0	-8.313526811283856	-4.250559301179152
405.0	-8.404690433044246	-6.9239653982204175
405.0	7.555737646557232	2.505972658331236
406.0	-0.2744794851025615	-0.31599047854728474
406.0	-0.10592774711090927	-0.4788279287565074
406.0	0.4255874463734061	0.10521506463170792
406.0	-0.04518021415995275	0.6896033426720741
407.0	0.9541395875776576	1.6920493702957935
407.0	-2.1494267564391354	1.7730066439247838
407.0	-0.07867669806286985	-1.3948899028840203
407.0	1.273963866924341	-2.0701661113365644
408.0	-0.9820121314373527	-1.895275876341453
408.0	0.9823507553259156	-0.6164466967260885
408.0	-0.0003386238885485898	2.5117225730675434
409.0	-0.06518794289794061	0.24834154523341362
409.0	-0.22585655436244045	-0.09854601474560332
409.0	0.29104449726038656	-0.14979553048780458
410.0	-1.9708433588322136	-0.17494325714714412
410.0	3.8387514703592576	-3.640670362042416
410.0	-0.41059706364983334	1.5739577648230074
410.0	-1.4573110478772175	2.2416558543665537
411.0	-3.39640230449182	-2.7049009271296014
411.0	7.047395133481835	0.8811364796506861
411.0	-3.650992828990025	1.8237644474789592
412.0	-9.526815525640128	-6.3170580084449535
412.0	-6.468976726221784	-9.062982711082455
412.0	11.841733149794921	-2.5213287451545097
412.0	8.549727824173406	7.385329075253979
412.0	-4.395668722106405	10.51604038942793
413.0	-0.002200618988406838	-0.14218950006485637
413.0	0.18888754090487822	0.2395300876238841
413.0	-0.1866869219164572	-0.09734058755897224
414.0	-0.028078583255939166	0.030641839611594137
414.0	-0.020819785101769638	-0.007698198547308324
414.0	0.04889836835773887	-0.022943641064275537
415.0	0.223363798299289	0.3436326759986807
415.0	-0.4638105525673291	0.01745912844319113
415.0	0.2404467542680115	-0.3610918044418781
416.0	0.5753798002055005	-3.5334541635285373
416.0	1.0631835340376259	2.25160115341885
416.0	-1.6385633342431254	1.2818530101096939
417.0	0.05839287998652472	-0.205183592228887
417.0	0.06340376446895711	-0.043066457711364324
417.0	-0.12179664445546572	0.24825004994023692
418.0	-1.3866659197270361	-0.11318448254577512
418.0	1.4321707487895634	-0.36127046460886875
418.0	-0.045504829062533086	0.4744549471546481
419.0	-0.0022245894804948344	-0.012267273588918081
419.0	0.003209892035834421	-0.005156554347924653
419.0	-0.0009853025553394847	0.01742382793684185
420.0	-0.020036101384709747	8.708646350906983
420.0	-3.062723821775383	10.244808377094607
420.0	1.2278795211277689	-9.21917058903116
420.0	1.8548804020322984	-9.734284138970448
421.0	-1.3956971667529767	-0.29089145097394414
421.0	-0.6317849475918005	-0.5997567913681376
421.0	0.8852623614202882	0.28125303992068845
421.0	1.1422197529244915	0.6093952024214108
422.0	0.7546748798750664	-0.32392352705004657
422.0	-0.4628034110234293	1.0982746658078997
422.0	-0.2918714688516371	-0.7743511387578531
423.0	0.06360283272380429	-0.14415791478257226
423.0	0.2571546120985099	0.12044531058531477
423.0	-0.3207574448223206	0.02371260419721781
424.0	-0.0032199633808590224	-0.12191714655078793
424.0	0.0600387517087211	0.10447673296775746
424.0	-0.056818788327861185	0.01744041358303573
425.0	-1.8471641781328814	-0.7543475571995927
425.0	1.8194380790877813	0.20091533381882642
425.0	2.2435285465304275	0.8259625377318025
425.0	-2.2158024474853275	-0.2725303143510362
426.0	0.0896513646936342	0.08749336497569246
426.0	-0.05735222331677153	0.08127597219492486
426.0	-0.032299141376832714	-0.16876933717059822
