# Supplementary material
Source: ML conference proceedings conference paper supplement (https://openaccess.thecvf.com/content/CVPR2021/html/Harel_Crossing_Cuts_Polygonal_CVPR_2021_paper.html)
Supplement: Supplementary file 2 [file Harel_Crossing_Cuts_Polygonal_CVPR_2021_supplemental.zip › Dataset/D4/p5/pieces.csv]

piece	x	y
0.0	0.9889177162214778	0.3975533257693615
0.0	-0.4213407559160381	1.588140015748361
0.0	-0.6872813474335094	-1.045610463330182
0.0	0.11970438712806965	-0.9400828781875331
1.0	-5.810728972045815	0.6800034469331336
1.0	-4.645267442602091	-0.7403821788292931
1.0	5.99959091217408	-0.7639065429450649
1.0	4.456405502473829	0.8242852748412312
2.0	2.7968521610689066	0.6599604922230936
2.0	-3.3521698458918037	1.8678043957410875
2.0	-2.670103406826901	-1.066697873406718
2.0	3.2254210916498134	-1.461067014557448
3.0	3.765960877953736	2.7605981813175466
3.0	-1.9203799238564134	-0.008304485876818243
3.0	-2.3473279701946566	-0.6906630087434648
3.0	0.501747016097343	-2.061630686697275
4.0	-0.9735778578355585	2.7610727094530922
4.0	-2.138675081228961	-3.03334101479968
4.0	2.088344624270836	-2.6229376765461367
4.0	1.0239083147937176	2.89520598189275
5.0	0.0019627129813047667	-1.5351076105964834
5.0	2.781788216285523	-0.16188831311612947
5.0	2.68054638128911	0.8105307960872716
5.0	-2.398698099893122	1.348674577905413
5.0	-3.0655992106628327	-0.4622094502800448
6.0	-3.8074861713362074	-2.6793095479632245
6.0	-3.1220034277140507	-4.304514232733685
6.0	1.2799058431227628	-4.541452419846776
6.0	6.7404836583998735	3.2786751448896307
6.0	2.6320535723773455	5.800415587037595
6.0	-3.722953474849734	2.446185468616468
7.0	1.3278981527789924	0.09291837364770426
7.0	-0.038966536875737	1.7329438402187622
7.0	-1.3961487639935122	2.337705929915147
7.0	0.10721714809024593	-4.163568143781622
8.0	-8.099751315169089	-6.327697180647858
8.0	-10.529293308726364	-9.520823246386849
8.0	6.668064789473976	5.318158778908345
8.0	6.639414543728349	5.444894135214078
8.0	5.321565290693182	5.085467512912264
9.0	-3.4228280617414386	-5.319079307195166
9.0	-3.171245664266053	-5.678936865615586
9.0	5.58288971402049	3.737581231965955
9.0	1.0111840119869822	7.260434940844796
10.0	2.2238726081373485	3.5184715449431434
10.0	-2.996321952362596	0.5236306220416795
10.0	-2.4001907683350523	-0.14093396850646825
10.0	1.5696970374692338	-1.9566861232732575
10.0	1.6029430750910165	-1.9444820752050846
11.0	-2.9697962265934885	0.7226479488455707
11.0	3.530894402939703	-5.844246419082734
11.0	3.794787307685982	2.9730952722111894
11.0	-4.35588548403221	2.14850319802598
12.0	-0.011677381632134226	-0.010558704619476951
12.0	0.01314995316822337	-0.0007878223140874207
12.0	-0.0014725715360681196	0.011346526933545245
13.0	4.389383134989703	6.972214018191138
13.0	-4.023357709515524	0.6008704992110534
13.0	-4.074959508810875	-7.019257355588439
13.0	-1.1301118413821614	-6.2405242425277265
13.0	4.839045924718842	5.686697080714007
14.0	12.871651147191654	-3.5765685968775416
14.0	-7.122970467863508	4.5944938969474745
14.0	-8.254149563840222	4.421666368534559
14.0	-8.382794780176376	4.2449613628903675
14.0	10.888263664688463	-9.684553031494868
15.0	0.29029877332240667	0.020244103983534274
15.0	-0.1965765272877151	0.24989368841021856
15.0	-0.3397377293415527	0.0051031687787571915
15.0	0.24601548330686115	-0.2752409611725325
16.0	-0.11759864128283957	0.2486984176506758
16.0	-0.1791770644096615	0.11724655382345597
16.0	0.2967757056924945	-0.3659449714741345
17.0	1.5239307904099713	0.7139896609672558
17.0	-1.4231161129780008	0.6373972638200235
17.0	-0.10081467743197622	-1.3513869247872985
18.0	-1.8558024154404247	-2.576967503881179
18.0	3.4946250624493405	2.4973173649943154
18.0	2.606800281439687	3.4681834217026264
18.0	-1.8850423033420454	-0.7885931614466695
18.0	-2.3605806251065893	-2.5999401213690967
19.0	-7.542699185132642	6.013962137831908
19.0	-6.463570748984627	-2.5994420250501773
19.0	-2.51437431027339	-7.990297544210295
19.0	-0.5814933896959257	-8.017137122602985
19.0	2.9310862814189367	-5.873734651756489
19.0	8.214401292214916	7.803528711530231
19.0	5.956650060452724	10.66312049425785
20.0	-3.8963841036836153	2.65770650408076
20.0	1.0496950201625568	-9.73781736518576
20.0	4.553300432134468	-5.021928580676891
20.0	-1.706611348613376	12.102039441781868
21.0	1.7525163777985984	0.38810078428592587
21.0	-0.9024471877358191	0.23374099610044385
21.0	-0.8500691900627659	-0.6218417803863547
22.0	-0.42935009392684265	-0.6172879158191673
22.0	0.36564648689929685	0.16777701296935946
22.0	0.06370360702753165	0.44951090284980655
23.0	-0.7345089642053587	-0.04638698839155036
23.0	-0.7750935003157358	-0.2640338495142118
23.0	0.24427226899692941	-0.38250698964183966
23.0	1.2653301955241603	0.6929278275476152
24.0	2.837505716636415	-4.277975000741154
24.0	4.559339836829048	-1.5381315415600643
24.0	4.223153694503109	1.6176454091409933
24.0	-0.9016139195306374	7.024198911166146
24.0	-3.2422528907516996	6.623402731257199
24.0	-3.8679603308361963	-4.130255454537807
24.0	-3.6081721068500285	-5.318885054725324
25.0	-2.631050940391746	3.451641467591514
25.0	-1.57448540896288	-3.227669595260774
25.0	2.547830858785296	-2.958422030611054
25.0	3.0879404440588853	-0.9250017409810387
25.0	-1.4302349534895598	3.6594518992613327
26.0	2.885256114632227	0.36924995007464895
26.0	0.34460326807680786	1.8682226727921314
26.0	-0.7243632060006785	1.5880610727118902
26.0	-2.4099612819574574	-1.7312433919044528
26.0	-0.09553489475086616	-2.0942903036741907
27.0	-9.71680207866557	-5.6765732654520535
27.0	6.634279079876228	2.4567392503410344
27.0	6.544807556440085	3.735792363280774
27.0	5.706043626890375	3.4479147827178314
27.0	-9.168328184541098	-3.9638731308876283
28.0	-3.038413624702709	4.400558761899501
28.0	-1.5446510009866068	-0.9345245863506147
28.0	1.7701761500949402	-2.893066186227023
28.0	1.8456309466571812	-2.800405503256851
28.0	0.967257528937193	2.2274375139350107
29.0	-0.19322849597980418	0.03014167031185157
29.0	0.10110699008576522	-0.0727224386776685
29.0	0.0921215058940335	0.042580768365797585
30.0	2.772887161753656	2.245390939133421
30.0	-6.001218452741502	2.330665589236022
30.0	3.228331290987835	-4.576056528369453
31.0	0.05692608204669059	-0.07650230360821744
31.0	0.32855342827018597	0.18013251330613464
31.0	-0.3854795103168765	-0.1036302096979172
32.0	0.8270470377311506	2.9587602363243946
32.0	-1.3803193733840629	2.833440454152181
32.0	-2.8833533550700565	-3.8430977500399397
32.0	1.283002252550242	-3.250690755117213
32.0	2.1536234381726915	1.3015878146805793
33.0	5.426135067796416	-2.2750513365292973
33.0	5.089213177078315	0.35388569817213833
33.0	-2.256869028942657	4.093603484500608
33.0	-4.11192898861987	3.742617840039453
33.0	-4.146550227312201	-5.915055686182917
34.0	6.8496056417271065	4.9417550298865605
34.0	6.1313507840848525	5.3499088167071385
34.0	0.48533349822923394	2.3198050376629324
34.0	-6.989066929046632	-3.0195492089743188
34.0	-7.170518794997792	-4.755321794495714
34.0	0.6932958000032784	-4.836597880786561
35.0	-3.998027411988701	-2.542107732648164
35.0	4.365572291298101	-1.2809718786040476
35.0	-0.3675448793093872	3.823079611252207
36.0	0.04205426556601968	0.6457807851199616
36.0	-0.5108410481009491	-0.7983006780261274
36.0	0.46878678253492667	0.1525198929061724
37.0	-2.2364307945237107	0.7253180481375674
37.0	1.9072216953121286	-1.3311123866673442
37.0	2.0723459298650164	-0.9763744271695391
37.0	-1.7431368306534272	1.5821687656993302
38.0	-2.0582251107846092	3.7250697314356587
38.0	-5.355313929242212	-0.430972575685297
38.0	-1.3501918116216873	-4.479787580510522
38.0	4.55665336887688	-3.7993735742609025
38.0	3.9236960943535903	-0.9358663527976887
38.0	0.7921684650147522	2.423674737764493
38.0	-0.508787076596745	3.497255614054281
39.0	3.3994832868452294	-0.1944177507089555
39.0	3.5987749469089194	0.8260158034415305
39.0	-2.5002538322080996	0.22123051055356627
39.0	-4.498004401546052	-0.8528285632861514
40.0	0.08202334937785924	-0.033840701959403974
40.0	0.1533232641260861	0.0603549746032625
40.0	-0.23534661350396643	-0.02651427264385566
41.0	-6.217631792843465	-1.8821829574306026
41.0	1.3272169505202474	-6.142027874503238
41.0	7.450878583944235	3.6556035926769663
41.0	4.482625149410117	3.676380881481356
41.0	-7.043088891031152	0.6922263577754775
42.0	0.20409271316505756	-0.25400388525800977
42.0	0.23177740693688637	0.32026641580922616
42.0	-0.3125327406642503	0.14188433194429959
42.0	-0.12333737943769071	-0.2081468624955234
43.0	14.241363573712503	-0.7733705403216077
43.0	14.167133493693935	-0.49917953591494046
43.0	-15.18641902573139	3.843391109457445
43.0	-14.891463861435573	3.5122725310747187
43.0	1.6693858197605134	-6.08311356429562
44.0	9.773115437121916	1.3349704791713533
44.0	-4.954642309516505	5.300429655944859
44.0	-6.799073792824353	-2.901654662493118
44.0	-6.6377823120195005	-3.376454916085808
44.0	8.618382977238436	-0.3572905565372798
45.0	1.3152684526059484	0.47980865680967294
45.0	0.7107722612829236	1.146899102731468
45.0	-0.6836854937661687	0.21920526912330784
45.0	-1.342355220122709	-1.845913028664462
46.0	-4.728502893660635	2.610558966279663
46.0	-0.544152032767669	-3.7347793346614075
46.0	5.272654926428305	1.1242203683817515
47.0	-1.062018223952159	0.5950692194915884
47.0	0.04817153430245053	-1.5220986749727188
47.0	1.0138466896497043	0.9270294554811372
48.0	2.2656295845751706	-13.204261980370829
48.0	7.304068012721982	-7.438549861156182
48.0	-2.358973897305902	15.806211404770758
48.0	-5.689745728443683	13.605130093624892
48.0	-1.5209779715474838	-8.768529656868616
49.0	3.7325837924699705	2.1590615636161727
49.0	1.6067699320454902	2.1288333211426456
49.0	-2.5892977430919255	-1.2374517791182307
49.0	-2.7500559814235195	-3.0504431056405874
50.0	-0.2622343352216603	-0.3377395700623185
50.0	2.390644716002511	-1.1135158702887766
50.0	-0.447270403053389	0.8310178318273196
50.0	-1.6811399777274605	0.6202376085237757
51.0	0.46833880260944577	-0.8748334628241913
51.0	1.7171637051420343	0.02997443447001264
51.0	1.4419592099656382	0.35382877570645593
51.0	-1.4276126752449079	1.5402593618000064
51.0	-2.1998490424721666	-1.0492291091522712
52.0	0.7814265258982928	5.881225954168339
52.0	-2.023341830489422	-5.491582549769098
52.0	0.3179970144699197	-6.3148136962636485
52.0	0.9239182901212153	5.925170291864421
53.0	-0.6766574913917567	-2.833786440963956
53.0	1.8205484382833081	-1.987955904368551
53.0	1.7667896378400676	3.7886505726429354
53.0	0.44026575762958237	3.8987482064054353
53.0	-1.939462755964881	-0.4804966752129044
53.0	-1.4114835863963633	-2.385159758502956
54.0	-4.206235163509872	-1.282053363006621
54.0	-3.1559247157001997	-1.6810099613372178
54.0	7.3028714943426305	-1.6878339801814755
54.0	3.1738661349013806	2.6607294917286293
54.0	-3.114577750033956	1.9901678127966966
55.0	1.1041123862648612	-1.212011808502517
55.0	-0.37492205087250585	1.581533325258514
55.0	-0.7291903353923793	-0.3695215167559817
56.0	3.8337381196114246	0.8060910451369226
56.0	2.0421552969824894	3.0481888269216926
56.0	-5.875893416593913	-3.8542798720586084
57.0	-0.7468222632827294	0.8750468032806208
57.0	0.5201644064317544	-1.5541041759038812
57.0	0.22665785685097556	0.6790573726232622
58.0	0.2747899204181575	2.640632198967145
58.0	-2.336523670865256	-1.2453381082146755
58.0	2.0617337504471034	-1.3952940907524642
59.0	4.094169145547319	1.3619737365923963
59.0	0.12468581440472924	2.042807363840545
59.0	-0.8195558257104343	1.366977323624595
59.0	-1.7412992854130422	-2.3365059482201302
59.0	-1.6579998488285865	-2.435252475837484
60.0	-1.2326536813978257	1.6781805542265273
60.0	-2.166512646939449	1.4487702081052236
60.0	-1.4370507813408513	-1.7607121175148512
60.0	2.026381263882193	-1.049066082674533
60.0	2.809835845795973	-0.31717256214237194
61.0	-2.683303521178491	5.779856339571521
61.0	-3.2106898345918307	4.548053721257587
61.0	-2.7218384194063887	-3.0878311374484952
61.0	2.594185216377938	-5.11752055174391
61.0	6.021646558798761	-2.1225583716367136
62.0	3.78656805780193	4.182863320330496
62.0	-4.042208456472316	10.832879453820581
62.0	-3.130974054077267	-6.464799649240707
62.0	3.3866144527476467	-8.55094312491039
63.0	-0.656064426029206	1.6172499375292577
63.0	-0.5823288081122026	-0.8711447200402331
63.0	1.2383932341414086	-0.7461052174890245
64.0	-1.2340751648473232	0.2686271658405644
64.0	0.9961145938061435	-2.424898358089309
64.0	1.286093699403424	0.5189381312861822
64.0	-1.0481331283622572	1.6373330609625687
65.0	-2.1498921395123434	-5.73078911380415
65.0	3.1739799394426207	-2.3102415201082835
65.0	2.3571118429363964	4.533338879547518
65.0	1.9564151371672869	5.141505014088434
65.0	-5.337614780033956	-1.6338132597235104
66.0	-4.042340148804986	4.922918419037256
66.0	-0.7934449117817345	-5.783928358853106
66.0	0.6494754804542285	-5.720684847384075
66.0	3.2632975343470982	0.34678609460070786
66.0	0.9230120457853894	6.234908692599202
67.0	1.671672855623869	0.935604146825312
67.0	0.3479443785920397	1.565537812576137
67.0	-1.183228724156675	-1.1768591341422423
67.0	-0.836388510059241	-1.324282825259164
68.0	0.09239105422741233	3.002324519929377
68.0	-4.028223126082036	-1.809433805728447
68.0	3.935832071854645	-1.1928907142009066
69.0	-1.7886010740059748	1.240995851773657
69.0	-3.686227523104004	-0.6077012483221318
69.0	2.914281339470551	-0.6959996749698645
69.0	2.560547257639422	0.06270507151832604
70.0	0.2557314653498797	0.15718934709006843
70.0	-0.30444420140944806	0.31067388976453264
70.0	0.048712736059590485	-0.4678632368546189
71.0	-3.608226191843764	-0.809328466877461
71.0	-0.2619084635028851	-5.120070500224645
71.0	3.8639122266639867	1.428865616762726
71.0	0.0062224286826620305	4.5005333503393805
72.0	2.6425277901410813	4.435732476116735
72.0	-3.070797381417234	1.8650326174821052
72.0	-1.2351850181486719	-3.6235642183649253
72.0	1.6634546094248293	-2.6772008752339094
73.0	-2.034575821647941	-1.6331275701392514
73.0	2.9093439222523836	-4.9481003779198875
73.0	1.8025722771918187	0.7524522875361208
73.0	0.01718010749600127	2.82722802007901
73.0	-0.6257033786874393	2.541857206393243
73.0	-2.068817106604835	0.4596904340507811
74.0	-1.0505593208712103	2.0087759508088494
74.0	-3.5176336973425033	0.3807123542256802
74.0	-3.5841633658433554	-0.20449236832088505
74.0	8.152356384057075	-2.1849959367136322
75.0	-0.8277773313576761	-0.5641526649842907
75.0	0.3723227230001186	-0.32398154024755
75.0	0.827891600434931	0.10589327541433895
75.0	-0.3724369920773849	0.7822409298174932
76.0	0.9765857008583277	-0.6981383888489517
76.0	-0.30274809081427606	0.32622633087106656
76.0	-0.6738376100440515	0.3719120579778851
77.0	3.07817900902277	0.17810699596992488
77.0	-2.2960866996815206	2.819810279635339
77.0	-2.8090541029753	-0.5527100125798513
77.0	2.026961793634022	-2.4452072630254067
78.0	-0.27120459545531256	0.3148987716704062
78.0	-0.2502462157264192	-0.6394317772949284
78.0	0.5214508111817318	0.3245330056245222
79.0	-5.000239063217657	1.9123461779147253
79.0	-5.010499473053292	1.8864122063899933
79.0	4.874662415559133	-10.169613857363753
79.0	2.731047888590576	2.729367995521084
79.0	2.405028232121274	3.6414874775379142
80.0	11.057684304222681	4.2888092302630065
80.0	-13.321103778815475	-0.136673374670064
80.0	-12.395979311243035	-1.9074409925473648
80.0	-8.860466590201389	-4.482996988438273
80.0	10.242575076023398	-1.6607454262829193
80.0	13.277290300013842	3.899047551675637
81.0	3.962260769729603	1.437766171442671
81.0	-0.985893175630075	4.879505890650296
81.0	-2.2316424302977644	4.804784251724901
81.0	-4.494033154433101	-7.872612125430426
81.0	3.749307990631337	-3.249444188387435
82.0	1.5238383331769276	-3.549061978744253
82.0	1.8078465167900268	2.575672959686085
82.0	-0.6818409365352015	3.636089080986564
82.0	-2.34876462419354	0.6087916919441196
82.0	-0.30107928923822697	-3.271491753872539
83.0	1.0100657830445359	-2.6681598158554243
83.0	0.8358383088827034	1.6037358432117028
83.0	-1.8459040919272387	1.06442397264375
84.0	2.2586923144925386	-0.36385502380190426
84.0	0.8495514076359731	2.71119789088937
84.0	-2.814985766412746	-0.3493620512576898
84.0	-0.2932579557158086	-1.9979808158297752
85.0	-1.1014805993332173	1.358568273893034
85.0	-0.002296864020845832	-1.101148940514478
85.0	1.103777463354049	-0.2574193333785566
86.0	-2.8928168472089526	1.0631588574075972
86.0	-3.161236575400752	0.36474999385555223
86.0	-3.1852015154760043	0.21344022370909077
86.0	5.321981618564088	-3.899823594393976
86.0	3.9172733195216134	2.2584745194217573
87.0	0.8055404090619528	1.5546179952146404
87.0	-2.1540618067950335	-0.08602924565838117
87.0	-1.5815387837007837	-0.8453410399940312
87.0	2.9300601814338703	-0.6232477095621993
88.0	0.47904492117683833	0.8537216393208558
88.0	-0.8324885930691031	-0.8081162618418096
88.0	-0.1602465504047145	-0.7830137298693757
88.0	0.5136902222969743	0.7374083523903245
89.0	0.014254423873308626	-0.04758101725754835
89.0	-0.0019117607086804947	0.05220384831094438
89.0	-0.01234266316462035	-0.004622831053407927
90.0	-1.1932117062341872	-4.146665845005582
90.0	3.7861554276015115	3.1995589139302414
90.0	-2.592943721367296	0.9471069310753395
91.0	-0.2400151928354797	-0.5214924726689253
91.0	1.0921116956280779	-0.06456572422660617
91.0	-0.11524489144532132	0.5897648431007249
91.0	-0.7368516113472569	-0.0037066462051939136
92.0	-1.7689630041704962	2.663870582719492
92.0	-2.7013080215039773	0.06271818230012913
92.0	2.2024143818613373	-1.6473775616190258
92.0	2.267856643813139	-1.0792112034006236
93.0	1.3781862629451607	4.720968972868231
93.0	-1.7511994626559444	-0.5431199919158717
93.0	-0.06743258655391644	-2.371715517619427
93.0	0.44044578626472697	-1.8061334633329211
94.0	-0.058132765598050716	0.346101645167516
94.0	-0.5184686184799436	0.1381489895685908
94.0	-0.0012698424905516483	-0.29225731359393525
94.0	0.5778712265685483	-0.19199332114220705
95.0	2.5328092449682957	-2.6700813022435668
95.0	-0.6651418826817912	5.634269833344158
95.0	-1.8676673622865083	-2.964188531100617
96.0	2.3749448706248213	-1.3743098537541276
96.0	-4.247511271837261	8.941044923799028
96.0	1.872566401212425	-7.566735070044926
97.0	2.9828198003570257	-2.410252692148263
97.0	0.7519910498177151	1.7355205042541504
97.0	-2.625258942603366	1.3902291761040004
97.0	-1.109551907571362	-0.7154969882098944
98.0	6.527751750846888	1.0426838965431875
98.0	2.4377636483174214	3.297494794657447
98.0	-3.739398024818966	-0.33910170879236634
98.0	-3.0916232242077206	-1.8370298161656586
98.0	-2.1344941501376495	-2.1640471662426335
99.0	2.4771326663840183	-0.230526047853982
99.0	-1.804056076466589	5.203674044808818
99.0	-3.2161233064367947	-4.199416352659713
99.0	2.5430467165193607	-0.7737316442951176
100.0	0.56259458824708	-0.28388206719165787
100.0	-0.4166170915730987	1.197264937459159
100.0	-0.14597749667395035	-0.9133828702675187
101.0	1.1784218136651214	1.1914731559899945
101.0	0.8020806319238998	1.8238819407070377
101.0	-1.6970570394588393	-1.95762360840418
101.0	-0.283445406130168	-1.0577314882928495
102.0	2.9972617872321368	0.18096163068514104
102.0	-1.022377915181876	4.901862911955162
102.0	-8.213930031877089	-1.1311821169553782
102.0	0.22889486408782003	-2.084844888211408
102.0	2.7974487696230925	-1.1819127206462967
102.0	3.212702526115916	-0.6848848168272283
103.0	-5.902088051569403	-0.6583515086176749
103.0	-4.393666015698328	-2.723620016160597
103.0	10.253239057961437	0.5432662719450357
103.0	0.04251500930628742	2.8387052528332632
104.0	-10.932537097445529	12.456101834379236
104.0	-1.1789081365695038	-10.317443283127878
104.0	0.6036224623460505	-10.236597384401634
104.0	11.507822771668986	8.097938833150272
105.0	-0.8301542198053184	4.619203374268565
105.0	-1.0553715736246707	-0.9503517045165557
105.0	-0.3029273527204746	-3.6441979536271143
105.0	2.2814814236671754	-3.74561377618675
105.0	-0.09302827751667153	3.7209600600617954
106.0	-0.7912111399898889	3.0121869648410535
106.0	-1.067411450894402	1.9607560074407173
106.0	0.5638758753853509	-2.450211714904106
106.0	1.2947467154989365	-2.5227312573776475
107.0	3.5027838091137338	1.5163077502945885
107.0	2.293368787472045	4.989069191038269
107.0	-0.6981374026633188	6.537116441780301
107.0	-4.3385637403197235	-0.7972431116301603
107.0	-5.009960578428176	-3.6729119421715946
107.0	4.250509124825453	-8.572338329311433
108.0	-1.6749323534720173	-1.3236064573905417
108.0	1.1480705994158245	0.12629521178495343
108.0	0.5268617540561996	1.1973112456055863
109.0	-3.301002021976093	-2.666406719631963
109.0	2.3039367477944013	-3.073854227080051
109.0	3.8873166427830346	6.334764583462171
109.0	-2.8902513686013243	-0.594503636750164
110.0	-0.25049294334063155	-0.15255650280220912
110.0	0.37507286305492227	-4.604035524948352e-05
110.0	-0.12457991971427694	0.1526025431574635
111.0	-0.6741720407100968	1.5649142145457897
111.0	-1.1941949880762581	0.9289143138392012
111.0	-0.822745137751366	-2.542416889938737
111.0	1.3472779453060366	-0.0736030246119816
111.0	1.3438342212316796	0.12219138616570857
112.0	-0.5841275042734952	-2.9160754196029752
112.0	3.6026727619837966	-3.688420756005969
112.0	5.614959103641758	-2.7447418224272235
112.0	5.811617719934064	-2.5263454818252553
112.0	-6.451523839596829	8.569662105001674
112.0	-7.993598241689242	3.3059213748597713
113.0	2.535824868594619	10.355068730745725
113.0	-6.493580448859032	-4.423978999903108
113.0	-5.787837412695	-7.004730540851498
113.0	9.745592992959427	1.0736408100088788
114.0	0.9121009263982417	2.1756977916302116
114.0	-1.060513765228188	0.7071830557163616
114.0	-2.141466468683394	-3.5958772753802286
114.0	2.289879307513344	0.7129964280336235
115.0	3.92427941700742	-0.5813156263465385
115.0	-3.985147421269804	1.2050028539635715
115.0	-4.585021195616393	0.7658424601085333
115.0	4.645889199878768	-1.3895296877255383
116.0	0.3324559226733276	1.360842693726474
116.0	-1.3516999624242656	-1.0059471175276897
116.0	1.0192440397509286	-0.35489557619879486
117.0	-2.818132213345322	1.840542964572696
117.0	-0.041276346826047285	-3.833617863138129
117.0	2.8594085601713757	1.993074898565437
118.0	-6.458280305024867	0.4429704121253525
118.0	6.373855476409936	-1.5448049859140063
118.0	6.114094866989056	-0.2890546826958346
118.0	-6.029670038374124	1.3908892564844917
119.0	0.19228818151492846	5.336308977148942
119.0	-0.9631352437218913	3.827136692177993
119.0	-0.2155256968529479	-5.114500401959254
119.0	0.9863727590598883	-4.048945267367698
120.0	-0.9193882107283867	-1.5590868299475638
120.0	-0.12453722720720918	-1.0189875466266605
120.0	1.043925437935608	2.57807437657424
121.0	0.5012484309268003	-2.2048883204115057
121.0	0.844253024755875	2.1585149755475532
121.0	-0.7384388579227527	1.2909122606242156
121.0	-0.6070625977599795	-1.244538915760278
122.0	-0.07194965422053069	0.5857854117359299
122.0	-0.33914201870571936	-0.1884952089438936
122.0	0.41109167292623	-0.3972902027920384
123.0	-0.6089614092831969	0.26798203527695597
123.0	0.4988405785387263	-0.6362745646405524
123.0	0.6858467671828867	-0.007730044031104879
123.0	-0.5757259364383975	0.3760225733947189
124.0	0.7918953842163102	-2.476944638821311
124.0	1.3922636403583795	1.5795802508129306
124.0	-2.1841590245746922	0.8973643880083958
125.0	-0.214263608388311	0.527880380767759
125.0	-1.0280275483001264	0.5878727531715165
125.0	0.3024336707035156	-0.37350424692527284
125.0	0.9398574859849231	-0.7422488870139885
126.0	0.7017460637674535	0.7371404695762471
126.0	-1.7116542932301755	0.49626753210449237
126.0	1.0099082294627209	-1.233408001680738
127.0	2.844870546912425	2.4274771511324684
127.0	-0.4162357590396386	4.377072838694201
127.0	-2.174970884838322	3.2645838359967394
127.0	-4.501409223244503	-3.145690441233887
127.0	4.247745320210045	-6.923443384589525
128.0	4.79380531424758	-3.5594925546854568
128.0	-1.6351143878770094	4.577146775112384
128.0	-2.8477072663629497	3.5487799959332214
128.0	-4.810782895675385	-0.5099351184152816
128.0	4.499799235667762	-4.056499097944865
129.0	-4.126095923382706	-0.32203023159955757
129.0	-1.6225425213721107	-2.6374808365752616
129.0	4.423276812817318	0.8168726881158529
129.0	4.500333660859954	1.8083256382829125
129.0	-3.174972028922462	0.3343127417759585
130.0	-0.04426122299630526	-0.09444128545667947
130.0	0.12280754632996525	0.09351538435227279
130.0	-0.07854632333370241	0.0009259011044012092
131.0	0.9712547184338641	0.3949566506977213
131.0	-1.035645321127752	0.10248948987959432
131.0	0.0643906026938888	-0.4974461405773298
132.0	0.4933735624088189	-1.1892873317324315
132.0	0.4020697235877299	0.7731180560180648
132.0	-0.26077331921659946	0.7363943348344947
132.0	-0.6346699667799459	-0.3202250591201342
133.0	1.8708863993197806	2.143707169890581
133.0	-0.09690896091848522	1.3371193809786033
133.0	-0.9100114655313026	-0.08570954576318206
133.0	-0.8532432540056835	-2.250492039268663
133.0	-0.010722718864282521	-1.1446249658373624
134.0	-2.0527327270724114	2.6777949425152086
134.0	-4.08308233067338	-1.3082593698120697
134.0	1.3468305669463423	-2.9323228718900274
134.0	2.4214305739584883	0.05315667631781666
134.0	2.36755391684098	1.5096306228690823
135.0	-0.9211104105040588	-0.3489119766684648
135.0	1.16873716127723	-0.30977331607572206
135.0	-0.24762675077316512	0.6586852927442003
136.0	7.852674893647116	-1.151438274767027
136.0	9.791441852588255	-0.624451155484265
136.0	10.188475952710531	0.28361728987175266
136.0	-5.8813655712224175	1.7071099422591076
136.0	-6.6392398165477795	1.5283372129157535
136.0	-6.731630572239866	1.4648052571447785
136.0	-7.432020007783388	0.30683162094309024
136.0	-1.1483367311524866	-3.514811892883252
137.0	2.0960381370778216	-0.06513015702443571
137.0	-0.018239576129330713	1.4229417424179551
137.0	-1.0331692594747874	0.0316373683735345
137.0	-1.0446293014737054	-1.3894489537670645
138.0	-0.28255396955550094	0.44514476336110187
138.0	-0.6347315667623881	-0.2755108418288604
138.0	0.9172855363178883	-0.16963392153226994
139.0	-0.06811220312457794	-0.1744196910340917
139.0	-0.02331097031957752	-0.13548082784040003
139.0	0.14503767578260773	0.19763227394326785
139.0	-0.05361450233845147	0.11226824493123808
140.0	-0.7721245440901696	1.2538826640603586
140.0	-1.1278281183542231	-0.37730054025920934
140.0	1.3075094697766143	-1.4833229657903912
140.0	0.5924431926677884	0.6067408419892416
141.0	-7.240065588997441	-3.4647726532474494
141.0	-2.340030323233761	-6.970482320369393
141.0	-1.0057684643542597	-6.5351119030995255
141.0	6.238338564169444	-0.06888849349675731
141.0	6.180283192619286	1.1657665843500664
141.0	0.27917674676898335	7.545213038955431
141.0	-2.111934126972292	8.328275746907645
142.0	-0.4106070996649808	-0.46210473830155685
142.0	0.5701233689320039	0.14396466652504533
142.0	-0.15951626926702311	0.3181400717765115
143.0	2.573592681765641	-2.614443229136657
143.0	-0.44746163567153774	4.593062238132279
143.0	-2.126131046094102	-1.9786190089956233
144.0	0.7326065144157302	-0.03439378784551828
144.0	0.49400926630847475	0.3808893899478008
144.0	-0.5698489805199556	0.07416501695841632
144.0	-0.6567668002042335	-0.4206606190607
145.0	2.2665691656220543	2.3512376992592907
145.0	-1.5600809724370008	2.961835119802721
145.0	-4.991538770441892	-2.282999353570983
145.0	-0.3652817666047402	-3.156173678974916
145.0	2.1914128180047068	-1.767341563866471
145.0	2.4589195258568504	1.8934417773503727
146.0	-0.23211295766778411	-5.491401565706738
146.0	2.054743833220784	2.6880993530407955
146.0	0.8534852201907525	5.362090104352328
146.0	-0.8276171542557595	4.017077398890659
146.0	-1.848498941487993	-6.5758652905770445
147.0	0.2274561004358835	-0.8885666078146206
147.0	0.8240284949937515	-0.9226357740832752
147.0	-0.28100200642994977	0.9415248598853179
147.0	-0.7704825889996908	0.8696775220125914
148.0	-0.9683413723624598	3.163776740351805
148.0	-1.656821406747057	1.2631870193673451
148.0	2.625162779109525	-4.426963759719138
149.0	4.31162794936667	5.16671099090232
149.0	1.7248909739138065	4.202804028186069
149.0	-3.1273453939507934	-3.2311011329911454
149.0	-3.093028068876163	-3.3407099299793597
149.0	0.1838545395465071	-2.7977039561178922
150.0	-1.989794258446649	3.4558970409383942
150.0	-2.6737613408636145	2.281210493309385
150.0	1.6889275419666894	-5.3019683709576535
150.0	2.0916033878353595	-5.2226685781905156
150.0	0.9775406397154063	1.6584604487090162
150.0	-0.09451597020718791	3.12906896619138
151.0	0.5351891116427383	0.27278039829193274
151.0	-0.27602854571356344	-0.07801577730204268
151.0	-0.25916056592917885	-0.19476462098987032
152.0	-0.1286716706745514	0.5374360631328358
152.0	-0.4764576383345622	-0.6551913130118585
152.0	0.6051293090091074	0.11775524987902634
153.0	0.2615021129790027	-0.8559473757175715
153.0	0.2936113268651705	-0.8370008673138442
153.0	0.9170630239869593	0.9767268238414974
153.0	-1.4721764638311186	0.7162214191899197
154.0	0.4660789067742181	-0.11898510507554591
154.0	-0.13216753400420916	0.25868050223489253
154.0	-0.3339113727700035	-0.1396953971593512
155.0	-0.9619128670068551	3.8124611304680283
155.0	-1.1210129519303205	-3.2671676262345617
155.0	1.1220635864358248	-5.724120531788818
155.0	0.9608622325013263	5.178827027555337
156.0	2.7231823497931256	2.017088917251505
156.0	-5.179753128394559	-2.6541212181201224
156.0	2.4565707786014306	0.637032300868603
157.0	-0.4798274210991773	-1.3073874115478215
157.0	-0.47149310067062605	-1.3172662215948008
157.0	0.5042534652992609	1.346535946332698
157.0	0.4470670564705548	1.278117686809914
158.0	-0.04396284771797213	0.2835184522651146
158.0	-1.1037545240621813	-0.18063873247341927
158.0	1.1477173717801674	-0.10287971979174469
159.0	-5.662701574564484	8.272542850170039
159.0	-4.330494464455014	-7.612486120243737
159.0	2.573745293326516	-8.131623315624902
159.0	6.05778300666989	-2.62265655482719
159.0	1.3616677390231047	10.09422314052581
160.0	-0.023548241794338294	0.2993057568119034
160.0	-0.28762384227795185	-0.24442262831133232
160.0	0.3111720840722696	-0.05488312850059074
161.0	-0.277784796343181	-0.4983500844213921
161.0	0.4257367335979513	-0.5818130331292289
161.0	-0.14795193725477412	1.0801631175506199
162.0	-3.933145809893269	0.345979119541667
162.0	1.1995907331877234	-2.1628748560151605
162.0	1.298385731810887	-2.0666024510025003
162.0	1.4351693448946647	3.8834981874759884
163.0	4.835224000275792	-7.831402514147083
163.0	11.831629582238525	8.227973324200144
163.0	-0.5777348810254687	11.619192996792115
163.0	-8.054543630669992	-5.965409462341188
163.0	-8.034575070818898	-6.050354344503978
164.0	-0.05940647676812807	-3.6296551330971494
164.0	0.6503307768277077	-3.6664159260235327
164.0	0.7863454841866212	3.313247281246192
164.0	0.39242348727732856	3.5307506534838624
164.0	-1.769693271523531	0.45207312439061903
165.0	1.170468085527661	-0.9935607257014566
165.0	0.6445555508209316	0.49975512956548995
165.0	-0.7537792538724081	0.7632926197487561
165.0	-0.803366830013872	0.6413658114166723
165.0	-0.2578775524623225	-0.9108528350294919
166.0	-2.672223309123655	-4.656115533557316
166.0	-1.925998975188515	-4.542564529875091
166.0	4.113816103694146	3.8067499516690257
166.0	3.64145810777746	4.077252490182737
166.0	-3.1570519271594057	1.314677621580614
167.0	-2.125767603869307	-1.2595121587542624
167.0	0.996881317029962	-0.38920712305791816
167.0	1.1288862868393452	1.6487192818121803
168.0	-1.3918745774844414	-3.5807086102807553
168.0	-0.35508203018620044	-3.9480284306656803
168.0	1.1051615389069118	-2.1594016540268783
168.0	0.4860189702494525	4.8511420662774745
168.0	0.15577609851427504	4.836996628695823
169.0	-4.287127002526157	2.2388423044134567
169.0	-0.6872441717200454	-3.2064976475437277
169.0	4.974371174246194	0.9676553431302677
170.0	0.7538689022006083	0.5590707891175166
170.0	-0.3200292319763871	0.7938805539335958
170.0	-0.4338396702242241	-1.3529513430511144
171.0	-0.38689437174796437	-1.5033507241991972
171.0	0.332401755671074	-0.8233133597892747
171.0	0.7691751962248844	1.447308680637859
171.0	-0.09431695543510106	1.232400132766125
171.0	-0.6203656247128598	-0.3530447294155314
172.0	-1.0013568640664403	5.051723347860795
172.0	-0.2585247512649046	-5.83601897778711
172.0	-0.014973754422914303	-6.07632926194237
172.0	1.2748553697542353	6.860624891868669
173.0	2.0558898961445933	1.3547943772026736
173.0	-0.934574626416885	0.2785487646033469
173.0	-1.121315269727753	-1.6333431418060214
174.0	-4.820710944850814	1.4262061077465937
174.0	-1.4212267210262512	-3.9081841500548276
174.0	3.927991360015455	0.23032960178991627
174.0	2.313946305861606	2.2516484405183084
175.0	5.024299834246926	-4.321494187720248
175.0	6.905230789768739	2.657592214478771
175.0	-4.2788513843539775	2.7756924313510503
175.0	-4.398585724392531	0.2861009854074319
175.0	-3.2520935152691552	-1.3978914435169636
176.0	-2.573040542847227	-4.574556208419301
176.0	4.38474442476392	5.53173305642117
176.0	1.9588138305327858	4.736436138781356
176.0	-3.7705177124495073	-5.693612986783225
177.0	0.06760984054268328	0.04418771241213937
177.0	-0.05913480416954686	0.021364549267838432
177.0	-0.008475036373140529	-0.06555226167996245
178.0	-1.0235338028744345	8.302105003358548
178.0	-3.150471029987437	7.951064323067798
178.0	-3.114434844039341	-11.417323260960623
178.0	2.5467167539840228	-11.105464477176028
178.0	4.741722922917185	6.269618411710298
179.0	-1.1850146535136423	-0.4170591272524885
179.0	1.3214916543438258	-0.12133214674845838
179.0	-0.13647700083019085	0.5383912740009591
180.0	-2.1873739420764147	-7.777738391235611
180.0	0.64604446632048	-6.521994689013725
180.0	4.280111615273236	6.742941832713591
180.0	3.7289190235775114	7.700208240701726
180.0	-6.467701163094814	-0.1434169931659786
181.0	3.2648587803400284	-3.057334009792385
181.0	4.026358759454496	3.1857339462996683
181.0	1.7809794392814875	11.923638804942454
181.0	-5.16738295492144	-5.8740229771677175
181.0	-3.904814024154598	-6.178015764282009
182.0	-3.9820142674902717	-7.127855762624233
182.0	5.231859275175071	4.153032164957276
182.0	2.150230810445279	4.92035026568855
182.0	1.0907919869641705	4.742363033834277
182.0	-4.490867805094298	-6.687889701855828
183.0	3.8783161402861364	-3.600211644254227
183.0	5.004605822504205	-2.8446588786417766
183.0	-2.5393627952103017	4.087869593623132
183.0	-4.632900958538515	3.048273388198551
183.0	-4.634569912685426	3.0178165137284703
183.0	2.9239117036438813	-3.709088972654159
184.0	-12.411044255699688	-0.6314038152050029
184.0	-12.320730319138406	-0.6580341857553849
184.0	12.401245875669423	0.5456523296008563
184.0	12.33052869916868	0.7437856713595421
185.0	-0.07984509605125657	-0.23960713445767076
185.0	0.5084015732300415	0.19471978719596578
185.0	-0.4285564771787708	0.04488734726170869
186.0	-0.5345228080719684	-0.7598285553829943
186.0	1.200697307192173	0.06459998314584509
186.0	-0.6661744991202062	0.6952285722371634
187.0	2.1450732282851392	-0.35298535893727484
187.0	3.301989150192673	1.106526085291759
187.0	-2.188855062022765	0.3483473768880052
187.0	-3.2582073164550387	-1.1018881032425012
188.0	4.16141437414798	-18.370577722541043
188.0	6.491854855288129	11.261044916901328
188.0	5.740420504177344	14.008425203502476
188.0	-1.7954317699426385	17.244529176483695
188.0	-3.9744630996185952	13.581671795989596
188.0	-7.527268491696259	-14.633901535879886
188.0	-3.0965263723559557	-23.09119183445619
189.0	-6.555473893109566	0.2529517864955019
189.0	5.644273872286265	-5.652886337039155
189.0	4.439361347979987	0.2168472629746192
189.0	-3.5281613271566856	5.18308728756903
190.0	0.22643659342958086	0.7695703019648937
190.0	-0.36539820382747235	0.08422394189201525
190.0	0.13896161039787566	-0.8537942438569079
191.0	-0.4866743198152315	-0.6113222917238965
191.0	0.290095711391007	-0.3654554760340491
191.0	0.19657860842422448	0.9767777677579457
192.0	-0.06545732683284716	-1.153126780244581
192.0	0.46625486964712654	1.0024757793412793
192.0	-0.4007975428142976	0.1506510009032932
193.0	-1.5223999217199629	0.050697458997762596
193.0	0.2830524246974212	-2.3200294997637068
193.0	1.4263187924931249	0.9384844013825184
193.0	-0.18697129547059443	1.330847639383437
194.0	-0.3800673472752604	-0.3218433886165349
194.0	1.4642867979024945	-0.22660731366049788
194.0	-0.09272203304571751	0.3866527788153174
194.0	-0.3545475159965869	0.37306407660418683
194.0	-0.6369499015849346	-0.21126615314247665
195.0	-0.4159708647656416	1.7262748310163096
195.0	-2.1423260229082937	-0.7663177760508115
195.0	1.6632323455437876	-1.474709457699019
195.0	0.895064542130142	0.5147524027334959
196.0	1.1794375305523541	0.16930955469089295
196.0	1.0945706937674509	0.29931452066825803
196.0	-1.4582646041032825	0.9567287145096319
196.0	-0.8157436202164714	-1.4253527898687544
197.0	-1.3776572735855235	0.8813318016014486
197.0	0.38342971713197277	-1.759963250829199
197.0	0.9942275564535554	0.8786314492277445
198.0	0.9688240126396002	0.5446759128336911
198.0	-0.888976992345978	0.041948709993172
198.0	-0.0798470202936361	-0.5866246228268603
199.0	-0.5198461954701907	-0.021513109158722864
199.0	0.3474372373861098	-0.16402219177386165
199.0	0.17240895808408097	0.18553530093258452
200.0	-0.9333808239007357	0.48812857961705974
200.0	-0.1563215071117755	-0.8041051503850236
200.0	0.2692477501463436	-0.492147571592089
200.0	0.820454580866171	0.8081241423600493
201.0	-1.692392505654651	-12.188243402302872
201.0	5.271867773321567	-8.698505521806013
201.0	5.308045800707506	9.164687173772748
201.0	2.457637932596713	9.098821308593786
201.0	-5.712862855344975	6.964442042121728
201.0	-5.632296145626187	-4.341201600379454
202.0	0.7267962985950969	0.2423264241092866
202.0	-0.7599749527837065	-0.031159838599767023
202.0	-0.6822589927269271	-0.3304153636101227
202.0	0.7154376469155372	0.11924877810062325
203.0	-2.3329716003411094	0.8222596593316512
203.0	-1.1486320938521717	-1.4548292204879927
203.0	-0.37470095432667977	-2.1959369523186045
203.0	2.2370977982408067	1.1639552651802458
203.0	1.619206850279173	1.6645512482947171
204.0	-2.616001244233424	0.27726726107373983
204.0	-1.3183000586770703	-2.918729946237736
204.0	3.9343013029104807	2.6414626851640004
205.0	-4.01438259169497	1.2556190915813434
205.0	-2.6523599000059863	-2.1667218646926063
205.0	0.0808327132252949	-2.265778492625667
205.0	5.410606017630146	0.4542153567913266
205.0	4.739743239763762	1.0585752800206842
205.0	-3.5644394789182776	1.6640906289249378
206.0	0.043078826120080634	0.5505214227394953
206.0	-0.25835971318582196	-0.14515911837636009
206.0	0.21528088706574133	-0.40536230436313525
207.0	-2.626207362479088	-1.2159007137794113
207.0	-0.7624106854644279	-3.2182491425271422
207.0	2.5963966904543128	-0.9690937550727016
207.0	2.6222877948473027	-0.8112206207978157
207.0	-0.8341495321770429	3.187541487569069
207.0	-0.9959169051810581	3.0269227446080045
208.0	0.4022449631480647	0.7551989668992591
208.0	-0.07032360226294257	1.453922944990765
208.0	-0.3903504556245966	-0.7996028621442666
208.0	0.058429094739489276	-1.4095190497457497
209.0	-0.6623096399457672	-0.6564363746447742
209.0	0.497968842428841	0.11742615275475665
209.0	0.1643407975169122	0.5390102218900195
210.0	-4.721517113831138	-2.866601796889047
210.0	4.3601420739971	-12.637946849312572
210.0	0.36137503983405184	15.504548646201616
211.0	2.6672500333493137	-2.0978576988947424
211.0	-0.7787700953672819	4.916127299237074
211.0	-3.378419317297517	3.1292936090450687
211.0	1.4899393793155409	-5.947563209387384
212.0	0.25927890771747386	2.1103310166429243
212.0	-1.3670338879437365	0.8265503747231163
212.0	1.1077549802262665	-2.9368813913660348
213.0	4.33131962744843	-4.430848598402869
213.0	-0.38647097024735133	7.040895641768194
213.0	-5.069135430750288	5.508003708666996
213.0	1.1242867735491953	-8.11805075203232
214.0	0.26685595245522103	2.501450592193112
214.0	-1.2416967610141596	1.7888580111340684
214.0	-0.6751568888436236	-0.8483583423127206
214.0	1.649997697402571	-3.4419502610144503
215.0	4.705951903487706	-0.06295667430432114
215.0	-2.0818187299740956	2.5955383645184926
215.0	-5.793611713015101	0.6598621557711807
215.0	3.169478539501494	-3.192443845985397
216.0	0.7502053257573472	-1.0714891909755666
216.0	1.1360287327158742	-0.5386336199316739
216.0	-1.8862340584732333	1.6101228109072325
217.0	-1.9651186549422412	6.25453425707547
217.0	-1.5199283142295368	-2.2547297706862937
217.0	1.732792246989615	-2.0398351034280053
217.0	1.752254722182136	-1.959969382961163
218.0	0.36240317952947293	1.3065155274552345
218.0	-0.6272323725176032	-0.6883929538129142
218.0	-0.33174858590999295	-1.2091490825565807
218.0	0.5965777788981245	0.591026508914259
219.0	-0.4934016368467429	-3.1832482612080453
219.0	4.95167428011576	1.7836973283123552
219.0	-1.3232124701875094	1.5917886963439194
219.0	-3.1350601730814573	-0.19223776344821855
220.0	0.04426468050604424	-1.4237554971399335
220.0	0.4547587235441638	0.1892111079670299
220.0	-0.4990234040502095	1.2345443891729084
221.0	-0.38911381017027846	0.624793590926023
221.0	0.06980388268415456	-0.4523386286057219
221.0	0.31930992748610815	-0.17245496232030333
222.0	0.7363788092675001	-0.5996596632358457
222.0	0.2374525971408194	0.6828943098321419
222.0	-1.6287538511492432	0.567965603173387
222.0	0.6549224447408665	-0.651200249769688
223.0	-8.758673345226414	5.01146515258592
223.0	-10.225994848424852	-0.9018973026203411
223.0	6.000232517701244	-7.5121948835622625
223.0	6.901589811482315	0.361009507319103
223.0	6.082845864467724	3.0416175262776046
224.0	7.398622534993024	-0.3267060374610002
224.0	6.812870975882285	3.7609398419483115
224.0	-4.732858455936861	5.994732066246318
224.0	-6.788605432493364	-0.4698916097189702
224.0	-6.179561267790039	-2.187666842492533
224.0	3.489531645344936	-6.771407418522164
225.0	0.0751027627891154	1.0414768846306188
225.0	-2.088989859973443	-0.9290543801431357
225.0	1.3566362867688346	-0.7786394828922678
225.0	0.6572508104154978	0.6662169784047698
226.0	2.2173303189692515	1.4555104540229302
226.0	-1.5673611759464534	2.727258431878557
226.0	-1.9260189828735295	1.4290518269647008
226.0	0.3963121886860339	-2.8430624059948033
226.0	0.8797376511646954	-2.7687583068713706
227.0	-3.650116334303443	-4.3066459589963415
227.0	-0.7695548018137838	-3.882301153331206
227.0	1.0508213990804176	-1.3557261325621812
227.0	2.735899497124241	5.144250580547132
227.0	0.6329502399126107	4.400422664342599
228.0	0.23514947595280705	1.4830590507340022
228.0	-0.5756416576418628	-0.33878592134339314
228.0	0.3404921816890699	-1.1442731293906085
229.0	-1.5654904070324134	-0.09686046976205778
229.0	1.342044384420693	-0.8099566838490565
229.0	1.737183620145002	0.34938323229506096
229.0	-1.5137375975332883	0.5574339213160722
230.0	3.8256922364381776	-0.4823388218999238
230.0	-2.1794145316414153	1.366708178216643
230.0	-1.646277704796761	-0.8843693563167292
231.0	0.4459130997248437	1.4899470176633394
231.0	-0.4984655805927403	1.7516022997190397
231.0	-3.912287814601767	-0.6717683621416831
231.0	3.9648402954696538	-2.569780955240686
232.0	-2.942912879714619	-0.319833210139259
232.0	-0.6362007356328004	-5.501248168883496
232.0	2.1912438898369233	-1.6809945146442102
232.0	1.3878697255104993	7.502075893666969
233.0	-6.8718925678554275	-3.122053348521381
233.0	9.032886199224992	0.9247299715953384
233.0	9.457057754064163	1.60540376595196
233.0	-5.354623088470965	0.3939431418036373
233.0	-6.263428296962795	0.19797646917045408
234.0	-1.4310788065402154	-2.55184608779715
234.0	0.6057273117041837	-1.8003141232784277
234.0	2.1934826663935625	4.727799431367132
234.0	-1.368131171557545	-0.37563922029155083
235.0	2.4097205302501545	11.351645023272983
235.0	-3.606328658308539	-3.6131830256069426
235.0	1.1966081280583547	-7.738461997666011
236.0	-2.8744740934172537	2.2247561447899753
236.0	-3.1523123339257757	1.772867936341423
236.0	-1.3909439533749046	-0.9155171927789502
236.0	3.24068427264667	-1.8354139898564121
236.0	4.177046108071217	-1.24669289849614
237.0	-5.707554335131131	-0.41958236868225235
237.0	5.527944694165536	-5.192347926494873
237.0	5.742516645158089	-1.9607858225990515
237.0	4.732835544071594	0.4773691503470515
237.0	-4.839713788873144	4.175135622571865
237.0	-5.456028759390961	2.920211344857229
238.0	1.1062925600692566	-3.341220402962094
238.0	1.5968166792074092	-3.18671807864685
238.0	-1.0009250135639545	3.1485761404707326
238.0	-1.7021842257127167	3.3793623411381986
239.0	0.09493121824930714	-0.6151408188602856
239.0	0.11312435072292637	0.7452068573478939
239.0	-0.09861904456837309	0.5466390502224346
239.0	-0.10943652440384555	-0.6767050887100484
240.0	1.730763263696278	0.1839185337436424
240.0	2.0673074033354117	3.4922526969471157
240.0	-2.0818882360876168	-0.04170010701692806
240.0	-2.2555859812259	-2.7222233302529903
240.0	0.5394035502818082	-0.9122477934208473
241.0	-1.438091840860801	-0.31627322215020526
241.0	1.2792398099171491	-1.5342001337474507
241.0	1.883993615774678	0.3805066973362757
241.0	-1.7251415848310239	1.4699666585613662
242.0	2.338356732557572	1.291398957095142
242.0	3.497010597894738	2.8652851454092225
242.0	4.177865271826619	4.373808044664796
242.0	-6.099501709004976	-4.200522395160563
242.0	-3.9137308932739945	-4.329969752008583
243.0	-5.598132938943557	0.9067123072851638
243.0	-0.7163430885288639	-12.258210417781356
243.0	0.8681823162107557	-13.046492000013101
243.0	3.435226800227152	11.599263755903308
243.0	2.011066911034507	12.798726354605991
244.0	-0.377412870619777	-0.36928856315410613
244.0	0.24546824552297244	-0.6401891601658783
244.0	0.33536838298934857	0.6359664282731944
244.0	0.28864314988316425	0.6577114190110269
244.0	-0.4920669077756933	-0.2842001239642521
245.0	0.6116300369108926	-1.7497591229691134
245.0	0.7087977684570942	2.022707895105812
245.0	-0.6035950873697254	2.080848234703988
245.0	-0.7168327179982554	-2.3537970068406997
246.0	12.46953761734697	-0.5333093995941619
246.0	-2.8484071920914777	5.361853114401811
246.0	-3.6895548478768587	4.540265870094128
246.0	-5.0390345461542365	1.871584499694737
246.0	-0.9519548981622469	-5.5368994258173245
246.0	0.059413866937821504	-5.7034946587792055
247.0	-0.4529443482302706	0.05328028568224994
247.0	0.5394356287499601	-0.3416856634607827
247.0	-0.08649128051967944	0.2884053777785428
248.0	-5.221098276933754	0.28632304202988046
248.0	0.7653999481772922	-1.4176961757836963
248.0	3.174325366152333	-1.1895281688652157
248.0	1.2813729626041315	2.320901302619032
249.0	-0.4194949688589862	4.793135352153472
249.0	-6.401097425406929	-3.2546400854182327
249.0	6.820592394265931	-1.5384952667352443
250.0	3.3767235902406463	2.3818140270437405
250.0	2.845477607088357	3.353035632954288
250.0	-1.1293659410551617	1.0056712045755936
250.0	-5.0776507853914845	-4.2674935892179215
250.0	-0.015184470882329854	-2.4730272753556926
251.0	0.25598185485241376	-1.5231296866478423
251.0	2.184754912101436	1.2368453104411061
251.0	-2.4407367669538376	0.2862843762067202
252.0	3.1969846428747237	-1.1771086881151835
252.0	2.540993985744886	1.045411768644963
252.0	-2.064187156397368	2.1932067279930063
252.0	-3.6737914722222365	-2.0615098085227808
253.0	-2.2041706631119413	-1.7292680771009568
253.0	2.307716668382626	-1.4810833952243534
253.0	2.0649537266713356	1.798775739089044
253.0	-2.168499731942012	1.4115757332362378
254.0	0.553442829249902	0.49978654416794416
254.0	-1.8083715601957002	-0.0002769178408415748
254.0	1.2549287309457868	-0.49950962632707663
255.0	0.3998012096869326	-1.2666685122377843
255.0	-0.19279303186222996	0.6306946581288191
255.0	-0.20700817782465458	0.6359738541089348
256.0	-1.5093259502324925	-11.95916385943223
256.0	5.755852384556985	6.004509683522806
256.0	3.8770497370229653	9.31585023523139
256.0	-0.13070351340308387	7.815054697935259
256.0	-5.487785444253966	-0.014612462895446878
256.0	-2.5050872136904365	-11.161638294361783
257.0	0.4565249289017862	-3.086687769276728
257.0	0.5080574116717678	-3.017192824939911
257.0	-0.9645823405735777	6.103880594216655
258.0	-4.473336570589117	0.19720832829264867
258.0	1.6795010801657881	-0.6482607713498639
258.0	3.1578011536613766	-0.1900349203334558
258.0	3.1775443675632387	-0.08635641789643912
258.0	-3.5415100308012706	0.7274437812871093
259.0	-0.8114316700135246	3.5071919412740544
259.0	-5.684471179849785	-2.344997257786727
259.0	2.9637640869495234	-2.6866620837929127
259.0	3.5321387629137746	1.5244674003055954
260.0	0.11638585595864828	1.9002728773132649
260.0	-2.70610218391183	1.1033835084832253
260.0	0.5969331795446408	-2.509259786942413
260.0	1.651799844462768	-2.1650536992893605
260.0	0.3409833039457743	1.6706571004353117
261.0	1.2176427997563968	-0.5486273687199312
261.0	0.7284099507544245	1.0282108481851413
261.0	-1.1222701397863435	-0.18135315587251466
261.0	-0.8237826107244905	-0.2982303235927048
262.0	3.2069156843661584	-3.5947090418583496
262.0	3.2768359682788932	-0.4557681820665013
262.0	-3.1414020402763057	2.0235645621551055
262.0	-3.3423496123687313	2.0269126617697455
263.0	6.923068470006527	-3.5404290840915045
263.0	7.608744797613335	-3.32231038169254
263.0	7.179245232343728	-2.6018056916690084
263.0	-14.100877122856861	8.70104310035526
263.0	-16.487364245872417	7.004739571669495
263.0	3.9097960298448946	-2.987418372914911
263.0	4.96738683892078	-3.253819141656764
264.0	0.7944381124004563	0.5958936845174574
264.0	-0.7159598846230609	0.5225822456409085
264.0	-0.9853283735018901	-0.7319690747580775
264.0	0.9068501457244947	-0.38650685540028845
265.0	1.4289529123773972	10.231459582403836
265.0	-6.8438781360404315	8.038580225569989
265.0	2.095572803838181	-9.22814745168045
265.0	3.3193524198248494	-9.041892356293383
266.0	-5.318886220769693	-0.08013722957275002
266.0	0.6132238106655911	-2.2317803865563204
266.0	2.6679773426743263	-0.9787469865687657
266.0	2.949073125183914	-0.6897647501654098
266.0	3.056505045366988	0.8454728598048098
266.0	-3.9678931031210967	3.1349564930583558
267.0	1.36884139393568	3.3546393394459373
267.0	-2.0992384393362733	-1.180966143824991
267.0	-1.7883603208494885	-1.9308073368175622
267.0	2.5187573662500653	-0.2428658588033394
268.0	0.9622578156041726	-2.9904793764724262
268.0	2.9436782426103885	-0.9121610110465165
268.0	1.456024947576725	1.3549825548807415
268.0	-5.3619610057913	2.547657832638204
269.0	-1.5840703722572764	2.930590462577844
269.0	-2.2930284989473253	1.7957888252630263
269.0	-1.7248710761369606	-3.304109881289021
269.0	-1.015464666319608	-3.301716883906498
269.0	6.617434613661193	1.8794474773546455
270.0	-4.846388582991079	2.0240465197088064
270.0	4.114809157648346	-5.521280497721799
270.0	4.147491791708525	-4.149213280491995
270.0	3.587149129552056	-0.3202781696837001
270.0	-7.003061495917869	7.9667254281886395
271.0	-2.1952354878760474	-2.30004297123943
271.0	6.151316659576446	0.7985914759052445
271.0	6.114636671038612	1.446820270020683
271.0	-3.5002183384800003	1.6830170122751449
271.0	-6.5704995042590015	-1.6283857869616416
272.0	-0.8133577490590973	2.1395046472377675
272.0	-0.689272501765341	-4.326432393476962
272.0	1.5026302508244391	2.1869277462391654
273.0	6.535720593047303	5.53205447731248
273.0	-5.338990819291511	9.098634445299103
273.0	-1.196729773755787	-14.630688922611569
274.0	-0.21828834937562472	9.68691466354815
274.0	-0.7239289174655147	-3.3806457969903967
274.0	-0.5571028352572653	-3.693595321245439
274.0	1.4993201020984142	-2.612673545312334
275.0	1.2599233100120115	-0.27695091209100864
275.0	0.24786494383836813	0.7699075113839549
275.0	-0.35940056763052136	0.5714574817127209
275.0	-1.1483876862198679	-1.0644140810056368
276.0	-0.11473779401202883	-0.10049075846862751
276.0	0.08698750890212305	-0.19305418899924603
276.0	0.027750285109890846	0.29354494746787896
277.0	2.168430179592048	-3.6026482332548744
277.0	-0.9758525802385547	5.577164141948362
277.0	-1.95425681440313	3.5248454064286245
277.0	0.7616792150496472	-5.499361315122103
278.0	3.269959066602854	-4.097275870102732
278.0	6.800010867670523	-2.938271610596445
278.0	4.247616869429726	5.195039691549496
278.0	0.8043888823606642	9.478720559583797
278.0	-9.89018479646404	-2.3417323024196093
278.0	-5.231790889599737	-5.296480468014536
279.0	1.8960519374430633	1.0092198498639733
279.0	-1.1426960875309835	0.717554047881277
279.0	-0.7533558499120661	-1.7267738977452538
280.0	4.9607407315705805	-5.104986510601029
280.0	-0.6120440415562048	3.7532455148616495
280.0	-1.7532611898308408	4.479352836041147
280.0	-2.595435500183567	-3.1276118403017796
281.0	5.4854243448194	1.5837225722987012
281.0	3.8633579852587543	3.169241416891338
281.0	-5.228067241704135	6.964759854459378
281.0	-7.403777706193442	5.9152233207213225
281.0	-7.290082476030522	-8.649019656944523
281.0	10.5731450938499	-8.983927507426225
282.0	-2.1291725580754486	2.6456391577628944
282.0	-2.7482374826036904	0.8227364958793716
282.0	1.4949010613820024	-2.9060354312314223
282.0	2.0179299242129556	-1.765096003385102
282.0	1.3645790550841987	1.2027557809742313
283.0	-0.5435217644576689	-0.6276387035618636
283.0	0.2864843467268937	-1.1797816342001617
283.0	0.25703741773078326	1.807420337761997
284.0	0.2530971335174161	-0.2120563904079443
284.0	-0.055286743562727045	0.22494206177487894
284.0	-0.19781038995468905	-0.012885671366934621
285.0	-0.3032630359665324	-1.6612022910715523
285.0	0.8168059681378766	0.8255674297485481
285.0	-0.5135429321713583	0.8356348613230186
286.0	-0.07214097297664561	-1.7225820367943765
286.0	0.7078855662416562	-1.7016048172733969
286.0	0.8227801799038907	1.3480281376341825
286.0	0.3079936291122592	1.9943390882066834
286.0	-1.7665184022811897	0.0818196282268733
287.0	-1.9847986608761294	1.3183749435678047
287.0	-1.314506433322559	-4.22047703167154
287.0	3.299305094198683	2.90210208810374
288.0	-5.795407119057767	-4.654289889057247
288.0	-1.7493753866679913	-5.819816048203858
288.0	5.294222634458848	3.598012712358011
288.0	2.250559871266888	6.876093224903105
289.0	-5.0102088238211975	-0.945211357062105
289.0	-3.273104915969404	-3.3232587093730324
289.0	4.42087979867887	1.9633702791528944
289.0	3.8624339411117075	2.305099787282251
290.0	-0.9025602789285697	1.680589045552885
290.0	-0.8912203229472254	-0.7431921972307755
290.0	1.410053722781329	-2.03255604950987
290.0	0.38372687909446634	1.0951592011877183
291.0	-0.9947649173547916	0.2444375883804811
291.0	-0.2195981735807952	-0.3723836873482619
291.0	1.2143630909355867	0.1279460989678009
292.0	-0.3610988402283063	-1.065087874546378
292.0	1.9215762419607143	0.0440550757853683
292.0	-0.6662172319745023	0.8237814535328545
292.0	-0.8942601697578855	0.19725134522815704
293.0	0.7598246326935906	0.3259017095328462
293.0	-0.4861591606681367	1.5748780398609499
293.0	-0.4095572739811092	-0.8577028667384051
293.0	0.1358918019556492	-1.0430768826553947
294.0	1.5582185464727663	1.1524271634999868
294.0	1.523851623785503	1.29017363584526
294.0	-0.21450250431140724	1.6395187329299388
294.0	-1.3706169926930907	-0.29784104357750707
294.0	-1.4969506732537672	-3.784278488697684
295.0	0.027245567692023933	-0.4429423405879196
295.0	0.1712316760993785	0.23486249368652876
295.0	-0.19847724379139461	0.20807984690140324
296.0	-0.7854993062082343	0.1262441290262332
296.0	-0.6548872080018978	-0.16484253174595379
296.0	0.44486501378603077	-1.2176576927065068
296.0	0.6926105581044001	-0.019067430484110706
296.0	0.30291094231971305	1.2753235259103046
297.0	-1.0430238313026508	-1.0378510857573138
297.0	0.8382134483577023	0.4442762619449919
297.0	0.20481038294494483	0.5935748238123277
298.0	-3.5963282135596586	5.241291792876354
298.0	-4.074617453638355	2.5523395275827534
298.0	-1.1011954525840049	-5.8394884235183255
298.0	7.466059860634987	-3.7722318020183594
298.0	1.3060812591470767	1.8180889050775153
299.0	-0.053943141834207294	-0.3768093411109846
299.0	0.17179050312336602	-0.6365250425949188
299.0	-0.11784736128915554	1.0133343837059232
300.0	3.336169285651513	3.8062933769261034
300.0	3.134991640418615	4.003563381168827
300.0	-3.3818763098673026	-3.916457847447239
300.0	-3.089284616202832	-3.893398910647699
301.0	-0.4344756673160814	-0.3903566675759137
301.0	0.46249406323687725	0.08607087526760045
301.0	-0.028018395920797697	0.3042857923082932
302.0	-1.514810693476196	-1.0610852227438001
302.0	-1.218701358698963	-2.498698529407161
302.0	1.8260972486240064	1.9259584195576456
302.0	0.9074148035511537	1.633825332593323
303.0	-0.27729011162224565	0.46432263215350683
303.0	0.030424029121316656	-0.6362995013687558
303.0	0.24686608250092218	0.17197686921523642
304.0	-0.8839786914809149	0.19038684525948815
304.0	0.7057644890777589	-0.6890642563426802
304.0	0.17821420240315863	0.4986774110831781
305.0	-1.1967172199222769	2.7260552686163604
305.0	-2.2363996434138427	0.9336094643970936
305.0	0.38345058961327616	-3.4029083869740973
305.0	3.04966627372284	-0.2567563460393628
306.0	-3.5922641115144205	0.05131974666518998
306.0	3.1866212402321703	-5.334776966042519
306.0	2.22831973545098	0.8706504772607957
306.0	1.5267908464480575	1.473956004530426
306.0	-0.6811411326890056	1.8193474994749044
306.0	-2.668326577927795	1.1195032381112064
307.0	2.735356596490387	-1.9886732466389068
307.0	3.2777046723035874	3.9342221580215133
307.0	-2.6158998129877538	0.1271100504540126
307.0	-3.3971614558062244	-2.0726589618366096
308.0	3.125911591767421	-1.5980438049427943
308.0	-2.1057793022836933	5.602925680162401
308.0	-1.020132289483741	-4.004881875219597
309.0	-1.0890448428130253	-1.3543584366292838
309.0	0.8837240972878996	0.2404254807987658
309.0	0.20532074552512575	1.113932955830518
310.0	-2.9589489547102508	0.6690412518552932
310.0	4.715325596600768	-2.839747769533365
310.0	-1.7563766418905196	2.1707065176780582
311.0	-0.5204776601038694	5.260464249622146
311.0	-3.7621299688732424	-0.0979359691322434
311.0	-2.224681646594701	-3.1399244484525366
311.0	1.224315191748838	-2.9294395202830974
311.0	5.282974083822976	0.9068356882457426
312.0	2.9308219209223516	5.785443799401918
312.0	-6.777569433094056	-5.190563006064167
312.0	0.10250543954334072	-3.8549547708164074
312.0	3.7442420726283694	3.2600739774786813
313.0	-5.869302212271139	-3.886752587470764
313.0	-5.916740245748353	-5.0733896446500015
313.0	3.5776227557861824	-8.654796738003917
313.0	5.119843365955251	-7.843597978466247
313.0	2.1716175699184124	13.280434138394579
313.0	0.9169587663596623	12.178102810196362
314.0	1.3742003226581698	1.0526815715190054
314.0	-2.586973325308643	-0.09233901746253366
314.0	-0.11800757793473467	-1.1535377166953822
314.0	1.330780580585195	0.19319516263891665
315.0	0.5123295648626167	0.6442706209086666
315.0	-1.2448850672704008	-0.02192894489442113
315.0	0.7325555024077852	-0.6223416760142525
316.0	-1.5857073631340268	0.9812491962791288
316.0	-1.3340757917323804	0.7324264938088291
316.0	2.0404900861831434	-1.4399712116676417
316.0	0.8792930686832646	-0.27370447842034445
317.0	-1.7599169659389633	4.113552413524784
317.0	-4.443020203470122	4.32004996097611
317.0	6.202937169409086	-8.433602374500895
318.0	-0.05293793380770398	0.4443015731789144
318.0	-0.2235029729495969	-0.030478516827780418
318.0	0.2764409067573216	-0.4138230563511534
319.0	-1.1522825094389497	6.357785590133611
319.0	-3.789635358086006	-3.437841710057294
319.0	4.941917867524946	-2.9199438800763025
320.0	0.5267603308090524	2.0708031016135426
320.0	-0.09078610118356044	1.9127657427312956
320.0	-1.0868260268290684	0.018227566148988225
320.0	-0.4545618606805549	-1.5981164887265769
320.0	0.10331266037032695	-2.0888461788162
320.0	1.00210099751379	-0.31483374295104394
321.0	-0.6305559125946572	0.4873015286347439
321.0	-0.7516956077015096	0.11394481289677538
321.0	0.521911192970976	-0.33634153470360745
321.0	0.8603403273251695	-0.26490480682791423
322.0	4.497241057395586	-0.01570080448596557
322.0	1.531874126179269	4.137101534276557
322.0	-6.029115183574846	-4.12140072979058
323.0	1.9516249008623272	2.151453665674521
323.0	-4.705047060549785	0.6739724106043702
323.0	2.753422159687456	-2.825426076278884
324.0	0.5747353034341233	-0.6072799285411972
324.0	-0.3200477255278447	0.9708340438557395
324.0	-0.25468757790627544	-0.3635541153145357
325.0	-3.2729748638609117	0.6831086154883104
325.0	7.573951039316564	-4.21775649182671
325.0	6.858859149919606	-2.4915776291395417
325.0	-5.349662916235157	3.019795898417368
325.0	-5.810172409140092	3.0064296070605456
326.0	-4.300068414314154	5.672645900023242
326.0	4.025273544173999	-5.918899160523727
326.0	4.2785029592466195	-5.558503419007232
326.0	-4.003708089106444	5.804756679507706
327.0	0.4658760992917401	0.8519518365780937
327.0	-0.17802849112552283	1.0435248952770149
327.0	-0.2878476081662362	-1.8954767318550831
328.0	-0.6093620963508711	2.5282689124773214
328.0	-3.9875915103334645	-1.2483767201286184
328.0	3.00456629951414	-2.866809261765312
328.0	1.5923873071701948	1.5869170694166124
329.0	3.5615707899872238	-0.7555967794606493
329.0	3.6741889696488186	-0.25285671076901484
329.0	-3.6431165002234907	0.740764670344813
329.0	-3.5926432594125695	0.26768881988486437
330.0	-0.296909363391893	0.13557033287807713
330.0	-0.3293728923632832	-0.03068920733839054
330.0	0.626282255755163	-0.10488112553969207
331.0	-2.730740734490987	-4.504752785306308
331.0	-1.1960541833611535	-5.108188324060651
331.0	5.469964890457491	1.430833186700828
331.0	-1.5431699726053438	8.182107922666134
332.0	2.975779720991714	1.587360318091249
332.0	-4.184260920785838	1.3629439904689653
332.0	-1.5998510268862525	-2.699961197399793
332.0	2.8083322266803745	-0.25034311116041624
333.0	-10.44976524163303	-2.8421562740634023
333.0	-3.536233221204264	-12.898649276199494
333.0	8.109361822160714	2.6719948992477254
333.0	7.301873141284445	3.610449255722017
333.0	-1.425236500607887	9.458361395293158
334.0	-2.5171080712266227	-5.215413160903376
334.0	2.289487795801463	0.9737772590627883
334.0	0.22762027542517183	4.241635901840595
335.0	0.6070748373724095	-2.1071668012135376
335.0	0.3640590803636002	1.5463908843092162
335.0	-0.9711339177359939	0.5607759169043227
336.0	1.2499427849041798	2.273189138760531
336.0	-2.6613428020313026	3.2653834612522346
336.0	1.411400017127132	-5.538572600012755
337.0	-0.21103945639478688	-2.0391082554082125
337.0	2.257486253417436	4.726952665007444
337.0	-2.0464467970226545	-2.687844409599226
338.0	-0.7116110374044501	6.53855595387143
338.0	-9.924738968906157	-11.831904544574373
338.0	-9.707619349261	-11.83435470525489
338.0	13.16916759067459	7.062462402757754
338.0	7.174801764897004	10.065240893200054
339.0	-7.354516381074812	-5.450267576852828
339.0	7.917132011211036	2.9516148719432063
339.0	-0.5626156301362281	2.498652704909622
340.0	6.704842309647953	1.830209988077195
340.0	0.6937002318689827	5.376905099060996
340.0	-4.892303557243591	-3.358679143871411
340.0	-2.5062389842733435	-3.848435943266779
341.0	-2.5472387518775528	-1.1395766913173004
341.0	1.4906124983532578	-1.316385644381053
341.0	1.0566262535242814	2.4559623356983566
342.0	1.4900035358658488	-0.09923953855704577
342.0	-2.304187999022651	0.6334318791272715
342.0	0.8141844631568094	-0.5341923405702241
343.0	-0.14840816958800054	-1.2757153806279757
343.0	0.4881947563409849	0.483466515498705
343.0	0.14063954201935627	1.2963117860079618
343.0	-0.4804261287723539	-0.5040629208787173
344.0	-0.5669204851410796	-1.3682166808973226
344.0	0.8593190074848804	1.2641296871154666
344.0	0.29396011975258474	1.4579115558243179
344.0	-0.5863586420963746	-1.3538245620424707
345.0	0.1371301240314477	-0.029314343685771224
345.0	-0.525488745281622	0.30604595307632476
345.0	0.38835862125017484	-0.2767316093905251
346.0	-3.6128036837909545	-2.2362052186266053
346.0	2.887128212032038	0.044082112753830414
346.0	0.7256754717589109	2.192123105872769
347.0	3.1383551872537536	-7.508758371462582
347.0	-1.9790958350036845	8.218961727498003
347.0	-3.2334540079263636	7.821365868192924
347.0	2.074194655676288	-8.53156922422837
348.0	-6.222437010565769	-1.4538829650191627
348.0	-5.0172700351751	-4.298555818759537
348.0	5.294807775708537	0.0584115959236336
348.0	5.944899270032332	5.694027187855067
349.0	0.7402475352878728	-0.039656688751227034
349.0	0.13411548021117306	0.5164766810569051
349.0	-0.874363015499093	-0.4768199923056844
350.0	-0.8670733842920392	2.1546894036255466
350.0	-1.4944448533398953	-0.2375481825760994
350.0	1.1735833105291336	-0.9683814346946483
350.0	1.1879349271027868	-0.9487597863548013
351.0	-4.147793822743393	2.2947753374134203
351.0	2.380354135953077	-8.272562780160092
351.0	4.334498031366188	-5.815773010729602
351.0	2.3280081985506014	3.4841384495352314
351.0	-0.3967541541505314	5.122249067705964
351.0	-4.498312388975926	3.1871729362350667
352.0	-4.187729612967035	-3.149695503303742
352.0	6.887002500695106	0.6494492285199196
352.0	1.6154514552698196	5.1234593500677335
352.0	-4.314724342997884	-2.6232130752838994
353.0	-1.0866937976544162	-0.14159584524006472
353.0	-0.02513552990825416	-1.648940358747462
353.0	1.1118293275626603	1.7905362039875095
354.0	-1.9467197819897593	-1.451322840927992
354.0	1.734651993950139	-1.5771504748100231
354.0	0.2120677880396204	3.028473315738015
355.0	-1.9237880533394143	-0.6320680091352046
355.0	3.464492524737567	-3.2328584689004485
355.0	-1.5407044713981626	3.864926478035692
356.0	-0.35321259838190056	2.2509423237687938
356.0	-0.2438712109875624	-2.3435360128855804
356.0	0.6437878732447291	-2.1856514740566113
356.0	-0.04670406387527812	2.2782451631734153
357.0	-5.891098316452366	-1.8233070697293166
357.0	5.6824025950333015	0.3190238172274977
357.0	6.166372215439581	0.8910877874733877
357.0	4.579456512206858	2.0985521973531718
357.0	-4.591967746677017	0.24775918550464984
357.0	-5.94516525955035	-1.7331159178293705
358.0	-12.771825138452654	1.237406157090627
358.0	-8.655824881058477	-4.166908683024405
358.0	8.193296251955156	-0.7553652767563787
358.0	7.818278309315231	1.1736961439205744
358.0	5.416075458240781	2.511171658769582
359.0	-2.499043868984093	-0.9318580912955688
359.0	2.2664971764824116	-0.8446251527486086
359.0	0.23254669250168483	1.776483244044179
360.0	2.358872280161962	-4.586811354423167
360.0	4.952976415252124	0.9199293845884733
360.0	-2.3734816345364935	3.426236845991881
360.0	-4.938367060877611	0.24064512384279163
361.0	11.566359628572473	-4.378227483093063
361.0	6.317343156816411	4.7752365095160005
361.0	-17.883702785388895	-0.39700902642292873
362.0	2.9962681546576295	-0.41300486144649545
362.0	-1.7804453103944333	7.490839485682571
362.0	-3.394542729541464	-4.160768106691775
362.0	2.178719885278262	-2.9170665175442947
363.0	-1.1949463860227676	-1.1802076056867676
363.0	0.9227767946355457	0.24229062027200451
363.0	1.265801483963738	1.2546736342092413
363.0	-0.9936318925765169	-0.3167566487944747
364.0	0.03776825060497945	0.03280329664123703
364.0	-0.0326738934425866	0.0018085531846168015
364.0	-0.005094357162391342	-0.03461184982584603
365.0	-2.213988484944218	4.404700011892503
365.0	0.9341288705069	-4.81407493732658
365.0	1.5075362821410943	-4.635501852020968
365.0	0.9958246565335489	-0.9073118424894333
365.0	-1.223501324237303	5.95218861994449
366.0	0.6216030432037188	-0.05861445334299037
366.0	-0.9466988979562829	0.2836989843263772
366.0	0.3250958547525696	-0.2250845309834147
367.0	5.984743593643972	-4.190772456684902
367.0	3.9723660435048584	8.365174011874046
367.0	-5.511940900875743	-1.0159885429878381
367.0	-4.445168736273088	-3.158413012201306
368.0	1.2589335982595458	0.662114757148475
368.0	-1.086272838026534	0.9722883583447067
368.0	-0.8175309885514264	-1.009809419922062
368.0	0.6448702283184148	-0.6245936955711197
369.0	-0.010452715131504076	0.387994990747514
369.0	-0.5323307131706378	-0.6393062974966567
369.0	0.5427834283021271	0.251311306749129
370.0	-0.6804604436797882	-0.5186629353284464
370.0	-0.17640994159795328	-1.4996559094273039
370.0	0.8568703852777102	2.018318844755756
371.0	0.27580248568040044	1.3419337601953947
371.0	-1.2176355163800487	0.7772980402582454
371.0	-1.286264144897663	0.6452698067565779
371.0	0.47523247545160535	-2.2544260840838253
371.0	1.7528647001456903	-0.5100755231264206
372.0	3.264418804076946	0.09781505631596313
372.0	-0.2472776869250194	4.0651690299824095
372.0	-2.0553581656548414	-1.3504419623593817
372.0	-0.9617829514970723	-2.8125421239389965
373.0	-0.1571658582780627	-1.1623236764040927
373.0	1.2096776555556785	0.8000339453217147
373.0	-1.052511797277611	0.3622897310823843
374.0	0.6673038472572299	0.20511753654793172
374.0	-0.8215082177505109	0.5640020609908172
374.0	0.15420437049326238	-0.7691195975387616
375.0	-0.02153121748464143	-0.44691811303023155
375.0	0.2787268276293064	-0.31846205098700503
375.0	-0.2571956101446518	0.7653801640172302
376.0	0.2620372536811993	-1.0216637246470308
376.0	0.12000705422313475	1.0656366336109864
376.0	-0.3820443079043391	-0.04397290896393619
377.0	0.0057365387731723744	-0.01278513037142531
377.0	0.005855591099457062	0.01765616375304124
377.0	-0.011592129872628264	-0.004871033381647685
378.0	2.089041524155787	-0.05082455709866152
378.0	-2.0365477142912103	0.9610749311726019
378.0	-0.05249380986456551	-0.9102503740739518
379.0	1.0874079583673895	1.2709231414032287
379.0	-0.8601871386896812	-0.1284256457174648
379.0	-1.7759638881433468	-1.7296695797404884
379.0	1.5487430684656371	0.5871720840547312
380.0	-0.6410096481642263	0.5883568651669925
380.0	-1.0076054091034314	-0.45404213740635485
380.0	1.6486150572676468	-0.1343147277606286
381.0	-0.2581679501786251	0.7267472645336815
381.0	-0.4544203642038609	-0.8995965441861609
381.0	0.7125883143824902	0.17284927965251087
382.0	0.19332266560075081	-1.8382153840341497
382.0	0.5279193251276726	0.6854684997353464
382.0	-0.09710331919365492	2.8654957015875024
382.0	-0.6241386715347745	-1.7127488172886955
383.0	2.087409257137303	-1.158106401920504
383.0	-1.7444858849121012	1.4473910052065129
383.0	-1.862444217960589	1.0239812419953223
383.0	1.5195208457353917	-1.313265845281316
384.0	-0.01595973347336496	-1.1500873638077636
384.0	0.7513539077109849	0.2867404617403023
384.0	-0.7353941742375987	0.8633469020674625
385.0	-0.48666197215568086	-0.1247174610008421
385.0	0.12513402201567564	-0.28980829289248566
385.0	0.3615279501400024	0.4145257538933417
386.0	3.314845236984264	1.3396861172485153
386.0	2.9155080127608173	1.5419692900061457
386.0	-4.130363253096988	-1.2676303903835056
386.0	-4.090608465986317	-1.4285208396919111
386.0	1.9906184693382343	-0.18550417717923626
387.0	-6.3907558421305275	-7.516776942683529
387.0	10.65203421841155	1.5598363198848813
387.0	-4.261278376281026	5.956940622798619
388.0	2.848657397211087	2.0491475912286163
388.0	-2.872602765599517	0.17246563031259063
388.0	0.023945368388436215	-2.221613221541211
389.0	-3.6300358926955862	0.6836045170857762
389.0	2.9913571003075936	-1.8166414281948404
389.0	2.549932782326047	-0.27867025846974436
389.0	-1.9112539899380547	1.4117071695787657
390.0	-3.0755437315548693	-2.7355686792412865
390.0	1.9592187153290084	1.2168727328102846
390.0	1.1163250162258336	1.5186959464309855
391.0	-0.1094577240621913	-0.08068905272921702
391.0	0.5740886356091063	-0.7778191931697849
391.0	-0.46463091154695374	0.8585082458989602
392.0	2.1550936539775916	-0.4757035172882497
392.0	-2.07917256756492	0.7681041344056562
392.0	-2.2323907569518315	0.48236373238327
392.0	2.156469670539179	-0.7747643495006507
393.0	0.8557973377663327	-0.5634088041835407
393.0	0.1820052537564574	0.5950516617477305
393.0	-1.0378025915228246	-0.03164285756416488
394.0	7.586342628268942	4.581202036564956
394.0	4.8400877148306565	9.52059312085739
394.0	-6.507844849942487	-4.7864953065793925
394.0	-5.918585493157139	-9.315299850842946
395.0	0.17135400300895234	-0.8670667671858804
395.0	0.6450563031416774	0.44259435098555105
395.0	-0.6132753965092933	1.267273193969762
395.0	-0.2031349096413463	-0.8428007777694311
396.0	-0.32822847675394395	9.119373416288745
396.0	-1.316462214004178	8.401855994017778
396.0	-3.1697729284965908	-4.479476689567182
396.0	4.814463619254681	-13.04175272073934
397.0	3.4864340608174302	2.0274136360528785
397.0	2.518011873993628	1.775184559013334
397.0	-3.8724714859826763	-1.3854450164533698
397.0	-2.1319744488283368	-2.4171531786128977
398.0	-1.19213829133649	0.5194867164958532
398.0	-0.3474343940919985	-0.7363662372411187
398.0	1.5395726854284761	0.2168795207452726
399.0	-0.07192812736620433	0.03119827307001147
399.0	0.03242370461740787	-0.07388100052033604
399.0	0.03950442274879645	0.04268272745032457
400.0	2.9035998729892922	-6.952232535412151
400.0	2.1698151792615246	6.777452296552002
400.0	-5.073415052250805	0.17478023886015648
401.0	1.3223957174595686	-1.5557817819646413
401.0	-0.5429727926837037	2.1080537250473657
401.0	-0.7794229247758768	-0.5522719430827167
402.0	0.017423464009746398	-0.09067141238383647
402.0	0.004660219453024471	0.04476602828773943
402.0	-0.02208368346276947	0.045905384096111175
403.0	1.12565028400553	-3.3661976488719256
403.0	1.4162630057085421	4.069180310817316
403.0	-2.5419132897140706	-0.7029826619453763
404.0	-8.166313976350654	-2.2236644825591174
404.0	5.647497775891872	-4.7090630850280295
404.0	1.6105935260882813	3.26967252692706
404.0	0.9082226743705	3.6630550406600917
405.0	-0.0005321605958945965	-0.06630073905925
405.0	0.09265554224234929	0.016966475447158316
405.0	-0.09212338164644622	0.049334263612109915
406.0	-0.12313880781449074	0.04361388956829696
406.0	0.1306337534020268	-0.14294240291188154
406.0	-0.0074949455875398625	0.09932851334361276
407.0	-0.314604322803617	1.5630402381576005
407.0	-1.380633174127136	-0.6304290852874288
407.0	1.6952374969307216	-0.9326111528702038
408.0	-0.06876271961648116	0.0062573422245082765
408.0	0.055326492026266494	-0.06230006661879714
408.0	0.013436227590228082	0.05604272439427391
