# Supplementary material
Source: ML conference proceedings conference paper supplement (https://openaccess.thecvf.com/content/CVPR2021/html/Harel_Crossing_Cuts_Polygonal_CVPR_2021_paper.html)
Supplement: Supplementary file 2 [file Harel_Crossing_Cuts_Polygonal_CVPR_2021_supplemental.zip › Dataset/D4/p6/pieces.csv]

piece	x	y
0.0	0.3150687738955498	0.8994000429728823
0.0	-0.8351894107578506	-0.20956814603041446
0.0	0.5201206368623	-0.6898318969424823
1.0	0.037697621811703164	-0.03887679968148523
1.0	-0.029729196215055955	0.05647053361729079
1.0	-0.007968425596658441	-0.017593733935796843
2.0	-1.0001199548636375	-1.131051344092708
2.0	1.290610764882638	-0.3588559709331658
2.0	0.8636601039894358	2.3622087266449796
2.0	-1.1541509140084083	-0.8723014116191279
3.0	0.14441811418092615	-0.43082734058828187
3.0	0.41207735643404014	-0.48205849943026297
3.0	0.1756012428374729	0.8508388473737025
3.0	-0.7320967134524207	0.0620469926448504
4.0	-3.9562196743198803	-6.371297919230476
4.0	8.637285392545392	0.7570146680077245
4.0	-4.6810657182255495	5.614283251222731
5.0	3.8553100090382113	-5.798546777846155
5.0	5.36843623285724	-5.133395518103064
5.0	4.532252538154371	-0.6569568737564824
5.0	-5.945294269568984	6.504163214033186
5.0	-7.810704510480838	5.084735955672516
6.0	0.9460509135159426	0.7768839921796926
6.0	-2.3901162930890307	-1.1799063555979121
6.0	1.4440653795731033	0.4030223634181989
7.0	-0.55952744780676	0.8761443966990513
7.0	-0.4318536652846627	-0.09084428290279672
7.0	-0.23236521707703547	-0.296958318228478
7.0	1.2237463301684295	-0.48834179556777063
8.0	-1.3763301708807196	0.4651720055161455
8.0	0.6559396853410037	-0.9806959454488383
8.0	0.861954411562829	-0.7323962232695171
8.0	-0.14156392602309287	1.2479201632022199
9.0	-4.350065854636934	1.8190316649777165
9.0	-0.8482596534268376	-4.088599818580654
9.0	4.755079375725804	-4.828914886859918
9.0	0.4432461323379638	7.098483040462864
10.0	-0.1270698390613858	1.7352894527864928
10.0	-0.7066270864710782	-1.2134069791139384
10.0	-0.309749369369354	-2.2271628563712267
10.0	1.1434462949018347	1.7052803826987144
11.0	-2.557157093667132	-0.8597988686971378
11.0	-2.5099239811152048	-1.0037887726366075
11.0	2.114981764093693	-0.2479660168079809
11.0	2.9520993106886464	2.1115536581417187
12.0	0.9251627453106507	-0.020215367994613993
12.0	0.11017491147172068	0.7957912782791514
12.0	-0.499647078965363	0.32266921561175904
12.0	-0.8667298156200828	-0.335867005011165
12.0	0.33103923780305206	-0.7623781208851687
13.0	-3.5138056400928157	10.838382571786822
13.0	-8.343665721907307	6.647749671925258
13.0	4.0749878355740705	-9.428057096452559
13.0	5.568415943108927	-8.830533666749112
13.0	2.214067583317112	0.7724585194895973
14.0	-2.5921024894139872	-0.47624834604779986
14.0	0.6210973947867034	-1.9161059457738285
14.0	1.112770156995918	-1.5253000387870124
14.0	1.7085847094620021	2.0967843229299628
14.0	-0.8503497718306241	1.8208700076786883
15.0	-0.6715034946248482	7.856074230788964
15.0	-3.0306357651189337	-6.921333671716636
15.0	-1.6746890866460258	-6.955273613884922
15.0	4.419139823155544	-2.1357164052172672
15.0	0.9576885232342572	8.156249460029864
16.0	-5.853329103005822	3.07827953412692
16.0	-5.659498358853509	1.2692913818910632
16.0	1.2691730035157973	-7.238502476552888
16.0	5.384212469313945	-2.9793320155454035
16.0	5.53157953058425	-0.9938044394488219
16.0	-0.6721375415546532	6.864068015529148
17.0	5.243061285233549	0.8999248389489848
17.0	-0.006712564609418034	2.1586022355234866
17.0	-6.021313914380561	-0.6637878297858333
17.0	-5.855463552639579	-0.7963698657781172
17.0	6.640428746395981	-1.5983693789084887
18.0	-2.5374324814497893	9.169318258234634
18.0	-6.564273990680624	3.48384045547627
18.0	9.101706472130411	-12.653158713710896
19.0	0.19644045636194343	6.246591492450571
19.0	-2.5674990968077567	-5.261782808132308
19.0	-1.781322848491067	-5.453083690753737
19.0	4.152381488936894	4.46827500643553
20.0	-1.6173858578543419	-1.6512434349544023
20.0	-0.9656165420293837	-1.666555682130935
20.0	1.6632625122110316	1.2262068150349414
20.0	0.9197398876726955	2.09159230205041
21.0	1.432775765320666	-0.9313169103028606
21.0	3.362455985597841	-1.3192785116762604
21.0	0.5227936209959746	0.9255794050434675
21.0	-2.6567853370820718	0.6642227101746214
21.0	-2.6612400348324083	0.6607933067610309
22.0	1.1316763474946	-0.3628155493583197
22.0	1.0906926976015159	0.7699860484845991
22.0	-0.43452747427230165	2.763210627884675
22.0	-1.2509961229240518	-0.7006690791123398
22.0	-0.4027140796431625	-1.2045747535613944
22.0	-0.13413136825661523	-1.265137294337225
23.0	-0.6673913941509867	-0.7972814465596864
23.0	0.006401286553307321	-0.6526743759211929
23.0	0.462804323890599	0.618932161564604
23.0	0.19818578370708034	0.8310236609162753
24.0	0.38178610294433896	-2.8871443533028143
24.0	3.074134477900655	-2.1681574898694254
24.0	-0.593763961515958	3.4666157932202792
24.0	-1.6234965883475534	3.9113020982372855
24.0	-1.2386600309815152	-2.322616048285295
25.0	2.7484955267896374	-3.9926390590899437
25.0	3.1700849197225556	-3.7710683904748126
25.0	-2.0164895029146805	12.77834308193453
25.0	-3.9020909435975124	-5.014635632369774
26.0	1.6886336300034614	-3.0330617086013065
26.0	3.0633625987514117	-1.802571520080498
26.0	-4.75199622875486	4.8356332286818136
27.0	2.1731840557034423	0.979554722611009
27.0	-2.146978130269796	3.8959123778544855
27.0	-3.656218820133269	-3.360184638371071
27.0	3.630012894699633	-1.5152824620944212
28.0	0.540892113812458	1.5577390955825139
28.0	-1.467228840134649	-0.16250386664568486
28.0	0.20612533330082716	-1.2051528191804217
28.0	0.7202113930213523	-0.19008240975641835
29.0	2.096416193750369	-2.7486056902824783
29.0	-0.1532732957068287	6.12532494355614
29.0	-1.069756937939465	-1.458861497802416
29.0	-0.8733859601040757	-1.9178577554712462
30.0	3.897906678746094	1.715124490846523
30.0	1.5168097799161493	3.557364009377412
30.0	-2.847403128182515	-1.4298876873050381
30.0	-2.567313330479721	-3.842600812918928
31.0	-2.5580246175610646	2.3983728445818877
31.0	-0.19963811358898262	-1.3340742078038696
31.0	2.7576627311500608	-1.064298636778059
32.0	0.08444298103545965	0.6927835217475188
32.0	-0.7296817929709862	0.05642569537614561
32.0	-0.03959182004132299	-0.5446621177314409
32.0	0.0035737267431903597	-0.5612084480090119
32.0	0.6812569052336335	0.3566613486167641
33.0	-6.589760573834767	-0.39446626451594985
33.0	9.546832186025144	-4.498468306596292
33.0	9.660681044128127	-3.1061878106536356
33.0	1.9094654000129407	2.283442884748444
33.0	-0.8227313738831895	3.3979493218827366
33.0	-7.044122336109619	2.4903410063409877
33.0	-6.660364346338633	-0.1726108312063039
34.0	-0.12815538455930725	-1.8880375799781886
34.0	0.8313960898743826	-0.040694653610628316
34.0	0.2801866109916755	0.7487474054282663
34.0	-0.983427316306751	1.1799848281605505
35.0	0.8210161090922931	7.198542564876104
35.0	-2.74579257943706	-0.3633056859566489
35.0	-2.4333136541116267	-6.667836178196147
35.0	-2.1243950397018696	-7.837721506475086
35.0	6.482485164158291	7.670320805751755
36.0	0.8939546875316926	-1.5288425062383295
36.0	0.9873781697795968	-1.6062559167511026
36.0	1.2061726777507507	-1.4454285167965948
36.0	0.847222959879891	0.24761932573347778
36.0	-0.5078698309297861	1.777325306151543
36.0	-3.4268586640121814	2.555582307901032
37.0	-0.5846966697592891	1.7800280145923213
37.0	-3.097281289850008	0.37329042504655463
37.0	1.7364116078809764	-1.1456347645061367
37.0	1.9455663517283492	-1.007683675132744
38.0	2.295876608713406	-1.4547273263396174
38.0	2.2600840900655124	3.675350624183426
38.0	-4.555960698778918	-2.2206232978438103
39.0	-4.931487661914711	-1.4454763257584942
39.0	1.3306003481621373	-3.676846942919956
39.0	3.600887313752588	5.122323268678446
40.0	-2.772026509943538	2.3506112094724054
40.0	-1.6486561893648535	-1.2727277885449626
40.0	1.4674860521282191	-2.7507451706168817
40.0	3.8980021197373036	-0.7578530679934364
40.0	-0.9448054725571274	2.4307148176828184
41.0	-3.8486954575485375	-5.479950665693543
41.0	5.871210077100662	-3.7387332057007594
41.0	0.5709131846088099	4.539630026654139
41.0	-2.593427804160933	4.679053844740179
42.0	-1.5060199687247915	1.0048730908122883
42.0	-1.4674133810445236	0.5889578881912385
42.0	0.5128213919320591	-1.384430346827099
42.0	2.4487087252563717	-1.695533853946812
42.0	0.011903232580860443	1.486133221770405
43.0	-1.443334790657576	-12.114489703257679
43.0	5.2841022184199895	11.701547331789458
43.0	5.283017140300585	12.017127955753761
43.0	4.786583047064279	13.418075945170777
43.0	-7.395585718311903	-11.939431704267413
43.0	-6.514781896815379	-13.082829825188904
44.0	-1.8435261315401057	-1.392266815541184
44.0	2.5078143597783504	0.3367842253380286
44.0	1.9551773390472287	2.109906849636539
44.0	-2.619465567285473	-1.054424259433384
45.0	-1.0036539412794228	2.3410967974500436
45.0	1.3476186804847592	-4.0200989722700085
45.0	-0.3439647392053379	1.679002174819979
46.0	4.626536607803333	-1.0712240985273564
46.0	-2.5178934665964876	5.533311538851215
46.0	-5.200575596551813	-2.7653265447358994
46.0	3.0919324553449776	-1.6967608955879852
47.0	-1.972506520008711	-1.5622062440059086
47.0	1.3183511558198746	-0.9295280868279032
47.0	1.6661514553623986	-0.4652682047820964
47.0	-1.0119960911735502	2.957002535615898
48.0	-0.05510152282517839	-0.13583914674054068
48.0	0.07159586278714046	-0.006891838275639244
48.0	-0.016494339961940222	0.14273098501614262
49.0	-0.04041650980701485	-0.12852111834009566
49.0	0.048938239669795255	-0.06534446268535211
49.0	-0.008521729862780407	0.1938655810254478
50.0	3.936292348975224	8.50583380696397
50.0	-5.351948980042407	0.024301811534945605
50.0	-2.027427304653741	-6.717600117440234
50.0	-1.641258881460339	-6.715265736529564
50.0	5.084342817181264	4.902730235470889
51.0	-5.930365409163222	2.9885164303781933
51.0	2.479863189709329	-4.706935728071316
51.0	3.450502219453887	1.718419297693091
52.0	0.6886027614664963	0.21261305149999568
52.0	-0.11889989752214243	0.12058641675465227
52.0	-0.5697028639443539	-0.333199468254648
53.0	6.464164005660507	1.814422716811717
53.0	3.965993600115148	7.2966091216017865
53.0	-0.8021862772738751	7.73965877042081
53.0	-4.978055003650674	-3.3721036365586112
53.0	-5.081157279451646	-6.066081758801444
53.0	0.4312409546004796	-7.412505213474217
54.0	0.005134489265019717	-0.00024284181386367983
54.0	-0.001893002707527576	0.0015402016824738543
54.0	-0.0032414865574906687	-0.0012973598686111677
55.0	-3.858966975152892	-0.061427370089928005
55.0	1.152820417062096	-3.0523369182757967
55.0	6.4061164614653485	0.7289070497893086
55.0	-3.699969903374553	2.384857238576416
56.0	-9.892589750384293	-5.234912105063036
56.0	-9.508792448450462	-6.000644611560371
56.0	0.9355619882804922	-2.5829699780390434
56.0	14.65349290416781	4.347657352036018
56.0	13.394490283682666	12.852227859973107
56.0	-9.582162977296232	-3.381358517346681
57.0	0.4484031056053797	-2.5633420135365
57.0	2.2452292032977166	-2.4846692277956444
57.0	-1.50658024085939	3.3394328416031724
57.0	-1.1870520680437058	1.7085783997289683
58.0	-0.2475264465625568	-6.3963615580216215
58.0	1.5475807131898076	1.9497584133951695
58.0	-0.08684523355486329	4.559637540283684
58.0	-0.31000257307286877	4.684713514017587
58.0	-0.9032064599995101	-4.797747909674777
59.0	4.821694601737787	-0.607238466976249
59.0	5.141364594820689	1.7119543028273285
59.0	-9.96305919655848	-1.1047158358510798
60.0	-0.2794074957375152	1.0121317657043865
60.0	-0.771320527805029	0.16935562368134868
60.0	-0.7958689202014216	0.08632964823720055
60.0	0.09512812348298592	-0.9339329782649481
60.0	1.7514688202609459	-0.3338840593579573
61.0	0.6495418453596756	0.4720097276493974
61.0	-1.6105339141347366	-0.33154618142845144
61.0	0.9609920687750704	-0.1404635462209588
62.0	-0.7982826470595435	-3.032391053524728
62.0	0.3351996176307147	-2.1984695405649837
62.0	4.872485827116833	2.9674278613222467
62.0	-4.409402797688014	2.263432732767491
63.0	0.04473365494595967	-1.4071764465930232
63.0	1.9842293481185884	0.18184001723563034
63.0	-2.028963003064547	1.2253364293574072
64.0	0.6222594906676472	0.1466508073303412
64.0	0.2950973463425197	0.2830728718822156
64.0	-0.78687217374603	0.08879644020033636
64.0	-0.7761815445534813	-0.48826920018060144
64.0	0.6456968812893185	-0.030250919232278115
65.0	2.9937422866137013	-1.7016901619319516
65.0	-2.4561220934932972	2.0630740908209604
65.0	-2.4581721954069473	2.035952911191931
65.0	1.9205520022865248	-2.3973368400809787
66.0	-4.70891185731824	2.713990027360168
66.0	-6.0716840116279895	0.6070496882641101
66.0	-4.610967183740886	-1.522514876760748
66.0	-3.4324387533029497	-2.5118184744050276
66.0	18.824001805990036	0.7132936355415105
67.0	8.71199390029204	0.4156860915640281
67.0	9.485622229525152	4.698045442540121
67.0	-4.451672743499382	3.5759546665851207
67.0	-5.538994497935826	2.366658373614483
67.0	-6.605130549394026	-1.5766347509831844
67.0	-1.7450480195821787	-4.993966436731827
67.0	0.14322968059425353	-4.485743386588741
68.0	-4.683337820132155	-6.836065179699328
68.0	5.699955619513431	-1.9106780889687143
68.0	4.147595872742398	2.3480335706266087
68.0	0.8297613135373995	4.152283581322413
68.0	-5.993974985661073	2.246426116718998
69.0	0.537951345016391	-2.6320029504531517
69.0	5.683524796244853	-1.3238484607970562
69.0	-6.221476141261252	3.9558514112502356
70.0	4.831221560313976	-3.5067055553902353
70.0	4.0974506800086115	1.3612061933322819
70.0	-2.935017477888978	3.830588802956382
70.0	-5.993654762433616	-1.6850894408984425
71.0	2.514100934130997	-9.144951257773428
71.0	2.2107287384106042	2.2119347735667283
71.0	-0.11532098717909396	3.32716743280487
71.0	-4.609508685362507	3.605849051401807
72.0	4.5598839206057535	-8.359233686574528
72.0	-2.737553362025347	10.543983102799269
72.0	-5.820393781277375	11.949264009369472
72.0	-0.38981177983441806	-5.512698261645245
72.0	4.387875002531392	-8.621315163948973
73.0	0.8061779773386886	-0.14661192052500877
73.0	0.3703366963599064	0.32596284752002636
73.0	-0.791094168204202	0.024335352659787982
73.0	-0.38542050549439655	-0.20368627965482108
74.0	2.4298571538762457	2.529185610746351
74.0	0.11276548671548199	2.7302885372119223
74.0	-3.3574805498137636	-1.225961493578394
74.0	0.8148579092220207	-4.033512654379879
75.0	0.686736691330854	-0.5889444369101933
75.0	1.4813982143658075	0.5409283888165909
75.0	-1.0650450316132358	0.17526050296832704
75.0	-1.1030898740834805	-0.12724445487474026
76.0	-0.3144122229325013	1.629388756468205
76.0	-1.7221465220016587	-1.8596261429614254
76.0	1.1700149400246795	-1.9981026836003084
76.0	0.8665438049094805	2.2283400700935285
77.0	-6.632672925343418	0.8117208602867211
77.0	0.6336681150254946	-5.125181829642118
77.0	3.6584100224007936	-1.9553171847512958
77.0	3.2191763579743164	2.480425132103663
77.0	-0.8785815700571894	3.788353022003032
78.0	-6.3007802218198785	0.29657922807163645
78.0	-2.3559273408583135	-5.184342405243793
78.0	5.657465492315749	0.1925800061782271
78.0	2.9992420703624436	4.695183170993929
79.0	-3.417003490916125	3.3447172557231317
79.0	0.47668725979309107	-2.1353317254943587
79.0	2.940316231123036	-1.2093855302287662
80.0	-1.0580155895205	2.0116143611748356
80.0	0.2864237950436309	-1.1291704488682972
80.0	0.7715917944768766	-0.8824439123065695
81.0	0.4694632445391361	1.1143327546583501
81.0	-0.7999827444099342	1.3145718873710714
81.0	-0.6775149796583433	-1.2958881817294088
81.0	1.0080344795291567	-1.1330164603000163
82.0	-5.171974590944381	-4.551977266831294
82.0	7.229634622643089	0.5711922971218619
82.0	3.915358837217185	3.0874592991603147
82.0	-2.114737904403136	1.7993662907182169
82.0	-3.8582809645127605	-0.9060406201691098
83.0	0.4022540880158794	1.245406172379587
83.0	-1.8355797813077206	3.114289728952423
83.0	0.5006013168487805	-2.112080375920364
83.0	0.9327243764430541	-2.2476155254116437
84.0	-1.533483157658132	6.9560777019218305
84.0	-6.041868267648301	-1.833970441600894
84.0	0.5229787253500102	-8.2473437017991
84.0	4.153737044894882	-3.4151610582693004
84.0	4.086425105473718	-0.387845202139086
84.0	-1.1877894504121538	6.928242701886536
85.0	0.9583284076816376	-0.9231463833231424
85.0	-0.08756366487793878	0.5518317182686046
85.0	-0.4931391796877029	0.2986277808210111
85.0	-0.37762556311597706	0.0726868842335012
86.0	4.8134761497411045	3.6217731881022663
86.0	1.927573037581529	4.711837169151513
86.0	-6.741049187322652	-8.333610357253788
87.0	8.535170133004174	6.183593015704863
87.0	-3.448037860745711	3.7697611571115024
87.0	-12.975982645733756	-0.041139684617940875
87.0	-11.71108329168195	-5.132250095574939
87.0	8.73982346592982	-7.400816267661891
87.0	10.860110199227416	2.6208518750383707
88.0	0.7118525584321663	-0.23342864611361389
88.0	-0.6882851778089328	0.8367127837559559
88.0	-0.7199240454035545	0.7350141889188079
88.0	0.6963566647803253	-1.3382983265611654
89.0	-1.1491610287456016	1.7303953819367643
89.0	-0.5873169428999704	-1.582992122990091
89.0	1.7364779716455931	-0.14740325894667727
90.0	-1.3947992457239908	-0.23769996656131204
90.0	-0.3323612560882847	-0.6710672937376786
90.0	0.22218180369573443	-0.5765153498489202
90.0	1.504978698116516	1.4852826101479046
91.0	-3.1202712692987697	3.2719888603534484
91.0	-3.4383777833441087	-0.5723951032443787
91.0	3.230962538301016	-1.8331414721400172
91.0	3.32768651434185	-0.8664522849690626
92.0	-0.7228299372947299	0.7580626713560052
92.0	-1.3305054789978101	-0.07341642513432856
92.0	1.108537835485684	-0.6544973056303569
92.0	0.9447975808068612	-0.03014894059129446
93.0	-11.295398187356058	-0.2594151508697059
93.0	-1.9543747262915139	-7.809236520837178
93.0	10.148835658256893	-1.487280674733108
93.0	9.827929982784257	1.8711922877845197
93.0	4.163912145635432	6.173014283049484
93.0	-10.890904873029024	1.511725775606022
94.0	1.0993670318834825	-0.882759653268016
94.0	1.3074419849930978	-0.7631414775332921
94.0	0.3011545067902136	1.807015788275592
94.0	-1.5483475869483172	0.33588403070832984
94.0	-1.1596159367184642	-0.49699868818262044
95.0	1.363855917611655	-4.40483968471376
95.0	1.923296855055935	1.612654772776181
95.0	-3.2871527726675844	2.7921849119375746
96.0	-0.40284955419153695	-0.8026040302647827
96.0	0.8574810348344662	0.15052683160123984
96.0	-0.4546314806429369	0.6520771986635614
97.0	5.076758403934598	2.20576329147098
97.0	2.893173263806474	2.218697983605728
97.0	-5.475333438271925	0.3869799854926732
97.0	-2.494598229469161	-4.811441260569375
98.0	1.5825891464173212	-1.605671559905405
98.0	-0.08643524358252637	0.8410879303677492
98.0	-0.6238985808721971	1.5207422747589545
98.0	-0.9284536074854972	1.355535549803305
98.0	0.056198285522886804	-2.1116941950245964
99.0	2.825430006548336	-0.23438215105205423
99.0	2.7059693902823603	0.8315212308695816
99.0	-0.7156316027891062	2.4803920726648165
99.0	-2.3239663514279973	0.4775425970587122
99.0	-2.4918014426135935	-3.555073749541078
100.0	-2.712832405232529	-3.843495799934301
100.0	3.20698839275497	-5.053013942534608
100.0	4.456198301860736	-3.981064947315834
100.0	-0.22819146271819	8.229195352958588
100.0	-4.722162826664988	4.648379336826175
101.0	5.81619193047874	8.159330034646581
101.0	4.978816293642258	7.9647927174226965
101.0	-3.4191456710663246	4.381803791822874
101.0	-6.70601380895526	-13.05599699702536
101.0	-6.051496402872633	-14.063022033512503
101.0	5.381647658773203	6.613092486645691
102.0	4.150095254485272	-1.792702987463499
102.0	-1.5855887425650803	3.183933438012914
102.0	-2.564506511920189	-1.391230450549414
103.0	-0.9652647537893785	1.571150410107118
103.0	-1.131477882507739	1.6169645755525965
103.0	-1.5607849677658974	-0.1415204950427542
103.0	-1.5302964854538066	-0.5612054061690568
103.0	-1.4856583245540989	-0.6294401718148599
103.0	6.673482414070916	-1.85594891263303
104.0	3.0954439839128023	-2.592330005775799
104.0	2.284786735073457	7.144909761657303
104.0	1.3131212501412497	7.258478904269716
104.0	-4.331078007761718	-2.816828885025311
104.0	-2.3622739613658306	-8.994229775125877
105.0	-0.14186326512522554	-0.8095708639116677
105.0	0.6116712621005191	-0.16926421688429238
105.0	-0.469807996975308	0.9788350807959576
106.0	2.324462641283097	-1.4664014815979416
106.0	-1.3387984747251942	3.0282666911318183
106.0	-1.5123094661188312	2.604966787852969
106.0	-0.3507914910113538	-1.5632498737609999
106.0	0.8774367905722823	-2.6035821236258467
107.0	0.9477097982581123	-1.4238314469642375
107.0	0.7673253721465427	3.785593966887916
107.0	-0.9626206143999811	-0.17114981598438597
107.0	-0.7524145560046784	-2.190612703939287
108.0	-0.4514573781042988	-1.8279583103121544
108.0	0.7542096669383571	0.9185288116666754
108.0	0.42156846006282195	1.0030331472266831
108.0	-0.7243207488968841	-0.09360364858121788
109.0	3.723313374838138	-0.5591734394594999
109.0	2.883263295853277	0.19267371903443495
109.0	-3.261923253060926	0.8062106296534457
109.0	-2.446866544960806	-0.029201147908905014
109.0	-0.8977868726696928	-0.410509761319474
110.0	-1.0164978941120881	-1.222420505114906
110.0	1.6118807739757532	-0.7269591562428017
110.0	0.8876152581754528	0.5717887182433155
110.0	-1.4829981380391228	1.377590943114392
111.0	-0.4128783351517843	-0.7249019802969655
111.0	0.8456595564653436	-0.6612805741391267
111.0	0.06441547219589701	1.1712431134794217
111.0	-0.497196693509457	0.21493944095664097
112.0	0.09001936209548028	0.14901100365203862
112.0	-0.2603832501722169	-0.17094782899199537
112.0	0.17036388807674277	0.02193682533995323
113.0	0.03042907815088565	-0.029386923321241883
113.0	-0.000553713883957211	0.01954472871086981
113.0	-0.029875364266914	0.009842194610365446
114.0	1.547355285212553	-1.4878955178493127
114.0	1.6072852277304328	-1.0674567290610597
114.0	0.6238013749761148	1.1851720298774837
114.0	-2.699913958489506	2.016879690713021
114.0	-1.0785279294296373	-0.6466994736801813
115.0	-0.6595494172916424	-0.12137721011077171
115.0	0.37898332499712356	-0.7115250572311732
115.0	0.2805660922945052	0.8329022673419709
116.0	3.2568166583854112	1.2323704831949804
116.0	-2.5872961827254897	2.0944447758132045
116.0	-0.6695204756599133	-3.3268152590082134
117.0	-2.158080497275645	4.425543785588505
117.0	-4.380472689038487	2.7318288378632802
117.0	4.07610824790956	-7.102747756962637
117.0	2.46244493840456	-0.054624866489155925
118.0	0.5220053847785462	-1.8614487097926535
118.0	1.7158909138167342	-1.2060437655538958
118.0	4.127346029305819	2.2998966002837347
118.0	0.34030019171695897	2.757960037701378
118.0	-6.705542519618048	-1.9903641626384811
119.0	0.4071656477405499	1.6867378926067509
119.0	-2.4119299353661376	-1.0877193811389496
119.0	2.0047642876255845	-0.5990185114678073
120.0	1.1968109619956966	1.5913156702980196
120.0	-0.6566757774670323	-0.7094406025484883
120.0	-0.540135184528664	-0.8818750677495454
121.0	7.15636596950155	-6.517311601713206
121.0	9.750232301188003	-0.7267114105953033
121.0	0.7717825615902786	5.294614515003547
121.0	-5.940007484812477	4.854312375809218
121.0	-5.983809339708151	4.381395728801962
121.0	-4.08076841932144	-3.211311871416408
121.0	-1.673795588437774	-4.074987735889839
122.0	4.36664027657895	-1.2656202415444449
122.0	2.880973049073062	0.7394578954683578
122.0	-5.210673469076512	3.1743106435273543
122.0	-2.036939856575517	-2.648148297451266
123.0	0.873334684563782	-0.25262838511055435
123.0	-0.5660580872977112	0.4920383433932504
123.0	-0.30727659726604417	-0.23940995828266198
124.0	1.2716753117312773	1.2718596321170672
124.0	-0.2083193755677277	1.4730766736170264
124.0	-1.5360249151769132	-1.37670937518201
124.0	0.4726689790133756	-1.368226930552094
125.0	0.19167132726371797	-7.9178112851314015
125.0	5.523609376187627	9.822341927243782
125.0	1.1481009037216872	9.920647518243053
125.0	-4.797101972628793	-2.9518633014737587
125.0	-2.0662796345442347	-8.873314858881688
126.0	-0.9153026632651258	1.6709821055374094
126.0	0.18101079796605846	-2.421553462771412
126.0	0.7342918652991043	0.7505713572339815
127.0	0.6771614878139669	2.8241612747558795
127.0	-1.0705143628380516	0.7577358698062542
127.0	-1.2599212695767097	-0.1977091171414158
127.0	0.028029551648158877	-1.8764098785369667
127.0	1.6252445929526114	-1.507778148883742
128.0	3.996944596339325	-0.8921401864299862
128.0	-5.066110393659405	5.279011512662757
128.0	-2.0780737761298282	-1.849755710781581
128.0	3.1472395734498977	-2.537115615451201
129.0	0.0862333098976895	0.20380898784280768
129.0	-0.23929109138913068	-0.03191488950448058
129.0	0.15305778149143953	-0.17189409833832395
130.0	0.37599799408892237	-0.8483072870187218
130.0	-0.13515524745196103	0.6530008482878744
130.0	-0.24084274663697436	0.19530643873085313
131.0	8.392943900825701	4.610173910796536
131.0	2.4509503265534054	6.613657064753833
131.0	-5.836257192723858	0.3750023997803553
131.0	-3.1210878767065857	-5.703520434245273
131.0	-1.8865491579486633	-5.89531294108545
132.0	0.8163539650803707	-0.5461299796057911
132.0	0.7565927306758271	1.0342270355310235
132.0	-1.804687132138752	1.1812102074235615
132.0	0.23174043638252412	-1.6693072633488206
133.0	0.5439933232605091	-0.009342874144771638
133.0	-0.7075720866415397	0.1106954527008615
133.0	-0.371634804960958	-0.03797304880343356
133.0	0.5352135683419805	-0.06337952975264453
134.0	-4.894455999480931	2.9878626011627114
134.0	-5.642573248741858	-2.597605081549888
134.0	5.555152436405455	-5.44105035990075
134.0	4.981876811817334	5.050792840287926
135.0	-1.1135678068404153	1.4044845421082128
135.0	-2.368364155303883	1.2291948992825015
135.0	-2.2545558957509484	-2.7504767772207903
135.0	5.73648785789526	0.11679733583011208
136.0	-1.2305567249936091	6.770586845848155
136.0	-4.955210708053491	-9.136847971902805
136.0	-5.420882098900047	-14.221920551044482
136.0	5.333993604206279	-1.944500831284035
136.0	5.29781718399213	5.2702310021967715
136.0	2.1423736580173585	6.328713439927936
136.0	-1.167534914268589	6.933738066258498
137.0	-3.054610923494308	-2.2506225575490464
137.0	-2.9825363494221717	-2.3479345428137273
137.0	2.9757993505092046	0.8444052971441711
137.0	2.8011436049072174	2.0995136725486807
137.0	0.2602043175000421	1.6546381306699245
138.0	-0.15181170660794552	2.19711730782805
138.0	-2.417752650151458	0.18278209194853834
138.0	-0.568418599383301	-4.4239738436355145
138.0	2.61359681018603	-0.6735464336960084
138.0	0.5243861459566742	2.717620877554934
139.0	4.802670656731067	-0.6507387523084426
139.0	-4.783610644054082	2.6374481531278016
139.0	-4.82913889363546	-1.2159307265100643
139.0	4.810078880958497	-0.7707786743092984
140.0	4.046664373326603	-2.519176278827378
140.0	-7.104997525815819	8.993509879924288
140.0	-6.892617305313713	7.511823680303466
140.0	4.336170811163911	-7.863150205066555
140.0	5.6147796466390325	-6.12300707633378
141.0	1.1331842001742323	2.753016068357641
141.0	-5.472144077270437	3.433969719096272
141.0	4.338959877096199	-6.186985787453886
142.0	-5.88996297854613	7.663842482010532
142.0	-10.215380414087992	5.229534398164826
142.0	5.0535825789765205	-8.005949485778338
142.0	6.802748918038345	-6.0212845548077585
142.0	4.249011895619233	1.1338571604107268
143.0	-5.271124469471456	-0.17220081656618816
143.0	3.7480661969913727	-0.7090584628284625
143.0	1.5230582724800736	0.8812592793946238
144.0	-0.2697544149496161	0.16310927661377625
144.0	-0.4518356842340458	-0.18668507034108628
144.0	0.7215900991836761	0.02357579372731709
145.0	-0.809234223317689	0.929419453433146
145.0	-0.02284676008126912	-1.6706525521531357
145.0	0.8320809833989561	0.7412330987199967
146.0	5.031632871140155	5.263965249065607
146.0	-1.6397322174231606	3.9964452037150924
146.0	-6.819861891655445	0.3124019463147582
146.0	-7.929530470709283	-3.4930676570787713
146.0	-3.10456890797578	-5.84160742022375
146.0	4.639295031143169	-2.827064406329199
146.0	4.674751069332717	-2.688589055480449
146.0	5.148014516147672	5.27751614001673
147.0	1.7686985416095748	0.09525380794319045
147.0	-0.7410028384010684	0.6883285860505239
147.0	-0.9130641665167407	0.058417287806570246
147.0	-0.11463153669178622	-0.8419996818002755
148.0	0.21210401620139882	0.2581366870570656
148.0	-0.29028501548791985	0.6569831701440821
148.0	-0.3691784329784849	-0.025935045330650885
148.0	0.4473594322649989	-0.8891848118705041
149.0	3.200923251957594	0.23832805150046985
149.0	-5.122715541554217	1.962190030528743
149.0	-3.224584633823505	-0.5170748171738785
149.0	5.146376923420096	-1.683443264855375
150.0	0.036185319749904354	-0.7357071220773047
150.0	0.6135541528245816	-0.11028856409893145
150.0	-0.649739472574485	0.8459956861762161
151.0	0.3109024682334551	-3.124931129542403
151.0	0.9597277212353799	2.7491904895525052
151.0	0.41728399629860247	3.0111946095035247
151.0	-1.6879141857674376	-2.6354539695136365
152.0	0.7525668086964968	-1.037265136826744
152.0	0.3294859179099228	1.0305436250715267
152.0	-1.0820527266064317	0.006721511755224864
153.0	-0.720916708987419	2.659083219805477
153.0	0.053314425172249685	-2.193179759858238
153.0	0.8222835614494236	-2.3883917637149543
153.0	-0.15468127763425327	1.9224883037677583
154.0	-0.457380514847884	0.8993621800961411
154.0	0.07437544927488039	-1.0621014444094012
154.0	0.3830050655729896	0.16273926431325755
155.0	2.1118413147188746	-2.7304509146396376
155.0	0.18439818398709498	1.7866583020210844
155.0	-2.18596339859908	3.6700276176458617
155.0	-0.11027610010688225	-2.726235005027278
156.0	2.470268525310544	2.2697838719718115
156.0	-2.6902355439990835	0.314013511391188
156.0	-1.5015988937320937	-1.588375916566796
156.0	1.721565912420628	-0.9954214667962126
157.0	-0.24999488525581517	-1.1829486458625669
157.0	2.634064960649116	1.9335525171087078
157.0	-1.679097571276538	0.3114990797341315
157.0	-0.7049725041167763	-1.0621029509803055
158.0	0.9159715780402422	-1.7006547950374022
158.0	-0.3428022756146379	2.649328823411973
158.0	-0.3573566229023595	2.6495325334808806
158.0	-0.4512371165708332	1.2806001786919397
158.0	-0.16698322328669993	-2.583115527729096
158.0	0.40240766033431713	-2.295691212818346
159.0	1.0837992838935095	0.08711881768754756
159.0	-1.319745225992085	0.20756005271896796
159.0	-1.462875100608204	0.16630061366099802
159.0	0.6089860915175812	-0.5442461693209216
159.0	1.0898349511892	0.08326668525340522
160.0	0.1514104492826502	1.0463339545292991
160.0	-0.5626790182300473	-0.5076619574326406
160.0	0.41126856894741026	-0.538671997096653
161.0	0.2127619273049712	0.27070562173755147
161.0	-0.13049040584915955	0.31282255568773804
161.0	-0.08227152145582503	-0.583528177425273
162.0	-1.687275855817676	-1.7000146793344675
162.0	-0.05060676191122083	-5.440834558354027
162.0	1.0140539096816943	3.5528539689278524
162.0	0.7238287080471869	3.5879952687606447
163.0	0.19324710649555674	-0.01032966562717084
163.0	0.2690272245277228	0.35272856124499735
163.0	-0.23318428215990128	-0.07869609211130858
163.0	-0.22909004886339268	-0.26370280350652064
164.0	-2.3323603860454516	-1.1253589337098509
164.0	-0.2905774333467585	-2.814139604980014
164.0	1.107984037033422	-2.427051524648631
164.0	1.6978549649495593	2.165621944004536
164.0	-0.18290118259080174	4.20092811933395
165.0	-0.02135992526249912	-0.2002694503668793
165.0	0.06664623297312995	-0.004515347796391241
165.0	-0.045286307710630885	0.2047847981633023
166.0	0.5147382110565504	-2.997493647304413
166.0	1.3262516195154066	1.6605609528624743
166.0	0.10025007001826215	1.3006811017734101
166.0	-1.9412399005901955	0.03625159266850742
167.0	-0.010437643328491501	0.021415387181921323
167.0	-0.024606316220643507	0.0171980676039803
167.0	0.03504395954913146	-0.03861345478591539
168.0	3.258593931092978	0.16374669453906185
168.0	3.2733603163854355	0.4962950676179683
168.0	-0.5335111387872751	3.7086554085774557
168.0	-2.6669722917399428	1.904677607724482
168.0	-1.960973023998911	-1.556110812972294
168.0	-1.6966720818774923	-1.8792261475476737
168.0	0.3261742889252507	-2.8380378179390706
169.0	5.435712772072041	-7.134704916088774
169.0	-0.6569634063275179	5.449885818409374
169.0	-1.0824172005401547	5.366461591804406
169.0	-3.6963321652043244	-3.681642494124987
170.0	0.10957117455435975	-0.6294084985449367
170.0	0.025724238256238173	0.7160801116232014
170.0	-0.22995665698031728	0.538303348748176
170.0	0.09466124416971905	-0.6249749618264507
171.0	0.29231371914570664	-1.7074824595058018
171.0	1.4963178064375415	-2.5372949725408915
171.0	0.2728177307235344	1.3838558573176112
171.0	-0.8979635103924971	1.4992811428490862
171.0	-1.1634857459142687	1.3616404318799646
172.0	2.89664958108501	-4.319763808384234
172.0	3.9267762616623254	-0.9487631228578988
172.0	-2.9610050838064144	3.029281777139219
172.0	-3.8624207589409205	2.2392451541029144
173.0	0.1405338063277736	1.0270474821092352
173.0	-0.8382966619348522	-0.5154574454258036
173.0	0.6977628556070627	-0.5115900366834328
174.0	-0.017125958398214878	0.03540416509237927
174.0	0.014903018331851021	-0.08463054889701677
174.0	0.00222294006636772	0.04922638380462382
175.0	-0.019145797657227286	-0.7712043154793597
175.0	1.4511358387340336	0.9147552497929394
175.0	-1.4319900410767932	-0.14355093431358545
176.0	-0.35201016127406387	-0.07972844705818367
176.0	-0.018812893822934523	-0.23350560632534476
176.0	0.3708230550970188	0.3132340533835482
177.0	-1.5912583547023396	-9.528452997470673
177.0	19.661694185184007	8.392188378816408
177.0	-7.618191180822636	1.5483781988652785
177.0	-10.452244649659052	-0.4121135802110154
178.0	5.498936763739252	-0.6998892246050689
178.0	4.113110245867711	2.425131020028468
178.0	-4.223743327484701	0.6019885562632465
178.0	-5.388303682122261	-2.3272303516866453
179.0	0.08823796518074419	-3.8277951757580877
179.0	1.6480473068847952	-2.864992937415854
179.0	2.3102331128283233	3.2779583446501745
179.0	-2.4048717393742782	6.402384718035074
179.0	-1.6416466455195844	-2.9875549495113067
180.0	-2.7360997652877845	-2.007140254056123
180.0	3.6278581257481286	-0.9199075800948757
180.0	-0.891758360460345	2.927047834150983
181.0	5.294621545193107	-0.3604316827807816
181.0	-1.2076033354620297	3.1016822943400326
181.0	-4.087018209731109	-2.7412506115592503
182.0	-5.014587202272973	12.242267385825123
182.0	-6.001807731880099	6.4730427932951144
182.0	-1.871635676130059	-10.378832828594202
182.0	3.846664080902913	-7.817927355613955
182.0	5.008607105541951	-5.185579055126207
182.0	4.032759423838266	4.66702906021413
183.0	-3.156199795757357	1.3911794510233264
183.0	-1.7110295763521408	-0.8720989301484386
183.0	3.2727769431008165	-3.4634358674699715
183.0	1.5944524290087003	2.9443553465950627
184.0	4.357533874354658	8.954440843186752
184.0	-8.946835726090507	-3.955029792641227
184.0	-9.058963851922499	-5.337337759714126
184.0	-0.020374082199595803	-6.006344430527108
184.0	7.602268528532459	-2.2647969406575212
184.0	6.066371257325526	8.609068080353218
185.0	-1.7206981795415723	-0.9934830986546117
185.0	1.7181600965042687	0.11728200189318927
185.0	1.537698340674738	0.24425706250119356
185.0	-1.5351602576374428	0.631944034260182
186.0	0.4252562698312194	-0.28771649651556996
186.0	-0.5986353758704211	1.0210122033531237
186.0	-0.3463152975775335	-0.18167483222811326
186.0	0.5196944036167027	-0.5516208746093918
187.0	0.8354783331523808	0.17378578109095133
187.0	-0.2833739221753837	0.3220127567766999
187.0	-0.40221490537610816	-0.20890863446827995
187.0	-0.1498895056008889	-0.28688990339938547
188.0	1.5916865818875174	-1.3132762438650116
188.0	-0.13531307730908726	2.2829353862819137
188.0	-0.885047662089842	2.1390186215095333
188.0	-0.5713258424885856	-3.1086777639264422
189.0	1.527953296331892	9.041502105038468
189.0	-10.061733402468976	3.714545406245512
189.0	-17.664274004853077	-5.011880344883951
189.0	-8.358519182485589	-6.5866216132768995
189.0	13.580174126603664	-2.414788387081521
189.0	20.976399166872053	1.257242833958423
190.0	-0.22552334807946048	0.1328224847489947
190.0	0.4058747062232239	-0.590533278477502
190.0	0.07704307610836575	0.2593047455630268
190.0	-0.2573944342521196	0.19840604816544638
191.0	3.379767807411907	1.2662660109393522
191.0	-2.1330237539870516	3.1673714540358966
191.0	-1.3742455328071788	-2.1379743419164465
191.0	0.12750147938233747	-2.2956631230588043
192.0	-0.24473268639069484	-0.26564516641749586
192.0	0.4325988314161514	0.20264886330894955
192.0	-0.18786614502545657	0.06299630310854629
193.0	-1.277402738720782	-0.5803762846160442
193.0	-1.1808774103330284	-1.047907351205559
193.0	2.443206434815527	0.5311822952450905
193.0	0.015073714238270587	1.0971013405765033
194.0	0.9716548731141359	-1.7110427948907907
194.0	0.3742840543823679	2.2253625330502764
194.0	-2.1405380681166233	1.1789896628358327
194.0	0.7945991406201333	-1.6933094009953107
195.0	0.7765301647957589	0.04803798809192175
195.0	-0.635553603594523	2.0195256458995448
195.0	-1.1737863683950918	-0.31943366524421474
195.0	1.0328098071938367	-1.748129968747261
196.0	-0.4461796620794851	0.6080947401755088
196.0	0.07866093941082339	-0.7617160273522824
196.0	0.6599172351995622	-0.5980008676362806
196.0	-0.29239851253089527	0.7516221548130253
197.0	1.7322610040117892	-3.3941502688091334
197.0	1.4028084602402187	2.455329663681786
197.0	-3.1350694642520076	0.9388206051273439
198.0	0.01443953089284698	0.03648587061194621
198.0	0.009180168914711484	0.0413097073107774
198.0	-0.023619699807558462	-0.07779557792272362
199.0	-1.0639095574694284	1.2012194443108803
199.0	-1.7141160492417624	-0.11295642865074712
199.0	-0.9804800106224999	-0.9231534044841372
199.0	3.7585056173336917	-0.16510961117599665
200.0	-4.151312802350521	7.75281780794219
200.0	-1.8471563151807577	-3.8838987085744705
200.0	-0.3925075123757789	-4.5711449860911175
200.0	6.390976629907051	0.702225886723402
201.0	-0.9135411698219046	3.31229693175749
201.0	-0.719865912759737	-3.860422275447422
201.0	1.633407082581654	0.5481253436899247
202.0	3.0998859116317368	-1.6090650058275915
202.0	-1.2332252270364041	3.467445733967693
202.0	-1.8666606845953297	-1.8583807281400855
203.0	2.7574699038390866	1.6033413503743144
203.0	-4.954224381518379	5.515636829314974
203.0	-2.142346631810726	-3.407371661549155
203.0	4.339101109490031	-3.711606518140148
204.0	-0.4664828661957247	4.225162966905162
204.0	-3.9049565217500013	5.4292754051797365
204.0	-11.657990563002796	1.5985670316284488
204.0	7.99958381071684	-5.635999113680789
204.0	8.029846140231669	-5.6170062900325295
205.0	1.2925397558212288	-2.1297346251423726
205.0	1.8186995623690747	-1.8977609439389644
205.0	-0.6036689711287208	1.789463784269459
205.0	-2.5075703470615895	2.2380317848118803
206.0	1.3038044685661478	-1.6727219317529978
206.0	3.0711801960963534	0.3328740690087714
206.0	-1.818049162496232	2.230739161318365
206.0	-2.556935502166261	-0.8908912985741506
207.0	0.2199189859467292	4.166351416167735
207.0	-2.1403464799526137	1.1961353531512082
207.0	0.6133714315617166	-2.50801675775467
207.0	1.3070560624441532	-2.8544700115642483
208.0	-1.2464593112937186	6.111656029721387
208.0	-7.32255431952933	-11.922206245230418
208.0	-0.9770181821841896	-5.934167855143339
208.0	4.7985142864191195	5.749952263298724
208.0	4.7475175265880365	5.994765807353626
209.0	-0.8087030012780635	-7.159359621097469
209.0	5.239722561162308	7.494539121247576
209.0	1.8812932396353488	8.135538828825565
209.0	-6.312312799519579	-8.47071832897564
210.0	-0.024804298952785377	-0.014717881409836788
210.0	0.01596296269867983	0.0020739863217615288
210.0	0.008841336254102944	0.01264389508806865
211.0	0.2135320355996389	-0.16261601128899275
211.0	0.27402963266419145	0.017193574920014842
211.0	0.23372139014075952	0.03586135471137864
211.0	-0.7212830584045955	0.10956108165761229
212.0	-3.003039322903754	3.217783394756952
212.0	-2.3828924567514154	-3.509716375595513
212.0	4.462979411071856	-4.1199516215798795
212.0	3.6197574493051214	1.1739086242637744
212.0	-2.6968050807218296	3.2379759781546675
213.0	5.013234864182171	2.0145816655694606
213.0	-4.016941539287714	2.4747498200637956
213.0	-5.447102083010477	2.2379228571277303
213.0	-6.171202737988152	-5.95200142566962
213.0	4.168047395529809	-1.774780112843259
213.0	6.453964100574406	0.9995271957519666
214.0	-0.09324017272774428	-1.3791970660072175
214.0	0.08950645950803396	-1.2624684972582363
214.0	0.18791993275832747	1.3622394697209144
214.0	-0.18418621953862124	1.279426093544524
215.0	-9.636453213576713	-3.2605411020977426
215.0	-8.99354058951782	-4.672491641363629
215.0	9.32451458007407	3.863677893125322
215.0	9.30547922302045	4.069354850336045
216.0	-6.735839842079094	4.703073725600375
216.0	-0.3214896190972633	-0.6792676476929105
216.0	7.057329461176349	-4.023806077907493
217.0	-7.145247393336834	1.3382428659126786
217.0	-6.678787719046245	0.7560087610680547
217.0	5.243930965473072	-4.365578367943032
217.0	8.580104146910001	2.271326740962317
218.0	3.3006134324628165	1.5770959224522287
218.0	-4.433190470261884	-0.4761779254380791
218.0	-4.433028062730067	-0.7798958292558366
218.0	5.5656051005291385	-0.3210221677582993
219.0	-3.1074595765669737	2.218757938484503
219.0	1.844997119133155	-1.797904326680252
219.0	1.2624624574338421	-0.4208536118042404
220.0	-2.0478094137713363	-3.747057521012915
220.0	3.109186317819044	3.822818808115599
220.0	2.9808371290100073	4.088152140861827
220.0	-1.9288216807381808	-0.37415748315624675
220.0	-2.1133923523195577	-3.7897559448082436
221.0	0.019521746998795986	-1.005348227456663
221.0	0.9360393367203447	-0.3106154742134162
221.0	-0.052055617866440716	0.7287284557995336
221.0	-0.9035054658526822	0.5872352458705193
222.0	-0.22954433151567735	1.1644019200673459
222.0	-0.07997950576488297	-0.7707399004277573
222.0	0.30952383728054467	-0.3936620196395861
223.0	6.637829025467495	5.8038832470432045
223.0	-12.900483176480167	-0.6513665112022313
223.0	-9.567456766156477	-4.843224960029566
223.0	7.888849349826554	-0.32124221901074507
223.0	7.941261567342599	0.011950443199288178
224.0	-0.7485581533724	0.8324685774478717
224.0	-2.6126915580798946	-2.5505856688218485
224.0	-2.5208776106146926	-2.6911516899505403
224.0	0.1922697823695008	-0.7902253193802247
224.0	2.527418913446364	1.4018471720869645
224.0	1.9869337767549093	1.7992858291882976
224.0	1.1755048494961657	1.9983610994294505
225.0	1.469583398557558	2.700256761911274
225.0	1.3857548616233057	3.025889556934635
225.0	-1.3168667292904739	2.932153144022961
225.0	-1.6838358522953727	-3.8449939212542854
225.0	-0.879473441494149	-3.804442368628622
225.0	1.0248377628991656	-1.0088631729859505
226.0	-0.07586912114166176	1.3149233015647852
226.0	-4.100810305743226	0.5829356384338849
226.0	-2.2897499003863198	-0.8235808460752434
226.0	6.46642932727122	-1.0742780939234082
227.0	-0.1381201225596556	1.4664389477809543
227.0	-0.5279297514014533	0.38588135369431514
227.0	0.30853310345447843	-0.9144075784092055
227.0	0.35751677050663955	-0.937912723066053
228.0	1.929711888807193	-2.785107060276496
228.0	-2.1781223169089903	5.362644810677512
228.0	0.24841042810180647	-2.577537750401012
229.0	-0.06305970214264126	-0.9136681718580691
229.0	1.023310348642014	-0.3252570110775137
229.0	0.5407982547565743	0.23953276190340556
229.0	-1.5010489012559534	0.9993924210321583
230.0	2.0657442446911194	-8.113210488400512
230.0	4.045336590359618	0.06695435536355242
230.0	-3.81436358012733	8.070943351570085
230.0	-4.148667299232114	7.744981206778653
230.0	1.8519500443087176	-7.769668425311769
231.0	3.178043730343537	-1.6330885125710581
231.0	-0.08643226782925383	2.9261434693810737
231.0	-2.287965940049056	2.99837933974899
231.0	-0.7985172436361445	-1.7763001205108828
231.0	-0.005128278829095791	-2.5151341760481274
232.0	-5.6034501172736455	-1.249793551526855
232.0	-5.803850859863447	-1.5633739004082454
232.0	6.8290291128344105	0.5272019361993989
232.0	4.578271864302681	2.2859655157356977
233.0	0.5204022178299814	0.9960842048066848
233.0	-1.08658637305428	0.4726424327696668
233.0	-0.7185775134598508	-0.8889806601012367
233.0	1.2847616686842005	-0.5797459774750902
234.0	-3.453187055689354	1.6630605374907612
234.0	2.1480972070588242	-2.448826106749288
234.0	4.434455405612339	-1.6311939645219147
234.0	-3.129365556981809	2.416959533780435
235.0	3.246480957940801	-12.216160518642424
235.0	3.5873740205696483	-12.035606287168138
235.0	-0.30547045105927306	5.432578738286554
235.0	-3.265574322997898	9.50013075588856
235.0	-3.2628102044532827	9.319057311635452
236.0	-0.7212129597529634	1.457230203889862
236.0	-1.4657179350245113	0.515204329682053
236.0	-0.33617261881917315	-4.197727069760324
236.0	2.962951660739527	0.5822922089753951
236.0	-0.43984814714288933	1.6430003272130147
237.0	0.796702778016102	-1.7953226408797494
237.0	1.3553343767198884	1.7672649491983632
237.0	-1.1165857219672222	1.6188573985508896
237.0	-1.0354514327687543	-1.5907997068694872
238.0	-1.7169167940939751	1.876257605330136
238.0	-1.1311755332359241	-0.23926131056196598
238.0	2.7685586690749378	-3.4187216379187517
238.0	0.07953365825496246	1.7817253431505795
239.0	3.437975978683907	10.600551563151457
239.0	-5.887990244751168	-9.683382835650786
239.0	0.28962525216566887	-3.5140242360759046
239.0	2.1603890139015793	2.5968555085752216
240.0	-0.4632725863287654	2.094069962406636
240.0	-0.5624476602588175	-0.7874992606176776
240.0	1.0257202465875805	-1.306570701788963
241.0	-2.3434416017613264	-1.6621694886237508
241.0	1.7619479915940846	-0.03651537095277481
241.0	1.6300835600996608	0.5867406261322536
241.0	-1.0485899499324154	1.111944233444278
242.0	2.0639734537226646	4.116951285814494
242.0	-3.130250266963918	-0.8476918202421884
242.0	-3.381098192240132	-3.6217681276700433
242.0	-3.138787067068166	-4.251626536785249
242.0	1.1394095405307545	-1.635419712976374
242.0	3.488115846150002	1.9020430518799178
242.0	2.958636685868789	4.337511859979471
243.0	5.751495208306585	1.055136450560838
243.0	4.88173659304114	2.830357641486229
243.0	-8.052555419803713	0.8784760641934326
243.0	-5.401757510549295	-4.044592747205509
243.0	2.8210811290053046	-0.7193774090349923
244.0	2.3157096923071623	0.2793116498013266
244.0	-1.0318723358690909	0.8125877837813336
244.0	-1.2838373564380798	-1.0918994335826735
245.0	0.934822299550029	-1.5394392392613059
245.0	0.5373946324681427	0.22766600774133616
245.0	-1.4722169320181875	1.311773231519969
246.0	1.6614887088068668	0.001889624326209374
246.0	-0.8866916867196251	0.08936006772045019
246.0	-0.774797022087241	-0.09124969204666959
247.0	2.3195091316132075	1.3968379147317247
247.0	-4.91743261172376	1.1317175249672935
247.0	2.597923480110575	-2.528555439699009
248.0	-0.6994221438721233	-1.0486470605645934
248.0	0.6752054294434751	0.04022873398955727
248.0	0.024216714428624986	1.0084183265750526
249.0	0.14999914746647472	-4.48432467815883
249.0	1.286249736880409	-3.6929636784722266
249.0	5.10448216741566	2.0896407637106273
249.0	-0.11951960057612432	12.669267842893936
249.0	-6.421211451186418	-6.581620249973506
250.0	8.854103367167706	-7.507151069991612
250.0	-2.8688546863811317	6.529732236448293
250.0	-4.54092985348043	6.582469289195965
250.0	-1.4443188273061385	-5.605050455652649
251.0	3.4862715113698295	0.698881619005581
251.0	-2.6722281591364956	2.934486050492131
251.0	-2.7429631090836355	1.8144892611132897
251.0	-2.1413858056446404	-1.6185018852217739
251.0	0.4476810856466864	-2.785276128493948
251.0	3.6226244768482236	-1.044078916895233
252.0	-0.26946116589841285	0.1491623930509591
252.0	-0.3452420819549003	-0.6395796002841173
252.0	0.31377814790636244	0.07330365998668535
252.0	0.30092509994691685	0.4171135472464996
253.0	0.0648978735678206	3.783430119116039
253.0	-2.370137761588129	-7.535173503202558
253.0	2.3052398880203064	3.751743384086509
254.0	0.04645656995804379	0.14666731508132871
254.0	-0.18965229803737202	-0.1997688551709846
254.0	0.14319572807932512	0.053101540089669774
255.0	-0.2390921708968645	0.2991693116122177
255.0	-0.6165073901597037	0.05447867744914349
255.0	0.8555995610565876	-0.35364798906138306
256.0	-0.8955284729256522	-1.1976204999740376
256.0	0.40603921353454864	-0.3878627438852943
256.0	1.3447966148829855	1.5809688015097663
256.0	-0.8553073554918637	0.004514442349557605
257.0	2.904348520160791	0.22678322876536164
257.0	-0.2660085752757571	1.3088836073741956
257.0	-1.2044046570169422	0.25935521116066357
257.0	-0.9656745436163369	-0.5877911997072295
257.0	-0.4682607442517537	-1.2072308475930316
258.0	-3.1473909198890877	-0.7927821377778465
258.0	2.198286498200718	-1.1735599849188123
258.0	3.3004133215078233	1.2663949472865537
258.0	-2.3513088998194664	0.6999471754101113
259.0	2.7255277609046966	2.0313648128619333
259.0	-3.4785393449412445	2.556232248712719
259.0	0.7530115840365461	-4.5875970615746375
260.0	3.4517503661115323	-1.8438919783472743
260.0	-4.521042735846493	8.218646166047124
260.0	-0.44923255829325154	-2.9342277096679754
260.0	1.5185249280282107	-3.4405264780318885
261.0	1.8970661320296343	-0.8486211101863
261.0	2.6891551115830232	0.10407956810929656
261.0	-0.5193563248495309	2.249966536757834
261.0	-5.851147716547212	-0.6164107025210973
261.0	1.7842827977841371	-0.889014292159731
262.0	0.35066563091979175	0.39310413284240003
262.0	-0.28422412699899036	0.2614041596548071
262.0	-0.06644150392078038	-0.6545082924972219
263.0	5.31437828632618	-1.150823290329806
263.0	-2.891448998438945	3.3988720781804966
263.0	-6.7169997002285635	0.4579802748422352
263.0	4.294070412341318	-2.7060290626929233
264.0	-0.32878707759132547	0.03209161984736932
264.0	0.5380079583688099	-0.33604773271054905
264.0	-0.20922088077749432	0.30395611286318147
265.0	-2.1881924582131065	0.19661654669929204
265.0	0.2743345906644007	-3.4978261232671004
265.0	1.629895364931696	-2.564444491238291
265.0	1.17789943015736	1.8641193200283726
265.0	-0.8939369275403126	4.001534747777719
266.0	-5.500426531042651	-2.0786240042923825
266.0	3.8546842910451082	-1.7348811586925514
266.0	5.113234907113938	-0.34931645665371147
266.0	-3.467492667116376	4.162821619638616
267.0	2.7171390355894207	-1.3505409017072105
267.0	3.991444402346443	-0.40884695604327437
267.0	1.9325576398082824	2.705133071767856
267.0	-3.6442573513028425	0.8723575278075347
267.0	-4.99688372644132	-1.8181027418248368
268.0	0.0385520524475961	0.6321567887987618
268.0	-0.43021239461232375	-1.0706029834079034
268.0	-0.3152644821950672	-1.0594756821522642
268.0	0.4393244670427217	0.7105680737159626
268.0	0.2676003573170769	0.7873538030454295
269.0	-3.6707968934220356	-1.2312635035603845
269.0	1.888228058270436	-3.192918275933105
269.0	1.897062705518262	0.03323092632357251
269.0	-0.1144938703666756	4.390950853169922
270.0	-2.5369336222055012	0.9884235641041931
270.0	4.396871153853738	-4.024652050458795
270.0	-1.8599375316482372	3.036228486354616
271.0	7.953389384653797	2.0301999179731993
271.0	6.574149991311775	3.1314437140390807
271.0	-8.663511582503691	2.4277861353306727
271.0	-7.048138744390726	-3.9619190787522793
271.0	-6.35287355390445	-4.080126674793156
271.0	7.536984504833271	0.45261598620249766
272.0	4.041325019128171	1.4100080413305136
272.0	0.593481799045533	2.176598107217437
272.0	-2.3688743682914604	-1.5105950222675686
272.0	-2.2659324498822486	-2.0760111262803873
273.0	4.671938476715342	-0.10754430601449007
273.0	-2.0027092203346313	2.6406142734698363
273.0	-2.7958227700091367	0.2706763137321712
273.0	-2.1305226888581026	-0.3040963667935932
273.0	2.257116202486543	-2.499649914393957
274.0	-1.1009725945621305	-1.1326933173446094
274.0	1.2826253421850138	0.45805762361994173
274.0	-0.18165274762288375	0.6746356937246712
275.0	0.18166778374003423	0.05217070625742325
275.0	-0.07709172634820625	0.203993320560881
275.0	-0.10457605739180235	-0.256164026818323
276.0	1.408889347269738	-7.0347489349303505
276.0	2.611506620332978	8.77431356554908
276.0	-2.444642497875987	5.674362583383587
276.0	-1.5757534697267535	-7.413927214002249
277.0	4.448841115847127	3.342803374666003
277.0	2.4428182354000714	3.1287902137881165
277.0	-3.550569038694166	-0.9464805937831532
277.0	-2.0877304025598233	-2.9448539955266355
277.0	-1.2533599099932027	-2.580258999144289
278.0	1.3258391838768253	-0.4725251364847521
278.0	0.1241825488003791	0.7039339191557858
278.0	-1.4500217326772167	-0.23140878267100806
279.0	-2.9836365766437454	2.779016390403141
279.0	-0.17258110286512357	-4.080753381622653
279.0	3.119531671479875	-4.08106633858932
279.0	2.75471342094362	2.304498175444151
279.0	-2.7180274129146396	3.078305154364663
280.0	-3.2187346321223647	-4.438231896976842
280.0	1.5681446274245492	-6.064042858788482
280.0	4.2615117143948	0.016701357804341153
280.0	-2.6109217096969846	10.485573397960982
281.0	-0.00646420652364811	0.12229363620401287
281.0	-0.10689402280131163	0.062312170843294296
281.0	0.11335822932495973	-0.18460580704730717
282.0	-2.398210963287955	3.1645787426484424
282.0	-0.1229745989181335	-3.3946751423778
282.0	1.8743916690570037	-2.125913453679352
282.0	0.6467938931490773	2.3560098534087235
283.0	7.3606558842997725	8.796622912938917
283.0	-2.312333257844029	8.2968833321588
283.0	-11.125705690857519	-3.1966657779301544
283.0	-10.282900081668283	-4.88876233672501
283.0	1.0266015907050066	-6.359641936482481
283.0	1.477157359231345	-6.126481694931319
283.0	13.856524196133728	3.478045500971138
284.0	0.39162185344754924	0.27338854716589783
284.0	-1.1421866632725364	-0.21127147661039955
284.0	0.7505648098249806	-0.06211707055548514
285.0	0.778637428391843	-2.5233086378758496
285.0	1.397729038367525	2.6667591852613763
285.0	-2.176366466759368	-0.14345054738552704
286.0	-1.1661573676334043	-0.09673330829804506
286.0	-0.9210193751819922	-0.5027374754685329
286.0	2.087176742815403	0.599470783766553
287.0	-1.7995424329035765	-0.28237098405701483
287.0	1.4830247308820834	-2.0408462511379075
287.0	4.665020488677453	-0.8771040666928948
287.0	-4.348502786655962	3.2003213018878243
288.0	0.19111606281589497	0.06378417022179537
288.0	0.0696985567321298	0.08413161720122116
288.0	-0.26081461954802587	-0.14791578742299646
289.0	-0.34124940600809767	0.06590312567225483
289.0	-0.18462261316930825	-0.4371642845025582
289.0	0.5258720191774059	0.37126115883030336
290.0	-0.8183956800546499	0.5630098799890743
290.0	0.8834358551238845	-1.522617326132132
290.0	-0.0650401750692083	0.9596074461430688
291.0	0.4170558450613682	-1.4239525541059563
291.0	2.384550929036403	-0.44050468646673296
291.0	-1.1423742526124958	1.2701622126403047
291.0	-1.6592325214852655	0.5942950279323952
292.0	0.4352252761768297	-0.5224588830755736
292.0	0.15895892678207837	0.16780231503170773
292.0	-0.5941842029589185	0.35465656804383594
293.0	-3.54322136354621	-2.0686988045532706
293.0	-3.3848525983482722	-2.321709212358166
293.0	4.805297397399071	-1.569652182322328
293.0	2.1227765644953833	5.96006019923377
294.0	-2.047971151021789	0.7199404823902622
294.0	-0.19903207236690512	-1.0229973873304228
294.0	2.2470032233886834	0.3030569049401512
295.0	-3.2340353896288794	0.8345152931397729
295.0	1.8809716063723774	-2.587825285654768
295.0	1.3530637832564893	1.7533099925149893
296.0	-0.2832429450149385	-1.2286777737788088
296.0	0.7334168586321761	1.5344801018631389
296.0	-0.45017391361719566	-0.3058023280843226
297.0	-1.7078335934110203	-4.643639189932377
297.0	-1.1911281829304512	-4.865183856852436
297.0	3.617743513565033	3.1143417032293392
297.0	2.3139738165913357	5.433387512645679
297.0	-3.032755553814889	0.9610938309098072
298.0	3.2966165474941125	1.104949144249567
298.0	0.571557764010783	1.3539087313827245
298.0	-1.383669234337051	0.358384051876289
298.0	-1.521668465529978	-0.4549587095171012
298.0	-0.962836611637862	-2.362283217991493
299.0	-1.5425542018966918	-1.7498343776474208
299.0	1.0896861394038613	-0.41645182589416335
299.0	1.5420748054318136	0.7860238952054692
299.0	-1.089206742939029	1.3802623083361485
300.0	2.53395300844465	-2.511012337343469
300.0	-1.716634662655627	2.190883679426032
300.0	-1.7483776551582533	2.181292648652862
300.0	0.9310593093692063	-1.8611639907353896
301.0	4.014522618545066	-0.9472641722257066
301.0	4.323219622469646	-0.20424749469624734
301.0	1.3616506371505965	4.738962275680162
301.0	-0.23999446207126499	4.616475621810026
301.0	-5.5966852904930064	-3.8707076880027524
301.0	-3.862713125601039	-4.333218542565491
302.0	0.02648716039240469	-0.2069064852575944
302.0	0.04325727064074429	0.12546387900094177
302.0	-0.06974443103315144	0.0814426062566666
303.0	0.08497749117841612	0.1351653715244866
303.0	-0.033169895907900135	0.007491144405809133
303.0	-0.05180759527051566	-0.14265651593029657
304.0	-1.805007510985867	-0.9078956586344611
304.0	-0.02038146755582392	-1.4541821751107538
304.0	1.5387920018004728	0.7231073959282205
304.0	0.2865969767412144	1.6389704378169943
305.0	0.679419260606863	3.37251327656781
305.0	0.015043100308411411	3.2649943878166696
305.0	-1.5045909680265956	-0.6065906940261758
305.0	-1.8169275491009513	-1.940101447465651
305.0	0.5125078632034032	-2.6444909485018226
305.0	2.114548293008866	-1.4463245743908237
306.0	0.3248172563165007	0.2365834506922688
306.0	-0.9974752255331081	0.425461422914757
306.0	0.33930479942694547	-0.8852294595945489
306.0	0.33335316978966023	0.22318458598751814
307.0	0.15447833770420316	-4.53446018378954
307.0	2.166342841866827	-1.463482108110211
307.0	1.8759920716410672	2.6769918566247783
307.0	0.3711498334292675	3.621804673692158
307.0	-4.567963084641347	-0.30085423841716635
308.0	-2.8414229686781503	0.7516716324046315
308.0	-2.536919446591184	0.29792202147779046
308.0	3.389004040946301	-1.4345890346424988
308.0	1.9893383743230246	0.3849953807600965
309.0	1.9848500791373154	5.357396126946982
309.0	-5.188544796325799	4.203224134901497
309.0	-5.60982998360245	3.2143669336743295
309.0	4.058598655713305	-7.855790087611363
309.0	4.754926045077654	-4.919197107911488
310.0	-1.8873237113597232	-1.7477216291098525
310.0	1.6491752837266662	-0.8143366824848728
310.0	1.9789881043844284	1.3873096966027374
310.0	-0.5281594480326542	0.9604088118258983
310.0	-1.2126802287186689	0.21433980316602194
311.0	0.011973477097722422	0.1402925270975836
311.0	-0.21860450903984288	0.0491070671509902
311.0	0.2066310319421389	-0.1893995942485658
312.0	2.576002959895753	-7.585629282031757
312.0	3.426412433456608	-7.069017595327957
312.0	3.2167135277225984	2.2472966367404155
312.0	-0.7131328544403707	6.0840511646909
312.0	-4.617062130236495	4.439732066729063
312.0	-3.888933936398079	1.883567009199335
313.0	-4.676846497149393	-2.86135420834035
313.0	-4.260781721340503	-2.8083485140725215
313.0	7.326004204737435	2.7320219196365696
313.0	6.788977999960915	3.79990769320859
313.0	-5.17735398620849	-0.8622268904322619
314.0	-0.06296211041103308	-2.4125008291986747
314.0	0.6881347382195885	1.433462101017686
314.0	-0.6251726278085924	0.9790387281809675
315.0	-1.4188201775603295	2.1546276508581146
315.0	-1.757668693964797	-1.6994362111288075
315.0	-1.319362819460825	-2.798653951514878
315.0	4.495851690985976	2.343462511785556
316.0	-0.2459809731503794	-0.8235532862092735
316.0	0.8854524403075832	-0.8652914591977331
316.0	1.2638825931140356	-0.004711316423438327
316.0	-1.9033540602712125	1.6935560618304353
317.0	1.542008910504799	3.1675047852340668
317.0	-2.0420058326917507	7.486036155198646
317.0	0.17727622694050257	-5.3246157108709715
317.0	0.3227206952464568	-5.328925229561784
318.0	-7.078923380934611	-1.3794417811837212
318.0	3.5972784656545342	-3.0351337108211967
318.0	3.481644915280071	4.414575492004917
319.0	0.35950954403179386	-0.030646215516069553
319.0	0.0009919715937021813	0.27407636826344944
319.0	-0.4913518162592929	-0.020966882051927913
319.0	0.13085030063380151	-0.22246327069542304
320.0	-0.44934361900330466	-0.33164570202702043
320.0	0.49020123432116386	-0.4007457956484239
320.0	0.6104850517542412	0.9774111114031572
320.0	-0.6513426670720847	-0.24501961372771552
321.0	0.9228885286907126	0.19827069535905278
321.0	-0.46979762385189233	0.052043408604265165
321.0	-0.4530909048388304	-0.25031410396333015
322.0	4.922462413405101	0.7254467271349221
322.0	-4.835335687363182	0.22719740341326858
322.0	-4.740513800266524	0.14113676777534043
322.0	4.653387074224571	-1.0937808983235118
323.0	3.383330840379353	-3.1200322464919616
323.0	4.045739350130655	2.639268277603559
323.0	-2.3965628831849224	3.490408090889258
323.0	-3.6975901670005156	2.0161328113250727
323.0	-1.3349171403245552	-5.025776933325878
324.0	-0.677652892034084	0.25557074232097443
324.0	0.2665670668422394	-0.439521785902262
324.0	0.41108582519185843	0.18395104358127984
325.0	1.0948698353439141	-1.1901896230509297
325.0	1.1210217847743742	0.2407141334551529
325.0	-0.9937934531367228	0.5125341622603501
325.0	-1.2220981669815645	0.4369413273353975
326.0	-0.7688557340188257	-0.7947543930211757
326.0	-0.3998327694240527	-1.086770839359031
326.0	1.1686885034428711	1.8815252323802352
327.0	-1.7491852375227657	2.086810080003414
327.0	-0.3779507851683168	-2.3497489189225025
327.0	1.2801196520723395	-1.2201397985665234
327.0	0.847016370618735	1.4830786374856004
328.0	-0.5163637161694813	0.4302156307894132
328.0	-0.2889499357592967	-0.4575135281967985
328.0	0.4392681166792175	-0.07355643516226616
328.0	0.36604553524956884	0.10085433256961689
329.0	0.7124601259847402	-1.3120631058169823
329.0	1.648824313148157	0.2869348136433448
329.0	-2.361284439132921	1.025128292173622
330.0	3.293239053632766	1.288427386356522
330.0	3.226933739239331	3.2448506970831965
330.0	-6.10380477889193	-0.00670949954996295
330.0	-0.4163680139801628	-4.526568583889749
331.0	-0.2590078131773883	-0.15534474892883318
331.0	0.2860882397497502	-0.28768570887503797
331.0	-0.027080426572354335	0.4430304578038778
332.0	1.2623563348721158	-8.701519600143818
332.0	5.843429636173987	-7.686126993268084
332.0	-1.3779420696664682	5.388956930715562
332.0	-1.7441938659280811	5.564200470793066
332.0	-3.983650035451558	5.434489191903288
333.0	0.9896765276964943	-0.5090760230894595
333.0	0.05028239944562749	0.9538966605805815
333.0	-1.0399589271421317	-0.44482063749110184
334.0	3.647491037095973	3.5006862142027226
334.0	3.475901463853169	4.119603178277161
334.0	-3.604908220021311	2.6977382207854603
334.0	-4.713471967650655	-2.719137592656112
334.0	1.1949876867228508	-7.598890020609216
335.0	-2.22083068477291	0.8570368092137991
335.0	-2.3995691178941456	0.4280235978594654
335.0	1.2392622075383526	-1.9357402141661861
335.0	3.3811375951287244	0.6506798070929745
336.0	1.510796049390925	0.19236431643343158
336.0	-2.9398969184978734	0.836024686498578
336.0	-0.32445241690821763	-0.6885016110220867
336.0	1.7535532860151843	-0.3398873919099533
337.0	-4.831357371335798	0.6688516045488992
337.0	5.107720440807085	-3.70802386724038
337.0	5.163936687550002	-2.9341130974220224
337.0	-1.0425945871839337	4.606958254648016
337.0	-4.397705169837361	1.3663271054655075
338.0	-7.725813743473977	-0.5244630876919374
338.0	-1.9597145035611698	-6.922093261416189
338.0	4.5583342723889295	-7.2483470826115175
338.0	7.6655916715712005	-2.398206427645482
338.0	1.420747658347432	8.644941751852315
338.0	-3.959145355272462	8.448168107512823
339.0	-7.057418187673542	-2.412380868009062
339.0	6.540038941948609	-4.4215709867680895
339.0	9.980674937580678	-2.4204552995913584
339.0	2.8382061455371925	8.096666440098842
339.0	-12.30150183739296	1.157740714269686
340.0	-2.2278944861719046	-0.646718755093845
340.0	1.770526234086994	-0.2335456217610123
340.0	2.0583171343264235	0.5070522743150734
340.0	-1.6009488822414828	0.3732121025397938
341.0	0.4730555261514978	-1.3282033506959652
341.0	0.5848580193579828	0.9519754800511817
341.0	-0.4594053944165091	0.30248087229016607
341.0	-0.5985081510929625	0.07374699835458302
342.0	3.4499177581265137	-0.3706716556115099
342.0	0.4456277915431012	3.3862220146707247
342.0	-3.3168312962686533	-0.24392466901711238
342.0	-0.5787142534009664	-2.771625690042097
343.0	1.4579594215956326	1.956907469831729
343.0	-2.8698014847872337	0.904451608826448
343.0	0.5144545353063905	-1.5166998530808526
343.0	0.8973875278852138	-1.3446592255773215
344.0	0.6628570063124587	-0.24566383940550163
344.0	0.2119243763246939	0.41563515148704416
344.0	-0.8747813826371543	-0.16997131208153565
345.0	-5.003071463747612	3.070128711725068
345.0	-2.363372174616744	-4.68363665504388
345.0	-0.13118778643656906	-5.821859103729744
345.0	3.3659382515706064	2.559603086249261
345.0	4.131693173230325	4.875763960799315
346.0	6.043400762178313	3.050952220547747
346.0	-4.045596648162481	3.0840750110853734
346.0	-4.341901951682597	1.2020807419027235
346.0	2.3440978376667654	-7.33710797353584
347.0	1.1142660025034705	4.306802678099354
347.0	-2.4664396190972795	3.2501717149216582
347.0	1.352173616593823	-7.556974393021014
348.0	6.005386220915729	3.6448818738760145
348.0	-7.27307010801119	0.4438944117566146
348.0	-6.847082702607635	-2.216304119290776
348.0	8.114766589703105	-1.8724721663418342
349.0	0.11113601029959237	-0.03531268827577814
349.0	-0.08052768781067783	0.19003811654325076
349.0	-0.030608322488917258	-0.15472542826748656
350.0	-0.02441254800271495	0.15904221398916846
350.0	-0.06797435725754868	-0.11015182320644751
350.0	0.09238690526030921	-0.04889039078269755
351.0	-1.7872095606633593	2.411802911716981
351.0	-1.388082365270714	0.04790391769116179
351.0	0.7613620792635233	-2.317996790181564
351.0	1.40467933610872	-2.6034786883347762
351.0	1.009250510561816	2.4617686491082122
352.0	0.10396968931443296	0.24006185801326776
352.0	-0.03701514783508346	0.3619280372454962
352.0	-0.06695454147935972	-0.6019898952587739
353.0	-0.08199830522861166	0.008990558133348977
353.0	0.048085133325141076	-0.09572735409065804
353.0	0.06600246109955861	0.014973969119454792
353.0	-0.032089289196073824	0.0717628268378685
354.0	3.107725548955736	-9.193866452268866
354.0	4.074825591638126	6.080312920541194
354.0	-2.8564578046574094	4.419915971365607
354.0	-4.326093335936466	-1.3063624396379259
355.0	1.7343376058341877	-0.4859032343268323
355.0	-2.6041616693266407	1.7967189361977922
355.0	0.8698240634924407	-1.3108157018709496
356.0	2.451217351366481	7.9734755741074785
356.0	-5.070174922548053	2.9886069471859797
356.0	-1.1598917397126138	-5.885351124063383
356.0	3.778849310894207	-5.076731397230096
357.0	0.15785556247141286	0.7802696433560175
357.0	-0.03193183998446231	0.513650321686972
357.0	-0.3234004156790945	-1.4315096609675582
357.0	0.19747669319214597	0.13758969592457157
358.0	-2.3718216260395097	7.191353640177511
358.0	-3.435305953914067	5.606322142761533
358.0	-11.37888833915809	-15.439167146101928
358.0	-6.034844234830844	-13.392052478509543
358.0	12.921766306215575	6.95593413285062
358.0	10.299093847726905	9.077609708821806
359.0	-1.0293259766935543	-0.542630739204606
359.0	1.304308777905773	-1.4390140606014976
359.0	-0.2749828012122165	1.9816447998061006
360.0	-2.3653094867707525	0.9624276011473699
360.0	-2.682957464425418	-0.5436801414188481
360.0	-1.354739196900871	-1.8442356144767684
360.0	3.2287197943407566	-0.30049448580361765
360.0	3.174286353756271	1.7259826405519045
361.0	-1.5002092338677753	0.24359408009456318
361.0	-0.18918271989844893	-0.5555940086348886
361.0	1.6893919537662039	0.3119999285403244
362.0	-0.14074353665512868	-0.08109635127210474
362.0	0.06779694329987791	-0.0027852442227075296
362.0	0.07294659335525214	0.08388159549479812
363.0	0.22282000804260174	0.2885403312812816
363.0	-0.5724069154874222	-0.020581158545281773
363.0	0.3495869074448199	-0.2679591727359981
364.0	-4.813333718442797	-0.27383855796414525
364.0	3.7652233096537078	-0.9579546709096531
364.0	3.5741344246029505	-0.449245944307623
364.0	-2.526024015813851	1.6810391731814487
365.0	1.0472169403445386	3.795929410606253
365.0	-4.181782700851458	4.069324283972955
365.0	-4.833499192698386	3.1380992475600387
365.0	-1.0111704167980333	-5.979099606453773
365.0	8.979235370003364	-5.024253335685484
366.0	1.3602689817743683	1.5174741724175553
366.0	-0.9428583341756539	0.138594734019772
366.0	-0.41741064759872676	-1.6560689064373568
367.0	0.23522942936705288	0.5270490600228572
367.0	-0.9991758636334683	0.19381923840324258
367.0	0.7639464342664296	-0.7208682984261008
368.0	-0.08137602079961077	-0.2937990269528559
368.0	0.26393822060536726	-0.03349701900260783
368.0	-0.18256219980574964	0.3272960459554619
369.0	-0.9802971606032674	3.0560100534983103
369.0	-2.5463943161328815	-2.090884462850945
369.0	3.5266914767361492	-0.9651255906473654
370.0	-0.11576883192544299	-0.45788588913421074
370.0	0.17726723720288529	0.13825059175640475
370.0	-0.06149840527744343	0.319635297377799
371.0	-0.6087060505362086	-0.6043461194347411
371.0	0.7294649920039354	-0.017995806296151797
371.0	0.5212338166745829	0.2874770606147501
371.0	-0.6419927581423104	0.3348648651161454
372.0	0.3919564166981816	-1.6145180456628265
372.0	1.1931640623409452	2.269680980771528
372.0	0.06333259589116187	2.769362356168174
372.0	-1.6484530749303015	-3.4245252912768693
373.0	1.0833840667989505	-0.2026499959460059
373.0	1.227018377084213	0.05916028043585281
373.0	-1.0514453135208042	0.8591106582121225
373.0	-1.2589571303623592	-0.7156209427019694
374.0	0.13836807818851174	-0.11824976004211225
374.0	0.024877363329775363	0.11532592472854537
374.0	-0.1632454415183118	0.002923835313582639
375.0	-0.7332939366041664	2.5854687638520106
375.0	-1.5286539892016189	-0.6895292067776047
375.0	2.2619479258057855	-1.8959395570743918
376.0	0.8934088443064988	-1.192815370757014
376.0	2.3174662264033974	-1.0868690467529607
376.0	-1.2910721204345015	1.6512074710690245
376.0	-1.9198029502753966	0.628476946440972
377.0	-1.7031906711766098	-2.4977160074090508
377.0	0.24340474894621766	-3.558898166350992
377.0	0.7915342273998103	3.0081960961134113
377.0	0.6682516948305871	3.048418077646636
378.0	-0.684144765664448	5.619827092049784
378.0	-1.3237233811234548	2.2549962712876295
378.0	-1.5584668488952682	-6.56609918594643
378.0	1.0505610259098375	-6.767610906827923
378.0	2.979828529227006	-0.1353614342334727
378.0	-0.46405455945364227	5.594248163670459
379.0	0.21280236737330738	-0.2449907293462941
379.0	0.2670440777717666	-0.04386312225364644
379.0	-0.4798464451450672	0.288853851599912
380.0	2.312550723432981	1.2387592738364888
380.0	-3.743861881549505	1.3158955730195345
380.0	-1.2150640871136842	-3.593242527368751
380.0	2.646375245230224	1.0385876805127152
381.0	0.057720657093133405	-0.07168733953786469
381.0	0.102175756055951	0.03262840965259744
381.0	-0.1598964131490995	0.03905892988527221
382.0	-0.337321879799718	0.09408256711772559
382.0	0.30183842477439266	-1.2398379022759751
382.0	0.035483455025328244	1.145755335158252
383.0	0.8484619344019438	2.8506241218088286
383.0	-0.7651899870548796	-1.2278052186439685
383.0	-0.0832719473470631	-1.6228189031648586
384.0	0.25569247984568927	-0.767175480914902
384.0	0.8952502358660197	-0.06460891795084782
384.0	-1.150942715711728	0.8317843988657432
385.0	0.2575768903549371	0.39152322134987844
385.0	-0.5966790192017251	-0.4998126918214399
385.0	0.3391021288467944	0.10828947047157414
386.0	3.055285742045997	0.5001074038480467
386.0	-1.6468148464731924	2.6237198468862517
386.0	-1.4084708955728114	-3.1238272507343
387.0	-0.3199207296645654	-0.1705368016962639
387.0	0.005190125038371175	-0.25432421654649545
387.0	0.31473060462619823	0.424861018242773
388.0	-3.6788451815047396	-6.349103216222431
388.0	6.5476269576506185	-5.815405525196184
388.0	4.770605777191215	7.723953073259958
388.0	-7.639387553337111	4.440555668158653
389.0	-1.0217559474344158	0.1572439592678714
389.0	-0.4890173966490888	-2.0826600034871805
389.0	2.07523493729486	-1.2261881177077065
389.0	-0.5644615932113627	3.1516041619270085
390.0	1.4658061589023632	7.936135165573938
390.0	-2.361382970475292	-2.541240029336813
390.0	-2.1158038623256736	-2.806437135375736
390.0	3.01138067389861	-2.588458000861408
391.0	-0.42218119861995973	0.0476973334996514
391.0	-0.31096862266840136	-0.09492821168635385
391.0	0.45946972215137444	-0.29966851050083065
391.0	0.27368009913699476	0.3468993886875468
392.0	-0.8848346541922917	-0.5575604727707536
392.0	0.9254976051332707	-0.5716772043841672
392.0	-0.04066295094095009	1.129237677154934
393.0	-1.2382135154857086	-1.2970305067177175
393.0	0.9053274688308209	-0.40395094570899814
393.0	0.8260705483197978	-0.07736943881697828
393.0	-0.4931845016648885	1.7783508912436878
394.0	-0.4704205771554896	5.661045168392614
394.0	-3.079135828595953	0.7717100530802407
394.0	3.5495564057514635	-6.432755221472835
395.0	2.0175128539813802	9.599463361332853
395.0	0.8171861727333992	12.256669192846042
395.0	-4.0012684976208845	-3.3407119409747668
395.0	1.1665694709061316	-18.515420613204114
396.0	0.35498848621179396	-0.29958646901076175
396.0	0.1723859203140362	0.11664913446994603
396.0	-0.5273744065258212	0.1829373345407887
397.0	1.187889451869364	-1.785907395530187
397.0	-0.05832809550743868	1.5158202202676487
397.0	-1.1295613563619273	0.27008717526250914
398.0	-0.3176944935263239	-0.7361809205832213
398.0	1.3565473286750687	0.8328678052310121
398.0	-1.038852835148732	-0.09668688464778395
399.0	-3.5908326800266943	3.494486874437671
399.0	-3.5481106020825663	2.8339609187076165
399.0	2.477115079659921	-3.9695349244337086
399.0	4.661828202449349	-2.3589128687115766
400.0	0.015563739657045609	0.24088072687490397
400.0	-0.0695362145381122	0.23005365890376955
400.0	0.017478581980727662	-0.2368401767545709
400.0	0.03649389290037581	-0.2340942090240801
401.0	-1.4093811993110372	-4.181565384561649
401.0	-1.182369736853222	-3.8926125762628354
401.0	1.7624289981115093	4.354014273725055
401.0	0.8293219380527432	3.720163687099426
402.0	2.0184184050168805	-0.8224911632695177
402.0	-1.0851100465094443	1.1368807538131263
402.0	-1.5255435562357043	0.6285138754797153
402.0	0.5922351977282715	-0.942903466023323
403.0	-0.19955609364299529	-0.6036652654535307
403.0	1.482307882102381	0.4480171593042404
403.0	-1.282751788459412	0.15564810614927904
404.0	2.9089326822269133	1.0508487736314502
404.0	-5.9029719093503905	-1.4342450587024287
404.0	2.994039227123473	0.383396285070985
405.0	0.04816959388348996	-0.42868341413613564
405.0	0.12985001848680894	0.2617212618709056
405.0	-0.17801961237028627	0.16696215226523967
406.0	1.6827498129288845	1.509913856635815
406.0	-0.13274106297545912	3.414668922539627
406.0	-1.9181903411836134	-0.17239642140100814
406.0	-1.0220998587131007	-3.100122625192389
406.0	1.390281449943303	-1.6520637325820784
407.0	5.765031768849175	1.1173502469423209
407.0	-3.037523079267385	0.13054562744393303
407.0	-2.727508689581817	-1.2478958743862651
408.0	0.602889510044427	-0.49886127955866677
408.0	-0.8423404361118171	1.7616430537738978
408.0	0.2394509260673901	-1.2627817742152312
409.0	-5.6298828999615695	-3.8717540915952005
409.0	7.125158071033262	0.9733048352194861
409.0	4.072671109333401	4.105841764516108
409.0	-5.567946280405097	-1.2073925081404067
410.0	1.0075064655371113	-0.4485172794184202
410.0	-0.16710594406859733	1.0672716154792343
410.0	-0.8404005214685167	-0.6187543360608209
411.0	-0.7506303441699624	2.4197462175124373
411.0	-3.4659924030590386	1.8847752901954582
411.0	4.21662274722897	-4.304521507707888
412.0	0.12793500941359992	0.7007265283974683
412.0	0.057229159988627855	0.7542349396857114
412.0	-0.3706767708868347	-0.8168537797440033
412.0	0.18551260148459994	-0.6381076883391886
413.0	-1.0336793003434244	2.9700406830855273
413.0	-2.5796560287385737	-0.4207871373204934
413.0	0.8320478884719461	-2.217520563966991
413.0	2.7812874406100527	-0.33173298179804367
414.0	-1.9748286241778128	-4.617042994691101
414.0	-1.670786151968962	-4.912082454977562
414.0	11.011536016643344	3.562727917335647
414.0	-7.365921240496541	5.966397532333032
415.0	-2.092246219810233	-3.176914100018979
415.0	1.4051665908405078	-2.89517648123781
415.0	6.045414806231334	3.919612155924973
415.0	-5.358335177261597	2.152478425331808
416.0	-0.7892918917492494	-0.780456466745411
416.0	3.501988565887018	0.9281347871296387
416.0	-2.7126966741377885	-0.14767832038423206
417.0	0.41734517628349116	-0.19516192571703306
417.0	-0.7260131716492954	0.5418319482221828
417.0	0.3086679953657892	-0.34667002250514445
418.0	-2.349817063937128	2.273579977134153
418.0	-1.9288322493821808	-3.343691962723459
418.0	3.267425409932455	-1.0662804755133861
418.0	1.0112239033868817	2.1363924611026985
419.0	-0.02790032432710966	0.10925036099942359
419.0	0.0043717160432108606	-0.05806229117474715
419.0	0.023528608283894695	-0.051188069824691804
420.0	-0.19946402821822423	0.20478909748182897
420.0	-0.2937903371114219	-0.07946926484407665
420.0	0.49325436532961836	-0.12531983263776178
421.0	2.0777705911122255	0.14750225336680212
421.0	-1.7703002313334752	1.9465711038688278
421.0	-0.3074703597787569	-2.0940733572356165
422.0	5.139795562908437	-0.5279905598212367
422.0	-1.1928598342389274	7.365832021553894
422.0	-10.68627221458347	3.8169160582200794
422.0	1.804805214439186	-9.175479960106868
422.0	4.934531271474738	-1.4792775598458792
423.0	-4.662696598414364	-3.038780609244044
423.0	3.103670688535999	-0.42576790290694444
423.0	2.978445669806283	0.21166335343727083
423.0	-1.419419759927902	3.252885158713694
424.0	-0.0730896332986484	-0.17174999494466903
424.0	0.17864713442119792	-0.014758923979413694
424.0	-0.1055575011225446	0.18650891892408894
425.0	0.5440355026368797	-0.06607426299258143
425.0	-0.1323071455214641	0.22567001669350537
425.0	-0.41172835711539046	-0.15959575370096116
426.0	-2.703457600167765	1.902955188141624
426.0	-4.23958932711475	-1.1298755403742902
426.0	3.6312962020167325	-2.2626830188263245
426.0	3.3117507252658074	1.489603371058975
427.0	-0.39867808508967817	-0.5791098725711135
427.0	0.6833528630705696	0.03958494051967484
427.0	-0.28467477798089147	0.5395249320514386
428.0	0.9961407768448647	0.9023665120673734
428.0	-1.9601577284674523	-0.9414707301363545
428.0	0.9640169516225955	0.039104218069011897
429.0	-3.661338982621447	-1.8833044318730618
429.0	2.683193882945541	0.06448996384544117
429.0	0.9781450996759062	1.8188144680276208
430.0	0.3112875716473733	-0.47576167429463956
430.0	-0.13121084080280082	0.24810806969964627
430.0	-0.18007673084457015	0.22765360459500003
431.0	-0.14969465240327534	0.14596112384617843
431.0	0.07297651420252937	-0.17727315755655348
431.0	0.07671813820073829	0.03131203371033311
432.0	-0.5316259634618948	-0.28275001821744156
432.0	0.5347836133549556	-0.35750004100968075
432.0	-0.003157649893059356	0.6402500592271213
433.0	-0.07543604859031743	-2.7772754961130985
433.0	1.0744233678528488	0.08372112645626853
433.0	1.257186422776245	1.3122814177211437
433.0	-1.1605651123276914	3.2262387311165326
433.0	-1.0956086297110743	-1.8449657791807732
434.0	-0.1385253861134824	0.027551816002313056
434.0	0.060947007728215444	-0.02581530325029765
434.0	0.077578378385308	-0.0017365127520269543
435.0	0.36599416184691963	0.3229393929020097
435.0	-0.1439056798940092	0.13957293838991164
435.0	-0.2681641783683528	-0.2353145031986643
435.0	0.04607569641543185	-0.22719782809328035
436.0	0.08047802298931774	-0.24663318110360938
436.0	0.06274962938097133	0.30702808198791026
436.0	-0.14322765237031285	-0.0603949008842838
437.0	-0.5966106476851426	-0.44039317588006055
437.0	1.3096122527791487	-0.904338108848425
437.0	-0.7130016050940123	1.3447312847284891
438.0	0.04115193871824078	-0.04395980610734801
438.0	0.040785476510454895	0.13136056804984167
438.0	-0.0921978681517671	0.0036111731440423623
438.0	0.010260452923062642	-0.09101193508651795
439.0	0.02765279277416297	-0.06088002270939226
439.0	0.1899917726830774	-0.006852989423654125
439.0	-0.2176445654572547	0.06773301213303227
