# Supplementary material
Source: ML conference proceedings conference paper supplement (https://openaccess.thecvf.com/content/CVPR2021/html/Harel_Crossing_Cuts_Polygonal_CVPR_2021_paper.html)
Supplement: Supplementary file 2 [file Harel_Crossing_Cuts_Polygonal_CVPR_2021_supplemental.zip › Dataset/D4/p7/pieces.csv]

piece	x	y
0.0	-4.172768902250318	4.409904270496947
0.0	-4.334352805776918	4.390128852791752
0.0	-0.6447313576875995	-4.868534958832671
0.0	0.16927863823644468	-4.814910343983001
0.0	4.596585150958924	0.3455644297129079
0.0	4.385989276519471	0.5378477498140515
1.0	0.28596888440144497	-0.5695493216268233
1.0	0.28823497317710917	0.5329643335534594
1.0	-0.5742038575785344	0.036584988073367915
2.0	1.0604896574537759	1.4993496760552003
2.0	-2.448849552671261	-1.6571432203216492
2.0	1.388359895217485	0.15779354426644895
3.0	3.2827478186630543	1.0101030697002082
3.0	-2.027831021820836	-0.03772328228508285
3.0	-1.2549167968422195	-0.9723797874151608
4.0	-0.8496919482347117	-0.21201465452172522
4.0	0.8992530808822384	-2.019081814067733
4.0	-0.04956113264752052	2.231096468589462
5.0	-0.9723579882536544	-1.4333158192579258
5.0	0.977866377451387	-0.09324837675190227
5.0	-0.005508389197783973	1.5265641960098268
6.0	1.6448141272438435	1.736805443940106
6.0	-0.12963567420552852	1.6380271828893256
6.0	-3.924000324034462	-4.239955838872681
6.0	2.408821870996153	0.8651232120432703
7.0	1.9080224745486802	3.5213323391441547
7.0	0.9334989156404415	4.056278204455403
7.0	-1.6324644644020931	2.7908649189380927
7.0	-4.260868752967393	-2.8608813028574978
7.0	0.18001164682583332	-4.426371135098473
7.0	0.9085076208126389	-4.199156554486723
7.0	1.9632925595418602	1.117933529905044
8.0	1.498626042489348	0.39105356090278687
8.0	-1.0373566060858854	0.6818200277079588
8.0	-0.46126943640345647	-1.0728735886107408
9.0	-0.12514814302147845	0.3910948569605933
9.0	-1.2638694779291595	0.35757859090516625
9.0	0.8390112373431967	-0.917549065824291
9.0	0.5500063836074505	0.16887561795852063
10.0	0.04314814325420178	0.6128002189073015
10.0	-0.6422890764186466	-0.311663379517256
10.0	0.5991409331644605	-0.3011368393900329
11.0	0.47389279634092246	0.4754001045758271
11.0	-0.9715954435659437	-0.35723738226289864
11.0	-0.007519034821119395	-0.5302867100642407
11.0	0.5052216820461342	0.4121239877513208
12.0	2.715485299331527	4.775022768780607
12.0	-3.468406565316996	3.681473966935046
12.0	-4.202792281659456	2.8696244137047375
12.0	2.0834421034087027	-6.202181141418961
12.0	2.872271444236223	-5.123940008001422
13.0	3.2246592997074397	-2.8268507593636425
13.0	-4.7775108010446345	6.878446027025717
13.0	-1.246107251207889	-0.4446531785159352
13.0	2.7989587525450963	-3.6069420891461488
14.0	-2.855779474045163	-8.395856396414443
14.0	8.179747656514031	-14.443524658395607
14.0	8.245646896879204	-13.903770373316322
14.0	3.2080991276439375	18.917039611706354
14.0	-11.113268736564205	23.64510335114558
14.0	-5.664445470427872	-5.818991534725585
15.0	-0.8856892511959186	-0.36263028240328193
15.0	0.8823834121452968	-0.4197831466495317
15.0	0.0033058390506140838	0.7824134290528014
16.0	-3.1643604533730283	-0.25550689992811404
16.0	2.0821732750467223	-0.8463829171185363
16.0	1.9688746150436147	-0.3318740114126929
16.0	-0.8866874367173005	1.4337638284593222
17.0	-3.3895078884976653	2.030452019965935
17.0	0.09729263251261293	-3.350496115508605
17.0	2.0121866134732844	-1.9551988232935713
17.0	2.1056950961079464	-1.6373793713717397
17.0	1.0401229176606455	2.2148942826526596
17.0	-1.865789371256832	2.6977280075553325
18.0	-0.6413435974560624	-2.703613655147276
18.0	1.4410292365108082	0.32172218752496373
18.0	-0.7996856390547457	2.381891467622312
19.0	-0.08495645718282464	0.41325530001628275
19.0	-0.11849840387040303	0.3848269139919522
19.0	-0.04962939721099726	-0.4183520001311712
19.0	0.25308425826423764	-0.37973021387707206
20.0	-1.6136797094601145	-1.648215165724268
20.0	2.250449000273743	-2.147378772046192
20.0	2.8183323881043654	2.788318515608224
20.0	-3.455101678917991	1.007275422162207
21.0	2.884381227101011	0.13588966793878668
21.0	-1.6088556539824528	1.9862104081261314
21.0	-1.609180458549135	0.7861401410019895
21.0	0.3336548854305939	-2.9082402170669206
22.0	-3.0633834204473582	1.2467877403402237
22.0	-2.3098118791720705	-0.6153451974658559
22.0	1.249176150571305	-6.515435249405734
22.0	4.124019149048111	5.88399270653136
23.0	-1.059360314167419	-0.9447186375004417
23.0	1.3122789597134297	0.009469985886126802
23.0	1.3337051435297171	0.05456928939490537
23.0	1.2853257367956983	0.12113291852686381
23.0	-2.871949525871432	0.759546443692524
24.0	-3.0614543251971673	4.5319906319309435
24.0	-3.986055769873918	-5.85651240271218
24.0	3.7641803075995592	-6.524638684689133
24.0	5.848130091503449	2.951955618563474
24.0	-2.5648003040319227	4.897204836906912
25.0	0.7844165390067998	-1.0502294929222278
25.0	0.514019992532854	0.7097238006598601
25.0	-1.2984365315396382	0.34050569226237065
26.0	1.5460791649596937	-1.0067988272719852
26.0	-0.3613709499141996	1.0648892545830708
26.0	-1.1847082150454844	-0.05809042731106554
27.0	0.759444243821412	-1.2750723001372346
27.0	0.3033074339113176	1.3146074238174426
27.0	-1.0627516777327293	-0.039535123680204454
28.0	-0.7667507927619321	-0.47125826535756765
28.0	1.006047139077563	0.11547273165588565
28.0	-0.23929634631561503	0.3557855337016843
29.0	1.6735258292522073	0.3590932268117294
29.0	-1.9577027354213319	0.7785082639778992
29.0	-2.149676543683196	0.6872217997559749
29.0	0.7576793372193701	-2.120463709554758
29.0	1.67617411263295	0.2956404190091748
30.0	0.6887131337407332	0.05606832926011564
30.0	0.34765061130734837	0.30061656869517694
30.0	-1.0363637450480845	-0.3566848979552905
31.0	-0.49409266552079417	0.7546731981602166
31.0	0.451652491924868	-1.4475126124200066
31.0	0.04244017359591528	0.6928394142597992
32.0	0.6757370840798653	1.431940537792985
32.0	-0.44203771457132285	1.8663377910191747
32.0	-0.2336993695085426	-3.298278328812158
33.0	-0.8981212798456838	-1.2973898568696338
33.0	3.3810429789980203	2.83357004852941
33.0	-2.4829216991523375	-1.536180191659777
34.0	-0.5125455093409382	0.7385690230799954
34.0	-0.30444211671387605	-0.5960265554473867
34.0	0.8169876260548146	-0.14254246763259282
35.0	-6.019511372286102	10.97166781531088
35.0	-2.60224920498078	-6.264805749573334
35.0	-0.45582472433826465	-7.565492249728069
35.0	-0.021117786602122286	-7.45868804683659
35.0	5.47210852897456	0.3460628496584621
35.0	3.6265945592326942	9.971255381168627
36.0	4.347251762101393	-1.7793463220405297
36.0	-0.6813977878689139	12.090700015165547
36.0	-4.187248386775956	-1.678222769555003
36.0	0.521394412543486	-8.633130923570002
37.0	1.944219359482142	0.5159042930172077
37.0	-2.176745415082071	0.6513557320265143
37.0	-1.543819062404718	-1.3714704314697075
37.0	1.7763451180046197	0.20421040642597596
38.0	-3.9985185508091154	-3.2372664149188566
38.0	3.128999290371537	-3.5717388867190563
38.0	1.7106131329568255	1.9590688105355991
38.0	-0.8410938725192416	4.84993649110232
39.0	-2.9244251738536446	1.3775509803693757
39.0	0.19568953483741647	-2.8159050298855557
39.0	2.728735639016235	1.4383540495162075
40.0	-1.3770581022775086	-1.5803536655556816
40.0	1.036374615909764	0.08350906023284514
40.0	0.34068348636774143	1.4968446053228521
41.0	-5.064113237377904	-3.80582901094906
41.0	0.623228894764874	-4.097258323855019
41.0	8.02213013193004	-0.9084748507610713
41.0	-3.581245789316986	8.811562185565148
42.0	0.1864000672010594	0.1268179879167277
42.0	-0.16785155692126624	0.20236035931545518
42.0	-0.018548510279793144	-0.32917834723218287
43.0	2.784078822072635	4.6143739532790224
43.0	2.095126839264394	4.6293528788967135
43.0	-2.079264532406777	1.7039913560686066
43.0	-3.487118961890748	-6.857683849688797
43.0	-2.6020124022117193	-8.424091717555045
43.0	3.289190235172249	4.334057378999537
44.0	-3.2560178449545423	7.87662977551608
44.0	-3.620130309587522	-5.223760952663826
44.0	3.1312913975824235	-4.025280684757547
44.0	3.7448567569596376	1.372411861905306
45.0	-0.4506317012236873	-0.13494672521406165
45.0	0.4353568740670196	-0.49767149639529706
45.0	0.36501360869099025	0.3036017105126766
45.0	-0.3497387815343128	0.3290165110967123
46.0	3.484403004755063	-7.425667199112827
46.0	4.729453420201818	-6.351175727341703
46.0	2.9261144453750707	11.795628510943653
46.0	-11.13997087033195	1.9812144155108806
47.0	-0.5093967740869637	0.2869769969474797
47.0	-0.4481623688833516	-0.21478309978504764
47.0	0.18346063413487987	-0.8078039023599191
47.0	0.7740985088354279	0.7356100051974991
48.0	1.3974819234437872	1.3013058841343819
48.0	-0.4316475894109734	0.1595769275229642
48.0	-0.9658343340328025	-1.4608828116573547
49.0	-3.020171243537334	0.09006607444408941
49.0	0.14715367003112065	-1.498447345754938
49.0	0.6999793455280043	-1.2136623722577116
49.0	1.1729978324687276	1.2841455381574016
49.0	1.0000403955094832	1.3378981054111763
50.0	-1.5850088823060142	-1.0771053744515584
50.0	0.6712661763796922	0.157172076145567
50.0	0.913742705926316	0.9199332983059766
51.0	-1.9367543682621606	-0.2844037571761784
51.0	-1.9478732248557136	-1.8134898877116612
51.0	5.7927075865750695	2.257488835737402
51.0	-1.9080799934572183	-0.15959519084954235
52.0	-0.3980694019961121	2.124376045041908
52.0	-1.7493206228914304	1.7151382869186529
52.0	-1.8027481766325564	1.579396194550405
52.0	-2.1343556850060437	-5.407404565225829
52.0	6.0844938865261495	-0.011505961285142495
53.0	2.2359021012459093	-0.4673422617583284
53.0	-1.9298764186582393	2.8898224193864364
53.0	-2.1041885466683263	-0.584375401483531
53.0	1.7981628640806346	-1.8381047561446442
54.0	-1.6298969886398953	-1.6440926399871674
54.0	2.196446748545001	-1.4736197464841447
54.0	4.163751070520001	0.3054843332643406
54.0	-2.5145870199197513	3.9479175356671243
54.0	-2.2157138105053082	-1.1356894824601094
55.0	-1.119131729375663	3.6670896576226535
55.0	-1.6551452274945744	-4.026237776527346
55.0	2.774276956870229	0.3591481189047105
56.0	1.8128383935113719	1.4123873432027967
56.0	-5.543734879791873	0.7414367624981276
56.0	-6.088499166985921	-0.5287542988165732
56.0	1.2452560059092048	-2.024375245379624
56.0	4.263538545185991	-0.05989888634749691
56.0	4.310601102171224	0.4592043248427249
57.0	0.1533357232803117	-3.7991333199074817
57.0	7.484812198032881	-3.481987800773854
57.0	3.479850170766612	2.002676838937959
57.0	-5.304067345299188	3.213260074692067
57.0	-5.813930746780609	2.0651842070513093
58.0	-12.324032310697811	-3.775648902688877
58.0	4.287745222265653	-5.276014171988537
58.0	9.242392363424146	-1.8401542338613288
58.0	10.040997737565448	-0.30511734769012044
58.0	9.922907782078841	0.23939030045256296
58.0	-9.220498394650258	5.416105235488366
58.0	-11.949512399986105	5.5414391202879605
59.0	2.3582262517069497	0.06442072634367782
59.0	1.316805634113711	3.283727427328753
59.0	-3.4710645661291926	-0.06896856967051539
59.0	-2.5100162420718366	-1.96289795857882
59.0	2.306048922380332	-1.316281625423059
60.0	-3.1783895437257117	-1.0271512611495541
60.0	0.35771593818546005	-3.2857245085744773
60.0	3.3463600995605423	-1.5665902149168236
60.0	3.2463000634864256	1.5684548231111861
60.0	-0.8071698573538736	3.3541374458766744
60.0	-2.9648167001528796	0.9568737156529784
61.0	-3.679321631745894	-0.9926667467927341
61.0	-3.715052544873055	-1.1325737063200254
61.0	-3.000276298031322	-2.109668444110262
61.0	-1.3143810320678155	-2.0261136280871646
61.0	7.702990545139891	1.1997697175066828
61.0	4.498733170043274	3.0743811335986186
61.0	-0.49269220846509276	1.9868716742048973
62.0	-0.08996621295103013	-0.12091080937531558
62.0	0.11421361089116405	0.07049473773015974
62.0	-0.02424739794014418	0.050416071645165664
63.0	-3.5255230858354722	1.3452332929941238
63.0	-4.658834513688517	-3.882831805146531
63.0	2.7990370121844057	-2.7258886976051007
63.0	5.385320587339584	5.26348720975751
64.0	3.222843455804	-0.2743241934626304
64.0	-0.03175877089952642	2.263298887545243
64.0	-1.8847286605981761	1.3706467874686938
64.0	-2.6465023311711953	0.23876258912785148
64.0	-1.137814269801509	-1.1266407487675147
64.0	2.4779605766664186	-2.471743321911654
65.0	1.3675449288140433	-2.157757038986333
65.0	1.6647453750934593	-2.141870728241183
65.0	2.9004562237401723	2.8094508514441108
65.0	-1.1433341662428034	1.9313996566910894
65.0	-4.7894123614048825	-0.44122274090766533
66.0	0.03354631262224412	-0.3472036687679712
66.0	0.25246440536825904	0.37536546554393246
66.0	-0.2860107179905046	-0.0281617967759754
67.0	3.646932932616887	0.2951438912269281
67.0	-3.6388943854927294	3.409974922335964
67.0	-3.8865589341935984	1.9354344945883464
67.0	-0.5379786855127489	-2.561321711408947
67.0	4.416499072582186	-3.0792315967423196
68.0	3.2200553045113827	-4.622197920613214
68.0	2.559414956464169	-2.1360109309456283
68.0	-1.6319386016102135	6.902336831967036
68.0	-4.147531659365322	-0.14412798040819255
69.0	4.637445103902598	-1.73922742034333
69.0	-0.5793380728370677	10.211594258515499
69.0	-5.51492103400418	1.824702005392031
69.0	-2.6064390553412893	-7.181838987160235
69.0	4.063253058279956	-3.115229856403941
70.0	0.5148879804155848	-0.6171579161787434
70.0	-0.035162385033531765	0.5724765871159669
70.0	-0.47972559538205756	0.04468132906277111
71.0	-1.2559868377207906	-4.575159219895911
71.0	2.3205128283760224	-1.7488319678760582
71.0	2.149955326200843	0.8800180369125106
71.0	-3.2144813168560877	5.443973150859464
72.0	-1.469870354415752	1.9444822573990235
72.0	0.22261741097802273	-2.4182054607673313
72.0	0.35920076966062897	-2.2966923904412204
72.0	0.9380648317389777	0.7694302968804794
72.0	-0.05001265796186953	2.000985296928998
73.0	1.0755155925022089	1.2761951687045325
73.0	-0.7841140637196952	0.37979304495109584
73.0	-0.2914015287825088	-1.6559882136556334
74.0	0.4009026365374609	-0.13962567341750834
74.0	-0.5088097886712452	0.33311683359974326
74.0	0.10790715213378423	-0.1934911601822349
75.0	-0.5291933942687909	-0.7385915479522198
75.0	0.45565578529697065	0.2285378185203756
75.0	0.07353760897182023	0.5100537294318442
76.0	2.8226839386614575	-1.5754024861014686
76.0	2.197882308011342	2.3534605916923232
76.0	-5.020566246672791	-0.7780581055908665
77.0	2.580640589880357	-2.653900054609348
77.0	-0.47118311003958013	3.110901545258233
77.0	-4.16687957845561	2.7572715830108954
77.0	2.057422098614828	-3.2142730736597716
78.0	3.3553795618599542	1.7816266015190692
78.0	-2.26711258791214	0.970431805264386
78.0	-1.0882669739478013	-2.7520584067834615
79.0	-0.33705055281836316	0.7487575721868898
79.0	-0.4688236988754154	0.134939085962199
79.0	0.8058742516937877	-0.8836966581490758
80.0	6.279658598474838	7.886674006807166
80.0	-13.637494175868035	-5.923734924162217
80.0	-12.19921738788232	-9.084455097497619
80.0	10.908514230324803	0.24808993408009664
80.0	8.648538734950705	6.87342608077257
81.0	-4.904317972635865	-10.412488362002273
81.0	0.7186383325328587	-7.3210075502681
81.0	4.249898693414464	-3.1716655431370206
81.0	3.7056642758707214	8.951317334574046
81.0	1.8562037906921456	8.249394006420044
81.0	-5.626087119874313	3.7044501144132598
82.0	-1.6127599071890983	4.430104156011396
82.0	-2.142546493068793	-3.288259292590564
82.0	0.5481341673894365	-2.2906517810898372
82.0	3.207172232868462	1.1488069176690194
83.0	0.37063965732672804	2.231908902343368
83.0	-2.5084587252095627	0.5546258607947167
83.0	0.6285320206898746	-2.5426284159441983
83.0	0.9722013772557357	-2.4291163494212786
83.0	0.5370856699371855	2.1852100022274024
84.0	2.449179436916438	-0.2889890418793331
84.0	0.33251252867559034	3.2989422411787963
84.0	-1.5048705528765827	0.8800805473798184
84.0	-1.2768214127154576	-3.8900337466792734
85.0	-1.6453007096302192	1.358511476286353
85.0	-0.9035805432272198	-1.1152215253599094
85.0	1.9104468984268832	-1.5529956359639718
85.0	1.2197446909156253	-0.05185168566118591
85.0	-0.5813103364850547	1.3615573706987003
86.0	-2.890108638021735	2.7244948058197482
86.0	-3.03770518870515	1.2818499647052357
86.0	-2.0281583761488156	-1.412590448089392
86.0	3.719763069508637	-2.4019704578886616
86.0	4.236209133367066	-0.191783864546956
87.0	-1.4816587561604804	1.5014594449782357
87.0	-2.4633999077429736	-1.9749671202604486
87.0	1.2222394867119117	-4.429848113674419
87.0	1.5319797857963202	2.1714387571935703
87.0	1.1908393913951916	2.731917031763048
88.0	-2.6658371537342798	-2.889482025578249
88.0	0.09380053177379208	-4.955747113103395
88.0	6.011154040452664	2.7186250422329814
88.0	-0.33788689024257235	4.033069535111113
88.0	-3.101230528249593	1.0935345613375327
89.0	-1.1471902903102513	4.6190521107617535
89.0	-3.2226048915831407	-0.01809547872396922
89.0	0.6875316578336175	-6.226157451324475
89.0	1.9223374999928036	-1.5496019412332913
89.0	1.7599260240670263	3.174802760519975
90.0	-5.865760684587066	-1.415460702414792
90.0	3.0555893044683633	-1.8321118096767488
90.0	3.0546539737565133	-0.7175003101466157
90.0	-0.24448259363783434	3.965072822238141
91.0	-0.07553238225475452	2.657654859910397
91.0	-4.75809517039303	-3.082748482645007
91.0	4.833627552647758	0.42509362273457707
92.0	-0.15790156494440022	-1.8379405397221622
92.0	2.5142345855639405	-0.5967526654505466
92.0	0.9460174681425804	1.85770095719391
92.0	0.21005105174858574	1.7934194324648436
92.0	-3.5124015405106666	-1.2164271844860604
93.0	2.1951597079058813	-2.70201349781793
93.0	0.37213988127672804	2.484483094170732
93.0	-1.0914063810367451	2.6459029425535694
93.0	-1.4616421559047676	-0.3720227814231608
93.0	-0.014251052241083214	-2.056349757483226
94.0	2.095528656375669	-2.306871773982732
94.0	3.153444622023337	-1.3956755904596325
94.0	1.9354462835226238	2.4636852072414133
94.0	-2.7421701639439733	2.7154206301333312
94.0	-4.442249397977671	-1.4765584729323846
95.0	1.2940524181053965	2.5400469108321717
95.0	-0.0056014549223576664	2.3732503387443016
95.0	-2.81065119781101	-2.108735623036829
95.0	1.5222002346280032	-2.8045616265396607
96.0	-3.713446581553371	0.6802030650638485
96.0	-1.9893244854724388	-3.892339685345729
96.0	4.018861122066566	-0.5417106485985321
96.0	3.8922058618052398	0.5288531524696467
96.0	-2.208295916845972	3.224994116410694
97.0	0.32683547712760047	-0.9592863956200632
97.0	0.4952808614081664	1.636834008406222
97.0	-0.8221163385357875	-0.6775476127861655
98.0	4.4108306731270055	-0.7027105161807742
98.0	0.7802679085573738	2.0191430429964834
98.0	-5.674872821090331	2.9166516079524856
98.0	-5.229419709667657	1.4208839933020285
98.0	-3.27417965074969	-0.615541294484717
98.0	4.256731407575347	-2.9085747204971875
98.0	4.730642192248002	-2.1298521130882526
99.0	-0.62515720351516	0.8883447119676751
99.0	-0.027975635307062388	-2.435520026059142
99.0	0.6531328388222172	1.54717531409148
100.0	2.046749234110141	2.91119393387396
100.0	-2.8570956361881854	0.578317126270659
100.0	0.8103464020780501	-3.4895110601446038
101.0	0.14771798767233832	-3.309901852454493
101.0	4.414594983932889	-0.7347547618431135
101.0	-1.039319479593537	2.761917642387982
101.0	-2.4979096332977244	2.7202596562704358
101.0	-1.0250838587139728	-1.4375206843608122
102.0	1.7263961529759349	2.764244230229844
102.0	-2.3672751949616844	4.039355895025363
102.0	-4.255611651710868	1.0500221864737864
102.0	-0.9600810448917878	-3.084545413293055
102.0	0.3558214662553036	-3.278089400511504
102.0	2.728177280825989	-0.8880229274868374
102.0	2.7725729915071717	-0.6029645704375868
103.0	0.42635444130303374	1.5575451725487082
103.0	-0.0729931512143546	1.4678659174812687
103.0	-2.4170352220129945	-0.3912672702296792
103.0	1.0010938505020117	-1.3336363815342802
103.0	1.0625800814223367	-1.3005074382660549
104.0	-0.6281384810185211	-5.000469702572749
104.0	1.500110922657071	-4.811516816338399
104.0	6.343565966278593	1.2811423842154335
104.0	2.267062897284395	5.669655645699608
104.0	-4.519223546704108	4.393816546243138
104.0	-4.963377758497466	-1.5326280572470428
105.0	0.7755216692913073	-0.27482501019338473
105.0	-0.7238347882396149	0.9510071113566105
105.0	-0.5116898840045669	-0.12487915956287467
105.0	0.4600030029528705	-0.5513029416003801
106.0	2.0031702847778825	-1.1968738297061625
106.0	2.5223685229986628	-0.6744570874557055
106.0	0.2506363343649377	2.310968628213982
106.0	-4.7761751421414695	-0.4396377110521316
107.0	-3.47302756460501	1.838708636992669
107.0	-3.9371576408519213	0.6799499393530155
107.0	-1.8510960560629475	-2.788274953568322
107.0	-0.7727399530987742	-3.6617284510007835
107.0	1.0222821853733421	-2.1209699587491735
107.0	2.939931916148177	0.9762044671508351
107.0	3.1503468599762496	2.251764863980094
107.0	2.921460253120944	2.824345455841762
108.0	-2.588061940906139	-3.104885646966372
108.0	-2.3009055502688893	-3.9295649878456
108.0	-0.11318461705748202	-4.255555180925799
108.0	3.3993374628040844	5.930849330042778
108.0	1.6028146454284145	5.3591564856949905
109.0	-0.6829597236584445	2.5375470393775803
109.0	-2.159603415473858	-1.7731312582152596
109.0	0.7335002060282002	-2.219400242123428
109.0	2.341290339815605	-1.4436660809807638
109.0	-0.23222740671149358	2.8986505419418576
110.0	-3.858701180693545	0.0890102213696599
110.0	3.0239608476769773	-2.281880923328044
110.0	2.9169486527082626	0.6564604165985867
110.0	1.705571629457318	1.17401347719387
110.0	-3.7877799491489994	0.3623968081659421
111.0	-0.02351013425925854	0.3855631377074729
111.0	-0.13062330259430702	-0.17702090555993366
111.0	0.15413343685354647	-0.20854223214751388
112.0	0.4107206697686564	-0.6123583179797278
112.0	2.3321334150413024	3.013073079194561
112.0	-2.2083815326653866	-1.3627921271999355
112.0	-0.5344725521446039	-1.0379226340149221
113.0	1.3201827994702169	-1.1493916397561423
113.0	0.38083652523580014	0.28795257273382585
113.0	-1.701019324706009	0.8614390670223445
114.0	-0.0023758449592873785	0.7960465948073726
114.0	-0.07347464244647883	-0.37256414819401473
114.0	0.07585048740576619	-0.42348244661335793
115.0	-0.6781522243559412	-0.08613362707323023
115.0	0.32197600546341043	-0.45554099841588497
115.0	0.3561762188925308	0.5416746254891152
116.0	1.8175429305824586	3.4480322560036676
116.0	-0.20243445060695087	2.6078757401879384
116.0	-4.256567119562016	-0.240565072609795
116.0	2.6414586395864954	-5.815342923581804
117.0	2.705113161774463	-2.9453712019416525
117.0	0.6673518914790613	5.9347497604520205
117.0	-2.310590668897965	8.088740769497834
117.0	-3.4257606287697677	6.697610488734408
117.0	-1.3239363118555287	-6.692499762268406
117.0	1.1080873005004468	-6.143398941315598
117.0	2.5797352557692923	-4.939831113158634
118.0	-0.2544130176885179	-0.1942182333402983
118.0	-0.1957396736740352	-0.43766847014830224
118.0	-0.11462920668619508	-0.510970720445075
118.0	0.5647818980487626	1.1428574239336784
119.0	0.43841298206961227	-1.0165754005106264
119.0	1.037330661171251	1.6202809517909083
119.0	-1.4757436432408784	-0.6037055512802866
120.0	-10.424519693520141	-0.542507956294603
120.0	7.182526592552429	-6.19101294061528
120.0	10.652278789814103	-0.2523925346853865
120.0	5.15173158825392	5.6546608262993505
120.0	-12.562017277100315	1.3312526052959393
121.0	-0.0783283942069135	-4.89689355626791
121.0	5.48963878839459	-0.816043579516435
121.0	5.463785793816151	2.2362556991694524
121.0	0.8375242264596697	7.545399540053454
121.0	-5.906617788838802	-1.9327788447100154
121.0	-5.806002625624679	-2.1359392587285373
122.0	-0.6129862544258701	1.858509487546561
122.0	-2.3227564482794545	-1.3034270358953466
122.0	1.4832767704098493	-0.5120155078517171
122.0	1.4524659322954379	-0.04306694379948328
123.0	-4.55561680016523	1.920011663875647
123.0	-4.843874436848566	0.09436948910692973
123.0	-0.5644516033783032	-2.756583309268162
123.0	3.6941972532617537	-2.9317903965952756
123.0	3.787874298567187	0.5433783200190884
123.0	2.481871288563183	3.1306142328617526
124.0	1.325966896786961	0.2026217221741001
124.0	1.6039570009319746	1.0463555971323304
124.0	-1.925398082144703	0.9944111474074723
124.0	-1.0045258155742267	-2.2433884667138675
125.0	-1.1088144320909243	-0.36921400832234225
125.0	1.600515063903089	-1.5172291430380727
125.0	-0.4917006318121902	1.8864431513604518
126.0	-1.71369861185952	-0.8070497175314667
126.0	-1.673101623817266	-0.8582445633502312
126.0	1.054202714080566	-2.4695735588925825
126.0	1.8469417567477955	2.097011657465153
126.0	0.48565576484839346	2.0378561823091332
127.0	-3.127438502224464	2.6121212724648037
127.0	-0.4677601421435878	-1.4112867231376767
127.0	3.530684824221238	-5.17933827824799
127.0	0.06451382014681031	3.9785037289208676
128.0	-3.1406777038725875	-2.341006084078237
128.0	3.7091548575478166	0.11998191805290039
128.0	3.2159721269742505	3.700898903684905
128.0	-3.7844492806494614	-1.4798747376595904
129.0	0.42502462873893304	4.789174875129209
129.0	-2.2738254697928317	2.1679884214338667
129.0	0.9023867887629266	-3.5981575933409453
129.0	0.9464140522909524	-3.3590057032221545
130.0	-0.5873870021107103	-0.3070874061237317
130.0	1.2798264851043	0.32531178300010277
130.0	-0.6924394829935946	-0.018224376876357775
131.0	-0.8442054194653261	-0.524573950321309
131.0	-0.3544145161503209	-0.8608000145628053
131.0	1.1986199356156273	1.3853739648841106
132.0	-0.9342623761737461	0.6005294071599717
132.0	-2.5422224835020772	-3.4374986087880552
132.0	1.7854769622975595	1.296422096948524
132.0	1.691007897378256	1.5405471046795611
133.0	2.716156832522876	-2.6214617674337957
133.0	1.6698640302767545	2.940001100364284
133.0	-1.9134909945271446	0.5742207902645772
133.0	-2.472529868272486	-0.8927601231950655
134.0	-1.6010497378916397	6.097045850358577
134.0	-2.9391059102348756	-4.56638658630085
134.0	4.540155648126524	-1.530659264057723
135.0	-0.44219732572093756	-1.6518746453215334
135.0	2.3131849689820756	0.8457628325556191
135.0	-0.9642477639240651	2.398692672553923
135.0	-0.9067398793370803	-1.5925808597880362
136.0	-4.6390658182595805	-11.103781749479163
136.0	5.75037555709046	4.060092610520547
136.0	-1.1113097388308892	7.043689138958615
137.0	-0.14382923741505024	-2.8950369919316605
137.0	0.3185045628245817	-2.9937801133854536
137.0	2.7927817512345245	3.6618618940376155
137.0	-2.9674570766440906	2.226955211279523
138.0	0.34712082622451507	0.25287119227138155
138.0	-0.46997817549490317	0.5497013903243233
138.0	0.12285734927039138	-0.8025725825956906
139.0	4.601599055722591	-2.282166366362664
139.0	-2.18797055562734	5.823320179407845
139.0	-6.9540796645524345	-1.1071296677981552
139.0	4.5404511644571794	-2.4340241452470393
140.0	0.3345243325545912	-2.6158666659469003
140.0	4.776474465937698	-4.161648822887827
140.0	-0.48436271290189253	2.244358052337507
140.0	-2.259350515158362	2.278613605377123
140.0	-2.36728557043206	2.2545438311200616
141.0	1.2178089469278723	-0.05860149841271402
141.0	0.8816568825167884	0.6476514378378305
141.0	-3.2539908977999463	-0.32208414804691615
141.0	1.1545250683552624	-0.2669657913782196
142.0	3.5036901711086217	-1.7653801326804905
142.0	0.9600102730283412	1.4883257171535667
142.0	-3.539079375613922	3.5818884506692483
142.0	-2.771226543400986	-0.918380401605325
142.0	1.8466054748779457	-2.3864536335370095
143.0	-2.9388335713477427	0.24821785282448494
143.0	2.1567878612483535	-2.0709650243419055
143.0	0.7820457100993685	1.8227471715173964
144.0	0.10788322755560655	0.38832557641121285
144.0	-0.2536694896696389	-0.005634269345537707
144.0	0.1457862621140332	-0.382691307065661
145.0	-3.1379006945979824	-0.6658339432333703
145.0	1.143030784204354	-1.5645908009337004
145.0	1.994869910393626	2.230424744167081
146.0	0.993116746584832	4.513392934345316
146.0	-3.161732066542451	-0.3704101863670679
146.0	-0.2208935289828874	-3.8337517921670456
146.0	0.01691423971116382	-3.7725279608613222
146.0	2.3725946092293477	3.4632970050501153
147.0	0.3005575346108859	-1.711478863412154
147.0	0.48330489906741403	0.7651703156485121
147.0	-0.7838624336783094	0.9463085477636388
148.0	-1.605448733714984	3.034737511506357
148.0	-7.086648809874687	0.439830039268964
148.0	4.843498323725645	-2.876969969130161
148.0	3.8485992198640124	-0.5975975816451656
149.0	-0.4176988293604243	0.403977659921002
149.0	-0.49698219926272663	-1.0136783012804174
149.0	0.6313511763278247	-0.038028582598279174
149.0	0.28332985229535623	0.6477292239576841
150.0	-1.66029379440608	1.4865935148301312
150.0	-0.029203355870109048	-1.941715907918329
150.0	1.321212167532753	-1.8313827394107933
150.0	0.36828498274344473	2.286505132499002
151.0	-8.24762406567889	8.859215183517366
151.0	-5.774035618226453	-4.612338391245051
151.0	0.18008901590645834	-10.462778452699316
151.0	1.7921737864698823	-11.607339230865856
151.0	10.325708859974918	1.1763025889016752
151.0	8.395406792554057	3.2148151017463706
151.0	-6.671718770999987	13.432123200644718
152.0	-1.3410509983654741	1.306715389123866
152.0	-2.0982782856488305	0.12879164193196618
152.0	-0.7113787242443417	-1.2105403738226166
152.0	4.150708008258633	-0.22496665723320788
153.0	0.6713567658996008	2.311861784418715
153.0	-2.126694863692777	-1.659131861214541
153.0	0.10227775702566003	-2.290708086324381
153.0	1.3530603407675503	1.637978163120228
154.0	2.9423700990322117	-1.2066509171546542
154.0	2.639067991838289	0.5770181296058267
154.0	0.3496947576216584	2.83047746664959
154.0	-3.1684716339578087	0.9748580973625933
154.0	-2.762661214534369	-3.1757027764634085
155.0	4.710008274546986	0.9493972882166799
155.0	1.68698244769044	3.5522189706494656
155.0	-7.9770798142168715	0.025372267311047338
155.0	-7.979744842008939	0.018936079761314693
155.0	3.8439517802348155	-2.863374390462927
155.0	5.715882153753575	-1.6825502154755838
156.0	2.2351454275729914	0.14069413868481964
156.0	-0.8442389310950456	2.8782330277028074
156.0	-1.1918707770770116	2.475677432286021
156.0	-0.7815575540485343	-2.5702372856483473
156.0	0.5825218346476064	-2.924367313025329
157.0	-3.53776997817243	5.089118298181772
157.0	-7.018390504051939	-0.6292921779824163
157.0	-1.7862789663917265	-8.79167581620128
157.0	9.386919893669765	-1.4022546134423146
157.0	2.9555195549463478	5.734104309444238
158.0	-0.5640117026461617	-6.787392280820184
158.0	6.05448266379583	-3.772619333183662
158.0	-2.3184841410091406	5.636155320182628
158.0	-3.1719868201405186	4.923856293821205
159.0	-1.7047638162655339	-1.1181067487254546
159.0	1.9497967184229104	0.010848889947106111
159.0	-0.24503290215736453	1.1072578587783408
160.0	0.3473691690310475	-2.037548013520983
160.0	2.1823643377290676	-1.585059258110519
160.0	1.5248518847085182	0.9326791410687706
160.0	-4.054585391468639	2.6899281305627354
161.0	-2.5203524507799653	-5.315691448941745
161.0	-1.1472376577443177	-4.9839073154056655
161.0	4.7211841315272265	5.813800404531407
161.0	3.3886816967826943	8.333644186811695
161.0	-1.8106778068612053	1.3292210897426284
161.0	-2.6315979129243905	-5.177066916738304
162.0	-6.561000791244029	1.8094347549728125
162.0	-0.9361914778886432	-5.8489273469342065
162.0	6.793311535506101	0.9396976716599409
162.0	0.7038807336265519	3.0997949203014636
163.0	-1.065463924452149	0.8938358224206773
163.0	0.28831269270566773	-0.9441529995748922
163.0	0.7771512317464944	0.050317177154209004
164.0	0.4295926717104548	3.0796333380403538
164.0	-1.0851772635734904	-2.09714041450082
164.0	-0.15901606719312558	-3.8301074180603507
164.0	0.8146006590561514	2.8476144945207738
165.0	4.901288188269984	2.896314573725746
165.0	5.453720323809039	4.621914688248172
165.0	-7.616591676455498	-3.633323825386001
165.0	-2.7384168356235024	-3.8849054365878937
166.0	-9.524978678656883	-4.506836471547947
166.0	-8.449758830647365	-4.8732871388243995
166.0	6.374279728668115	-0.46353374428458294
166.0	8.962943361643285	3.460304172264559
166.0	7.576123045643798	4.37724306029008
166.0	-4.938608626650917	2.006110122102186
167.0	-1.7510179876710459	-0.4276995380182283
167.0	0.2759235376572219	-2.412471464355829
167.0	1.7066134327886018	0.9981142015970399
167.0	1.5648963079122649	1.1921957859027144
167.0	-1.7964152906870288	0.6498610148743187
168.0	1.008708184487035	-0.9706919711229107
168.0	0.4407892007099041	0.5649886535449125
168.0	-0.9813371392937916	0.5315325864574504
168.0	-0.4681602459031366	-0.12582926887944268
169.0	1.963048880324746	-2.3436026752338983
169.0	-0.24007457280529873	2.4875416668751673
169.0	-1.959528159586369	3.4417767730013673
169.0	-0.5757302900849617	-1.2437153839699366
169.0	0.8122841421518563	-2.342000380672743
170.0	-2.361397923442783	0.9808752752293519
170.0	1.0889688394184929	-3.0264453100737874
170.0	3.371734880139638	0.7635530684795097
170.0	-2.099305796115328	1.2820169663649474
171.0	4.174541351377468	3.819659545777119
171.0	-1.8441676414250188	4.303974090783261
171.0	-4.40248090410546	-3.51614652991482
171.0	2.0721071941529847	-4.607487106645586
172.0	-0.6514646892542261	7.120172442263443
172.0	-2.6058457186776756	8.003331539192326
172.0	-2.082121680223348	-7.867688206587472
172.0	5.339432088155243	-7.255815774868299
173.0	-0.047729129600793556	-2.3611682409881616
173.0	2.7276850216077824	0.8979013030162216
173.0	-2.6799558920070043	1.4632669379719405
174.0	5.677649370581085	3.1401427611146517
174.0	4.439307362076953	6.388327000131067
174.0	-1.5559173111617237	4.671339949932533
174.0	-4.74436845779341	-0.296702064513513
174.0	-3.1553705971321087	-6.13431425523748
174.0	-0.6613003665708512	-7.768793391427282
175.0	-0.0390334062015689	-0.0013783450126822875
175.0	0.024239806764064377	-0.08440180260024009
175.0	0.0147935994375054	0.08578014761291894
176.0	-1.4702040655699562	-2.783543305396998
176.0	2.216573172680145	-2.082864801607611
176.0	0.9480815250770855	1.6674918974893849
176.0	-1.6944506321872677	3.198916209515223
177.0	3.9597178160196025	7.052191595239089
177.0	-4.671898244233867	-2.586982639770402
177.0	-3.9625066450704947	-3.730279520662726
177.0	0.9929665249852886	-3.6851736323753763
177.0	3.6817205482994706	2.950244197569415
178.0	1.1820652409308314	0.8960007523399172
178.0	-0.03354551210348163	1.142533365071382
178.0	-2.4538453526325923	-1.8612046836799498
178.0	1.3053256238052464	-0.17732943373135499
179.0	4.164486838589224	-2.2216247517343928
179.0	-2.6915955563325866	5.820888634585061
179.0	-5.152541910508788	-0.6548290616207463
179.0	3.6796506282521446	-2.9444348212299345
180.0	0.14774755746540494	-1.4921815412701265
180.0	2.3176371871675108	0.16529870551631812
180.0	-2.597532073657967	2.818309103712017
180.0	0.13214732902506127	-1.491426267958196
181.0	0.09452156648572482	-0.5375006526495254
181.0	0.4850349305703392	0.767648491098688
181.0	-0.5795564970560355	-0.2301478384491765
182.0	-3.5619472068330684	-2.508268144938927
182.0	4.79845542870787	-0.1564690507724339
182.0	4.029155025642318	1.9375567406755823
182.0	-1.2018245583446654	2.1633213738071677
182.0	-4.0638386891724645	-1.4361409187713625
183.0	-1.6265453672063215	0.8617338431214525
183.0	0.7230449270276667	-1.8508734744133972
183.0	0.9035004401786498	0.9891396312919498
184.0	1.0741551884602003	-5.738741258927194
184.0	3.3384563267406127	-5.471490427147247
184.0	5.257698337786286	-0.4455072041184621
184.0	-4.219324797930118	6.391031055247063
184.0	-5.45098505505698	5.26470783494584
185.0	-3.7960648734334006	-1.605561313822009
185.0	-1.988908412549078	-3.361806369885022
185.0	3.9253814098328124	0.41334589843043656
185.0	2.415543018262021	2.2009163419107285
185.0	-0.5559511421123897	2.3531054433658967
186.0	1.3286181416785716	0.23327299555727485
186.0	-1.430022915776754	1.3585721872557017
186.0	-0.6640137339979844	-0.18696105592225096
186.0	0.7654185080961583	-1.404884126890737
187.0	-7.908864475687242	12.144759183595044
187.0	-5.639929756700178	-2.608491182991507
187.0	3.3175386862573277	-12.559365664037925
187.0	4.5696902058455064	-13.319280849854676
187.0	9.00591294390536	3.4962329930139524
187.0	-3.3443476036207787	12.846145520275119
188.0	-4.546633380334222	-2.1924792384913667
188.0	8.495573616983796	-2.4454215697225794
188.0	2.5878754786221827	3.975654664461353
188.0	-6.536815715271742	0.6622461437525531
189.0	1.7869615631821343	1.4649984068596653
189.0	-0.07870621857158028	1.2531912297675922
189.0	-2.9642057686275107	-1.750909453959089
189.0	1.2559504240169581	-0.9672801826681617
190.0	0.25919954751829494	0.6553694375485739
190.0	-0.8747653529446824	0.532334220839475
190.0	-0.9180575077596859	0.40058701769919025
190.0	1.5336233131861	-1.5882906760872215
191.0	0.7353838914516226	1.7246542732784855
191.0	-0.5332873195494331	4.399553276441699
191.0	-2.5703734372902716	0.1187291993890609
191.0	2.3682768653880784	-6.24293674910922
192.0	-2.54533191449244	5.677149775016316
192.0	-0.33236733173410704	-5.9260392126040955
192.0	0.7418681164601454	-5.248538629248519
192.0	3.4080810357484963	-0.33272499168679637
192.0	-1.2722499059820906	5.830153058523079
193.0	-0.707262753485114	-0.1391118195577119
193.0	-0.13021768504264986	-0.3942212080734325
193.0	0.6791041125134757	-0.046042391323635426
193.0	0.15837632601428697	0.579375418954772
194.0	-5.144619891457082	-4.692759082760851
194.0	1.4573709437314033	-4.946844478453738
194.0	2.990032731817325	-3.2200261997605373
194.0	3.4883132411828703	0.7967557743794045
194.0	1.9649344084445985	2.7247299947135275
194.0	-1.233752899633974	4.463140340069034
194.0	-3.5222785340851153	4.875003651813133
195.0	-0.35679379177057	-1.6157906778015492
195.0	2.9793067995133575	-0.25219020190155883
195.0	0.27923558331848597	3.1007548465518644
195.0	-2.9017485910612817	-1.2327739668487447
196.0	-0.7304952557942543	-1.105429397822217
196.0	1.748702976646961	-2.040645993524126
196.0	-0.35058905576103083	1.6215223133421652
196.0	-0.6676186650916679	1.5245530780042202
197.0	1.9262799097220262	-1.1919919739143026
197.0	0.9368047607947129	1.6853857776330365
197.0	-2.863084670516739	-0.4933938037187341
198.0	1.3795537383829726	-0.29734363278106535
198.0	-0.8864321648282099	0.625626629513765
198.0	-0.49312157355476377	-0.32828299673268546
199.0	-0.3466961140667684	0.8162981741665792
199.0	-0.002829271433286191	-1.3665833508038614
199.0	0.53231098089015	-0.9694651990501681
199.0	-0.017948387794693484	0.7055288368661554
199.0	-0.1648372075954145	0.8142215388212929
200.0	-10.003306317280494	-1.9064664352713827
200.0	-2.1427472417621862	-4.523299297153431
200.0	5.766430842454749	-2.697071938969477
200.0	4.052243257823085	3.5851525081865385
200.0	2.327379458764838	5.541685163207776
201.0	0.1677540911307984	0.4704150792771968
201.0	-0.9781264511996355	0.4763501860571826
201.0	0.8103723600688378	-0.9467652653344079
202.0	-1.311652494532164	-3.2745785539033365
202.0	2.0113543309072	1.470343333461022
202.0	-0.6997018363750346	1.8042352204423135
203.0	-0.8416992524017473	0.5613841871172537
203.0	-0.9912487334010375	-2.163337359370481
203.0	1.8329479858027848	1.6019531722532272
204.0	0.32624469985754956	-6.351993937861417
204.0	5.606729985545469	4.064158554013335
204.0	3.6770614976726814	4.3518079392909685
204.0	-9.610036183075698	-2.063972555442884
205.0	6.153421426407827	1.7531783625074724
205.0	-3.5889081947521277	2.801550394671813
205.0	-8.240158497884002	1.123173500901944
205.0	5.675645266228304	-5.67790225808123
206.0	-4.5896898067411565	0.172000466420955
206.0	0.3485143328217736	-0.8671735012020263
206.0	2.4226391608503937	-0.17744392039732995
206.0	1.8185363130689964	0.8726169551784142
207.0	0.2401131863599561	-0.22488068973843864
207.0	0.1991543558314348	0.1784527427105
207.0	-0.43926754219137937	0.04642794702791169
208.0	2.5243205532914614	4.146743372537037
208.0	-3.232758426867576	1.539435134739752
208.0	-8.118125034621844	-2.9403023533674224
208.0	-3.3189179946076166	-7.4233651693191165
208.0	7.181240170055249	0.8988441220140656
208.0	4.964240732750344	3.7786448933956596
209.0	0.1476424910470332	0.9142128812401369
209.0	-0.43312693465044666	-0.06851452343569416
209.0	0.28548444360340364	-0.8456983578044126
210.0	-6.849456535784799	0.2528005867232621
210.0	3.943877530254659	-4.210187555827135
210.0	6.302630862413996	-3.438308480811255
210.0	4.018322643628078	6.220489006469951
210.0	-7.415374500511912	1.1752064434451588
211.0	0.31319413737021806	-1.210757459845402
211.0	0.7676625812307859	-0.15548318330140995
211.0	0.5679245082296056	0.38203886505697987
211.0	-1.6487812268305955	0.9842017780898317
212.0	-2.9317371940328965	3.484329618957636
212.0	-7.777111648138761	-6.141070704909672
212.0	-7.64376811844935	-6.181747402849815
212.0	9.520874839771588	3.300826387318895
212.0	8.831742120849414	5.537662101482961
213.0	-6.771812667058455	4.341344939680902
213.0	-7.150098440363861	3.9557427973509274
213.0	1.280065803908131	-5.54763431186356
213.0	5.519634265966478	-4.927615437659079
213.0	7.122211037547672	2.1781620124908048
214.0	0.014987567187723125	-0.6032634235174512
214.0	0.5367883352371036	0.24910248927452336
214.0	-0.06611802987875749	0.9697032105078751
214.0	-0.4856578725460667	-0.6155422762649441
215.0	-3.5342531787921225	-4.204026617910281
215.0	-2.5407016018434225	-4.349194271117324
215.0	4.624825154363386	2.3980852750166424
215.0	4.441038293273054	3.840605630574239
215.0	2.1999493096380043	4.180219985089364
215.0	-5.190857976638901	-1.8656900016526423
216.0	-1.4102215008507732	-0.9027778271695371
216.0	1.44073367293484	-0.2092546677619208
216.0	1.5844311103916584	-0.08748719635701692
216.0	-1.6149432824757268	1.1995196912885042
217.0	-4.605091893016174	-2.577046174455767
217.0	-3.187943457592811	-4.155269763208591
217.0	1.3107873705046778	-2.9983604677706768
217.0	3.3985871246288624	2.258982541313926
217.0	2.3408708923542263	3.660592865414908
217.0	0.742789963121198	3.811100998706198
218.0	4.325530504774725	5.711812424218133
218.0	-9.127619710780085	7.329253126040839
218.0	1.0942601757835813	-6.956842775208612
218.0	3.7078290302217876	-6.084222775050348
219.0	1.1726164335260736	0.7867813340503179
219.0	1.3121381171720303	1.3774329654378161
219.0	-1.2058364902493819	1.398729779055956
219.0	-0.9368954724925135	-2.0607151152817154
219.0	-0.3420225879561602	-1.5022289632623438
220.0	1.3699779233450116	3.0338329063921217
220.0	-1.5325121339673777	0.891115205306215
220.0	-1.0058901174882213	-2.0792637059134043
220.0	1.1684243281106101	-1.8456844057849509
221.0	-0.5099579892754681	0.5553174293541867
221.0	0.5978395108712328	-1.3500877037606058
221.0	-0.08788152159577442	0.7947702744064317
222.0	-2.636390318525614	0.0032047819301437622
222.0	1.491065028408382	-0.755761048235803
222.0	1.1453252901172593	0.7525562663056665
223.0	1.8974031217745702	-1.4518390456181087
223.0	1.9672048448965818	3.0712647717707755
223.0	0.4095479656653498	2.5653618377945007
223.0	-2.309443578702752	-1.772518677002139
223.0	-1.9647123536337967	-2.4122688869449926
224.0	3.833316806886782	-4.498263135605317
224.0	5.527848392798853	1.0466355816217845
224.0	4.879130945452859	4.334691882343449
224.0	-6.706420747893086	5.822564320993485
224.0	-7.533875397245405	-6.705628649353395
225.0	9.380491439595644	-3.2305656310794144
225.0	2.3551550899106677	5.303364971874211
225.0	-7.977876597603061	1.4422173085121506
225.0	-7.334232232922006	0.46836073070783796
225.0	3.5764623010187178	-3.9833773800148284
226.0	0.34777912101729946	-0.25188164967875337
226.0	-0.14727136543411656	0.24416923452460346
226.0	-0.2005077555831966	0.007712415154175814
227.0	-1.535742520706946	0.691202763018868
227.0	-1.4533618027977209	-0.8639567673141635
227.0	1.6321816027108573	-1.5930421410401858
227.0	1.93526940541163	0.10937126185657224
227.0	-0.5783466846178071	1.6564248834789341
228.0	-2.307689810034786	-3.470804836606638
228.0	5.140723642694731	-1.4276308218498832
228.0	5.930199604492459	0.6273920451545935
228.0	-2.5220202314287428	5.8245605320313025
228.0	-6.241213205723604	-1.553516918729371
229.0	-3.1047179232607296	0.6789747224771101
229.0	3.4753461027907835	-2.8041597570208157
229.0	3.5837299825807776	-0.22526207844192805
229.0	-3.9543581621108537	2.3504471129856106
230.0	-6.786257169690919	3.4124171854974774
230.0	1.0396059093861472	-5.904764064569463
230.0	2.8879135193760797	-1.1384206399516803
230.0	2.622592563500732	0.7163822426148795
230.0	0.2361451774279928	2.914385276408801
231.0	0.1328660673337076	-0.016921178062837067
231.0	-0.09311802638736193	0.0721598131007548
231.0	-0.0397480409463479	-0.05523863503791009
232.0	-2.299604931942022	0.24122682294170242
232.0	1.212366053255659	-1.7255620667858034
232.0	1.087238878686363	1.484335243844108
233.0	1.6524107043802234	-0.5668782494699734
233.0	-1.0334555519769166	1.0416205154504492
233.0	-1.042120763659831	0.903492863988353
233.0	0.42316561125654595	-1.3782351299687865
234.0	-0.2570734545027502	-2.9450386129732538
234.0	2.5041708198490475	-1.691006042993613
234.0	1.494681173036821	1.9722086515080568
234.0	-3.7417785383831057	2.663836004458819
235.0	-4.133243125958037	1.8996111487299536
235.0	0.08727525564864923	-5.063421946619368
235.0	0.18081812313425266	-5.141810528153228
235.0	3.4398519813586224	3.375777705011317
235.0	0.42529776581648804	4.929843621031339
236.0	0.2412385894117795	-3.672197790189233
236.0	0.7294954946926644	-3.208481895672824
236.0	1.795277675614701	3.030956340761596
236.0	0.3170705080206514	4.917211999750906
236.0	-3.083082267739783	-1.0674886546504163
237.0	-0.712364381666182	-4.807910403850048
237.0	2.1312019444581463	-0.32917071535024867
237.0	-1.4188375627919247	5.13708111920029
238.0	2.65738915135249	-2.420736844471546
238.0	-0.05313510885359759	1.8825288501144302
238.0	-0.3158425862616144	1.8840002434982028
238.0	-2.288411456237291	-1.345792249141083
239.0	0.7382798238784454	0.2778750353582213
239.0	-1.3579961471104212	-0.1676708401668586
239.0	0.6197163232319804	-0.11020419519137614
240.0	2.217122126172001	1.142215405961252
240.0	0.09779377091966673	2.362014643069136
240.0	-2.180524007847445	-1.0803434913850574
240.0	-1.8712218389773798	-2.469048864007486
240.0	1.7368299497331496	0.045162306362143204
241.0	3.205394782391602	-1.6487747672137032
241.0	-2.921880523632137	3.1990412496945004
241.0	-3.4671243185353844	0.3396507942173936
241.0	3.183610059775899	-1.8899172766981986
242.0	2.8326685860137255	-3.7106953309001933
242.0	4.507248030770294	-3.6900402388377653
242.0	4.781604486897088	-1.2029945491432366
242.0	-12.12152110368111	8.60373011888121
243.0	-1.1757426125370791	-3.2936382820182364
243.0	1.8980789081256675	0.27460805826946777
243.0	-0.7223362955886025	3.019030223748767
244.0	-1.5669705647890995	-3.6133057057022713
244.0	1.0098608690298334	-1.6663899193924292
244.0	3.155728691925891	2.981688943817701
244.0	1.7548673378204624	3.634372997105446
244.0	-2.642070463869512	2.140000722491818
244.0	-1.7114158701175586	-3.4763670383202414
245.0	-0.02651186047066275	-0.07893910799379208
245.0	0.03516232411691064	0.044135483906242653
245.0	-0.008650463646246125	0.034803624087549584
246.0	-1.0441124726536952	-0.7241481785578663
246.0	1.3431188907318163	0.5960565704835074
246.0	-0.29900641807809264	0.12809160807435785
247.0	0.6805474046187373	0.6042251637304589
247.0	-1.2033642409874965	-0.040093831173703166
247.0	0.5228168363687793	-0.56413133255674
248.0	-5.156696349571277	-0.65140284642788
248.0	1.2238642036171017	-1.0342208974041138
248.0	3.932832145954179	1.6856237438319794
249.0	0.0002668224411176757	0.07750966856006428
249.0	-0.011739152989970593	-0.04604297553669865
249.0	0.011472330548858208	-0.03146669302337928
250.0	-0.7374192808894943	-0.23698064996356044
250.0	0.7559742232176881	-0.6661535047685658
250.0	-0.018554942328189387	0.903134154732111
251.0	-2.4240435944695897	-0.932103236277432
251.0	3.54668983819462	-0.8550133150396347
251.0	-1.1226462437250087	1.7871165513170528
252.0	3.747626129361257	-1.6540747992634723
252.0	-2.4358328862341576	3.053167141380882
252.0	-2.9308229071449112	2.407386026954
252.0	1.6190296640178112	-3.8064783690713937
253.0	4.418730411397165	-4.708146476545814
253.0	-2.9343996924282325	5.54856112551592
253.0	-5.603843571893949	3.8475950106341634
253.0	4.1195128529250145	-4.688009659604286
254.0	1.895986305146257	-3.013759104074756
254.0	3.7414929687969214	3.849840645727291
254.0	-0.2196941585168507	4.340905758061818
254.0	-3.6471954784513088	-0.87527087610377
254.0	-1.7705896369750382	-4.301716423610588
255.0	0.3458156360882924	-0.6204302609332449
255.0	0.12412646460329839	0.5233064105401792
255.0	-0.4699421006915784	0.09712385039308813
256.0	-1.9453601693707183	2.8906846544189784
256.0	-0.6569747177556359	-2.0799751921805485
256.0	1.2725264429093048	-0.5044126004864223
256.0	1.3298084442170293	-0.3062968617519849
257.0	-0.6201219394655805	4.4092013550536455
257.0	-4.305971944343024	-0.7394721905367245
257.0	-0.6666817571007632	-4.233148800035943
257.0	3.3551882781837987	-0.6986844898537331
257.0	2.237587362725541	1.2621041253727123
258.0	-5.873091594986229	3.246275429820667
258.0	-0.11625980751708044	-2.4060386788204493
258.0	1.6612574733676373	-3.6072359561267393
258.0	4.878200450301399	-1.952379965049667
258.0	-0.5501065211657136	4.719379170176213
259.0	-7.843374720011439	-0.8484869562414298
259.0	4.315465590253772	-3.2576164589367527
259.0	7.765187415596559	-1.2927568555423774
259.0	5.419233224228559	2.821000388740725
259.0	-9.656511510067451	2.5778598819798364
260.0	-1.7454475088682524	-0.10042896199511424
260.0	0.4020337326912628	-1.2902546690901189
260.0	2.5276565344429582	-1.688385757146647
260.0	-1.1842427582659625	3.079069388231893
261.0	-1.848717078158006	-0.1183083078288212
261.0	-0.03590477564839168	-0.8196865804359412
261.0	0.9878105025313284	0.4174990871017521
261.0	0.8968113512750359	0.5204958011630368
262.0	-0.6084785206400578	3.7208216471978557
262.0	-1.290770323805722	-1.2046999826216045
262.0	0.6396354972379478	-3.5792765406557483
262.0	0.9832691992270078	-3.3588683144307
262.0	0.27634414798082396	4.422023190510229
263.0	-0.007747257957941279	0.018327538987895544
263.0	-0.019698245933461644	0.0023024589365269825
263.0	0.02744550389138788	-0.020629997924382637
264.0	-0.12869632708757256	0.11497492207130917
264.0	0.06271287943179495	-0.14893390989587124
264.0	0.06598344765576314	0.03395898782454813
265.0	3.9197371929433835	-6.277570152225158
265.0	5.450655181107738	-2.15028357787129
265.0	-9.37039237405113	8.427853730096436
266.0	-2.1864016518201854	3.183809241944098
266.0	0.057472730229904546	-6.100129059850825
266.0	4.0020845153966755	-0.32118910655925675
266.0	-1.8731555938063729	3.237508924465986
267.0	0.030647277443679167	0.7086051864876323
267.0	-1.0728607130280587	-0.2557537880014125
267.0	1.0422134355843788	-0.4528513984862182
268.0	1.1536512517323236	1.7610687135176175
268.0	-1.4421295922816013	0.3791634751181666
268.0	0.2884783405492919	-2.1402321886357596
269.0	-1.5680822558155418	0.1454104649402556
269.0	-0.6122005759679373	-1.5342115653572708
269.0	1.557193528894874	0.4672478437965428
269.0	0.6230893028885894	0.9215532566204971
270.0	-0.657199997739951	0.5354839152681324
270.0	-0.19293201625300793	-0.5839759271004199
270.0	0.26001539862145884	-0.6319105484936994
270.0	0.5901166153714642	0.6804025603259378
271.0	-0.22016178909814998	0.505365583955822
271.0	-0.06179176031172517	-0.4069983358998681
271.0	0.09823976868250167	-0.4930199781741262
271.0	0.18371378072738886	0.39465273011816815
272.0	-1.7223681811158824	0.6119777528472128
272.0	1.1548787062550643	-1.1976821744299553
272.0	0.5674894748608181	0.5857044215827426
273.0	-0.16713091445444306	-0.5496788127685627
273.0	0.6207939993413282	0.07712960013960801
273.0	0.5387629258394184	0.6110717918864457
273.0	-0.9924260107263164	-0.1385225792574852
274.0	1.5210974436158686	-1.6558726660787555
274.0	0.25507030311454376	0.938056872705099
274.0	-0.8876813834641933	0.6118226329091432
274.0	-0.8884863632662159	0.10599316046451146
275.0	-0.137405870127292	-4.509007406576108
275.0	1.6130453338038953	1.7571089565936668
275.0	-1.475639463676609	2.751898449982426
276.0	-3.2275704189488943	5.57867924485953
276.0	-4.69095105918033	2.9066936013776883
276.0	1.0102961813628355	-5.570500783679683
276.0	3.010125320908991	-6.201609802498855
276.0	3.898099975857419	3.2867377399413202
277.0	-1.2183364367786507	-0.863260778962864
277.0	-0.5291632301330853	-1.2614341251642913
277.0	1.4757908171530587	-0.6756793848068869
277.0	0.27170884975866716	2.8003742889340426
278.0	3.155194761414275	0.9978835546067235
278.0	1.317444140221426	1.3652071638463026
278.0	-4.472638901635693	-2.3630907184530376
279.0	3.0920640748656747	3.476249398512173
279.0	-1.7844337569781308	4.446291926677454
279.0	-3.5027426435226348	-3.6311937780350085
279.0	-1.6010664722821093	-4.208532657086754
279.0	3.796178797917172	-0.08281489006786957
280.0	-1.5353540373479277	3.875789118593984
280.0	-3.8443235548772843	-2.512804063243032
280.0	-2.5737635904933436	-7.049610229288879
280.0	4.7362508951285145	2.3954251645019955
280.0	3.2171902875900344	3.291200009435935
281.0	1.2692084592177142	-0.4052094111582388
281.0	1.5047976074177696	0.0946991147859834
281.0	-1.7476891939111865	1.5865270422024946
281.0	-1.0263168727242664	-1.2760167458302458
282.0	-0.17613300636841295	1.0973099399520005
282.0	-1.8325648737205846	-0.1664842360744466
282.0	0.9911179114201721	-0.6130350424756905
282.0	1.0175799686688436	-0.3177906614018753
283.0	1.4004521592713843	-1.7163077613435398
283.0	1.6700736160754588	-0.5153475084153974
283.0	-0.2636592899572328	2.245327104911307
283.0	-2.8068664853896235	-0.013671835152360439
284.0	0.17190105093021138	-1.3429405877866147
284.0	0.8200359972709099	0.6200535508321648
284.0	0.2820190679836037	1.2322874638492496
284.0	-1.2739561161847228	-0.5094004268947931
285.0	1.7726163903268872	-0.2814642387841342
285.0	-0.9457707163156813	0.62987306319921
285.0	-0.943477432697257	0.5261783427105399
285.0	0.1166317586860483	-0.8745871671256135
286.0	-1.9307498514329182	-0.9733858220919548
286.0	6.218869840123543	-0.5157536579491913
286.0	-4.288119988690617	1.4891394800411335
287.0	-0.8709351872555333	1.9385186857221097
287.0	-0.3169954504344095	-1.2374687756225757
287.0	1.1879306376899372	-0.7010499100995208
288.0	1.0688950173805332	0.7144662194402988
288.0	-0.5086127927734867	1.4342245858131073
288.0	-0.7505290823677873	-1.1829704309063622
288.0	0.19024685776073236	-0.9657203743469932
289.0	-0.053885552906251584	-0.10885033826577303
289.0	0.07011586451778377	0.020612662660493702
289.0	-0.016230311611531437	0.08823767560526515
290.0	0.39103239587698985	1.7875919110960223
290.0	-3.2753918730205593	0.8746427461885207
290.0	-0.634747242585635	-1.7101186464591485
290.0	1.7591708751993542	-0.6455541446602393
290.0	1.7599358445298785	-0.30656186616516434
291.0	1.0260926219077242	0.037057346012912544
291.0	0.3279568686842393	0.9603675025979309
291.0	-1.9837478683058911	0.35242681528275177
291.0	0.6296983777139353	-1.3498516638936138
292.0	0.005039653793799593	-0.00011089511346645389
292.0	-0.002891588215404736	0.0021758249599772577
292.0	-0.002148065578391152	-0.0020649298465047405
293.0	-0.2688487223267659	0.3434668256069201
293.0	-0.2440424139655386	-0.2675730048015164
293.0	0.5128911362923174	-0.07589382080538525
294.0	-1.0248905447445578	0.15727938313633502
294.0	0.5854423329347631	-0.3173378905741805
294.0	0.4394482118097983	0.16005850743784392
295.0	1.2102856387422163	0.09235999095318198
295.0	1.2039994829486418	0.11217038889922372
295.0	-1.5887610412454005	0.32581045151415045
295.0	-0.82552408044547	-0.5303408313665179
296.0	2.6513951573759615	-8.096562294540997
296.0	5.483893746691914	-1.2575520657570047
296.0	5.100786127725548	3.3872757406959906
296.0	-1.3635419800907438	9.102576023598365
296.0	-3.4799630825893884	5.4128318019155675
296.0	-5.077258788042353	-1.4179202233469281
296.0	-3.3153111810709666	-7.1306489825649715
297.0	-1.043373375704165	-1.0792403847928633
297.0	0.8925295767049071	-0.6443245796270763
297.0	0.15084379899925796	1.7235649644199398
298.0	2.1169783510083944	2.7532642275601193
298.0	-1.3922353535101482	-0.006910555089626234
298.0	-1.3150765534397335	-1.2128324029557835
298.0	0.5903335559415022	-1.5335212695147147
299.0	-1.7341337765040548	2.982274338119832
299.0	-2.693798031187792	-0.7862760615609516
299.0	-1.7275408628265614	-2.135661122988212
299.0	3.0032083543205843	-1.0185028191080325
299.0	3.152264316197803	0.958165665537393
300.0	4.839825881055522	5.905512996810014
300.0	-4.220938056497665	2.7092744421934585
300.0	-2.670332023759642	-5.374102500757638
300.0	2.051444199201762	-3.240684938245851
301.0	-0.3306528308869679	0.07017144588207361
301.0	0.16715005889636503	-0.28633853678167936
301.0	0.16350277199059599	0.21616709089960173
302.0	-2.1032627973467974	-4.720211543212573
302.0	0.9665785081249463	-0.7091677963974284
302.0	2.3919147041045687	3.3745383149167107
302.0	-1.2552304148827191	2.0548410246932893
303.0	-1.2339189552529952	-6.0217029623069545
303.0	-1.0760656347554953	-6.357046451688432
303.0	-0.08759653480627368	-7.1725060724554375
303.0	6.758464503560975	-1.9749114206448144
303.0	0.6280055805732793	8.917489721132688
303.0	-1.6726957156134497	8.129610124952826
303.0	-3.316193243706057	4.479067061010083
304.0	-0.2895372996697714	-0.6285452490092587
304.0	0.2236154622799133	0.02262616516055521
304.0	0.06592183738982207	0.6059190838486765
305.0	-2.8703438642252443	8.130938563665183
305.0	-3.1524079948498205	-11.40685446919404
305.0	8.613634852943479	-6.40258709303553
305.0	-2.5908829938683984	9.678502998564397
306.0	-0.12715993112389215	-0.6552338342460863
306.0	0.5832933161279142	0.46252456429973215
306.0	-0.4561333850040353	0.19270926994634527
307.0	1.8240165923564864	2.4704584671959
307.0	-5.209711834978598	2.711119822965306
307.0	3.385695242622097	-5.181578290161181
308.0	6.046342326617116	1.2943205660006663
308.0	-5.727187847665741	1.13692312668477
308.0	-0.31915447895138144	-2.4312436926854377
309.0	-2.3727352510040087	-1.4158275703135945
309.0	-1.5618024807047857	-3.323668319536516
309.0	6.255195813735745	-2.046417067711072
309.0	0.14896732448689862	3.996198365423388
309.0	-2.4696254065139	2.7897145921377366
310.0	-0.71721166367253	-0.45158267889189646
310.0	1.233451773416995	0.11448757778893448
310.0	-0.5162401097444581	0.337095101102964
311.0	-0.017354763730115963	0.012603211935389517
311.0	0.0036085402289914997	-0.025723848787160768
311.0	0.013746223501134414	0.013120636851760504
312.0	-0.008713894594023839	-0.034122386245187125
312.0	0.044384332654039585	0.016834847727092664
312.0	-0.035670438060005895	0.01728753851809642
313.0	0.4207205264455806	-0.6960655357532527
313.0	1.2382671216520755	-0.22054150251049756
313.0	0.49665840711177467	0.42978777939810586
313.0	-2.15564605520943	0.48681925886563365
314.0	-0.07936837110375725	0.012474371803936452
314.0	0.005765125888326509	-0.0830278569678196
314.0	0.07360324521542906	0.07055348516391488
315.0	-0.11113720734216004	-0.27964370479170964
315.0	0.3990307085383803	-0.10501425771547405
315.0	-0.2878935011962158	0.38465796250719714
316.0	-1.4914482011843386	-0.9168301653509613
316.0	2.440721543416358	-0.2241385787271346
316.0	-0.9492733422320363	1.1409687440780691
317.0	0.43539651794450507	0.30319971502023835
317.0	-0.09609297454691654	0.27154155830585397
317.0	-0.33930354339759555	-0.5747412733260799
318.0	-1.5354199165556934	0.6098069193354254
318.0	0.10101874246209976	-1.1821587125768298
318.0	1.4344011740936082	0.5723517932414038
319.0	-0.346470503134217	-0.33437927223195635
319.0	0.2851420419208521	-0.28568935102775417
319.0	0.7789009894078721	0.0711794820777345
319.0	-0.7175725281944658	0.5488891411819655
320.0	3.7984337808113104	0.6673593698565787
320.0	-5.3013082460609295	0.6750925617427626
320.0	1.5028744652496129	-1.3424519315993384
321.0	0.14357282245119468	-0.1264449867433924
321.0	0.1998966826661309	0.1272431727005073
321.0	-0.3434695051173241	-0.0007981859571070451
322.0	-4.002474282004442	-6.432889729007545
322.0	4.394523372110961	3.989430774366006
322.0	-0.3920490901065154	2.443458954641541
323.0	-3.4747188950663848	-4.3352072518709965
323.0	-2.987719767960952	-5.015916459351005
323.0	2.9791510431631636	2.968439169993745
323.0	2.954001185974617	3.0041564453118395
323.0	0.5292864338895371	3.3785280959164257
324.0	-0.17237902758494747	-1.443678502377392
324.0	1.5906833062562225	-1.5239594769125744
324.0	0.27885935369482956	2.0361962232385302
324.0	-1.6971636323661028	0.9314417560514584
325.0	0.06015753959100098	1.3366771166619469
325.0	-0.7830278089267009	0.12416799816110573
325.0	0.7228702693356717	-1.4608451148230475
326.0	-3.2771210665233204	-1.6255402027130859
326.0	-0.4242468701987029	-1.757855650315669
326.0	6.983373916373403	4.893388302078722
326.0	-3.2820059796513847	-1.509992449049962
327.0	3.163582559222539	12.640305021108583
327.0	-6.595054635243885	-9.540622842275745
327.0	-1.5042234601638211	-8.796384232283536
327.0	0.7745699402661377	-6.271533420205419
327.0	4.161125595919031	11.968235473656131
328.0	-1.473681892093154	-2.3850045055264437
328.0	0.571318138960173	-0.9624095515267819
328.0	0.9023637531329537	3.3474140570532582
329.0	-7.572015150772399	-2.8453754565504683
329.0	0.3124465075849706	-6.286969591887634
329.0	7.27542903754083	3.480143710196499
329.0	2.8156056791918047	4.118775538816333
329.0	-2.831466073545209	1.5334257994252278
330.0	-4.471536291116121	-5.09131995530006
330.0	3.9221415772552057	2.152121885151605
330.0	0.5493947138609075	2.9391980701484433
331.0	-0.06829143860857113	1.0008963332077174
331.0	-0.4405970045574187	-0.10522268524893116
331.0	0.18958287149527744	-0.49155404066385033
331.0	0.31930557167072154	-0.40411960729490726
332.0	-2.1935981541527565	0.4393159140316665
332.0	1.4361168102299864	-0.6924255354407374
332.0	0.7574813439227893	0.25310962140909327
333.0	5.1082501136798575	-0.1456596328715443
333.0	-1.5801032824662222	2.2363940317232105
333.0	-3.2073991896583105	2.3202610459406943
333.0	-0.320747641555322	-4.410995444792354
334.0	0.49542419539820515	1.2370130669803003
334.0	-0.3964869094359415	0.6035225300894606
334.0	-0.6172929171040951	-0.2242363778466152
334.0	0.5183556311418459	-1.6162992192231522
335.0	-2.241964414261958	0.9738285588663975
335.0	-0.5514656222017051	-1.154895616499757
335.0	2.7934300364636653	0.18106705763335684
336.0	0.6190849859943843	4.492612249934479
336.0	-3.007905902069597	-3.0406449619186198
336.0	0.7706573331530582	-3.376848034510054
336.0	1.6181635829221592	1.9248807464942201
337.0	3.5998832858974783	6.8896947645715185
337.0	-0.7429624382593908	7.503105970757191
337.0	-6.722160990307397	-9.878744653875549
337.0	-6.516308841860679	-12.528627716368867
337.0	4.793524898445759	3.2007470702241343
337.0	5.588024086084218	4.813824564691553
338.0	-2.0345373900803536	0.2127492755429643
338.0	2.42650110158769	-1.110399317300249
338.0	0.9318110217170504	0.318922121980832
338.0	-1.3237747332244165	0.5787279197764335
339.0	-0.5938911295409872	0.880978174199285
339.0	-1.105361132358972	-2.216385916389162
339.0	1.6992522618999855	1.3354077421898591
340.0	0.732133043149326	0.13927201527301686
340.0	-0.17736699176004606	0.4033765813998123
340.0	-0.5547660513892636	-0.5426485966728409
341.0	5.002650044858715	0.11246026303727712
341.0	-3.998309761122763	2.9633317113054534
341.0	-1.004340283735941	-3.075791974342721
342.0	2.6240388192952806	-2.9506373981181575
342.0	3.438710973463191	-2.6314502936490616
342.0	-0.7656256417732429	4.868427692371765
342.0	-5.2971241509852405	0.7136599993954625
343.0	3.273904908475791	2.7994656182322006
343.0	-4.770398735858209	0.6171487001366678
343.0	-1.360860239714263	-2.272226664873683
343.0	-0.6087322989743694	-2.375556123200281
343.0	3.4660863660710257	1.2311684697051026
344.0	-0.07169752957792071	1.1574287824346141
344.0	-0.15517939707283784	1.0910511393865963
344.0	-1.0141425381677471	-1.2776826672624704
344.0	1.2410194648184936	-0.9707972545587328
345.0	-0.123325674274254	1.520322869256676
345.0	-1.1859823431512633	-2.166736162758852
345.0	1.324194632477525	-0.9772266758306278
345.0	-0.014886615051997976	1.623639969332793
346.0	0.9425420012378531	0.8077375075234171
346.0	-0.5884661371506655	2.315446687528868
346.0	-0.35407586408718617	-3.1231841950522803
347.0	-0.4415109696794829	0.9832903063287046
347.0	-0.4399877412665913	-1.512738667805671
347.0	0.8814987109460577	0.5294483614769466
348.0	0.3823210848510218	0.232861217334547
348.0	-0.3517492500009259	0.5666391246350471
348.0	-0.03057183485007474	-0.7995003419695915
349.0	1.4401675289434368	-0.2358967142699454
349.0	1.7851897302559	1.273737351622923
349.0	-3.66323073224926	0.26592089988412215
349.0	0.43787347304990903	-1.3037615372371076
350.0	0.7852084653067236	-0.13625600205903557
350.0	0.5022154164665539	0.2207867785552982
350.0	-0.07217372189686623	0.4776125855713532
350.0	-1.2152501598763954	-0.562143362067617
351.0	-4.036195135507854	-1.1560927234837592
351.0	1.0955672396263876	-1.5040243581894
351.0	2.2606436864144963	0.1029685154245236
351.0	1.3349932563853768	1.2803984581106829
351.0	-0.655009046918393	1.2767501081379777
352.0	4.500235044765558	-0.3327901044813855
352.0	-4.381866454168111	1.496930480891849
352.0	-4.4140082563410346	-0.483573125830255
352.0	4.295639665743586	-0.6805672505802085
353.0	0.9759808984263646	-0.5331503643924295
353.0	-0.23472651741917128	0.7399683224202595
353.0	-0.7412543810071897	-0.2068179580278299
354.0	1.547289551781171	-1.0855104845635686
354.0	1.8277991498221957	1.8513445643741249
354.0	-1.9962639479942743	0.32615882800566826
354.0	-1.3788247536090867	-1.0919929078162693
355.0	-3.9646477070621824	2.8150285576568734
355.0	1.7309268031788825	-4.828785301848399
355.0	2.2337209038833135	2.0137567441915145
356.0	1.2354002527018688	2.3159247020478473
356.0	-4.680693011794798	0.3613725657262142
356.0	3.4452927590929217	-2.6772972677741045
357.0	2.897622263033277	-0.15635069844237454
357.0	2.361755521795052	0.9308421410748949
357.0	-2.6357812426285663	-0.37697532229608016
357.0	-2.6235965421997753	-0.3975161203364474
358.0	4.559993492684971	0.3494595192827133
358.0	0.06305021874874149	3.211787742541756
358.0	-4.643315654164029	3.2562132060266933
358.0	-4.652042251513477	3.2500022663688686
358.0	-0.1573364043023027	-5.120346504835572
358.0	4.829650598546098	-4.9471162293844815
359.0	-1.3282124996015205	-2.3905118171030733
359.0	-1.1529113006644252	-2.4546927103535214
359.0	1.258771361789567	-0.043467217928358816
359.0	1.2465403381555777	1.1335584469760225
359.0	-0.024187899679140736	3.7551132984089266
360.0	1.2392334565572278	0.0476794793456318
360.0	-0.9310777144750318	0.5044837281422281
360.0	-0.30815574208216834	-0.5521632074878756
361.0	-0.0968308512652941	-0.697833993585023
361.0	1.1805484265120183	0.5435934682982348
361.0	-1.083717575246737	0.15424052528678184
362.0	0.7823790588846083	-1.1704365273856623
362.0	-0.3392491879252841	1.4057130738013603
362.0	-0.44312987095931794	-0.23527654641568516
363.0	0.024999014021922214	0.742371750877403
363.0	-0.5818828797059951	-0.3284973000697546
363.0	0.07478238609514842	-0.4600088900544258
363.0	0.4821014795889165	0.04613443924677861
364.0	-1.1738568321113245	-2.4185921424327135
364.0	3.551249092652343	2.115555691065357
364.0	-0.8667020900780027	1.248297179306807
364.0	-1.510690170463016	-0.9452607279394505
365.0	5.733968140273785	0.1886310976045506
365.0	2.6460807943477747	9.137424276078413
365.0	-4.3111352831268	-3.25725358648762
365.0	-4.068913651494747	-6.068801787195335
366.0	7.498562383013399	-5.711188797255083
366.0	5.284892785996852	0.7114504636782061
366.0	-4.140341086233143	3.177798645033505
366.0	-8.643114082777087	1.8219396885434112
367.0	0.08197952331848388	-0.11110967746432078
367.0	0.1290962601443326	0.19731162700507265
367.0	-0.21107578346281392	-0.08620194954073744
368.0	3.364382063901535	3.42235957150771
368.0	-2.915928245457977	-0.48440825682642624
368.0	-0.44845381844358484	-2.9379513146812752
369.0	0.07872342807657541	-0.11068333432222834
369.0	0.06447895770070289	0.12898222715178168
369.0	-0.14320238577728414	-0.01829889282953286
370.0	3.010799917848328	0.5865614335481655
370.0	-3.526944870825398	1.0332211268786768
370.0	0.5161449529770479	-1.6197825604268816
371.0	-2.3529689567627594	-1.4305841961425385
371.0	-0.28476833563565834	-2.2572365169953983
371.0	2.637737292398444	3.687820713137913
372.0	-2.780444009669279	6.83839545990748
372.0	0.20047090459498745	-5.931152009568653
372.0	4.410609021466967	-8.183471591590722
372.0	-1.8306359163926575	7.27622814125184
373.0	-3.2972282727248854	0.6893767254798625
373.0	-0.8447400458708538	-6.198716455050641
373.0	-0.28454723209451227	-7.299641381815852
373.0	3.2769548205433825	-7.032878477154647
373.0	2.8918944065110646	8.846178607207346
373.0	-1.7423336763641246	10.995680981333937
374.0	-6.329712295177737	-0.025659841267556174
374.0	-1.586988174986378	-3.4491172723908816
374.0	4.084753565250623	1.1870374568341662
374.0	3.831946904913491	2.2877396568242645
375.0	0.4376443471519114	-1.5931654175566006
375.0	1.6313313963623843	2.492171210864339
375.0	-2.0689757435143057	-0.8990057933077504
376.0	3.201638201729078	1.2959390306040894
376.0	-3.050373564666676	0.3015498248248619
376.0	-3.0822124095776835	-0.31400171622786927
376.0	-0.2802725176286304	-2.177047380120964
376.0	3.211220290143897	0.8935602409198647
377.0	1.4894124628207348	0.1220117149487884
377.0	-1.0304238750216508	1.2248185438523553
377.0	-1.2580844181591573	-0.7755758157809527
377.0	0.7990958303600603	-0.5712544430201965
378.0	-1.1262238892858085	2.7879823686738088
378.0	-1.5797841049584038	0.9626490965210984
378.0	1.4073930534512535	-2.6765346470984896
378.0	1.2986149407929792	-1.0740968180964114
379.0	-4.024191657205388	1.3661448812587302
379.0	0.814025578319502	-7.3596731433753355
379.0	3.4755772269428853	-9.024976896819572
379.0	5.1861984540626995	-0.6020824354382408
379.0	-2.3083222879651846	7.567397676096399
379.0	-3.143287314154505	8.053189918278063
380.0	-4.034489477728236	-0.5931174577859926
380.0	1.6561488509483557	-0.8003441597162
380.0	1.7275810636977218	-0.11076848861264117
380.0	0.6507595630821189	1.5042301061148298
381.0	-1.279654780505538	-1.153079381281209
381.0	2.3726997247995603	0.43085815100729363
381.0	-1.0930449442940264	0.7222212302739213
382.0	-3.2843951827107056	4.302509832083891
382.0	-3.5434846227524797	4.126696269166112
382.0	1.123210801618326	-3.4943691991191765
382.0	2.5620437361520674	-3.80006961162843
382.0	3.142625267692822	-1.1347672905024164
383.0	0.3505448353504334	2.009946298999127
383.0	-1.1497119574398902	-0.8399398717912349
383.0	0.7991671220894858	-1.1700064272078885
384.0	-2.811300463927475	1.4286630334003894
384.0	0.9876939329016252	-2.610360597097479
384.0	1.8236065310258298	1.181697563697081
385.0	-4.368442369644538	0.5916434739725599
385.0	-5.45053418845713	-0.5080313374111124
385.0	6.606633797183705	-2.8641370830933663
385.0	3.2123427609179553	2.780524946531907
386.0	0.4850630385104476	-0.7064431603044002
386.0	-0.16167866325095892	1.0728408998000516
386.0	-0.32338437525949876	-0.3663977394956622
387.0	2.107495795007264	0.6941252079204505
387.0	-0.8115462016362451	0.7873923989329522
387.0	-1.2959495933710343	-1.4815176068533995
388.0	0.20382791055263003	0.1708725878806424
388.0	-0.12683849412810608	0.21994252924193164
388.0	-0.07698941642449363	-0.3908151171225441
389.0	0.07349431004511164	1.124877754567939
389.0	-0.5855056807219735	-0.7469267077511158
389.0	0.5120113706768575	-0.37795104681681735
390.0	2.592674585951955	-4.9627411280824205
390.0	-1.9611721327020386	8.416448231839652
390.0	-2.247077115156475	8.109763847917637
390.0	-0.5769483336022719	-6.199826991175867
390.0	2.1925229955088614	-5.363643960499023
391.0	-1.0816128853029237	2.909746244125326
391.0	-1.4656757410345427	-0.8320008549745563
391.0	1.8365586377405374	-4.292268787562182
391.0	0.7107299885969275	2.2145233984114276
392.0	-0.07330930950904664	-0.06763296948739031
392.0	0.08493472492796965	-0.06547232452453886
392.0	-0.011625415418937163	0.13310529401193044
393.0	0.42097981993170974	-0.059560313390423454
393.0	-0.09485584895290493	0.1972709649080299
393.0	-0.3261239709788066	-0.13771065151759063
394.0	0.44658323765909735	0.6510790811987593
394.0	-1.1990895965313266	-0.5983144373041436
394.0	0.7525063588722185	-0.05276464389462507
395.0	0.930109752424388	-0.07639161399104101
395.0	0.5530465605927284	0.5910630716935246
395.0	-1.483156313017106	-0.5146714577024957
396.0	-0.17571564554455207	0.2780026614572648
396.0	-0.05532723682719834	-0.3223931482981102
396.0	0.2310428823717476	0.04439048684084324
397.0	-2.622065714588923	-0.1855285105427282
397.0	2.28295101198569	-1.6159777017852697
397.0	1.087873064773108	0.16973162004170117
397.0	-0.7487583621698785	1.6317745922863165
398.0	0.0936425128858862	-1.6740178789743987
398.0	2.3187412457027197	2.0557983447724597
398.0	-2.412383758588601	-0.3817804657980863
399.0	-0.3657429417789969	-2.489914132150287
399.0	2.40241107267199	0.6530919498215783
399.0	-2.0366681308929935	1.836822182328693
400.0	-0.021433371970502182	0.05052940272474676
400.0	-0.15815958048328718	0.0433785682370663
400.0	0.17959295245377957	-0.09390797096182786
401.0	0.20317186312242982	-1.1652348819890008
401.0	0.32814074967778056	1.091560015204638
401.0	-0.531312612800196	0.07367486678436966
402.0	-2.6673067292549004	-2.9773044100355786
402.0	-2.6493381702547545	-6.189542374265026
402.0	-1.8353582199719884	-7.387517801685937
402.0	4.794135015340537	1.452640764547986
402.0	2.9898539217628786	6.148950496310761
402.0	-0.6319858176218007	8.9527733251278
403.0	-1.0530217669923498	-3.1280246168745673
403.0	1.9504738631801133	2.0888302217801837
403.0	-0.8974520961877578	1.0391943950943705
404.0	-0.48301820618318414	-0.7118715982016781
404.0	0.22190792470831988	-0.8148683839387112
404.0	0.26111028147484944	1.5267399821404029
405.0	-4.792881045859351	2.110098679139168
405.0	-1.3901547060914619	-2.289839137391443
405.0	3.4741868749567217	-0.5425792752072832
405.0	2.708848876994092	0.7223197334595581
406.0	1.673651670119678	-6.0168227527453775
406.0	-0.2075253886249924	4.228421522687213
406.0	-0.2935870093584299	4.234830515579465
406.0	-1.172539272136244	-2.4464292855212917
407.0	0.5675532815470039	1.1251446729322805
407.0	-0.30958411311354805	1.35638202660716
407.0	-1.5486829547120171	-1.780652785660886
407.0	1.2907137862785547	-0.7008739138785576
408.0	-0.18026383749007752	-0.5186430217754338
408.0	0.37858568137937887	0.03542716021583854
408.0	-0.19832184388928897	0.4832158615596022
409.0	-1.4543402991268337	0.4032181887431767
409.0	0.3149011331411063	-1.9268613852206633
409.0	1.727369522540446	0.5820467484060639
409.0	-0.5879303565546677	0.9415964480714282
410.0	-2.2409880760935574	-3.7041093547796167
410.0	3.0827824452206753	-1.292740951652639
410.0	2.686536281723283	1.8057375750547153
410.0	-0.42794534109570165	3.9772288482958915
410.0	-3.100385309754695	-0.7861161169183652
411.0	0.07822448648442655	-0.0314359999613739
411.0	-0.03697204424584618	0.1252975064987994
411.0	-0.04125244223856492	-0.09386150653742184
412.0	-2.533861414711892	-1.83846065320053
412.0	5.558088730344501	-1.3742555963163348
412.0	-3.0242273156326385	3.212716249516848
413.0	-0.29093099186637394	-0.26248908802710447
413.0	0.4804860558474735	-0.6584909209155752
413.0	-0.18955506398111965	0.9209800089426785
414.0	-5.563228256686099	9.902728013762262
414.0	-10.948030079987639	6.730833266951017
414.0	2.84753827618308	-14.021719252440477
414.0	8.866022966763637	-9.640136479702175
414.0	4.797697093727028	7.028294451429374
415.0	0.9324157194452308	-0.6379114160323338
415.0	0.3946020188859868	1.2698458876508998
415.0	-1.3270177383312214	-0.6319344716185519
416.0	0.30719145464082886	-6.736461334340254
416.0	2.5898839253790022	6.757539785691594
416.0	-2.8970753800198223	-0.021078451351350835
417.0	-0.10083939987731412	-0.7095885734065469
417.0	0.6974147308183472	0.09907282121624313
417.0	-0.5965753309409929	0.6105157521903042
418.0	-3.9905146946909418	-0.7450551833868644
418.0	2.6306878627026866	-2.6794403497461032
418.0	1.359826831988257	3.4244955331329607
419.0	-3.3383612845276045	0.1852274010671121
419.0	-3.1783228941267447	-2.2443416059833705
419.0	-2.989719643038065	-2.4950375797301354
419.0	5.775414342558163	2.106610683932445
419.0	3.730989479134238	2.447541100713957
420.0	2.0395048032310457	1.2663371438750306
420.0	-2.1058053952497002	-0.17762470785759593
420.0	-2.2185617376821467	-1.9379049162021407
420.0	2.2848623297007644	0.8491924801847048
421.0	-1.940288964920936	2.1718159976480322
421.0	-2.836698836909189	-1.850365894169787
421.0	3.2102393100333186	-1.7681297404983154
421.0	1.5667484917968095	1.4466796370200636
422.0	19.430021121952432	-1.4729285839576822
422.0	-8.675122999041445	4.4244937053992475
422.0	-9.314178643480856	4.381493611379026
422.0	-10.262914886881084	2.9680322426312093
422.0	-4.461978678346473	-4.306823840842595
422.0	13.28417408579743	-5.994267134609162
423.0	0.05835552049907819	-0.27939866598504615
423.0	0.1573791650520963	0.27675727781777887
423.0	-0.21573468555113862	0.0026413881672442056
424.0	-1.9965994836044911	6.170126135610013
424.0	-4.877722660840131	6.11300963859924
424.0	-10.704670933260859	2.548842719144031
424.0	17.578993077705455	-14.831978493353317
425.0	-2.2375713872928964	-3.208152723612335
425.0	1.170788229469816	0.23007903101843796
425.0	1.0667831578230806	2.97807369259389
426.0	1.5669577334050118	1.0314297232679788
426.0	0.8551591439699396	1.4007340271156539
426.0	-1.5566974803930662	-0.2989038203103244
426.0	-0.9372295830586803	-1.019999654158077
426.0	0.0718101860768315	-1.1132602759151853
427.0	0.7473030874655796	-4.50648598714096
427.0	3.291458221318377	1.4374187958760831
427.0	-0.8589440111964404	2.1870786018596124
427.0	-3.179817297587549	0.8819885894052786
428.0	-0.17592734017444386	-0.397413179985829
428.0	0.4901795970659439	0.16000649028282973
428.0	-0.3142522568914967	0.237406689702998
429.0	0.0665538350221215	-0.07623742955624416
429.0	0.1090087654165267	2.9263902376849266e-05
429.0	-0.17556260043864846	0.07620816565386021
430.0	2.4345544811300335	-1.3601824263837345
430.0	-0.09063762386256498	0.8828973864327165
430.0	-0.9373338436393551	0.6075487680756506
430.0	-1.045429422139342	0.40895279586179845
430.0	-0.3611535914887721	-0.5392165239864152
431.0	0.8508862005739005	5.611499843084
431.0	-4.072003944427524	-2.5484945504290617
431.0	-2.6044725108663895	-3.928072653603005
431.0	5.825590254720015	0.8650673609480592
432.0	-1.4659756294934108	-0.8376331420016253
432.0	1.1248520365819659	-1.2093051205778464
432.0	0.34112359291143657	2.046938262579458
433.0	0.34425842408237023	0.12970828359466033
433.0	-0.1057255656321412	0.09781139833944795
433.0	-0.23853285845026384	-0.22751968193410108
434.0	-0.026104827382163808	0.5915734485282476
434.0	-0.3467630434910054	-0.25571472565245923
434.0	0.3728678708731834	-0.3358587228757873
435.0	-3.5174505849280946	3.2024599829658915
435.0	-0.6898874265308953	-2.970732875974412
435.0	2.57165089642538	-0.47373177288525975
435.0	1.6356871150336103	0.24200466589378006
436.0	-0.38205958411245916	0.05893258081957122
436.0	0.13344187337558722	-0.09807300041320535
436.0	0.24861771073688613	0.03914041959359149
437.0	0.030902494230184464	-0.05268814247154486
437.0	0.0028321269651919775	0.0771037712971709
437.0	-0.03373462119537636	-0.02441562882562427
438.0	-0.800033437179639	-1.4757933712490998
438.0	2.515923243193126	-0.563302715111394
438.0	-1.7158898060134815	2.0390960863604985
439.0	-4.247704302528009	5.0155919662928765
439.0	-3.6245245592412303	-4.030190262493568
439.0	8.129883631446974	-7.049122883784212
439.0	-0.25765476967773426	6.063721179984903
440.0	-0.11270153494238459	-0.05935126900769012
440.0	0.19291710224442762	-0.058580830849650885
440.0	-0.08021556730204223	0.11793209985734807
441.0	-0.05165886290411543	-0.009910128634892358
441.0	0.10262852128414951	-0.06100491348513316
441.0	0.0021562050898413588	0.04912631742991908
441.0	-0.053125863469889435	0.021788724690098925
