# Supplementary material
Source: ML conference proceedings conference paper supplement (https://openaccess.thecvf.com/content/CVPR2021/html/Harel_Crossing_Cuts_Polygonal_CVPR_2021_paper.html)
Supplement: Supplementary file 2 [file Harel_Crossing_Cuts_Polygonal_CVPR_2021_supplemental.zip › Dataset/D4/p8/pieces.csv]

piece	x	y
0.0	-7.079996184185117	8.620888801950619
0.0	-9.010487477043847	-5.375194258816315
0.0	-0.8029532229753853	-7.042429666887312
0.0	2.374830692081782	-7.451141006455044
0.0	2.7521150418126052	-7.298587837466211
0.0	3.9053241083973584	-2.533884283178844
0.0	4.784229885185067	10.232563044758056
0.0	3.076937156727563	10.847785206095118
1.0	-0.4750600289556833	-6.855872824896121
1.0	0.38305234169508495	-6.2471017582660275
1.0	4.747123913864349	8.20634422649023
1.0	4.64261098667386	10.198175176698275
1.0	-3.5795034165844926	6.324168765594986
1.0	-4.956155500163094	-4.684285277110429
1.0	-0.7620682965300475	-6.941428308510909
2.0	-0.5328906868336178	-4.79068954346492
2.0	2.290383702194396	5.253587980641248
2.0	0.6623045590994291	4.044873438839462
2.0	-2.4197975744601896	-4.507771876015791
3.0	1.8934148697713151	-7.035443912129127
3.0	2.737151645206118	-5.663698890874271
3.0	-0.16669345749580544	13.218058945968778
3.0	-2.468167376392872	10.717496698103147
3.0	-3.362066966729145	-4.107838213572232
3.0	1.3663612856403713	-7.1285746274963175
4.0	0.17701604031943843	-0.5148514113389534
4.0	0.5260963925075508	-0.05538638192409844
4.0	-0.38712484105423417	1.256067048600432
4.0	-0.31598759177273295	-0.685829255337384
5.0	-5.098798853761078	-5.186810931435397
5.0	-1.6687814059133728	-8.05297044155291
5.0	3.2945674023820626	-6.799807148051472
5.0	3.746002996859285	-5.743804445172378
5.0	1.2909645079587504	12.051309508613778
5.0	-1.5639546475256332	13.732083457598351
6.0	-3.0359450104841903	1.632858497641952
6.0	-1.9722990047535702	-0.8622162809286367
6.0	1.0251149356810723	-2.672322582381828
6.0	3.9831290795566927	1.9016803656685064
7.0	1.0905925122499187	0.3797002363758187
7.0	0.2535871131905481	0.9444731147175683
7.0	-1.3441796254404486	-1.324173351093376
8.0	1.06364253836618	-0.8892031850901803
8.0	0.14169965766581546	0.9527604570591433
8.0	-0.07813783400267174	1.0444839344945882
8.0	-1.7061040257354445	0.29635451541425767
8.0	0.5788996637061208	-1.4043957218778087
9.0	8.113169617819896	-2.589982051826946
9.0	0.8560481309346512	5.1151397679459665
9.0	-5.03964342339208	-0.8421296277987161
9.0	-3.929574325362475	-1.6830280883202926
10.0	-5.48085771892323	-2.6202221697547725
10.0	5.921539144990238	-0.5167912244609718
10.0	6.108633445766252	1.9433223904884889
10.0	-6.549314871833275	1.1936910037272421
11.0	0.9860701965865318	-3.3596147525708075
11.0	3.6170232495568655	0.15369424365175044
11.0	-0.06010386725368891	3.0240616754371366
11.0	-1.4467793249593066	1.9995871119850643
11.0	-3.0962102539304124	-1.8177282785031432
12.0	-0.01039164661840614	-3.380291607183174
12.0	4.185522330654251	-1.0099999351507996
12.0	6.667074513834027	4.1765875114884725
12.0	-10.842205197869886	0.2137040308454934
13.0	-8.640962347286449	-3.6672085058016086
13.0	3.7049431508254913	-2.7626809604183946
13.0	8.00271512895578	-1.7005975892319212
13.0	5.219214593894215	1.6426057187822107
13.0	-8.285910526389038	6.487881336669706
14.0	-1.6847368526683713	-1.3838473318357722
14.0	0.09964257074957104	-2.2736364824211903
14.0	2.6675068290364785	2.366087348755955
14.0	-1.0824125471176729	1.291396465501021
15.0	1.9298047002754846	-2.6698898093123726
15.0	0.03033500997750298	1.617794331695379
15.0	-0.7534425664179037	2.1204787116505535
15.0	-1.4340431380908087	1.7745822561986428
15.0	0.22734599425579452	-2.8429654902321877
16.0	0.8210244152527907	0.1322700208548214
16.0	-4.185832998611912	1.7084491918441946
16.0	-1.524224988370995	-0.07647455163226956
16.0	2.283977732093912	-0.9788927931435355
16.0	2.605055839636193	-0.7853518679232008
17.0	5.1335304714596015	3.7835826078658297
17.0	-4.344940088747059	0.26638600200087814
17.0	-0.7885903827125453	-4.049968609866707
18.0	-1.6120386849384272	5.683480039644771
18.0	-2.9906087396153986	4.154371776134797
18.0	-4.613937709438373	-5.533355463683113
18.0	-1.0258691791058696	-7.055929240847304
18.0	6.489010397719511	-1.210940033235556
18.0	3.7534439153785817	3.962372921986361
19.0	-2.0189790056233217	1.8315509196636157
19.0	-1.7045203956406176	-3.467327031715184
19.0	3.283641038008074	-2.9614565725080935
19.0	0.43985836325587696	4.597232684559675
20.0	-0.2003307914751556	1.0065722439770939
20.0	-1.8401387832841645	1.086259093840031
20.0	2.0404695747593085	-2.0928313378171333
21.0	-3.180359881785102	-5.865324586910962
21.0	1.3857937657076713	-4.102147153835394
21.0	1.9851437971688222	4.046814085585708
21.0	-0.19057768109143056	5.9206576551606656
22.0	4.175547949401001	-4.676364656049905
22.0	4.260759445165972	3.6112504035126096
22.0	-3.8056205479467518	6.090296783203511
22.0	-3.8590308300108225	5.681123167652003
22.0	-2.640436459796863	-4.227574778639851
22.0	1.868780443187444	-6.478730919678361
23.0	-11.495154510433439	-10.817606763566527
23.0	8.947047291313364	1.5227023358066256
23.0	9.019878704100442	3.603535371872
23.0	-6.471771484980379	5.691369055887914
24.0	1.112043026602494	-3.7707357852287187
24.0	3.36610857381876	2.118936139344988
24.0	-1.872229276622694	3.6299103507100594
24.0	-2.605922323798541	-1.978110704826338
25.0	0.4789893562969069	0.13440337423341794
25.0	-0.47703887361285413	0.34584093402763677
25.0	-0.001950482684051464	-0.48024430826107056
26.0	-0.6049007217800323	0.1436375568270053
26.0	-0.24471090990928265	-0.46434781385258045
26.0	0.3437711485021317	-0.02044552167775458
26.0	0.5058404831871863	0.34115577870333924
27.0	-2.623126122367343	-3.6970310092281884
27.0	4.9258168291000235	-0.055122171551260285
27.0	-2.302690706732685	3.752153180779454
28.0	1.371236385032174	-2.8565410898658037
28.0	1.328651404633165	1.2361742763698518
28.0	0.15846359462617568	1.739504000831581
28.0	-2.858351384291518	-0.11913718733562165
29.0	-0.5215212308163152	0.7331580988876382
29.0	-1.6068458843774118	-0.45390877236825905
29.0	1.1915232448830226	-0.3077500965638297
29.0	0.9368438703107027	0.02850077004446052
30.0	0.6503211487095792	-0.2021490914654896
30.0	-0.08272966505700143	0.9248962257534427
30.0	-0.5675914836525875	-0.7227471342879503
31.0	-4.715726805942123	2.4358946717051224
31.0	-2.4757621007555026	-4.9432771028572535
31.0	2.4907185472043856	-4.509374343644917
31.0	3.145525521823664	2.74517875232109
31.0	1.5552448376696182	4.271578022475962
32.0	-2.70412319570173	0.5767442281276054
32.0	0.49648913671212214	-6.667287344740973
32.0	1.4138665308214933	-1.5130010126935043
32.0	1.0988808065587838	3.8399257927541544
32.0	-0.305113278390683	3.7636183365527223
33.0	1.7319514780141767	-4.577034393828596
33.0	-0.09691907997257594	3.6057157304962413
33.0	-1.1235756006862778	3.4150974381021677
33.0	-1.3139717601133125	2.4768087379899364
33.0	0.8025149627579927	-4.920587512759744
34.0	-1.2471383381312213	-0.8883604781294069
34.0	-0.7448858322012678	-1.07937438847549
34.0	1.9920241703324608	1.9677348666048924
35.0	7.203434325108712	7.824987788626847
35.0	-4.439701163135252	12.428851779198654
35.0	-8.282887712997713	-5.365082751875578
35.0	-1.0270164504099906	-9.24237529424291
35.0	6.546171001434223	-5.646381521707043
36.0	-0.5792652900927465	-0.36771431776691893
36.0	0.3519427301440795	0.06256696950900707
36.0	0.22732255994865994	0.30514734825791173
37.0	0.23631393378539228	-0.980712712128559
37.0	0.3783487350265056	0.16516111390761
37.0	-0.6146626688118945	0.8155515982209501
38.0	-4.225027019710626	-2.978023375628217
38.0	-3.316522328043409	-3.2684034545368665
38.0	7.667341130124901	0.09265084201735302
38.0	6.766233419454018	4.27437444644206
38.0	-6.89202520182484	1.8794015417056438
39.0	-1.3880360533741738	-1.243099593049904
39.0	-0.6850709763413839	-1.4957857171403965
39.0	1.3811245006405446	0.6799408426376581
39.0	0.6919825290750281	2.058944467552658
40.0	-6.524536519220301	-2.2824522079590075
40.0	-3.3095969625471553	-3.972940173744316
40.0	9.781259799044573	1.4388033629224806
40.0	0.05287368272288948	4.816589018780847
41.0	0.5787874669005643	10.333700073325272
41.0	-3.184751819554775	-1.3056264768696113
41.0	-4.196004985518288	-12.70721059595552
41.0	-0.625435906105458	-11.142046493047955
41.0	2.9243846484315053	-2.0426547293212174
41.0	2.4933128120432566	7.322618444368828
41.0	2.009707783803245	9.541219777500304
42.0	7.288998585662329	-0.5898074191055362
42.0	-5.193562015743838	4.369657282241311
42.0	-8.604468364773442	-1.6367804485845578
42.0	6.509031794854954	-2.1430694145512077
43.0	2.275052997559438	-0.09808326898912051
43.0	1.2295955535971959	2.2301117195838485
43.0	-2.5960963930275183	0.3237940414536176
43.0	-0.9085521581291343	-2.4558224920483807
44.0	1.5457176526554477	2.185963524965403
44.0	0.9009801245995288	2.857529692262119
44.0	-2.3900484793910497	-0.7723944819518492
44.0	-0.056649297863930595	-4.2710987352756575
45.0	-7.342750573010535	0.694278994651909
45.0	-5.354573540581032	-2.4236835211931367
45.0	5.254511990960651	-1.6825059537288003
45.0	7.105437236813214	0.3950015574692995
45.0	6.588732474456984	0.8229907756186532
45.0	-6.251357588639351	2.193918147182024
46.0	-0.478449364155634	-2.866573160514259
46.0	2.3153986165735274	0.2609775410351029
46.0	-0.29629828320434537	5.1378397451427515
46.0	-1.5406509692135586	-2.532244125663577
47.0	-0.3836402745060226	0.5359486535069637
47.0	0.0406876729613499	-0.5218907769687579
47.0	0.34295260154468854	-0.014057876538207103
48.0	2.1729767410402223	-1.6088577280371987
48.0	-1.465075929252304	2.7457342547548165
48.0	-2.664420055853722	0.9580545229842471
48.0	1.9565192440658263	-2.0949310497018816
49.0	0.9685300111234879	-0.682840956353681
49.0	-1.531705744781095	1.3021481216084407
49.0	0.5631757336576266	-0.6193071652547388
50.0	-2.6794014408168545	-1.1997462991688574
50.0	3.0182291234695504	0.6752016962223246
50.0	3.0064308306005723	0.7115342752010727
50.0	-3.345258513253268	-0.18698967225453986
51.0	-2.6630737939112294	2.016016386013028
51.0	-1.0717359225778007	-1.6078355313450812
51.0	0.19083131051039845	-2.959755675906557
51.0	3.5439784059786446	2.551574821238617
52.0	-1.1978835066044058	1.3236667697171205
52.0	-1.4967067540256662	-0.040827024005827495
52.0	2.6945902606300685	-1.2828397457112912
53.0	-3.9701242090945783	-2.3373136534060923
53.0	5.724257786027931	2.204954222220278
53.0	6.032035608617032	2.850553722132054
53.0	-3.5716816078919504	-0.8300728543229495
53.0	-4.21448757765842	-1.8881214366232866
54.0	1.2369086441656998	-3.9263756789190563
54.0	2.37853473133661	2.4406407309802436
54.0	-0.7353873615500567	2.5986833527881585
54.0	-1.7784428907574932	0.9454506616093992
54.0	-1.1016131231947541	-2.0583990664587524
55.0	1.4206347501567997	3.3402524157911957
55.0	-3.5589770248102197	-1.536224208460506
55.0	-1.5909272604849571	-3.8344039883582277
55.0	3.7292695351383767	2.0303757810275203
56.0	-1.7514998393266796	0.32188030226817316
56.0	-0.4138884736716999	-0.709155441075395
56.0	1.1508174428575657	-0.2513557101281431
56.0	1.0145708701408138	0.6386308489353614
57.0	3.521200757609759	-7.816301802045703
57.0	2.2865328474516766	6.2919332651890825
57.0	0.5392231514191108	8.56283538748415
57.0	0.2372641565805326	8.61586748856299
57.0	-1.9800025895144056	3.5754025783553627
57.0	-3.4705884769770607	-4.64334394488832
57.0	-3.1511967818633977	-6.398876868075813
57.0	2.0175669352937824	-8.18751610458174
58.0	3.4105349204801243	-9.565767319918505
58.0	4.378419768304117	7.776842337905539
58.0	-1.7688271959250776	6.974966020298557
58.0	-8.018210109451564	5.007037371037456
58.0	1.9980826165923942	-10.19307840932302
59.0	-4.914788114917116	2.8730559970741085
59.0	-4.644563154875461	2.4019080526284022
59.0	0.5074088349493315	-2.4565290607490207
59.0	9.05194243484324	-2.8184349889534945
60.0	-1.8970789344555932	-3.529558528097538
60.0	0.7897156786409467	-4.798074708203486
60.0	1.107363255814648	8.32763323630104
61.0	1.1863125408414454	-4.337928220724036
61.0	1.3764814061218376	-0.17074039936344515
61.0	-0.543739758473223	2.8620122428653363
61.0	-2.0190541884900637	1.646656377222146
62.0	-0.41771385179449094	-0.15822472987101066
62.0	-0.2816097212701835	-0.3678132493218042
62.0	0.4574368002940501	0.14765348599833097
62.0	0.241886772770621	0.37838449319449813
63.0	0.016025068966756886	-3.8335456109697144
63.0	7.4094370483148175	-0.9901608613704385
63.0	-2.9564449864186533	7.626878262810581
63.0	-4.469017130862936	-2.803171790470425
64.0	-0.7016545009384532	0.4645762663041307
64.0	0.6516286900627021	-1.4563862955776652
64.0	0.05002581087573771	0.9918100292735296
65.0	-4.749701674318693	-3.6632885941308593
65.0	-0.7918430133139169	-4.954614541489519
65.0	3.737261537321243	2.0809764693875876
65.0	1.5966600764190653	3.5979838160628552
65.0	0.20762307389228207	2.9389428501698758
66.0	1.244022514430841	0.143849587765792
66.0	-1.0454945336935002	1.3766981560173526
66.0	-0.19852798073732877	-1.520547743783155
67.0	0.2937033941095814	0.5649966370623247
67.0	-0.9813453881422441	-0.29913259149214566
67.0	0.6876419940326766	-0.26586404557018245
68.0	-1.2717276377191693	0.5592875929309311
68.0	-1.5879650186091339	0.2311122319744261
68.0	2.0588278220796314	-1.5949222213527308
68.0	0.8008648342486732	0.8045223964473633
69.0	-0.4141247152363621	0.22385143971710653
69.0	0.0742449918395101	-0.47197576309534434
69.0	0.5795231632815384	-0.07171260658873532
69.0	-0.2396434398846645	0.31983692996699414
70.0	-3.0284363857812777	-0.35931804300276216
70.0	-1.1474083890758724	-2.6686103904614775
70.0	5.301634727056867	-2.3428790739488843
70.0	5.613444485272207	-0.9581394371528033
70.0	-6.739234437471898	6.328946944565915
71.0	-0.9852069985313916	0.20905155248860563
71.0	-0.025229187556200478	-1.342762747567385
71.0	1.0104361860876057	1.1337111950787753
72.0	-1.1412784049025162	-8.031811991091374
72.0	3.2814132246282295	6.957067869440717
72.0	2.9358236284324613	7.247413409611085
72.0	-5.075958448158142	-6.1726692879603995
73.0	-4.893404093223037	2.9086536559351157
73.0	2.8502050477531267	-2.3678975601607153
73.0	2.1655310832535988	-1.2638546261626797
73.0	-0.12233203778369131	0.7230985303882936
74.0	2.991977133641505	-2.298895488596544
74.0	0.2691510440465168	4.234538482963063
74.0	-3.2611281776880356	-1.935642994366545
75.0	-0.7385400829671831	-0.7769200381546528
75.0	-0.6745650892628344	-1.0311782899665318
75.0	1.990244938092949	-0.5834830652765357
75.0	-0.5771397658629299	2.391581393397749
76.0	2.6113595267580854	-2.7359976976938816
76.0	3.498002242939118	-2.8046834199314508
76.0	3.975985022866286	-0.05415605533562008
76.0	-5.039900011708509	3.555235731965633
76.0	-5.045446780854981	2.0396014409953267
77.0	-0.36320967659623765	-2.065219454101153
77.0	1.1928426077385363	0.4757188867850324
77.0	1.7603898050591928	3.251113503080018
77.0	-2.590022736201506	-1.6616129357639047
78.0	-1.8361543019546434	-1.8909221819684374
78.0	2.212493744029958	-0.9320816647088276
78.0	2.5748126128830093	3.2632705695688276
78.0	-2.9511520549583232	-0.44026672289154134
79.0	0.358000963418545	-2.267804527977057
79.0	4.180517202552417	2.5801558421807123
79.0	-4.538518165970963	-0.31235131420365236
80.0	-2.842284497313638	-1.8288557708353377
80.0	2.896295645253897	-0.04593569242689215
80.0	3.0101070031742574	1.5023814586936772
80.0	-3.0641181511145157	0.37241000456855633
81.0	1.0802562216045213	0.8375707971176087
81.0	-2.884587958398847	-1.119339276330023
81.0	1.8043317367943263	0.2817684792124108
82.0	0.6953776612805729	0.6451955880394254
82.0	-0.5164879369128198	-0.24706834611738282
82.0	-0.17888972436775094	-0.3981272419220503
83.0	0.22807430509619472	-0.054034609670729844
83.0	-0.05751036084625498	0.1057053008338177
83.0	-0.1705639442499612	-0.05167069116310681
84.0	7.917942884335888	1.4846377313068277
84.0	3.5222044271983175	4.700450328607969
84.0	-7.5934713327907986	0.15063877328532743
84.0	-3.8466759787433946	-6.335726833200119
85.0	-1.8430320645251992	8.029052966792111
85.0	-7.16181479415773	6.840583668281228
85.0	-4.302117906211972	-4.324051973392506
85.0	-2.103891122960023	-6.717133623628381
85.0	7.175061198224464	-2.699708577592412
85.0	8.235794689630469	-1.128742460460068
86.0	1.7545282135998004	0.14415561236582217
86.0	0.03856858450954707	1.2799339215716972
86.0	-3.598019728503608	-1.4013354579908905
86.0	1.804922930394259	-0.02275407594661263
87.0	-2.9908300602882965	0.27283141169969904
87.0	-3.742654078385917	-0.6614479635640824
87.0	-1.872233860950447	-2.099063196765341
87.0	8.605717999624646	2.487679748629721
88.0	2.5300114698386524	1.3672962843498135
88.0	-2.3273945028993395	0.2319269100994497
88.0	-3.486449285939656	-0.9233543271685327
88.0	0.274064298115375	-1.518801053734086
88.0	3.0097680208850046	0.8429321864533118
89.0	3.1892206352006958	1.677909661284706
89.0	1.8692042972597152	3.1187846044452874
89.0	0.3740649480999566	3.506193861265698
89.0	-3.8516603172798205	-2.8731308067948294
89.0	-2.7189372398467437	-3.578010649382348
89.0	1.1381076765662133	-1.8517466708185004
90.0	-1.498424969959558	-2.2759752185860744
90.0	1.1191011899642043	0.7346920460830989
90.0	1.4781494167290123	1.5320070549172116
90.0	-1.0988256367336748	0.009276117585740509
91.0	-1.8976102810280744	0.10817639607161587
91.0	-0.5243715747311817	-2.61807992015648
91.0	2.0291153266929687	0.4626836198765028
91.0	0.3928665290662688	2.047219904208321
92.0	-0.8916322647637411	-2.1415947002942244
92.0	2.5704306108994786	0.38286042616386495
92.0	-1.6787983461357288	1.7587342741303482
93.0	1.0685031460230832	0.9823854467812693
93.0	0.1914350643034007	1.7239387439174176
93.0	-1.351014099324342	-0.9717731443166879
93.0	0.09107588899783628	-1.7345510463819809
94.0	1.9895545290277492	0.6818701448707735
94.0	0.0638341381973329	2.658910912227305
94.0	-1.0173959535881256	-0.16477034344374006
94.0	-1.0359927136369629	-3.176010713654352
95.0	-3.8324812114495863	2.362142204286054
95.0	-5.662161558183942	-3.790119079100311
95.0	4.6612316475665585	-4.266327805687382
95.0	3.650233599701222	2.567630724686162
95.0	1.1831775223657568	3.1266739558154333
96.0	-3.6809320686361326	1.0363801250730096
96.0	1.67611843670436	-7.580054627643391
96.0	2.9075913242361717	1.3215988421760927
96.0	2.1615893485101263	2.978009759083764
96.0	-3.064367040814498	2.244065901310517
97.0	-1.4395740081542439	-2.2955584822873476
97.0	1.0587532617268947	-2.816567875490482
97.0	0.9983563098482465	2.4494720294406225
97.0	-0.6175355634208611	2.6626543283372244
98.0	-2.0545043697786407	-2.9755181059247438
98.0	0.5845358464795243	-1.8723473908527595
98.0	1.3699552335555882	-0.21965500244818695
98.0	0.5863089239628846	2.351776586739364
98.0	-0.4862956342193665	2.715743912486314
99.0	-6.115060783122687	-1.8127902413997818
99.0	0.3877722806151976	-3.2137633678118047
99.0	5.752214553644329	0.6153317189388356
99.0	-0.024926051136876185	4.411221890272727
100.0	-0.8237281211215058	-1.5300855836034075
100.0	3.3442015862854335	-1.3149895188598828
100.0	-2.5204734651639424	2.845075102463295
101.0	0.14998450490239598	-0.3617168577558286
101.0	0.03420750428234927	0.41710779582418855
101.0	-0.18419200918473533	-0.055390938068358306
102.0	-1.9053953455405697	0.1797032261764207
102.0	0.48939679332598096	-2.024777868339612
102.0	1.415998552214602	1.8450746421632063
103.0	-0.23707955178958304	-7.236285284793139
103.0	5.231460959941911	-0.004142909802211909
103.0	3.3515132407664736	3.505345023424939
103.0	-8.345894648918836	3.7350831711704373
104.0	-4.092956446111818	2.572200599146636
104.0	-5.155843124153582	-3.052187688496479
104.0	3.0504717416085545	-0.6958801271833458
104.0	3.0376148684205413	-0.4922598462443669
104.0	2.9294640093780875	-0.29085466321581066
104.0	0.2312489508582346	1.958981725993375
105.0	-0.8569221156839654	5.143021758657622
105.0	-2.5867409794484035	4.5873097450175315
105.0	-3.690975044157014	-5.186745912089377
105.0	7.134638139289375	-4.543585591585776
106.0	0.657176709205664	-6.137177336972203
106.0	3.4852251474592815	0.47942027363490164
106.0	1.9132454366730218	6.299541567019589
106.0	-1.345738365460723	6.208764434029593
106.0	-4.690763824233293	-0.2712151615586693
106.0	-0.019145103643933344	-6.579333776153219
107.0	0.7695995619192909	-0.1937677528690748
107.0	-0.6660174741029942	0.7414965078857334
107.0	-0.10358208781630827	-0.5477287550166402
108.0	-1.3785587011017602	-0.32388185514846646
108.0	0.7904140333123623	-0.2402710154476326
108.0	0.5881446677894038	0.5641528705960936
109.0	2.179434836654831	0.6532740976947405
109.0	1.4114316435163465	2.5989363146240128
109.0	-2.2219570890390026	0.412672713487983
109.0	-1.3689093911321804	-3.6648831258067514
110.0	-0.23063894191867734	-1.522968045728201
110.0	0.1394694525057316	-1.434043180643571
110.0	1.961712312060228	3.4165681295181054
110.0	-1.870542822647286	-0.45955690314630165
111.0	0.5199474076874854	-5.282073424050898
111.0	3.8695773890255927	0.00039526160264268396
111.0	3.85111177017512	0.07841768276857079
111.0	0.5778397552786888	5.347896672852422
111.0	-5.436233560382967	5.058950209125438
111.0	-3.3822427617839	-5.203586402298185
112.0	5.493611316856702	2.392268729725534
112.0	4.739699278047808	3.7036264459208357
112.0	-6.630235161887408	-1.8427843813566305
112.0	-3.603075433017088	-4.253110794289764
113.0	-0.4979033637290393	-0.7675839236584048
113.0	1.629229698956947	-0.2864704822960268
113.0	-1.1313263352279035	1.054054405954426
114.0	-1.2747149362083823	-2.629429024103023
114.0	3.9534604127908093	-0.17944251472021824
114.0	4.663119558300004	2.438397173646944
114.0	-3.3622879495401574	2.3385614648944126
114.0	-3.9795770853422474	-1.968087099718165
115.0	0.31335551570769543	-1.3431005275377044
115.0	0.11578247878134613	0.8787334132153352
115.0	-0.42913799448902684	0.46436711432237526
116.0	-1.1885226991305695	1.2930602542041125
116.0	-1.765859520151564	-0.6104908109684685
116.0	0.6022184634556326	-0.7388839120256261
116.0	2.352163755826525	0.05631446878996587
117.0	0.10716739646744655	0.533686958269239
117.0	-2.3943395181531835	-0.7816100477042189
117.0	1.4174361196029883	-0.2566721947224838
117.0	0.8697360020827262	0.5045952841574765
118.0	1.2074530924266267	-2.1353817305052663
118.0	0.7690939845068414	0.3984717864083555
118.0	-0.7326585178697204	2.6404880731888736
118.0	-2.0779854054998936	1.4615699865994287
118.0	0.8340968464361669	-2.3651481156913854
119.0	4.511586942708291	-0.14418301814219786
119.0	-3.5624543684737793	4.928989911787979
119.0	-3.9562351557099964	4.812637192186925
119.0	-2.6753663714074607	0.5254285895465
119.0	-0.0548993836438715	-3.755680217868711
119.0	0.9973502550455852	-4.180496621640933
119.0	4.740018081481313	-2.186695835869537
120.0	0.2163638636053307	0.5814363846319409
120.0	-1.3851663582131792	0.9107634120019277
120.0	1.1688024946078412	-1.4921997966338498
121.0	-0.07204763343087899	-1.5128872361449723
121.0	1.067755438300783	0.37180545386641717
121.0	0.8294274705983561	1.5668035840114196
121.0	-1.3476519972367158	0.9037323410642295
121.0	-0.4774832782315709	-1.3294541427970576
122.0	-2.0934279070054984	-3.2181310636353215
122.0	-0.25460853828818414	-3.0936848343887324
122.0	1.3546789119297693	2.9282288762182045
122.0	0.9933575333639035	3.383587021805845
123.0	0.24914281612449676	0.20158155685354348
123.0	0.19266676026978935	0.21157430398762514
123.0	-0.3942065598022574	-0.19325890718210448
123.0	-0.0476030165920234	-0.21989695365909548
124.0	1.7104192808023089	0.543846057858036
124.0	-2.98103060635343	2.913519214362837
124.0	-1.4501321672534802	-2.2940928005646275
124.0	2.7207434928046053	-1.1632724716562675
125.0	-1.0302000645691491	0.5803347153548821
125.0	-1.9624190273211934	-0.620454184932128
125.0	2.992619091890319	0.040119469577247824
126.0	2.3321857351409223	-4.840999260671099
126.0	4.292996477484382	-4.60621373375007
126.0	8.028935991896452	3.2603261077964807
126.0	-6.942365289617085	7.088716327023089
126.0	-7.7117529149046655	-0.9018294403984205
127.0	2.9494573148744756	3.4249030752777117
127.0	1.0737200983048487	4.971566242368352
127.0	-1.642586963813365	1.63436775233105
127.0	-2.621156856956985	-5.090827101011352
127.0	0.24056640759100772	-4.940009968965763
128.0	6.612236606068266	2.1922842054044938
128.0	-5.936600245863101	1.3706407404814165
128.0	-6.469165874332487	1.1208959330558044
128.0	-6.389447313663671	0.032467941516502404
128.0	5.403118862712274	-4.552365358911762
128.0	6.779857965078708	-0.1639234615464534
129.0	-1.822249547731856	0.7708035164128577
129.0	2.0339827604716203	-2.003473747232079
129.0	1.6710772536647411	0.3202847340831092
129.0	-1.882810466404491	0.9123854967361124
130.0	-1.8809106434632268	-0.5295011553192192
130.0	1.4130774541970654	-1.7985665901087604
130.0	2.0106856832342035	1.9523888817352215
130.0	-1.542852493968044	0.3756788636927511
131.0	-2.073684799491368	1.8502613985174983
131.0	2.363780508722746	-4.348817254956784
131.0	-0.2900957092313752	2.4985558564392725
132.0	-1.649507719902833	0.0008239528604802755
132.0	1.1338097364551059	-1.0729620218072613
132.0	1.6159107263352679	-0.6742367338321698
132.0	-1.1002127428875148	1.7463748027789627
133.0	5.200524950129051	0.9226005806695599
133.0	-8.163593812617737	2.4598913976743475
133.0	2.963068862488689	-3.38249197834391
134.0	0.5049487440320332	0.32012585861469245
134.0	-1.3192205361335205	0.024593043561074432
134.0	0.8142717921014839	-0.3447189021757675
135.0	-4.607425580642866	-1.3076125243643562
135.0	-0.7319791528693849	-8.217571071623706
135.0	3.827729678833772	3.762165338903052
135.0	1.5116750546784696	5.763018257084998
136.0	2.5722593101416864	-2.8020747228414242
136.0	-1.8257659202536993	3.266931405484974
136.0	-2.8544156873228967	2.717600189628301
136.0	2.1079222974349467	-3.1824568722718305
137.0	-1.0154688050993421	0.9529237008075898
137.0	0.4991157983557842	-1.4685620943162223
137.0	0.5163530067435633	0.5156383935086278
138.0	-1.2966027164293212	0.38299726333528744
138.0	-1.0782282937731258	-0.32335162462436084
138.0	2.3748310102024544	-0.05964563871092747
139.0	0.9406737170192215	-0.3838861623910105
139.0	3.114544401681152	2.323653723134489
139.0	-4.055218118700375	-1.9397675607434641
140.0	0.4697088342072905	1.05841257962092
140.0	-4.337111741965382	-0.7943305893998766
140.0	1.7402508106781938	-1.1147140845528383
140.0	2.1271520970799087	0.850632094331836
141.0	-2.8148727008843504	1.8440010874441959
141.0	-3.2419870582174983	1.7072571583910243
141.0	-3.4362913779218722	0.04393348989537115
141.0	-1.31283279585164	-4.241797032023626
141.0	4.825702069762001	-1.679662231403664
141.0	5.980281863113378	2.3262675276967295
142.0	-2.9851817127453026	2.5135172217065436
142.0	-1.813801177992017	-0.7369153205725788
142.0	3.6399920960105447	-2.562203295039961
142.0	1.158990794726784	0.7856013939059692
143.0	1.015982551555727	-0.0485853771034079
143.0	0.17501846496112208	0.7137821459557608
143.0	-1.1664238209761704	0.5433521997726566
143.0	-1.206735389193693	-0.28607715065331063
143.0	1.1821581936530112	-0.9224718179717062
144.0	-2.5780126492059776	2.0656137290751064
144.0	0.3248679217758683	-2.725977107945272
144.0	2.2531447274301093	0.6603633788701656
145.0	0.8579473903186983	-7.693392491462308
145.0	3.835726276574667	5.43761994441518
145.0	-0.9993530597393254	8.663740665709458
145.0	-1.708123940339967	7.852102407916398
145.0	-2.5351791816044824	-6.109228047114988
145.0	0.5489825147904488	-8.150842479463764
146.0	-3.842076176457761	-7.497272695890575
146.0	0.825629335601916	-7.9911474433285
146.0	9.504493268571569	-6.258272800301444
146.0	3.2024385851140384	7.944221219508702
146.0	-9.690485012829766	13.802471720011816
147.0	-1.4349602454139947	-2.3314105824541
147.0	3.5059760364338683	-2.303324388210834
147.0	1.2789663799033393	1.8663796097187744
147.0	-3.3499821709231714	2.7683553609461518
148.0	-3.3634235438859363	-0.18692349860365812
148.0	0.6826770323844943	-4.6504303059784915
148.0	2.4733472691176095	0.6463909809580912
148.0	0.20739924238383262	4.190962823624051
149.0	0.1028456803595044	2.4615742771356133
149.0	-1.0498172084654325	1.4764876454645117
149.0	0.17840384396034942	-2.106190646830259
149.0	0.768567684145575	-1.8318712757698672
150.0	0.6021637933161335	4.358951701781679
150.0	-0.3163397768144177	4.084276067858628
150.0	-3.159738942558715	-1.891713554304291
150.0	-3.435449511105949	-3.832481999841759
150.0	6.309364437162933	-2.7190322154942552
151.0	0.767393542274176	3.8721626026975096
151.0	0.4029223216899675	3.787768398366964
151.0	-1.2488100101848971	-1.5673219237344211
151.0	-0.29781233171923577	-3.005863115061368
151.0	0.37630647793998445	-3.086745962268691
152.0	-1.2286421558081315	8.350050576662685
152.0	-1.3857131716443676	8.148009207795784
152.0	-10.621461080641614	-9.909168811641393
152.0	4.976377053985753	-10.845147733205994
152.0	8.259439354108357	4.256256760388912
153.0	1.405309868016121	0.338667343277536
153.0	-0.6863352176831302	0.9093403704361162
153.0	-0.7952876349117232	-0.6216086803064499
153.0	0.0763129845787437	-0.6263990334071612
154.0	0.4288039852267016	2.2879714199730095
154.0	-1.4045886753627554	0.20168723630373506
154.0	0.9757846901360595	-2.4896586562767165
155.0	1.93691685789329	-2.2328174953466617
155.0	1.3123121039690242	2.3533634239048866
155.0	-3.2492289618623142	-0.12054592855822462
156.0	0.044428615209083054	-1.899294166248448
156.0	0.7371789308770935	-0.4855347423932622
156.0	1.0655835689435489	2.9671262522058264
156.0	-1.8471911150297218	-0.5822973435641038
157.0	0.876251286384358	0.8627127046941822
157.0	-0.049239031875737645	1.2557828963320592
157.0	-1.400739645778538	-0.42386088997266125
157.0	0.573727391269959	-1.6946347110536193
158.0	-5.9720372033716025	1.1530395410065084
158.0	-2.145862584331186	-2.4010881865004916
158.0	4.377540798430129	-0.10068687739747838
158.0	4.198509723270905	0.24078026606949454
158.0	-0.4581507339982872	1.10795525682197
159.0	0.501385321619422	0.4874063246918721
159.0	-0.809914908695749	1.2110039556672043
159.0	-0.987319714471853	1.2169192170628083
159.0	0.6046518892575146	-1.4732519867110456
159.0	0.6911974122906547	-1.4420775107108532
160.0	2.3364230190750193	-1.2056672283237295
160.0	-0.3150839014056146	3.6078236019557233
160.0	-2.021339117669405	-2.4021563736319917
161.0	-2.5249777049724162	-2.8535254076648413
161.0	-1.2615605547197342	-3.265766430402597
161.0	3.108647317597113	-0.4665448898979559
161.0	2.3384067325336613	3.1735300496703944
161.0	0.566598634382112	4.121858846068101
161.0	-2.227114424820722	-0.7095521677731041
162.0	0.5835666861641668	2.441710737381202
162.0	-1.4505118847992458	-0.7355554779128017
162.0	0.8669451986350825	-1.7061552594683942
163.0	-0.0449438778162341	-0.41878163856504086
163.0	0.36934211670664	0.4068935187876063
163.0	-0.32439823889040836	0.011888119777418863
164.0	1.8342924469777786	-3.705320301717468
164.0	3.190366014208906	-1.1134274555740027
164.0	-1.9284611020363402	3.7810731630670698
164.0	-2.5691936351748814	3.4196460076279345
164.0	-0.5270037239754576	-2.3819714134035297
165.0	2.128654224447203	-2.219293785643901
165.0	0.877635661845166	1.676767581817889
165.0	-1.6324208394924293	2.3880603924753987
165.0	-1.3738690467999324	-1.845534188649388
166.0	4.998089101307598	1.5180245599115034
166.0	2.3508289937499462	1.8996671411395674
166.0	-7.920248069254068	1.5490297091733414
166.0	0.571329974196524	-4.966721410224412
167.0	2.8185261506593893	-1.7815887022310108
167.0	1.921618739745622	1.040914850677206
167.0	-2.3997719139093237	0.8761060542409845
167.0	-2.3403729764957006	-0.1354322026871743
168.0	0.901338789532959	-0.28299211383879735
168.0	0.3145861709236143	1.3295763070565572
168.0	-1.7783275262614378	1.1304744538058553
168.0	0.5624025658048674	-2.1770586470236224
169.0	1.7619745949844818	1.1091695539769124
169.0	-1.6849722148736261	0.5110534348492209
169.0	-1.00249422978162	-0.4288145479156554
169.0	0.9254918496707563	-1.1914084409104775
170.0	-1.5871632755500593	-0.2867695167896739
170.0	1.1082583984280376	-2.680300374191247
170.0	1.3181597575208277	-2.1951594360133067
170.0	0.28981255975251535	2.3544281500278306
170.0	-1.1290674401513112	2.8078011769663846
171.0	6.844682722969899	0.8035833722148726
171.0	-1.7906878817154597	3.9677455309089225
171.0	-3.4629680049119465	3.5712229973068785
171.0	-4.263498160340533	1.5535885767438375
171.0	-4.460058433310422	-3.209659897849567
171.0	0.02713575885704252	-7.03756383997405
171.0	7.105393998451426	0.3510832606490694
172.0	5.057336649096031	-0.04397321850823187
172.0	-1.25301877484202	3.57996944678112
172.0	-3.804317874254016	-3.5359962282729014
173.0	0.6291892195665495	0.02738294287378278
173.0	-0.19181812745405244	0.29873034657238295
173.0	-0.4373710921124956	-0.3261132894461667
174.0	-1.429064378712749	-1.2813660164214904
174.0	1.4765007954583902	-2.20686139780042
174.0	0.40554348141241214	1.715852966119009
174.0	-0.45297989815804	1.7723744481028954
175.0	3.8259771104093088	6.799349056323917
175.0	-4.457871709132965	-0.07754014726383757
175.0	-3.6632176361348905	-3.8489483365541917
175.0	-2.1959700270912466	-6.215642063524765
175.0	2.359878118588564	-3.2565925412280925
175.0	4.131204143361254	6.599374032246944
176.0	2.974080201449612	0.2795278777173079
176.0	-1.3533185462017636	0.6804160370014921
176.0	-1.6872300115926313	0.12605729845375557
176.0	0.06646835634481939	-1.0860012131725112
177.0	0.5355183323900138	-0.6662407293252451
177.0	-0.13536395539111726	1.0170302924730599
177.0	-0.40015437699889655	-0.3507895631478108
178.0	0.6543515085492733	8.797436208583582
178.0	-4.131290079912363	-1.210074949475942
178.0	1.3074600375395966	-4.4002680699045555
178.0	2.169478533823495	-3.1870931892030905
179.0	1.6984052510330767	1.598375936726868
179.0	-3.671320834752613	-2.0808910004631493
179.0	1.9729155837195362	0.4825150637362814
180.0	-3.5686659532233045	-0.8152494495428001
180.0	-2.5398699206015	-1.7793020249699871
180.0	3.545797963458282	-2.8157134447586705
180.0	2.5627379103665238	5.4102649192714605
181.0	11.029536990218032	2.0732479724214916
181.0	-9.395184163910365	4.228844971123761
181.0	-12.820968174285804	-1.1271377290682234
181.0	0.36059117301257154	-6.610208432993906
181.0	10.82602417496556	1.4352532185168974
182.0	2.973594118495908	-8.511928564688539
182.0	2.19805065900757	1.7458325459320172
182.0	2.091183996138513	1.8421245593419933
182.0	-0.8960108900801689	3.035803888400806
182.0	-6.366817883561824	1.8881675710137082
183.0	-3.873869244184557	-0.1828436706154915
183.0	2.655475863395438	-6.9166029349009275
183.0	2.9645433055361257	-6.465233108706124
183.0	1.1062045191989314	4.7202012113770735
183.0	0.2957319228657015	5.793001406809207
183.0	-3.14808636681162	3.051477096036199
184.0	0.18330106633510926	-0.7696000715154275
184.0	0.32973455760726406	-0.7655502319859813
184.0	0.26866367009705827	1.2391406859926009
184.0	-0.7816992940394225	0.2960096175088259
185.0	2.5919008509536203	3.5400838695050973
185.0	0.3467957904501795	4.673049850170331
185.0	-5.522469170645103	-3.214561849337612
185.0	2.5837725292413003	-4.998571870337797
186.0	-1.1365091488838213	0.06879583943674776
186.0	0.5589160585838681	-1.1901863946091362
186.0	0.3464885531386417	0.47066627530834015
186.0	0.23110453716128443	0.6507242798640398
187.0	-0.025767200054099482	-0.1301933839408406
187.0	0.3737730340138492	-0.22554509370230807
187.0	-0.0792417242219368	0.26013184735285977
187.0	-0.26876410973782455	0.09560663029028074
188.0	1.9489403834875818	0.7109408387689854
188.0	-1.3469215482621366	1.9228736520488474
188.0	-2.9551488886434636	0.5753963746538053
188.0	2.3531300534180186	-3.209210865471638
189.0	0.10694530966686483	0.6026812004851912
189.0	-0.5672600591566757	0.31701664025659204
189.0	0.460314749489817	-0.9196978407417798
190.0	-1.6031570913588589	-0.3212145889290315
190.0	3.67330498622341	-1.4697769430729284
190.0	-2.070147894864542	1.7909915320019707
191.0	1.1787436404767506	1.613976907325117
191.0	1.299751102010081	4.904850829288453
191.0	-2.9883523186553616	-3.8576423596736245
191.0	0.5098575761685352	-2.6611853769399314
192.0	0.0404592838355631	-0.49392467293845693
192.0	0.15077042322089232	0.27359229825859444
192.0	0.10809409003955026	0.5069073437363728
192.0	-0.31745130902526014	0.18778182240751043
192.0	0.018127511929257187	-0.4743567914640051
193.0	-0.324578503973946	-1.037522029977821
193.0	0.7191118402227166	0.6114417072879885
193.0	-0.040119065107759436	1.3464695165879597
193.0	-0.3544142711410113	-0.9203891938981273
194.0	-3.2233297547959943	7.489462174349525
194.0	-3.02644106893391	-3.6097095062634788
194.0	-2.012969090068165	-5.119701477891358
194.0	2.537801559102565	-5.646639977668715
194.0	5.724938354695509	6.886588787474042
195.0	-1.9705697544925307	-5.256118467837294
195.0	2.8203092733202784	-6.350844354638988
195.0	1.427114194087832	7.0623700696136655
195.0	-2.276853712915577	4.5445927528626315
196.0	5.27470113712858	-1.3823009487398799
196.0	5.077691310805772	-0.5479009756963192
196.0	-3.8592195751070597	9.708241452458457
196.0	-7.115624756507145	-3.511773483359989
196.0	0.6224518836798334	-4.26626604466228
197.0	-2.6153673231152164	6.40673916104028
197.0	-1.815484258463484	-7.436946665283028
197.0	3.1906051060264407	-6.947226467428024
197.0	1.2402464755522888	7.977433971670784
198.0	-1.0126120474872495	-2.8028897269025492
198.0	0.9739709855730806	-5.478943425687392
198.0	2.40218953884604	5.045082626839723
198.0	-2.3635484769318515	3.236750525750197
199.0	1.5609205214962996	0.5645457740682697
199.0	0.768549399599386	1.7322515808918764
199.0	-0.3335440312830119	1.4548302720100381
199.0	-1.3088442039359547	-1.1822226223078458
199.0	-0.6870816858767201	-2.5694050046623222
200.0	-0.30293733491996006	-0.046653068377034534
200.0	0.5709514257930034	-0.031181012070176095
200.0	0.04908843164409892	0.11361324127233989
200.0	-0.317102522517127	-0.03577916082512458
201.0	0.5871767889616782	1.3281471887777134
201.0	0.01461302154284389	1.3204037415540695
201.0	-0.6398930187275643	0.8763378811583655
201.0	-1.2223454272877605	-1.0971914941110261
201.0	0.17007762602488913	-2.06258378341389
201.0	1.0903710094859491	-0.3651135339652354
202.0	0.43847742367339987	0.20201263007989875
202.0	-0.27382117351248186	0.023279302469953207
202.0	-0.1646562501609036	-0.22529193254985455
203.0	-0.4445429542240066	4.884465518452041
203.0	-3.695050437228153	-2.9026563290769936
203.0	1.5507457950570729	-3.4693683340411914
203.0	2.0046042430710176	-3.161022686028183
203.0	0.5842433533240761	4.648581830694349
204.0	0.3942624482765792	-0.24714794430869372
204.0	0.11832788989312672	0.22665028032895015
204.0	-0.5125903381697068	0.02049766397975776
205.0	4.076051215934774	-3.800523026165664
205.0	-1.8395584024793914	2.1238279311395534
205.0	-2.2364928134553823	1.6766950950261106
206.0	-0.37414736583930197	-0.4575928485679181
206.0	0.37646283083907145	0.11943690363323006
206.0	-0.002315464999767632	0.3381559449346845
207.0	-1.170265404935403	-0.6580577436797383
207.0	2.0439786365422643	-0.20249375980059367
207.0	-0.8737132316068629	0.8605515034803289
208.0	0.04931975589810435	4.387977362143299
208.0	-0.7917359157235934	0.4883540774936286
208.0	0.13275549257439034	-2.202561737769522
208.0	0.6096606672511057	-2.6737697018674056
209.0	-1.5576190147274027	0.6712981593827271
209.0	-1.5552939638294618	0.4526968855333452
209.0	-0.3018624278603716	-2.0494762326831295
209.0	2.9920378172014703	-0.36512464546207585
209.0	0.4227375892157405	1.2906058332291133
210.0	0.5867931755214232	0.2755358445650895
210.0	-0.060754966341900585	0.43830082555976096
210.0	-0.5260382091795235	-0.7138366701248646
211.0	0.2720136756449825	-2.1821021880768074
211.0	0.39318635171535954	1.0390447952243362
211.0	0.08194200491769132	1.1531889160919537
211.0	-0.7471420322780485	-0.010131523239487478
212.0	-2.0110294223417813	-1.8659635251278863
212.0	2.4822787040383223	0.07963507329111674
212.0	1.8187435831653251	1.9659238064311797
212.0	-2.289992864861864	-0.17959535459436504
213.0	-2.4177740926240787	-1.4935311098590558
213.0	2.848134372547613	0.2145830723969309
213.0	2.115880424266652	2.5328955399603297
213.0	-2.546240704190187	-1.2539475024981974
214.0	2.9010733741668577	-3.143978481386775
214.0	-0.6349808701148134	4.060810818332149
214.0	-0.997913917389456	3.891339808722132
214.0	-2.9026153481043155	-0.7739500573475263
214.0	1.6344367614417221	-4.034222088319966
215.0	1.7454067724902247	0.8277261936403133
215.0	2.3874852241958573	2.0266817480625314
215.0	-0.2079638833153889	2.588480362455854
215.0	-3.9249281133707044	-5.442888304158708
216.0	-0.8429813238449275	-0.6726405023784012
216.0	1.3289269974442182	-0.8373112283540299
216.0	-0.48594567359930624	1.5099517307324337
217.0	-1.5648801862413266	1.0900142092204013
217.0	-1.9734823654486877	0.5169150247962566
217.0	0.41691686726441857	-2.079792067127471
217.0	3.121445684425585	0.4728628331108038
218.0	1.0384672718331391	3.8369026994570685
218.0	-3.7025371656182147	2.195574006651444
218.0	-2.6214523085003076	-1.3998890325589184
218.0	0.8007134438926009	-3.3414329482803233
218.0	4.484808758392785	-1.2911547252693134
219.0	2.0923901078687277	4.990100489514771
219.0	-3.120886679254939	-2.3608096108214647
219.0	1.0284965713862153	-2.629290878693306
220.0	2.8356682710469676	1.3264631232077289
220.0	-1.0461278831198269	1.0840840111247931
220.0	-2.135395562534822	-0.8510236580899609
220.0	0.34585517460768117	-1.5595234762425607
221.0	0.9780848654517051	-0.5054108494568721
221.0	-0.1723735221164319	1.347738120108947
221.0	-1.7249338097425329	0.5636176186564458
221.0	-0.023079975933687248	-0.7847844453032985
221.0	0.9423024423409326	-0.6211604440052507
222.0	-1.4716440383347256	-2.426093588799862
222.0	0.8533045882246518	0.15666770872860553
222.0	1.0550874415243696	1.5263416076160157
222.0	-0.4367479914142942	0.7430842724552712
223.0	0.1132506820144386	0.9641455858483585
223.0	-0.7805199219674412	-0.9436570043699632
223.0	0.6672692399530207	-0.020488581478386437
224.0	2.606887659899003	0.5352484956337386
224.0	-2.1097823782922904	1.49329438355986
224.0	-2.290057659411535	0.10722732685923315
224.0	1.7929523778048237	-2.1357702060528436
225.0	-0.7633051805645031	-3.115135352447945
225.0	1.3890340946000839	1.2494785056157873
225.0	0.3203896011217484	2.5352109850359152
225.0	-0.08819758979363819	2.4760275555082623
225.0	-0.8579209253636872	-3.145581693712006
226.0	-6.33169629050219	0.3504116671292564
226.0	4.62240936577173	-2.532108556231732
226.0	1.7092869247304834	2.1816968891024633
227.0	0.5104570702169082	-0.13563296493452054
227.0	-0.45660391037164405	1.6120051411655398
227.0	-0.07104583007244183	-0.7261697454644269
227.0	0.017192670227178825	-0.7502024307666082
228.0	-1.4770806890809096	-0.7740941900736232
228.0	-1.3415931202607565	-1.1811851935719357
228.0	1.2500093720720038	0.0028976473275662855
228.0	1.2739832896406635	0.34704600385909884
228.0	0.29468114762900194	1.6053357324589388
229.0	-0.9290692568619424	-0.4119283254019254
229.0	-0.8480419108334558	-0.6055454732369836
229.0	1.7240664949617492	0.47896455515756625
229.0	0.053044672733637416	0.5385092434813985
230.0	-0.9427005584645888	-0.23577075935120514
230.0	0.24029217427927388	-0.12318562025026798
230.0	0.7024083841852872	0.35895637960148263
231.0	-0.643118301071867	0.0178722291334579
231.0	0.2580377175235628	-0.35453244587487276
231.0	0.38508058354829405	0.3366602167413883
232.0	-0.7834778884804984	-3.1137847423014096
232.0	2.069003869672059	1.3908173098100247
232.0	1.5240428273577877	2.475947157966199
232.0	-1.9898205876725577	2.3077660907264566
232.0	-0.8197482208767617	-3.0607458162012713
233.0	-1.7890494998520523	-1.2912237274552647
233.0	2.133542944054387	-2.801408135275458
233.0	2.7325113113664674	2.0631429922696882
233.0	-3.077004755568773	2.029488870461034
234.0	2.119129357420603	1.272578533320745
234.0	-0.05408708688474362	3.2949364536439125
234.0	-2.351742398016564	3.172476349081132
234.0	-4.320718198849406	-2.6397698891659274
234.0	2.1281999561679514	-2.768009388544415
234.0	2.4792183701621964	-2.332212058335405
235.0	-5.0764218354328134	5.700388963435182
235.0	-7.080125923075248	4.827626358721112
235.0	-3.218674082038601	-1.892745884248658
235.0	3.8378541244756805	-9.76009930708098
235.0	10.062077542721248	-2.796810140629996
235.0	1.4752901733497217	3.9216400098033333
236.0	0.5870639674258095	0.4271345073223247
236.0	-0.4426833335561719	0.13460489204775442
236.0	-0.14438063386966069	-0.5617393993700681
237.0	1.4609092726547457	-0.44169721963832775
237.0	0.3936173773613203	0.9399826654389607
237.0	-1.781485505802806	1.9564497092894197
237.0	-1.5501581479643554	-1.148474360999937
237.0	1.4771170037511014	-1.306260794090095
238.0	-5.143044474234803	6.8293754985980035
238.0	-0.755237097791478	-6.208958496288518
238.0	5.374527579536274	-6.099937452768175
238.0	0.5237539924900091	5.479520450458673
239.0	-7.285362554132082	-0.8623087196779876
239.0	-5.6168226217088435	-3.0832996835310578
239.0	4.4966335215519	-4.002107859095361
239.0	6.633502677037253	3.6314602435778216
239.0	1.772048977251734	4.31625601872661
240.0	1.401292040391713	-1.4864595232189344
240.0	0.7627373186211273	0.8532424600945058
240.0	-3.134236429322212	2.6278219242966894
240.0	0.9702070703093751	-1.9946048611722549
241.0	1.3512445005083698	0.9409766197552792
241.0	1.186687276442859	1.2279985032858567
241.0	-1.314366166442323	-0.5500974419124147
241.0	-1.2235656105089066	-1.6188776811287198
242.0	2.017028161470586	3.6089886732091143
242.0	-3.9290804590902244	-0.2313781399752907
242.0	-0.6335596946256465	-3.0923051353822038
242.0	0.08107697758497294	-2.3474067453094367
242.0	2.4645350146603238	2.062101347457806
243.0	1.8605607173093908	-0.12061438130245436
243.0	-0.2047275217089903	1.098766865792457
243.0	-1.6558331956003967	-0.9781524844900223
244.0	0.5835481906722639	-0.6921347191271682
244.0	1.0438199162598885	-0.46049147429432374
244.0	-0.7349758303204507	0.7133814323841435
244.0	-0.8923922766117067	0.4392447610373333
245.0	-2.036326538497548	-0.39071141324317593
245.0	-1.1566296840591337	-1.501681635264036
245.0	0.9495683701420513	-1.7085493464943327
245.0	2.5656139547843164	0.5209517093274567
245.0	-0.3222261023696924	3.079990685674075
246.0	-0.3020986681467908	2.808996251585977
246.0	-3.517268495580396	-0.5427859691918178
246.0	0.4284399841717155	-1.5002545051899951
246.0	1.4883117038123084	-1.4673720489630857
246.0	1.9026154757431752	0.7014162717589032
247.0	0.3073949830205352	-2.5862115581532166
247.0	3.5286691002571775	-1.2854173823436872
247.0	-0.06484152776608292	2.032899420137819
247.0	-1.5468569128479144	1.7200007351584166
247.0	-2.2243656426637295	0.11872878520066757
248.0	0.28838682636190544	0.3805955779193785
248.0	0.21314682687284064	0.45900697395349466
248.0	-0.4256469724388561	-0.37491505438230377
248.0	-0.07588668079588988	-0.46468749749057725
249.0	0.8965420808737383	-0.700816688160809
249.0	0.3793584850437226	0.6160617303217721
249.0	-0.5795874983134142	0.2127195300300926
249.0	-0.6963130676040413	-0.12796457219104262
250.0	0.9273035438489656	-1.790086473064667
250.0	7.333666382924676	3.9161129723284183
250.0	-3.863141036168768	1.2165383531447271
250.0	-3.3575859402439523	-1.1991637348472595
250.0	-1.0402429503609278	-2.143401117561226
251.0	1.6435217635854222	-1.693939975997706
251.0	0.7223442204146595	1.4210525106716811
251.0	-0.7839633051861213	1.3553550057320383
251.0	-2.0849522805800986	0.4258481129402657
251.0	0.5030496017661288	-1.5083156533463096
252.0	2.2162266732027147	-3.313928073955037
252.0	1.2566267563000653	4.082341749968532
252.0	-2.053426686789857	5.152642874060754
252.0	-1.419426742712906	-5.921056550074263
253.0	4.051548247296058	1.9615917243606442
253.0	1.8403337835256635	5.040154030433002
253.0	-5.89188203082172	-7.001745754793645
254.0	-0.5499748814493176	0.3493219652604947
254.0	0.050744649750286114	-0.7792584013865212
254.0	0.4992302316990198	0.4299364361260525
255.0	1.5147511318607632	2.0333073238022963
255.0	-3.056588552881581	-1.5759834258703094
255.0	-0.6174849601550273	-2.2581587652851263
255.0	2.1593223811758393	1.800834867353136
256.0	0.7369205001778634	-0.19760291777388533
256.0	0.3031159195625763	0.7026164666518382
256.0	-1.0400364197404421	-0.5050135488779388
257.0	-2.201466839972577	-1.6016927962665986
257.0	0.6259739680327014	-0.09527940493330644
257.0	1.7784052747122663	1.037250046057325
257.0	-0.2029124027723907	0.6597221551425799
258.0	4.184380727526416	2.261155234069301
258.0	-5.807540999935934	0.39270545931183276
258.0	-5.940256409721599	-0.6726555176944315
258.0	2.6997448065757292	-1.9885927034116753
258.0	4.863671875555375	0.007387527724963584
259.0	-0.22246591819817385	-0.18805436137201073
259.0	0.16270923697093356	-0.0775557129030552
259.0	0.05975668122723993	0.2656100742750516
260.0	0.18412761561297508	-0.16540914403916965
260.0	-0.04366932405388198	0.36212960351226053
260.0	-0.14045829155910067	-0.19672045947311081
261.0	-0.5448489446624526	-0.3689563737702127
261.0	0.15418507794438333	-0.47317423859670976
261.0	0.39066386671804654	0.8421306123669446
262.0	2.1622667626015755	6.0879998242333135
262.0	-3.4414707154093738	-3.1294568229515063
262.0	-0.6072160748727148	-3.9066124870142658
262.0	1.8864200276805199	0.9480694857324438
263.0	1.9215459526878116	-1.3483107256681073
263.0	0.6026123695084786	2.104730985398209
263.0	-2.5241583221963144	-0.7564202597301162
264.0	-3.059771568223931	-0.9277406018697074
264.0	1.3198418240477217	-1.3271063525551003
264.0	1.7399297441762074	2.2548469544248007
265.0	-3.091513487629449	2.3322459882117936
265.0	0.7279549811691177	-5.1032484934308835
265.0	6.564723025375104	-2.1747418181480844
265.0	-4.2011645189148	4.94574432336717
266.0	0.5079029840922169	-0.5756671927484966
266.0	-0.5780251250632519	1.2975190757590032
266.0	0.07012214097105283	-0.7218518830105155
267.0	4.440541001003175	0.941286768828937
267.0	-3.7851773010595116	0.8301936025294612
267.0	-3.4210846867926348	-0.38450229281210085
267.0	2.765720986848994	-1.3869780785463202
268.0	-0.009449777371811694	0.07920261826771274
268.0	-0.023582285399437363	-0.1613802313348026
268.0	0.033032062771206114	0.08217761306708499
269.0	0.1235378800671724	0.01794015247617215
269.0	-0.04095858846094374	0.06192655622682478
269.0	-0.08257929160623592	-0.07986670870298998
270.0	0.19008874490233024	0.19062569109181446
270.0	-0.21608285491489035	0.3329798582937607
270.0	0.02599411001256099	-0.523605549385591
271.0	-0.1663682550164133	-0.09813012833033732
271.0	-0.005214079078580001	-0.22969240545877917
271.0	0.17158233409500748	0.3278225337891093
272.0	-1.912429406416897	4.3983300794806715
272.0	-2.1073099034503966	4.395978049834817
272.0	0.004502188282358642	-4.763627689548481
272.0	4.0152371215849465	-4.030680439767016
273.0	-3.152646300257343	2.2572709509736533
273.0	-3.0844891684749154	2.00229537001951
273.0	-0.5724958097605694	-2.050580517646496
273.0	2.0640310873642846	-3.6150922559030114
273.0	3.6757218410274537	-3.0926439321663524
273.0	1.0698783501010807	4.498750384722696
274.0	4.135456322890975	0.2888606534735103
274.0	-0.9025894868556963	1.4023548745481467
274.0	-1.9432096371366705	0.646004476877829
274.0	-1.289657198898628	-2.3372200048994816
275.0	0.49297248144642214	-2.4871396965393253
275.0	1.9322119043963435	-0.9172186418723384
275.0	1.9775474945866258	1.6200157413589402
275.0	-2.018314456230546	1.3899780582948404
275.0	-2.3844174241987885	0.39436453875786837
276.0	-0.5721651518160551	-1.2952936462452156
276.0	0.393899554347503	0.4561190586100606
276.0	0.17826559746852738	0.8391745876351409
277.0	5.1225280497737735	-2.8425104406604516
277.0	3.1957625617040213	0.6010696819664219
277.0	-6.11846115740184	2.6066269312113812
277.0	-6.1382644495733905	2.542084243178144
277.0	3.9384349954974405	-2.9072704156954994
278.0	-0.6387402573332732	6.297609488494003
278.0	-6.935734725597737	1.4889794237083922
278.0	-3.689066714109494	-4.107378711236584
278.0	11.263541697040525	-3.679210200965804
279.0	0.974629061925896	0.9834085457234228
279.0	-1.6677984997697968	-0.5460023556011433
279.0	0.6931694378438875	-0.4374061901222744
280.0	0.43426068007921625	0.8400119419709908
280.0	-0.9616531654893277	-0.41298476869210604
280.0	0.527392485410126	-0.4270271732788828
281.0	0.3119331088785243	1.0114295749935995
281.0	-1.266760332144431	0.6105291409606013
281.0	0.42560236588969985	-0.7948507212799074
281.0	0.5292248573762208	-0.8271079946742935
282.0	-5.374082413300299	-1.6503732818967662
282.0	-4.5254317319188395	-7.520587229829678
282.0	6.70952814750972	1.2827907776050873
282.0	3.1899859977094636	7.888169734121363
283.0	2.1130425567874513	-0.40426569545894964
283.0	-0.6441883948371793	2.6705281847989157
283.0	-2.712571676380201	-0.9376688574275531
283.0	1.2437175144299317	-1.3285936319124196
284.0	-0.5977088317269176	0.676828672208353
284.0	-0.640646522394699	-0.43585938667584084
284.0	1.2383553541216163	-0.2409692855325118
285.0	1.3689334581044952	-0.20434298321726319
285.0	1.205410795649859	1.103110853366818
285.0	-2.0228757402822897	1.8326794921936465
285.0	-0.5347839123062964	-1.2867401816348945
285.0	-0.01668460116576363	-1.4447071807083876
286.0	-5.2538128590759445	-0.9629588039366138
286.0	-5.531172551988234	-3.2552135770984183
286.0	1.3318396905135794	-2.4104199967191593
286.0	5.020299377555299	2.9774957101855968
286.0	4.432846342995334	3.6510966675685945
287.0	3.139236383831686	3.246562186512109
287.0	-3.6150402169048403	-2.377729580804631
287.0	-3.147382022817383	-2.639600872400262
287.0	3.62318585589055	1.7707682666927969
288.0	-2.5260825849447026	-2.1213938087406943
288.0	0.026514933056347608	-2.50026282521752
288.0	1.7120255104365671	1.6939697485602574
288.0	0.7875421414517838	2.927686885397951
289.0	0.4877108290790286	0.19246902064445096
289.0	-0.9841637159136549	1.114553254875096
289.0	0.4964528868346282	-1.3070222755195324
290.0	-4.709802521138528	0.6074768711880107
290.0	4.196971163135655	-6.637797132791492
290.0	0.512831358002853	6.030320261603484
291.0	0.9103510129056201	0.6864845792279922
291.0	-1.3725433384436552	0.3852576167043263
291.0	0.4621923255380468	-1.0717421959322917
292.0	0.7226543385579929	2.2909741688310334
292.0	-2.739745072551879	-1.1166846252689702
292.0	2.0170907339939057	-1.1742895435620406
293.0	-3.154112656274203	-0.24415928478220156
293.0	1.4044008540506552	-0.7877850020354138
293.0	1.7497118022235905	1.031944286817622
294.0	-0.9850006075490351	2.457040296960826
294.0	-2.3045883125981788	-1.5162382593121406
294.0	3.2895889201472084	-0.9408020376486812
295.0	-4.9483155534685865	4.476986922338879
295.0	0.0817192417959544	-5.134611156193047
295.0	3.6728404752135693	-3.9857442000341963
295.0	5.020748084571815	-2.1075292973099264
295.0	-3.8269922481127447	6.750897731198292
296.0	0.8386921351764154	0.16514227800296444
296.0	0.06207463637947595	0.7748956845513189
296.0	-1.029459339327182	-0.4141273013630581
296.0	0.12869256777128896	-0.525910661191222
297.0	3.916963478033981	-0.514138151076536
297.0	0.9682664365059763	3.060611435359741
297.0	-4.909250281397221	-0.5175400889137128
297.0	0.024020366857228925	-2.028933195369518
298.0	-3.077699864829879	0.4034345321165397
298.0	3.334155955997542	-1.812440051580724
298.0	-0.2564560911676656	1.4090055194641866
299.0	0.048808384357848275	0.6632586818726444
299.0	-0.6809339152384392	-0.6973664721825007
299.0	0.6321255308805951	0.034107790309850436
300.0	1.5314298672919644	-5.642561498139122
300.0	6.644765751103867	2.3857147130629763
300.0	-8.17619561839583	3.256846785076145
301.0	4.318713214859126	-1.197094883662728
301.0	3.9976115597377	-0.2665255847194129
301.0	-4.68544617617113	4.977340829211978
301.0	-4.6982678194958	-0.35488470145334816
301.0	1.0673892210701177	-3.1588356593764866
302.0	2.174928515524277	-0.6023223953928759
302.0	-2.513455787992708	3.663170849852742
302.0	0.3385272724684304	-3.0608484544598658
303.0	-0.20308475499971387	0.19398906356712142
303.0	-0.10159540775057858	-0.1787045689205772
303.0	0.3046801627502924	-0.015284494646544213
304.0	-0.6152537996812514	0.13685706534518674
304.0	0.10373611974325017	-0.3345805853443397
304.0	0.5115176799379875	0.1977235199991697
305.0	-7.735543229205334	-4.336255700910019
305.0	5.487514990562993	-1.7066401552901465
305.0	6.495553086406907	1.3965825889299917
305.0	2.883038285747467	4.292400166499747
305.0	1.4734943865561245	3.744039726796987
305.0	-8.604057520068158	-3.390126626026565
306.0	2.5045083375261337	2.5767891183628633
306.0	-1.7563295590831092	-0.8993901326800996
306.0	-0.7481787784430269	-1.6773989856827893
307.0	4.721802091386878	1.0842643011536506
307.0	3.0283071099887318	3.8601704651079065
307.0	-3.7046444418696343	0.48969211218533676
307.0	-4.045464759505984	-5.434126878446912
308.0	4.154548037509917	5.405209495416676
308.0	-2.59145730235272	7.655520420789204
308.0	-12.296777405214282	1.1190710786533793
308.0	4.885053104197549	-7.543847040782783
308.0	5.848633565859605	-6.6359539540765
309.0	-3.833277140369811	-1.3606051533659422
309.0	-0.3583712914261481	-1.2235889300355176
309.0	3.4907864779538462	0.6705468443843937
309.0	0.7008619538421038	1.9136472390170514
310.0	9.875909171621785	3.2612112209490354
310.0	8.756179038400392	7.781725198566402
310.0	-9.275673177997918	-4.9854683414300585
310.0	-9.356415032024255	-6.0574680780853765
311.0	-4.3354695575417255	2.482673311253056
311.0	-1.2979321929600478	-4.8495939914854755
311.0	5.63340175050177	2.366920680232414
312.0	0.987121374141865	-0.31418881819422745
312.0	0.5911842888562872	0.6502791270590856
312.0	-1.5783056629981478	-0.3360903088648605
313.0	-4.119180774345094	1.0687350612795667
313.0	-7.738346285927971	-2.7386085771484403
313.0	5.99896706029955	0.6672482863062862
313.0	5.858559999973506	1.0026252295625762
314.0	1.9734804761270532	0.7355889631631795
314.0	-4.486145456464846	-0.3320101443756382
314.0	2.5126649803377963	-0.40357881878755647
315.0	0.05984127822789745	0.013911008051092248
315.0	0.011467618630256318	0.030438507675930083
315.0	-0.07130889685816036	-0.044349515727034924
316.0	3.580798735611174	-6.479201034072055
316.0	12.422794567898341	1.569967578278169
316.0	3.0165711405494737	5.766941218904435
316.0	-11.248630246932146	1.245846970513593
316.0	-7.771534197126831	-2.103554733624133
317.0	-0.02930071066539323	0.009912015685607558
317.0	-0.007375070607365603	-0.11088397906920001
317.0	0.03667578127273582	0.1009719633836037
318.0	-3.1212302583867895	-10.975433373107522
318.0	9.269235097207376	-5.266938500770007
318.0	10.850713402487688	1.6376633336530402
318.0	5.389648739652703	6.034299395035041
318.0	-0.31682210180748727	9.172930956980935
318.0	-10.382469121857998	0.5685546769021669
318.0	-11.68907575729549	-1.171076488693592
319.0	-1.4331414392513282	1.4721490809015816
319.0	-1.9124268444928736	1.0047919205508493
319.0	1.6984941631196224	-1.8206995369905212
319.0	1.6470741206245714	-0.6562414644619168
320.0	-0.07423372256140381	-2.1728296353092444
320.0	0.7313379448823332	2.513923958558117
320.0	-0.6571042223209402	-0.34109432324888256
321.0	1.7019929394978814	0.49946873188792895
321.0	-0.487201830482055	0.33714188126527156
321.0	-1.214791109015801	-0.8366106131531863
322.0	0.6686123389134258	-0.16177255871823484
322.0	-0.14330519206892792	0.7284048320540618
322.0	-0.5253071468444835	-0.5666322733358279
323.0	6.4327497621772185	1.26340203467046
323.0	3.461275653437702	3.457890752057533
323.0	-3.5955723879695145	2.86358059722133
323.0	-6.511963052705469	-3.018090146704052
323.0	-6.471643625359008	-3.6240390165909577
323.0	6.685153650419056	-0.9427442206542933
324.0	-2.67931715368968	-0.4618988488748274
324.0	-0.6983015924546213	-1.7675631266648246
324.0	2.106610866973609	-0.9500060377394922
324.0	1.2710078791706925	3.179468013279148
325.0	11.51739433952917	-2.3527853497697846
325.0	3.7208646121692506	6.3102780454460685
325.0	-15.359277533836645	5.212399706877356
325.0	-5.929724747631593	-1.8977941885026273
325.0	6.050743329769823	-7.272098214051026
326.0	1.4809584470497466	1.950467256673713
326.0	-1.9018443953952666	-0.568258582958845
326.0	0.4208859483455138	-1.3822086737148644
327.0	-2.02592395883219	-1.4323062683734933
327.0	1.2260241863264816	-1.277596752792256
327.0	2.2022219974196524	1.0019547989922744
327.0	-1.4023222249139586	1.707948222173473
328.0	-1.8927365860364975	-0.898258470344587
328.0	-1.4250694977908638	-1.4714097685970173
328.0	-0.5895306014116003	-1.8089508478154426
328.0	3.977893187595541	1.09681292279119
328.0	2.1556549093811714	2.443049330267527
328.0	-2.226211411737742	0.6387568336983587
329.0	0.9957108666124124	-3.6556621114205616
329.0	2.6285403285729907	-4.25499954473544
329.0	0.35735450053359114	6.227678451368765
329.0	-3.7671124795342563	4.059462377048941
329.0	-0.21449321618474346	-2.376479172261654
330.0	-0.9804586434495802	4.77419189951153
330.0	-4.716256476019948	-7.168311708712334
330.0	0.4841950578422207	-8.011953668115146
330.0	5.131587443678319	3.7868934812873976
330.0	0.08093261794897025	6.619179996028547
331.0	1.3601492360551497	-4.512071949860204
331.0	2.309763268601002	1.8724498637881006
331.0	-1.9113384239491709	3.9321308566719515
331.0	-1.7585740807069843	-1.292508770599832
332.0	2.3065247875568833	-1.206957456836115
332.0	-0.43791020100510675	1.4334203282640778
332.0	-1.4759682190762884	1.252185733831274
332.0	-0.39264636747549375	-1.478648605259194
333.0	2.3609776451184574	2.664771261845106
333.0	0.10120926338934685	4.159840843323495
333.0	-4.615269729897609	-4.115263479067001
333.0	2.153082821389815	-2.709348626101591
334.0	-0.36515866352556087	1.8832357827470747
334.0	-0.42000940692059024	0.5913230089736502
334.0	0.7851680704461502	-2.4745587917207104
335.0	-7.184457286074277	2.243072669501371
335.0	4.889561514983083	-6.750967453309723
335.0	6.824887362594667	-4.315773123916717
335.0	-4.529991591503472	8.823667907725069
336.0	-0.316165792954906	-0.13406489031702779
336.0	0.05247517816383144	-0.21568963443420028
336.0	0.2636906147910696	0.34975452475122293
337.0	1.0251657293972705	1.9082231240705176
337.0	-2.525479179040632	-1.106768769655566
337.0	1.50031344964336	-0.8014543544149375
338.0	0.11884752745995578	-0.9330203292544017
338.0	0.8560722053259588	-0.8088653075232232
338.0	0.9318343621413794	1.4038717904382765
338.0	-1.978175895855489	1.2603793104281875
338.0	0.07142180092820294	-0.9223654640888576
339.0	1.8483791172297281	-8.866472435415883
339.0	8.376231227248713	-5.564338071164036
339.0	11.289436710018023	-1.888868632628457
339.0	3.883475785325374	3.988769190205266
339.0	-9.281949304430984	9.616082549574509
339.0	-16.115573535390844	2.714827399428596
340.0	1.8733852708287175	-0.15242241615834456
340.0	-0.16389559871229387	1.181195332133836
340.0	-1.709489672116436	-1.0287729159754986
341.0	0.36494753869454183	0.06432200047086932
341.0	-0.5743967253600032	0.7452948100370926
341.0	0.2094491866654648	-0.809616810507963
342.0	-1.1220241643761644	0.32912992121524764
342.0	0.47387701042533154	-1.1876888388025046
342.0	0.6481471539508473	0.8585589175872548
343.0	-0.7034510826151196	-0.42714669928327226
343.0	-0.5323547285094766	-0.9815986600583922
343.0	1.2358058111245884	1.4087453593416785
344.0	0.9651201809464878	-3.169377813011542
344.0	1.1677297792695962	1.1280389154859412
344.0	-0.986235295398441	1.2463840326062876
344.0	-1.1466146648176498	0.7949548649193149
345.0	1.6316347287923383	-0.738394617799472
345.0	0.3351983295709339	1.2269104724128796
345.0	-0.8669773160884282	0.47227230640407597
345.0	-1.0998557422748452	-0.960788161017487
346.0	-2.595456155485125	-0.35439684430689755
346.0	2.704403919921296	-2.666426022080777
346.0	1.7377856863235488	1.1911264819067802
346.0	-1.8467334507597066	1.8296963844808944
347.0	2.9727360978766053	1.4789663270337856
347.0	2.0146144938088963	3.6282725304663916
347.0	0.17283987214190177	4.292421351145545
347.0	-2.6165503985187177	-4.678526478255831
347.0	-2.5436400653086895	-4.721133730389917
348.0	-0.8099610301074422	-4.0486117984410015
348.0	3.40273028975037	4.008826486165094
348.0	2.0539517860092773	3.2681974732066648
348.0	-1.083073906205271	0.017841496655549387
348.0	-3.563647139446897	-3.246253657586284
349.0	0.8074707452970565	-0.47712155621461966
349.0	-0.2656870867512246	1.2701851426323736
349.0	-0.5417836585458431	-0.7930635864177626
350.0	-0.7551729844597876	3.8011150058911545
350.0	-1.9254128095470235	1.8842065485269368
350.0	-0.5013538241528434	-2.85575722667371
350.0	1.014672947444376	-3.416977083102476
350.0	2.1672666707152786	0.5874127553580942
351.0	-1.7394472180963787	1.7683253941339523
351.0	1.3827164696371452	-3.580415143449635
351.0	0.35673074845922614	1.8120897493156836
352.0	-0.9941672184889762	-0.25573711207330796
352.0	-0.21568241521352882	-1.7194199648715138
352.0	1.044127834839137	-0.37666027329474233
352.0	0.1657217988633839	2.351817350239565
353.0	0.6644896024739582	0.252604970060571
353.0	-0.10180656503938379	0.6989089609221076
353.0	-0.5626830374345861	-0.9515139309826873
354.0	0.6645348666994456	-0.807210080560543
354.0	3.3035482594580596	1.0346988379728406
354.0	2.986611393023224	1.1796218677342771
354.0	-6.954694519180709	-1.4071106251465542
355.0	0.031223597239199978	0.9933055854380806
355.0	-1.2114745955290864	-0.9528684967678206
355.0	1.1802509982898628	-0.04043708867023871
356.0	-11.769661435554283	-2.059030181754768
356.0	-1.5644676843262313	-2.191260419707715
356.0	6.396863707943298	-0.6050799014583386
356.0	6.57117451978922	0.7724736720220088
356.0	0.36609089214799045	4.082896830898812
357.0	0.005959201420146209	-0.019950930669261863
357.0	0.00025592456388000555	0.01830624782601237
357.0	-0.006215125984022183	0.0016446828432635763
358.0	2.263353570467239	0.009195582828066692
358.0	-1.5018633535873127	2.571917804909485
358.0	-2.6663491857361503	-0.8817939878920638
358.0	-0.33252581601115105	-1.5950536831697586
358.0	2.237384784867346	-0.10426571667576016
359.0	1.2701151257283694	2.2561404268333813
359.0	-3.1266400999132506	3.162407252150541
359.0	-3.6570799650907757	2.745410046214198
359.0	1.2426194884484	-2.726809290663213
359.0	1.5194566136970697	-2.813833329584991
359.0	2.7515288371301754	-2.623315104949924
360.0	2.320875191367441	-1.7898991470580814
360.0	-3.0876080872547598	4.254304412585169
360.0	0.7667328958873091	-2.464405265527088
361.0	0.44311543445441914	-1.4348862330242447
361.0	0.2903841400595044	0.0913948886431417
361.0	-0.7334995745139196	1.343491344381117
362.0	-0.12235386588124425	3.872091792580115
362.0	-1.6776096160359375	-5.984366375550693
362.0	1.7999634819171886	2.1122745829705654
363.0	0.13132055618039243	-4.063361308375326
363.0	2.7221948343575653	-1.2056726309137484
363.0	1.3093808557295874	3.2245866527804834
363.0	-2.1875624763384485	2.1092197035479137
363.0	-1.9753337699291127	-0.06477241703932252
364.0	-1.433321784703916	-5.391648544680116
364.0	7.783397647816982	-1.1442322715868785
364.0	-2.7214781130600034	3.3321131587591437
364.0	-3.628597750053108	3.2037676575078544
365.0	0.05916572952453766	-0.7142699811331964
365.0	0.7215925976788554	0.41277704469259335
365.0	-0.7807583272033889	0.301492936440574
366.0	1.0350195796402253	0.5653750528654522
366.0	-0.5941075028257968	0.1783120216133288
366.0	-0.440912076814434	-0.7436870744787957
367.0	4.544344477311593	1.030543646074607
367.0	4.06379484539607	2.23574242257789
367.0	-2.412318089225907	4.574543371839878
367.0	-3.6526469797966765	-1.3885971893311337
367.0	-2.543174253685079	-6.452232251161241
368.0	1.3984605591430677	-1.3655550706531083
368.0	1.507537338306335	-0.9948948326604543
368.0	-1.1554029561748758	2.612812085497064
368.0	-1.3452523089609867	0.8222434909112905
368.0	-0.40534263231349715	-1.0746056730948064
369.0	0.2490788640125556	0.05619445707496403
369.0	-0.2822547533030448	0.17802481945357854
369.0	0.03317588929049658	-0.23421927652854543
370.0	-2.3516220467567823	2.344039006455038
370.0	-2.303042807158166	-0.6853383194052208
370.0	0.6360149580414319	-3.4835826705204207
370.0	2.9902748815850275	-2.785263267313241
370.0	1.0283750142884813	4.610145250783822
371.0	-0.06381039641488068	0.9739884786939771
371.0	-0.8139673176213289	-0.24494111721672052
371.0	0.8777777140362245	-0.7290473614772509
372.0	2.9457376056431808	-3.8935512747946035
372.0	4.247642085231366	0.37987756007906626
372.0	4.579195954169489	3.8346642623061795
372.0	-5.8088599154662255	2.5649776182819424
372.0	-5.963715729577816	-2.8859681658725984
373.0	-2.8493898191688656	-5.756016009096752
373.0	5.36236615185481	0.9305370195446959
373.0	5.636838381171943	2.7912438855060384
373.0	1.619355229915037	6.951004554655392
373.0	-5.346859934018613	-0.9591300882324421
373.0	-4.422310009754281	-3.9576393623769204
374.0	-0.6031655044598027	-4.922574944134118
374.0	4.240594214659425	6.2235240089308865
374.0	-3.6374287101996203	-1.3009490647967683
375.0	-2.8629845968642322	0.034773473716249385
375.0	1.0164357444578165	-0.7336543697894912
375.0	1.846548852406408	0.6988808960732694
376.0	0.010836058239856483	0.1633981017003106
376.0	-0.1393568687588411	-0.010545872797505145
376.0	0.12852081051901015	-0.15285222890280342
377.0	-1.6087443220255644	1.0634251256609963
377.0	0.4578011857969736	-3.24386014666122
377.0	1.1509431362285907	2.1804350210002235
378.0	0.9861060816572208	0.2596970513755035
378.0	-0.6080911525470841	0.7281081580474676
378.0	-0.3780149291101396	-0.9878052094229729
379.0	0.09387030374894262	0.0851574661253789
379.0	-0.271965944709698	0.24290451404583804
379.0	0.17809564096074576	-0.32806198017121396
380.0	-2.669249392253034	-2.1854004072171387
380.0	4.118267826508601	-0.2050370289635957
380.0	-1.4490184342555603	2.3904374361807266
381.0	-3.5985989681688944	-1.5807959088536363
381.0	-0.5302094115441903	-2.131024975209086
381.0	7.629018520090416	0.5145658562388066
381.0	-3.500210140377342	3.197255027823928
382.0	0.7015045160377488	0.3919012911650233
382.0	-0.3329949349940529	0.4011541452377769
382.0	-0.3685095810436959	-0.7930554364028003
383.0	-1.201647960814357	1.3538552992342354
383.0	-2.6571603049958528	-1.8745349871950847
383.0	2.5157035112180215	-0.8837295626817391
383.0	1.3431047545921813	1.4044092506425874
384.0	0.7923581036850823	-1.2306985476879069
384.0	0.013709255392274638	1.13885779251346
384.0	-0.8060673590773522	0.09184075517444153
385.0	0.03670088850730044	0.07244642915728106
385.0	-0.04825196008015676	0.06110583152495508
385.0	0.011551071572884408	-0.1335522606822278
386.0	2.3217995393892825	0.9754635543351204
386.0	0.3995856927374556	0.9828982579431041
386.0	-1.4349748292881226	-0.861328902104058
386.0	-1.2864104028386099	-1.0970329101741552
387.0	-1.2259707633276282	-0.002670103324955278
387.0	0.6788079272100543	-2.1511476409778867
387.0	1.7641739674651025	0.9208731974325552
387.0	-1.2170111313475573	1.2329445468702935
388.0	0.4251574015124097	0.8427497094152283
388.0	-1.7415990531180492	-0.7602258711956684
388.0	1.3164416516056436	-0.08252383821954538
389.0	0.7035238790598817	-0.05077427856152673
389.0	-0.8390169453921356	0.866924249591599
389.0	-0.5595678167535556	-0.5337422556853303
389.0	0.6950608830858318	-0.2824077153447396
390.0	1.0894836352525845	-0.9600402821925791
390.0	-1.8648645116632687	3.6956364517139733
390.0	0.7753808764106683	-2.735596169521395
391.0	-0.0990387962182587	0.12972536811136293
391.0	0.09248392087623825	-0.26228793538150913
391.0	0.0065548753420212455	0.1325625672701497
392.0	-5.134843992705468	6.220435591823624
392.0	-8.993840103002551	3.547898185315223
392.0	1.8826629631812466	-4.872006983375968
392.0	3.9839275915435772	-4.0986099825188695
392.0	8.262093540983178	-0.7977168112440274
393.0	-4.826743480221139	0.2729856929022455
393.0	-3.466831398425301	-2.2713402130502933
393.0	8.293574878646394	1.9983545201480697
394.0	-0.062486624096636224	-0.17868502415544366
394.0	0.02084977819617028	-0.10245223883929326
394.0	0.09805417755973825	0.08583225552612234
394.0	-0.05641733165927001	0.19530500746860785
395.0	-0.4352838442882358	1.2857631439015142
395.0	-0.6177839929096509	-1.1313625756251025
395.0	1.0530678371978932	-0.1544005682764249
396.0	-0.006990152186168542	-0.0551872936410054
396.0	0.0605231707590073	0.02996375733329608
396.0	-0.0535330185728364	0.02522353630770262
397.0	-0.7095805421500216	1.3769680054542406
397.0	-0.8214108402637287	-1.5571691438519535
397.0	1.5309913824137444	0.18020113839771693
398.0	-0.5273819536391968	-0.05425315235555876
398.0	-0.31667282004763164	-0.6463480396580406
398.0	0.8440547736868386	0.7006011920136072
399.0	-0.3325560900047121	-0.10609173640177225
399.0	0.000271467166505335	-0.32305972177309716
399.0	0.3322846228382127	0.4291514581748655
400.0	2.9172226437893034	0.6932158826256752
400.0	-2.0673738471365177	0.8140855737147943
400.0	-0.8498487966528016	-1.5073014563404898
401.0	0.5620355916481087	-2.620440071173659
401.0	2.7474559830575833	-2.222080521398709
401.0	-1.6491849793276647	2.434676989890861
401.0	-1.6603065953780558	2.407843602681507
402.0	-0.7188783148999894	-0.7114533535937299
402.0	1.1280994867490755	-0.562143491991195
402.0	0.9093260405539686	0.9303371849268963
402.0	-1.3185472124030617	0.3432596606580561
403.0	-6.968416177728823	-5.958257353410781
403.0	8.71516484184541	-3.2070437811762393
403.0	3.8577265008968484	7.312997609450841
403.0	-5.604475165013432	1.8523035251362376
404.0	1.112344029488956	-0.6492829694791337
404.0	-1.9886959248191474	2.2056345743929944
404.0	0.876351895330192	-1.5563516049138506
405.0	3.757850322987212	-1.5584465111225307
405.0	1.864336200223592	1.4521705507814677
405.0	-2.897598342166934	0.5037345452543099
405.0	-2.724588181043841	-0.3974585849132345
406.0	3.2231721666751882	-1.8341801634955839
406.0	4.548415237098677	2.5203857532844487
406.0	2.1884308987773804	2.301013816010588
406.0	-5.553852574196993	-1.3308978904434023
406.0	-4.406165728354226	-1.6563215153560598
407.0	0.6249354234264385	-0.6692515302465759
407.0	1.636882409840405	0.45265836418319993
407.0	-2.261817833266847	0.21659316606337198
408.0	0.04403929499707721	-0.45838435290082974
408.0	0.13025997641866827	0.5828100592951592
408.0	-0.1742992714157309	-0.12442570639434332
409.0	-3.2969180172651154	-2.914544586955397
409.0	6.962012791763559	-1.2665002425347254
409.0	-1.3110720622289989	2.2483213619293267
409.0	-2.3540227122694533	1.9327234675607834
410.0	-6.986954680445193	-1.0325368496675646
410.0	2.2906486887981847	-5.34528764237459
410.0	2.9240345748582213	-3.74804657638374
410.0	1.6355649947241047	3.089001226830344
410.0	0.13670642206468753	7.036869841595559
411.0	0.2997507062318694	0.45643524313088973
411.0	-0.904520186421201	0.27971748798212276
411.0	0.6047694801893417	-0.7361527311129952
412.0	4.814044224302441	0.20349593691935655
412.0	-2.4233351571724233	1.4006444136751732
412.0	-2.768872970147833	-0.09417545570906453
412.0	0.37816390301781216	-1.509964894885479
413.0	-0.9155358459579341	-0.26805214035167246
413.0	1.0944650266471891	-0.6693923359398957
413.0	-0.1789291806892568	0.937444476291578
414.0	-0.8750091099497972	-9.989722274714238
414.0	8.495253941268171	-10.454060293688345
414.0	-3.5681465053270784	10.145185102472029
414.0	-4.052098325991282	10.298597465930596
415.0	1.5785071489948979	1.3682480291395949
415.0	-0.062026289102762956	2.3177234456727622
415.0	-2.1854001266705074	-1.521074143471658
415.0	0.6689192667783525	-2.164897331340701
416.0	-1.585284740764337	0.1416970760014696
416.0	1.3722289597794388	-1.3331386545746613
416.0	0.21305578098491554	1.191441578573182
417.0	0.042823597664832416	0.01450497285948062
417.0	-0.032242860073511244	-0.000781854288345516
417.0	-0.010580737591322928	-0.013723118571141989
418.0	1.3496800239648643	3.741440390998894
418.0	-4.366870334707933	3.428670842059895
418.0	-3.5267080819016328	-4.890063001136661
418.0	3.121946483043087	-2.411105571362645
418.0	3.4219519096015665	0.13105733944047943
419.0	0.056204470716400216	-0.05053303196474651
419.0	0.06962288133840089	0.02799053383088036
419.0	-0.125827352054796	0.022542498133871113
420.0	0.5391963792979614	-3.0292846786758427
420.0	2.134440525141922	-1.9805497601076236
420.0	-2.6590089050159538	7.435882227007211
420.0	-0.014627999423935856	-2.4260477882237477
421.0	0.9413648230542516	0.02132759599333418
421.0	-0.38130602688458215	1.4668553481929225
421.0	-0.5600587961696553	-1.4881829441862575
422.0	-0.11544727513528052	0.780607488900994
422.0	-1.7942737903766686	-0.8224928704134219
422.0	0.5632476170327004	-1.0629556834338163
422.0	1.3464734484792487	1.1048410649462443
423.0	-2.32558399444934	1.1565859112659853
423.0	0.9167692891353144	-2.570255913459777
423.0	1.408814705314025	1.413670002193788
424.0	0.40365962599407756	0.3759964839034562
424.0	-0.5320909767249772	0.4844646484800849
424.0	-0.6259415526660733	-0.5839437166794923
424.0	0.7543729033969733	-0.27651741570401955
425.0	-1.462042116804384	-3.840941444696787
425.0	0.6008721041762709	-4.475190564422633
425.0	0.8611700126281239	8.316132009119432
426.0	3.5071318106082296	-2.612424668668368
426.0	4.07195945444717	-0.9160444722429412
426.0	-7.039567720448299	4.468901280332629
426.0	-0.5395235446071094	-0.9404321394213189
427.0	0.14655858455912027	-0.09401507335819868
427.0	-0.07586132618676794	0.09671705899519381
427.0	-0.07069725837233672	-0.002701985636992199
428.0	0.07703874544404563	0.12897292050722234
428.0	-0.11170027563159193	-0.09045572942328277
428.0	0.03466153018753923	-0.03851719108394007
429.0	-0.18506942388471678	0.1510726888459678
429.0	-0.10686343366114093	-0.25541111244247905
429.0	0.2919328575458293	0.10433842359650726
430.0	-0.6932719486371492	0.1417924596252099
430.0	0.02884776830806905	-0.6718792909001929
430.0	0.6644241803290613	0.5300868312750053
431.0	-0.12929277184946084	0.10976775591506586
431.0	0.04380265110910401	-0.08452434994721253
431.0	0.08549012074034887	-0.025243405967841553
