# Supplementary material
Source: ML conference proceedings conference paper supplement (https://openaccess.thecvf.com/content/CVPR2021/html/Harel_Crossing_Cuts_Polygonal_CVPR_2021_paper.html)
Supplement: Supplementary file 2 [file Harel_Crossing_Cuts_Polygonal_CVPR_2021_supplemental.zip › Dataset/D4/p9/pieces.csv]

piece	x	y
0.0	-0.2436108296576991	-0.0912214284834549
0.0	0.3734291456789582	-0.011924997799617173
0.0	-0.12981831602127505	0.10314642628304752
1.0	-0.2974156740524955	-1.7616999131643414
1.0	0.9694115016790733	0.3890561237137971
1.0	0.724043952175518	1.3530234569028503
1.0	-1.3960397798020885	0.019620332547693745
2.0	-0.6637825698608762	0.94272238158609
2.0	-1.5841074971278806	-0.1868931028303867
2.0	0.6682942358167182	-1.411231717853927
2.0	1.57959583117204	0.6554024390982204
3.0	-2.371595683510052	3.142994256826815
3.0	1.0266637273628205	-3.5433691354597183
3.0	1.2324584217509873	-3.3265299753857636
3.0	0.11247353439627628	3.726904854018652
4.0	0.06501110899634277	-1.3787258018192283
4.0	1.5946718930523918	-0.14620314552730276
4.0	-1.6596830020487208	1.5249289473465346
5.0	-1.9941868852671265	-10.21207028204975
5.0	3.6391811129238887	-5.287580339604016
5.0	6.672728000313653	12.876610435148423
5.0	-3.448305537791623	12.028114858912012
5.0	-4.869416690178778	-9.40507467240669
6.0	2.8319891113078524	-2.8299111275691926
6.0	4.356011852808795	-2.3338212537285914
6.0	0.11777703144599291	5.379835835841237
6.0	-1.9923362422177207	3.8553997030592924
6.0	-3.5653961734470063	-1.1505230618516546
6.0	-1.7480455798979444	-2.9209800957510965
7.0	-0.8383587869406106	0.2485043709376655
7.0	-0.8762793394679307	0.16951525658241842
7.0	1.2697278951564215	-1.6290510210627411
7.0	0.6083038624334492	0.4899946133933261
7.0	-0.16339363118134353	0.7210367801493237
8.0	-11.821287653776453	-10.68688519550462
8.0	11.309356663065936	6.700190459589754
8.0	11.193318625584693	7.234385181401298
8.0	1.0830708865017225	4.977859189804636
8.0	-11.764458521375893	-8.225549635291095
9.0	2.8434967717534874	6.837653884305856
9.0	-4.432012407728759	3.9860871056246028
9.0	-6.785796318285606	-6.010925022571099
9.0	1.760276508501156	-4.328762825673389
9.0	6.614035445759719	-0.48405314168597663
10.0	-1.6230181863654722	2.2982141208925855
10.0	0.5591275475292216	-2.486007240840197
10.0	1.0638906388362441	0.18779311994761477
11.0	7.756859521610831	2.207681182099221
11.0	-0.9344771515413899	2.78376919557134
11.0	-3.769246586418752	-2.510555770996631
11.0	-3.0531357836506974	-2.480894606673951
12.0	0.08043301880338544	-0.15982676453115363
12.0	0.12814554435120235	0.39362186608151506
12.0	-0.20857856315459947	-0.23379510155037217
13.0	-2.3810719772236735	7.83994311654567
13.0	-7.7074214806274055	3.7464715128020836
13.0	-4.86065280288377	-1.1481278593450945
13.0	-1.677338808558978	-3.71813854807185
13.0	7.6665113666319025	-3.9389616704563117
13.0	8.959973702661953	-2.78118655147453
14.0	0.4563849888167624	1.1297511495587014
14.0	-1.4945664776756764	-1.5858585364060263
14.0	1.038181488858921	0.4561073868473255
15.0	2.6002629635842722	0.3464390735072557
15.0	-1.2831877903477382	0.6281957266380852
15.0	-1.6813825044490558	0.32169810826390105
15.0	0.36430733121252185	-1.2963329084092419
16.0	-0.03834681391472774	0.6511076920252078
16.0	-0.5353385541829361	0.7270553215298525
16.0	-0.3053531796675882	-0.14589265336023297
16.0	0.16536321760576161	-0.9339132196795898
16.0	0.7136753301594784	-0.2983571405152479
17.0	-7.197672392791966	7.548816565437268
17.0	-4.247032826032354	-10.552763130592314
17.0	-2.658540725756034	-10.169811162905965
17.0	11.018766727887296	4.360312727750557
17.0	3.084479216693109	8.813445000310479
18.0	0.5786519902320574	-0.3288162604316817
18.0	0.5249510173698334	0.42014757293065386
18.0	-0.31039168618352886	0.7931256532746742
18.0	-1.136203952417972	-0.4057536359279935
18.0	0.3429926309995955	-0.47870332984565483
19.0	-2.484175438595198	-0.516951983497541
19.0	1.8994352473134801	-1.0939384852230307
19.0	1.382482321835716	0.3139411435618415
19.0	-0.7977421305539628	1.2969493251587276
20.0	-0.7576812302706533	0.08984502908223846
20.0	-0.25355646436132967	-0.8318233408668486
20.0	1.8345487871272907	0.14271428271310668
20.0	-0.8233110924953014	0.5992640290714846
21.0	1.8017444446271442	-0.5772122679738303
21.0	-0.3752495337356544	2.026749689603057
21.0	-1.4264949108914806	-1.4495374216292376
22.0	0.3406692702317416	-0.6222893494664875
22.0	0.32031850156642955	2.002513421698942
22.0	-0.6609877717981643	-1.38022407223243
23.0	0.022603125990044187	-3.639546955090693
23.0	9.145989983463032	0.6656568762599303
23.0	-2.653534699287176	1.851896172983075
23.0	-3.252457014083636	0.9970618413584956
23.0	-3.262601396082299	0.12493206448915503
24.0	0.5513692284305427	-2.125755552593801
24.0	1.4672952455135249	-0.9215464052092489
24.0	-0.8990631499209076	1.4973402155083722
24.0	-1.1196013240231901	1.5499617422946737
25.0	1.1464534771495165	3.0716184138124847
25.0	-3.816543022627472	0.11521452768707233
25.0	-2.6840281524624263	-3.5370314935065945
25.0	1.326997953977226	-3.22217396124933
25.0	4.027119743963144	3.5723725132563566
26.0	-2.3466497169187273	0.31825728731590613
26.0	-2.1809324000072072	-2.062549753053774
26.0	-1.0242964736452593	-4.6047720848789995
26.0	5.568576039866812	3.1649885565468083
26.0	-0.016697449295618862	3.184075994070003
27.0	-2.7385911883308833	-4.8747668515742175
27.0	4.675438817970491	5.463958041348159
27.0	1.0696810661874094	4.527891818207009
27.0	-3.006528695827016	-5.117083007980948
28.0	-3.4190463121719157	-1.2295677793069406
28.0	1.6312561174381914	-1.6372220216039515
28.0	3.9973513169160277	0.19867910496151342
28.0	-2.209561122182295	2.668110695949394
29.0	-5.099201436036375	-2.315864819814762
29.0	3.3919739843767895	1.0403549130108247
29.0	1.7072274516595685	1.2755099068039266
30.0	-0.02859139288813289	0.2531794402383896
30.0	-0.6834009131946852	-0.45878224510327525
30.0	0.4659670115445835	-0.10142672369854934
30.0	0.24602529453822153	0.3070295285634405
31.0	1.4070940563344951	-1.612492473553405
31.0	0.9536066077364657	3.989632167986027
31.0	-2.151211911778527	-0.015671964003014533
31.0	-0.20948875229242028	-2.36146773042961
32.0	-1.4986431668522604	-2.9595568785594364
32.0	3.1703305008205205	-1.2135956051776176
32.0	1.0049616747599164	3.2888624699331257
32.0	-2.6766490087281336	0.8842900138039218
33.0	2.6492348543107163	1.273250829275225
33.0	2.1676642145258347	2.065136349873398
33.0	-0.624040014339737	1.9980265319102597
33.0	-3.6089206626911525	-1.9351833566441325
33.0	-0.583938391805663	-3.401230354414773
34.0	-1.5046743934589133	-0.12307304119484043
34.0	2.3719849967187443	-1.2821236511585057
34.0	-0.8673106032598418	1.4051966923533559
35.0	3.2217857497685563	-6.619378242553538
35.0	6.313193209499071	2.6364175155447946
35.0	-3.697092506290752	4.380912082289042
35.0	-5.83788645297689	-0.39795135528028613
36.0	3.3418595138751535	-1.8525961520532142
36.0	-1.8682230911237467	3.623295744555422
36.0	-1.4736364227514196	-1.7706995925021956
37.0	-1.2372337867722627	2.5753747851539686
37.0	-3.687052092053074	-1.0138985546777206
37.0	-0.33834948746004834	-3.1343507640275536
37.0	1.7297571161978953	-1.8072106956268004
37.0	3.5328782500874922	3.3800852291780994
38.0	2.8820637453483773	2.0949414538720816
38.0	-4.208837377710367	2.9264528237444187
38.0	-1.3378986359052043	-1.9556752460344715
38.0	2.664672268267223	-3.065719031582016
39.0	1.816674932811572	1.9123949273565397
39.0	0.6184910357265749	3.247408106858889
39.0	0.31548999296065283	3.194337853031885
39.0	-2.793567406522276	-2.04019352327612
39.0	-2.6068613630145707	-2.9693980092387124
39.0	2.64977280803802	-3.3445493547325307
40.0	0.08205450694137804	-0.09308815028100886
40.0	0.008435838074852991	0.1746111401216241
40.0	-0.09049034501622769	-0.08152298984059542
41.0	0.5300529023450854	-3.020648887867098
41.0	1.17484679834785	1.99317127065192
41.0	-0.07273015594306041	2.369283112839567
41.0	-0.7742405969549874	1.6242386483696336
41.0	-0.8579289477948675	-2.966044143994021
42.0	5.032182293255015	5.79113192354589
42.0	-8.296736077628578	9.457729326457152
42.0	-8.68819574741269	9.27750360787959
42.0	-9.148876947926764	7.7396043282790705
42.0	7.861317992881254	-27.670193096418398
42.0	13.240308486831736	-4.595776089743292
43.0	0.9914974600075593	1.063909851014825
43.0	0.5573056609448421	1.2214011607833666
43.0	-1.54880312095237	-2.285311011798196
44.0	0.6262370965768286	4.713870379915093
44.0	0.08538582262657111	4.430089388863244
44.0	-2.793918233194672	-2.531849582007354
44.0	-1.6501155154983713	-3.9002439083429894
44.0	1.4284981244727581	-5.914349358178082
44.0	2.303912705016883	3.202483079750041
45.0	0.6386860543979843	-0.8746557684890559
45.0	5.748949892138725	4.879400692801028
45.0	-1.2585319369398882	3.3068366190212863
45.0	-2.6403293857080468	-3.6121320361347706
45.0	-2.4887746238887862	-3.699449507198503
46.0	5.206684101428761	3.442888506452155
46.0	4.058406242352785	4.362736546564072
46.0	-5.30392821556137	2.426595445727013
46.0	-8.917816796550873	-0.995321039746729
46.0	-6.430460097315518	-3.312736879457287
46.0	5.250422185613698	-3.107428839036517
46.0	6.136692580032507	-2.816733740502678
47.0	3.8570151561761294	0.10570415236052969
47.0	-6.122038300849296	3.1088244675639007
47.0	-6.5098662956276705	2.0740573533911357
47.0	-1.4278268309892395	-1.692236562614234
47.0	10.202716271290072	-3.5963494107013414
48.0	-0.41632861423341916	-1.7406649918560309
48.0	2.169474547772466	-0.897923023097629
48.0	-0.6102792522952661	3.246203158929225
48.0	-1.1428666812437631	-0.6076151439755557
49.0	-2.427954604407373	2.123201728456454
49.0	0.6660794239464933	-4.74241106552534
49.0	3.098222748384142	-1.4611749915763028
49.0	-1.3363475679232768	4.080384328645217
50.0	3.1526965559308637	1.9744372159640802
50.0	-6.914920612384079	-0.5329144578923609
50.0	-4.277127178999819	-1.4520068784495201
50.0	3.9758044101689314	-0.026021187110501855
50.0	4.063546825284099	0.03650530748831709
51.0	-3.140435021487454	4.3702520322183
51.0	0.48444437382871164	-4.454392698586854
51.0	1.0444597090711578	-4.352902395995452
51.0	1.5189383421160305	-0.16184742945286468
51.0	0.09259259647155735	4.598890491816871
52.0	4.4683175171965335	-7.116210861171114
52.0	4.397664746285212	-5.411796629940618
52.0	-2.813081936068196	6.2080408673979415
52.0	-6.0529003274135365	6.319966623713775
53.0	3.2189111917788513	-3.969602953395181
53.0	3.384157770304915	1.7473522168387587
53.0	3.3906750647493915	2.9607000824029908
53.0	-2.0453414849882887	4.553125322196983
53.0	-4.5170290049023825	-1.7508271182533564
53.0	-3.431373536942542	-3.540747549790165
54.0	-2.589590121287682	0.5816577645490099
54.0	2.0384692500516155	-3.313605474525623
54.0	2.4342957594823424	0.6750710718316979
54.0	-1.8831748882462866	2.056876638144927
55.0	0.7033728982545459	0.24682384198376545
55.0	-0.49030367978059897	0.052964014315173426
55.0	-0.21306921847394927	-0.2997878562989362
56.0	-2.1098760682076976	-1.06623340337445
56.0	0.6695679506753719	-0.4446911647030311
56.0	1.4403081175323347	1.510924568077477
57.0	-0.14020903479787164	0.42402868516502357
57.0	-0.35127023073492875	-0.2704900081162589
57.0	0.2609620039145535	-0.13976530780822646
57.0	0.23051726161828154	-0.013773369240566808
58.0	-0.6498112456771413	0.3140449019244115
58.0	-0.7294075129473012	0.0856429390937849
58.0	-0.11747771749149037	-0.6681491570861959
58.0	0.7400696252013939	-0.0025016628352526127
58.0	0.756626850914539	0.2709629789032806
59.0	-1.3885166686005685	-0.5572195900623779
59.0	2.8901739566290883	-1.2318890375207538
59.0	0.16720685294258028	1.7469076016129759
59.0	-1.6688641409710898	0.04220102597015745
60.0	-0.6949522489471115	-1.321069826529469
60.0	1.074579426549365	0.3814723380197352
60.0	-0.3796271776022674	0.9395974885097289
61.0	1.611312940636064	-2.784015399105606
61.0	2.030446639410423	-1.56948092316869
61.0	0.03981092585221335	1.345709823743342
61.0	-0.6386081153027735	1.7152602775388976
61.0	-3.0429623905959082	1.2925262209921171
62.0	-0.37458237943923733	-1.8019628131746797
62.0	1.1900463915465804	1.9608607295224485
62.0	-0.815464012107343	-0.15889791634776892
63.0	-0.01345607796445654	0.05352296440724634
63.0	-0.01170886283641187	-0.03217096716345027
63.0	0.02516494080088226	-0.02135199724380083
64.0	8.668550128718566	-9.706389026160851
64.0	8.737170698179856	-9.66987806989528
64.0	2.3226843205592886	10.958389214157153
64.0	1.0736182250978366	11.197947424995291
64.0	-2.0945301843924025	9.494071970860471
64.0	-12.412895051416186	-3.5817679585014712
64.0	-6.29459813674699	-8.692373555455294
65.0	2.6134575793260124	-2.213719002221184
65.0	2.6212438291736375	-1.6591038757865302
65.0	-2.3184655124908375	1.9149411588850191
65.0	-2.916235896008798	1.9578817191227091
66.0	0.26741118349386594	0.631013775032775
66.0	-0.7353857985596639	-0.3281522937501215
66.0	0.4679746150658067	-0.3028614812826403
67.0	1.4153524063689904	0.6155112508190957
67.0	-1.6927221647190547	-0.12318630560074893
67.0	-1.1485333467037102	-1.084936382748584
67.0	1.425903105053786	0.592611437530248
68.0	3.7300470253274973	-2.319389798098612
68.0	3.7185896855137828	-2.2267296119885964
68.0	-1.0954561990928318	2.622955366838614
68.0	-2.4700598189897547	2.154270506961684
68.0	-3.883120692758709	-0.23110646371308485
69.0	-2.0366032790251873	1.2584572032768182
69.0	-4.376977185596791	0.9553593392689204
69.0	0.3865590107328244	-2.9082120416827593
69.0	3.033328036605652	0.21012027278639123
69.0	2.993693417283478	0.48427522635068254
70.0	-0.532738046253921	0.20099810035942756
70.0	0.28885590504482994	-0.24941215449208698
70.0	0.24388214120909438	0.04841405413265315
71.0	1.4624148563753354	1.735497248400892
71.0	-1.9862358097087762	-1.2752080822885914
71.0	-1.1109452345870785	-1.7262920958798558
71.0	1.634766187920526	1.2660029297675537
72.0	0.33151924681741457	-0.0639118564114906
72.0	-0.5032580358846137	0.3485410450540535
72.0	0.17173878906717152	-0.28462918864257847
73.0	-0.4023109389220771	0.304899387670511
73.0	-0.02318853432959763	-0.1213468511045698
73.0	0.425499473251671	-0.18355253656592382
74.0	-0.9568670013402489	-0.6918871156030291
74.0	-0.004935520310647718	-1.9857406892714549
74.0	0.505975592461678	1.3221148166649017
74.0	0.4558269291892237	1.3555129882095687
75.0	-3.206212607799484	-2.4773459544100978
75.0	2.55779297188793	0.11605707062386539
75.0	0.6484196359115385	2.361288883786228
76.0	3.3500637750433424	-2.717532863881093
76.0	-0.05738835426621988	4.082857673291749
76.0	-6.362594419997999	1.602779065325008
76.0	3.0699189992208757	-2.968103874735664
77.0	-1.9301051147600612	0.6431286876673713
77.0	0.3283191785161481	-3.902565820084313
77.0	3.5336669694967635	2.501598835806622
77.0	-1.9318810332528713	0.757838296610326
78.0	3.873172203538922	6.386338790096277
78.0	-10.209643818585713	-3.262432145299487
78.0	-10.269028581099827	-3.8976877307807176
78.0	5.552262607590154	-5.4455114274029865
78.0	11.053237588556497	6.21929251338694
79.0	0.8141402610445924	-2.027035597509691
79.0	0.5271221074799608	1.914658233858951
79.0	-0.26953313375934557	1.439120153755861
79.0	-1.0717292347651943	-1.3267427901051259
80.0	-0.0636092073862463	-0.010722116145623545
80.0	0.03674199305904901	-0.013388016496876426
80.0	0.026867214327196517	0.024110132642514596
81.0	0.21804612466950607	-1.4140957122689155
81.0	0.43847166225948503	-1.2095617344680816
81.0	0.1044086158830154	0.8704883958662187
81.0	0.028043020978137396	1.0272124933859936
81.0	-0.7889694237901593	0.7259565574848011
82.0	0.35322726190570986	-1.0582777339256169
82.0	0.8548938441964465	-1.0081177410223365
82.0	-0.47841886155548025	1.0074423638390728
82.0	-0.7297022445466731	1.058953111108871
83.0	1.674151976027762	2.9228272977199796
83.0	-3.2254334028699345	-0.7288497283940331
83.0	-1.1504636368580887	-2.5959118583036647
83.0	2.701745063700235	0.401934288977731
84.0	-0.0012423788919532677	0.17949965198512077
84.0	-0.6409197457108315	-0.17067405369653985
84.0	0.6421621246027869	-0.00882559828858384
85.0	0.05003877812634035	0.013441280949646183
85.0	-0.08071855551377329	0.15202808447895239
85.0	0.030679777387436682	-0.16546936542859988
86.0	-4.774474002212622	0.8335200222739854
86.0	5.138472035119978	-2.6791642398774336
86.0	-0.363998032907346	1.8456442176034589
87.0	-5.592483624973349	3.355119813153637
87.0	-5.594376642807195	3.2542969211339843
87.0	0.6900692237836898	-3.0137619939515945
87.0	4.554546380864286	-4.621105913279405
87.0	6.0257138794915575	-2.1204405725072646
87.0	-0.08346921635901021	3.145891745450633
88.0	3.6152350735289542	-5.99690956770135
88.0	3.910306317968814	-5.375148503499039
88.0	2.0827555921352863	1.9636540650703551
88.0	-5.182847898066316	6.257075137689445
88.0	-4.425449085566746	3.151328868440591
89.0	8.704962838085134	4.895619645131934
89.0	0.9752438403325973	2.6737105576787945
89.0	-10.157431020147893	-3.939949456708255
89.0	-10.261076447874581	-4.338433208945742
89.0	10.738300789604775	0.7090524628432928
90.0	0.7208632112889082	-1.2310986229273875
90.0	0.10976968908499454	1.2914588447571778
90.0	-0.8306329003738998	-0.06036022182979251
91.0	0.8682728176642617	1.294838418495694
91.0	-0.9271008819053044	-0.32760038594030333
91.0	-0.7469384553741444	-1.0179976745816541
91.0	0.8057665196151781	0.05075964202625907
92.0	0.5875758941801992	-2.530405331133119
92.0	1.6924852999809405	-2.3517539575827473
92.0	0.8768376094665714	4.256523896648279
92.0	-3.156898803627751	0.625635392067587
93.0	3.6567765728323933	-3.441599619893098
93.0	3.637100901765502	-2.4697123256071736
93.0	1.2034164181638767	2.959137766428319
93.0	-0.9371516819555806	5.545846751347148
93.0	-4.332523456655387	3.87741151101941
93.0	-6.23621393086912	-0.8547157445883012
93.0	3.008595176718316	-5.616368338706304
94.0	2.3405361114932184	-1.202508176695709
94.0	2.7068786296397795	1.1096093167623196
94.0	2.7048445144637694	1.1175488663388726
94.0	1.8880571784468558	1.7744754878595324
94.0	-4.436354944185395	0.07556460141089447
94.0	-5.2039614898582345	-2.8746900956759074
95.0	0.41334604190503865	-0.1546405484315271
95.0	-0.4242146797701787	0.3595292095726044
95.0	0.01086863786514748	-0.20488866114107052
96.0	-0.016388290854203704	0.5180339110128317
96.0	-0.6021208384640742	0.21303973602091023
96.0	0.5455058675461637	-1.2467532496820648
96.0	0.07300326177212206	0.5156796026483346
97.0	1.8506860677519057	-4.183674253466048
97.0	0.9601443644101483	3.2697685948204285
97.0	-0.9824352147134208	4.266839598701875
97.0	-1.8105377250521706	-0.1344043021076446
97.0	-0.017857492396460926	-3.218529637948632
98.0	-0.5487992721285211	1.7407598326124951
98.0	-0.03329231476223136	-1.7524673614986208
98.0	0.5820915868907476	0.011707528886126707
99.0	2.427420248241659	2.554507442240573
99.0	-2.425215249272793	3.0325607108221386
99.0	-2.54914449604172	-2.1361305758693585
99.0	2.5469394970728567	-3.450937577193373
100.0	-1.1144855294279672	3.525981926009973
100.0	-2.6244759456586295	-1.9183606546340264
100.0	2.59767413279612	-5.243130519929451
100.0	1.1645658001116626	0.5003790995383011
100.0	-0.02327845782117909	3.135130149015202
101.0	-3.6346992725897915	-2.510307715147408
101.0	-0.4879781887211537	-3.7172622853263197
101.0	5.552750772462128	4.03924931706756
101.0	-1.4300733111511774	2.18832068340617
102.0	-1.7488854316946192	-4.13667109314418
102.0	-1.0174563045161824	-5.099245564899536
102.0	0.22193222712470573	-4.208751374126501
102.0	2.9355612106091753	2.748819580249368
102.0	-0.39115170152312145	10.69584845192087
103.0	-4.5511472013850245	-1.6070747650924133
103.0	9.248097715277709	-2.442671501469948
103.0	0.9694364609571968	3.3252384884484325
103.0	-5.666386974849891	0.724507778113932
104.0	3.792397859946049	0.4127051157681555
104.0	-1.7875140679389683	2.01587943651541
104.0	-3.5796011732476236	1.245924118725768
104.0	-3.285791775042437	0.6308128854497685
104.0	4.8605091562829905	-4.305321556459128
105.0	1.6439190557947894	-0.9145843354663302
105.0	-0.430776156725585	1.2534322959866275
105.0	-1.213142899069213	-0.33884796052031063
106.0	3.686265993254534	-4.55231578803101
106.0	5.735965255343192	-4.258169702892542
106.0	-2.3736092498985726	3.6726490542139247
106.0	-3.5968631968526656	4.133541317705477
106.0	-3.711159483341868	4.128664830919762
106.0	-3.0995718708488327	1.3294263253700787
106.0	3.3589725523441856	-4.453796037285697
107.0	2.7389080801643026	3.5369790124223637
107.0	-7.310970527375265	-2.4784521912388584
107.0	-4.722404952617028	-3.017837007436239
107.0	2.3357939463397877	-1.8526744069647982
107.0	4.2139244480651685	0.27536464002572764
107.0	2.7447490054230497	3.536619953191825
108.0	2.3370725537007484	3.5201436323740736
108.0	-2.1241725104276283	1.5146423605467907
108.0	-0.212900043273152	-5.0347859929208605
109.0	1.2636061955302595	0.9199579814128015
109.0	-2.7586093285029047	-0.2228533701265185
109.0	1.4950031329726559	-0.6971046112862662
110.0	0.3152242772085258	-2.0334579306032436
110.0	0.8074918825503116	-2.096185133927636
110.0	0.008119608679479758	1.3952812881830672
110.0	-0.12773916370027144	1.471211912834388
110.0	-1.0030966047380903	1.2631498635134188
111.0	-3.035510714876955	-5.075292609386823
111.0	4.828578803483953	0.32207926399325265
111.0	3.9610759389418746	3.3260744864426335
111.0	-5.754144027548898	1.4271388589509248
112.0	3.150226897351724	-3.533033628524373
112.0	-1.6066366747431036	4.31006752825684
112.0	-4.126155427082435	3.0870644850792415
112.0	2.5825652044738194	-3.8640983848117143
113.0	-1.6378209847864302	-2.785630545609708
113.0	-1.0357221308851368	-2.881807951062087
113.0	5.736357843750462	2.1487208466048338
113.0	-3.062814728078889	3.5187176500669657
114.0	1.3972134280741064	-1.6373142228772055
114.0	1.9712013682032972	-1.208846491007119
114.0	-0.5761628547461233	3.189092241398848
114.0	-2.7922519415312768	-0.34293152751451667
115.0	-16.208992574561556	-2.6393701429244016
115.0	-7.984347887918964	-4.218292273342587
115.0	6.711324391610723	-0.3754043250684581
115.0	8.57534585188412	2.7233369687709152
115.0	8.906670218985665	4.509729772564575
116.0	-1.7219617032907886	1.1980192940988168
116.0	1.4103001977962397	-2.863199851129113
116.0	0.9903773880041178	-0.09811551666964989
116.0	-0.6787158825095687	1.7632960736999461
117.0	7.707516364310424	-10.150673971810741
117.0	5.054577670896197	0.039007682391669726
117.0	-5.831981553645286	10.178141204456384
117.0	-14.604852408602712	10.442384949940484
117.0	7.674739927041392	-10.508859864977799
118.0	-3.7457689271236614	-3.358385832990193
118.0	3.492404558882365	-2.5412060655194932
118.0	3.6735373246120435	-2.4461007448116066
118.0	5.122737390713178	-0.9879125431076122
118.0	-0.7442028086595417	7.5977229004012505
118.0	-7.798707538424386	1.735882286027639
119.0	2.132120918107593	0.5000551885137882
119.0	0.17676633510925785	2.6116395076319234
119.0	-1.57854809130228	2.025584320266452
119.0	-1.319379842656198	-2.1391178590499593
119.0	0.5890406807416168	-2.998161157362194
120.0	-0.15747932892030017	-0.8305167674698768
120.0	1.1446667125489625	0.6611426892743079
120.0	-0.9871873836286522	0.1693740781955864
121.0	-1.832220426409147	4.177440339924522
121.0	-4.641968169718904	2.5627716328480648
121.0	0.30222758719722587	-2.8394716072188895
121.0	2.563531314956487	-3.2109151935323306
121.0	3.6084296939743212	-0.6898251720213605
122.0	0.867190823666224	-6.139277377928846
122.0	2.5930297255530883	2.4426678322422366
122.0	-0.3075839848241151	7.265619144428598
122.0	-3.8949847744278556	2.7989097679943966
122.0	0.7423482100326786	-6.367919366736379
123.0	-5.5928904959357935	3.728683167409879
123.0	-5.391888414027958	2.776093170806456
123.0	5.056044816169876	-5.758226868451943
123.0	5.412523816161394	-4.843786890286133
123.0	0.5162102776324332	4.0972374205217745
124.0	-0.3008500708279616	0.35417905822243456
124.0	-0.09788696365172998	-0.20113393010903455
124.0	0.3987370344796916	-0.15304512811340004
125.0	-0.404176431583243	1.0910143208302872
125.0	-1.6849628206837513	-0.67385283201967
125.0	0.3657366029476655	-0.749690671376417
125.0	1.7234026493193226	0.3325291825657886
126.0	-2.746102456752394	1.5124144768784675
126.0	-1.1951358759282231	-2.427885118849227
126.0	3.941238332680624	0.9154706419707784
127.0	-0.31540678746376394	0.47544038706294467
127.0	-0.5387641651253869	-0.40615548918589023
127.0	0.8541709525891539	-0.06928489787705261
128.0	3.6554429946661475	3.645434910861377
128.0	2.132269200017363	5.602289304847529
128.0	-6.3378833697560095	1.8352213550813792
128.0	-0.403089792500381	-5.786539488772313
128.0	0.9532609675728828	-5.2964060820179695
129.0	1.3878389593389608	0.9235774746780281
129.0	-1.2080639371251316	1.6201802845962188
129.0	-0.2777042073371344	-1.0687744835510968
129.0	0.09792918512329563	-1.474983275723139
130.0	0.10305047142523882	1.9291468395370752
130.0	-0.8467447208424685	0.5823629244780232
130.0	0.2791149721172876	-4.16689571349536
130.0	0.46457927729992954	1.6553859494802354
131.0	0.12882324718831367	-0.453694433123383
131.0	0.3659240623482089	0.07706918321097528
131.0	-0.49474730953655677	0.3766252499124341
132.0	1.2546839192752575	3.527405672157145
132.0	-6.250609508220282	2.2809035892266145
132.0	-2.138449220382266	-1.8394192176502866
132.0	1.2385767297303771	-3.7771213436726927
132.0	3.5688869291593486	-3.1115843802517356
132.0	2.326911150437559	2.919815680190983
133.0	0.2936011621916638	0.377968182646966
133.0	-0.4166171228739771	-0.3248790477340402
133.0	-0.3411210590880511	-0.41161084603372733
133.0	0.46413701977035543	0.3585217111208319
134.0	4.135780041976513	-0.44843814011719035
134.0	-2.839672266021289	0.9957709122859889
134.0	-1.296107775955224	-0.5473327721687995
135.0	3.5842387807731453	1.9710950501594369
135.0	-1.6638992780252637	1.0865787220479541
135.0	-1.9203395027478913	-3.05767377220741
136.0	0.6663988544402051	4.033712309374386
136.0	-1.3775489371975431	0.30039650849093447
136.0	0.7111500827573242	-4.334108817865317
137.0	2.1169066148614086	-3.354928660672408
137.0	7.457991818175369	1.9477189449840395
137.0	-1.594773686037823	3.3169377983367423
137.0	-4.221821359763383	-0.24717312532721847
137.0	-3.758303387235596	-1.6625549573211715
138.0	-0.6269880146413098	0.1896802608812377
138.0	0.1906529139399057	-0.19975263227256077
138.0	0.4363351007014231	0.010072371391332711
139.0	0.7308571776340914	2.9096987660237996
139.0	-2.1214644048796383	-2.5501573870111582
139.0	-0.4770949372862632	-2.1661273373724077
139.0	0.612262017998051	0.022463855018199454
139.0	1.2554401465337754	1.7841221033415553
140.0	-0.08174899798567398	5.542571031674204
140.0	-1.6159972107353267	-5.6748903140887546
140.0	-0.34575993440008657	-9.125190929080372
140.0	1.6343067237516673	3.4587870580226574
140.0	0.4091994193694253	5.798723153472269
141.0	-3.7868356580031466	-3.8261395915231518
141.0	-1.9417712277877865	-6.011572324256065
141.0	3.4553017893334665	-2.378447061214391
141.0	4.050473261478718	-0.962448659475139
141.0	-1.7771681650212536	13.178607636468744
142.0	-2.2421011954978036	-1.6411623254677832
142.0	2.313848524861226	-6.722557620521786
142.0	4.42857065048281	-4.232624757315889
142.0	-1.179802300746602	7.384039562634536
142.0	-3.32051567909961	5.212305140670902
143.0	0.18366192837081996	2.109380200950255
143.0	-2.9380296763552947	-0.582426310202764
143.0	-2.221160045968126	-2.343384276221881
143.0	0.9452470698058479	-2.5958856982302527
143.0	2.0502501373106763	1.6849936510437984
143.0	1.9800305868360624	1.727322432660807
144.0	0.2406552078078138	0.3442364540270416
144.0	-0.1696055014231465	0.011297556924732936
144.0	-0.07104970638469658	-0.3555340109517749
145.0	2.8708203690738325	0.14404529028793253
145.0	1.971993261920005	1.969461784546056
145.0	-4.842813630993862	-2.113507074834009
146.0	1.1435795150993953	3.2665966164063667
146.0	-1.7657696227336588	-0.13041193470737902
146.0	-0.5386775650025721	-2.0250159469662257
146.0	1.1608676726368317	-1.1111687347327757
147.0	-0.7141240802359523	0.7201102457909717
147.0	-0.06714148020202979	-2.065381514590361
147.0	0.7812655604379963	1.3452712687993957
148.0	0.43273883126011864	-10.467617200267396
148.0	2.0968303957993846	3.55263156857497
148.0	1.3620941263385755	5.999598698256674
148.0	-3.891663353398067	0.9153869334357612
149.0	4.33029162252719	-5.496137303422882
149.0	-0.3097386424632906	3.466029411365375
149.0	-2.6921084625282066	4.905388934173866
149.0	-3.6196627693345316	2.394322117837773
149.0	2.2912182517988673	-5.269603159954136
150.0	1.8372238364917948	-1.2812457107041264
150.0	2.073687008506468	-0.8953955199991391
150.0	-1.5414069754685749	2.4597505653368295
150.0	-1.7164362249102831	0.12835828460733245
150.0	-0.6530676446193874	-0.4114676192409155
151.0	-1.017622610235058	0.8859954102868913
151.0	-3.221789569111774	-3.3127364030948936
151.0	-2.1742112127760604	-3.216164696751855
151.0	3.5120391475359813	1.328868378011224
151.0	2.901584244586923	4.314037311548615
152.0	-7.5273310710925765	2.654360019108023
152.0	-2.2085366175775447	-5.984053202108548
152.0	6.566112950881564	-4.431935623170662
152.0	9.294646418764204	-0.4625188742620541
152.0	-6.124891680975646	8.22414768043324
153.0	3.486059904402106	-0.6784793182635345
153.0	0.5640420641280559	3.439931644889953
153.0	-3.749188908997115	-0.23202486402879396
153.0	-0.30091305953306163	-2.5294274625975968
154.0	-1.3708369570996592	-0.8900442703276273
154.0	-0.4207615324716174	-1.945908134736895
154.0	2.1454878763190526	-0.8033975197542448
154.0	-0.3538893867477779	3.639349924818775
155.0	-0.8230435455889378	2.8146021427387002
155.0	-2.4141592995258914	-0.8803224680914609
155.0	3.237202845114829	-1.9342796746472395
156.0	3.0036297588370036	-2.7927133454926567
156.0	-0.7892348537321769	2.1963449053082282
156.0	-2.2143949051048395	0.5963684401844225
157.0	0.7786058288989923	1.7320331990924427
157.0	-2.1574075491405833	0.5910976406091625
157.0	-1.4321320932482078	-1.8730397319241732
157.0	-0.1419555637628168	-1.7416144489993544
157.0	2.9528893772526428	1.2915233412219282
158.0	4.96270472902086	-0.7960945214700687
158.0	-1.701638999425399	2.234652253744887
158.0	-2.8903479752453913	0.6585326580650043
158.0	-0.3707177543500722	-2.097090390339827
159.0	1.7417026242044347	1.927464400322176
159.0	-0.568885877844435	4.450500250458146
159.0	-3.1565062860700084	-2.6301576368388897
159.0	-0.11992464291592857	-4.339353429572908
159.0	2.1036141826259493	0.5915464156314557
160.0	-0.3694324163291591	-0.3694073372611722
160.0	0.5833210612363122	0.04493725314169838
160.0	-0.21388864490714324	0.3244700841194725
161.0	1.0990330982972782	-0.6960925627820758
161.0	1.1052325299829697	-0.6956886216573817
161.0	0.23811270049672625	1.0612959030989968
161.0	-2.4423783287769503	0.33048528134047606
162.0	2.5562421933881945	1.0291397295840405
162.0	2.376665720374447	1.072917619871995
162.0	-3.3034425828405043	-0.0689220815097609
162.0	-1.6294653309221359	-2.0331352679462698
163.0	0.8752010299456717	10.999691281663496
163.0	-6.914896693610884	-3.5494786679068224
163.0	-1.369849995617695	-9.341924383738993
163.0	0.2946791966331566	-9.134818669477585
163.0	5.445441730612815	0.4892135787449148
163.0	1.6694247320369358	10.537316860714997
164.0	2.265493846970416	0.13798557473446435
164.0	0.5272695619834216	3.3493100703154157
164.0	-2.5652733481527616	-1.512803171014061
164.0	-0.2274900608010688	-1.9744924740358
165.0	0.5459561071300849	0.12914054010671236
165.0	-0.1330330733712859	1.1976789408559094
165.0	-0.6655103617657969	-0.472704416067573
165.0	0.25258732800700023	-0.8541150648950782
166.0	1.4488626414441141	0.027926078552793047
166.0	1.0426017938764869	0.536370171598198
166.0	-0.007654717645839077	0.46049331611100563
166.0	-1.0254518330376345	0.08492681219394706
166.0	-1.458357884637139	-1.1097163784559358
167.0	1.3858870968768044	4.061201368230507
167.0	-5.086096873706595	-0.4476882557362272
167.0	3.70020977682979	-3.6135131124942794
168.0	0.647660569731971	-0.43997767249170006
168.0	-0.21967777960128262	3.189045477079701
168.0	-0.42798279013067303	-2.7490678045879857
169.0	-0.4288420869738298	-0.6012216615892899
169.0	0.4543819926544423	0.14877420320251422
169.0	-0.025539905680609685	0.45244745838677347
170.0	-0.22794670579719747	-0.2814457619385323
170.0	0.43895957935859325	-0.09120474825373102
170.0	-0.21101287356139947	0.3726505101922869
171.0	10.965102006344637	7.614050177562981
171.0	9.103129063528142	7.484499455782947
171.0	-5.824252070548823	-1.71186844288083
171.0	-6.327282095516345	-2.1935017143254214
171.0	-7.991967243591888	-4.711606123332526
171.0	-5.69155714094195	-6.237641151660669
171.0	5.766827480726228	-0.2439322011464797
172.0	-1.499912495334541	2.8518568555543693
172.0	0.528930066582546	-3.1032307413597544
172.0	0.5604287308454565	-3.0162770765997555
172.0	0.41055369790655133	3.267650962405139
173.0	-2.795499106788243	0.1828434132560645
173.0	-0.13826813930797083	-2.5868398000756048
173.0	1.4492040301963411	-0.4756941404915347
173.0	1.4845632158998947	2.879690527311093
174.0	2.102794844623316	3.8928434645335193
174.0	1.9847613456755393	3.971715783983385
174.0	-9.218844842657914	-2.1718686881346305
174.0	2.543709174172028	-8.77232018448147
174.0	2.5875794781869903	3.0796296240992214
175.0	-0.2659131505722207	-0.7081296846391899
175.0	0.5341089402949564	0.27732453827699033
175.0	-0.2681957897227257	0.43080514636219897
176.0	2.027747024219693	-2.150972610833179
176.0	2.5409220818088074	1.082919842254126
176.0	-2.2647218467617636	0.6983209362463667
176.0	-2.303947259266742	0.3697318323326814
177.0	-3.186960364049896	-3.000013977719961
177.0	6.314781093783982	1.2010650552959794
177.0	4.7864807320795	3.1684484558610277
177.0	-7.91430146181356	-1.369499533437034
178.0	2.8048759103592107	2.4903382021217313
178.0	-2.04550616656315	-0.43408768474471743
178.0	-0.7593697437960717	-2.0562505173770225
179.0	1.8634472457705884	0.9487540345470634
179.0	-1.8301634068315273	1.4382051465500187
179.0	-4.656509525601529	-0.6771130680307507
179.0	4.623225686662478	-1.7098461130663258
180.0	0.05024069554910568	-0.6707782879026194
180.0	0.3110833183688788	0.5204386876077252
180.0	-0.3613240139180218	0.15033960029487364
181.0	-0.24645996963193717	-0.1513158417944902
181.0	0.6456568477692604	0.04488045818372229
181.0	-0.3991968781373239	0.10643538361077794
182.0	7.5600622271846385	13.60017671685711
182.0	-20.98016632731971	-13.397653531141827
182.0	-6.083663988636986	-13.129915528716925
182.0	-2.6646037983971307	-11.236379771458207
182.0	12.05179655002015	10.355625100190467
182.0	10.116575337149017	13.80814701426931
183.0	3.6048723914700607	-4.281346735556892
183.0	6.20466342448918	-1.1920025889437065
183.0	4.784807382973099	1.844544697470579
183.0	-7.898255857024102	3.3760143333015593
183.0	-6.696087341908252	0.2527902937284433
184.0	0.6733814267391482	-0.13861715970740393
184.0	0.059525645933444844	0.6085875226226839
184.0	-0.7329070726726361	-0.4699703629152758
185.0	3.000006221755951	1.3484318628932723
185.0	-1.145942793526621	2.281418599328456
185.0	-2.8890299160405193	-1.5834773955107202
185.0	-2.184228166891869	-2.449960050223911
185.0	3.219194654703116	0.4035869835128565
186.0	-4.467838577105563	1.9829993908967125
186.0	-2.498186111227361	-3.8224967701863375
186.0	3.7187980704915184	-3.044942665447845
186.0	3.8522097517648883	-2.9158523395589815
186.0	4.014685413260356	-2.322576784126188
186.0	-0.26761401668585555	7.807106505048881
186.0	-4.352054530497964	2.3157626633738198
187.0	-1.5706839195053484	-1.5670194168612954
187.0	6.4410327176407804	-4.897047764990336
187.0	-1.6130376883249182	5.2094405347295645
187.0	-3.257311109810513	1.2546266471220668
188.0	1.8504950397982969	-2.533871010821264
188.0	4.380736564139665	0.5355906352360388
188.0	-3.103987338882015	1.754332840735495
188.0	-3.127244265055945	0.24394753484974416
189.0	3.769157210773322	2.3649611941762396
189.0	-4.815531489236262	-2.1035250067349054
189.0	-5.154442008049062	-3.2316407153387283
189.0	6.200816286512009	2.970204527897375
190.0	-0.8512052018311372	-2.5272595547489902
190.0	2.9755428313835375	-1.3283748716831716
190.0	-2.1243376295523992	3.8556344264321516
191.0	2.689412345403793	-4.845075505398203
191.0	0.42632738496681827	5.612841552482403
191.0	-0.045345335330103584	5.63935584192891
191.0	-3.525583331491066	-1.4436129816451024
191.0	0.45518893645055797	-4.9635089073680225
192.0	3.779322703911929	2.5893778582441183
192.0	3.5479207949936016	2.944427260222391
192.0	-4.81892566345073	-3.259141643061795
192.0	-2.508317835454812	-2.274663475404703
193.0	1.1114784146492465	-2.4122058418068644
193.0	1.5054396398503178	-1.2620661073950517
193.0	1.0935376540456716	6.9588801292423375
193.0	-3.710455708545236	-3.284608180040421
194.0	0.04060804302612725	0.12856305850478433
194.0	-0.17030962994012502	-0.03933234081675717
194.0	0.1297015869139884	-0.0892307176880165
195.0	-0.03376326964379669	-0.8959517740182829
195.0	0.28181137294494535	0.10816153944991573
195.0	0.1972565146232653	0.21532766398660896
195.0	-0.4453046179244172	0.5724625705817594
196.0	-0.3269275194996674	-1.553553413198779
196.0	1.213203024875755	-0.3974380291428957
196.0	-0.8862755053760815	1.9509914423416668
197.0	0.21231831350546432	0.6083343592175545
197.0	-0.43369071341387094	-0.5123123262672289
197.0	-0.25882877553854566	-0.7244651779153274
197.0	0.48020117544695223	0.6284431449650018
198.0	-0.10603785765916683	0.7588940424795982
198.0	-0.7789393453751623	-0.48291283490498205
198.0	0.8849772030343225	-0.2759812075746287
199.0	-0.4780069787798688	-1.174565906115453
199.0	0.022063099401345657	-2.0417999039523784
199.0	2.070213734090812	-2.859702241216957
199.0	-1.6142698547122853	6.076068051284794
200.0	1.4619461690217532	0.4937909629322367
200.0	1.5760184828197044	0.8890719128209803
200.0	-1.8202805295843643	0.019337904138569954
200.0	-1.2176841222570964	-1.4022007798917933
201.0	-1.1176470660920743	2.8718215690326914
201.0	-0.311386859263695	-3.4523261258545874
201.0	2.5092600622456147	-2.3078171701778887
201.0	-1.0802261368898296	2.888321726999785
202.0	-0.8724508928394794	1.8950073373382206
202.0	0.802418140940418	-1.8894542172974722
202.0	0.8236081560468888	-1.887434278425593
202.0	-0.7535754041478295	1.881881158384813
203.0	0.32911883781839285	0.6647722448673369
203.0	0.1034341493140383	0.565950895024414
203.0	-1.073190222003099	-1.3569232472420243
203.0	0.6406372348706723	0.12620010735028883
204.0	-0.9733084497636343	-1.9047359887508797
204.0	4.310104627471224	-0.428851288299788
204.0	3.081576701680562	0.6264730160692797
204.0	-3.2088621236210084	0.855564885465534
204.0	-3.2095107557671434	0.851549375515854
205.0	6.775605468361275	-3.8784921750103063
205.0	-4.259965891891284	6.269872078038643
205.0	-2.5156395764699706	-2.3913799030283167
206.0	-0.7805325853639629	-1.4880594882083589
206.0	0.3581215032686231	-2.614133308480366
206.0	0.8302267711176683	1.0793882312378846
206.0	-0.40781568902232995	3.022804565450841
207.0	4.190176685853318	0.5369819174860871
207.0	4.672109775395405	1.3594696384735863
207.0	-2.5877355514156806	2.2749602154643886
207.0	-3.9646959512722457	0.2788723791905599
207.0	-2.040933423661864	-2.1774020998738526
207.0	-0.26892153489894066	-2.2728820507407743
208.0	0.21615572870568495	1.9944179575301042
208.0	-0.7660673730953038	-1.4564263724869422
208.0	0.5499116443896314	-0.5379915850431718
209.0	0.12767881439032133	5.994562970662995
209.0	-1.8669333982047356	-9.247415426478577
209.0	-1.4608679381159462	-10.065341809589162
209.0	2.383881939968271	6.387292017041184
209.0	0.8162405819620685	6.930902248363538
210.0	-3.3260354020034026	0.4243038953264528
210.0	1.3127247000965505	-2.156948819155427
210.0	1.9348206200811338	0.37528935412697506
210.0	0.07849008182571686	1.3573555697019695
211.0	-0.9310858271958091	-4.177963045966884
211.0	2.771549608871793	0.9460481170199745
211.0	-1.840463781675969	3.2319149289469027
212.0	-0.024997800944534156	-0.014139864433575948
212.0	-0.003917189423765934	-0.024830427446730908
212.0	0.02891499036831406	0.03897029188030946
213.0	2.3513954338046115	1.2353560985972054
213.0	0.0531259967691374	1.412310237141746
213.0	-1.5106983728965977	-1.002263130957708
213.0	-0.8938230576771579	-1.6454032047812461
214.0	3.100290720425554	-2.220865430603973
214.0	-1.5169284006760086	1.1539604268581651
214.0	-1.5833623197495597	1.0669050037458072
215.0	-0.2699658726514542	0.18082144814461187
215.0	-0.27074530358834364	-0.3215173966402164
215.0	-0.02462949568556976	-0.27917007728910487
215.0	0.565340671925325	0.41986602578471116
216.0	-0.5997553049944797	-0.6621255555397965
216.0	0.6008387421437629	0.039449797460193406
216.0	0.34771035346258533	0.32909353986988676
216.0	-0.3487937906118789	0.2935822182097059
217.0	3.298819781776413	-1.4509730846230358
217.0	1.1519937990644669	1.182165495890335
217.0	-2.8393626021160276	3.9432754727036983
217.0	-3.013668721233434	3.6735401037524205
217.0	-2.0785882295131803	-4.706209406946152
217.0	3.4808059720217863	-2.641798580777281
218.0	-0.42646574218519345	-0.10910058481088683
218.0	0.49200253522457804	-0.00972201835947596
218.0	0.3579119221547605	0.22486377396287535
218.0	-0.42344871519413746	-0.10604117079251031
219.0	0.6322559625658146	4.430753620957519
219.0	-4.7357802836262115	2.0333908086529937
219.0	-4.800340450217644	1.307261101703528
219.0	3.239159064141737	-4.978490024700977
219.0	5.664705707136293	-2.7929155066130407
220.0	1.4920120701329747	-0.8904605946467286
220.0	1.930182901658441	0.5495948409781893
220.0	-1.645894021975576	0.2672183477570615
220.0	-1.776300949815827	0.07364740591150683
221.0	2.1369284432565916	-2.542192067488093
221.0	2.1004548818634245	1.7349677189462618
221.0	-2.4880419414397834	1.3313979144943884
221.0	-1.749341383680246	-0.5241735659525503
222.0	1.5266494306191292	-0.11578891749897685
222.0	-2.6820032052523675	1.8578064024377547
222.0	1.1553537746332456	-1.7420174849387942
223.0	0.04568640841638241	-0.3452659414817471
223.0	0.047689694953007684	0.015271165106996545
223.0	-0.09337610336938955	0.32999477637474933
224.0	0.29404353825423907	-3.2860861869087485
224.0	1.8403568337892937	4.9005261528075055
224.0	-0.3963069966865718	4.227834311713795
224.0	-1.4245097105891613	-1.9381822648137579
224.0	-0.31358366476780936	-3.9040920127988055
225.0	-0.36362769442834364	0.18076217978392284
225.0	-0.18785746420248162	-0.6968051808441276
225.0	0.551485158630822	0.516043001060191
226.0	3.647203897033911	-0.46474021598053417
226.0	3.7506591411399848	3.9267375109326923
226.0	2.487255223850743	6.011848587417333
226.0	-6.605678981123645	-4.017528299723764
226.0	-6.627628193647811	-4.340438928246857
226.0	3.348188912746817	-1.1158786543988704
227.0	0.28147644084044016	-0.1687948770916466
227.0	0.2079477587549478	0.5005883904922811
227.0	-0.4894241995953905	-0.3317935134006146
228.0	-2.1228330716462165	0.4418304746060364
228.0	-5.74328180745673	-2.302855938737904
228.0	2.464428079095553	-0.6066493377406195
228.0	4.220465928836108	0.7885694397578262
228.0	1.181220871171281	1.679105362114676
229.0	3.7030331664839466	0.49875888107482164
229.0	-1.2628572237635307	7.161997733530088
229.0	-2.440175942720406	-7.66075661460492
230.0	-0.31167592352057666	-0.4651926474034873
230.0	0.3494891531037393	-0.9139536733684682
230.0	0.49404110518077515	-0.8389980158805311
230.0	-0.22978447388401088	1.0628896411386668
230.0	-0.3020698608799422	1.1552546955138348
231.0	-2.350677890085282	5.977512831975296
231.0	-4.587707141726489	-4.92603602537019
231.0	1.8127307452679904	-1.8029863220595626
231.0	2.1863305456679263	-1.4181847374620526
231.0	2.939323740875841	2.1696942529165346
232.0	5.009011019957883	-1.0580294039857494
232.0	4.634902194840122	3.531996540820954
232.0	-2.047583459027201	3.5105224617241673
232.0	-7.596329755770807	-5.98448959855938
233.0	2.5929351102366787	-0.9570475025962533
233.0	2.5628658037174556	-0.43443238538682083
233.0	-1.9220057061437532	1.5881154968986313
233.0	-3.233795207810383	-0.19663560891553722
234.0	-0.854573694127394	4.137161180926902
234.0	-1.7097505012764311	-0.5435946532199998
234.0	-0.12425792991848371	-3.751841704314982
234.0	0.5160499798842063	-3.9523440311432645
234.0	2.1725321454380744	4.110619207751337
235.0	9.098916248263336	-8.122999356459871
235.0	14.366295770186966	-0.8163363071788863
235.0	12.597183962189778	2.8128050058506977
235.0	-17.339451021618068	9.128635133227935
235.0	-21.061359224899636	7.01475978135498
235.0	2.338414265877645	-10.016864256794863
236.0	3.0639204155562725	-6.814601917192668
236.0	6.231901378052446	-8.678687326289099
236.0	-3.707227289258397	7.532853503161044
236.0	-5.588594504350326	7.96043574032072
237.0	-1.342517185010901	-1.5132496825337636
237.0	1.954602518048132	0.2662617210735529
237.0	-0.6120853330372277	1.246987961460217
238.0	-0.09156258970114073	1.3943383755621397
238.0	-0.6214286999291659	-0.6277644042928012
238.0	-0.024211149681504854	-0.6358008120176994
238.0	0.7372024393118216	-0.13077315925162653
239.0	0.22452082917740254	1.3739258771693106
239.0	-1.5916546499754203	-0.8363438879256035
239.0	0.6560674930397206	-2.1203866498408224
239.0	0.7110663277582827	1.582804660597094
240.0	-1.099768155566532	-1.5694821738892744
240.0	1.3453779301130262	1.2302085960697837
240.0	1.0010652325866953	1.857506619654325
240.0	-1.2466750071332044	-1.5182330418348404
241.0	0.15350101064922564	0.12200988652518582
241.0	-0.06852583009094736	0.0007927933323195615
241.0	-0.08497518055829574	-0.12280267985751536
242.0	-1.3963481109268396	-1.736252512563872
242.0	1.0883691759500884	-0.3073826036584956
242.0	0.30797893497675116	2.0436351162223674
243.0	7.246973296712957	-7.816382086931406
243.0	9.493483620485051	2.2744601741147776
243.0	5.566961888949515	8.280242635993538
243.0	-5.2686457247643945	9.008181250854888
243.0	-13.375334051964638	-1.6883973640021614
243.0	-3.663439029418513	-10.058104610029671
244.0	0.4654854763877116	0.45695187588437586
244.0	-0.18651018086711713	0.2454450079413193
244.0	-0.2789752955205815	-0.702396883825686
245.0	5.724179640967562	3.42287566336776
245.0	0.9481318138660579	10.257238293409857
245.0	-4.073319227924229	2.9772915324513742
245.0	-3.8362349587178004	-6.681988406998755
245.0	1.2372427318084482	-9.975417082230255
246.0	-0.4025719037203326	-1.2288301453413117
246.0	0.8820877081221867	-1.3348720262999134
246.0	-0.47951580440183894	2.5637021716412365
247.0	-2.2056034438271985	-2.1334996990858843
247.0	-2.018268957064537	-2.331934299873604
247.0	2.0451613566289484	0.5754101290445635
247.0	1.2506755852324822	1.933636409649534
247.0	0.9280354590302988	1.956387460265349
248.0	-10.248338404078838	1.5598183193633752
248.0	5.132882794930423	-9.16445715513008
248.0	5.182559866937235	-6.672873224408287
248.0	4.005220702190063	0.6730082946320403
248.0	-0.8019311407330403	5.942444208654752
248.0	-3.27039381924585	7.662059556888205
249.0	-0.3969849981195036	0.7757718203803792
249.0	-0.9864714955328764	0.5691440649204125
249.0	-1.0811843871429525	-0.7159114092541654
249.0	2.4646408807953417	-0.6290044760466312
250.0	2.1396297339514243	1.9146325037314795
250.0	0.48199119647935385	4.170726460860179
250.0	-3.6906478331533035	-0.5706356367214249
250.0	-1.2882443013971967	-3.8741018733329695
250.0	2.3572712041197152	-1.640621454537248
251.0	0.10639377556857861	-0.2258909025741478
251.0	0.12844141488897545	0.243055899682216
251.0	-0.23659478434419395	0.16010282882314883
251.0	0.0017595938866114677	-0.17726782593121684
252.0	-0.026176901381434286	-0.00863383990047565
252.0	0.039924829054447906	-0.0193589305463917
252.0	-0.013747927673015364	0.027992770446883142
253.0	3.4933362087858617	-4.720555502306044
253.0	3.722746930844944	-0.5742885527047524
253.0	-3.7295455829966913	8.466978607649025
253.0	-4.334584716640486	4.81999410398616
253.0	0.848047160006383	-7.9921286566243905
254.0	-0.21328245384321928	3.5033253101833663
254.0	-3.9934969756652046	2.1507812356788203
254.0	-3.351072935916957	-0.5230130288357244
254.0	2.1410138885990913	-3.342853609761788
254.0	5.416838476826302	-1.7882399072646828
255.0	0.609780811661083	0.07744754009056633
255.0	-0.456197636972383	0.08974139855197892
255.0	-0.46496135760488205	0.04064837130886357
255.0	0.311378182916182	-0.20783730995140884
256.0	-1.6149000731441014	-1.296167649248058
256.0	1.3688358242746823	-1.248058157896781
256.0	0.6528799865102404	1.9331832304788652
256.0	-0.4068157376408177	0.6110425766659738
257.0	0.6261837066054239	1.859625582584904
257.0	-0.6088805652904946	-0.78373788094185
257.0	-0.017303141314929	-1.0758877016430612
258.0	0.9816209564198766	0.4776707094643828
258.0	-1.6100660633683401	0.9627390875684724
258.0	0.6284451069484642	-1.4404097970328535
259.0	5.844651478587908	1.4431123186720578
259.0	0.27864254984197606	6.626160518484132
259.0	-4.607262710961314	-2.893957859464216
259.0	-1.5160313174685534	-5.175314977691949
260.0	-3.671150833395766	0.09009606798657767
260.0	-4.127964497208364	-1.44907095072762
260.0	2.7050222354289604	-1.1590029790038876
260.0	2.7624400502537396	-0.8014811852978655
260.0	2.33165304492141	3.3194590470428427
261.0	2.584096092445013	-4.133646480627595
261.0	-2.291203784251234	4.078877825096315
261.0	-2.3500492149720573	3.915947413631061
261.0	2.057156906778252	-3.8611787580997685
262.0	-5.443783820080799	1.795212646341936
262.0	-6.278136025282318	-5.133177496381672
262.0	-3.5085118259999795	-4.478113106269655
262.0	8.265578571642417	0.3137187297335939
262.0	10.316595717607752	1.9641891466487678
262.0	-3.35174261788705	5.538170079927025
263.0	-5.927443242841443	4.555965322833592
263.0	0.7862283723777781	-6.357151027527884
263.0	6.569082887107115	-2.2799166147486325
263.0	-1.4278680166434627	4.081102319442917
264.0	0.39048510307241713	0.20495429309292967
264.0	-0.4038383277882759	0.23389788107485077
264.0	0.013353224715852569	-0.43885217416777544
265.0	0.22238861649416225	-0.9334329681060798
265.0	0.5494078595981738	-0.8398736966892146
265.0	-0.0765406078369416	0.8069163311706611
265.0	-0.38283598305171357	0.9116677706001095
265.0	-0.31241988520367714	0.05472256302452979
266.0	6.6961743266647265	-8.236307960637022
266.0	10.45831042609935	-0.07114682517163759
266.0	-0.7854585414400064	5.111594540180911
266.0	-7.235622879567885	4.139689788274829
266.0	-9.133403331756238	-0.9438295426470554
267.0	-0.2640540411389857	0.45983630934737035
267.0	0.047701503912527844	-1.111984423843775
267.0	0.21635253722645256	0.6521481144963917
268.0	2.328331020001102	-4.263510410933844
268.0	0.549126458245317	7.978248648836623
268.0	-2.877457478246419	-3.7147382379027793
269.0	3.8736840959989647	-0.0324168633700969
269.0	-1.032057759085144	0.9301933072219503
269.0	-2.2932138436006646	0.2679692231075509
269.0	-2.330280619405646	0.16438636718867358
269.0	1.7818681260924554	-1.3301320341481235
270.0	1.3752596044889691	0.48284268384476653
270.0	-0.8296928998284948	1.4808688566440684
270.0	-0.7430019724348284	-0.12133348857875571
270.0	0.024117815958592446	-0.9641511085571317
270.0	0.17331745181573338	-0.8782269433529445
271.0	1.3234588133562528	-3.563004752570871
271.0	1.935509678195086	-4.0628488219973935
271.0	3.1748615868147754	-0.6442845611170838
271.0	-3.174382745389171	4.759096251067993
271.0	-3.2594473329768867	3.511041884617348
272.0	0.4382889464921889	-4.749208242705257
272.0	2.1484121894860935	5.191319960336689
272.0	-2.704063072586882	4.678415926972587
272.0	0.11736193660858976	-5.12052764460403
273.0	2.1245092183267937	-1.11673710650095
273.0	-2.0473193545637876	2.8155755651120056
273.0	-0.07718986376300922	-1.698838458611054
274.0	-0.5416403637275548	-2.97966978002414
274.0	6.597152969255447	7.549445258512681
274.0	-6.055512605527893	-4.569775478488545
275.0	13.451050330533173	-6.218673960450344
275.0	3.787923631378533	2.0840880781121305
275.0	-11.200692666374469	5.14145028733592
275.0	-10.832608375487586	4.581017774124191
275.0	4.794327079950359	-5.587882179121899
276.0	5.569490396162862	0.5085127692738012
276.0	-2.1490495464081896	2.5101401921490196
276.0	-3.420440849754665	-3.01865296142282
277.0	0.24149532760930373	1.1532443073478302
277.0	-0.5812874824819654	-0.2564081661103923
277.0	0.33979215487267334	-0.896836141237446
278.0	-0.09112814190919961	0.061675064837954735
278.0	0.033526911003347495	-0.0528513597197235
278.0	0.05760123090585664	-0.008823705118216016
279.0	3.8048046961895823	2.324329922612542
279.0	-3.3389475278917002	-0.8258048879143242
279.0	-2.9508562607428632	-1.5108275438429133
279.0	-1.297336156709802	-2.195811926256241
279.0	3.7823352491548135	2.208114435400956
280.0	-0.6360712591712023	-1.956994627103927
280.0	0.9842468049318253	-2.8737018699192634
280.0	1.890223589911914	-1.8144052441233833
280.0	1.3789324764164754	4.67516573004399
280.0	-3.617331612089011	1.969936011102605
281.0	-0.8009343848599467	-0.6866755480930576
281.0	1.3597953146099855	-1.2506401558583553
281.0	-0.5588609297500376	1.9373157039514275
282.0	1.0366811351790646	-3.164351793533956
282.0	3.308547654583682	1.7584427753373124
282.0	0.1307059701068047	1.5195336337770544
282.0	-4.475934759869576	-0.11362461558039687
283.0	1.9149821042672477	0.4795145259457201
283.0	-0.27158635717302176	2.0699155270155805
283.0	-0.8051725920857357	2.0827674167864347
283.0	-1.6686975372534636	-1.8819250294291086
283.0	0.8304743822449712	-2.7502724403186467
284.0	-0.06980084615813174	-1.2086657635338678
284.0	0.6691165473239646	0.45051136867273367
284.0	-0.09022311623858786	0.8724583560126923
284.0	-0.5090925849272181	-0.11430396115158134
285.0	-0.0010110852835165582	-0.0011099185510591142
285.0	0.0015103644088321055	0.0001764572435264881
285.0	-0.0004992791253163771	0.0009334613075255694
286.0	-0.8542144025859171	-1.4576876436654136
286.0	1.128878735266536	-0.25797705672153287
286.0	-0.27466433268059454	1.7156647003869616
287.0	0.15367095701496855	-1.9660004792559245
287.0	3.1453406928572094	-1.9749085567658595
287.0	-3.299011649872169	3.940909036021789
288.0	-0.3110954639737717	-1.6448179535479184
288.0	1.886392932235903	2.6824061939457815
288.0	-1.5752974682621237	-1.037588240397882
289.0	2.315302926560379	1.704795801168833
289.0	-2.323710899641324	0.5351167825083324
289.0	-2.6393544244362004	0.36071914724859033
289.0	-0.9324535338104514	-3.278050612248106
289.0	3.5802159313276816	0.6774188813223422
290.0	0.7511942221561121	-0.002285105050857801
290.0	-1.2248553440704022	0.5555291178947108
290.0	0.47366112191427545	-0.5532440128438544
291.0	2.5782540262279077	1.2660269146017942
291.0	0.0324455940333528	2.553808149208291
291.0	-1.3242343519819717	-1.899645049224014
291.0	-1.286465268279296	-1.92019001458609
292.0	0.9379560279083776	1.4579704100072735
292.0	-0.5944571540332816	-0.6169289443546044
292.0	-0.34349887387511024	-0.8410414656526762
293.0	-0.5863551434239208	1.8022013098161256
293.0	0.08412135205668998	-1.5128596592363779
293.0	0.502233791367187	-0.2893416505797577
294.0	-0.0699711839207833	-0.04458647129328249
294.0	0.05742125546431034	0.00873748982620861
294.0	0.012549928456469588	0.03584898146708108
295.0	-2.73013762398554	0.667417927897814
295.0	-1.2529204448899547	-0.9522146002226408
295.0	2.949570245333678	-1.816082097443975
295.0	3.506876723326379	0.7695322518209216
295.0	-2.4733888997845312	1.3313465179479105
296.0	-3.236959639604066	-2.9377105019055096
296.0	3.7879646364650044	-0.031718484084747624
296.0	0.8695176028514978	2.6447597508337237
296.0	-1.4205225997124493	0.32466923515652685
297.0	3.5675531762511135	-7.860000244628142
297.0	1.8991276559665542	5.53344164937771
297.0	-1.4022404780299682	7.059519323654638
297.0	-7.157938904011805	3.470256039413446
297.0	3.093498549824123	-8.203216767817707
298.0	1.386465353621532	1.955363344281681
298.0	0.6543014100437387	2.360751377757484
298.0	-6.2325642194622075	-0.8822269076279078
298.0	4.191797455796938	-3.4338878144112566
299.0	2.5797904147451405	1.0593133388185196
299.0	-0.5338751716533312	1.840349486484449
299.0	-2.045915243091809	-2.8996628253029684
300.0	1.1913641196937472	-0.6905803115873997
300.0	-0.6601990960773879	0.804646601081724
300.0	-0.5311650236163642	-0.11406628949432947
301.0	0.7771074942506728	-1.3635601575343401
301.0	-0.40440752608241265	1.4868676809971242
301.0	-0.7453353489286383	1.370064815981027
301.0	0.3726353807603819	-1.493372339443805
302.0	-2.1237410124238103	-0.3524875421423658
302.0	1.5500585717399629	-2.2063009455151326
302.0	0.9341446709063297	1.1674730862081355
302.0	-0.3604622302224815	1.3913154014493427
303.0	8.085330731830197	-3.0884977677276275
303.0	-1.7229039903480403	3.7146777076776565
303.0	-4.042874741673817	2.5626424624164263
303.0	-2.319551999808314	-3.1888224023664558
304.0	-2.9626596883781406	2.0488307877863328
304.0	-2.886863310674663	-6.376216975635063
304.0	5.84952299905281	4.327386187848761
305.0	-4.677286251029455	1.3982366183992876
305.0	-3.6633332334035984	-0.12358400190428
305.0	1.137577505050189	-3.261280871202824
305.0	2.8728833925873465	-2.457978715821326
305.0	2.967670612623184	1.0061025064720648
305.0	1.3624879741723417	3.438504464057134
306.0	2.255001433956489	2.710425579798373
306.0	-3.7468403734381073	1.198636665544657
306.0	-4.820181264533913	-1.1414357744761885
306.0	6.312020204015579	-2.76762647086684
307.0	0.835706543551499	-0.8752450398973087
307.0	0.37392216773325077	1.1633591856774619
307.0	-0.5973209905930864	-0.0028596339417139645
307.0	-0.6123077206916456	-0.2852545118384489
308.0	-1.250046030082546	0.8906114861096475
308.0	-1.4008631697412761	-1.4128772705560022
308.0	1.6851963523987825	-1.4229288809505878
308.0	1.8619850186145865	0.608258455495837
308.0	-0.8962721711896031	1.336936209901074
309.0	1.361030416357004	-1.187800147573638
309.0	-1.0340399085045926	1.2687328564251883
309.0	-1.4426412384438496	1.2190930240131965
309.0	1.1156507305913939	-1.300025732864754
310.0	-1.661558123427471	-1.1926295886189573
310.0	1.937637310082801	-0.1288805213532657
310.0	2.809084101843485	1.5959650404272359
310.0	-3.0851632884988183	-0.2744549304550054
311.0	5.453746304825043	3.6338737983174987
311.0	-0.5015187128669267	2.4349316351702375
311.0	-3.62594139619641	-3.0049191567566256
311.0	-1.3262861957617142	-3.0638862767311066
312.0	6.80748695730614	3.7765923053437875
312.0	0.02671297497595413	7.0727778238140555
312.0	-5.507649631604106	-0.9627272874436018
312.0	-1.880714429734323	-5.379353876249544
312.0	0.5541641290563407	-4.507288965464701
313.0	3.2751278208631946	2.107412593362613
313.0	0.14716295997428439	3.0408209620047097
313.0	-2.108055257638523	-1.9003969234193858
313.0	-1.314235523198974	-3.247836631947945
314.0	1.4394603965252475	0.6088590248964393
314.0	0.8989550698802994	1.4023840449237728
314.0	-1.6376875922330194	0.31926127732629267
314.0	-1.3515813688752691	-1.2033797181843542
314.0	0.650853494702743	-1.1271246289621606
315.0	0.2792908267913107	0.2876030756767115
315.0	-0.2204346279485736	1.1130944718022966
315.0	-0.36021999568951185	-0.396872660860568
315.0	0.30136379684680376	-1.003824886618427
316.0	-2.8162787035824492	9.377930725713442
316.0	-2.426497230826991	-1.9562209454124462
316.0	5.242775934409446	-7.421709780301002
317.0	-0.6975782906479023	0.5511961773393972
317.0	-0.45017300016504963	-1.8670970536488074
317.0	1.147751290812952	1.3159008763094102
318.0	-0.22945775448719685	0.4958404294927067
318.0	-0.5699065377418673	-0.6634066311054091
318.0	0.7993642922290211	0.16756620161268976
319.0	2.766241273398108	-0.455076655528014
319.0	-0.6705512595711236	3.010651109676534
319.0	-3.18954195012659	-0.17077606382426225
319.0	1.0938519362996	-2.384798390324266
320.0	-0.09510661589408602	-0.24641644015067465
320.0	-0.06396896240727146	-0.31611807451001844
320.0	0.2741129176748988	-0.2030812244125521
320.0	-0.11503733937354084	0.7656157390732197
321.0	0.5767336517437256	-1.5434610366580592
321.0	0.047273120974672	0.9503388737664182
321.0	-0.21050388702879302	1.3165734448090425
321.0	-0.4135028856896084	-0.7234512819173945
322.0	-3.1863290410114855	-4.63678318706954
322.0	0.6481986271565651	-2.7853973951448547
322.0	3.607127068692517	1.4113634843267293
322.0	-1.0689966548376015	6.010817097887671
323.0	-1.4055017965910659	3.4457552500302606
323.0	-5.536688927032127	3.339815441582961
323.0	-5.720653638046019	2.8944174795787974
323.0	3.5975561577858874	-6.173652701361908
323.0	5.424244550920995	-5.440977733468362
323.0	3.641043652962314	1.9346422636382228
324.0	-2.8403079641787534	-1.3498955120061418
324.0	2.260566190232968	-4.522287245730431
324.0	3.0032729475002724	1.1598026009462963
324.0	0.342871531471641	2.5555049635747333
324.0	-2.7664027050260778	2.1568751932155474
325.0	-0.5097042307024201	0.10773020925603256
325.0	0.5427994132679101	-0.37133426131747954
325.0	-0.033095182565496005	0.2636040520614322
326.0	-1.3377002000764862	0.9181817881835347
326.0	-1.951607759300887	-0.9665833835242261
326.0	1.7875791656265652	-2.9210662072245497
326.0	1.5017287937508197	2.9694678025652146
327.0	0.33478375713338854	1.277550008360463
327.0	-1.869295116909048	-0.9467922212946468
327.0	1.5345113597756386	-0.3307577870658077
328.0	2.0274199186052537	-3.3955509903889105
328.0	-0.34737944474063837	3.5060732403436945
328.0	-0.5811357011418572	3.3235085730869725
328.0	-1.0989047727227614	-3.434030823041757
329.0	-1.585230515123755	0.8382461107261263
329.0	0.33120513646492983	-2.144880003830265
329.0	1.2540253786588251	1.3066338931041388
330.0	0.9916009552357845	1.1073258343813652
330.0	-0.711556280462994	0.46184476711657374
330.0	-1.5848013804203762	-1.5593929849961865
330.0	1.3047567056475857	-0.009777616501752458
331.0	-2.618635469434655	-1.0687680863171263
331.0	3.7476808017944236	0.2788909756210051
331.0	1.6533508558988719	1.6379551722474932
331.0	-2.7823961882586477	-0.8480780615513678
332.0	0.5408500003974702	-0.5931561778887476
332.0	0.7468574360761714	-0.23069300647780824
332.0	-0.4399507805377087	1.1710329123299905
332.0	-0.8477566559359025	-0.3471837279634038
333.0	-1.679243101337037	0.1445267459122632
333.0	3.3424006429147703	-3.4541043213637534
333.0	-1.6631575415777333	3.30957757545149
334.0	-1.705959175882788	-4.04013770875151
334.0	3.47822499449785	-2.721531252480452
334.0	2.1817769658485653	0.8412413745847982
334.0	-0.6953116659987857	4.499937766570359
334.0	-3.2587311184648335	1.4204898200768177
335.0	0.6062624537205649	0.012053133555022801
335.0	0.06285954287493258	0.8092347432300232
335.0	-0.6691219965954549	-0.8212878767850493
336.0	0.9303996341546096	-3.747383220376588
336.0	2.179612967427176	-0.39530872229731684
336.0	-3.1100126015817935	4.142691942673917
337.0	-0.572004117462582	-4.202362010241703
337.0	4.061169726318749	3.5123018574788194
337.0	-3.4891656088561454	0.6900601527629032
338.0	5.5818202356174655	1.6157929527786512
338.0	-10.709940135521656	5.073028698675494
338.0	0.8020296403610095	-3.1030927100188723
338.0	4.326090259543202	-3.5857289414352707
339.0	-2.0771886246763875	1.8123665227418624
339.0	-1.3659873700589547	-1.84930991542499
339.0	3.4431759947353413	0.036943392683142846
340.0	0.3091272476012963	1.9323860595291722
340.0	-0.3586467273724534	-0.8294689972330558
340.0	0.0495194797711907	-1.1029170622961426
341.0	-2.6627942893350136	-1.4375547901788204
341.0	3.432895285952394	-0.887055646678761
341.0	2.732394329007221	0.3106362101592207
341.0	-3.5024953256246185	2.0139742266983554
342.0	-0.3807179258699766	-0.7638449641458065
342.0	0.48541418294532374	-0.2168319281692051
342.0	-0.10469625707533674	0.9806768923149995
343.0	-0.8558491151408444	0.7198811019252759
343.0	-0.763054806301664	-0.7258338636001707
343.0	1.6189039214425092	0.005952761674887779
344.0	0.03942173772011943	-1.559753131906689
344.0	0.10504509508421109	0.875970985064261
344.0	-0.14446683280433537	0.6837821468424291
345.0	-0.8523760093254632	0.7125379441810472
345.0	-0.1763258745891405	-1.40371919394787
345.0	1.450714468725353	-0.4760614387228257
345.0	-0.4220125848107217	1.1672426884896547
346.0	-1.9537781277402535	1.4160833023375132
346.0	0.7445261253244182	-3.071289325590996
346.0	1.2092520024158193	1.6552060232534556
347.0	-0.3594826151502671	-0.33310525375112343
347.0	0.41968294257194816	0.1739721743479589
347.0	-0.06020032742169582	0.15913307940315088
348.0	-0.41589718876698745	-1.42663630571033
348.0	0.5551836707232934	0.69447467170223
348.0	-0.13928648195631596	0.7321616340080992
349.0	0.3960914273619254	1.5182673932639619
349.0	-0.6217471373614799	0.570378003643935
349.0	0.22565570999955645	-2.0886453969079395
350.0	0.7999327530872476	-1.2944295572148894
350.0	0.2943115844223532	1.9193031765553485
350.0	-0.6981668174530961	1.8662101244857299
350.0	-0.348538601105555	-0.6966107628875171
350.0	-0.04753891895096965	-1.7944729809386615
351.0	13.355536970158381	6.679420834775741
351.0	-10.065245817827861	-3.137484000926094
351.0	-10.766044806121348	-4.459906719928939
351.0	7.4757536537908225	0.917969886079291
352.0	6.194495149979124	1.0912566634366254
352.0	-3.8910453846058766	3.351258671343018
352.0	-2.303449765373244	-4.44251533477965
353.0	0.10698380398553058	0.05871963280503018
353.0	-0.23277270386624527	-0.03216730101007961
353.0	0.1257888998806671	-0.026552331794953202
354.0	2.8641780108930024	-1.4234958776799254
354.0	1.6105011594326724	4.16458166283726
354.0	0.49492276084446274	3.9830128687991464
354.0	-4.082587597662702	-1.9254194200191002
354.0	-3.989703869460468	-2.198680287074696
354.0	3.10268953595303	-2.5999989468626445
355.0	-0.14437514599006565	3.3415457270425355
355.0	-0.7161684917322634	3.559032946046677
355.0	-4.152954058023712	-0.46632962110175286
355.0	1.8049047770105366	-3.840098133971629
355.0	3.2085929187354827	-2.5941509180158167
356.0	1.7805141539627025	-4.57697004811365
356.0	2.5976080445524006	-0.7622535725720043
356.0	-4.37812219851512	5.339223620685644
357.0	1.727319159596511	3.191867259244978
357.0	-4.760975653917351	-3.4396240937698743
357.0	-4.648511027803721	-3.46865422471819
357.0	5.134192557599068	0.08169416325709304
357.0	2.547974964525485	3.634716895985966
358.0	-0.19900543881460375	0.06681347387477375
358.0	0.1371643979132435	-0.18973377564562224
358.0	0.061841040901350376	0.12292030177083103
359.0	1.0250754935564041	-4.477587387868163
359.0	2.382625902317631	-2.1941681971957676
359.0	-1.0160658641836458	4.277729266084298
359.0	-2.3916355316903894	2.3940263189796327
360.0	-0.1216599090291425	-1.978586510971739
360.0	0.9299802842105871	0.17690060676994293
360.0	-0.10737551490063942	1.9519770603026032
360.0	-0.7009448602808089	-0.15029115610080082
361.0	-0.06235087702061897	-1.0839577833347398
361.0	1.6247323324530005	2.180082758004465
361.0	-1.5623814554324063	-1.0961249746697395
362.0	-4.03097730797351	1.8490373170231205
362.0	1.0831751636513907	-1.1430451011187572
362.0	2.947802144322116	-0.7059922159043647
363.0	2.522763651425336	1.613546024490071
363.0	-0.1041540526394157	2.111337031749976
363.0	-2.4186095987859213	-3.724883056240068
364.0	-0.09268863682812507	-0.20170082522587546
364.0	0.3298709862872365	0.11433006528564539
364.0	-0.237182349459139	0.08737075994023694
365.0	3.018269818971973	6.426086799858312
365.0	-2.9892896590314817	4.051861795740234
365.0	-2.9884355777625324	-3.9085631581448266
365.0	2.959455417822039	-6.569385437453712
366.0	1.1983459539365575	-0.24089622727880794
366.0	0.6854996643270647	1.5888835424605563
366.0	-0.9450678156006611	-0.6733264665941324
366.0	-0.9387778026629544	-0.6746608485876187
367.0	-0.038189332650463835	0.18904504312739057
367.0	-0.06606874828819947	-0.18274063879506347
367.0	0.10425808093867794	-0.0063044043323230575
368.0	-0.006366527300204651	0.03722830971053372
368.0	-0.07647427005804133	-0.05244615865364704
368.0	0.08284079735824598	0.015217848943113316
369.0	-6.31234767516753	-6.399220909995528
369.0	9.601302835404805	2.8628762267262626
369.0	-3.288955160237273	3.53634468326928
370.0	0.6093506295745101	1.6406338539484902
370.0	-4.6345149918175546	-0.8264384298331839
370.0	4.025164362243043	-0.8141954241153047
371.0	-0.7568836627267485	1.5975625882405116
371.0	0.6536951678368229	-2.935133450700402
371.0	0.8297732939712471	-0.2963546242576951
371.0	-0.7265847990813343	1.6339254867175925
372.0	1.5269954421979761	1.632118682949491
372.0	-2.075663917588955	0.7284719925296946
372.0	-0.6748163784896324	-1.1475351915418244
372.0	1.2234848538806202	-1.2130554839373502
373.0	0.8793767243369373	2.9505107512017617
373.0	0.6265575736433013	2.8631084763196086
373.0	-0.7959508626332327	-2.864651537697367
373.0	-0.7099834353469743	-2.948967689824006
374.0	0.9296267575478999	3.858837655827083
374.0	-2.2110670719782433	2.635220053641184
374.0	-0.11703468690582064	-4.175080739814177
374.0	1.3984750013361646	-2.318976969654093
375.0	-0.2167022446993615	2.939932801145915
375.0	-0.4212491819789277	-1.8318671607525883
375.0	0.6379514266782828	-1.1080656403933398
376.0	1.0499413378590583	0.22511374281398766
376.0	-0.5593525727736596	0.4417146383510448
376.0	-0.4905887650854245	-0.6668283811650318
377.0	0.5899358985240885	-4.958931965934184
377.0	3.941728520905151	-1.3415413365381545
377.0	5.309320230682754	2.4727187041746697
377.0	-1.4494885466423049	5.737116469216823
377.0	-4.606199053571861	0.2803383743275157
377.0	-3.7852970498978347	-2.1897002452467156
378.0	-0.21428261948497948	-0.12008837005535304
378.0	0.28483852516834485	0.06010838830959607
378.0	-0.0705559056833689	0.05997998174575674
379.0	0.6197713087403565	-0.3859189140421459
379.0	-0.18995373652065173	0.3844521275053569
379.0	-0.42981757221971667	0.0014667865367727813
380.0	2.017460843109816	1.010204276735715
380.0	-1.5516882119387854	1.672851847466538
380.0	-0.7613988011229483	-0.9302551050235162
380.0	0.295626169951902	-1.7528010191787162
381.0	9.95820701957188	-4.223460613938791
381.0	9.181817408445994	3.270976783768712
381.0	2.939483928216718	3.8423172460652366
381.0	-10.581444265992609	0.3222355654795512
381.0	-11.498064090241973	-3.2120689813747116
382.0	-5.967257957811229	-6.178998277933074
382.0	1.0235155811601473	-1.423862849407059
382.0	3.2559489538394852	0.667842821170714
382.0	1.687793422811612	6.9350183061694075
383.0	0.8610515801592472	-0.6949852109158985
383.0	-1.1147553233495653	1.3876082332002468
383.0	0.25370374319031097	-0.6926230222843478
384.0	1.139626757333837	0.008973359975515129
384.0	-0.6323049860272525	0.9437162800794827
384.0	-0.5073217713065834	-0.9526896400549908
385.0	-3.841867968683598	1.2823884231409357
385.0	0.631957684584326	-1.3735164326615872
385.0	3.209910284099272	0.09112800952065193
386.0	1.9695266419040431	-3.64165720341579
386.0	2.149549381519499	6.189067899608175
386.0	-3.2821221396483193	4.643586619795207
386.0	-0.8369538837752231	-7.1909973159875875
387.0	0.5647129490084895	-0.11551613003459708
387.0	-0.9643744321530149	0.8545563448653494
387.0	0.3996614831445109	-0.739040214830746
388.0	0.5916133663273001	0.5631787059702692
388.0	-0.8216288689704018	0.10900899461449144
388.0	0.23001550264310344	-0.6721877005847449
389.0	-0.02210658215619992	8.516470778754984
389.0	-2.247936742937447	-0.9890016912632784
389.0	-1.5415914936096913	-2.921757490605859
389.0	3.811634818703342	-4.6057115968858335
390.0	-2.9351042430930327	-1.8147155079424793
390.0	5.67971531641833	-1.619845364662482
390.0	1.5200983656364129	2.223639691688722
390.0	0.5945348946961554	2.058109599857571
390.0	-4.8592443336579025	-0.8471884189413312
391.0	-1.0879956695900554	-0.17876419067631336
391.0	-0.07896604483669756	-0.20859506797777017
391.0	0.5152820024468068	-0.0002527172064610989
391.0	0.6516797119799635	0.38761197586053225
392.0	-0.8772287667077723	0.8802989053515639
392.0	0.0030461941867776375	-1.3185508481249621
392.0	1.1110448531509993	-0.9849284674810852
392.0	-0.2368622806300084	1.4231804102544776
393.0	-0.5361990292836789	1.4124594004119368
393.0	-1.2728620033285893	-1.7281672303350775
393.0	-0.6463614505247472	-2.707815707001546
393.0	2.455422483136978	3.023523536924666
394.0	-1.0951719361921677	3.2342068321574766
394.0	-1.8827585703358842	0.4251419702094341
394.0	-2.157620474492748	-5.0074360984633035
394.0	5.135550981020806	1.348087296096414
395.0	3.7684201386025347	1.0433705180360724
395.0	3.704444160326147	1.0906913984737678
395.0	-5.679801612660432	1.7251367164244729
395.0	-4.642325050744798	-1.756277543280929
395.0	2.8492623644765467	-2.102921089653368
396.0	-3.1614465864534367	-0.1144390581227748
396.0	3.186199942104091	-2.633791645818278
396.0	-0.024753355650654375	2.748230703941053
397.0	-0.08604063831456728	0.044942512796744806
397.0	-0.011044067550459141	-0.019455640482414265
397.0	0.09708470586504034	-0.025486872314325972
398.0	-0.10353325115395157	0.38265439961492725
398.0	-0.12543821288377777	0.38347427661549627
398.0	0.2289714640377147	-0.766128676230466
399.0	0.9016493545611844	0.17147411857922004
399.0	0.785285833621492	0.4411035420342239
399.0	-1.0105436767677216	0.8065738431719043
399.0	-0.676391511414947	-1.4191515037853208
400.0	0.7959794914126803	0.4916021539155673
400.0	0.32761080981298724	1.5562407725106326
400.0	-1.123590301225654	-2.047842926426196
401.0	3.3419240459662447	2.617369295806129
401.0	-7.013061707193374	2.5969290694732377
401.0	3.6711376612271414	-5.214298365279338
402.0	-4.5749104066375565	0.970154150321746
402.0	-8.333675031096444	-0.6528348030629839
402.0	-4.95169732452382	-5.524892820230491
402.0	13.69685242818374	1.5553936461044708
402.0	4.163430334074105	3.6521798268672496
403.0	5.3351957978705515	-7.866355524321941
403.0	8.141627576967272	-5.798305239296841
403.0	-0.7082703051908193	2.8431251244060514
403.0	-6.373233476030604	5.427747860103945
403.0	-6.395319593616394	5.393787779108803
404.0	-3.3078356079590887	-1.171984658626224
404.0	-3.033210688279836	-1.3428426599476395
404.0	2.84079192359169	0.5874431495267834
404.0	3.5002543726472237	1.9273841690470834
405.0	-0.057266964428678464	0.047998223494280394
405.0	-0.021672579375005042	-0.042226211303788425
405.0	0.07893954380366956	-0.005772012190487492
406.0	-0.1718376926600492	-2.048572807804886
406.0	2.692112834651312	-0.631523792195271
406.0	-0.3617344330312082	2.558432074634611
406.0	-2.1585407089600546	0.12166452536554613
407.0	0.026688654070420842	-0.22889526496120322
407.0	0.31590905643137085	0.3578558002294295
407.0	-0.34259771050179844	-0.12896053526823367
408.0	-3.9428837532649936	0.045893540806427935
408.0	2.7454659047857835	-2.0684393275027313
408.0	1.1974178484792248	2.022545786696306
409.0	0.9775902362362102	-1.6382336358437277
409.0	0.017342846528402893	3.2291017451779815
409.0	-0.9949330827646097	-1.5908681093342394
410.0	-2.2074062032833215	0.2010153207921735
410.0	2.081359648824464	-3.2178946820913383
410.0	3.079281077261208	0.4682115076690103
410.0	-0.8117845406482522	1.5573375965643854
410.0	-2.14144998215411	0.99133025706574
411.0	-0.35092516926585615	-0.5893368427909709
411.0	0.7422860976994472	0.9234621963646088
411.0	-0.3913609284335922	-0.3341253535736485
412.0	1.1837428270311086	-4.338094520062215
412.0	1.8494643241528406	2.446474449627336
412.0	-3.0332071511839476	1.891620070434886
413.0	0.10294029567404148	-0.4798102755948801
413.0	0.4129724112891282	0.15554589303794394
413.0	-0.5159127069631697	0.3242643825569362
414.0	0.23034086317210986	-2.4806884940673974
414.0	0.5188902436988105	2.5011292368553484
414.0	0.4304326336835253	2.5097956425602534
414.0	-1.179663740554431	-2.5302363853481986
415.0	1.1337624021655515	-0.26458204105056116
415.0	0.9037323709740029	1.2609279910232056
415.0	-0.5623774428022991	1.5970756287894978
415.0	-1.4751173303372753	-2.593421578762122
416.0	6.749129899995417	0.6324519411162421
416.0	6.903698754021755	0.9797126066140035
416.0	5.767489117543936	4.986195277033416
416.0	-10.998642550035644	0.22182313165581852
416.0	-8.421675221525504	-6.82018295641949
417.0	-3.1100345873178314	0.37771801864911414
417.0	-0.599366898853631	-7.560644976495016
417.0	3.7094014861714504	7.1829269578458765
418.0	-8.02238617151305	-4.542700517642543
418.0	4.879597888105759	-17.68103619980427
418.0	2.614761031948985	7.614527756598226
418.0	2.1318715434891855	8.56977482836554
418.0	-1.6038442920308835	6.039434132483045
419.0	-2.392990960923395	-1.6852672026998627
419.0	1.7013847642555986	-2.577647797759274
419.0	5.799103848463648	2.1771338406623837
419.0	-5.107497651795838	2.085781159796753
420.0	0.3645640727079638	-1.1184344825762573
420.0	2.0617209622089976	-0.9494900378109352
420.0	0.45755773104569786	1.1632136164014242
420.0	-2.8838427659626693	0.9047109039857786
421.0	-0.6270213284807997	-0.40305505069678427
421.0	0.8014292305760431	-0.08082000127333194
421.0	-0.17440790209527363	0.4838750519701261
422.0	-0.030828332284000528	1.589087865867467
422.0	-0.6508508782849258	0.24608629325190412
422.0	0.30384049708492217	-1.2046115118671947
422.0	0.377838713484015	-0.6305626472521836
423.0	-1.5667893069381564	-1.1917493761402282
423.0	2.4037198527736443	-0.9063255342249884
423.0	1.6766295713246449	1.9057638931711613
423.0	-2.5135601171601056	0.19231101719406413
424.0	-0.6713956260517014	-0.03463534869496289
424.0	0.532874079212207	-1.9251475170910934
424.0	0.13852154683949225	1.9597828657860497
425.0	0.196553726213588	1.948252088043414
425.0	-0.9873023912756097	-0.3678272910139313
425.0	0.7907486650620092	-1.5804247970294925
426.0	-2.477635466711155	0.08836643534967144
426.0	0.9737314822310682	-1.4543640497298111
426.0	1.5039039844800843	1.3659976143801298
427.0	0.35054741487064417	0.11420358428733933
427.0	-0.768621329742802	-0.08562484538656716
427.0	0.41807391487214784	-0.028578738900771134
428.0	0.5718171083404991	4.837840880529038
428.0	-6.695804388990759	2.3819864677832343
428.0	0.24860301208095437	-4.304553646957353
428.0	1.343426205466132	-4.599360087276165
428.0	4.531958063103212	1.684086385921226
429.0	-1.2175310612278276	0.8970802279956293
429.0	0.11344299647497204	-1.258389625210644
429.0	1.1040880647528362	0.36130939721500926
430.0	1.3863226946515501	-0.7872774704101784
430.0	5.6467833037345985	0.7634863772126501
430.0	-7.033105998386141	0.023791093197556328
431.0	-0.4928085138367436	-1.783417075517842
431.0	2.4259977629768836	-2.329383291097556
431.0	0.28529241511607834	3.851270245867319
431.0	-2.2184816642562306	0.26153012074808707
432.0	0.3737957179308472	-0.06769715642953915
432.0	-0.15068385659590927	0.23695336583588655
432.0	-0.2231118613349379	-0.1692562094063474
433.0	3.0966523640031927	-0.11731321435293869
433.0	-0.38292549938640474	2.031983286632491
433.0	-2.7137268646167967	-1.9146700722795702
434.0	-5.534037580640922	0.887265831154857
434.0	7.2668484492440655	-4.68140136909053
434.0	-1.7328108686031414	3.7941355379356825
435.0	-2.09864245670637	4.720133455875302
435.0	-0.8045754941924179	-0.8727424527364268
435.0	1.4991038391567408	-3.5521971596048214
435.0	1.670510473342646	-3.627567350842389
435.0	-0.2663963616006069	3.3323735073083354
436.0	-0.10057368332944296	0.0014772437242629116
436.0	-0.008968656599832602	-0.12251102157757561
436.0	0.10954233992927408	0.12103377785332263
437.0	1.1537810579589867	-1.286670842052801
437.0	0.16397021794248698	1.1949946522746193
437.0	-1.3177512759014802	0.09167618977819628
438.0	-2.1881612318171673	-0.4259026300961973
438.0	-0.5179160812393148	-1.2987928078068516
438.0	1.6063531942185925	0.6229258313527706
438.0	1.099724118837887	1.101769606550296
439.0	2.3035303868078905	-2.721120613486323
439.0	-0.6654402520934639	4.28063607376084
439.0	-1.7957573871222061	4.898435797191231
439.0	-1.10213644509403	-2.5789619294264674
439.0	1.2598036975018136	-3.8789893280392658
440.0	-0.36731501901988495	0.0858015096353214
440.0	0.12491294826835543	-0.271996334468517
440.0	0.2424020707515301	0.1861948248331885
441.0	4.268886660645982	-0.8886275663576955
441.0	3.9935834235849175	3.889711117185338
441.0	-3.364950786711742	2.2463201477614967
441.0	-4.296029276568217	-1.2702622691239027
441.0	-0.6014900209509684	-3.9771414294652216
442.0	1.9500914443129207	-1.6815913486399034
442.0	1.064177577227772	1.5580145428808225
442.0	-0.05518285289020917	1.4833092629650348
442.0	-1.0845574018330555	0.9470974080131483
442.0	-1.5621162516026759	-0.365101111111398
442.0	-0.3124125152147477	-1.9417287541077497
443.0	-2.331033681385975	-0.23645118814541932
443.0	0.0022042690553289246	-1.769843156533784
443.0	1.1479203578430963	-0.6079175325828493
443.0	1.2761308442700396	0.47609161899251584
443.0	-0.09522178978251734	2.138120258269553
444.0	0.09676941383012758	-0.1514378957237442
444.0	0.07870338578493903	0.1372882314838539
444.0	-0.17547279961506662	0.014149664239890277
445.0	0.024579467055363787	-0.0813050339068405
445.0	0.01622495761895448	0.04090337421941108
445.0	-0.040804424674342074	0.04040165968744494
446.0	-0.2851839434495233	0.2588845287344899
446.0	0.12052618422032756	-0.465819513609995
446.0	0.16465775922919296	0.20693498487549108
447.0	1.968163435197367	-0.5282667833863105
447.0	-1.0953645879017713	1.521005231538461
447.0	-0.8727988472956097	-0.9927384481521517
448.0	-0.002160403337478124	-0.0010753188963556833
448.0	0.0031106424515015938	0.0006360310104149396
448.0	-0.0009502391140203697	0.0004392878859251606
449.0	0.4024731941520319	-3.2970928155914017
449.0	1.6999156818016337	-2.793460894078564
449.0	-0.630404047226365	2.8802038455843304
449.0	-1.4719848287272739	3.2103498640856722
450.0	0.05232572655557404	0.32070102576882714
450.0	-0.13182635279218416	-0.03628066954585907
450.0	0.07950062623661622	-0.284420356222949
