# Supplementary material
Source: ML conference proceedings conference paper supplement (https://openaccess.thecvf.com/content/CVPR2021/html/Harel_Crossing_Cuts_Polygonal_CVPR_2021_paper.html)
Supplement: Supplementary file 2 [file Harel_Crossing_Cuts_Polygonal_CVPR_2021_supplemental.zip › Dataset/Help.txt]

Each CSV file contains the noised pieces of the puzzle.


Each row contains a piece vertices in the following format:

piece - The number of the piece.
x     - x coordinate.
y     - y coordinate.

E.g the line    "0,11,-6"  is a vertice of piece 0 positioned at (11, -6).


The vertices of each piece are grouped in consecutive rows and are ordered clockwise around the piece's center of mass.
