# Supplementary material
Source: ML conference proceedings conference paper supplement (https://openaccess.thecvf.com/content/CVPR2021/html/Harel_Crossing_Cuts_Polygonal_CVPR_2021_paper.html)
Supplement: Supplementary file 2 [file Harel_Crossing_Cuts_Polygonal_CVPR_2021_supplemental.zip › Dataset/Pictorial/p0/pieces.csv]

piece	x	y
0.0	2.878446194203775	38.35737971071819
0.0	-30.818852474191203	30.103307353021705
0.0	0.752824806207741	-38.81233064125456
0.0	27.187581473779687	-29.648356422485335
1.0	-50.93946388186305	-42.21380615396333
1.0	26.913135072974455	-61.635888845903764
1.0	49.28116006575692	47.638975494085344
1.0	-25.25483125686833	56.21071950578175
2.0	48.74587092806951	-13.839862848232315
2.0	1.1514906083161804	49.41840135535085
2.0	-49.1519087538577	14.54206001009834
2.0	-0.7454527825279911	-50.12059851721688
3.0	-30.489466365303542	-51.92164500742297
3.0	58.03390413282432	-29.222159433684965
3.0	24.884468318435893	51.56578924024575
3.0	-52.42890608595667	29.578015200862183
4.0	67.15882131595076	18.787395160176345
4.0	-25.670734286105173	64.72702172530717
4.0	-64.99602997541767	-18.089522280877645
4.0	23.507942945572083	-65.42489460460587
5.0	26.225329823044603	-29.6629472497425
5.0	40.265136200506504	-13.277563966281377
5.0	-25.29467859897227	32.372193591430914
5.0	-41.19578742457884	10.568317624592964
6.0	-42.56337986627932	-24.467457842130898
6.0	12.455767328286129	-47.08278844394772
6.0	42.623367371393215	24.099656278356633
6.0	-12.515754833400024	47.450590007721985
7.0	-59.851730548038034	8.488699646557485
7.0	21.609817861406107	-56.474895697413665
7.0	59.687429053817134	-6.7154055486706525
7.0	-21.445516367185213	54.70160159952683
8.0	56.1688505507268	29.932612733436883
8.0	-41.77865422893183	53.984280962415426
8.0	-51.502514943330425	-30.305732995125652
8.0	37.11231862153545	-53.61116070072666
9.0	5.579437702925588	49.466349588265984
9.0	-48.37967147285417	-9.83862232823276
9.0	-6.359545151353814	-50.53429007380919
9.0	49.159778921282395	10.906562813775963
10.0	30.51035509206374	58.66555656087614
10.0	-53.888103137032495	36.33414055562275
10.0	-29.538896258503065	-59.74020668522128
10.0	52.91664430347182	-35.2594904312776
11.0	-31.969304394766482	-40.89153379962249
11.0	47.24703292499987	-23.209999559321886
11.0	28.013247565421523	38.418991522552574
11.0	-43.29097609565491	25.682541836391806
12.0	4.456663295888234	-43.50973836389397
12.0	36.689462067809586	-29.87985254767608
12.0	-1.293668663803487	45.14391813193748
12.0	-39.85245669989433	28.24567277963257
13.0	12.59372865341993	-40.96045486114893
13.0	34.33957940528495	19.803910878454303
13.0	-10.788502411903153	39.9444832853693
13.0	-36.144805646801714	-18.787939302674648
14.0	12.625723930956873	42.75999449592932
14.0	-41.27626823098327	17.419588889381018
14.0	-12.22114644640208	-43.0274433257846
14.0	40.87169074642848	-17.152140059525735
15.0	21.148089356202078	53.88824941995637
15.0	-59.16603428586878	4.985286527817152
15.0	-23.484556268453503	-52.77941485174245
15.0	61.502501198120214	-6.094121096031074
16.0	35.78980824194946	-39.2445542862381
16.0	24.992141898673935	44.823272224107995
16.0	-35.267225692320835	38.48073982917799
16.0	-25.51472444830256	-44.05945776704789
17.0	-60.84389543571842	26.189336356200556
17.0	-4.246609242757813	-68.95346196415653
17.0	61.978346585058944	-31.00730425749066
17.0	3.1121580934172925	73.77142986544663
18.0	40.34445369963305	31.48911933803538
18.0	-48.781086112180674	13.81287256726182
18.0	-37.31851259185896	-35.652712589552266
18.0	45.755145004406586	-9.649279315744934
19.0	60.68493826460333	-5.201987447812229
19.0	-3.122693478692767	61.97950571121672
19.0	-61.177805680337016	5.264827875820544
19.0	3.6155608944264515	-62.04234613922503
