# Supplementary material
Source: ML conference proceedings conference paper supplement (https://openaccess.thecvf.com/content/CVPR2021/html/Harel_Crossing_Cuts_Polygonal_CVPR_2021_paper.html)
Supplement: Supplementary file 2 [file Harel_Crossing_Cuts_Polygonal_CVPR_2021_supplemental.zip › Dataset/Pictorial/p1/pieces.csv]

piece	x	y
0.0	39.574603133615504	49.38290366306444
0.0	-50.07412518324052	24.231515286353442
0.0	-41.325897789853435	-15.679996620967586
0.0	-9.130888411364914	-42.666957460854064
0.0	60.95630825084336	-15.267464867596232
1.0	-12.665810783501684	52.04882898802305
1.0	-1.9650057235774057	-52.06442774454638
1.0	12.020869217988775	-48.31239332570988
1.0	2.6099472890903144	48.32799208223321
2.0	-59.438388663962236	10.992999510251138
2.0	-45.80813761690266	-50.42212816090296
2.0	2.05800474983365	-50.698397596750965
2.0	63.28179601317273	3.006603718372844
2.0	41.98477578680498	34.92654356659068
2.0	-2.0780502689464484	52.19437896243926
3.0	16.15245343351719	22.995254781422748
3.0	-22.172119226346016	-4.032114585061098
3.0	-16.019160255978708	-22.723090700875108
3.0	22.038826048807532	3.759950504513462
4.0	-23.297384065541518	-25.12474121189971
4.0	27.803990199603323	-33.91072585483844
4.0	24.503924975116934	30.1581521626621
4.0	2.090365160247348	39.90120323314513
4.0	-31.100896269426084	-11.023888329069088
5.0	15.436647776074373	19.597970178474995
5.0	-29.458236618206463	15.7586799569372
5.0	-40.32438145155175	3.4899637791873346
5.0	14.41672064361773	-38.637784016465915
5.0	39.929249650066104	-0.2088298981336294
6.0	-19.201716499159602	-6.997484593848185
6.0	17.041471283465626	-10.996320875940455
6.0	24.132992294135192	7.057233996730702
6.0	-21.972747078441216	10.936571473057938
7.0	6.496114757261999	43.67940445156622
7.0	-35.328526748328535	1.4133229448283018
7.0	28.832411991066543	-45.092727396394515
8.0	12.69273323372397	18.10020730747902
8.0	-13.198842232206175	26.64476490241719
8.0	-27.95364669759715	-15.633333547132782
8.0	28.459755696079363	-29.111638662763426
9.0	3.556816771519303	-18.10786275533019
9.0	11.006704987747677	21.482116638983825
9.0	-14.563521759266981	-3.374253883653637
10.0	27.387044481698087	-26.497584763121058
10.0	11.135511369635044	40.58031329077788
10.0	-22.908378620289305	5.090831937977111
10.0	-15.614177231043822	-19.17356046563393
11.0	12.627740716892882	-4.954649416814239
11.0	-7.693850400852019	11.128212508357063
11.0	-4.9338903160408645	-6.173563091542822
12.0	-28.55070028484313	7.000654394235276
12.0	-8.727512301305367	-33.176872592441704
12.0	25.732226654819605	-1.6715681027565736
12.0	11.545985931328893	27.847786300963
13.0	-24.328283456738404	12.15937719037015
13.0	-21.856154903682977	-4.958061750186744
13.0	27.435871329483803	-12.685507371770427
13.0	18.74856703093758	5.48419193158702
14.0	52.925546307248595	-0.4076585240788333
14.0	38.04181458015228	39.40868489371838
14.0	-47.12928214577278	2.8930986602388273
14.0	-39.54521598980318	-13.517744703312239
14.0	-4.292862751824899	-28.376380326566128
15.0	3.842733357264933	17.60080093303577
15.0	-18.41317756894159	-8.321508905858991
15.0	2.072991110574094	-10.429514302620646
15.0	12.497453101102565	1.1502222754438662
16.0	19.84769062371735	13.600269885431924
16.0	-29.692105947288912	4.075926378567299
16.0	9.844415323571564	-17.67619626399922
17.0	-9.210215105527823	-66.70351359211433
17.0	26.06353119868072	-63.62989328824658
17.0	63.89724614493025	5.985248475841061
17.0	-15.710946424215308	77.74875248790825
17.0	-27.07430477206981	70.73424725168873
17.0	-37.96531104179803	-24.134841335077155
18.0	6.492636024961939	-3.368803124797826
18.0	-0.7320059283065348	7.689590040102
18.0	-5.7606300966554045	-4.320786915304173
19.0	14.740154030683168	23.01180409590749
19.0	-15.805902947177248	-1.9533557499792842
19.0	1.0657489164940834	-21.058448345928202
20.0	17.590003835427723	29.604135323994228
20.0	-28.227743057232175	22.24709807167892
20.0	-33.05818020648556	-22.621148313949334
20.0	43.69591942829001	-29.230085081723814
